# Supplementary material for: A plant-like mechanism coupling m6A reading to polyadenylation safeguards transcriptome integrity and developmental gene partitioning in Toxoplasma
Source: eLife. 2021 Jul 15;10:e68312. doi: 10.7554/eLife.68312 (PMC8313237; doi:10.7554/eLife.68312)
Supplement: Figure 8—source data 1. [file elife-68312-fig8-data1.xlsx]

## Sheet: out-fusionsMTL-NT-then-IAA-CPSF
	MTTL-NT-chimeras	Norm MTTL-NT-chimeras	MTTL-NT-Total	Norm MTTL-NT-Total	ratio Total/chimera	MTTL-IAA-Chimeras	Norm MTTL-IAA-Chimeras	MTTL-IAA-Total	Norm MTTL-IAA-Total	ratio Total/chimera	LOG2 Fold change UT vs IAA	CPSF30-NT-Chimeras	Norm CPSF30-NT-Chimeras	CPSF30-NT-Total	Norm CPSF30-NT-Total	ratio Total/chimera	CPSF30-IAA-Chimeras	Norm CPSF30-IAA-Chimeras	CPSF30-IAA-Total	Norm CPSF30-IAA-Total	ratio Total/chimera	LOG2 Fch	MORC-IAA-Chimeras	Norm MORC-IAA-Chimeras	MORC-IAA-Chimeras-Total	Norm MORC-IAA-Chimeras-Total	ratio Total/chimera	LOG2 Fch
TGME49_200010	0	0	120	157.333	0.00631579	1	1	172	172	0.0115607	0.872193	0	0	43	141.732	0.00700615	3	4.32763	122	175.99	0.0301013	2.10313	0	0	80	151.768	0.00654585	-0.0980398
TGME49_200110	0	0	0	0	1	0	0	0	0	1	0	0	0	0	0	1	0	0	0	0	1	0	0	0	0	0	1	0
TGME49_200130	0	0	2	2.62222	0.276074	0	0	4	4	0.2	-0.465053	0	0	1	3.29609	0.23277	0	0	7	10.0978	0.090108	-1.36918	0	0	2	3.79421	0.208585	-0.15827
TGME49_200230	0	0	0	0	1	0	0	0	0	1	0	0	0	0	0	1	0	0	0	0	1	0	0	0	0	0	1	0
TGME49_200240	0	0	3	3.93333	0.202703	0	0	0	0	1	2.30256	0	0	1	3.29609	0.23277	0	0	0	0	1	2.10302	0	0	1	1.89711	0.345172	0.568411
TGME49_200250	0	0	225	295	0.00337838	0	0	243	243	0.00409836	0.278716	0	0	89	293.352	0.00339729	0	0	148	213.496	0.00466208	0.456589	0	0	148	280.772	0.00354897	0.0630155
TGME49_200260	3	3.93333	5	6.55556	0.652941	3	3	9	9	0.4	-0.706953	3	9.88827	0	0	10.8883	8	11.5403	11	15.868	0.743441	-3.87241	3	5.69132	4	7.58842	0.779109	-3.80481
TGME49_200270	3	3.93333	23	30.1556	0.158345	3	3	26	26	0.148148	-0.0960327	3	9.88827	10	32.9609	0.320612	8	11.5403	22	31.7359	0.383076	0.256801	3	5.69132	19	36.045	0.180627	-0.827817
TGME49_200280	0	0	24	31.4667	0.0308008	0	0	22	22	0.0434783	0.497325	0	0	6	19.7765	0.0481312	0	0	21	30.2934	0.0319556	-0.590903	0	0	19	36.045	0.0269942	-0.834324
TGME49_200290	0	0	49	64.2444	0.015327	0	0	72	72	0.0136986	-0.162041	0	0	29	95.5866	0.0103534	0	0	48	69.2421	0.0142365	0.459488	0	0	35	66.3987	0.0148371	0.519102
TGME49_200295	3	3.93333	5	6.55556	0.652941	6	6	10	10	0.636364	-0.0371016	3	9.88827	1	3.29609	2.53446	9	12.9829	6	8.65526	1.44821	-0.807403	3	5.69132	4	7.58842	0.779109	-1.70178
TGME49_200300	3	3.93333	5	6.55556	0.652941	6	6	8	8	0.777778	0.252405	3	9.88827	0	0	10.8883	9	12.9829	5	7.21271	1.70259	-2.67697	3	5.69132	4	7.58842	0.779109	-3.80481
TGME49_200310	0	0	105	137.667	0.00721154	0	0	145	145	0.00684932	-0.0743473	0	0	37	121.955	0.00813304	0	0	117	168.778	0.00589006	-0.465511	0	0	77	146.077	0.00679915	-0.258439
TGME49_200320	0	0	17	22.2889	0.0429389	0	0	24	24	0.04	-0.102286	0	0	5	16.4804	0.0572068	0	0	27	38.9487	0.0250321	-1.1924	0	0	13	24.6624	0.0389675	-0.553913
TGME49_200330	0	0	29	38.0222	0.0256264	0	0	34	34	0.0285714	0.156941	0	0	17	56.0335	0.0175335	0	0	22	31.7359	0.0305475	0.800935	0	0	18	34.1479	0.0284512	0.698371
TGME49_200340	0	0	22	28.8444	0.0335071	0	0	42	42	0.0232558	-0.526874	0	0	6	19.7765	0.0481312	0	0	23	33.1785	0.0292582	-0.718133	0	0	17	32.2508	0.0300745	-0.678434
TGME49_200350	0	0	30	39.3333	0.0247934	0	0	63	63	0.015625	-0.666099	0	0	18	59.3296	0.0165756	0	0	33	47.6039	0.0205745	0.311794	0	0	21	39.8392	0.0244863	0.562911
TGME49_200360	0	0	606	794.533	0.00125702	0	0	1097	1097	0.000910747	-0.464884	0	0	266	876.76	0.00113926	0	0	522	753.007	0.00132625	0.219248	0	0	406	770.225	0.00129664	0.186674
TGME49_200370	0	0	7	9.17778	0.0982533	1	1	19	19	0.1	0.0254226	0	0	6	19.7765	0.0481312	1	1.44254	8	11.5403	0.194775	2.01676	0	0	5	9.48553	0.0953695	0.986555
TGME49_200375	5	6.55556	12	15.7333	0.451527	5	5	16	16	0.352941	-0.355385	5	16.4804	1	3.29609	4.06892	7	10.0978	3	4.32763	2.08307	-0.965938	5	9.48553	8	15.1768	0.648181	-2.65018
TGME49_200385	5	6.55556	12	15.7333	0.451527	5	5	14	14	0.4	-0.174813	5	16.4804	1	3.29609	4.06892	7	10.0978	6	8.65526	1.1494	-1.82376	5	9.48553	9	17.074	0.580146	-2.81016
TGME49_200400	0	0	19	24.9111	0.0385935	0	0	37	37	0.0263158	-0.552429	0	0	8	26.3687	0.0365381	0	0	18	25.9658	0.0370841	0.0213985	0	0	14	26.5595	0.0362851	-0.0100213
TGME49_200410	0	0	8	10.4889	0.0870406	0	0	9	9	0.1	0.200239	0	0	1	3.29609	0.23277	1	1.44254	6	8.65526	0.252975	0.120093	0	0	6	11.3826	0.0807582	-1.52722
TGME49_200430	0	0	8	10.4889	0.0870406	0	0	8	8	0.111111	0.352242	0	0	2	6.59218	0.131714	1	1.44254	9	12.9829	0.174681	0.407308	0	0	6	11.3826	0.0807582	-0.705733
TGME49_200440	0	0	0	0	1	0	0	6	6	0.142857	-2.80735	0	0	0	0	1	0	0	1	1.44254	0.409409	-1.28838	0	0	0	0	1	0
TGME49_200450	0	0	5	6.55556	0.132353	0	0	2	2	0.333333	1.33258	0	0	1	3.29609	0.23277	0	0	4	5.77017	0.147707	-0.656168	0	0	4	7.58842	0.116436	-0.999369
TGME49_200460	0	0	8	10.4889	0.0870406	0	0	14	14	0.0666667	-0.384723	0	0	5	16.4804	0.0572068	0	0	9	12.9829	0.071516	0.32208	0	0	7	13.2797	0.0700293	0.291772
TGME49_200470	0	0	13	17.0444	0.0554187	0	0	27	27	0.0357143	-0.633872	0	0	6	19.7765	0.0481312	0	0	14	20.1956	0.0471796	-0.0288096	0	0	6	11.3826	0.0807582	0.746637
TGME49_200480	0	0	0	0	1	0	0	0	0	1	0	0	0	0	0	1	0	0	0	0	1	0	0	0	0	0	1	0
TGME49_200590	0	0	27	35.4	0.0274725	0	0	34	34	0.0285714	0.0565835	0	0	6	19.7765	0.0481312	0	0	27	38.9487	0.0250321	-0.943192	0	0	19	36.045	0.0269942	-0.834324
TGME49_200595	0	0	2	2.62222	0.276074	0	0	26	26	0.037037	-2.89801	0	0	0	0	1	0	0	10	14.4254	0.064828	-3.94724	0	0	1	1.89711	0.345172	-1.53461
TGME49_200600	0	0	0	0	1	0	0	0	0	1	0	0	0	0	0	1	0	0	0	0	1	0	0	0	0	0	1	0
TGME49_200700	0	0	24	31.4667	0.0308008	0	0	16	16	0.0588235	0.933425	0	0	14	46.1453	0.021211	0	0	7	10.0978	0.090108	2.08684	0	0	14	26.5595	0.0362851	0.774564
TGME49_201100	0	0	0	0	1	0	0	0	0	1	0	0	0	0	0	1	0	0	1	1.44254	0.409409	-1.28838	0	0	0	0	1	0
TGME49_201110	0	0	23	30.1556	0.032097	0	0	32	32	0.030303	-0.0829766	0	0	4	13.1844	0.0705002	0	0	15	21.6381	0.0441732	-0.674455	0	0	14	26.5595	0.0362851	-0.958248
TGME49_201120	0	0	14	18.3556	0.0516648	0	0	15	15	0.0625	0.274676	0	0	7	23.0726	0.041541	0	0	16	23.0807	0.0415271	-0.000482897	0	0	9	17.074	0.0553282	0.413481
TGME49_201130	0	0	20	26.2222	0.0367347	0	0	22	22	0.0434783	0.243151	0	0	15	49.4413	0.019825	0	0	11	15.868	0.059284	1.58032	0	0	9	17.074	0.0553282	1.48069
TGME49_201140	0	0	9	11.8	0.078125	0	0	14	14	0.0666667	-0.228819	0	0	0	0	1	0	0	4	5.77017	0.147707	-2.75919	0	0	6	11.3826	0.0807582	-3.63025
TGME49_201150	0	0	16	20.9778	0.0455005	0	0	24	24	0.04	-0.185883	0	0	7	23.0726	0.041541	0	0	15	21.6381	0.0441732	0.088638	0	0	13	24.6624	0.0389675	-0.0922614
TGME49_201160	3	3.93333	3	3.93333	1	9	9	9	9	1	0	4	13.1844	1	3.29609	3.30169	15	21.6381	8	11.5403	1.80523	-0.871026	3	5.69132	1	1.89711	2.30966	-0.515527
TGME49_201170	3	3.93333	346	453.644	0.010851	9	9	435	435	0.0229358	1.07978	4	13.1844	98	323.017	0.0437766	15	21.6381	339	489.022	0.0461982	0.0776766	3	5.69132	233	442.026	0.0151037	-1.53526
TGME49_201180	0	0	4	5.24444	0.160142	0	0	7	7	0.125	-0.357427	0	0	2	6.59218	0.131714	0	0	2	2.88509	0.257395	0.966568	0	0	3	5.69132	0.149447	0.182223
TGME49_201190	1	1.31111	3	3.93333	0.468468	2	2	5	5	0.5	0.0939761	1	3.29609	0	0	4.29609	2	2.88509	0	0	3.88509	-0.145078	1	1.89711	2	3.79421	0.604292	-2.82971
TGME49_201200	1	1.31111	4	5.24444	0.370107	2	2	5	5	0.5	0.433987	1	3.29609	0	0	4.29609	2	2.88509	2	2.88509	1	-2.10302	1	1.89711	2	3.79421	0.604292	-2.82971
TGME49_201210	0	0	2	2.62222	0.276074	0	0	4	4	0.2	-0.465053	0	0	1	3.29609	0.23277	0	0	0	0	1	2.10302	0	0	2	3.79421	0.208585	-0.15827
TGME49_201215	0	0	2	2.62222	0.276074	2	2	3	3	0.75	1.44184	2	6.59218	2	6.59218	1	2	2.88509	0	0	3.88509	1.95795	0	0	2	3.79421	0.208585	-2.26129
TGME49_201220	0	0	4	5.24444	0.160142	2	2	9	9	0.3	0.905608	2	6.59218	3	9.88827	0.697281	2	2.88509	3	4.32763	0.729234	0.0646416	0	0	2	3.79421	0.208585	-1.74111
TGME49_201230	0	0	9	11.8	0.078125	0	0	9	9	0.1	0.356144	0	0	6	19.7765	0.0481312	0	0	1	1.44254	0.409409	3.0885	0	0	6	11.3826	0.0807582	0.746637
TGME49_201240	0	0	4	5.24444	0.160142	0	0	8	8	0.111111	-0.527352	0	0	4	13.1844	0.0705002	0	0	5	7.21271	0.121762	0.78837	0	0	2	3.79421	0.208585	1.56494
TGME49_201250	0	0	10	13.1111	0.0708661	0	0	13	13	0.0714286	0.0114048	0	0	2	6.59218	0.131714	0	0	6	8.65526	0.103571	-0.346801	0	0	8	15.1768	0.0618167	-1.09134
TGME49_201260	0	0	63	82.6	0.0119617	0	0	78	78	0.0126582	0.0816503	0	0	28	92.2905	0.0107192	0	0	30	43.2763	0.0225855	1.0752	0	0	42	79.6785	0.0123949	0.209547
TGME49_201270	0	0	19	24.9111	0.0385935	0	0	32	32	0.030303	-0.348895	0	0	7	23.0726	0.041541	0	0	25	36.0636	0.0269807	-0.622608	0	0	12	22.7653	0.0420782	0.0185385
TGME49_201380	0	0	182	238.622	0.00417324	0	0	255	255	0.00390625	-0.0953821	0	0	60	197.765	0.00503106	0	0	201	289.951	0.003437	-0.54971	0	0	123	233.344	0.00426723	-0.237562
TGME49_201390	0	0	1153	1511.71	0.000661065	1	1	1188	1188	0.00168209	1.34739	0	0	400	1318.44	0.0007579	6	8.65526	841	1213.18	0.00795209	3.39126	0	0	791	1500.61	0.000665951	-0.18659
TGME49_201400	0	0	15	19.6667	0.0483871	1	1	35	35	0.0555556	0.199309	0	0	7	23.0726	0.041541	6	8.65526	62	89.4377	0.106761	1.36178	0	0	9	17.074	0.0553282	0.413481
TGME49_201520	0	0	51	66.8667	0.0147348	0	0	53	53	0.0185185	0.329744	0	0	33	108.771	0.00910988	0	0	40	57.7017	0.0170353	0.903022	0	0	33	62.6045	0.0157222	0.787296
TGME49_201630	0	0	57	74.7333	0.0132042	0	0	62	62	0.015873	0.265577	0	0	29	95.5866	0.0103534	0	0	50	72.1271	0.0136748	0.401416	0	0	42	79.6785	0.0123949	0.259639
TGME49_201640	0	0	0	0	1	0	0	0	0	1	0	0	0	0	0	1	0	0	0	0	1	0	0	0	0	0	1	0
TGME49_201650	0	0	0	0	1	0	0	0	0	1	0	0	0	0	0	1	0	0	1	1.44254	0.409409	-1.28838	0	0	0	0	1	0
TGME49_201660	0	0	0	0	1	0	0	0	0	1	0	0	0	0	0	1	0	0	0	0	1	0	0	0	0	0	1	0
TGME49_201670	0	0	11	14.4222	0.0648415	0	0	12	12	0.0769231	0.246499	0	0	5	16.4804	0.0572068	1	1.44254	7	10.0978	0.220093	1.94385	0	0	6	11.3826	0.0807582	0.497424
TGME49_201680	0	0	45	59	0.0166667	0	0	73	73	0.0135135	-0.302563	0	0	28	92.2905	0.0107192	1	1.44254	48	69.2421	0.0347732	1.69778	0	0	25	47.4277	0.0206494	0.945899
TGME49_201690	0	0	3	3.93333	0.202703	0	0	2	2	0.333333	0.7176	0	0	0	0	1	0	0	2	2.88509	0.257395	-1.95795	0	0	2	3.79421	0.208585	-2.26129
TGME49_201700	0	0	17	22.2889	0.0429389	0	0	23	23	0.0416667	-0.0433926	0	0	13	42.8492	0.0228055	0	0	13	18.7531	0.0506251	1.15047	0	0	12	22.7653	0.0420782	0.883694
TGME49_201710	0	0	6	7.86667	0.112782	0	0	16	16	0.0588235	-0.939071	0	0	6	19.7765	0.0481312	0	0	12	17.3105	0.0546134	0.182283	0	0	3	5.69132	0.149447	1.63459
TGME49_201720	0	0	0	0	1	0	0	3	3	0.25	-2	0	0	0	0	1	0	0	3	4.32763	0.187701	-2.41349	0	0	0	0	1	0
TGME49_201730	7	9.17778	11	14.4222	0.659942	11	11	17	17	0.666667	0.0146256	9	29.6648	4	13.1844	2.16187	18	25.9658	11	15.868	1.59864	-0.43544	7	13.2797	6	11.3826	1.15321	-0.906631
TGME49_201740	7	9.17778	8	10.4889	0.88588	11	11	12	12	0.923077	0.0593395	9	29.6648	3	9.88827	2.81632	18	25.9658	8	11.5403	2.15032	-0.389257	7	13.2797	5	9.48553	1.36185	-1.04824
TGME49_201750	0	0	0	0	1	0	0	1	1	0.5	-1	0	0	0	0	1	0	0	3	4.32763	0.187701	-2.41349	0	0	0	0	1	0
TGME49_201760	0	0	46	60.3111	0.0163103	0	0	57	57	0.0172414	0.0800956	0	0	17	56.0335	0.0175335	0	0	54	77.8973	0.0126747	-0.468166	0	0	28	53.119	0.0184778	0.0756757
TGME49_201770	0	0	11	14.4222	0.0648415	0	0	15	15	0.0625	-0.0530612	0	0	2	6.59218	0.131714	0	0	13	18.7531	0.0506251	-1.37949	0	0	7	13.2797	0.0700293	-0.911384
TGME49_201775	0	0	0	0	1	0	0	2	2	0.333333	-1.58496	0	0	0	0	1	0	0	7	10.0978	0.090108	-3.4722	0	0	0	0	1	0
TGME49_201780	235	308.111	377	494.289	0.624103	423	423	699	699	0.605714	-0.0431459	299	985.531	131	431.788	2.27948	680	980.929	358	516.43	1.8977	-0.26445	235	445.82	268	508.424	0.877107	-1.37788
TGME49_201785	235	308.111	546	715.867	0.431197	423	423	925	925	0.457883	0.0866314	299	985.531	210	692.179	1.4232	680	980.929	456	657.8	1.49048	0.0666429	235	445.82	378	717.106	0.62222	-1.19364
TGME49_201790	0	0	10	13.1111	0.0708661	0	0	21	21	0.0454545	-0.640672	0	0	7	23.0726	0.041541	1	1.44254	20	28.8509	0.0818249	0.978005	0	0	9	17.074	0.0553282	0.413481
TGME49_201800	0	0	51	66.8667	0.0147348	0	0	62	62	0.015873	0.107351	0	0	30	98.8827	0.0100117	0	0	61	87.9951	0.0112366	0.166508	0	0	39	73.9871	0.0133356	0.413591
TGME49_201810	0	0	24	31.4667	0.0308008	0	0	24	24	0.04	0.377031	0	0	10	32.9609	0.0294456	0	0	13	18.7531	0.0506251	0.781799	0	0	16	30.3537	0.0318942	0.115239
TGME49_201820	0	0	7	9.17778	0.0982533	0	0	6	6	0.142857	0.539996	0	0	3	9.88827	0.091842	0	0	3	4.32763	0.187701	1.03121	0	0	2	3.79421	0.208585	1.18341
TGME49_201830	0	0	5	6.55556	0.132353	0	0	8	8	0.111111	-0.252387	0	0	0	0	1	0	0	4	5.77017	0.147707	-2.75919	0	0	2	3.79421	0.208585	-2.26129
TGME49_201840	0	0	23	30.1556	0.032097	0	0	41	41	0.0238095	-0.4309	0	0	9	29.6648	0.0326107	0	0	25	36.0636	0.0269807	-0.273418	0	0	16	30.3537	0.0318942	-0.0320518
TGME49_201850	0	0	0	0	1	0	0	0	0	1	0	0	0	0	0	1	0	0	1	1.44254	0.409409	-1.28838	0	0	0	0	1	0
TGME49_201860	0	0	1107	1451.4	0.000688516	0	0	1442	1442	0.000693001	0.00936754	0	0	433	1427.21	0.000700179	0	0	1028	1482.93	0.000673884	-0.0552221	0	0	757	1436.11	0.000695841	-0.00896502
TGME49_201870	0	0	19	24.9111	0.0385935	0	0	29	29	0.0333333	-0.211392	0	0	14	46.1453	0.021211	0	0	11	15.868	0.059284	1.48283	0	0	15	28.4566	0.0339483	0.678522
TGME49_201880	0	0	224	293.689	0.00339341	0	0	368	368	0.00271003	-0.324428	0	0	73	240.615	0.00413882	0	0	287	414.01	0.00240958	-0.780438	0	0	152	288.36	0.0034559	-0.260159
TGME49_201890	0	0	0	0	1	0	0	0	0	1	0	0	0	0	0	1	0	0	0	0	1	0	0	0	0	0	1	0
TGME49_201895	0	0	0	0	1	0	0	0	0	1	0	0	0	0	0	1	0	0	0	0	1	0	0	0	0	0	1	0
TGME49_201900	0	0	8	10.4889	0.0870406	0	0	11	11	0.0833333	-0.0627951	0	0	3	9.88827	0.091842	0	0	6	8.65526	0.103571	0.173388	0	0	6	11.3826	0.0807582	-0.185544
TGME49_202010	0	0	10	13.1111	0.0708661	0	0	19	19	0.05	-0.503168	0	0	5	16.4804	0.0572068	0	0	5	7.21271	0.121762	1.08981	0	0	6	11.3826	0.0807582	0.497424
TGME49_202020	0	0	4	5.24444	0.160142	0	0	15	15	0.0625	-1.35743	0	0	0	0	1	0	0	1	1.44254	0.409409	-1.28838	0	0	2	3.79421	0.208585	-2.26129
TGME49_202025	0	0	0	0	1	0	0	0	0	1	0	0	0	0	0	1	0	0	0	0	1	0	0	0	0	0	1	0
TGME49_202030	0	0	35	45.8889	0.021327	0	0	78	78	0.0126582	-0.752607	0	0	17	56.0335	0.0175335	0	0	67	96.6504	0.0102406	-0.775815	0	0	21	39.8392	0.0244863	0.481854
TGME49_202040	0	0	26	34.0889	0.0284991	0	0	18	18	0.0526316	0.885015	0	0	7	23.0726	0.041541	0	0	10	14.4254	0.064828	0.642083	0	0	18	34.1479	0.0284512	-0.546045
TGME49_202050	0	0	0	0	1	0	0	1	1	0.5	-1	0	0	0	0	1	0	0	0	0	1	0	0	0	0	0	1	0
TGME49_202060	0	0	0	0	1	0	0	0	0	1	0	0	0	0	0	1	0	0	0	0	1	0	0	0	0	0	1	0
TGME49_202065	0	0	0	0	1	0	0	0	0	1	0	0	0	0	0	1	0	0	0	0	1	0	0	0	0	0	1	0
TGME49_202070	0	0	13	17.0444	0.0554187	0	0	8	8	0.111111	1.00356	0	0	4	13.1844	0.0705002	0	0	9	12.9829	0.071516	0.0206387	0	0	8	15.1768	0.0618167	-0.18963
TGME49_202080	0	0	4	5.24444	0.160142	0	0	7	7	0.125	-0.357427	0	0	2	6.59218	0.131714	0	0	3	4.32763	0.187701	0.511021	0	0	2	3.79421	0.208585	0.66322
TGME49_202090	0	0	0	0	1	0	0	1	1	0.5	-1	0	0	0	0	1	0	0	0	0	1	0	0	0	0	0	1	0
TGME49_202100	0	0	0	0	1	0	0	0	0	1	0	0	0	0	0	1	0	0	0	0	1	0	0	0	0	0	1	0
TGME49_202110	0	0	0	0	1	0	0	0	0	1	0	0	0	0	0	1	0	0	0	0	1	0	0	0	0	0	1	0
TGME49_202120	0	0	15	19.6667	0.0483871	0	0	12	12	0.0769231	0.668794	0	0	17	56.0335	0.0175335	0	0	22	31.7359	0.0305475	0.800935	0	0	8	15.1768	0.0618167	1.81788
TGME49_202140	0	0	0	0	1	0	0	0	0	1	0	0	0	0	0	1	0	0	0	0	1	0	0	0	0	0	1	0
TGME49_202160	0	0	10	13.1111	0.0708661	0	0	12	12	0.0769231	0.11832	0	0	5	16.4804	0.0572068	0	0	8	11.5403	0.0797426	0.479165	0	0	8	15.1768	0.0618167	0.111811
TGME49_202170	0	0	6	7.86667	0.112782	0	0	6	6	0.142857	0.341037	0	0	2	6.59218	0.131714	0	0	3	4.32763	0.187701	0.511021	0	0	4	7.58842	0.116436	-0.17788
TGME49_202180	0	0	33	43.2667	0.0225904	0	0	28	28	0.0344828	0.610168	0	0	25	82.4022	0.0119901	0	0	19	27.4083	0.035201	1.55377	0	0	23	43.6334	0.0224047	0.901961
TGME49_202190	0	0	12	15.7333	0.059761	0	0	15	15	0.0625	0.064653	0	0	9	29.6648	0.0326107	0	0	16	23.0807	0.0415271	0.348707	0	0	9	17.074	0.0553282	0.762672
TGME49_202200	0	0	151	197.978	0.00502569	1	1	139	139	0.0142857	1.50718	0	0	49	161.508	0.00615353	3	4.32763	103	148.582	0.0356168	2.53307	0	0	97	184.019	0.00540484	-0.187162
TGME49_202205	0	0	0	0	1	2	2	5	5	0.5	-1	0	0	0	0	1	5	7.21271	6	8.65526	0.850595	-0.233456	0	0	0	0	1	0
TGME49_202210	0	0	0	0	1	2	2	4	4	0.6	-0.736966	0	0	0	0	1	5	7.21271	7	10.0978	0.740031	-0.434343	0	0	0	0	1	0
TGME49_202220	0	0	16	20.9778	0.0455005	0	0	21	21	0.0454545	-0.001458	0	0	5	16.4804	0.0572068	0	0	8	11.5403	0.0797426	0.479165	0	0	9	17.074	0.0553282	-0.0481702
TGME49_202230	0	0	9	11.8	0.078125	0	0	6	6	0.142857	0.870717	0	0	2	6.59218	0.131714	0	0	9	12.9829	0.071516	-0.881076	0	0	5	9.48553	0.0953695	-0.465814
TGME49_202240	0	0	2	2.62222	0.276074	0	0	7	7	0.125	-1.14312	0	0	1	3.29609	0.23277	0	0	0	0	1	2.10302	0	0	0	0	1	2.10302
TGME49_202250	0	0	11	14.4222	0.0648415	0	0	14	14	0.0666667	0.0400482	0	0	3	9.88827	0.091842	0	0	7	10.0978	0.090108	-0.0274991	0	0	6	11.3826	0.0807582	-0.185544
TGME49_202255	0	0	3	3.93333	0.202703	0	0	15	15	0.0625	-1.69744	0	0	3	9.88827	0.091842	0	0	7	10.0978	0.090108	-0.0274991	0	0	1	1.89711	0.345172	1.91009
TGME49_202260	0	0	0	0	1	0	0	0	0	1	0	0	0	0	0	1	0	0	0	0	1	0	0	0	0	0	1	0
TGME49_202280	0	0	4	5.24444	0.160142	0	0	13	13	0.0714286	-1.16478	0	0	0	0	1	0	0	19	27.4083	0.035201	-4.82824	0	0	1	1.89711	0.345172	-1.53461
TGME49_202285	0	0	0	0	1	0	0	0	0	1	0	0	0	0	0	1	0	0	0	0	1	0	0	0	0	0	1	0
TGME49_202290	0	0	21	27.5333	0.0350467	0	0	17	17	0.0555556	0.664651	0	0	5	16.4804	0.0572068	0	0	26	37.5061	0.0259699	-1.13935	0	0	13	24.6624	0.0389675	-0.553913
TGME49_202300	0	0	19	24.9111	0.0385935	0	0	21	21	0.0454545	0.236067	0	0	6	19.7765	0.0481312	0	0	20	28.8509	0.0334999	-0.522817	0	0	14	26.5595	0.0362851	-0.407594
TGME49_202310	0	0	16	20.9778	0.0455005	0	0	17	17	0.0555556	0.288049	0	0	11	36.257	0.0268406	0	0	14	20.1956	0.0471796	0.813746	0	0	7	13.2797	0.0700293	1.38354
TGME49_202320	0	0	0	0	1	0	0	0	0	1	0	0	0	0	0	1	0	0	0	0	1	0	0	0	0	0	1	0
TGME49_202330	0	0	0	0	1	0	0	0	0	1	0	0	0	0	0	1	0	0	0	0	1	0	0	0	0	0	1	0
TGME49_202340	0	0	0	0	1	0	0	1	1	0.5	-1	0	0	0	0	1	0	0	0	0	1	0	0	0	0	0	1	0
TGME49_202350	0	0	15	19.6667	0.0483871	0	0	12	12	0.0769231	0.668794	0	0	6	19.7765	0.0481312	0	0	19	27.4083	0.035201	-0.451358	0	0	10	18.9711	0.0500725	0.0570442
TGME49_202360	0	0	4	5.24444	0.160142	1	1	13	13	0.142857	-0.164782	0	0	2	6.59218	0.131714	2	2.88509	10	14.4254	0.251862	0.935222	0	0	3	5.69132	0.149447	0.182223
TGME49_202370	0	0	61	79.9778	0.0123491	1	1	87	87	0.0227273	0.880023	0	0	28	92.2905	0.0107192	2	2.88509	70	100.978	0.0380973	1.82949	0	0	41	77.7814	0.0126934	0.243876
TGME49_202375	0	0	0	0	1	0	0	7	7	0.125	-3	0	0	0	0	1	0	0	4	5.77017	0.147707	-2.75919	0	0	0	0	1	0
TGME49_202380	0	0	78	102.267	0.00968367	0	0	104	104	0.00952381	-0.0240147	0	0	21	69.2179	0.0142414	0	0	83	119.731	0.00828287	-0.781886	0	0	54	102.444	0.00966709	-0.558936
TGME49_202390	0	0	48	62.9333	0.0156413	0	0	43	43	0.0227273	0.539065	0	0	23	75.8101	0.0130191	0	0	34	49.0465	0.0199814	0.618027	0	0	30	56.9132	0.0172672	0.407403
TGME49_202400	0	0	1	1.31111	0.432692	0	0	2	2	0.333333	-0.376376	0	0	0	0	1	0	0	0	0	1	0	0	0	1	1.89711	0.345172	-1.53461
TGME49_202410	0	0	14	18.3556	0.0516648	0	0	13	13	0.0714286	0.467321	0	0	2	6.59218	0.131714	0	0	4	5.77017	0.147707	0.165322	0	0	8	15.1768	0.0618167	-1.09134
TGME49_202420	0	0	5	6.55556	0.132353	0	0	20	20	0.047619	-1.47478	0	0	5	16.4804	0.0572068	0	0	10	14.4254	0.064828	0.180432	0	0	4	7.58842	0.116436	1.02528
TGME49_202430	0	0	2	2.62222	0.276074	0	0	6	6	0.142857	-0.95048	0	0	0	0	1	0	0	2	2.88509	0.257395	-1.95795	0	0	1	1.89711	0.345172	-1.53461
TGME49_202440	0	0	6	7.86667	0.112782	0	0	10	10	0.0909091	-0.31104	0	0	4	13.1844	0.0705002	0	0	7	10.0978	0.090108	0.354027	0	0	2	3.79421	0.208585	1.56494
TGME49_202445	0	0	1	1.31111	0.432692	0	0	0	0	1	1.20859	0	0	0	0	1	0	0	0	0	1	0	0	0	1	1.89711	0.345172	-1.53461
TGME49_202450	0	0	12	15.7333	0.059761	0	0	19	19	0.05	-0.257275	0	0	10	32.9609	0.0294456	0	0	9	12.9829	0.071516	1.28021	0	0	5	9.48553	0.0953695	1.69547
TGME49_202460	0	0	10	13.1111	0.0708661	0	0	10	10	0.0909091	0.359328	0	0	2	6.59218	0.131714	0	0	2	2.88509	0.257395	0.966568	0	0	9	17.074	0.0553282	-1.25133
TGME49_202470	0	0	6	7.86667	0.112782	0	0	10	10	0.0909091	-0.31104	0	0	7	23.0726	0.041541	0	0	4	5.77017	0.147707	1.83013	0	0	1	1.89711	0.345172	3.05471
TGME49_202480	0	0	6	7.86667	0.112782	0	0	5	5	0.166667	0.563429	0	0	4	13.1844	0.0705002	0	0	7	10.0978	0.090108	0.354027	0	0	5	9.48553	0.0953695	0.435901
TGME49_202490	0	0	18	23.6	0.0406504	0	0	22	22	0.0434783	0.0970245	0	0	7	23.0726	0.041541	0	0	8	11.5403	0.0797426	0.940817	0	0	10	18.9711	0.0500725	0.269483
TGME49_202500	0	0	416	545.422	0.00183009	0	0	590	590	0.00169205	-0.113142	0	0	154	507.598	0.00196619	0	0	400	577.017	0.00173005	-0.184587	0	0	296	561.543	0.00177764	-0.145439
TGME49_202510	0	0	52	68.1778	0.0144555	0	0	48	48	0.0204082	0.497527	0	0	14	46.1453	0.021211	0	0	45	64.9144	0.0151712	-0.483482	0	0	33	62.6045	0.0157222	-0.432016
TGME49_202520	0	0	16	20.9778	0.0455005	0	0	23	23	0.0416667	-0.126989	0	0	4	13.1844	0.0705002	0	0	10	14.4254	0.064828	-0.12101	0	0	7	13.2797	0.0700293	-0.00966918
TGME49_202530	0	0	25	32.7778	0.0296053	0	0	26	26	0.037037	0.323115	0	0	14	46.1453	0.021211	0	0	18	25.9658	0.0370841	0.805983	0	0	16	30.3537	0.0318942	0.588477
TGME49_202540	0	0	21	27.5333	0.0350467	0	0	26	26	0.037037	0.0796889	0	0	7	23.0726	0.041541	0	0	25	36.0636	0.0269807	-0.622608	0	0	15	28.4566	0.0339483	-0.291197
TGME49_202550	0	0	0	0	1	0	0	1	1	0.5	-1	0	0	0	0	1	0	0	1	1.44254	0.409409	-1.28838	0	0	0	0	1	0
TGME49_202568	0	0	13	17.0444	0.0554187	0	0	20	20	0.047619	-0.218835	0	0	3	9.88827	0.091842	0	0	13	18.7531	0.0506251	-0.859301	0	0	9	17.074	0.0553282	-0.731138
TGME49_202572	0	0	7	9.17778	0.0982533	0	0	5	5	0.166667	0.762388	0	0	2	6.59218	0.131714	0	0	11	15.868	0.059284	-1.1517	0	0	5	9.48553	0.0953695	-0.465814
TGME49_202580	0	0	1	1.31111	0.432692	0	0	0	0	1	1.20859	0	0	1	3.29609	0.23277	0	0	0	0	1	2.10302	0	0	1	1.89711	0.345172	0.568411
TGME49_202590	0	0	3	3.93333	0.202703	0	0	8	8	0.111111	-0.867362	0	0	0	0	1	0	0	3	4.32763	0.187701	-2.41349	0	0	2	3.79421	0.208585	-2.26129
TGME49_202600	0	0	0	0	1	0	0	0	0	1	0	0	0	0	0	1	0	0	0	0	1	0	0	0	0	0	1	0
TGME49_202610	0	0	49	64.2444	0.015327	0	0	64	64	0.0153846	0.00541534	0	0	24	79.1061	0.0124834	0	0	46	66.357	0.0148463	0.250086	0	0	35	66.3987	0.0148371	0.249192
TGME49_202620	0	0	159	208.467	0.00477403	0	0	411	411	0.00242718	-0.975924	0	0	66	217.542	0.00457578	0	0	176	253.888	0.0039233	-0.221951	0	0	102	193.505	0.00514126	0.168104
TGME49_202630	0	0	21	27.5333	0.0350467	0	0	36	36	0.027027	-0.374877	0	0	9	29.6648	0.0326107	0	0	24	34.621	0.0280733	-0.216145	0	0	14	26.5595	0.0362851	0.154035
TGME49_202640	0	0	6	7.86667	0.112782	0	0	6	6	0.142857	0.341037	0	0	0	0	1	0	0	1	1.44254	0.409409	-1.28838	0	0	4	7.58842	0.116436	-3.10239
TGME49_202650	0	0	5	6.55556	0.132353	0	0	6	6	0.142857	0.110183	0	0	2	6.59218	0.131714	0	0	6	8.65526	0.103571	-0.346801	0	0	3	5.69132	0.149447	0.182223
TGME49_202660	0	0	0	0	1	0	0	0	0	1	0	0	0	0	0	1	0	0	0	0	1	0	0	0	0	0	1	0
TGME49_202670	0	0	0	0	1	0	0	0	0	1	0	0	0	0	0	1	0	0	0	0	1	0	0	0	0	0	1	0
TGME49_202680	0	0	86	112.756	0.00879078	0	0	108	108	0.00917431	0.0616089	0	0	38	125.251	0.0079207	0	0	81	116.846	0.00848565	0.099397	0	0	51	96.7524	0.0102299	0.369095
TGME49_202690	0	0	8	10.4889	0.0870406	0	0	9	9	0.1	0.200239	0	0	4	13.1844	0.0705002	0	0	7	10.0978	0.090108	0.354027	0	0	4	7.58842	0.116436	0.723835
TGME49_202700	0	0	4	5.24444	0.160142	0	0	11	11	0.0833333	-0.942389	0	0	2	6.59218	0.131714	0	0	5	7.21271	0.121762	-0.113345	0	0	3	5.69132	0.149447	0.182223
TGME49_202720	0	0	0	0	1	0	0	1	1	0.5	-1	0	0	0	0	1	0	0	4	5.77017	0.147707	-2.75919	0	0	0	0	1	0
TGME49_202730	0	0	7	9.17778	0.0982533	0	0	9	9	0.1	0.0254226	0	0	2	6.59218	0.131714	0	0	6	8.65526	0.103571	-0.346801	0	0	5	9.48553	0.0953695	-0.465814
TGME49_202735	0	0	0	0	1	0	0	0	0	1	0	0	0	0	0	1	0	0	1	1.44254	0.409409	-1.28838	0	0	0	0	1	0
TGME49_202740	0	0	3	3.93333	0.202703	0	0	2	2	0.333333	0.7176	0	0	1	3.29609	0.23277	0	0	0	0	1	2.10302	0	0	2	3.79421	0.208585	-0.15827
TGME49_202750	0	0	13	17.0444	0.0554187	0	0	11	11	0.0833333	0.58852	0	0	2	6.59218	0.131714	0	0	6	8.65526	0.103571	-0.346801	0	0	11	20.8682	0.0457286	-1.52625
TGME49_202760	0	0	4	5.24444	0.160142	0	0	10	10	0.0909091	-0.816858	0	0	2	6.59218	0.131714	0	0	10	14.4254	0.064828	-1.02272	0	0	3	5.69132	0.149447	0.182223
TGME49_202770	0	0	69	90.4667	0.0109329	0	0	92	92	0.0107527	-0.0239846	0	0	33	108.771	0.00910988	0	0	79	113.961	0.00869861	-0.0666467	0	0	48	91.0611	0.0108624	0.253833
TGME49_202780	0	0	37	48.5111	0.0201975	0	0	46	46	0.0212766	0.0750916	0	0	8	26.3687	0.0365381	1	1.44254	19	27.4083	0.0859799	1.2346	0	0	24	45.5305	0.0214913	-0.76565
TGME49_202790	0	0	7	9.17778	0.0982533	0	0	8	8	0.111111	0.177426	0	0	1	3.29609	0.23277	1	1.44254	12	17.3105	0.133396	-0.803192	0	0	2	3.79421	0.208585	-0.15827
TGME49_202800	0	0	3	3.93333	0.202703	0	0	4	4	0.2	-0.0193653	0	0	1	3.29609	0.23277	0	0	7	10.0978	0.090108	-1.36918	0	0	2	3.79421	0.208585	-0.15827
TGME49_202810	0	0	5	6.55556	0.132353	0	0	9	9	0.1	-0.40439	0	0	3	9.88827	0.091842	0	0	5	7.21271	0.121762	0.406844	0	0	4	7.58842	0.116436	0.342309
TGME49_202820	0	0	33	43.2667	0.0225904	0	0	44	44	0.0222222	-0.0237043	0	0	13	42.8492	0.0228055	0	0	37	53.3741	0.0183911	-0.31037	0	0	21	39.8392	0.0244863	0.102594
TGME49_202830	0	0	185	242.556	0.00410584	1	1	266	266	0.00749064	0.867411	0	0	85	280.168	0.0035566	1	1.44254	167	240.905	0.0100971	1.50538	0	0	132	250.418	0.00397744	0.161342
TGME49_202840	0	0	97	127.178	0.00780166	1	1	102	102	0.0194175	1.3155	0	0	42	138.436	0.00717176	1	1.44254	65	93.7653	0.0257747	1.84555	0	0	61	115.723	0.00856726	0.256506
TGME49_202850	0	0	0	0	1	0	0	3	3	0.25	-2	0	0	0	0	1	0	0	5	7.21271	0.121762	-3.03786	0	0	0	0	1	0
TGME49_202860	1	1.31111	5	6.55556	0.305882	0	0	5	5	0.166667	-0.876011	1	3.29609	3	9.88827	0.394561	2	2.88509	5	7.21271	0.473057	0.261766	1	1.89711	3	5.69132	0.432965	0.134001
TGME49_202870	1	1.31111	2	2.62222	0.638037	0	0	0	0	1	0.648288	1	3.29609	1	3.29609	1	2	2.88509	3	4.32763	0.729234	-0.455547	1	1.89711	2	3.79421	0.604292	-0.726681
TGME49_202880	0	0	3	3.93333	0.202703	0	0	3	3	0.25	0.302563	0	0	1	3.29609	0.23277	0	0	3	4.32763	0.187701	-0.310469	0	0	2	3.79421	0.208585	-0.15827
TGME49_202890	0	0	31	40.6444	0.0240128	0	0	49	49	0.02	-0.263804	0	0	11	36.257	0.0268406	0	0	35	50.489	0.0194216	-0.466753	0	0	21	39.8392	0.0244863	-0.132445
TGME49_202895	0	0	4	5.24444	0.160142	0	0	7	7	0.125	-0.357427	0	0	0	0	1	0	0	14	20.1956	0.0471796	-4.40569	0	0	3	5.69132	0.149447	-2.74229
TGME49_202900	0	0	21	27.5333	0.0350467	0	0	17	17	0.0555556	0.664651	0	0	4	13.1844	0.0705002	0	0	21	30.2934	0.0319556	-1.14156	0	0	14	26.5595	0.0362851	-0.958248
TGME49_202910	0	0	1	1.31111	0.432692	0	0	1	1	0.5	0.208587	0	0	0	0	1	0	0	1	1.44254	0.409409	-1.28838	0	0	1	1.89711	0.345172	-1.53461
TGME49_202920	0	0	12	15.7333	0.059761	0	0	27	27	0.0357143	-0.742702	0	0	5	16.4804	0.0572068	0	0	16	23.0807	0.0415271	-0.462134	0	0	8	15.1768	0.0618167	0.111811
TGME49_202930	0	0	1	1.31111	0.432692	0	0	1	1	0.5	0.208587	0	0	0	0	1	0	0	4	5.77017	0.147707	-2.75919	0	0	1	1.89711	0.345172	-1.53461
TGME49_202940	0	0	22	28.8444	0.0335071	0	0	35	35	0.0277778	-0.270535	0	0	5	16.4804	0.0572068	0	0	26	37.5061	0.0259699	-1.13935	0	0	13	24.6624	0.0389675	-0.553913
TGME49_202950	0	0	25	32.7778	0.0296053	0	0	23	23	0.0416667	0.49304	0	0	19	62.6257	0.0157169	0	0	18	25.9658	0.0370841	1.23848	0	0	19	36.045	0.0269942	0.78033
TGME49_202960	0	0	7	9.17778	0.0982533	0	0	13	13	0.0714286	-0.460004	0	0	3	9.88827	0.091842	0	0	5	7.21271	0.121762	0.406844	0	0	3	5.69132	0.149447	0.702412
TGME49_202970	0	0	0	0	1	0	0	1	1	0.5	-1	0	0	0	0	1	0	0	0	0	1	0	0	0	0	0	1	0
TGME49_202975	0	0	0	0	1	0	0	2	2	0.333333	-1.58496	0	0	0	0	1	0	0	0	0	1	0	0	0	0	0	1	0
TGME49_202980	0	0	12	15.7333	0.059761	0	0	21	21	0.0454545	-0.394779	0	0	7	23.0726	0.041541	0	0	18	25.9658	0.0370841	-0.163736	0	0	8	15.1768	0.0618167	0.573463
TGME49_202990	0	0	0	0	1	0	0	0	0	1	0	0	0	0	0	1	0	0	1	1.44254	0.409409	-1.28838	0	0	0	0	1	0
TGME49_203000	0	0	0	0	1	0	0	0	0	1	0	0	0	0	0	1	0	0	0	0	1	0	0	0	0	0	1	0
TGME49_203010	0	0	28	36.7111	0.0265174	0	0	23	23	0.0416667	0.651955	0	0	5	16.4804	0.0572068	0	0	15	21.6381	0.0441732	-0.373013	0	0	14	26.5595	0.0362851	-0.656807
TGME49_203020	0	0	10	13.1111	0.0708661	0	0	5	5	0.166667	1.2338	0	0	2	6.59218	0.131714	0	0	4	5.77017	0.147707	0.165322	0	0	6	11.3826	0.0807582	-0.705733
TGME49_203030	0	0	59	77.3556	0.0127623	0	0	79	79	0.0125	-0.0299644	0	0	21	69.2179	0.0142414	0	0	60	86.5526	0.0114217	-0.318311	0	0	42	79.6785	0.0123949	-0.200345
TGME49_203040	1	1.31111	15	19.6667	0.111828	1	1	20	20	0.0952381	-0.23167	1	3.29609	4	13.1844	0.302875	1	1.44254	12	17.3105	0.133396	-1.18301	1	1.89711	10	18.9711	0.145065	-1.06202
TGME49_203050	1	1.31111	12	15.7333	0.138114	1	1	5	5	0.333333	1.2711	1	3.29609	2	6.59218	0.565857	1	1.44254	1	1.44254	1	0.82149	1	1.89711	8	15.1768	0.17909	-1.65976
TGME49_203060	0	0	79	103.578	0.00956226	0	0	115	115	0.00862069	-0.149548	0	0	30	98.8827	0.0100117	0	0	64	92.3227	0.0107155	0.0980059	0	0	55	104.341	0.00949299	-0.0767584
TGME49_203070	0	0	0	0	1	0	0	0	0	1	0	0	0	0	0	1	0	0	0	0	1	0	0	0	0	0	1	0
TGME49_203080	0	0	34	44.5778	0.0219405	0	0	40	40	0.0243902	0.152707	0	0	13	42.8492	0.0228055	0	0	46	66.357	0.0148463	-0.619278	0	0	22	41.7363	0.0233993	0.0370861
TGME49_203090	0	0	0	0	1	0	0	0	0	1	0	0	0	0	0	1	0	0	0	0	1	0	0	0	0	0	1	0
TGME49_203100	0	0	0	0	1	0	0	0	0	1	0	0	0	0	0	1	0	0	0	0	1	0	0	0	0	0	1	0
TGME49_203110	0	0	11	14.4222	0.0648415	0	0	11	11	0.0833333	0.361976	0	0	0	0	1	0	0	1	1.44254	0.409409	-1.28838	0	0	7	13.2797	0.0700293	-3.8359
TGME49_203120	0	0	4	5.24444	0.160142	0	0	12	12	0.0769231	-1.05787	0	0	2	6.59218	0.131714	0	0	12	17.3105	0.0546134	-1.27009	0	0	2	3.79421	0.208585	0.66322
TGME49_203135	0	0	0	0	1	0	0	0	0	1	0	0	0	0	0	1	0	0	1	1.44254	0.409409	-1.28838	0	0	0	0	1	0
TGME49_203150	0	0	4	5.24444	0.160142	0	0	7	7	0.125	-0.357427	0	0	0	0	1	0	0	3	4.32763	0.187701	-2.41349	0	0	4	7.58842	0.116436	-3.10239
TGME49_203160	0	0	6	7.86667	0.112782	0	0	17	17	0.0555556	-1.02153	0	0	4	13.1844	0.0705002	0	0	4	5.77017	0.147707	1.06704	0	0	4	7.58842	0.116436	0.723835
TGME49_203170	0	0	54	70.8	0.0139276	0	0	84	84	0.0117647	-0.243479	0	0	32	105.475	0.00939189	0	0	60	86.5526	0.0114217	0.282291	0	0	40	75.8842	0.0130066	0.469753
TGME49_203175	0	0	0	0	1	0	0	0	0	1	0	0	0	0	0	1	0	0	0	0	1	0	0	0	0	0	1	0
TGME49_203180	0	0	7	9.17778	0.0982533	0	0	5	5	0.166667	0.762388	0	0	4	13.1844	0.0705002	0	0	1	1.44254	0.409409	2.53785	0	0	5	9.48553	0.0953695	0.435901
TGME49_203200	0	0	0	0	1	0	0	1	1	0.5	-1	0	0	0	0	1	0	0	0	0	1	0	0	0	0	0	1	0
TGME49_203220	0	0	7	9.17778	0.0982533	0	0	3	3	0.25	1.34735	0	0	3	9.88827	0.091842	0	0	6	8.65526	0.103571	0.173388	0	0	5	9.48553	0.0953695	0.0543746
TGME49_203230	0	0	0	0	1	0	0	3	3	0.25	-2	0	0	0	0	1	0	0	1	1.44254	0.409409	-1.28838	0	0	0	0	1	0
TGME49_203240	0	0	27	35.4	0.0274725	0	0	32	32	0.030303	0.141472	0	0	16	52.7374	0.018609	0	0	26	37.5061	0.0259699	0.48084	0	0	18	34.1479	0.0284512	0.612488
TGME49_203250	0	0	0	0	1	0	0	0	0	1	0	0	0	0	0	1	0	0	0	0	1	0	0	0	0	0	1	0
TGME49_203260	0	0	9	11.8	0.078125	0	0	7	7	0.125	0.678072	0	0	2	6.59218	0.131714	0	0	4	5.77017	0.147707	0.165322	0	0	5	9.48553	0.0953695	-0.465814
TGME49_203270	0	0	3	3.93333	0.202703	0	0	3	3	0.25	0.302563	0	0	0	0	1	0	0	2	2.88509	0.257395	-1.95795	0	0	2	3.79421	0.208585	-2.26129
TGME49_203280	0	0	7	9.17778	0.0982533	0	0	23	23	0.0416667	-1.23761	0	0	5	16.4804	0.0572068	0	0	10	14.4254	0.064828	0.180432	0	0	4	7.58842	0.116436	1.02528
TGME49_203290	0	0	38	49.8222	0.0196764	0	0	105	105	0.00943396	-1.06053	0	0	14	46.1453	0.021211	0	0	25	36.0636	0.0269807	0.347111	0	0	24	45.5305	0.0214913	0.0189343
TGME49_203300	1	1.31111	41	53.7556	0.0422078	11	11	465	465	0.0257511	-0.712877	1	3.29609	17	56.0335	0.0753257	19	27.4083	220	317.359	0.0892335	0.244443	1	1.89711	28	53.119	0.0535322	-0.492736
TGME49_203310	1	1.31111	2414	3165.02	0.000729973	11	11	1961	1961	0.00611621	3.06672	1	3.29609	910	2999.44	0.00143182	19	27.4083	1257	1813.28	0.0156582	3.451	1	1.89711	1627	3086.59	0.000938306	-0.609719
TGME49_203320	0	0	18	23.6	0.0406504	0	0	12	12	0.0769231	0.920147	0	0	2	6.59218	0.131714	0	0	7	10.0978	0.090108	-0.547688	0	0	12	22.7653	0.0420782	-1.64627
TGME49_203330	0	0	0	0	1	0	0	3	3	0.25	-2	0	0	0	0	1	0	0	6	8.65526	0.103571	-3.27131	0	0	0	0	1	0
TGME49_203340	0	0	1	1.31111	0.432692	0	0	5	5	0.166667	-1.37638	0	0	0	0	1	0	0	0	0	1	0	0	0	0	0	1	0
TGME49_203350	0	0	14	18.3556	0.0516648	0	0	7	7	0.125	1.27468	0	0	10	32.9609	0.0294456	0	0	6	8.65526	0.103571	1.81449	0	0	11	20.8682	0.0457286	0.635042
TGME49_203358	0	0	10	13.1111	0.0708661	0	0	17	17	0.0555556	-0.351165	0	0	5	16.4804	0.0572068	0	0	10	14.4254	0.064828	0.180432	0	0	7	13.2797	0.0700293	0.291772
TGME49_203362	0	0	10	13.1111	0.0708661	0	0	18	18	0.0526316	-0.429168	0	0	5	16.4804	0.0572068	0	0	11	15.868	0.059284	0.0514557	0	0	7	13.2797	0.0700293	0.291772
TGME49_203370	0	0	23	30.1556	0.032097	1	1	26	26	0.0740741	1.20653	0	0	5	16.4804	0.0572068	2	2.88509	26	37.5061	0.100895	0.818601	0	0	13	24.6624	0.0389675	-0.553913
TGME49_203375	0	0	0	0	1	1	1	2	2	0.666667	-0.584963	0	0	1	3.29609	0.23277	2	2.88509	1	1.44254	1.59059	2.77259	0	0	0	0	1	2.10302
TGME49_203380	0	0	29	38.0222	0.0256264	0	0	32	32	0.030303	0.24183	0	0	12	39.5531	0.024659	0	0	16	23.0807	0.0415271	0.751935	0	0	21	39.8392	0.0244863	-0.0101444
TGME49_203390	0	0	33	43.2667	0.0225904	0	0	37	37	0.0263158	0.220221	0	0	7	23.0726	0.041541	0	0	21	30.2934	0.0319556	-0.378465	0	0	24	45.5305	0.0214913	-0.950785
TGME49_203400	0	0	20	26.2222	0.0367347	0	0	24	24	0.04	0.122857	0	0	3	9.88827	0.091842	0	0	20	28.8509	0.0334999	-1.455	0	0	11	20.8682	0.0457286	-1.00606
TGME49_203420	0	0	1	1.31111	0.432692	0	0	0	0	1	1.20859	0	0	2	6.59218	0.131714	0	0	1	1.44254	0.409409	1.63613	0	0	1	1.89711	0.345172	1.3899
TGME49_203430	0	0	2	2.62222	0.276074	1	1	2	2	0.666667	1.27191	2	6.59218	2	6.59218	1	1	1.44254	2	2.88509	0.628697	-0.669563	0	0	2	3.79421	0.208585	-2.26129
TGME49_203440	0	0	2	2.62222	0.276074	1	1	2	2	0.666667	1.27191	2	6.59218	3	9.88827	0.697281	1	1.44254	3	4.32763	0.458467	-0.604921	0	0	2	3.79421	0.208585	-1.74111
TGME49_203450	0	0	12	15.7333	0.059761	0	0	5	5	0.166667	1.47969	0	0	3	9.88827	0.091842	0	0	5	7.21271	0.121762	0.406844	0	0	11	20.8682	0.0457286	-1.00606
TGME49_203460	0	0	8	10.4889	0.0870406	0	0	3	3	0.25	1.52217	0	0	2	6.59218	0.131714	0	0	8	11.5403	0.0797426	-0.723991	0	0	5	9.48553	0.0953695	-0.465814
TGME49_203470	0	0	0	0	1	0	0	0	0	1	0	0	0	0	0	1	0	0	0	0	1	0	0	0	0	0	1	0
TGME49_203480	0	0	2	2.62222	0.276074	0	0	5	5	0.166667	-0.728087	0	0	0	0	1	0	0	3	4.32763	0.187701	-2.41349	0	0	1	1.89711	0.345172	-1.53461
TGME49_203490	0	0	17	22.2889	0.0429389	0	0	18	18	0.0526316	0.293642	0	0	8	26.3687	0.0365381	0	0	15	21.6381	0.0441732	0.273772	0	0	12	22.7653	0.0420782	0.203673
TGME49_203500	0	0	0	0	1	0	0	0	0	1	0	0	0	0	0	1	0	0	0	0	1	0	0	0	0	0	1	0
TGME49_203505	0	0	0	0	1	0	0	0	0	1	0	0	0	1	3.29609	0.23277	0	0	0	0	1	2.10302	0	0	0	0	1	2.10302
TGME49_203510	0	0	15	19.6667	0.0483871	0	0	22	22	0.0434783	-0.154328	0	0	6	19.7765	0.0481312	0	0	11	15.868	0.059284	0.300669	0	0	11	20.8682	0.0457286	-0.0738772
TGME49_203520	0	0	9	11.8	0.078125	0	0	14	14	0.0666667	-0.228819	0	0	3	9.88827	0.091842	0	0	3	4.32763	0.187701	1.03121	0	0	9	17.074	0.0553282	-0.731138
TGME49_203540	9	11.8	16	20.9778	0.582406	16	16	30	30	0.548387	-0.0868318	13	42.8492	7	23.0726	1.82154	21	30.2934	13	18.7531	1.58423	-0.201373	9	17.074	10	18.9711	0.905007	-1.00915
TGME49_203560	9	11.8	18	23.6	0.520325	16	16	25	25	0.653846	0.329538	13	42.8492	5	16.4804	2.50847	21	30.2934	14	20.1956	1.47641	-0.764714	9	17.074	10	18.9711	0.905007	-1.47081
TGME49_203570	0	0	3	3.93333	0.202703	1	1	4	4	0.4	0.980635	0	0	0	0	1	1	1.44254	1	1.44254	1	0	0	0	3	5.69132	0.149447	-2.74229
TGME49_203580	0	0	3	3.93333	0.202703	1	1	5	5	0.333333	0.7176	0	0	0	0	1	1	1.44254	2	2.88509	0.628697	-0.669563	0	0	3	5.69132	0.149447	-2.74229
TGME49_203590	0	0	0	0	1	0	0	0	0	1	0	0	0	0	0	1	0	0	0	0	1	0	0	0	0	0	1	0
TGME49_203600	0	0	48	62.9333	0.0156413	0	0	42	42	0.0232558	0.572232	0	0	18	59.3296	0.0165756	0	0	43	62.0293	0.0158656	-0.0631573	0	0	34	64.5016	0.0152668	-0.118664
TGME49_203610	0	0	20	26.2222	0.0367347	0	0	22	22	0.0434783	0.243151	0	0	9	29.6648	0.0326107	0	0	18	25.9658	0.0370841	0.185455	0	0	12	22.7653	0.0420782	0.367729
TGME49_203620	0	0	10	13.1111	0.0708661	0	0	10	10	0.0909091	0.359328	0	0	3	9.88827	0.091842	0	0	13	18.7531	0.0506251	-0.859301	0	0	8	15.1768	0.0618167	-0.571156
TGME49_203630	0	0	1667	2185.62	0.000457326	0	0	2527	2527	0.00039557	-0.209292	0	0	619	2040.28	0.000489889	0	0	1609	2321.05	0.000430654	-0.185926	0	0	1130	2143.73	0.000466259	-0.0713224
TGME49_203665	0	0	7	9.17778	0.0982533	0	0	2	2	0.333333	1.76239	0	0	2	6.59218	0.131714	0	0	3	4.32763	0.187701	0.511021	0	0	6	11.3826	0.0807582	-0.705733
TGME49_203682	0	0	0	0	1	0	0	0	0	1	0	0	0	1	3.29609	0.23277	0	0	0	0	1	2.10302	0	0	0	0	1	2.10302
TGME49_203685	0	0	0	0	1	0	0	0	0	1	0	0	0	1	3.29609	0.23277	0	0	1	1.44254	0.409409	0.81464	0	0	0	0	1	2.10302
TGME49_203688	0	0	0	0	1	0	0	0	0	1	0	0	0	1	3.29609	0.23277	0	0	1	1.44254	0.409409	0.81464	0	0	0	0	1	2.10302
TGME49_203690	0	0	20	26.2222	0.0367347	0	0	22	22	0.0434783	0.243151	0	0	7	23.0726	0.041541	0	0	9	12.9829	0.071516	0.783731	0	0	13	24.6624	0.0389675	-0.0922614
TGME49_203700	0	0	58	76.0444	0.0129795	0	0	55	55	0.0178571	0.460264	0	0	18	59.3296	0.0165756	0	0	36	51.9315	0.0188923	0.188739	0	0	34	64.5016	0.0152668	-0.118664
TGME49_203705	0	0	1	1.31111	0.432692	0	0	1	1	0.5	0.208587	0	0	0	0	1	0	0	0	0	1	0	0	0	1	1.89711	0.345172	-1.53461
TGME49_203710	0	0	33	43.2667	0.0225904	0	0	23	23	0.0416667	0.883186	0	0	11	36.257	0.0268406	0	0	15	21.6381	0.0441732	0.718755	0	0	22	41.7363	0.0233993	-0.197952
TGME49_203720	0	0	30	39.3333	0.0247934	0	0	87	87	0.0113636	-1.12553	0	0	2	6.59218	0.131714	0	0	22	31.7359	0.0305475	-2.10829	0	0	15	28.4566	0.0339483	-1.956
TGME49_203730	1	1.31111	14	18.3556	0.119403	0	0	18	18	0.0526316	-1.18184	2	6.59218	7	23.0726	0.315386	2	2.88509	12	17.3105	0.212178	-0.571846	1	1.89711	9	17.074	0.160292	-0.97642
TGME49_203735	1	1.31111	1	1.31111	1	0	0	0	0	1	0	2	6.59218	1	3.29609	1.76723	2	2.88509	2	2.88509	1	-0.82149	1	1.89711	1	1.89711	1	-0.82149
TGME49_203740	0	0	22	28.8444	0.0335071	0	0	21	21	0.0454545	0.439959	0	0	6	19.7765	0.0481312	0	0	11	15.868	0.059284	0.300669	0	0	15	28.4566	0.0339483	-0.503635
TGME49_203750	0	0	6	7.86667	0.112782	0	0	2	2	0.333333	1.56343	0	0	4	13.1844	0.0705002	0	0	3	4.32763	0.187701	1.41274	0	0	3	5.69132	0.149447	1.08394
TGME49_203760	0	0	8	10.4889	0.0870406	0	0	11	11	0.0833333	-0.0627951	0	0	1	3.29609	0.23277	0	0	5	7.21271	0.121762	-0.934835	0	0	6	11.3826	0.0807582	-1.52722
TGME49_203770	0	0	0	0	1	0	0	2	2	0.333333	-1.58496	0	0	0	0	1	0	0	1	1.44254	0.409409	-1.28838	0	0	0	0	1	0
TGME49_203780	0	0	12	15.7333	0.059761	0	0	22	22	0.0434783	-0.458909	0	0	5	16.4804	0.0572068	0	0	6	8.65526	0.103571	0.856356	0	0	8	15.1768	0.0618167	0.111811
TGME49_203790	0	0	112	146.844	0.00676387	0	0	169	169	0.00588235	-0.201455	0	0	45	148.324	0.00669685	0	0	124	178.875	0.00555941	-0.268551	0	0	74	140.386	0.00707284	0.0788085
TGME49_203800	0	0	0	0	1	0	0	0	0	1	0	0	0	0	0	1	0	0	0	0	1	0	0	0	0	0	1	0
TGME49_203810	0	0	25	32.7778	0.0296053	0	0	19	19	0.05	0.756074	0	0	9	29.6648	0.0326107	0	0	15	21.6381	0.0441732	0.437828	0	0	16	30.3537	0.0318942	-0.0320518
TGME49_203815	0	0	48	62.9333	0.0156413	0	0	103	103	0.00961538	-0.701943	0	0	12	39.5531	0.024659	0	0	110	158.68	0.00626254	-1.9773	0	0	27	51.2219	0.0191491	-0.364843
TGME49_203820	0	0	36	47.2	0.0207469	0	0	23	23	0.0416667	1.006	0	0	16	52.7374	0.018609	0	0	22	31.7359	0.0305475	0.715052	0	0	24	45.5305	0.0214913	0.207749
TGME49_203830	0	0	7	9.17778	0.0982533	0	0	7	7	0.125	0.347351	0	0	3	9.88827	0.091842	0	0	5	7.21271	0.121762	0.406844	0	0	5	9.48553	0.0953695	0.0543746
TGME49_203840	0	0	4	5.24444	0.160142	0	0	5	5	0.166667	0.0576107	0	0	2	6.59218	0.131714	0	0	5	7.21271	0.121762	-0.113345	0	0	2	3.79421	0.208585	0.66322
TGME49_203860	0	0	2	2.62222	0.276074	0	0	8	8	0.111111	-1.31305	0	0	4	13.1844	0.0705002	0	0	9	12.9829	0.071516	0.0206387	0	0	2	3.79421	0.208585	1.56494
TGME49_203870	0	0	15	19.6667	0.0483871	0	0	29	29	0.0333333	-0.537657	0	0	12	39.5531	0.024659	0	0	11	15.868	0.059284	1.26552	0	0	12	22.7653	0.0420782	0.770956
TGME49_203875	0	0	1	1.31111	0.432692	0	0	2	2	0.333333	-0.376376	0	0	0	0	1	0	0	0	0	1	0	0	0	1	1.89711	0.345172	-1.53461
TGME49_203880	0	0	13	17.0444	0.0554187	0	0	13	13	0.0714286	0.366128	0	0	4	13.1844	0.0705002	1	1.44254	12	17.3105	0.133396	0.920012	0	0	10	18.9711	0.0500725	-0.49361
TGME49_203890	0	0	3	3.93333	0.202703	0	0	6	6	0.142857	-0.504792	0	0	0	0	1	1	1.44254	5	7.21271	0.29741	-1.74948	0	0	3	5.69132	0.149447	-2.74229
TGME49_203900	0	0	1	1.31111	0.432692	0	0	2	2	0.333333	-0.376376	0	0	0	0	1	0	0	1	1.44254	0.409409	-1.28838	0	0	1	1.89711	0.345172	-1.53461
TGME49_203910	0	0	22	28.8444	0.0335071	0	0	17	17	0.0555556	0.729465	0	0	7	23.0726	0.041541	0	0	14	20.1956	0.0471796	0.183629	0	0	13	24.6624	0.0389675	-0.0922614
TGME49_203930	0	0	63	82.6	0.0119617	0	0	55	55	0.0178571	0.578076	0	0	5	16.4804	0.0572068	0	0	10	14.4254	0.064828	0.180432	0	0	47	89.164	0.0110909	-2.36681
TGME49_203940	0	0	2	2.62222	0.276074	0	0	3	3	0.25	-0.143125	0	0	1	3.29609	0.23277	0	0	1	1.44254	0.409409	0.81464	0	0	1	1.89711	0.345172	0.568411
TGME49_203950	0	0	17	22.2889	0.0429389	0	0	11	11	0.0833333	0.956607	0	0	0	0	1	0	0	2	2.88509	0.257395	-1.95795	0	0	8	15.1768	0.0618167	-4.01586
TGME49_203960	0	0	7	9.17778	0.0982533	0	0	6	6	0.142857	0.539996	0	0	5	16.4804	0.0572068	0	0	13	18.7531	0.0506251	-0.176334	0	0	4	7.58842	0.116436	1.02528
TGME49_203970	0	0	6	7.86667	0.112782	0	0	13	13	0.0714286	-0.658963	0	0	5	16.4804	0.0572068	0	0	8	11.5403	0.0797426	0.479165	0	0	3	5.69132	0.149447	1.38538
TGME49_203980	0	0	34	44.5778	0.0219405	0	0	40	40	0.0243902	0.152707	0	0	10	32.9609	0.0294456	0	0	36	51.9315	0.0188923	-0.640253	0	0	27	51.2219	0.0191491	-0.62078
TGME49_203985	0	0	0	0	1	0	0	0	0	1	0	0	0	1	3.29609	0.23277	0	0	5	7.21271	0.121762	-0.934835	0	0	0	0	1	2.10302
TGME49_203990	0	0	151	197.978	0.00502569	0	0	144	144	0.00689655	0.456554	0	0	50	164.804	0.0060312	1	1.44254	98	141.369	0.0171564	1.50823	0	0	99	187.814	0.00529623	-0.187479
TGME49_204000	0	0	0	0	1	0	0	1	1	0.5	-1	0	0	0	0	1	4	5.77017	5	7.21271	0.824352	-0.278667	0	0	0	0	1	0
TGME49_204010	0	0	4	5.24444	0.160142	0	0	2	2	0.333333	1.05761	0	0	0	0	1	4	5.77017	9	12.9829	0.484176	-1.0464	0	0	2	3.79421	0.208585	-2.26129
TGME49_204020	0	0	1710	2242	0.000445831	0	0	2263	2263	0.000441696	-0.0134443	0	0	650	2142.46	0.000466536	0	0	1642	2368.66	0.000422002	-0.144737	0	0	1178	2234.79	0.000447269	-0.0608451
TGME49_204040	0	0	10	13.1111	0.0708661	4	4	16	16	0.294118	2.05322	0	0	3	9.88827	0.091842	7	10.0978	11	15.868	0.657921	2.84069	0	0	6	11.3826	0.0807582	-0.185544
TGME49_204045	0	0	15	19.6667	0.0483871	4	4	17	17	0.277778	2.52124	0	0	3	9.88827	0.091842	7	10.0978	12	17.3105	0.606089	2.7223	0	0	10	18.9711	0.0500725	-0.875136
TGME49_204050	1	1.31111	397	520.511	0.00443157	0	0	522	522	0.00191205	-1.2127	1	3.29609	179	590	0.00726919	0	0	261	376.504	0.00264898	-1.45636	1	1.89711	278	527.395	0.00548284	-0.406872
TGME49_204055	12	15.7333	21	27.5333	0.586449	10	10	15	15	0.6875	0.229355	15	49.4413	12	39.5531	1.24384	19	27.4083	12	17.3105	1.55148	0.318846	12	22.7653	17	32.2508	0.714728	-0.79933
TGME49_204060	11	14.4222	17	22.2889	0.662214	10	10	13	13	0.785714	0.246708	14	46.1453	4	13.1844	3.32375	19	27.4083	10	14.4254	1.84165	-0.851809	11	20.8682	13	24.6624	0.852149	-1.96363
TGME49_204070	0	0	8	10.4889	0.0870406	0	0	9	9	0.1	0.200239	0	0	4	13.1844	0.0705002	0	0	9	12.9829	0.071516	0.0206387	0	0	7	13.2797	0.0700293	-0.00966918
TGME49_204080	0	0	13	17.0444	0.0554187	0	0	22	22	0.0434783	-0.350079	0	0	1	3.29609	0.23277	0	0	15	21.6381	0.0441732	-2.39766	0	0	7	13.2797	0.0700293	-1.73287
TGME49_204090	0	0	1	1.31111	0.432692	0	0	1	1	0.5	0.208587	0	0	0	0	1	0	0	0	0	1	0	0	0	1	1.89711	0.345172	-1.53461
TGME49_204100	0	0	5	6.55556	0.132353	1	1	4	4	0.4	1.59561	0	0	0	0	1	5	7.21271	6	8.65526	0.850595	-0.233456	0	0	3	5.69132	0.149447	-2.74229
TGME49_204110	0	0	15	19.6667	0.0483871	1	1	14	14	0.133333	1.46234	0	0	5	16.4804	0.0572068	5	7.21271	9	12.9829	0.58734	3.35994	0	0	12	22.7653	0.0420782	-0.443113
TGME49_204120	0	0	1	1.31111	0.432692	0	0	3	3	0.25	-0.791413	0	0	1	3.29609	0.23277	0	0	2	2.88509	0.257395	0.145078	0	0	1	1.89711	0.345172	0.568411
TGME49_204130	0	0	128	167.822	0.00592339	0	0	235	235	0.00423729	-0.483282	0	0	64	210.95	0.0047181	0	0	123	177.433	0.00560435	0.248342	0	0	88	166.945	0.00595432	0.33573
TGME49_204140	0	0	1	1.31111	0.432692	0	0	4	4	0.2	-1.11334	0	0	1	3.29609	0.23277	0	0	2	2.88509	0.257395	0.145078	0	0	1	1.89711	0.345172	0.568411
TGME49_204150	0	0	0	0	1	1	1	2	2	0.666667	-0.584963	1	3.29609	1	3.29609	1	1	1.44254	0	0	2.44254	1.28838	0	0	0	0	1	0
TGME49_204160	0	0	25	32.7778	0.0296053	1	1	33	33	0.0588235	0.99054	1	3.29609	14	46.1453	0.0911245	1	1.44254	14	20.1956	0.115238	0.338708	0	0	15	28.4566	0.0339483	-1.4245
TGME49_204270	0	0	38	49.8222	0.0196764	0	0	34	34	0.0285714	0.538105	0	0	14	46.1453	0.021211	0	0	28	40.3912	0.0241597	0.187788	0	0	24	45.5305	0.0214913	0.0189343
TGME49_204280	0	0	19	24.9111	0.0385935	0	0	26	26	0.037037	-0.0593885	0	0	11	36.257	0.0268406	0	0	10	14.4254	0.064828	1.2722	0	0	15	28.4566	0.0339483	0.33892
TGME49_204290	0	0	0	0	1	0	0	0	0	1	0	0	0	0	0	1	0	0	0	0	1	0	0	0	0	0	1	0
TGME49_204300	0	0	1	1.31111	0.432692	0	0	0	0	1	1.20859	0	0	0	0	1	0	0	0	0	1	0	0	0	1	1.89711	0.345172	-1.53461
TGME49_204310	0	0	45	59	0.0166667	3	3	53	53	0.0740741	2.152	0	0	18	59.3296	0.0165756	3	4.32763	33	47.6039	0.109613	2.72529	0	0	32	60.7074	0.0162055	-0.0325772
TGME49_204315	0	0	0	0	1	3	3	3	3	1	0	0	0	1	3.29609	0.23277	3	4.32763	0	0	5.32763	4.51652	0	0	0	0	1	2.10302
TGME49_204320	0	0	22	28.8444	0.0335071	1	1	27	27	0.0714286	1.09204	0	0	3	9.88827	0.091842	1	1.44254	7	10.0978	0.220093	1.26088	0	0	16	30.3537	0.0318942	-1.52586
TGME49_204325	2	2.62222	2	2.62222	1	7	7	7	7	1	0	2	6.59218	0	0	7.59218	18	25.9658	19	27.4083	0.949221	-2.9997	2	3.79421	1	1.89711	1.65483	-2.19783
TGME49_204330	2	2.62222	9	11.8	0.282986	7	7	17	17	0.444444	0.651272	2	6.59218	8	26.3687	0.277404	18	25.9658	19	27.4083	0.949221	1.77476	2	3.79421	7	13.2797	0.335735	0.275338
TGME49_204340	0	0	74	97.0222	0.0102018	0	0	117	117	0.00847458	-0.267606	0	0	36	118.659	0.00835707	0	0	117	168.778	0.00589006	-0.504714	0	0	51	96.7524	0.0102299	0.291727
TGME49_204350	0	0	6	7.86667	0.112782	0	0	6	6	0.142857	0.341037	0	0	3	9.88827	0.091842	0	0	9	12.9829	0.071516	-0.360888	0	0	5	9.48553	0.0953695	0.0543746
TGME49_204360	0	0	7	9.17778	0.0982533	0	0	29	29	0.0333333	-1.55954	0	0	3	9.88827	0.091842	0	0	5	7.21271	0.121762	0.406844	0	0	6	11.3826	0.0807582	-0.185544
TGME49_204370	0	0	49	64.2444	0.015327	0	0	98	98	0.010101	-0.601573	0	0	22	72.514	0.0136029	0	0	79	113.961	0.00869861	-0.645053	0	0	35	66.3987	0.0148371	0.125297
TGME49_204380	0	0	15	19.6667	0.0483871	0	0	12	12	0.0769231	0.668794	0	0	10	32.9609	0.0294456	0	0	12	17.3105	0.0546134	0.891202	0	0	10	18.9711	0.0500725	0.765963
TGME49_204390	0	0	0	0	1	0	0	0	0	1	0	0	0	1	3.29609	0.23277	0	0	1	1.44254	0.409409	0.81464	0	0	0	0	1	2.10302
TGME49_204395	0	0	0	0	1	3	3	10	10	0.363636	-1.45943	0	0	0	0	1	3	4.32763	0	0	5.32763	2.41349	0	0	0	0	1	0
TGME49_204400	0	0	244	319.911	0.00311613	3	3	263	263	0.0151515	2.28164	0	0	79	260.391	0.00382569	3	4.32763	219	315.917	0.0168108	2.1356	0	0	150	284.566	0.00350182	-0.127614
TGME49_204410	0	0	10	13.1111	0.0708661	0	0	21	21	0.0454545	-0.640672	0	0	4	13.1844	0.0705002	0	0	13	18.7531	0.0506251	-0.477775	0	0	7	13.2797	0.0700293	-0.00966918
TGME49_204420	0	0	0	0	1	0	0	0	0	1	0	0	0	0	0	1	0	0	0	0	1	0	0	0	0	0	1	0
TGME49_204440	0	0	3	3.93333	0.202703	0	0	7	7	0.125	-0.697437	0	0	0	0	1	0	0	2	2.88509	0.257395	-1.95795	0	0	3	5.69132	0.149447	-2.74229
TGME49_204460	0	0	0	0	1	0	0	0	0	1	0	0	0	0	0	1	0	0	0	0	1	0	0	0	0	0	1	0
TGME49_204468	0	0	0	0	1	0	0	0	0	1	0	0	0	0	0	1	0	0	0	0	1	0	0	0	0	0	1	0
TGME49_204472	0	0	0	0	1	0	0	0	0	1	0	0	0	0	0	1	0	0	0	0	1	0	0	0	0	0	1	0
TGME49_204480	0	0	63	82.6	0.0119617	0	0	66	66	0.0149254	0.319342	0	0	31	102.179	0.00969192	1	1.44254	26	37.5061	0.0634326	2.71037	0	0	35	66.3987	0.0148371	0.614353
TGME49_204490	0	0	4	5.24444	0.160142	0	0	16	16	0.0588235	-1.44489	0	0	2	6.59218	0.131714	1	1.44254	12	17.3105	0.133396	0.0182975	0	0	2	3.79421	0.208585	0.66322
TGME49_204500	0	0	5	6.55556	0.132353	0	0	6	6	0.142857	0.110183	0	0	2	6.59218	0.131714	0	0	6	8.65526	0.103571	-0.346801	0	0	2	3.79421	0.208585	0.66322
TGME49_204505	0	0	1	1.31111	0.432692	0	0	0	0	1	1.20859	0	0	0	0	1	0	0	0	0	1	0	0	0	1	1.89711	0.345172	-1.53461
TGME49_204510	0	0	24	31.4667	0.0308008	0	0	34	34	0.0285714	-0.108396	0	0	9	29.6648	0.0326107	0	0	21	30.2934	0.0319556	-0.0292746	0	0	14	26.5595	0.0362851	0.154035
TGME49_204520	0	0	2	2.62222	0.276074	1	1	14	14	0.133333	-1.05002	0	0	0	0	1	1	1.44254	3	4.32763	0.458467	-1.12511	0	0	2	3.79421	0.208585	-2.26129
TGME49_204530	0	0	1373	1800.16	0.000555199	1	1	2407	2407	0.000830565	0.581087	0	0	504	1661.23	0.000601602	1	1.44254	1628	2348.46	0.00103962	0.789174	0	0	941	1785.18	0.000559855	-0.103756
TGME49_204540	0	0	8	10.4889	0.0870406	0	0	4	4	0.2	1.20024	0	0	1	3.29609	0.23277	0	0	4	5.77017	0.147707	-0.656168	0	0	3	5.69132	0.149447	-0.639266
TGME49_204550	0	0	2	2.62222	0.276074	0	0	22	22	0.0434783	-2.66669	0	0	0	0	1	0	0	11	15.868	0.059284	-4.07621	0	0	2	3.79421	0.208585	-2.26129
TGME49_204560	0	0	0	0	1	0	0	0	0	1	0	0	0	0	0	1	0	0	2	2.88509	0.257395	-1.95795	0	0	0	0	1	0
TGME49_204870	0	0	0	0	1	0	0	0	0	1	0	0	0	0	0	1	0	0	0	0	1	0	0	0	0	0	1	0
TGME49_204880	0	0	18	23.6	0.0406504	0	0	31	31	0.03125	-0.379414	0	0	6	19.7765	0.0481312	0	0	12	17.3105	0.0546134	0.182283	0	0	10	18.9711	0.0500725	0.0570442
TGME49_205000	0	0	13	17.0444	0.0554187	0	0	14	14	0.0666667	0.266592	0	0	4	13.1844	0.0705002	0	0	19	27.4083	0.035201	-1.00201	0	0	9	17.074	0.0553282	-0.349611
TGME49_205010	0	0	34	44.5778	0.0219405	5	5	50	50	0.117647	2.4228	0	0	12	39.5531	0.024659	7	10.0978	29	41.8337	0.25909	3.39327	0	0	23	43.6334	0.0224047	-0.138314
TGME49_205020	0	0	0	0	1	5	5	12	12	0.461538	-1.11548	0	0	2	6.59218	0.131714	7	10.0978	5	7.21271	1.3513	3.35886	0	0	0	0	1	2.92451
TGME49_205030	0	0	29	38.0222	0.0256264	0	0	41	41	0.0238095	-0.106093	0	0	11	36.257	0.0268406	0	0	32	46.1614	0.0212038	-0.340095	0	0	17	32.2508	0.0300745	0.164122
TGME49_205040	0	0	28	36.7111	0.0265174	1	1	30	30	0.0645161	1.28272	0	0	11	36.257	0.0268406	1	1.44254	16	23.0807	0.101432	1.91802	0	0	16	30.3537	0.0318942	0.248875
TGME49_205050	0	0	0	0	1	1	1	5	5	0.333333	-1.58496	0	0	0	0	1	1	1.44254	3	4.32763	0.458467	-1.12511	0	0	0	0	1	0
TGME49_205060	0	0	12	15.7333	0.059761	0	0	19	19	0.05	-0.257275	0	0	9	29.6648	0.0326107	0	0	13	18.7531	0.0506251	0.634508	0	0	7	13.2797	0.0700293	1.10261
TGME49_205070	0	0	0	0	1	0	0	0	0	1	0	0	0	0	0	1	0	0	5	7.21271	0.121762	-3.03786	0	0	0	0	1	0
TGME49_205080	0	0	0	0	1	0	0	0	0	1	0	0	0	0	0	1	0	0	0	0	1	0	0	0	0	0	1	0
TGME49_205090	0	0	0	0	1	0	0	0	0	1	0	0	0	0	0	1	0	0	0	0	1	0	0	0	0	0	1	0
TGME49_205100	2	2.62222	4	5.24444	0.580071	7	7	17	17	0.444444	-0.384227	4	13.1844	4	13.1844	1	11	15.868	9	12.9829	1.20633	0.270624	2	3.79421	2	3.79421	1	0
TGME49_205110	2	2.62222	8	10.4889	0.31528	7	7	13	13	0.571429	0.857937	4	13.1844	3	9.88827	1.30272	11	15.868	8	11.5403	1.3451	0.0461834	2	3.79421	6	11.3826	0.387172	-1.75048
TGME49_205120	0	0	0	0	1	0	0	0	0	1	0	0	0	0	0	1	0	0	3	4.32763	0.187701	-2.41349	0	0	0	0	1	0
TGME49_205130	0	0	36	47.2	0.0207469	0	0	53	53	0.0185185	-0.163926	0	0	8	26.3687	0.0365381	0	0	27	38.9487	0.0250321	-0.545619	0	0	27	51.2219	0.0191491	-0.932126
TGME49_205140	0	0	0	0	1	0	0	2	2	0.333333	-1.58496	0	0	0	0	1	1	1.44254	5	7.21271	0.29741	-1.74948	0	0	0	0	1	0
TGME49_205150	0	0	12	15.7333	0.059761	0	0	11	11	0.0833333	0.47969	0	0	4	13.1844	0.0705002	1	1.44254	14	20.1956	0.115238	0.70892	0	0	10	18.9711	0.0500725	-0.49361
TGME49_205160	0	0	2	2.62222	0.276074	0	0	6	6	0.142857	-0.95048	0	0	0	0	1	1	1.44254	10	14.4254	0.158345	-2.65885	0	0	1	1.89711	0.345172	-1.53461
TGME49_205170	0	0	66	86.5333	0.0114242	0	0	104	104	0.00952381	-0.262485	0	0	24	79.1061	0.0124834	1	1.44254	80	115.403	0.0209834	0.749235	0	0	39	73.9871	0.0133356	0.0952698
TGME49_205180	0	0	117	153.4	0.00647668	0	0	129	129	0.00769231	0.248161	0	0	42	138.436	0.00717176	0	0	98	141.369	0.00702399	-0.0300365	0	0	80	151.768	0.00654585	-0.131746
TGME49_205190	0	0	3	3.93333	0.202703	0	0	11	11	0.0833333	-1.2824	0	0	3	9.88827	0.091842	0	0	2	2.88509	0.257395	1.48676	0	0	1	1.89711	0.345172	1.91009
TGME49_205200	0	0	3	3.93333	0.202703	0	0	13	13	0.0714286	-1.50479	0	0	3	9.88827	0.091842	0	0	5	7.21271	0.121762	0.406844	0	0	2	3.79421	0.208585	1.18341
TGME49_205210	0	0	3	3.93333	0.202703	0	0	2	2	0.333333	0.7176	0	0	0	0	1	0	0	1	1.44254	0.409409	-1.28838	0	0	2	3.79421	0.208585	-2.26129
TGME49_205220	0	0	11	14.4222	0.0648415	0	0	9	9	0.1	0.625011	0	0	5	16.4804	0.0572068	0	0	11	15.868	0.059284	0.0514557	0	0	9	17.074	0.0553282	-0.0481702
TGME49_205230	0	0	0	0	1	0	0	0	0	1	0	0	0	0	0	1	0	0	1	1.44254	0.409409	-1.28838	0	0	0	0	1	0
TGME49_205240	1	1.31111	8	10.4889	0.201161	5	5	13	13	0.428571	1.09119	1	3.29609	3	9.88827	0.394561	7	10.0978	5	7.21271	1.3513	1.77602	1	1.89711	7	13.2797	0.202882	-0.959607
TGME49_205250	1	1.31111	427	559.844	0.00412077	5	5	434	434	0.0137931	1.74296	1	3.29609	164	540.559	0.00793282	7	10.0978	293	422.665	0.0261947	1.72337	1	1.89711	280	531.19	0.00544375	-0.543234
TGME49_205265	0	0	0	0	1	0	0	0	0	1	0	0	0	0	0	1	0	0	0	0	1	0	0	0	0	0	1	0
TGME49_205280	0	0	45	59	0.0166667	0	0	88	88	0.011236	-0.568843	0	0	15	49.4413	0.019825	0	0	44	63.4719	0.0155106	-0.354063	0	0	32	60.7074	0.0162055	-0.290837
TGME49_205290	0	0	20	26.2222	0.0367347	0	0	36	36	0.027027	-0.44274	0	0	10	32.9609	0.0294456	0	0	13	18.7531	0.0506251	0.781799	0	0	14	26.5595	0.0362851	0.301325
TGME49_205300	0	0	17	22.2889	0.0429389	0	0	18	18	0.0526316	0.293642	0	0	3	9.88827	0.091842	0	0	21	30.2934	0.0319556	-1.52308	0	0	11	20.8682	0.0457286	-1.00606
TGME49_205310	0	0	0	0	1	0	0	0	0	1	0	0	0	0	0	1	0	0	1	1.44254	0.409409	-1.28838	0	0	0	0	1	0
TGME49_205320	0	0	58	76.0444	0.0129795	0	0	91	91	0.0108696	-0.255943	0	0	35	115.363	0.00859379	1	1.44254	61	87.9951	0.0274458	1.67522	0	0	35	66.3987	0.0148371	0.787841
TGME49_205330	0	0	90	118	0.00840336	0	0	155	155	0.00641026	-0.390584	0	0	41	135.14	0.0073454	0	0	108	155.795	0.00637777	-0.203789	0	0	67	127.106	0.00780603	0.0877482
TGME49_205340	0	0	1535	2012.56	0.000496634	0	0	2018	2018	0.000495295	-0.00389563	0	0	559	1842.51	0.000542442	1	1.44254	1304	1881.08	0.00129779	1.25852	0	0	1043	1978.68	0.000505132	-0.10281
TGME49_205350	0	0	80	104.889	0.00944386	0	0	187	187	0.00531915	-0.828181	0	0	39	128.547	0.00771918	0	0	108	155.795	0.00637777	-0.275395	0	0	60	113.826	0.0087088	0.174027
TGME49_205360	0	0	22	28.8444	0.0335071	0	0	25	25	0.0384615	0.198951	0	0	12	39.5531	0.024659	0	0	13	18.7531	0.0506251	1.03774	0	0	14	26.5595	0.0362851	0.557262
TGME49_205370	0	0	20	26.2222	0.0367347	0	0	16	16	0.0588235	0.67925	0	0	7	23.0726	0.041541	0	0	5	7.21271	0.121762	1.55146	0	0	16	30.3537	0.0318942	-0.381242
TGME49_205380	0	0	38	49.8222	0.0196764	0	0	38	38	0.025641	0.381985	0	0	21	69.2179	0.0142414	0	0	40	57.7017	0.0170353	0.258436	0	0	28	53.119	0.0184778	0.375704
TGME49_205390	0	0	13	17.0444	0.0554187	0	0	16	16	0.0588235	0.08602	0	0	4	13.1844	0.0705002	0	0	12	17.3105	0.0546134	-0.368371	0	0	9	17.074	0.0553282	-0.349611
TGME49_205398	0	0	0	0	1	0	0	0	0	1	0	0	0	0	0	1	0	0	0	0	1	0	0	0	0	0	1	0
TGME49_205402	0	0	0	0	1	0	0	0	0	1	0	0	0	0	0	1	1	1.44254	1	1.44254	1	0	0	0	0	0	1	0
TGME49_205410	0	0	4	5.24444	0.160142	0	0	4	4	0.2	0.320645	0	0	0	0	1	1	1.44254	1	1.44254	1	0	0	0	3	5.69132	0.149447	-2.74229
TGME49_205420	0	0	0	0	1	0	0	1	1	0.5	-1	0	0	0	0	1	0	0	1	1.44254	0.409409	-1.28838	0	0	0	0	1	0
TGME49_205425	0	0	0	0	1	0	0	0	0	1	0	0	0	0	0	1	0	0	0	0	1	0	0	0	0	0	1	0
TGME49_205430	0	0	0	0	1	0	0	1	1	0.5	-1	0	0	0	0	1	0	0	0	0	1	0	0	0	0	0	1	0
TGME49_205440	0	0	53	69.4889	0.0141866	1	1	79	79	0.025	0.817396	0	0	29	95.5866	0.0103534	1	1.44254	84	121.174	0.0199924	0.949346	0	0	39	73.9871	0.0133356	0.36518
TGME49_205450	0	0	3	3.93333	0.202703	1	1	4	4	0.4	0.980635	0	0	1	3.29609	0.23277	1	1.44254	2	2.88509	0.628697	1.43346	0	0	3	5.69132	0.149447	-0.639266
TGME49_205460	0	0	20	26.2222	0.0367347	0	0	36	36	0.027027	-0.44274	0	0	20	65.9218	0.0149428	0	0	32	46.1614	0.0212038	0.50487	0	0	11	20.8682	0.0457286	1.61364
TGME49_205470	0	0	588	770.933	0.00129545	0	0	753	753	0.00132626	0.0339117	0	0	222	731.732	0.00136476	0	0	588	848.215	0.00117756	-0.212845	0	0	398	755.048	0.00132267	-0.045193
TGME49_205480	0	0	8	10.4889	0.0870406	1	1	12	12	0.153846	0.821728	0	0	4	13.1844	0.0705002	1	1.44254	4	5.77017	0.36078	2.35542	0	0	7	13.2797	0.0700293	-0.00966918
TGME49_205490	0	0	51	66.8667	0.0147348	1	1	81	81	0.0243902	0.727079	0	0	19	62.6257	0.0157169	1	1.44254	37	53.3741	0.0449211	1.51507	0	0	35	66.3987	0.0148371	-0.0831115
TGME49_205500	0	0	12	15.7333	0.059761	0	0	15	15	0.0625	0.064653	0	0	4	13.1844	0.0705002	0	0	16	23.0807	0.0415271	-0.763576	0	0	7	13.2797	0.0700293	-0.00966918
TGME49_205510	0	0	42	55.0667	0.0178359	0	0	53	53	0.0185185	0.0541839	0	0	20	65.9218	0.0149428	0	0	53	76.4548	0.0129108	-0.210878	0	0	33	62.6045	0.0157222	0.0733471
TGME49_205520	0	0	0	0	1	0	0	1	1	0.5	-1	0	0	0	0	1	0	0	2	2.88509	0.257395	-1.95795	0	0	0	0	1	0
TGME49_205530	0	0	0	0	1	0	0	3	3	0.25	-2	0	0	0	0	1	0	0	5	7.21271	0.121762	-3.03786	0	0	0	0	1	0
TGME49_205540	0	0	11	14.4222	0.0648415	0	0	20	20	0.047619	-0.445379	0	0	5	16.4804	0.0572068	0	0	11	15.868	0.059284	0.0514557	0	0	6	11.3826	0.0807582	0.497424
TGME49_205550	0	0	5	6.55556	0.132353	0	0	8	8	0.111111	-0.252387	0	0	4	13.1844	0.0705002	0	0	3	4.32763	0.187701	1.41274	0	0	2	3.79421	0.208585	1.56494
TGME49_205558	0	0	156	204.533	0.00486539	0	0	170	170	0.00584795	0.265376	0	0	55	181.285	0.00548592	0	0	130	187.531	0.00530418	-0.0486032	0	0	108	204.887	0.00485702	-0.175661
TGME49_205562	0	0	9	11.8	0.078125	0	0	12	12	0.0769231	-0.0223678	0	0	3	9.88827	0.091842	0	0	2	2.88509	0.257395	1.48676	0	0	5	9.48553	0.0953695	0.0543746
TGME49_205570	0	0	13	17.0444	0.0554187	0	0	16	16	0.0588235	0.08602	0	0	2	6.59218	0.131714	0	0	12	17.3105	0.0546134	-1.27009	0	0	10	18.9711	0.0500725	-1.39533
TGME49_205580	0	0	23	30.1556	0.032097	0	0	26	26	0.037037	0.20653	0	0	8	26.3687	0.0365381	0	0	19	27.4083	0.035201	-0.0537855	0	0	17	32.2508	0.0300745	-0.280862
TGME49_205590	0	0	0	0	1	0	0	0	0	1	0	0	0	0	0	1	0	0	0	0	1	0	0	0	0	0	1	0
TGME49_205600	0	0	5	6.55556	0.132353	0	0	9	9	0.1	-0.40439	0	0	1	3.29609	0.23277	0	0	8	11.5403	0.0797426	-1.54548	0	0	4	7.58842	0.116436	-0.999369
TGME49_205615	0	0	2	2.62222	0.276074	0	0	2	2	0.333333	0.271913	0	0	0	0	1	0	0	0	0	1	0	0	0	1	1.89711	0.345172	-1.53461
TGME49_205625	0	0	7	9.17778	0.0982533	0	0	6	6	0.142857	0.539996	0	0	2	6.59218	0.131714	0	0	2	2.88509	0.257395	0.966568	0	0	6	11.3826	0.0807582	-0.705733
TGME49_205630	0	0	0	0	1	0	0	0	0	1	0	0	0	0	0	1	0	0	0	0	1	0	0	0	0	0	1	0
TGME49_205640	0	0	8	10.4889	0.0870406	0	0	12	12	0.0769231	-0.178272	0	0	7	23.0726	0.041541	0	0	6	8.65526	0.103571	1.31801	0	0	7	13.2797	0.0700293	0.753424
TGME49_205650	0	0	73	95.7111	0.0103401	0	0	102	102	0.00970874	-0.0908908	0	0	25	82.4022	0.0119901	0	0	63	90.8802	0.0108837	-0.139668	0	0	50	94.8553	0.0104324	-0.200772
TGME49_205658	0	0	4	5.24444	0.160142	0	0	1	1	0.5	1.64257	0	0	0	0	1	0	0	3	4.32763	0.187701	-2.41349	0	0	3	5.69132	0.149447	-2.74229
TGME49_205662	0	0	20	26.2222	0.0367347	0	0	4	4	0.2	2.44478	0	0	4	13.1844	0.0705002	0	0	5	7.21271	0.121762	0.78837	0	0	15	28.4566	0.0339483	-1.05429
TGME49_205670	0	0	45	59	0.0166667	0	0	31	31	0.03125	0.906891	0	0	10	32.9609	0.0294456	0	0	22	31.7359	0.0305475	0.052999	0	0	32	60.7074	0.0162055	-0.861569
TGME49_205680	0	0	29	38.0222	0.0256264	0	0	48	48	0.0204082	-0.328486	0	0	7	23.0726	0.041541	0	0	23	33.1785	0.0292582	-0.505695	0	0	24	45.5305	0.0214913	-0.950785
TGME49_205690	0	0	32	41.9556	0.0232799	6	6	35	35	0.194444	3.0622	0	0	15	49.4413	0.019825	8	11.5403	25	36.0636	0.338347	4.09311	0	0	18	34.1479	0.0284512	0.521168
TGME49_205700	2	2.62222	1187	1556.29	0.00232598	11	11	1801	1801	0.00665927	1.51753	3	9.88827	486	1601.9	0.00679286	21	30.2934	1189	1715.18	0.0182343	1.42456	2	3.79421	800	1517.68	0.00315682	-1.10555
TGME49_205710	2	2.62222	46	60.3111	0.0590794	5	5	44	44	0.133333	1.17431	3	9.88827	21	69.2179	0.155064	13	18.7531	38	54.8166	0.353892	1.19044	2	3.79421	31	58.8103	0.080157	-0.951964
TGME49_205720	0	0	8	10.4889	0.0870406	0	0	11	11	0.0833333	-0.0627951	0	0	2	6.59218	0.131714	0	0	9	12.9829	0.071516	-0.881076	0	0	5	9.48553	0.0953695	-0.465814
TGME49_205730	0	0	21	27.5333	0.0350467	0	0	27	27	0.0357143	0.0272215	0	0	8	26.3687	0.0365381	0	0	10	14.4254	0.064828	0.827217	0	0	17	32.2508	0.0300745	-0.280862
TGME49_205740	0	0	18	23.6	0.0406504	0	0	21	21	0.0454545	0.161155	0	0	10	32.9609	0.0294456	0	0	24	34.621	0.0280733	-0.0688547	0	0	13	24.6624	0.0389675	0.404219
TGME49_205750	0	0	8	10.4889	0.0870406	0	0	17	17	0.0555556	-0.647758	0	0	10	32.9609	0.0294456	0	0	12	17.3105	0.0546134	0.891202	0	0	6	11.3826	0.0807582	1.45556
TGME49_205760	0	0	0	0	1	0	0	0	0	1	0	0	0	0	0	1	0	0	1	1.44254	0.409409	-1.28838	0	0	0	0	1	0
TGME49_205770	0	0	0	0	1	0	0	0	0	1	0	0	0	0	0	1	0	0	0	0	1	0	0	0	0	0	1	0
TGME49_206290	0	0	1	1.31111	0.432692	0	0	1	1	0.5	0.208587	0	0	0	0	1	0	0	0	0	1	0	0	0	1	1.89711	0.345172	-1.53461
TGME49_206300	0	0	5	6.55556	0.132353	0	0	7	7	0.125	-0.0824622	0	0	3	9.88827	0.091842	0	0	1	1.44254	0.409409	2.15632	0	0	2	3.79421	0.208585	1.18341
TGME49_206310	0	0	13	17.0444	0.0554187	0	0	4	4	0.2	1.85155	0	0	2	6.59218	0.131714	0	0	9	12.9829	0.071516	-0.881076	0	0	7	13.2797	0.0700293	-0.911384
TGME49_206320	0	0	22	28.8444	0.0335071	0	0	34	34	0.0285714	-0.229893	0	0	15	49.4413	0.019825	0	0	25	36.0636	0.0269807	0.444605	0	0	15	28.4566	0.0339483	0.776016
TGME49_206330	0	0	6	7.86667	0.112782	0	0	14	14	0.0666667	-0.758499	0	0	5	16.4804	0.0572068	0	0	7	10.0978	0.090108	0.655468	0	0	3	5.69132	0.149447	1.38538
TGME49_206340	0	0	118	154.711	0.00642215	0	0	219	219	0.00454545	-0.498632	0	0	79	260.391	0.00382569	0	0	147	212.054	0.00469365	0.294992	0	0	88	166.945	0.00595432	0.638218
TGME49_206350	0	0	59	77.3556	0.0127623	0	0	67	67	0.0147059	0.204501	0	0	27	88.9944	0.0111118	0	0	51	73.5697	0.0134103	0.271246	0	0	43	81.5756	0.0121101	0.124121
TGME49_206360	0	0	6	7.86667	0.112782	0	0	9	9	0.1	-0.173536	0	0	2	6.59218	0.131714	0	0	6	8.65526	0.103571	-0.346801	0	0	5	9.48553	0.0953695	-0.465814
TGME49_206380	0	0	8	10.4889	0.0870406	0	0	29	29	0.0333333	-1.38472	0	0	3	9.88827	0.091842	0	0	8	11.5403	0.0797426	-0.203802	0	0	6	11.3826	0.0807582	-0.185544
TGME49_206390	0	0	18	23.6	0.0406504	0	0	15	15	0.0625	0.620586	0	0	1	3.29609	0.23277	0	0	13	18.7531	0.0506251	-2.20098	0	0	11	20.8682	0.0457286	-2.34774
TGME49_206400	0	0	4	5.24444	0.160142	0	0	16	16	0.0588235	-1.44489	0	0	0	0	1	0	0	32	46.1614	0.0212038	-5.55953	0	0	3	5.69132	0.149447	-2.74229
TGME49_206415	0	0	12	15.7333	0.059761	0	0	10	10	0.0909091	0.605221	0	0	5	16.4804	0.0572068	0	0	11	15.868	0.059284	0.0514557	0	0	9	17.074	0.0553282	-0.0481702
TGME49_206430	0	0	21	27.5333	0.0350467	0	0	16	16	0.0588235	0.747114	0	0	5	16.4804	0.0572068	0	0	12	17.3105	0.0546134	-0.0669302	0	0	16	30.3537	0.0318942	-0.842894
TGME49_206440	0	0	0	0	1	0	0	5	5	0.166667	-2.58496	0	0	1	3.29609	0.23277	0	0	5	7.21271	0.121762	-0.934835	0	0	0	0	1	2.10302
TGME49_206450	0	0	4	5.24444	0.160142	0	0	29	29	0.0333333	-2.26432	0	0	4	13.1844	0.0705002	0	0	5	7.21271	0.121762	0.78837	0	0	3	5.69132	0.149447	1.08394
TGME49_206460	0	0	18	23.6	0.0406504	0	0	38	38	0.025641	-0.664816	0	0	8	26.3687	0.0365381	0	0	15	21.6381	0.0441732	0.273772	0	0	14	26.5595	0.0362851	-0.0100213
TGME49_206470	0	0	61	79.9778	0.0123491	0	0	94	94	0.0105263	-0.230401	0	0	24	79.1061	0.0124834	0	0	59	85.11	0.011613	-0.104268	0	0	42	79.6785	0.0123949	-0.0102706
TGME49_206480	0	0	36	47.2	0.0207469	0	0	55	55	0.0178571	-0.216394	0	0	12	39.5531	0.024659	0	0	42	60.5868	0.0162372	-0.60281	0	0	27	51.2219	0.0191491	-0.364843
TGME49_206490	0	0	17	22.2889	0.0429389	0	0	17	17	0.0555556	0.371645	0	0	6	19.7765	0.0481312	0	0	12	17.3105	0.0546134	0.182283	0	0	13	24.6624	0.0389675	-0.3047
TGME49_206500	0	0	2	2.62222	0.276074	0	0	6	6	0.142857	-0.95048	0	0	0	0	1	0	0	3	4.32763	0.187701	-2.41349	0	0	1	1.89711	0.345172	-1.53461
TGME49_206510	0	0	65	85.2222	0.0115979	0	0	75	75	0.0131579	0.18206	0	0	32	105.475	0.00939189	0	0	70	100.978	0.00980604	0.062255	0	0	42	79.6785	0.0123949	0.400257
TGME49_206520	0	0	0	0	1	0	0	0	0	1	0	0	0	0	0	1	0	0	0	0	1	0	0	0	0	0	1	0
TGME49_206540	0	0	24	31.4667	0.0308008	0	0	35	35	0.0277778	-0.149038	0	0	5	16.4804	0.0572068	0	0	17	24.5232	0.03918	-0.546069	0	0	16	30.3537	0.0318942	-0.842894
TGME49_206550	0	0	9	11.8	0.078125	0	0	4	4	0.2	1.35614	0	0	0	0	1	0	0	0	0	1	0	0	0	5	9.48553	0.0953695	-3.39033
TGME49_206560	0	0	0	0	1	0	0	0	0	1	0	0	0	0	0	1	0	0	0	0	1	0	0	0	0	0	1	0
TGME49_206570	0	0	0	0	1	0	0	0	0	1	0	0	0	0	0	1	0	0	0	0	1	0	0	0	0	0	1	0
TGME49_206580	0	0	16	20.9778	0.0455005	0	0	17	17	0.0555556	0.288049	0	0	10	32.9609	0.0294456	0	0	6	8.65526	0.103571	1.81449	0	0	8	15.1768	0.0618167	1.06994
TGME49_206590	0	0	26	34.0889	0.0284991	0	0	30	30	0.0322581	0.178746	0	0	7	23.0726	0.041541	0	0	9	12.9829	0.071516	0.783731	0	0	16	30.3537	0.0318942	-0.381242
TGME49_206600	0	0	1	1.31111	0.432692	0	0	1	1	0.5	0.208587	0	0	0	0	1	0	0	1	1.44254	0.409409	-1.28838	0	0	1	1.89711	0.345172	-1.53461
TGME49_206605	4	5.24444	6	7.86667	0.704261	10	10	11	11	0.916667	0.380288	4	13.1844	0	0	14.1844	19	27.4083	9	12.9829	2.03165	-2.80358	4	7.58842	5	9.48553	0.819074	-4.11416
TGME49_206610	4	5.24444	27	35.4	0.171551	10	10	35	35	0.305556	0.8328	4	13.1844	7	23.0726	0.589232	19	27.4083	28	40.3912	0.686337	0.220082	4	7.58842	20	37.9421	0.220543	-1.41777
TGME49_206620	0	0	0	0	1	0	0	0	0	1	0	0	0	0	0	1	0	0	0	0	1	0	0	0	0	0	1	0
TGME49_206630	0	0	15	19.6667	0.0483871	0	0	20	20	0.047619	-0.0230836	0	0	11	36.257	0.0268406	0	0	16	23.0807	0.0415271	0.629634	0	0	10	18.9711	0.0500725	0.8996
TGME49_206640	0	0	19	24.9111	0.0385935	0	0	27	27	0.0357143	-0.111856	0	0	8	26.3687	0.0365381	0	0	18	25.9658	0.0370841	0.0213985	0	0	14	26.5595	0.0362851	-0.0100213
TGME49_206650	0	0	0	0	1	0	0	0	0	1	0	0	0	0	0	1	0	0	0	0	1	0	0	0	0	0	1	0
TGME49_206660	0	0	0	0	1	0	0	2	2	0.333333	-1.58496	0	0	0	0	1	0	0	4	5.77017	0.147707	-2.75919	0	0	0	0	1	0
TGME49_206670	0	0	24	31.4667	0.0308008	0	0	29	29	0.0333333	0.113997	0	0	12	39.5531	0.024659	0	0	12	17.3105	0.0546134	1.14714	0	0	16	30.3537	0.0318942	0.371176
TGME49_206680	0	0	20	26.2222	0.0367347	0	0	12	12	0.0769231	1.06627	0	0	6	19.7765	0.0481312	0	0	15	21.6381	0.0441732	-0.1238	0	0	15	28.4566	0.0339483	-0.503635
TGME49_206690	19	24.9111	86	112.756	0.227779	46	46	105	105	0.443396	0.960963	23	75.8101	26	85.6983	0.885946	87	125.501	81	116.846	1.07345	0.276958	19	36.045	55	104.341	0.351668	-1.333
TGME49_206695	19	24.9111	26	34.0889	0.738442	46	46	56	56	0.824561	0.159142	23	75.8101	8	26.3687	2.80649	87	125.501	51	73.5697	1.69642	-0.726277	19	36.045	17	32.2508	1.11411	-1.33288
TGME49_206700	0	0	11	14.4222	0.0648415	0	0	6	6	0.142857	1.13958	0	0	2	6.59218	0.131714	0	0	7	10.0978	0.090108	-0.547688	0	0	7	13.2797	0.0700293	-0.911384
TGME49_206710	0	0	7	9.17778	0.0982533	0	0	11	11	0.0833333	-0.237612	0	0	5	16.4804	0.0572068	0	0	13	18.7531	0.0506251	-0.176334	0	0	6	11.3826	0.0807582	0.497424
TGME49_206910	0	0	0	0	1	0	0	0	0	1	0	0	0	0	0	1	0	0	0	0	1	0	0	0	0	0	1	0
TGME49_207005	0	0	0	0	1	0	0	2	2	0.333333	-1.58496	0	0	0	0	1	0	0	1	1.44254	0.409409	-1.28838	0	0	0	0	1	0
TGME49_207010	0	0	0	0	1	0	0	1	1	0.5	-1	0	0	0	0	1	0	0	0	0	1	0	0	0	0	0	1	0
TGME49_207015	1	1.31111	1	1.31111	1	0	0	1	1	0.5	-1	2	6.59218	1	3.29609	1.76723	2	2.88509	2	2.88509	1	-0.82149	1	1.89711	1	1.89711	1	-0.82149
TGME49_207020	0	0	10	13.1111	0.0708661	0	0	21	21	0.0454545	-0.640672	0	0	5	16.4804	0.0572068	0	0	9	12.9829	0.071516	0.32208	0	0	4	7.58842	0.116436	1.02528
TGME49_207030	0	0	0	0	1	2	2	2	2	1	0	0	0	0	0	1	2	2.88509	0	0	3.88509	1.95795	0	0	0	0	1	0
TGME49_207040	0	0	7	9.17778	0.0982533	2	2	7	7	0.375	1.93231	0	0	0	0	1	2	2.88509	6	8.65526	0.40238	-1.31337	0	0	5	9.48553	0.0953695	-3.39033
TGME49_207050	0	0	0	0	1	0	0	0	0	1	0	0	0	0	0	1	0	0	0	0	1	0	0	0	0	0	1	0
TGME49_207060	2	2.62222	218	285.822	0.0126288	6	6	302	302	0.0231023	0.871319	3	9.88827	74	243.911	0.0444581	8	11.5403	204	294.279	0.0424695	-0.0660199	2	3.79421	148	280.772	0.0170145	-1.38568
TGME49_207065	2	2.62222	81	106.2	0.0337894	6	6	159	159	0.04375	0.372713	3	9.88827	21	69.2179	0.155064	8	11.5403	108	155.795	0.0799794	-0.955164	2	3.79421	54	102.444	0.0463461	-1.74234
TGME49_207070	0	0	3	3.93333	0.202703	1	1	7	7	0.25	0.302563	0	0	0	0	1	2	2.88509	5	7.21271	0.473057	-1.07991	0	0	0	0	1	0
TGME49_207080	0	0	3	3.93333	0.202703	0	0	6	6	0.142857	-0.504792	0	0	0	0	1	0	0	0	0	1	0	0	0	1	1.89711	0.345172	-1.53461
TGME49_207100	0	0	5	6.55556	0.132353	0	0	7	7	0.125	-0.0824622	0	0	5	16.4804	0.0572068	0	0	6	8.65526	0.103571	0.856356	0	0	2	3.79421	0.208585	1.86638
TGME49_207110	0	0	0	0	1	0	0	0	0	1	0	0	0	0	0	1	0	0	0	0	1	0	0	0	0	0	1	0
TGME49_207120	0	0	2	2.62222	0.276074	0	0	12	12	0.0769231	-1.84356	0	0	2	6.59218	0.131714	0	0	3	4.32763	0.187701	0.511021	0	0	2	3.79421	0.208585	0.66322
TGME49_207130	0	0	0	0	1	0	0	1	1	0.5	-1	0	0	0	0	1	0	0	0	0	1	0	0	0	0	0	1	0
TGME49_207140	0	0	6	7.86667	0.112782	1	1	12	12	0.153846	0.447952	0	0	1	3.29609	0.23277	1	1.44254	17	24.5232	0.0956988	-1.28233	0	0	4	7.58842	0.116436	-0.999369
TGME49_207150	0	0	0	0	1	1	1	2	2	0.666667	-0.584963	0	0	0	0	1	1	1.44254	5	7.21271	0.29741	-1.74948	0	0	0	0	1	0
TGME49_207160	0	0	0	0	1	0	0	0	0	1	0	0	0	0	0	1	0	0	1	1.44254	0.409409	-1.28838	0	0	0	0	1	0
TGME49_207170	0	0	136	178.311	0.0055769	0	0	230	230	0.004329	-0.365428	0	0	58	191.173	0.00520364	0	0	165	238.02	0.00418376	-0.314722	0	0	90	170.74	0.00582277	0.162185
TGME49_207180	0	0	5	6.55556	0.132353	0	0	10	10	0.0909091	-0.541894	0	0	1	3.29609	0.23277	0	0	6	8.65526	0.103571	-1.16829	0	0	3	5.69132	0.149447	-0.639266
TGME49_207200	0	0	4	5.24444	0.160142	0	0	7	7	0.125	-0.357427	0	0	3	9.88827	0.091842	0	0	4	5.77017	0.147707	0.68551	0	0	2	3.79421	0.208585	1.18341
TGME49_207210	0	0	0	0	1	0	0	0	0	1	0	0	0	0	0	1	0	0	1	1.44254	0.409409	-1.28838	0	0	0	0	1	0
TGME49_207230	0	0	15	19.6667	0.0483871	0	0	10	10	0.0909091	0.909802	0	0	6	19.7765	0.0481312	0	0	8	11.5403	0.0797426	0.728378	0	0	10	18.9711	0.0500725	0.0570442
TGME49_207240	0	0	68	89.1556	0.0110919	0	0	77	77	0.0128205	0.208942	0	0	32	105.475	0.00939189	0	0	42	60.5868	0.0162372	0.78982	0	0	38	72.09	0.0136818	0.542766
TGME49_207250	0	0	0	0	1	0	0	0	0	1	0	0	0	0	0	1	0	0	0	0	1	0	0	0	0	0	1	0
TGME49_207350	0	0	0	0	1	0	0	0	0	1	0	0	0	0	0	1	0	0	0	0	1	0	0	0	0	0	1	0
TGME49_207360	0	0	0	0	1	0	0	0	0	1	0	0	0	0	0	1	0	0	0	0	1	0	0	0	0	0	1	0
TGME49_207365	0	0	0	0	1	0	0	1	1	0.5	-1	0	0	0	0	1	0	0	3	4.32763	0.187701	-2.41349	0	0	0	0	1	0
TGME49_207370	0	0	43	56.3778	0.0174284	0	0	45	45	0.0217391	0.318858	0	0	15	49.4413	0.019825	0	0	25	36.0636	0.0269807	0.444605	0	0	32	60.7074	0.0162055	-0.290837
TGME49_207380	0	0	0	0	1	0	0	0	0	1	0	0	0	0	0	1	0	0	0	0	1	0	0	0	0	0	1	0
TGME49_207390	0	0	17	22.2889	0.0429389	0	0	28	28	0.0344828	-0.316411	0	0	2	6.59218	0.131714	0	0	15	21.6381	0.0441732	-1.57617	0	0	12	22.7653	0.0420782	-1.64627
TGME49_207400	0	0	10	13.1111	0.0708661	0	0	14	14	0.0666667	-0.0881309	0	0	2	6.59218	0.131714	0	0	10	14.4254	0.064828	-1.02272	0	0	2	3.79421	0.208585	0.66322
TGME49_207403	0	0	1	1.31111	0.432692	0	0	1	1	0.5	0.208587	0	0	0	0	1	0	0	0	0	1	0	0	0	1	1.89711	0.345172	-1.53461
TGME49_207407	0	0	0	0	1	0	0	0	0	1	0	0	0	0	0	1	0	0	0	0	1	0	0	0	0	0	1	0
TGME49_207410	0	0	5	6.55556	0.132353	0	0	4	4	0.2	0.59561	0	0	0	0	1	0	0	0	0	1	0	0	0	5	9.48553	0.0953695	-3.39033
TGME49_207420	0	0	47	61.6222	0.0159688	0	0	66	66	0.0149254	-0.0974864	0	0	15	49.4413	0.019825	0	0	41	59.1443	0.0166267	-0.25382	0	0	30	56.9132	0.0172672	-0.199285
TGME49_207430	0	0	15	19.6667	0.0483871	0	0	30	30	0.0322581	-0.584963	0	0	10	32.9609	0.0294456	0	0	16	23.0807	0.0415271	0.495998	0	0	10	18.9711	0.0500725	0.765963
TGME49_207440	0	0	1233	1616.6	0.0006182	0	0	1422	1422	0.000702741	0.184919	0	0	436	1437.09	0.000695364	0	0	1098	1583.91	0.00063095	-0.140244	0	0	854	1620.13	0.000616854	-0.17284
TGME49_207450	0	0	8	10.4889	0.0870406	0	0	19	19	0.05	-0.799761	0	0	7	23.0726	0.041541	0	0	18	25.9658	0.0370841	-0.163736	0	0	6	11.3826	0.0807582	0.959075
TGME49_207460	0	0	23	30.1556	0.032097	0	0	23	23	0.0416667	0.376455	0	0	9	29.6648	0.0326107	0	0	10	14.4254	0.064828	0.991273	0	0	21	39.8392	0.0244863	-0.413372
TGME49_207470	0	0	2	2.62222	0.276074	0	0	5	5	0.166667	-0.728087	0	0	0	0	1	0	0	2	2.88509	0.257395	-1.95795	0	0	2	3.79421	0.208585	-2.26129
TGME49_207480	0	0	12	15.7333	0.059761	0	0	15	15	0.0625	0.064653	0	0	0	0	1	0	0	5	7.21271	0.121762	-3.03786	0	0	11	20.8682	0.0457286	-4.45076
TGME49_207590	0	0	12	15.7333	0.059761	0	0	13	13	0.0714286	0.257298	0	0	3	9.88827	0.091842	0	0	9	12.9829	0.071516	-0.360888	0	0	5	9.48553	0.0953695	0.0543746
TGME49_207600	0	0	4	5.24444	0.160142	0	0	3	3	0.25	0.642573	0	0	1	3.29609	0.23277	0	0	1	1.44254	0.409409	0.81464	0	0	4	7.58842	0.116436	-0.999369
TGME49_207610	0	0	0	0	1	0	0	0	0	1	0	0	0	0	0	1	0	0	0	0	1	0	0	0	0	0	1	0
TGME49_207620	0	0	69	90.4667	0.0109329	0	0	66	66	0.0149254	0.449085	0	0	21	69.2179	0.0142414	0	0	71	102.421	0.00966926	-0.558612	0	0	44	83.4727	0.0118381	-0.266646
TGME49_207630	0	0	2	2.62222	0.276074	0	0	7	7	0.125	-1.14312	0	0	0	0	1	0	0	2	2.88509	0.257395	-1.95795	0	0	2	3.79421	0.208585	-2.26129
TGME49_207640	0	0	24	31.4667	0.0308008	0	0	37	37	0.0263158	-0.22704	0	0	10	32.9609	0.0294456	0	0	20	28.8509	0.0334999	0.186102	0	0	18	34.1479	0.0284512	-0.0495645
TGME49_207650	0	0	0	0	1	0	0	0	0	1	0	0	0	1	3.29609	0.23277	0	0	0	0	1	2.10302	0	0	0	0	1	2.10302
TGME49_207665	0	0	22	28.8444	0.0335071	0	0	18	18	0.0526316	0.651463	0	0	4	13.1844	0.0705002	0	0	14	20.1956	0.0471796	-0.579464	0	0	16	30.3537	0.0318942	-1.14433
TGME49_207680	0	0	36	47.2	0.0207469	0	0	45	45	0.0217391	0.0673993	0	0	10	32.9609	0.0294456	0	0	42	60.5868	0.0162372	-0.858747	0	0	28	53.119	0.0184778	-0.67226
TGME49_207690	0	0	44	57.6889	0.017039	0	0	50	50	0.0196078	0.20259	0	0	10	32.9609	0.0294456	0	0	44	63.4719	0.0155106	-0.924796	0	0	31	58.8103	0.0167195	-0.816519
TGME49_207700	0	0	0	0	1	0	0	0	0	1	0	0	0	0	0	1	0	0	0	0	1	0	0	0	0	0	1	0
TGME49_207710	0	0	23	30.1556	0.032097	0	0	25	25	0.0384615	0.260978	0	0	8	26.3687	0.0365381	0	0	26	37.5061	0.0259699	-0.49256	0	0	17	32.2508	0.0300745	-0.280862
TGME49_207720	0	0	12	15.7333	0.059761	0	0	22	22	0.0434783	-0.458909	0	0	5	16.4804	0.0572068	0	0	6	8.65526	0.103571	0.856356	0	0	9	17.074	0.0553282	-0.0481702
TGME49_207730	0	0	0	0	1	0	0	0	0	1	0	0	0	0	0	1	0	0	0	0	1	0	0	0	0	0	1	0
TGME49_207740	0	0	0	0	1	0	0	0	0	1	0	0	0	0	0	1	0	0	0	0	1	0	0	0	0	0	1	0
TGME49_207750	0	0	46	60.3111	0.0163103	0	0	101	101	0.00980392	-0.734349	0	0	16	52.7374	0.018609	0	0	55	79.3399	0.0124471	-0.580188	0	0	32	60.7074	0.0162055	-0.199516
TGME49_207760	0	0	22	28.8444	0.0335071	0	0	23	23	0.0416667	0.314428	0	0	8	26.3687	0.0365381	0	0	25	36.0636	0.0269807	-0.437474	0	0	16	30.3537	0.0318942	-0.196108
TGME49_207770	0	0	70	91.7778	0.0107784	0	0	64	64	0.0153846	0.51334	0	0	28	92.2905	0.0107192	0	0	52	75.0122	0.0131558	0.295499	0	0	43	81.5756	0.0121101	0.176015
TGME49_207780	0	0	0	0	1	0	0	0	0	1	0	0	0	0	0	1	0	0	0	0	1	0	0	0	0	0	1	0
TGME49_207790	0	0	0	0	1	0	0	4	4	0.2	-2.32193	0	0	0	0	1	0	0	11	15.868	0.059284	-4.07621	0	0	0	0	1	0
TGME49_207800	0	0	17	22.2889	0.0429389	0	0	16	16	0.0588235	0.454107	0	0	10	32.9609	0.0294456	0	0	9	12.9829	0.071516	1.28021	0	0	10	18.9711	0.0500725	0.765963
TGME49_207810	0	0	0	0	1	0	0	0	0	1	0	0	0	0	0	1	0	0	0	0	1	0	0	0	0	0	1	0
TGME49_207820	0	0	47	61.6222	0.0159688	0	0	61	61	0.016129	0.0144065	0	0	27	88.9944	0.0111118	0	0	45	64.9144	0.0151712	0.449241	0	0	26	49.3248	0.0198709	0.838567
TGME49_207830	0	0	9	11.8	0.078125	0	0	24	24	0.04	-0.965784	0	0	4	13.1844	0.0705002	0	0	8	11.5403	0.0797426	0.177724	0	0	4	7.58842	0.116436	0.723835
TGME49_207840	0	0	1480	1940.44	0.00051508	0	0	2073	2073	0.00048216	-0.0952855	0	0	488	1608.49	0.000621314	0	0	1652	2383.08	0.000419449	-0.566828	0	0	979	1857.27	0.000538136	-0.207353
TGME49_207865	0	0	1	1.31111	0.432692	0	0	0	0	1	1.20859	0	0	0	0	1	0	0	3	4.32763	0.187701	-2.41349	0	0	1	1.89711	0.345172	-1.53461
TGME49_207875	0	0	0	0	1	0	0	0	0	1	0	0	0	0	0	1	0	0	1	1.44254	0.409409	-1.28838	0	0	0	0	1	0
TGME49_207880	0	0	6	7.86667	0.112782	0	0	18	18	0.0526316	-1.09954	0	0	5	16.4804	0.0572068	0	0	13	18.7531	0.0506251	-0.176334	0	0	4	7.58842	0.116436	1.02528
TGME49_207900	0	0	9	11.8	0.078125	0	0	21	21	0.0454545	-0.78136	0	0	4	13.1844	0.0705002	0	0	9	12.9829	0.071516	0.0206387	0	0	6	11.3826	0.0807582	0.195982
TGME49_207910	0	0	13	17.0444	0.0554187	0	0	13	13	0.0714286	0.366128	0	0	2	6.59218	0.131714	0	0	7	10.0978	0.090108	-0.547688	0	0	10	18.9711	0.0500725	-1.39533
TGME49_207920	0	0	4	5.24444	0.160142	0	0	7	7	0.125	-0.357427	0	0	3	9.88827	0.091842	0	0	13	18.7531	0.0506251	-0.859301	0	0	2	3.79421	0.208585	1.18341
TGME49_207930	0	0	39	51.1333	0.0191816	0	0	96	96	0.0103093	-0.895779	0	0	15	49.4413	0.019825	0	0	37	53.3741	0.0183911	-0.108313	0	0	30	56.9132	0.0172672	-0.199285
TGME49_207940	0	0	5	6.55556	0.132353	0	0	21	21	0.0454545	-1.54189	0	0	2	6.59218	0.131714	0	0	5	7.21271	0.121762	-0.113345	0	0	3	5.69132	0.149447	0.182223
TGME49_207950	0	0	33	43.2667	0.0225904	0	0	22	22	0.0434783	0.944587	0	0	7	23.0726	0.041541	0	0	26	37.5061	0.0259699	-0.677694	0	0	24	45.5305	0.0214913	-0.950785
TGME49_207955	0	0	1	1.31111	0.432692	0	0	0	0	1	1.20859	0	0	1	3.29609	0.23277	0	0	0	0	1	2.10302	0	0	0	0	1	2.10302
TGME49_207960	0	0	9	11.8	0.078125	0	0	10	10	0.0909091	0.21864	0	0	3	9.88827	0.091842	0	0	11	15.868	0.059284	-0.631512	0	0	3	5.69132	0.149447	0.702412
TGME49_207965	0	0	0	0	1	0	0	0	0	1	0	0	0	0	0	1	0	0	0	0	1	0	0	0	0	0	1	0
TGME49_207970	0	0	0	0	1	0	0	0	0	1	0	0	0	0	0	1	0	0	0	0	1	0	0	0	0	0	1	0
TGME49_207980	0	0	0	0	1	0	0	8	8	0.111111	-3.16993	0	0	2	6.59218	0.131714	0	0	2	2.88509	0.257395	0.966568	0	0	0	0	1	2.92451
TGME49_207990	0	0	8	10.4889	0.0870406	0	0	14	14	0.0666667	-0.384723	0	0	2	6.59218	0.131714	0	0	13	18.7531	0.0506251	-1.37949	0	0	6	11.3826	0.0807582	-0.705733
TGME49_208010	0	0	14	18.3556	0.0516648	0	0	16	16	0.0588235	0.187213	0	0	2	6.59218	0.131714	0	0	21	30.2934	0.0319556	-2.04327	0	0	6	11.3826	0.0807582	-0.705733
TGME49_208020	0	0	0	0	1	0	0	3	3	0.25	-2	0	0	0	0	1	0	0	0	0	1	0	0	0	0	0	1	0
TGME49_208030	0	0	502	658.178	0.00151704	0	0	696	696	0.00143472	-0.080491	0	0	183	603.184	0.00165512	0	0	452	652.029	0.00153132	-0.112159	0	0	335	635.531	0.00157102	-0.0752409
TGME49_208040	0	0	7	9.17778	0.0982533	0	0	5	5	0.166667	0.762388	0	0	3	9.88827	0.091842	0	0	5	7.21271	0.121762	0.406844	0	0	4	7.58842	0.116436	0.342309
TGME49_208050	0	0	7	9.17778	0.0982533	0	0	16	16	0.0588235	-0.740112	0	0	6	19.7765	0.0481312	0	0	3	4.32763	0.187701	1.96339	0	0	4	7.58842	0.116436	1.27449
TGME49_208070	0	0	4	5.24444	0.160142	0	0	15	15	0.0625	-1.35743	0	0	3	9.88827	0.091842	0	0	3	4.32763	0.187701	1.03121	0	0	4	7.58842	0.116436	0.342309
TGME49_208080	0	0	0	0	1	0	0	0	0	1	0	0	0	0	0	1	0	0	0	0	1	0	0	0	0	0	1	0
TGME49_208090	0	0	5	6.55556	0.132353	0	0	5	5	0.166667	0.332575	0	0	3	9.88827	0.091842	0	0	3	4.32763	0.187701	1.03121	0	0	2	3.79421	0.208585	1.18341
TGME49_208200	0	0	10	13.1111	0.0708661	0	0	28	28	0.0344828	-1.03922	0	0	5	16.4804	0.0572068	0	0	14	20.1956	0.0471796	-0.278023	0	0	5	9.48553	0.0953695	0.737342
TGME49_208300	0	0	39	51.1333	0.0191816	1	1	55	55	0.0357143	0.896779	0	0	12	39.5531	0.024659	1	1.44254	43	62.0293	0.0387525	0.652172	0	0	28	53.119	0.0184778	-0.416323
TGME49_208310	0	0	6	7.86667	0.112782	0	0	7	7	0.125	0.148392	0	0	1	3.29609	0.23277	0	0	5	7.21271	0.121762	-0.934835	0	0	5	9.48553	0.0953695	-1.2873
TGME49_208320	0	0	11	14.4222	0.0648415	1	1	10	10	0.181818	1.48751	0	0	3	9.88827	0.091842	1	1.44254	7	10.0978	0.220093	1.26088	0	0	7	13.2797	0.0700293	-0.391195
TGME49_208330	0	0	0	0	1	0	0	0	0	1	0	0	0	0	0	1	0	0	0	0	1	0	0	0	0	0	1	0
TGME49_208340	0	0	22	28.8444	0.0335071	0	0	19	19	0.05	0.577462	0	0	11	36.257	0.0268406	0	0	17	24.5232	0.03918	0.5457	0	0	16	30.3537	0.0318942	0.248875
TGME49_208350	0	0	16	20.9778	0.0455005	0	0	31	31	0.03125	-0.542026	0	0	9	29.6648	0.0326107	0	0	12	17.3105	0.0546134	0.743912	0	0	11	20.8682	0.0457286	0.487751
TGME49_208360	0	0	10	13.1111	0.0708661	0	0	7	7	0.125	0.81876	0	0	4	13.1844	0.0705002	0	0	3	4.32763	0.187701	1.41274	0	0	8	15.1768	0.0618167	-0.18963
TGME49_208370	0	0	34	44.5778	0.0219405	0	0	84	84	0.0117647	-0.899132	0	0	22	72.514	0.0136029	0	0	50	72.1271	0.0136748	0.00761144	0	0	25	47.4277	0.0206494	0.602187
TGME49_208380	0	0	0	0	1	0	0	0	0	1	0	0	0	0	0	1	0	0	0	0	1	0	0	0	0	0	1	0
TGME49_208390	0	0	16	20.9778	0.0455005	0	0	7	7	0.125	1.45797	0	0	6	19.7765	0.0481312	0	0	11	15.868	0.059284	0.300669	0	0	11	20.8682	0.0457286	-0.0738772
TGME49_208400	0	0	19	24.9111	0.0385935	0	0	22	22	0.0434783	0.171937	0	0	3	9.88827	0.091842	0	0	12	17.3105	0.0546134	-0.749898	0	0	13	24.6624	0.0389675	-1.23688
TGME49_208410	0	0	2	2.62222	0.276074	0	0	1	1	0.5	0.856875	0	0	0	0	1	0	0	3	4.32763	0.187701	-2.41349	0	0	1	1.89711	0.345172	-1.53461
TGME49_208420	0	0	17	22.2889	0.0429389	0	0	18	18	0.0526316	0.293642	0	0	8	26.3687	0.0365381	0	0	12	17.3105	0.0546134	0.579855	0	0	15	28.4566	0.0339483	-0.106063
TGME49_208430	0	0	23	30.1556	0.032097	0	0	42	42	0.0232558	-0.464847	0	0	8	26.3687	0.0365381	0	0	27	38.9487	0.0250321	-0.545619	0	0	15	28.4566	0.0339483	-0.106063
TGME49_208440	0	0	106	138.978	0.00714399	0	0	140	140	0.0070922	-0.0104974	0	0	40	131.844	0.00752765	0	0	110	158.68	0.00626254	-0.265453	0	0	66	125.209	0.00792337	0.0739136
TGME49_208450	0	0	294	385.467	0.00258755	0	0	766	766	0.00130378	-0.988883	0	0	128	421.899	0.00236463	0	0	357	514.988	0.00193803	-0.287022	0	0	210	398.392	0.0025038	0.0825082
TGME49_208460	0	0	0	0	1	0	0	0	0	1	0	0	0	0	0	1	0	0	0	0	1	0	0	0	0	0	1	0
TGME49_208470	0	0	0	0	1	0	0	0	0	1	0	0	0	0	0	1	0	0	0	0	1	0	0	0	0	0	1	0
TGME49_208480	0	0	0	0	1	0	0	0	0	1	0	0	0	0	0	1	0	0	0	0	1	0	0	0	0	0	1	0
TGME49_208490	0	0	7	9.17778	0.0982533	0	0	21	21	0.0454545	-1.11208	0	0	2	6.59218	0.131714	0	0	8	11.5403	0.0797426	-0.723991	0	0	4	7.58842	0.116436	-0.17788
TGME49_208500	0	0	16	20.9778	0.0455005	0	0	25	25	0.0384615	-0.242466	0	0	9	29.6648	0.0326107	0	0	8	11.5403	0.0797426	1.29001	0	0	9	17.074	0.0553282	0.762672
TGME49_208510	0	0	11	14.4222	0.0648415	0	0	19	19	0.05	-0.374989	0	0	7	23.0726	0.041541	0	0	3	4.32763	0.187701	2.17583	0	0	7	13.2797	0.0700293	0.753424
TGME49_208530	0	0	17	22.2889	0.0429389	0	0	16	16	0.0588235	0.454107	0	0	6	19.7765	0.0481312	0	0	21	30.2934	0.0319556	-0.590903	0	0	12	22.7653	0.0420782	-0.1939
TGME49_208540	0	0	8	10.4889	0.0870406	0	0	4	4	0.2	1.20024	0	0	4	13.1844	0.0705002	0	0	10	14.4254	0.064828	-0.12101	0	0	6	11.3826	0.0807582	0.195982
TGME49_208550	0	0	44	57.6889	0.017039	0	0	75	75	0.0131579	-0.372912	0	0	17	56.0335	0.0175335	0	0	36	51.9315	0.0188923	0.107682	0	0	28	53.119	0.0184778	0.0756757
TGME49_208560	0	0	29	38.0222	0.0256264	0	0	31	31	0.03125	0.286224	0	0	5	16.4804	0.0572068	0	0	31	44.7188	0.0218728	-1.38705	0	0	20	37.9421	0.0256791	-1.15559
TGME49_208570	0	0	33	43.2667	0.0225904	0	0	47	47	0.0208333	-0.116814	0	0	14	46.1453	0.021211	0	0	15	21.6381	0.0441732	1.05836	0	0	21	39.8392	0.0244863	0.207157
TGME49_208580	0	0	11	14.4222	0.0648415	0	0	10	10	0.0909091	0.487507	0	0	4	13.1844	0.0705002	0	0	8	11.5403	0.0797426	0.177724	0	0	6	11.3826	0.0807582	0.195982
TGME49_208590	0	0	41	53.7556	0.018263	0	0	46	46	0.0212766	0.220345	0	0	13	42.8492	0.0228055	0	0	35	50.489	0.0194216	-0.231715	0	0	23	43.6334	0.0224047	-0.0255757
TGME49_208710	0	0	4	5.24444	0.160142	0	0	7	7	0.125	-0.357427	0	0	4	13.1844	0.0705002	0	0	1	1.44254	0.409409	2.53785	0	0	3	5.69132	0.149447	1.08394
TGME49_208718	10	13.1111	55	72.1111	0.193009	13	13	67	67	0.205882	0.0931512	12	39.5531	25	82.4022	0.486235	23	33.1785	30	43.2763	0.771937	0.666829	10	18.9711	36	68.2958	0.2882	-0.754583
TGME49_208722	10	13.1111	10	13.1111	1	13	13	19	19	0.7	-0.514573	12	39.5531	3	9.88827	3.72447	23	33.1785	10	14.4254	2.21572	-0.749259	10	18.9711	6	11.3826	1.61283	-1.20744
TGME49_208730	0	0	20	26.2222	0.0367347	0	0	55	55	0.0178571	-1.04064	0	0	2	6.59218	0.131714	0	0	84	121.174	0.00818507	-4.00827	0	0	15	28.4566	0.0339483	-1.956
TGME49_208740	0	0	19	24.9111	0.0385935	0	0	24	24	0.04	0.0516428	0	0	1	3.29609	0.23277	0	0	6	8.65526	0.103571	-1.16829	0	0	10	18.9711	0.0500725	-2.21682
TGME49_208750	0	0	27	35.4	0.0274725	0	0	22	22	0.0434783	0.662305	0	0	8	26.3687	0.0365381	0	0	13	18.7531	0.0506251	0.470452	0	0	16	30.3537	0.0318942	-0.196108
TGME49_208760	0	0	0	0	1	0	0	0	0	1	0	0	0	1	3.29609	0.23277	0	0	0	0	1	2.10302	0	0	0	0	1	2.10302
TGME49_208770	0	0	1	1.31111	0.432692	0	0	2	2	0.333333	-0.376376	0	0	0	0	1	0	0	1	1.44254	0.409409	-1.28838	0	0	0	0	1	0
TGME49_208780	0	0	23	30.1556	0.032097	0	0	34	34	0.0285714	-0.167865	0	0	7	23.0726	0.041541	0	0	27	38.9487	0.0250321	-0.730753	0	0	13	24.6624	0.0389675	-0.0922614
TGME49_208790	0	0	49	64.2444	0.015327	0	0	62	62	0.015873	0.0505032	0	0	23	75.8101	0.0130191	0	0	41	59.1443	0.0166267	0.352868	0	0	33	62.6045	0.0157222	0.272166
TGME49_208800	0	0	48	62.9333	0.0156413	0	0	79	79	0.0125	-0.323432	0	0	28	92.2905	0.0107192	0	0	49	70.6846	0.01395	0.380067	0	0	32	60.7074	0.0162055	0.596287
TGME49_208810	0	0	0	0	1	0	0	2	2	0.333333	-1.58496	0	0	1	3.29609	0.23277	0	0	1	1.44254	0.409409	0.81464	0	0	0	0	1	2.10302
TGME49_208820	0	0	5	6.55556	0.132353	0	0	8	8	0.111111	-0.252387	0	0	3	9.88827	0.091842	0	0	18	25.9658	0.0370841	-1.30835	0	0	2	3.79421	0.208585	1.18341
TGME49_208830	0	0	227	297.622	0.00334871	2	2	358	358	0.00835655	1.3193	0	0	90	296.648	0.00335967	3	4.32763	252	363.521	0.0146154	2.1211	0	0	170	322.508	0.00309111	-0.120194
TGME49_208842	0	0	33	43.2667	0.0225904	2	2	34	34	0.0857143	1.92383	0	0	21	69.2179	0.0142414	3	4.32763	25	36.0636	0.143743	3.33533	0	0	23	43.6334	0.0224047	0.653713
TGME49_208850	0	0	36	47.2	0.0207469	0	0	27	27	0.0357143	0.783606	0	0	16	52.7374	0.018609	0	0	57	82.2249	0.0120156	-0.631089	0	0	26	49.3248	0.0198709	0.094659
TGME49_208910	0	0	3	3.93333	0.202703	0	0	4	4	0.2	-0.0193653	0	0	1	3.29609	0.23277	0	0	1	1.44254	0.409409	0.81464	0	0	2	3.79421	0.208585	-0.15827
TGME49_208970	0	0	44	57.6889	0.017039	0	0	39	39	0.025	0.553087	0	0	19	62.6257	0.0157169	0	0	24	34.621	0.0280733	0.83688	0	0	30	56.9132	0.0172672	0.135718
TGME49_208980	0	0	6	7.86667	0.112782	2	2	10	10	0.272727	1.27392	0	0	2	6.59218	0.131714	3	4.32763	8	11.5403	0.424839	1.6895	0	0	5	9.48553	0.0953695	-0.465814
TGME49_208990	0	0	4	5.24444	0.160142	2	2	12	12	0.230769	0.527096	0	0	1	3.29609	0.23277	3	4.32763	10	14.4254	0.34538	0.569279	0	0	4	7.58842	0.116436	-0.999369
TGME49_209000	0	0	22	28.8444	0.0335071	0	0	17	17	0.0555556	0.729465	0	0	13	42.8492	0.0228055	0	0	18	25.9658	0.0370841	0.70142	0	0	15	28.4566	0.0339483	0.573959
TGME49_209005	0	0	0	0	1	0	0	0	0	1	0	0	0	0	0	1	0	0	0	0	1	0	0	0	0	0	1	0
TGME49_209010	0	0	6	7.86667	0.112782	0	0	7	7	0.125	0.148392	0	0	7	23.0726	0.041541	0	0	5	7.21271	0.121762	1.55146	0	0	3	5.69132	0.149447	1.84703
TGME49_209020	0	0	1	1.31111	0.432692	0	0	3	3	0.25	-0.791413	0	0	0	0	1	0	0	2	2.88509	0.257395	-1.95795	0	0	1	1.89711	0.345172	-1.53461
TGME49_209030	0	0	2991	3921.53	0.000254937	0	0	3209	3209	0.000311526	0.289212	0	0	1183	3899.27	0.000256392	0	0	2428	3502.49	0.000285429	0.154781	0	0	2075	3936.5	0.000253969	-0.0137028
TGME49_209040	0	0	0	0	1	1	1	1	1	1	0	0	0	0	0	1	1	1.44254	0	0	2.44254	1.28838	0	0	0	0	1	0
TGME49_209045	0	0	0	0	1	1	1	5	5	0.333333	-1.58496	0	0	0	0	1	1	1.44254	2	2.88509	0.628697	-0.669563	0	0	0	0	1	0
TGME49_209050	0	0	32	41.9556	0.0232799	1	1	23	23	0.0833333	1.83981	0	0	8	26.3687	0.0365381	1	1.44254	14	20.1956	0.115238	1.65715	0	0	23	43.6334	0.0224047	-0.705597
TGME49_209060	0	0	20	26.2222	0.0367347	0	0	13	13	0.0714286	0.959358	0	0	8	26.3687	0.0365381	0	0	18	25.9658	0.0370841	0.0213985	0	0	10	18.9711	0.0500725	0.454617
TGME49_209070	0	0	25	32.7778	0.0296053	0	0	60	60	0.0163934	-0.852735	1	3.29609	14	46.1453	0.0911245	1	1.44254	22	31.7359	0.0746135	-0.288403	0	0	19	36.045	0.0269942	-1.75519
TGME49_209080	0	0	1	1.31111	0.432692	0	0	10	10	0.0909091	-2.25084	1	3.29609	1	3.29609	1	1	1.44254	4	5.77017	0.36078	-1.47081	0	0	1	1.89711	0.345172	-1.53461
TGME49_209090	29	38.0222	32	41.9556	0.908432	25	25	35	35	0.722222	-0.330936	36	118.659	11	36.257	3.21173	62	89.4377	40	57.7017	1.54063	-1.05983	29	55.0161	18	34.1479	1.59372	-1.01095
TGME49_209095	29	38.0222	68	89.1556	0.432832	25	25	68	68	0.376812	-0.199964	36	118.659	25	82.4022	1.43472	62	89.4377	62	89.4377	1	-0.520774	29	55.0161	41	77.7814	0.711032	-1.01279
TGME49_209100	0	0	29	38.0222	0.0256264	0	0	27	27	0.0357143	0.478869	0	0	8	26.3687	0.0365381	1	1.44254	17	24.5232	0.0956988	1.3891	0	0	19	36.045	0.0269942	-0.436752
TGME49_209108	5	6.55556	6	7.86667	0.85213	2	2	3	3	0.75	-0.184183	5	16.4804	1	3.29609	4.06892	6	8.65526	5	7.21271	1.17565	-1.79119	5	9.48553	4	7.58842	1.22089	-1.73671
TGME49_209112	5	6.55556	5	6.55556	1	2	2	2	2	1	0	5	16.4804	0	0	17.4804	5	7.21271	3	4.32763	1.54153	-3.5033	5	9.48553	3	5.69132	1.56704	-3.47963
TGME49_209120	0	0	36	47.2	0.0207469	0	0	30	30	0.0322581	0.636765	0	0	10	32.9609	0.0294456	0	0	26	37.5061	0.0259699	-0.181213	0	0	27	51.2219	0.0191491	-0.62078
TGME49_209130	0	0	7	9.17778	0.0982533	0	0	20	20	0.047619	-1.04497	0	0	3	9.88827	0.091842	1	1.44254	10	14.4254	0.158345	0.785848	0	0	6	11.3826	0.0807582	-0.185544
TGME49_209140	0	0	31	40.6444	0.0240128	0	0	39	39	0.025	0.058124	0	0	3	9.88827	0.091842	1	1.44254	22	31.7359	0.0746135	-0.299717	0	0	27	51.2219	0.0191491	-2.26188
TGME49_209150	0	0	31	40.6444	0.0240128	0	0	45	45	0.0217391	-0.14351	0	0	17	56.0335	0.0175335	0	0	16	23.0807	0.0415271	1.24393	0	0	17	32.2508	0.0300745	0.778421
TGME49_209160	0	0	25	32.7778	0.0296053	0	0	25	25	0.0384615	0.377563	0	0	12	39.5531	0.024659	1	1.44254	18	25.9658	0.0905794	1.87707	0	0	16	30.3537	0.0318942	0.371176
TGME49_209170	0	0	33	43.2667	0.0225904	0	0	34	34	0.0285714	0.338866	0	0	13	42.8492	0.0228055	1	1.44254	24	34.621	0.0685703	1.5882	0	0	24	45.5305	0.0214913	-0.0856289
TGME49_209180	0	0	0	0	1	0	0	2	2	0.333333	-1.58496	0	0	0	0	1	0	0	0	0	1	0	0	0	0	0	1	0
TGME49_209190	0	0	12	15.7333	0.059761	0	0	11	11	0.0833333	0.47969	0	0	2	6.59218	0.131714	0	0	7	10.0978	0.090108	-0.547688	0	0	9	17.074	0.0553282	-1.25133
TGME49_209200	0	0	29	38.0222	0.0256264	0	0	23	23	0.0416667	0.701262	0	0	12	39.5531	0.024659	0	0	17	24.5232	0.03918	0.668	0	0	18	34.1479	0.0284512	0.206372
TGME49_209210	0	0	21	27.5333	0.0350467	0	0	17	17	0.0555556	0.664651	0	0	4	13.1844	0.0705002	0	0	14	20.1956	0.0471796	-0.579464	0	0	16	30.3537	0.0318942	-1.14433
TGME49_209230	0	0	3	3.93333	0.202703	0	0	3	3	0.25	0.302563	0	0	1	3.29609	0.23277	0	0	3	4.32763	0.187701	-0.310469	0	0	3	5.69132	0.149447	-0.639266
TGME49_209240	0	0	5	6.55556	0.132353	0	0	5	5	0.166667	0.332575	0	0	2	6.59218	0.131714	0	0	5	7.21271	0.121762	-0.113345	0	0	4	7.58842	0.116436	-0.17788
TGME49_209250	0	0	92	120.622	0.00822218	0	0	87	87	0.0113636	0.466831	0	0	29	95.5866	0.0103534	0	0	52	75.0122	0.0131558	0.345591	0	0	62	117.621	0.00843024	-0.296459
TGME49_209260	0	0	176	230.756	0.00431489	0	0	278	278	0.00358423	-0.267661	0	0	65	214.246	0.00464585	0	0	199	287.066	0.00347143	-0.420414	0	0	121	229.55	0.00433746	-0.0990935
TGME49_209270	0	0	0	0	1	0	0	5	5	0.166667	-2.58496	0	0	1	3.29609	0.23277	0	0	5	7.21271	0.121762	-0.934835	0	0	0	0	1	2.10302
TGME49_209280	0	0	4	5.24444	0.160142	0	0	1	1	0.5	1.64257	0	0	1	3.29609	0.23277	0	0	4	5.77017	0.147707	-0.656168	0	0	4	7.58842	0.116436	-0.999369
TGME49_209290	0	0	1000	1311.11	0.000762131	0	0	1125	1125	0.000888099	0.220683	0	0	367	1209.66	0.000825992	0	0	777	1120.86	0.00089138	0.109912	0	0	690	1309	0.000763357	-0.113771
TGME49_209300	0	0	0	0	1	0	0	0	0	1	0	0	0	0	0	1	0	0	5	7.21271	0.121762	-3.03786	0	0	0	0	1	0
TGME49_209410	0	0	0	0	1	4	4	5	5	0.833333	-0.263034	0	0	2	6.59218	0.131714	4	5.77017	1	1.44254	2.77177	4.39532	0	0	0	0	1	2.92451
TGME49_209420	0	0	85	111.444	0.00889328	4	4	103	103	0.0480769	2.43456	0	0	32	105.475	0.00939189	4	5.77017	65	93.7653	0.0714415	2.92727	0	0	60	113.826	0.0087088	-0.108941
TGME49_209430	0	0	36	47.2	0.0207469	0	0	42	42	0.0232558	0.164696	0	0	14	46.1453	0.021211	0	0	36	51.9315	0.0188923	-0.167015	0	0	23	43.6334	0.0224047	0.0789874
TGME49_209440	0	0	7	9.17778	0.0982533	0	0	10	10	0.0909091	-0.112081	0	0	2	6.59218	0.131714	0	0	8	11.5403	0.0797426	-0.723991	0	0	5	9.48553	0.0953695	-0.465814
TGME49_209450	0	0	30	39.3333	0.0247934	0	0	14	14	0.0666667	1.42701	0	0	9	29.6648	0.0326107	0	0	9	12.9829	0.071516	1.13292	0	0	18	34.1479	0.0284512	-0.196855
TGME49_209460	0	0	4	5.24444	0.160142	0	0	4	4	0.2	0.320645	0	0	1	3.29609	0.23277	0	0	6	8.65526	0.103571	-1.16829	0	0	4	7.58842	0.116436	-0.999369
TGME49_209470	0	0	0	0	1	0	0	0	0	1	0	0	0	0	0	1	0	0	0	0	1	0	0	0	0	0	1	0
TGME49_209480	0	0	0	0	1	0	0	0	0	1	0	0	0	0	0	1	1	1.44254	1	1.44254	1	0	0	0	0	0	1	0
TGME49_209485	0	0	0	0	1	0	0	1	1	0.5	-1	0	0	0	0	1	1	1.44254	1	1.44254	1	0	0	0	0	0	1	0
TGME49_209490	0	0	18	23.6	0.0406504	0	0	32	32	0.030303	-0.423808	0	0	7	23.0726	0.041541	0	0	21	30.2934	0.0319556	-0.378465	0	0	11	20.8682	0.0457286	0.138561
TGME49_209500	0	0	18	23.6	0.0406504	0	0	22	22	0.0434783	0.0970245	0	0	8	26.3687	0.0365381	0	0	14	20.1956	0.0471796	0.368763	0	0	11	20.8682	0.0457286	0.323695
TGME49_209510	0	0	0	0	1	0	0	0	0	1	0	0	0	0	0	1	0	0	0	0	1	0	0	0	0	0	1	0
TGME49_209515	0	0	0	0	1	0	0	1	1	0.5	-1	0	0	0	0	1	0	0	1	1.44254	0.409409	-1.28838	0	0	0	0	1	0
TGME49_209520	0	0	7	9.17778	0.0982533	0	0	5	5	0.166667	0.762388	0	0	2	6.59218	0.131714	0	0	6	8.65526	0.103571	-0.346801	0	0	4	7.58842	0.116436	-0.17788
TGME49_209530	0	0	0	0	1	0	0	12	12	0.0769231	-3.70044	0	0	2	6.59218	0.131714	0	0	7	10.0978	0.090108	-0.547688	0	0	0	0	1	2.92451
TGME49_209540	0	0	5	6.55556	0.132353	0	0	4	4	0.2	0.59561	0	0	2	6.59218	0.131714	0	0	1	1.44254	0.409409	1.63613	0	0	3	5.69132	0.149447	0.182223
TGME49_209550	0	0	2	2.62222	0.276074	0	0	12	12	0.0769231	-1.84356	0	0	2	6.59218	0.131714	0	0	4	5.77017	0.147707	0.165322	0	0	1	1.89711	0.345172	1.3899
TGME49_209560	0	0	0	0	1	0	0	0	0	1	0	0	0	0	0	1	0	0	0	0	1	0	0	0	0	0	1	0
TGME49_209570	0	0	14	18.3556	0.0516648	0	0	24	24	0.04	-0.36918	0	0	5	16.4804	0.0572068	0	0	13	18.7531	0.0506251	-0.176334	0	0	10	18.9711	0.0500725	-0.192169
TGME49_209580	0	0	10	13.1111	0.0708661	0	0	13	13	0.0714286	0.0114048	0	0	5	16.4804	0.0572068	0	0	7	10.0978	0.090108	0.655468	0	0	5	9.48553	0.0953695	0.737342
TGME49_209583	0	0	0	0	1	1	1	1	1	1	0	0	0	0	0	1	1	1.44254	0	0	2.44254	1.28838	0	0	0	0	1	0
TGME49_209585	0	0	0	0	1	1	1	1	1	1	0	0	0	0	0	1	1	1.44254	0	0	2.44254	1.28838	0	0	0	0	1	0
TGME49_209590	0	0	0	0	1	0	0	0	0	1	0	0	0	0	0	1	0	0	0	0	1	0	0	0	0	0	1	0
TGME49_209600	0	0	239	313.356	0.00318111	0	0	238	238	0.0041841	0.395387	0	0	81	266.983	0.00373158	0	0	183	263.985	0.00377379	0.0162303	0	0	165	313.023	0.00318449	-0.228725
TGME49_209610	0	0	0	0	1	0	0	0	0	1	0	0	0	0	0	1	0	0	0	0	1	0	0	0	0	0	1	0
TGME49_209620	0	0	10	13.1111	0.0708661	0	0	8	8	0.111111	0.648835	0	0	2	6.59218	0.131714	1	1.44254	3	4.32763	0.458467	1.7994	0	0	5	9.48553	0.0953695	-0.465814
TGME49_209630	0	0	11	14.4222	0.0648415	0	0	8	8	0.111111	0.777014	0	0	2	6.59218	0.131714	1	1.44254	3	4.32763	0.458467	1.7994	0	0	6	11.3826	0.0807582	-0.705733
TGME49_209640	0	0	2	2.62222	0.276074	0	0	7	7	0.125	-1.14312	0	0	0	0	1	0	0	1	1.44254	0.409409	-1.28838	0	0	1	1.89711	0.345172	-1.53461
TGME49_209650	0	0	2	2.62222	0.276074	0	0	3	3	0.25	-0.143125	0	0	4	13.1844	0.0705002	0	0	2	2.88509	0.257395	1.86828	0	0	2	3.79421	0.208585	1.56494
TGME49_209670	4	5.24444	4	5.24444	1	5	5	6	6	0.857143	-0.222392	4	13.1844	0	0	14.1844	10	14.4254	7	10.0978	1.38995	-3.35119	4	7.58842	1	1.89711	2.96448	-2.25845
TGME49_209680	4	5.24444	16	20.9778	0.284125	5	5	16	16	0.352941	0.3129	4	13.1844	4	13.1844	1	10	14.4254	11	15.868	0.91448	-0.128976	4	7.58842	10	18.9711	0.430043	-1.21745
TGME49_209690	0	0	23	30.1556	0.032097	0	0	47	47	0.0208333	-0.623545	0	0	13	42.8492	0.0228055	0	0	35	50.489	0.0194216	-0.231715	0	0	17	32.2508	0.0300745	0.39916
TGME49_209700	0	0	91	119.311	0.00831178	1	1	60	60	0.0327869	1.97989	0	0	31	102.179	0.00969192	1	1.44254	58	83.6675	0.0288487	1.57365	0	0	62	117.621	0.00843024	-0.201208
TGME49_209705	0	0	0	0	1	1	1	3	3	0.5	-1	0	0	0	0	1	1	1.44254	1	1.44254	1	0	0	0	0	0	1	0
TGME49_209710	0	0	35	45.8889	0.021327	0	0	53	53	0.0185185	-0.203713	0	0	11	36.257	0.0268406	0	0	36	51.9315	0.0188923	-0.506617	0	0	27	51.2219	0.0191491	-0.487143
TGME49_209720	0	0	113	148.156	0.00670441	0	0	127	127	0.0078125	0.220674	0	0	36	118.659	0.00835707	0	0	93	134.156	0.00739883	-0.175699	0	0	81	153.666	0.00646556	-0.370221
TGME49_209730	0	0	7	9.17778	0.0982533	0	0	5	5	0.166667	0.762388	0	0	2	6.59218	0.131714	0	0	9	12.9829	0.071516	-0.881076	0	0	6	11.3826	0.0807582	-0.705733
TGME49_209740	0	0	8	10.4889	0.0870406	0	0	12	12	0.0769231	-0.178272	0	0	4	13.1844	0.0705002	0	0	10	14.4254	0.064828	-0.12101	0	0	7	13.2797	0.0700293	-0.00966918
TGME49_209755	0	0	0	0	1	0	0	0	0	1	0	0	0	0	0	1	0	0	2	2.88509	0.257395	-1.95795	0	0	0	0	1	0
TGME49_209770	0	0	1	1.31111	0.432692	0	0	2	2	0.333333	-0.376376	0	0	1	3.29609	0.23277	0	0	5	7.21271	0.121762	-0.934835	0	0	1	1.89711	0.345172	0.568411
TGME49_209780	0	0	0	0	1	0	0	0	0	1	0	0	0	0	0	1	0	0	0	0	1	0	0	0	0	0	1	0
TGME49_209790	0	0	8	10.4889	0.0870406	0	0	14	14	0.0666667	-0.384723	0	0	3	9.88827	0.091842	0	0	8	11.5403	0.0797426	-0.203802	0	0	6	11.3826	0.0807582	-0.185544
TGME49_209800	0	0	38	49.8222	0.0196764	0	0	78	78	0.0126582	-0.636393	0	0	9	29.6648	0.0326107	0	0	53	76.4548	0.0129108	-1.33677	0	0	30	56.9132	0.0172672	-0.917308
TGME49_209810	0	0	0	0	1	0	0	0	0	1	0	0	0	2	6.59218	0.131714	0	0	1	1.44254	0.409409	1.63613	0	0	0	0	1	2.92451
TGME49_209820	0	0	2	2.62222	0.276074	0	0	3	3	0.25	-0.143125	0	0	4	13.1844	0.0705002	0	0	3	4.32763	0.187701	1.41274	0	0	1	1.89711	0.345172	2.29162
TGME49_209830	0	0	3	3.93333	0.202703	0	0	1	1	0.5	1.30256	0	0	4	13.1844	0.0705002	0	0	2	2.88509	0.257395	1.86828	0	0	2	3.79421	0.208585	1.56494
TGME49_209850	0	0	7	9.17778	0.0982533	0	0	7	7	0.125	0.347351	0	0	7	23.0726	0.041541	0	0	11	15.868	0.059284	0.513107	0	0	3	5.69132	0.149447	1.84703
TGME49_209860	0	0	5	6.55556	0.132353	0	0	4	4	0.2	0.59561	0	0	3	9.88827	0.091842	0	0	8	11.5403	0.0797426	-0.203802	0	0	2	3.79421	0.208585	1.18341
TGME49_209870	0	0	6	7.86667	0.112782	0	0	25	25	0.0384615	-1.55205	0	0	10	32.9609	0.0294456	0	0	6	8.65526	0.103571	1.81449	0	0	5	9.48553	0.0953695	1.69547
TGME49_209880	0	0	31	40.6444	0.0240128	0	0	40	40	0.0243902	0.0225001	0	0	9	29.6648	0.0326107	0	0	16	23.0807	0.0415271	0.348707	0	0	25	47.4277	0.0206494	-0.659247
TGME49_209890	0	0	75	98.3333	0.0100671	0	0	95	95	0.0104167	0.0492435	0	0	20	65.9218	0.0149428	0	0	46	66.357	0.0148463	-0.00935122	0	0	47	89.164	0.0110909	-0.430075
TGME49_209900	0	0	23	30.1556	0.032097	1	1	36	36	0.0540541	0.751964	0	0	11	36.257	0.0268406	2	2.88509	23	33.1785	0.113671	2.08237	0	0	16	30.3537	0.0318942	0.248875
TGME49_209910	0	0	811	1063.31	0.000939575	1	1	1054	1054	0.00189573	1.01268	0	0	240	791.061	0.00126253	2	2.88509	867	1250.68	0.00310389	1.29776	0	0	561	1064.28	0.000938723	-0.427544
TGME49_209920	0	0	0	0	1	0	0	0	0	1	0	0	0	0	0	1	0	0	0	0	1	0	0	0	0	0	1	0
TGME49_209930	0	0	0	0	1	0	0	4	4	0.2	-2.32193	0	0	1	3.29609	0.23277	0	0	1	1.44254	0.409409	0.81464	0	0	0	0	1	2.10302
TGME49_209940	0	0	8	10.4889	0.0870406	0	0	13	13	0.0714286	-0.285188	0	0	4	13.1844	0.0705002	0	0	12	17.3105	0.0546134	-0.368371	0	0	4	7.58842	0.116436	0.723835
TGME49_209945	0	0	66	86.5333	0.0114242	0	0	139	139	0.00714286	-0.677522	0	0	18	59.3296	0.0165756	0	0	99	142.812	0.00695354	-1.25324	0	0	48	91.0611	0.0108624	-0.609725
TGME49_209950	0	0	148	194.044	0.00512704	0	0	185	185	0.00537634	0.0685003	0	0	52	171.397	0.00580058	0	0	124	178.875	0.00555941	-0.0612654	0	0	111	210.579	0.00472637	-0.295463
TGME49_209960	0	0	12	15.7333	0.059761	0	0	11	11	0.0833333	0.47969	0	0	5	16.4804	0.0572068	0	0	16	23.0807	0.0415271	-0.462134	0	0	8	15.1768	0.0618167	0.111811
TGME49_209970	0	0	9	11.8	0.078125	0	0	7	7	0.125	0.678072	0	0	2	6.59218	0.131714	0	0	1	1.44254	0.409409	1.63613	0	0	5	9.48553	0.0953695	-0.465814
TGME49_209985	0	0	3	3.93333	0.202703	0	0	5	5	0.166667	-0.2824	0	0	0	0	1	3	4.32763	5	7.21271	0.648705	-0.624366	0	0	2	3.79421	0.208585	-2.26129
TGME49_210095	0	0	0	0	1	0	0	0	0	1	0	0	0	0	0	1	0	0	0	0	1	0	0	0	0	0	1	0
TGME49_210100	0	0	0	0	1	0	0	0	0	1	0	0	0	0	0	1	0	0	0	0	1	0	0	0	0	0	1	0
TGME49_210210	0	0	0	0	1	0	0	0	0	1	0	0	0	0	0	1	0	0	0	0	1	0	0	0	0	0	1	0
TGME49_210220	1	1.31111	2	2.62222	0.638037	4	4	5	5	0.833333	0.385254	1	3.29609	0	0	4.29609	6	8.65526	3	4.32763	1.8123	-1.2452	1	1.89711	1	1.89711	1	-2.10302
TGME49_210230	1	1.31111	20	26.2222	0.084898	4	4	20	20	0.238095	1.48774	1	3.29609	3	9.88827	0.394561	6	8.65526	10	14.4254	0.625931	0.665755	1	1.89711	13	24.6624	0.112893	-1.80529
TGME49_210235	0	0	1	1.31111	0.432692	0	0	4	4	0.2	-1.11334	0	0	0	0	1	0	0	3	4.32763	0.187701	-2.41349	0	0	0	0	1	0
TGME49_210245	0	0	0	0	1	0	0	2	2	0.333333	-1.58496	0	0	0	0	1	0	0	0	0	1	0	0	0	0	0	1	0
TGME49_210255	0	0	50	65.5556	0.015025	2	2	81	81	0.0365854	1.2839	0	0	29	95.5866	0.0103534	5	7.21271	65	93.7653	0.0866637	3.06532	0	0	31	58.8103	0.0167195	0.691429
TGME49_210260	0	0	2	2.62222	0.276074	2	2	9	9	0.3	0.119909	0	0	1	3.29609	0.23277	5	7.21271	8	11.5403	0.654903	1.49238	0	0	0	0	1	2.10302
TGME49_210270	0	0	15	19.6667	0.0483871	0	0	11	11	0.0833333	0.784271	0	0	10	32.9609	0.0294456	0	0	13	18.7531	0.0506251	0.781799	0	0	9	17.074	0.0553282	0.909962
TGME49_210280	0	0	15	19.6667	0.0483871	0	0	15	15	0.0625	0.369234	0	0	8	26.3687	0.0365381	0	0	11	15.868	0.059284	0.698241	0	0	7	13.2797	0.0700293	0.938558
TGME49_210300	0	0	13	17.0444	0.0554187	0	0	21	21	0.0454545	-0.285949	0	0	5	16.4804	0.0572068	0	0	16	23.0807	0.0415271	-0.462134	0	0	8	15.1768	0.0618167	0.111811
TGME49_210310	0	0	4	5.24444	0.160142	0	0	5	5	0.166667	0.0576107	0	0	4	13.1844	0.0705002	0	0	2	2.88509	0.257395	1.86828	0	0	2	3.79421	0.208585	1.56494
TGME49_210320	0	0	6	7.86667	0.112782	0	0	4	4	0.2	0.826464	0	0	0	0	1	0	0	1	1.44254	0.409409	-1.28838	0	0	6	11.3826	0.0807582	-3.63025
TGME49_210330	0	0	1	1.31111	0.432692	0	0	0	0	1	1.20859	0	0	1	3.29609	0.23277	0	0	0	0	1	2.10302	0	0	0	0	1	2.10302
TGME49_210345	0	0	11	14.4222	0.0648415	0	0	5	5	0.166667	1.36198	0	0	6	19.7765	0.0481312	0	0	4	5.77017	0.147707	1.61769	0	0	5	9.48553	0.0953695	0.986555
TGME49_210360	0	0	7	9.17778	0.0982533	0	0	14	14	0.0666667	-0.55954	0	0	4	13.1844	0.0705002	0	0	8	11.5403	0.0797426	0.177724	0	0	3	5.69132	0.149447	1.08394
TGME49_210370	0	0	160	209.778	0.00474433	0	0	133	133	0.00746269	0.65349	0	0	75	247.207	0.0040289	0	0	99	142.812	0.00695354	0.787361	0	0	115	218.167	0.00456273	0.17951
TGME49_210380	0	0	24	31.4667	0.0308008	0	0	46	46	0.0212766	-0.533701	0	0	15	49.4413	0.019825	0	0	26	37.5061	0.0259699	0.389519	0	0	15	28.4566	0.0339483	0.776016
TGME49_210390	0	0	2	2.62222	0.276074	0	0	8	8	0.111111	-1.31305	0	0	1	3.29609	0.23277	0	0	3	4.32763	0.187701	-0.310469	0	0	1	1.89711	0.345172	0.568411
TGME49_210400	0	0	0	0	1	0	0	0	0	1	0	0	0	0	0	1	0	0	0	0	1	0	0	0	0	0	1	0
TGME49_210408	0	0	672	881.067	0.0011337	2	2	760	760	0.00394218	1.79795	0	0	228	751.508	0.00132889	4	5.77017	582	839.56	0.00805436	2.59955	0	0	443	840.418	0.00118847	-0.161115
TGME49_210412	0	0	18	23.6	0.0406504	2	2	13	13	0.214286	2.39819	0	0	8	26.3687	0.0365381	4	5.77017	5	7.21271	0.824352	4.49579	0	0	14	26.5595	0.0362851	-0.0100213
TGME49_210420	0	0	50	65.5556	0.015025	1	1	26	26	0.0740741	2.3016	0	0	16	52.7374	0.018609	1	1.44254	19	27.4083	0.0859799	2.208	0	0	35	66.3987	0.0148371	-0.326794
TGME49_210430	0	0	1	1.31111	0.432692	0	0	1	1	0.5	0.208587	0	0	1	3.29609	0.23277	0	0	2	2.88509	0.257395	0.145078	0	0	0	0	1	2.10302
TGME49_210440	0	0	7	9.17778	0.0982533	0	0	13	13	0.0714286	-0.460004	0	0	5	16.4804	0.0572068	0	0	6	8.65526	0.103571	0.856356	0	0	3	5.69132	0.149447	1.38538
TGME49_210450	0	0	3	3.93333	0.202703	0	0	3	3	0.25	0.302563	0	0	1	3.29609	0.23277	0	0	4	5.77017	0.147707	-0.656168	0	0	2	3.79421	0.208585	-0.15827
TGME49_210460	0	0	0	0	1	0	0	0	0	1	0	0	0	0	0	1	0	0	0	0	1	0	0	0	0	0	1	0
TGME49_210470	0	0	0	0	1	0	0	0	0	1	0	0	0	0	0	1	0	0	0	0	1	0	0	0	0	0	1	0
TGME49_210478	0	0	0	0	1	0	0	0	0	1	0	0	0	0	0	1	0	0	0	0	1	0	0	0	0	0	1	0
TGME49_210482	0	0	10	13.1111	0.0708661	0	0	14	14	0.0666667	-0.0881309	0	0	0	0	1	0	0	1	1.44254	0.409409	-1.28838	0	0	9	17.074	0.0553282	-4.17584
TGME49_210490	0	0	11	14.4222	0.0648415	0	0	12	12	0.0769231	0.246499	0	0	7	23.0726	0.041541	0	0	9	12.9829	0.071516	0.783731	0	0	8	15.1768	0.0618167	0.573463
TGME49_210600	0	0	0	0	1	0	0	0	0	1	0	0	0	0	0	1	0	0	0	0	1	0	0	0	0	0	1	0
TGME49_210678	0	0	0	0	1	0	0	0	0	1	0	0	0	0	0	1	0	0	0	0	1	0	0	0	0	0	1	0
TGME49_210682	0	0	0	0	1	0	0	27	27	0.0357143	-4.80735	0	0	0	0	1	0	0	7	10.0978	0.090108	-3.4722	0	0	0	0	1	0
TGME49_210690	0	0	1201	1574.64	0.000634661	0	0	1623	1623	0.000615764	-0.0436096	0	0	379	1249.22	0.000799861	0	0	1162	1676.23	0.000596219	-0.423905	0	0	814	1544.24	0.000647147	-0.305655
TGME49_210700	0	0	9	11.8	0.078125	0	0	21	21	0.0454545	-0.78136	0	0	9	29.6648	0.0326107	0	0	10	14.4254	0.064828	0.991273	0	0	6	11.3826	0.0807582	1.30827
TGME49_210715	7	9.17778	8	10.4889	0.88588	6	6	8	8	0.777778	-0.187753	8	26.3687	1	3.29609	6.37061	14	20.1956	8	11.5403	1.69019	-1.91424	7	13.2797	6	11.3826	1.15321	-2.46578
TGME49_210730	7	9.17778	20	26.2222	0.373878	6	6	21	21	0.318182	-0.232714	8	26.3687	5	16.4804	1.56568	14	20.1956	18	25.9658	0.786019	-0.99415	7	13.2797	14	26.5595	0.518143	-1.59536
TGME49_210740	0	0	0	0	1	0	0	0	0	1	0	0	0	0	0	1	0	0	0	0	1	0	0	0	0	0	1	0
TGME49_210750	0	0	8	10.4889	0.0870406	0	0	10	10	0.0909091	0.0627358	0	0	3	9.88827	0.091842	0	0	4	5.77017	0.147707	0.68551	0	0	6	11.3826	0.0807582	-0.185544
TGME49_210760	0	0	7	9.17778	0.0982533	0	0	18	18	0.0526316	-0.900577	0	0	11	36.257	0.0268406	0	0	11	15.868	0.059284	1.14322	0	0	3	5.69132	0.149447	2.47715
TGME49_210770	0	0	0	0	1	0	0	0	0	1	0	0	0	0	0	1	0	0	0	0	1	0	0	0	0	0	1	0
TGME49_210778	0	0	27	35.4	0.0274725	0	0	32	32	0.030303	0.141472	0	0	11	36.257	0.0268406	0	0	15	21.6381	0.0441732	0.718755	0	0	17	32.2508	0.0300745	0.164122
TGME49_210781	0	0	9	11.8	0.078125	0	0	14	14	0.0666667	-0.228819	0	0	2	6.59218	0.131714	0	0	4	5.77017	0.147707	0.165322	0	0	4	7.58842	0.116436	-0.17788
TGME49_210783	0	0	0	0	1	0	0	0	0	1	0	0	0	0	0	1	0	0	0	0	1	0	0	0	0	0	1	0
TGME49_210787	0	0	13	17.0444	0.0554187	0	0	23	23	0.0416667	-0.41148	0	0	3	9.88827	0.091842	0	0	29	41.8337	0.0233461	-1.97597	0	0	9	17.074	0.0553282	-0.731138
TGME49_210790	0	0	6	7.86667	0.112782	0	0	22	22	0.0434783	-1.37517	0	0	6	19.7765	0.0481312	0	0	15	21.6381	0.0441732	-0.1238	0	0	2	3.79421	0.208585	2.11559
TGME49_210800	0	0	24	31.4667	0.0308008	0	0	22	22	0.0434783	0.497325	0	0	8	26.3687	0.0365381	0	0	17	24.5232	0.03918	0.100717	0	0	18	34.1479	0.0284512	-0.360911
TGME49_210810	0	0	64	83.9111	0.011777	0	0	76	76	0.012987	0.141095	0	0	31	102.179	0.00969192	0	0	45	64.9144	0.0151712	0.64648	0	0	41	77.7814	0.0126934	0.38922
TGME49_210815	0	0	0	0	1	0	0	0	0	1	0	0	0	1	3.29609	0.23277	0	0	0	0	1	2.10302	0	0	0	0	1	2.10302
TGME49_210820	0	0	11	14.4222	0.0648415	0	0	9	9	0.1	0.625011	0	0	6	19.7765	0.0481312	0	0	4	5.77017	0.147707	1.61769	0	0	9	17.074	0.0553282	0.201043
TGME49_210830	0	0	6	7.86667	0.112782	0	0	4	4	0.2	0.826464	0	0	2	6.59218	0.131714	0	0	3	4.32763	0.187701	0.511021	0	0	4	7.58842	0.116436	-0.17788
TGME49_210840	0	0	31	40.6444	0.0240128	0	0	64	64	0.0153846	-0.642316	0	0	14	46.1453	0.021211	0	0	50	72.1271	0.0136748	-0.633294	0	0	26	49.3248	0.0198709	-0.0941559
TGME49_210950	0	0	1	1.31111	0.432692	0	0	0	0	1	1.20859	0	0	0	0	1	0	0	1	1.44254	0.409409	-1.28838	0	0	1	1.89711	0.345172	-1.53461
TGME49_210960	0	0	21	27.5333	0.0350467	0	0	17	17	0.0555556	0.664651	0	0	5	16.4804	0.0572068	0	0	12	17.3105	0.0546134	-0.0669302	0	0	15	28.4566	0.0339483	-0.752848
TGME49_210970	0	0	0	0	1	0	0	0	0	1	0	0	0	0	0	1	0	0	0	0	1	0	0	0	0	0	1	0
TGME49_210975	0	0	0	0	1	0	0	0	0	1	0	0	0	0	0	1	0	0	0	0	1	0	0	0	0	0	1	0
TGME49_210980	0	0	25	32.7778	0.0296053	0	0	24	24	0.04	0.434146	0	0	13	42.8492	0.0228055	0	0	25	36.0636	0.0269807	0.242547	0	0	16	30.3537	0.0318942	0.483914
TGME49_210990	0	0	0	0	1	0	0	0	0	1	0	0	0	0	0	1	0	0	0	0	1	0	0	0	0	0	1	0
TGME49_211000	0	0	0	0	1	0	0	0	0	1	0	0	0	0	0	1	0	0	2	2.88509	0.257395	-1.95795	0	0	0	0	1	0
TGME49_211010	0	0	6	7.86667	0.112782	0	0	3	3	0.25	1.14839	0	0	1	3.29609	0.23277	0	0	2	2.88509	0.257395	0.145078	0	0	4	7.58842	0.116436	-0.999369
TGME49_211015	4	5.24444	7	9.17778	0.613537	9	9	12	12	0.769231	0.326266	4	13.1844	2	6.59218	1.86829	15	21.6381	9	12.9829	1.61899	-0.206621	4	7.58842	5	9.48553	0.819074	-1.18965
TGME49_211020	4	5.24444	14	18.3556	0.322618	9	9	23	23	0.416667	0.369068	4	13.1844	7	23.0726	0.589232	15	21.6381	19	27.4083	0.796884	0.435535	4	7.58842	7	13.2797	0.601441	0.0295881
TGME49_211030	0	0	202	264.844	0.0037616	0	0	218	218	0.00456621	0.279651	0	0	60	197.765	0.00503106	0	0	207	298.606	0.00333771	-0.592002	0	0	149	282.669	0.00352524	-0.513141
TGME49_211040	0	0	395	517.889	0.00192719	0	0	459	459	0.00217391	0.173792	0	0	129	425.196	0.00234634	0	0	324	467.384	0.002135	-0.136176	0	0	278	527.395	0.00189252	-0.310103
TGME49_211050	0	0	0	0	1	0	0	0	0	1	0	0	0	0	0	1	0	0	0	0	1	0	0	0	0	0	1	0
TGME49_211060	50	65.5556	64	83.9111	0.783826	90	90	105	105	0.858491	0.131268	63	207.654	17	56.0335	3.65844	160	230.807	80	115.403	1.99141	-0.877438	50	94.8553	38	72.09	1.31147	-1.48004
TGME49_211070	50	65.5556	54	70.8	0.926958	90	90	98	98	0.919192	-0.0121372	63	207.654	14	46.1453	4.42576	160	230.807	76	109.633	2.09527	-1.07879	50	94.8553	31	58.8103	1.60266	-1.46546
TGME49_211080	0	0	0	0	1	0	0	0	0	1	0	0	0	0	0	1	0	0	0	0	1	0	0	0	0	0	1	0
TGME49_211090	0	0	7	9.17778	0.0982533	0	0	7	7	0.125	0.347351	0	0	3	9.88827	0.091842	0	0	7	10.0978	0.090108	-0.0274991	0	0	6	11.3826	0.0807582	-0.185544
TGME49_211150	0	0	4	5.24444	0.160142	0	0	9	9	0.1	-0.679355	0	0	2	6.59218	0.131714	0	0	9	12.9829	0.071516	-0.881076	0	0	2	3.79421	0.208585	0.66322
TGME49_211220	0	0	10	13.1111	0.0708661	1	1	8	8	0.222222	1.64883	0	0	5	16.4804	0.0572068	1	1.44254	4	5.77017	0.36078	2.65686	0	0	6	11.3826	0.0807582	0.497424
TGME49_211230	0	0	18	23.6	0.0406504	1	1	35	35	0.0555556	0.450661	0	0	9	29.6648	0.0326107	1	1.44254	20	28.8509	0.0818249	1.3272	0	0	12	22.7653	0.0420782	0.367729
TGME49_211240	0	0	10	13.1111	0.0708661	0	0	18	18	0.0526316	-0.429168	0	0	6	19.7765	0.0481312	0	0	10	14.4254	0.064828	0.429645	0	0	6	11.3826	0.0807582	0.746637
TGME49_211250	0	0	48	62.9333	0.0156413	0	0	60	60	0.0163934	0.0677591	0	0	22	72.514	0.0136029	0	0	47	67.7995	0.014535	0.0956201	0	0	28	53.119	0.0184778	0.441884
TGME49_211260	0	0	134	175.689	0.00565967	0	0	132	132	0.0075188	0.409785	0	0	56	184.581	0.00538848	0	0	106	152.91	0.00649732	0.269966	0	0	92	174.534	0.00569691	0.0803005
TGME49_211270	0	0	7	9.17778	0.0982533	0	0	4	4	0.2	1.02542	0	0	3	9.88827	0.091842	0	0	2	2.88509	0.257395	1.48676	0	0	5	9.48553	0.0953695	0.0543746
TGME49_211280	0	0	0	0	1	0	0	7	7	0.125	-3	0	0	0	0	1	0	0	11	15.868	0.059284	-4.07621	0	0	0	0	1	0
TGME49_211290	0	0	237	310.733	0.00320787	0	0	199	199	0.005	0.640312	0	0	92	303.24	0.00328688	0	0	163	235.134	0.00423488	0.365602	0	0	149	282.669	0.00352524	0.101003
TGME49_211300	0	0	17	22.2889	0.0429389	0	0	5	5	0.166667	1.95661	0	0	5	16.4804	0.0572068	0	0	12	17.3105	0.0546134	-0.0669302	0	0	9	17.074	0.0553282	-0.0481702
TGME49_211310	0	0	8	10.4889	0.0870406	0	0	9	9	0.1	0.200239	0	0	6	19.7765	0.0481312	0	0	4	5.77017	0.147707	1.61769	0	0	6	11.3826	0.0807582	0.746637
TGME49_211320	0	0	0	0	1	0	0	0	0	1	0	0	0	0	0	1	0	0	0	0	1	0	0	0	0	0	1	0
TGME49_211330	0	0	4	5.24444	0.160142	0	0	15	15	0.0625	-1.35743	0	0	4	13.1844	0.0705002	0	0	14	20.1956	0.0471796	-0.579464	0	0	3	5.69132	0.149447	1.08394
TGME49_211340	0	0	7	9.17778	0.0982533	0	0	13	13	0.0714286	-0.460004	0	0	4	13.1844	0.0705002	0	0	9	12.9829	0.071516	0.0206387	0	0	2	3.79421	0.208585	1.56494
TGME49_211350	0	0	8	10.4889	0.0870406	0	0	11	11	0.0833333	-0.0627951	0	0	6	19.7765	0.0481312	0	0	6	8.65526	0.103571	1.10557	0	0	7	13.2797	0.0700293	0.540985
TGME49_211360	0	0	0	0	1	0	0	0	0	1	0	0	0	0	0	1	0	0	0	0	1	0	0	0	0	0	1	0
TGME49_211370	0	0	5	6.55556	0.132353	0	0	3	3	0.25	0.917538	0	0	0	0	1	0	0	0	0	1	0	0	0	3	5.69132	0.149447	-2.74229
TGME49_211380	0	0	0	0	1	0	0	0	0	1	0	0	0	0	0	1	0	0	0	0	1	0	0	0	0	0	1	0
TGME49_211385	0	0	0	0	1	0	0	0	0	1	0	0	0	0	0	1	0	0	1	1.44254	0.409409	-1.28838	0	0	0	0	1	0
TGME49_211390	0	0	13	17.0444	0.0554187	0	0	4	4	0.2	1.85155	0	0	4	13.1844	0.0705002	0	0	11	15.868	0.059284	-0.249986	0	0	9	17.074	0.0553282	-0.349611
TGME49_211400	0	0	7	9.17778	0.0982533	0	0	4	4	0.2	1.02542	0	0	3	9.88827	0.091842	0	0	3	4.32763	0.187701	1.03121	0	0	4	7.58842	0.116436	0.342309
TGME49_211410	0	0	6	7.86667	0.112782	0	0	20	20	0.047619	-1.24393	0	0	4	13.1844	0.0705002	0	0	10	14.4254	0.064828	-0.12101	0	0	5	9.48553	0.0953695	0.435901
TGME49_211420	0	0	107	140.289	0.0070777	0	0	139	139	0.00714286	0.0132212	0	0	34	112.067	0.00884431	0	0	128	184.645	0.00538661	-0.715372	0	0	76	144.18	0.006888	-0.360665
TGME49_211430	0	0	0	0	1	0	0	0	0	1	0	0	0	0	0	1	0	0	2	2.88509	0.257395	-1.95795	0	0	0	0	1	0
TGME49_211440	0	0	8	10.4889	0.0870406	0	0	8	8	0.111111	0.352242	0	0	3	9.88827	0.091842	0	0	17	24.5232	0.03918	-1.22904	0	0	7	13.2797	0.0700293	-0.391195
TGME49_211450	0	0	3	3.93333	0.202703	0	0	5	5	0.166667	-0.2824	0	0	4	13.1844	0.0705002	0	0	3	4.32763	0.187701	1.41274	0	0	2	3.79421	0.208585	1.56494
TGME49_211460	0	0	43	56.3778	0.0174284	0	0	47	47	0.0208333	0.257458	0	0	18	59.3296	0.0165756	0	0	27	38.9487	0.0250321	0.594719	0	0	30	56.9132	0.0172672	0.0589744
TGME49_211470	0	0	2	2.62222	0.276074	0	0	5	5	0.166667	-0.728087	0	0	1	3.29609	0.23277	0	0	7	10.0978	0.090108	-1.36918	0	0	0	0	1	2.10302
TGME49_211480	0	0	1	1.31111	0.432692	0	0	15	15	0.0625	-2.79141	0	0	1	3.29609	0.23277	0	0	3	4.32763	0.187701	-0.310469	0	0	1	1.89711	0.345172	0.568411
TGME49_211600	0	0	11	14.4222	0.0648415	0	0	11	11	0.0833333	0.361976	0	0	5	16.4804	0.0572068	0	0	10	14.4254	0.064828	0.180432	0	0	7	13.2797	0.0700293	0.291772
TGME49_211610	0	0	10	13.1111	0.0708661	0	0	7	7	0.125	0.81876	0	0	8	26.3687	0.0365381	0	0	6	8.65526	0.103571	1.50314	0	0	6	11.3826	0.0807582	1.14421
TGME49_211630	0	0	182	238.622	0.00417324	0	0	163	163	0.00609756	0.547066	0	0	72	237.318	0.00419607	0	0	106	152.91	0.00649732	0.630808	0	0	129	244.727	0.00406956	-0.044164
TGME49_211640	0	0	4	5.24444	0.160142	0	0	3	3	0.25	0.642573	0	0	4	13.1844	0.0705002	0	0	3	4.32763	0.187701	1.41274	0	0	2	3.79421	0.208585	1.56494
TGME49_211650	0	0	10	13.1111	0.0708661	0	0	11	11	0.0833333	0.233797	0	0	4	13.1844	0.0705002	0	0	1	1.44254	0.409409	2.53785	0	0	5	9.48553	0.0953695	0.435901
TGME49_211660	0	0	0	0	1	0	0	0	0	1	0	0	0	0	0	1	0	0	0	0	1	0	0	0	0	0	1	0
TGME49_211670	0	0	17	22.2889	0.0429389	0	0	38	38	0.025641	-0.743832	0	0	12	39.5531	0.024659	0	0	28	40.3912	0.0241597	-0.0295128	0	0	10	18.9711	0.0500725	1.0219
TGME49_211675	0	0	1	1.31111	0.432692	0	0	18	18	0.0526316	-3.03934	0	0	0	0	1	0	0	33	47.6039	0.0205745	-5.603	0	0	1	1.89711	0.345172	-1.53461
TGME49_211680	0	0	1185	1553.67	0.000643225	0	0	1347	1347	0.00074184	0.205785	0	0	483	1592.01	0.000627742	0	0	1120	1615.65	0.000618564	-0.0212491	0	0	810	1536.66	0.000650341	0.0510237
TGME49_211690	0	0	19	24.9111	0.0385935	0	0	17	17	0.0555556	0.525574	0	0	6	19.7765	0.0481312	0	0	8	11.5403	0.0797426	0.728378	0	0	15	28.4566	0.0339483	-0.503635
TGME49_211695	0	0	1	1.31111	0.432692	0	0	4	4	0.2	-1.11334	0	0	1	3.29609	0.23277	0	0	1	1.44254	0.409409	0.81464	0	0	1	1.89711	0.345172	0.568411
TGME49_211700	0	0	8	10.4889	0.0870406	0	0	12	12	0.0769231	-0.178272	0	0	3	9.88827	0.091842	0	0	5	7.21271	0.121762	0.406844	0	0	6	11.3826	0.0807582	-0.185544
TGME49_211710	0	0	53	69.4889	0.0141866	0	0	106	106	0.00934579	-0.602143	0	0	15	49.4413	0.019825	0	0	64	92.3227	0.0107155	-0.887622	0	0	36	68.2958	0.0144309	-0.458162
TGME49_211720	0	0	55	72.1111	0.0136778	0	0	85	85	0.0116279	-0.234246	0	0	27	88.9944	0.0111118	0	0	29	41.8337	0.0233461	1.07109	0	0	37	70.1929	0.0140463	0.338102
TGME49_211730	0	0	21	27.5333	0.0350467	0	0	7	7	0.125	1.83458	0	0	13	42.8492	0.0228055	0	0	10	14.4254	0.064828	1.50724	0	0	16	30.3537	0.0318942	0.483914
TGME49_211850	0	0	80	104.889	0.00944386	2	2	126	126	0.023622	1.32269	0	0	28	92.2905	0.0107192	4	5.77017	60	86.5526	0.0773269	2.85077	0	0	53	100.547	0.00984769	-0.12234
TGME49_211860	0	0	17	22.2889	0.0429389	2	2	44	44	0.0666667	0.634679	0	0	4	13.1844	0.0705002	4	5.77017	21	30.2934	0.216345	1.61763	0	0	12	22.7653	0.0420782	-0.744554
TGME49_211870	4	5.24444	10	13.1111	0.44252	13	13	16	16	0.823529	0.896079	4	13.1844	5	16.4804	0.811441	17	24.5232	6	8.65526	2.64345	1.70387	4	7.58842	6	11.3826	0.693586	-0.226412
TGME49_211880	4	5.24444	6	7.86667	0.704261	13	13	13	13	1	0.505819	4	13.1844	0	0	14.1844	17	24.5232	4	5.77017	3.76995	-1.91168	4	7.58842	4	7.58842	1	-3.82623
TGME49_211890	0	0	4	5.24444	0.160142	0	0	6	6	0.142857	-0.164782	0	0	0	0	1	0	0	6	8.65526	0.103571	-3.27131	0	0	2	3.79421	0.208585	-2.26129
TGME49_211910	0	0	0	0	1	0	0	0	0	1	0	0	0	0	0	1	0	0	0	0	1	0	0	0	0	0	1	0
TGME49_211920	0	0	0	0	1	0	0	0	0	1	0	0	0	0	0	1	0	0	0	0	1	0	0	0	0	0	1	0
TGME49_212030	0	0	0	0	1	0	0	0	0	1	0	0	0	0	0	1	0	0	0	0	1	0	0	0	0	0	1	0
TGME49_212045	0	0	0	0	1	0	0	0	0	1	0	0	0	0	0	1	0	0	0	0	1	0	0	0	0	0	1	0
TGME49_212060	0	0	0	0	1	0	0	0	0	1	0	0	0	0	0	1	0	0	1	1.44254	0.409409	-1.28838	0	0	0	0	1	0
TGME49_212075	0	0	0	0	1	0	0	0	0	1	0	0	0	0	0	1	0	0	0	0	1	0	0	0	0	0	1	0
TGME49_212090	0	0	8	10.4889	0.0870406	0	0	9	9	0.1	0.200239	0	0	0	0	1	0	0	3	4.32763	0.187701	-2.41349	0	0	5	9.48553	0.0953695	-3.39033
TGME49_212100	0	0	2	2.62222	0.276074	0	0	2	2	0.333333	0.271913	0	0	0	0	1	0	0	9	12.9829	0.071516	-3.80559	0	0	0	0	1	0
TGME49_212110	0	0	0	0	1	0	0	1	1	0.5	-1	0	0	0	0	1	0	0	0	0	1	0	0	0	0	0	1	0
TGME49_212130	0	0	11	14.4222	0.0648415	0	0	14	14	0.0666667	0.0400482	0	0	8	26.3687	0.0365381	0	0	8	11.5403	0.0797426	1.12595	0	0	8	15.1768	0.0618167	0.758597
TGME49_212140	0	0	15	19.6667	0.0483871	0	0	18	18	0.0526316	0.121306	0	0	4	13.1844	0.0705002	0	0	11	15.868	0.059284	-0.249986	0	0	12	22.7653	0.0420782	-0.744554
TGME49_212145	1	1.31111	1	1.31111	1	0	0	0	0	1	0	1	3.29609	0	0	4.29609	0	0	0	0	1	-2.10302	1	1.89711	1	1.89711	1	-2.10302
TGME49_212150	1	1.31111	7	9.17778	0.227074	0	0	5	5	0.166667	-0.446198	1	3.29609	5	16.4804	0.245765	0	0	8	11.5403	0.0797426	-1.62386	1	1.89711	6	11.3826	0.233965	-0.070988
TGME49_212160	0	0	2	2.62222	0.276074	0	0	9	9	0.1	-1.46505	0	0	1	3.29609	0.23277	0	0	6	8.65526	0.103571	-1.16829	0	0	2	3.79421	0.208585	-0.15827
TGME49_212170	0	0	13	17.0444	0.0554187	0	0	22	22	0.0434783	-0.350079	0	0	3	9.88827	0.091842	0	0	15	21.6381	0.0441732	-1.05598	0	0	11	20.8682	0.0457286	-1.00606
TGME49_212180	0	0	1	1.31111	0.432692	0	0	4	4	0.2	-1.11334	0	0	0	0	1	0	0	0	0	1	0	0	0	0	0	1	0
TGME49_212190	0	0	27	35.4	0.0274725	0	0	17	17	0.0555556	1.01594	0	0	8	26.3687	0.0365381	0	0	10	14.4254	0.064828	0.827217	0	0	21	39.8392	0.0244863	-0.577428
TGME49_212200	0	0	12	15.7333	0.059761	0	0	13	13	0.0714286	0.257298	0	0	10	32.9609	0.0294456	0	0	4	5.77017	0.147707	2.32661	0	0	8	15.1768	0.0618167	1.06994
TGME49_212210	0	0	70	91.7778	0.0107784	0	0	75	75	0.0131579	0.28778	0	0	16	52.7374	0.018609	0	0	44	63.4719	0.0155106	-0.262743	0	0	53	100.547	0.00984769	-0.918143
TGME49_212220	0	0	38	49.8222	0.0196764	0	0	31	31	0.03125	0.667388	0	0	8	26.3687	0.0365381	0	0	26	37.5061	0.0259699	-0.49256	0	0	28	53.119	0.0184778	-0.983607
TGME49_212230	0	0	0	0	1	0	0	0	0	1	0	0	0	0	0	1	0	0	0	0	1	0	0	0	0	0	1	0
TGME49_212240	0	0	0	0	1	0	0	2	2	0.333333	-1.58496	0	0	0	0	1	0	0	1	1.44254	0.409409	-1.28838	0	0	0	0	1	0
TGME49_212250	0	0	50	65.5556	0.015025	0	0	58	58	0.0169492	0.173844	0	0	26	85.6983	0.0115342	0	0	28	40.3912	0.0241597	1.06668	0	0	29	55.0161	0.017852	0.630163
TGME49_212260	0	0	46	60.3111	0.0163103	0	0	61	61	0.016129	-0.0161197	0	0	25	82.4022	0.0119901	0	0	44	63.4719	0.0155106	0.371416	0	0	33	62.6045	0.0157222	0.390957
TGME49_212270	0	0	318	416.933	0.00239273	0	0	683	683	0.00146199	-0.710723	0	0	147	484.525	0.00205963	0	0	425	613.081	0.00162845	-0.338882	0	0	217	411.672	0.00242323	0.23455
TGME49_212275	0	0	0	0	1	0	0	1	1	0.5	-1	0	0	0	0	1	0	0	0	0	1	0	0	0	0	0	1	0
TGME49_212280	0	0	1	1.31111	0.432692	0	0	6	6	0.142857	-1.59877	0	0	0	0	1	0	0	2	2.88509	0.257395	-1.95795	0	0	0	0	1	0
TGME49_212290	0	0	1703	2232.82	0.000447663	0	0	2292	2292	0.00043611	-0.037722	0	0	640	2109.5	0.000473822	0	0	1819	2623.99	0.000380955	-0.314726	0	0	1170	2219.61	0.000450326	-0.0733758
TGME49_212300	0	0	97	127.178	0.00780166	0	0	137	137	0.00724638	-0.106522	0	0	36	118.659	0.00835707	0	0	88	126.944	0.00781593	-0.0965783	0	0	62	117.621	0.00843024	0.0125772
TGME49_212310	0	0	334	437.911	0.00227837	0	0	337	337	0.00295858	0.376906	0	0	117	385.642	0.00258637	0	0	199	287.066	0.00347143	0.424601	0	0	214	405.981	0.00245712	-0.0739603
TGME49_212410	2	2.62222	2	2.62222	1	1	1	1	1	1	0	2	6.59218	0	0	7.59218	1	1.44254	0	0	2.44254	-1.63613	2	3.79421	2	3.79421	1	-2.92451
TGME49_212420	2	2.62222	2	2.62222	1	1	1	2	2	0.666667	-0.584963	2	6.59218	0	0	7.59218	1	1.44254	0	0	2.44254	-1.63613	2	3.79421	2	3.79421	1	-2.92451
TGME49_212710	0	0	0	0	1	0	0	0	0	1	0	0	0	0	0	1	0	0	0	0	1	0	0	0	0	0	1	0
TGME49_212725	0	0	16	20.9778	0.0455005	0	0	12	12	0.0769231	0.757534	0	0	3	9.88827	0.091842	0	0	12	17.3105	0.0546134	-0.749898	0	0	12	22.7653	0.0420782	-1.12608
TGME49_212735	0	0	0	0	1	0	0	0	0	1	0	0	0	0	0	1	0	0	1	1.44254	0.409409	-1.28838	0	0	0	0	1	0
TGME49_212740	0	0	0	0	1	0	0	3	3	0.25	-2	0	0	0	0	1	0	0	1	1.44254	0.409409	-1.28838	0	0	0	0	1	0
TGME49_212750	0	0	0	0	1	0	0	0	0	1	0	0	0	0	0	1	0	0	0	0	1	0	0	0	0	0	1	0
TGME49_212760	0	0	7	9.17778	0.0982533	0	0	8	8	0.111111	0.177426	0	0	3	9.88827	0.091842	0	0	7	10.0978	0.090108	-0.0274991	0	0	6	11.3826	0.0807582	-0.185544
TGME49_212770	0	0	162	212.4	0.00468604	0	0	155	155	0.00641026	0.452014	0	0	71	234.022	0.00425491	0	0	132	190.416	0.00522423	0.296089	0	0	110	208.682	0.00476913	0.164597
TGME49_212775	0	0	0	0	1	0	0	0	0	1	0	0	0	0	0	1	0	0	0	0	1	0	0	0	0	0	1	0
TGME49_212780	0	0	20	26.2222	0.0367347	0	0	26	26	0.037037	0.0118254	0	0	13	42.8492	0.0228055	0	0	17	24.5232	0.03918	0.780739	0	0	14	26.5595	0.0362851	0.67
TGME49_212800	0	0	12	15.7333	0.059761	0	0	12	12	0.0769231	0.364213	0	0	9	29.6648	0.0326107	0	0	10	14.4254	0.064828	0.991273	0	0	9	17.074	0.0553282	0.762672
TGME49_212810	0	0	0	0	1	0	0	0	0	1	0	0	0	0	0	1	0	0	2	2.88509	0.257395	-1.95795	0	0	0	0	1	0
TGME49_212820	0	0	12	15.7333	0.059761	0	0	7	7	0.125	1.06465	0	0	2	6.59218	0.131714	1	1.44254	11	15.868	0.144804	0.136683	0	0	7	13.2797	0.0700293	-0.911384
TGME49_212830	0	0	0	0	1	0	0	1	1	0.5	-1	0	0	0	0	1	1	1.44254	2	2.88509	0.628697	-0.669563	0	0	0	0	1	0
TGME49_212840	0	0	13	17.0444	0.0554187	0	0	13	13	0.0714286	0.366128	0	0	3	9.88827	0.091842	0	0	5	7.21271	0.121762	0.406844	0	0	9	17.074	0.0553282	-0.731138
TGME49_212850	0	0	34	44.5778	0.0219405	0	0	45	45	0.0217391	-0.0133033	0	0	13	42.8492	0.0228055	0	0	32	46.1614	0.0212038	-0.105056	0	0	26	49.3248	0.0198709	-0.198719
TGME49_212860	0	0	4	5.24444	0.160142	0	0	7	7	0.125	-0.357427	0	0	6	19.7765	0.0481312	0	0	2	2.88509	0.257395	2.41894	0	0	3	5.69132	0.149447	1.63459
TGME49_212880	0	0	17	22.2889	0.0429389	0	0	15	15	0.0625	0.54157	0	0	16	52.7374	0.018609	0	0	11	15.868	0.059284	1.67164	0	0	13	24.6624	0.0389675	1.06627
TGME49_212900	0	0	11	14.4222	0.0648415	0	0	31	31	0.03125	-1.05306	0	0	7	23.0726	0.041541	0	0	16	23.0807	0.0415271	-0.000482897	0	0	7	13.2797	0.0700293	0.753424
TGME49_212910	0	0	0	0	1	0	0	5	5	0.166667	-2.58496	0	0	0	0	1	0	0	2	2.88509	0.257395	-1.95795	0	0	0	0	1	0
TGME49_212920	0	0	29	38.0222	0.0256264	1	1	30	30	0.0645161	1.33203	0	0	13	42.8492	0.0228055	1	1.44254	26	37.5061	0.0634326	1.47585	0	0	16	30.3537	0.0318942	0.483914
TGME49_212930	0	0	17	22.2889	0.0429389	0	0	22	22	0.0434783	0.0180079	0	0	9	29.6648	0.0326107	0	0	18	25.9658	0.0370841	0.185455	0	0	10	18.9711	0.0500725	0.618673
TGME49_212937	0	0	0	0	1	1	1	1	1	1	0	0	0	0	0	1	1	1.44254	0	0	2.44254	1.28838	0	0	0	0	1	0
TGME49_212940	0	0	8	10.4889	0.0870406	0	0	4	4	0.2	1.20024	0	0	3	9.88827	0.091842	0	0	3	4.32763	0.187701	1.03121	0	0	5	9.48553	0.0953695	0.0543746
TGME49_212950	0	0	15	19.6667	0.0483871	0	0	8	8	0.111111	1.19931	0	0	6	19.7765	0.0481312	0	0	8	11.5403	0.0797426	0.728378	0	0	8	15.1768	0.0618167	0.361025
TGME49_212955	4	5.24444	5	6.55556	0.826471	5	5	5	5	1	0.274965	5	16.4804	2	6.59218	2.30243	8	11.5403	4	5.77017	1.85229	-0.313844	4	7.58842	3	5.69132	1.28352	-0.843053
TGME49_212960	4	5.24444	11	14.4222	0.404899	5	5	13	13	0.428571	0.0819731	5	16.4804	7	23.0726	0.726155	8	11.5403	16	23.0807	0.520764	-0.479648	4	7.58842	8	15.1768	0.530908	-0.451814
TGME49_212970	0	0	0	0	1	0	0	2	2	0.333333	-1.58496	0	0	1	3.29609	0.23277	0	0	2	2.88509	0.257395	0.145078	0	0	0	0	1	2.10302
TGME49_212980	0	0	105	137.667	0.00721154	0	0	138	138	0.00719424	-0.00346386	0	0	53	174.693	0.00569175	0	0	83	119.731	0.00828287	0.541258	0	0	70	132.797	0.00747399	0.393004
TGME49_212990	0	0	8	10.4889	0.0870406	0	0	19	19	0.05	-0.799761	0	0	5	16.4804	0.0572068	0	0	5	7.21271	0.121762	1.08981	0	0	7	13.2797	0.0700293	0.291772
TGME49_213000	0	0	13	17.0444	0.0554187	0	0	18	18	0.0526316	-0.0744447	0	0	8	26.3687	0.0365381	0	0	12	17.3105	0.0546134	0.579855	0	0	7	13.2797	0.0700293	0.938558
TGME49_213010	0	0	19	24.9111	0.0385935	0	0	16	16	0.0588235	0.608036	0	0	7	23.0726	0.041541	0	0	11	15.868	0.059284	0.513107	0	0	12	22.7653	0.0420782	0.0185385
TGME49_213020	0	0	7	9.17778	0.0982533	0	0	6	6	0.142857	0.539996	0	0	6	19.7765	0.0481312	0	0	6	8.65526	0.103571	1.10557	0	0	2	3.79421	0.208585	2.11559
TGME49_213030	0	0	46	60.3111	0.0163103	0	0	53	53	0.0185185	0.183189	0	0	13	42.8492	0.0228055	0	0	21	30.2934	0.0319556	0.486691	0	0	32	60.7074	0.0162055	-0.492894
TGME49_213040	0	0	8	10.4889	0.0870406	0	0	9	9	0.1	0.200239	0	0	2	6.59218	0.131714	0	0	7	10.0978	0.090108	-0.547688	0	0	4	7.58842	0.116436	-0.17788
TGME49_213050	0	0	306	401.2	0.00248633	0	0	531	531	0.0018797	-0.403513	0	0	104	342.793	0.00290872	0	0	289	416.895	0.00239295	-0.281599	0	0	199	377.524	0.00264184	-0.138844
TGME49_213060	0	0	11	14.4222	0.0648415	1	1	14	14	0.133333	1.04005	1	3.29609	5	16.4804	0.245765	2	2.88509	4	5.77017	0.573853	1.2234	0	0	6	11.3826	0.0807582	-1.6056
TGME49_213065	0	0	10	13.1111	0.0708661	1	1	11	11	0.166667	1.2338	1	3.29609	5	16.4804	0.245765	2	2.88509	3	4.32763	0.729234	1.5691	0	0	6	11.3826	0.0807582	-1.6056
TGME49_213067	0	0	10	13.1111	0.0708661	0	0	5	5	0.166667	1.2338	0	0	3	9.88827	0.091842	0	0	1	1.44254	0.409409	2.15632	0	0	6	11.3826	0.0807582	-0.185544
TGME49_213069	0	0	2	2.62222	0.276074	0	0	2	2	0.333333	0.271913	0	0	0	0	1	0	0	0	0	1	0	0	0	1	1.89711	0.345172	-1.53461
TGME49_213072	0	0	4	5.24444	0.160142	0	0	4	4	0.2	0.320645	0	0	7	23.0726	0.041541	0	0	5	7.21271	0.121762	1.55146	0	0	3	5.69132	0.149447	1.84703
TGME49_213100	0	0	2	2.62222	0.276074	0	0	5	5	0.166667	-0.728087	0	0	2	6.59218	0.131714	0	0	3	4.32763	0.187701	0.511021	0	0	1	1.89711	0.345172	1.3899
TGME49_213115	0	0	1	1.31111	0.432692	0	0	4	4	0.2	-1.11334	0	0	2	6.59218	0.131714	0	0	2	2.88509	0.257395	0.966568	0	0	1	1.89711	0.345172	1.3899
TGME49_213240	0	0	6	7.86667	0.112782	0	0	2	2	0.333333	1.56343	0	0	2	6.59218	0.131714	0	0	6	8.65526	0.103571	-0.346801	0	0	5	9.48553	0.0953695	-0.465814
TGME49_213255	0	0	0	0	1	0	0	10	10	0.0909091	-3.45943	0	0	0	0	1	0	0	9	12.9829	0.071516	-3.80559	0	0	0	0	1	0
TGME49_213280	0	0	497	651.622	0.00153228	0	0	737	737	0.00135501	-0.177373	0	0	212	698.771	0.00142904	0	0	347	500.562	0.00199377	0.480454	0	0	352	667.781	0.00149526	0.0653482
TGME49_213290	0	0	0	0	1	0	0	0	0	1	0	0	0	0	0	1	0	0	1	1.44254	0.409409	-1.28838	0	0	0	0	1	0
TGME49_213300	0	0	9	11.8	0.078125	0	0	5	5	0.166667	1.09311	0	0	8	26.3687	0.0365381	0	0	4	5.77017	0.147707	2.01526	0	0	6	11.3826	0.0807582	1.14421
TGME49_213310	0	0	5	6.55556	0.132353	0	0	6	6	0.142857	0.110183	0	0	7	23.0726	0.041541	0	0	5	7.21271	0.121762	1.55146	0	0	4	7.58842	0.116436	1.48693
TGME49_213325	0	0	9	11.8	0.078125	0	0	5	5	0.166667	1.09311	0	0	3	9.88827	0.091842	0	0	7	10.0978	0.090108	-0.0274991	0	0	9	17.074	0.0553282	-0.731138
TGME49_213340	0	0	0	0	1	1	1	5	5	0.333333	-1.58496	0	0	0	0	1	4	5.77017	17	24.5232	0.265255	-1.91455	0	0	0	0	1	0
TGME49_213350	0	0	1657	2172.51	0.000460085	1	1	2192	2192	0.000911993	0.987122	0	0	600	1977.65	0.000505394	4	5.77017	1437	2072.93	0.00326441	2.69134	0	0	1107	2100.1	0.000475942	-0.0866233
TGME49_213360	0	0	0	0	1	0	0	0	0	1	0	0	0	0	0	1	0	0	1	1.44254	0.409409	-1.28838	0	0	0	0	1	0
TGME49_213370	0	0	11	14.4222	0.0648415	0	0	7	7	0.125	0.946939	0	0	5	16.4804	0.0572068	0	0	9	12.9829	0.071516	0.32208	0	0	8	15.1768	0.0618167	0.111811
TGME49_213380	0	0	1	1.31111	0.432692	0	0	0	0	1	1.20859	0	0	0	0	1	0	0	0	0	1	0	0	0	0	0	1	0
TGME49_213388	0	0	6	7.86667	0.112782	0	0	6	6	0.142857	0.341037	0	0	3	9.88827	0.091842	0	0	7	10.0978	0.090108	-0.0274991	0	0	5	9.48553	0.0953695	0.0543746
TGME49_213392	0	0	20	26.2222	0.0367347	0	0	25	25	0.0384615	0.0662732	0	0	14	46.1453	0.021211	0	0	12	17.3105	0.0546134	1.36444	0	0	15	28.4566	0.0339483	0.678522
TGME49_213400	0	0	12	15.7333	0.059761	0	0	17	17	0.0555556	-0.105272	0	0	9	29.6648	0.0326107	0	0	9	12.9829	0.071516	1.13292	0	0	8	15.1768	0.0618167	0.922653
TGME49_213410	0	0	49	64.2444	0.015327	0	0	101	101	0.00980392	-0.644642	0	0	22	72.514	0.0136029	0	0	80	115.403	0.00859081	-0.663043	0	0	35	66.3987	0.0148371	0.125297
TGME49_213415	2	2.62222	5	6.55556	0.479412	5	5	10	10	0.545455	0.186194	2	6.59218	2	6.59218	1	6	8.65526	2	2.88509	2.48521	1.31337	2	3.79421	2	3.79421	1	0
TGME49_213420	2	2.62222	6	7.86667	0.408521	5	5	9	9	0.6	0.554551	2	6.59218	1	3.29609	1.76723	6	8.65526	2	2.88509	2.48521	0.491878	2	3.79421	3	5.69132	0.716482	-1.30249
TGME49_213430	0	0	0	0	1	0	0	0	0	1	0	0	0	0	0	1	0	0	0	0	1	0	0	0	0	0	1	0
TGME49_213445	0	0	64	83.9111	0.011777	0	0	116	116	0.00854701	-0.462483	0	0	11	36.257	0.0268406	0	0	86	124.059	0.00799625	-1.74702	0	0	40	75.8842	0.0130066	-1.04518
TGME49_213460	0	0	10	13.1111	0.0708661	0	0	10	10	0.0909091	0.359328	0	0	0	0	1	0	0	10	14.4254	0.064828	-3.94724	0	0	7	13.2797	0.0700293	-3.8359
TGME49_213480	0	0	2	2.62222	0.276074	0	0	5	5	0.166667	-0.728087	0	0	0	0	1	0	0	0	0	1	0	0	0	2	3.79421	0.208585	-2.26129
TGME49_213490	0	0	18	23.6	0.0406504	0	0	24	24	0.04	-0.0232698	0	0	6	19.7765	0.0481312	0	0	23	33.1785	0.0292582	-0.718133	0	0	11	20.8682	0.0457286	-0.0738772
TGME49_213500	0	0	0	0	1	0	0	0	0	1	0	0	0	0	0	1	0	0	0	0	1	0	0	0	0	0	1	0
TGME49_213510	0	0	0	0	1	0	0	0	0	1	0	0	0	0	0	1	0	0	0	0	1	0	0	0	0	0	1	0
TGME49_213520	0	0	19	24.9111	0.0385935	0	0	27	27	0.0357143	-0.111856	0	0	6	19.7765	0.0481312	0	0	15	21.6381	0.0441732	-0.1238	0	0	14	26.5595	0.0362851	-0.407594
TGME49_213530	0	0	0	0	1	0	0	1	1	0.5	-1	0	0	0	0	1	0	0	0	0	1	0	0	0	0	0	1	0
TGME49_213550	0	0	13	17.0444	0.0554187	0	0	21	21	0.0454545	-0.285949	0	0	3	9.88827	0.091842	0	0	12	17.3105	0.0546134	-0.749898	0	0	8	15.1768	0.0618167	-0.571156
TGME49_213560	0	0	0	0	1	0	0	0	0	1	0	0	0	0	0	1	0	0	0	0	1	0	0	0	0	0	1	0
TGME49_213570	0	0	86	112.756	0.00879078	0	0	172	172	0.00578035	-0.604835	0	0	38	125.251	0.0079207	0	0	110	158.68	0.00626254	-0.338882	0	0	67	127.106	0.00780603	-0.0210399
TGME49_213580	0	0	1197	1569.4	0.00063678	0	0	1602	1602	0.00062383	-0.0296423	0	0	442	1456.87	0.000685932	0	0	1236	1782.98	0.000560543	-0.291238	0	0	798	1513.89	0.000660114	-0.0553501
TGME49_213590	0	0	71	93.0889	0.0106282	0	0	92	92	0.0107527	0.0167936	0	0	16	52.7374	0.018609	0	0	60	86.5526	0.0114217	-0.704222	0	0	50	94.8553	0.0104324	-0.834931
TGME49_213600	0	0	5	6.55556	0.132353	0	0	12	12	0.0769231	-0.782902	0	0	2	6.59218	0.131714	0	0	2	2.88509	0.257395	0.966568	0	0	2	3.79421	0.208585	0.66322
TGME49_213610	0	0	46	60.3111	0.0163103	0	0	43	43	0.0227273	0.478645	0	0	12	39.5531	0.024659	0	0	24	34.621	0.0280733	0.187082	0	0	29	55.0161	0.017852	-0.46603
TGME49_213620	0	0	9	11.8	0.078125	0	0	13	13	0.0714286	-0.129283	0	0	5	16.4804	0.0572068	0	0	8	11.5403	0.0797426	0.479165	0	0	4	7.58842	0.116436	1.02528
TGME49_213635	0	0	2	2.62222	0.276074	0	0	6	6	0.142857	-0.95048	0	0	0	0	1	0	0	3	4.32763	0.187701	-2.41349	0	0	1	1.89711	0.345172	-1.53461
TGME49_213650	0	0	23	30.1556	0.032097	0	0	45	45	0.0217391	-0.562144	0	0	7	23.0726	0.041541	0	0	18	25.9658	0.0370841	-0.163736	0	0	16	30.3537	0.0318942	-0.381242
TGME49_213660	0	0	97	127.178	0.00780166	0	0	103	103	0.00961538	0.301563	0	0	27	88.9944	0.0111118	0	0	53	76.4548	0.0129108	0.216481	0	0	60	113.826	0.0087088	-0.351547
TGME49_213670	0	0	21	27.5333	0.0350467	0	0	29	29	0.0333333	-0.0723142	0	0	12	39.5531	0.024659	0	0	20	28.8509	0.0334999	0.442039	0	0	14	26.5595	0.0362851	0.557262
TGME49_213680	0	0	13	17.0444	0.0554187	0	0	13	13	0.0714286	0.366128	0	0	6	19.7765	0.0481312	0	0	3	4.32763	0.187701	1.96339	0	0	8	15.1768	0.0618167	0.361025
TGME49_213690	0	0	24	31.4667	0.0308008	0	0	33	33	0.0294118	-0.0665755	0	0	10	32.9609	0.0294456	0	0	28	40.3912	0.0241597	-0.28545	0	0	14	26.5595	0.0362851	0.301325
TGME49_213700	0	0	1	1.31111	0.432692	0	0	7	7	0.125	-1.79141	0	0	0	0	1	0	0	4	5.77017	0.147707	-2.75919	0	0	1	1.89711	0.345172	-1.53461
TGME49_213710	0	0	21	27.5333	0.0350467	0	0	19	19	0.05	0.512648	0	0	6	19.7765	0.0481312	0	0	5	7.21271	0.121762	1.33902	0	0	13	24.6624	0.0389675	-0.3047
TGME49_213720	0	0	7	9.17778	0.0982533	0	0	7	7	0.125	0.347351	0	0	0	0	1	0	0	3	4.32763	0.187701	-2.41349	0	0	6	11.3826	0.0807582	-3.63025
TGME49_213730	0	0	47	61.6222	0.0159688	0	0	54	54	0.0181818	0.187243	0	0	9	29.6648	0.0326107	0	0	36	51.9315	0.0188923	-0.787544	0	0	33	62.6045	0.0157222	-1.05255
TGME49_213740	0	0	13	17.0444	0.0554187	0	0	20	20	0.047619	-0.218835	0	0	5	16.4804	0.0572068	0	0	15	21.6381	0.0441732	-0.373013	0	0	7	13.2797	0.0700293	0.291772
TGME49_213746	0	0	11	14.4222	0.0648415	0	0	22	22	0.0434783	-0.576623	0	0	1	3.29609	0.23277	0	0	9	12.9829	0.071516	-1.70257	0	0	10	18.9711	0.0500725	-2.21682
TGME49_213748	0	0	6	7.86667	0.112782	0	0	10	10	0.0909091	-0.31104	0	0	1	3.29609	0.23277	0	0	8	11.5403	0.0797426	-1.54548	0	0	6	11.3826	0.0807582	-1.52722
TGME49_213752	0	0	5	6.55556	0.132353	0	0	4	4	0.2	0.59561	0	0	0	0	1	0	0	4	5.77017	0.147707	-2.75919	0	0	3	5.69132	0.149447	-2.74229
TGME49_213760	0	0	0	0	1	0	0	0	0	1	0	0	0	0	0	1	0	0	1	1.44254	0.409409	-1.28838	0	0	0	0	1	0
TGME49_213770	0	0	9	11.8	0.078125	0	0	20	20	0.047619	-0.714246	0	0	9	29.6648	0.0326107	0	0	13	18.7531	0.0506251	0.634508	0	0	8	15.1768	0.0618167	0.922653
TGME49_213780	0	0	2	2.62222	0.276074	0	0	5	5	0.166667	-0.728087	0	0	0	0	1	0	0	3	4.32763	0.187701	-2.41349	0	0	0	0	1	0
TGME49_213790	0	0	6	7.86667	0.112782	0	0	7	7	0.125	0.148392	0	0	3	9.88827	0.091842	0	0	10	14.4254	0.064828	-0.502536	0	0	5	9.48553	0.0953695	0.0543746
TGME49_213800	0	0	14	18.3556	0.0516648	0	0	19	19	0.05	-0.0472523	0	0	6	19.7765	0.0481312	0	0	12	17.3105	0.0546134	0.182283	0	0	8	15.1768	0.0618167	0.361025
TGME49_213810	0	0	1	1.31111	0.432692	0	0	15	15	0.0625	-2.79141	0	0	0	0	1	0	0	8	11.5403	0.0797426	-3.6485	0	0	0	0	1	0
TGME49_213820	0	0	9	11.8	0.078125	0	0	18	18	0.0526316	-0.569856	0	0	1	3.29609	0.23277	0	0	3	4.32763	0.187701	-0.310469	0	0	8	15.1768	0.0618167	-1.91283
TGME49_213830	0	0	47	61.6222	0.0159688	0	0	23	23	0.0416667	1.38364	0	0	20	65.9218	0.0149428	0	0	29	41.8337	0.0233461	0.643728	0	0	27	51.2219	0.0191491	0.357822
TGME49_213840	0	0	2	2.62222	0.276074	0	0	2	2	0.333333	0.271913	0	0	0	0	1	0	0	0	0	1	0	0	0	2	3.79421	0.208585	-2.26129
TGME49_213850	0	0	0	0	1	0	0	1	1	0.5	-1	0	0	0	0	1	0	0	1	1.44254	0.409409	-1.28838	0	0	0	0	1	0
TGME49_213860	0	0	0	0	1	0	0	0	0	1	0	0	0	0	0	1	0	0	0	0	1	0	0	0	0	0	1	0
TGME49_213870	0	0	17	22.2889	0.0429389	0	0	24	24	0.04	-0.102286	0	0	7	23.0726	0.041541	0	0	10	14.4254	0.064828	0.642083	0	0	12	22.7653	0.0420782	0.0185385
TGME49_213880	0	0	3	3.93333	0.202703	0	0	2	2	0.333333	0.7176	0	0	5	16.4804	0.0572068	0	0	3	4.32763	0.187701	1.71418	0	0	3	5.69132	0.149447	1.38538
TGME49_213885	1	1.31111	1	1.31111	1	2	2	2	2	1	0	1	3.29609	0	0	4.29609	5	7.21271	3	4.32763	1.54153	-1.47866	1	1.89711	1	1.89711	1	-2.10302
TGME49_213890	1	1.31111	9	11.8	0.180556	2	2	9	9	0.3	0.73252	1	3.29609	1	3.29609	1	5	7.21271	9	12.9829	0.58734	-0.767731	1	1.89711	6	11.3826	0.233965	-2.09563
TGME49_213900	0	0	20	26.2222	0.0367347	0	0	20	20	0.047619	0.374396	0	0	10	32.9609	0.0294456	0	0	23	33.1785	0.0292582	-0.00921398	0	0	11	20.8682	0.0457286	0.635042
TGME49_213910	0	0	5	6.55556	0.132353	0	0	9	9	0.1	-0.40439	0	0	8	26.3687	0.0365381	0	0	5	7.21271	0.121762	1.7366	0	0	2	3.79421	0.208585	2.51316
TGME49_213920	0	0	11	14.4222	0.0648415	0	0	5	5	0.166667	1.36198	0	0	6	19.7765	0.0481312	0	0	6	8.65526	0.103571	1.10557	0	0	8	15.1768	0.0618167	0.361025
TGME49_213930	0	0	3	3.93333	0.202703	0	0	7	7	0.125	-0.697437	0	0	1	3.29609	0.23277	0	0	8	11.5403	0.0797426	-1.54548	0	0	2	3.79421	0.208585	-0.15827
TGME49_213940	0	0	497	651.622	0.00153228	0	0	922	922	0.00108342	-0.500083	0	0	184	606.48	0.00164614	0	0	630	908.802	0.00109914	-0.582715	0	0	317	601.383	0.00166007	0.0121578
TGME49_213950	0	0	15	19.6667	0.0483871	0	0	19	19	0.05	0.0473057	0	0	6	19.7765	0.0481312	0	0	5	7.21271	0.121762	1.33902	0	0	11	20.8682	0.0457286	-0.0738772
TGME49_213960	0	0	0	0	1	0	0	0	0	1	0	0	0	0	0	1	0	0	0	0	1	0	0	0	0	0	1	0
TGME49_213970	0	0	7	9.17778	0.0982533	0	0	19	19	0.05	-0.974577	0	0	13	42.8492	0.0228055	0	0	21	30.2934	0.0319556	0.486691	0	0	6	11.3826	0.0807582	1.82423
TGME49_214070	0	0	0	0	1	0	0	0	0	1	0	0	0	0	0	1	0	0	0	0	1	0	0	0	0	0	1	0
TGME49_214080	0	0	432	566.4	0.00176243	0	0	233	233	0.0042735	1.27786	0	0	180	593.296	0.00168266	0	0	224	323.13	0.00308519	0.874611	0	0	289	548.264	0.00182062	0.113683
TGME49_214090	0	0	12	15.7333	0.059761	0	0	13	13	0.0714286	0.257298	0	0	2	6.59218	0.131714	0	0	7	10.0978	0.090108	-0.547688	0	0	11	20.8682	0.0457286	-1.52625
TGME49_214100	0	0	32	41.9556	0.0232799	0	0	28	28	0.0344828	0.566792	0	0	12	39.5531	0.024659	0	0	16	23.0807	0.0415271	0.751935	0	0	26	49.3248	0.0198709	-0.311457
TGME49_214110	0	0	8	10.4889	0.0870406	0	0	12	12	0.0769231	-0.178272	0	0	3	9.88827	0.091842	0	0	3	4.32763	0.187701	1.03121	0	0	7	13.2797	0.0700293	-0.391195
TGME49_214115	0	0	0	0	1	0	0	0	0	1	0	0	0	0	0	1	0	0	0	0	1	0	0	0	0	0	1	0
TGME49_214120	0	0	3	3.93333	0.202703	0	0	2	2	0.333333	0.7176	0	0	1	3.29609	0.23277	0	0	1	1.44254	0.409409	0.81464	0	0	0	0	1	2.10302
TGME49_214130	0	0	9	11.8	0.078125	0	0	9	9	0.1	0.356144	0	0	4	13.1844	0.0705002	0	0	4	5.77017	0.147707	1.06704	0	0	8	15.1768	0.0618167	-0.18963
TGME49_214140	0	0	31	40.6444	0.0240128	0	0	36	36	0.027027	0.170599	0	0	11	36.257	0.0268406	0	0	24	34.621	0.0280733	0.0647818	0	0	23	43.6334	0.0224047	-0.260614
TGME49_214150	0	0	14	18.3556	0.0516648	0	0	27	27	0.0357143	-0.532679	0	0	10	32.9609	0.0294456	0	0	13	18.7531	0.0506251	0.781799	0	0	11	20.8682	0.0457286	0.635042
TGME49_214160	0	0	0	0	1	0	0	0	0	1	0	0	0	0	0	1	0	0	0	0	1	0	0	0	0	0	1	0
TGME49_214170	0	0	8	10.4889	0.0870406	0	0	5	5	0.166667	0.937205	0	0	0	0	1	0	0	11	15.868	0.059284	-4.07621	0	0	4	7.58842	0.116436	-3.10239
TGME49_214180	0	0	36	47.2	0.0207469	0	0	35	35	0.0277778	0.421036	0	0	15	49.4413	0.019825	0	0	19	27.4083	0.035201	0.828293	0	0	27	51.2219	0.0191491	-0.0500474
TGME49_214190	0	0	8	10.4889	0.0870406	0	0	8	8	0.111111	0.352242	0	0	1	3.29609	0.23277	0	0	12	17.3105	0.0546134	-2.09158	0	0	7	13.2797	0.0700293	-1.73287
TGME49_214200	0	0	6	7.86667	0.112782	0	0	11	11	0.0833333	-0.436571	0	0	1	3.29609	0.23277	0	0	13	18.7531	0.0506251	-2.20098	0	0	5	9.48553	0.0953695	-1.2873
TGME49_214210	0	0	10	13.1111	0.0708661	0	0	19	19	0.05	-0.503168	0	0	5	16.4804	0.0572068	0	0	25	36.0636	0.0269807	-1.08426	0	0	8	15.1768	0.0618167	0.111811
TGME49_214220	0	0	559	732.911	0.00136256	0	0	865	865	0.00115473	-0.238762	0	0	208	685.587	0.00145648	0	0	578	833.79	0.00119791	-0.281971	0	0	376	713.312	0.00139995	-0.0571125
TGME49_214230	0	0	3	3.93333	0.202703	0	0	4	4	0.2	-0.0193653	0	0	2	6.59218	0.131714	0	0	7	10.0978	0.090108	-0.547688	0	0	2	3.79421	0.208585	0.66322
TGME49_214240	0	0	7	9.17778	0.0982533	0	0	10	10	0.0909091	-0.112081	0	0	4	13.1844	0.0705002	0	0	5	7.21271	0.121762	0.78837	0	0	5	9.48553	0.0953695	0.435901
TGME49_214250	0	0	220	288.444	0.00345489	0	0	368	368	0.00271003	-0.350334	0	0	86	283.464	0.00351539	0	0	275	396.699	0.00251446	-0.483433	0	0	142	269.389	0.00369837	0.0732077
TGME49_214260	0	0	9	11.8	0.078125	0	0	5	5	0.166667	1.09311	0	0	3	9.88827	0.091842	0	0	3	4.32763	0.187701	1.03121	0	0	8	15.1768	0.0618167	-0.571156
TGME49_214270	0	0	33	43.2667	0.0225904	0	0	53	53	0.0185185	-0.286739	0	0	21	69.2179	0.0142414	0	0	52	75.0122	0.0131558	-0.114393	0	0	24	45.5305	0.0214913	0.59366
TGME49_214280	0	0	8	10.4889	0.0870406	0	0	8	8	0.111111	0.352242	0	0	2	6.59218	0.131714	1	1.44254	5	7.21271	0.29741	1.17504	0	0	7	13.2797	0.0700293	-0.911384
TGME49_214290	0	0	139	182.244	0.00545719	0	0	174	174	0.00571429	0.0664145	0	0	45	148.324	0.00669685	2	2.88509	144	207.726	0.0186133	1.47478	0	0	90	170.74	0.00582277	-0.201776
TGME49_214295	0	0	0	0	1	0	0	0	0	1	0	0	0	0	0	1	0	0	0	0	1	0	0	0	0	0	1	0
TGME49_214300	0	0	5	6.55556	0.132353	0	0	17	17	0.0555556	-1.25239	0	0	6	19.7765	0.0481312	1	1.44254	10	14.4254	0.158345	1.71803	0	0	5	9.48553	0.0953695	0.986555
TGME49_214310	0	0	11	14.4222	0.0648415	0	0	17	17	0.0555556	-0.222986	0	0	7	23.0726	0.041541	0	0	22	31.7359	0.0305475	-0.443482	0	0	8	15.1768	0.0618167	0.573463
TGME49_214320	0	0	75	98.3333	0.0100671	1	1	148	148	0.0134228	0.415037	0	0	32	105.475	0.00939189	1	1.44254	91	131.271	0.0184661	0.975396	0	0	51	96.7524	0.0102299	0.123309
TGME49_214330	0	0	4	5.24444	0.160142	0	0	1	1	0.5	1.64257	0	0	1	3.29609	0.23277	0	0	4	5.77017	0.147707	-0.656168	0	0	1	1.89711	0.345172	0.568411
TGME49_214340	0	0	9	11.8	0.078125	1	1	13	13	0.142857	0.870717	0	0	2	6.59218	0.131714	1	1.44254	15	21.6381	0.107895	-0.287786	0	0	8	15.1768	0.0618167	-1.09134
TGME49_214350	0	0	90	118	0.00840336	0	0	88	88	0.011236	0.419084	0	0	34	112.067	0.00884431	0	0	54	77.8973	0.0126747	0.51913	0	0	63	119.518	0.00829754	-0.0920664
TGME49_214360	0	0	0	0	1	0	0	3	3	0.25	-2	0	0	0	0	1	0	0	1	1.44254	0.409409	-1.28838	0	0	0	0	1	0
TGME49_214370	0	0	13	17.0444	0.0554187	0	0	4	4	0.2	1.85155	0	0	7	23.0726	0.041541	0	0	17	24.5232	0.03918	-0.0844173	0	0	9	17.074	0.0553282	0.413481
TGME49_214380	10	13.1111	20	26.2222	0.518367	22	22	50	50	0.45098	-0.20091	12	39.5531	12	39.5531	1	44	63.4719	34	49.0465	1.28824	0.365402	10	18.9711	13	24.6624	0.778223	-0.361744
TGME49_214385	10	13.1111	15	19.6667	0.682796	22	22	34	34	0.657143	-0.0552469	12	39.5531	7	23.0726	1.68461	44	63.4719	30	43.2763	1.45613	-0.210282	10	18.9711	11	20.8682	0.913248	-0.883339
TGME49_214390	10	13.1111	11	14.4222	0.914986	22	22	25	25	0.884615	-0.0486987	12	39.5531	2	6.59218	5.34143	44	63.4719	25	36.0636	1.73949	-1.61856	10	18.9711	9	17.074	1.10496	-2.27323
TGME49_214400	0	0	31	40.6444	0.0240128	3	3	19	19	0.2	3.05812	0	0	6	19.7765	0.0481312	4	5.77017	18	25.9658	0.251065	2.38302	0	0	16	30.3537	0.0318942	-0.59368
TGME49_214410	0	0	38	49.8222	0.0196764	4	4	94	94	0.0526316	1.41946	0	0	17	56.0335	0.0175335	7	10.0978	56	80.7824	0.135699	2.95222	0	0	26	49.3248	0.0198709	0.180542
TGME49_214420	0	0	0	0	1	2	2	3	3	0.75	-0.415037	0	0	0	0	1	5	7.21271	3	4.32763	1.54153	0.624366	0	0	0	0	1	0
TGME49_214430	0	0	4	5.24444	0.160142	2	2	21	21	0.136364	-0.231896	0	0	1	3.29609	0.23277	5	7.21271	16	23.0807	0.34105	0.551079	0	0	3	5.69132	0.149447	-0.639266
TGME49_214440	0	0	110	144.222	0.006886	0	0	172	172	0.00578035	-0.25251	0	0	61	201.061	0.00494899	0	0	79	113.961	0.00869861	0.813651	0	0	77	146.077	0.00679915	0.458221
TGME49_214450	0	0	0	0	1	0	0	3	3	0.25	-2	0	0	0	0	1	0	0	1	1.44254	0.409409	-1.28838	0	0	0	0	1	0
TGME49_214470	0	0	14	18.3556	0.0516648	0	0	15	15	0.0625	0.274676	0	0	5	16.4804	0.0572068	0	0	5	7.21271	0.121762	1.08981	0	0	10	18.9711	0.0500725	-0.192169
TGME49_214480	0	0	33	43.2667	0.0225904	0	0	31	31	0.03125	0.468149	0	0	6	19.7765	0.0481312	0	0	27	38.9487	0.0250321	-0.943192	0	0	23	43.6334	0.0224047	-1.10317
TGME49_214490	0	0	13	17.0444	0.0554187	0	0	14	14	0.0666667	0.266592	0	0	7	23.0726	0.041541	0	0	13	18.7531	0.0506251	0.285318	0	0	7	13.2797	0.0700293	0.753424
TGME49_214500	0	0	8	10.4889	0.0870406	0	0	8	8	0.111111	0.352242	0	0	2	6.59218	0.131714	0	0	7	10.0978	0.090108	-0.547688	0	0	4	7.58842	0.116436	-0.17788
TGME49_214510	0	0	0	0	1	0	0	1	1	0.5	-1	0	0	0	0	1	1	1.44254	1	1.44254	1	0	0	0	0	0	1	0
TGME49_214520	0	0	7	9.17778	0.0982533	0	0	12	12	0.0769231	-0.353089	0	0	3	9.88827	0.091842	1	1.44254	6	8.65526	0.252975	1.46177	0	0	3	5.69132	0.149447	0.702412
TGME49_214530	0	0	0	0	1	0	0	1	1	0.5	-1	0	0	1	3.29609	0.23277	0	0	0	0	1	2.10302	0	0	0	0	1	2.10302
TGME49_214540	0	0	22	28.8444	0.0335071	0	0	52	52	0.0188679	-0.82853	0	0	6	19.7765	0.0481312	0	0	28	40.3912	0.0241597	-0.994369	0	0	15	28.4566	0.0339483	-0.503635
TGME49_214545	0	0	0	0	1	0	0	0	0	1	0	0	0	0	0	1	0	0	0	0	1	0	0	0	0	0	1	0
TGME49_214550	0	0	0	0	1	0	0	0	0	1	0	0	0	0	0	1	0	0	0	0	1	0	0	0	0	0	1	0
TGME49_214560	0	0	26	34.0889	0.0284991	0	0	17	17	0.0555556	0.963017	0	0	11	36.257	0.0268406	0	0	14	20.1956	0.0471796	0.813746	0	0	17	32.2508	0.0300745	0.164122
TGME49_214570	0	0	0	0	1	0	0	0	0	1	0	0	0	0	0	1	0	0	0	0	1	0	0	0	0	0	1	0
TGME49_214575	0	0	93	121.933	0.00813449	0	0	175	175	0.00568182	-0.517699	0	0	18	59.3296	0.0165756	0	0	207	298.606	0.00333771	-2.31213	0	0	65	123.312	0.00804428	-1.04303
TGME49_214580	0	0	15	19.6667	0.0483871	0	0	15	15	0.0625	0.369234	0	0	12	39.5531	0.024659	0	0	14	20.1956	0.0471796	0.936046	0	0	11	20.8682	0.0457286	0.890979
TGME49_214590	0	0	11	14.4222	0.0648415	0	0	13	13	0.0714286	0.139584	0	0	8	26.3687	0.0365381	0	0	11	15.868	0.059284	0.698241	0	0	7	13.2797	0.0700293	0.938558
TGME49_214600	0	0	6	7.86667	0.112782	0	0	10	10	0.0909091	-0.31104	0	0	4	13.1844	0.0705002	0	0	7	10.0978	0.090108	0.354027	0	0	3	5.69132	0.149447	1.08394
TGME49_214610	0	0	2	2.62222	0.276074	0	0	3	3	0.25	-0.143125	0	0	3	9.88827	0.091842	0	0	4	5.77017	0.147707	0.68551	0	0	1	1.89711	0.345172	1.91009
TGME49_214620	0	0	9	11.8	0.078125	0	0	10	10	0.0909091	0.21864	0	0	7	23.0726	0.041541	0	0	7	10.0978	0.090108	1.11712	0	0	6	11.3826	0.0807582	0.959075
TGME49_214630	0	0	6	7.86667	0.112782	0	0	3	3	0.25	1.14839	0	0	1	3.29609	0.23277	0	0	4	5.77017	0.147707	-0.656168	0	0	6	11.3826	0.0807582	-1.52722
TGME49_214740	0	0	3	3.93333	0.202703	0	0	1	1	0.5	1.30256	0	0	3	9.88827	0.091842	0	0	0	0	1	3.4447	0	0	2	3.79421	0.208585	1.18341
TGME49_214750	0	0	27	35.4	0.0274725	0	0	28	28	0.0344828	0.327886	0	0	10	32.9609	0.0294456	0	0	26	37.5061	0.0259699	-0.181213	0	0	20	37.9421	0.0256791	-0.197457
TGME49_214760	0	0	6	7.86667	0.112782	0	0	8	8	0.111111	-0.0215332	0	0	5	16.4804	0.0572068	0	0	10	14.4254	0.064828	0.180432	0	0	4	7.58842	0.116436	1.02528
TGME49_214770	0	0	67	87.8444	0.0112556	0	0	71	71	0.0138889	0.303285	0	0	20	65.9218	0.0149428	0	0	68	98.0929	0.0100915	-0.566306	0	0	44	83.4727	0.0118381	-0.336009
TGME49_214780	0	0	11	14.4222	0.0648415	0	0	11	11	0.0833333	0.361976	0	0	4	13.1844	0.0705002	0	0	16	23.0807	0.0415271	-0.763576	0	0	7	13.2797	0.0700293	-0.00966918
TGME49_214783	0	0	0	0	1	0	0	0	0	1	0	0	0	0	0	1	0	0	0	0	1	0	0	0	0	0	1	0
TGME49_214787	0	0	0	0	1	0	0	0	0	1	0	0	0	0	0	1	0	0	0	0	1	0	0	0	0	0	1	0
TGME49_214790	0	0	112	146.844	0.00676387	0	0	153	153	0.00649351	-0.0588503	0	0	32	105.475	0.00939189	0	0	138	199.071	0.00499823	-0.909999	0	0	78	147.974	0.00671257	-0.48455
TGME49_214800	0	0	3	3.93333	0.202703	0	0	4	4	0.2	-0.0193653	0	0	3	9.88827	0.091842	0	0	6	8.65526	0.103571	0.173388	0	0	2	3.79421	0.208585	1.18341
TGME49_214810	0	0	13	17.0444	0.0554187	0	0	10	10	0.0909091	0.714051	0	0	5	16.4804	0.0572068	0	0	7	10.0978	0.090108	0.655468	0	0	9	17.074	0.0553282	-0.0481702
TGME49_214820	0	0	10	13.1111	0.0708661	0	0	25	25	0.0384615	-0.88168	0	0	5	16.4804	0.0572068	0	0	13	18.7531	0.0506251	-0.176334	0	0	3	5.69132	0.149447	1.38538
TGME49_214830	0	0	16	20.9778	0.0455005	0	0	17	17	0.0555556	0.288049	0	0	4	13.1844	0.0705002	0	0	12	17.3105	0.0546134	-0.368371	0	0	10	18.9711	0.0500725	-0.49361
TGME49_214835	0	0	5	6.55556	0.132353	0	0	12	12	0.0769231	-0.782902	0	0	2	6.59218	0.131714	0	0	6	8.65526	0.103571	-0.346801	0	0	2	3.79421	0.208585	0.66322
TGME49_214840	0	0	131	171.756	0.00578853	0	0	138	138	0.00719424	0.313647	0	0	50	164.804	0.0060312	0	0	68	98.0929	0.0100915	0.742629	0	0	85	161.254	0.00616318	0.0312287
TGME49_214850	0	0	4	5.24444	0.160142	0	0	4	4	0.2	0.320645	0	0	4	13.1844	0.0705002	0	0	1	1.44254	0.409409	2.53785	0	0	3	5.69132	0.149447	1.08394
TGME49_214860	0	0	0	0	1	0	0	0	0	1	0	0	0	0	0	1	0	0	0	0	1	0	0	0	0	0	1	0
TGME49_214870	0	0	3	3.93333	0.202703	0	0	9	9	0.1	-1.01937	0	0	1	3.29609	0.23277	0	0	2	2.88509	0.257395	0.145078	0	0	3	5.69132	0.149447	-0.639266
TGME49_214880	0	0	67	87.8444	0.0112556	0	0	90	90	0.010989	-0.034585	0	0	34	112.067	0.00884431	0	0	48	69.2421	0.0142365	0.686771	0	0	50	94.8553	0.0104324	0.238248
TGME49_214900	0	0	17	22.2889	0.0429389	0	0	12	12	0.0769231	0.84113	0	0	4	13.1844	0.0705002	0	0	8	11.5403	0.0797426	0.177724	0	0	14	26.5595	0.0362851	-0.958248
TGME49_214910	0	0	5	6.55556	0.132353	0	0	3	3	0.25	0.917538	0	0	1	3.29609	0.23277	0	0	2	2.88509	0.257395	0.145078	0	0	3	5.69132	0.149447	-0.639266
TGME49_214920	0	0	10	13.1111	0.0708661	0	0	22	22	0.0434783	-0.704802	0	0	5	16.4804	0.0572068	0	0	11	15.868	0.059284	0.0514557	0	0	9	17.074	0.0553282	-0.0481702
TGME49_214930	0	0	28	36.7111	0.0265174	0	0	42	42	0.0232558	-0.189347	0	0	5	16.4804	0.0572068	0	0	37	53.3741	0.0183911	-1.63718	0	0	17	32.2508	0.0300745	-0.927647
TGME49_214940	0	0	780	1022.67	0.00097688	1	1	1161	1161	0.00172117	0.817136	0	0	328	1081.12	0.000924114	1	1.44254	629	907.359	0.00268896	1.54091	0	0	525	995.981	0.00100303	0.118219
TGME49_214950	0	0	134	175.689	0.00565967	1	1	255	255	0.0078125	0.465068	0	0	38	125.251	0.0079207	1	1.44254	191	275.526	0.00883297	0.15727	0	0	90	170.74	0.00582277	-0.443923
TGME49_214960	0	0	10	13.1111	0.0708661	0	0	10	10	0.0909091	0.359328	0	0	2	6.59218	0.131714	0	0	5	7.21271	0.121762	-0.113345	0	0	9	17.074	0.0553282	-1.25133
TGME49_214970	0	0	75	98.3333	0.0100671	0	0	81	81	0.0121951	0.276654	0	0	27	88.9944	0.0111118	0	0	59	85.11	0.011613	0.0636542	0	0	45	85.3698	0.0115781	0.0593089
TGME49_214980	0	0	16	20.9778	0.0455005	0	0	38	38	0.025641	-0.827429	0	0	6	19.7765	0.0481312	0	0	20	28.8509	0.0334999	-0.522817	0	0	12	22.7653	0.0420782	-0.1939
TGME49_214990	0	0	8	10.4889	0.0870406	0	0	2	2	0.333333	1.9372	0	0	1	3.29609	0.23277	0	0	7	10.0978	0.090108	-1.36918	0	0	4	7.58842	0.116436	-0.999369
TGME49_215010	0	0	17	22.2889	0.0429389	0	0	12	12	0.0769231	0.84113	0	0	0	0	1	0	0	11	15.868	0.059284	-4.07621	0	0	11	20.8682	0.0457286	-4.45076
TGME49_215020	0	0	7	9.17778	0.0982533	0	0	8	8	0.111111	0.177426	0	0	3	9.88827	0.091842	0	0	3	4.32763	0.187701	1.03121	0	0	4	7.58842	0.116436	0.342309
TGME49_215030	0	0	10	13.1111	0.0708661	0	0	12	12	0.0769231	0.11832	0	0	2	6.59218	0.131714	0	0	4	5.77017	0.147707	0.165322	0	0	7	13.2797	0.0700293	-0.911384
TGME49_215040	1	1.31111	19	24.9111	0.0891938	2	2	10	10	0.272727	1.61244	1	3.29609	3	9.88827	0.394561	4	5.77017	20	28.8509	0.2268	-0.798829	1	1.89711	10	18.9711	0.145065	-1.44355
TGME49_215050	1	1.31111	1	1.31111	1	2	2	2	2	1	0	1	3.29609	0	0	4.29609	4	5.77017	3	4.32763	1.27077	-1.75733	1	1.89711	1	1.89711	1	-2.10302
TGME49_215055	0	0	0	0	1	0	0	0	0	1	0	0	0	0	0	1	0	0	0	0	1	0	0	0	0	0	1	0
TGME49_215060	0	0	54	70.8	0.0139276	0	0	75	75	0.0131579	-0.0820156	0	0	31	102.179	0.00969192	0	0	52	75.0122	0.0131558	0.440843	0	0	32	60.7074	0.0162055	0.741631
TGME49_215070	0	0	26	34.0889	0.0284991	0	0	41	41	0.0238095	-0.259375	0	0	13	42.8492	0.0228055	0	0	22	31.7359	0.0305475	0.421674	0	0	17	32.2508	0.0300745	0.39916
TGME49_215080	0	0	10	13.1111	0.0708661	0	0	8	8	0.111111	0.648835	0	0	3	9.88827	0.091842	0	0	2	2.88509	0.257395	1.48676	0	0	9	17.074	0.0553282	-0.731138
TGME49_215090	0	0	14	18.3556	0.0516648	0	0	26	26	0.037037	-0.480212	0	0	4	13.1844	0.0705002	0	0	15	21.6381	0.0441732	-0.674455	0	0	11	20.8682	0.0457286	-0.624532
TGME49_215100	0	0	2	2.62222	0.276074	0	0	2	2	0.333333	0.271913	0	0	0	0	1	0	0	2	2.88509	0.257395	-1.95795	0	0	0	0	1	0
TGME49_215110	0	0	0	0	1	0	0	0	0	1	0	0	0	0	0	1	0	0	0	0	1	0	0	0	0	0	1	0
TGME49_215120	0	0	0	0	1	0	0	0	0	1	0	0	0	0	0	1	0	0	0	0	1	0	0	0	0	0	1	0
TGME49_215130	0	0	22	28.8444	0.0335071	1	1	25	25	0.0769231	1.19895	0	0	11	36.257	0.0268406	1	1.44254	16	23.0807	0.101432	1.91802	0	0	14	26.5595	0.0362851	0.434962
TGME49_215140	0	0	0	0	1	1	1	5	5	0.333333	-1.58496	0	0	0	0	1	1	1.44254	3	4.32763	0.458467	-1.12511	0	0	0	0	1	0
TGME49_215150	0	0	69	90.4667	0.0109329	0	0	91	91	0.0108696	-0.00838779	0	0	33	108.771	0.00910988	0	0	68	98.0929	0.0100915	0.147643	0	0	51	96.7524	0.0102299	0.167292
TGME49_215160	0	0	73	95.7111	0.0103401	0	0	124	124	0.008	-0.370175	0	0	27	88.9944	0.0111118	0	0	85	122.616	0.00808956	-0.45796	0	0	53	100.547	0.00984769	-0.174235
TGME49_215165	0	0	0	0	1	0	0	0	0	1	0	0	0	0	0	1	0	0	0	0	1	0	0	0	0	0	1	0
TGME49_215170	0	0	37	48.5111	0.0201975	0	0	42	42	0.0232558	0.203416	0	0	20	65.9218	0.0149428	0	0	26	37.5061	0.0259699	0.797389	0	0	22	41.7363	0.0233993	0.647013
TGME49_215180	0	0	1	1.31111	0.432692	0	0	9	9	0.1	-2.11334	0	0	3	9.88827	0.091842	1	1.44254	5	7.21271	0.29741	1.69523	0	0	0	0	1	3.4447
TGME49_215185	0	0	0	0	1	0	0	0	0	1	0	0	0	0	0	1	1	1.44254	1	1.44254	1	0	0	0	0	0	1	0
TGME49_215195	0	0	1	1.31111	0.432692	0	0	7	7	0.125	-1.79141	0	0	0	0	1	1	1.44254	6	8.65526	0.252975	-1.98293	0	0	0	0	1	0
TGME49_215210	0	0	27	35.4	0.0274725	0	0	31	31	0.03125	0.185867	0	0	11	36.257	0.0268406	0	0	17	24.5232	0.03918	0.5457	0	0	20	37.9421	0.0256791	-0.0638206
TGME49_215220	0	0	167	218.956	0.00454637	0	0	264	264	0.00377358	-0.26878	0	0	56	184.581	0.00538848	0	0	171	246.675	0.00403755	-0.416398	0	0	123	233.344	0.00426723	-0.336579
TGME49_215230	0	0	11	14.4222	0.0648415	0	0	6	6	0.142857	1.13958	0	0	6	19.7765	0.0481312	0	0	9	12.9829	0.071516	0.571293	0	0	9	17.074	0.0553282	0.201043
TGME49_215250	0	0	5	6.55556	0.132353	0	0	13	13	0.0714286	-0.889817	0	0	7	23.0726	0.041541	0	0	12	17.3105	0.0546134	0.394721	0	0	3	5.69132	0.149447	1.84703
TGME49_215260	0	0	17	22.2889	0.0429389	0	0	17	17	0.0555556	0.371645	0	0	5	16.4804	0.0572068	0	0	16	23.0807	0.0415271	-0.462134	0	0	13	24.6624	0.0389675	-0.553913
TGME49_215270	0	0	0	0	1	0	0	0	0	1	0	0	0	0	0	1	0	0	0	0	1	0	0	0	0	0	1	0
TGME49_215280	0	0	21	27.5333	0.0350467	0	0	64	64	0.0153846	-1.18779	0	0	15	49.4413	0.019825	0	0	52	75.0122	0.0131558	-0.591625	0	0	13	24.6624	0.0389675	0.974952
TGME49_215290	0	0	11	14.4222	0.0648415	0	0	18	18	0.0526316	-0.300989	0	0	6	19.7765	0.0481312	0	0	13	18.7531	0.0506251	0.0728793	0	0	8	15.1768	0.0618167	0.361025
TGME49_215300	0	0	9	11.8	0.078125	0	0	4	4	0.2	1.35614	0	0	2	6.59218	0.131714	0	0	12	17.3105	0.0546134	-1.27009	0	0	7	13.2797	0.0700293	-0.911384
TGME49_215320	0	0	0	0	1	0	0	0	0	1	0	0	0	0	0	1	0	0	0	0	1	0	0	0	0	0	1	0
TGME49_215328	0	0	0	0	1	0	0	0	0	1	0	0	0	0	0	1	0	0	0	0	1	0	0	0	0	0	1	0
TGME49_215340	0	0	1	1.31111	0.432692	0	0	0	0	1	1.20859	0	0	0	0	1	0	0	2	2.88509	0.257395	-1.95795	0	0	1	1.89711	0.345172	-1.53461
TGME49_215343	0	0	0	0	1	0	0	0	0	1	0	0	0	0	0	1	0	0	0	0	1	0	0	0	0	0	1	0
TGME49_215347	1	1.31111	23	30.1556	0.0741797	4	4	49	49	0.1	0.430903	3	9.88827	10	32.9609	0.320612	12	17.3105	41	59.1443	0.304443	-0.0746547	1	1.89711	16	30.3537	0.0924008	-1.79485
TGME49_215350	1	1.31111	100	131.111	0.0174937	4	4	95	95	0.0520833	1.57399	3	9.88827	47	154.916	0.0698341	12	17.3105	74	106.748	0.169938	1.28301	1	1.89711	72	136.592	0.0210558	-1.72971
TGME49_215360	0	0	28	36.7111	0.0265174	0	0	69	69	0.0142857	-0.892365	0	0	13	42.8492	0.0228055	0	0	41	59.1443	0.0166267	-0.455878	0	0	20	37.9421	0.0256791	0.171218
TGME49_215370	0	0	10	13.1111	0.0708661	0	0	9	9	0.1	0.496832	0	0	5	16.4804	0.0572068	0	0	10	14.4254	0.064828	0.180432	0	0	7	13.2797	0.0700293	0.291772
TGME49_215380	0	0	8	10.4889	0.0870406	0	0	7	7	0.125	0.522167	0	0	6	19.7765	0.0481312	0	0	4	5.77017	0.147707	1.61769	0	0	6	11.3826	0.0807582	0.746637
TGME49_215385	0	0	0	0	1	0	0	0	0	1	0	0	0	0	0	1	0	0	0	0	1	0	0	0	0	0	1	0
TGME49_215390	0	0	35	45.8889	0.021327	0	0	48	48	0.0204082	-0.0635357	0	0	6	19.7765	0.0481312	0	0	48	69.2421	0.0142365	-1.75738	0	0	24	45.5305	0.0214913	-1.16322
TGME49_215400	0	0	17	22.2889	0.0429389	0	0	36	36	0.027027	-0.667883	0	0	6	19.7765	0.0481312	0	0	32	46.1614	0.0212038	-1.18265	0	0	12	22.7653	0.0420782	-0.1939
TGME49_215410	0	0	0	0	1	0	0	0	0	1	0	0	0	0	0	1	0	0	0	0	1	0	0	0	0	0	1	0
TGME49_215420	21	27.5333	36	47.2	0.591978	19	19	28	28	0.689655	0.220332	26	85.6983	13	42.8492	1.97719	48	69.2421	37	53.3741	1.29183	-0.614039	21	39.8392	26	49.3248	0.811514	-1.28477
TGME49_215425	59	77.3556	104	136.356	0.570458	80	80	116	116	0.692308	0.279293	80	263.687	47	154.916	1.69762	162	233.692	108	155.795	1.49681	-0.181625	59	111.929	72	136.592	0.820757	-1.04849
TGME49_215430	38	49.8222	47	61.6222	0.811568	62	62	69	69	0.9	0.149212	54	177.989	18	59.3296	2.96685	118	170.22	59	85.11	1.98839	-0.577333	38	72.09	36	68.2958	1.05475	-1.49203
TGME49_215440	0	0	19	24.9111	0.0385935	0	0	27	27	0.0357143	-0.111856	0	0	4	13.1844	0.0705002	0	0	10	14.4254	0.064828	-0.12101	0	0	13	24.6624	0.0389675	-0.855354
TGME49_215450	0	0	13	17.0444	0.0554187	0	0	23	23	0.0416667	-0.41148	0	0	5	16.4804	0.0572068	0	0	7	10.0978	0.090108	0.655468	0	0	7	13.2797	0.0700293	0.291772
TGME49_215460	0	0	1433	1878.82	0.000531965	0	0	2298	2298	0.000434972	-0.29041	0	0	533	1756.82	0.000568888	1	1.44254	1634	2357.11	0.0010358	0.864534	0	0	953	1807.94	0.000552809	-0.0413625
TGME49_215470	0	0	1255	1645.44	0.000607369	0	0	1505	1505	0.000664011	0.128632	0	0	397	1308.55	0.000763623	0	0	1201	1732.49	0.00057687	-0.404614	0	0	853	1618.23	0.000617577	-0.306241
TGME49_215480	0	0	14	18.3556	0.0516648	0	0	27	27	0.0357143	-0.532679	0	0	11	36.257	0.0268406	1	1.44254	18	25.9658	0.0905794	1.75477	0	0	12	22.7653	0.0420782	0.648656
TGME49_215490	0	0	215	281.889	0.00353496	0	0	279	279	0.00357143	0.0148087	0	0	95	313.128	0.00318341	3	4.32763	196	282.738	0.0187766	2.56029	0	0	141	267.492	0.00372451	0.226476
TGME49_215500	0	0	7	9.17778	0.0982533	0	0	5	5	0.166667	0.762388	0	0	1	3.29609	0.23277	3	4.32763	10	14.4254	0.34538	0.569279	0	0	4	7.58842	0.116436	-0.999369
TGME49_215510	0	0	42	55.0667	0.0178359	2	2	44	44	0.0666667	1.90218	0	0	10	32.9609	0.0294456	2	2.88509	12	17.3105	0.212178	2.84915	0	0	30	56.9132	0.0172672	-0.770017
TGME49_215520	0	0	32	41.9556	0.0232799	2	2	34	34	0.0857143	1.88045	0	0	12	39.5531	0.024659	2	2.88509	20	28.8509	0.13015	2.39999	0	0	24	45.5305	0.0214913	-0.198367
TGME49_215530	0	0	811	1063.31	0.000939575	0	0	584	584	0.0017094	0.863411	0	0	315	1038.27	0.000962216	0	0	383	552.494	0.0018067	0.908929	0	0	552	1047.2	0.000954014	-0.0123496
TGME49_215540	0	0	6	7.86667	0.112782	0	0	6	6	0.142857	0.341037	0	0	0	0	1	0	0	0	0	1	0	0	0	6	11.3826	0.0807582	-3.63025
TGME49_215550	0	0	9	11.8	0.078125	0	0	13	13	0.0714286	-0.129283	0	0	1	3.29609	0.23277	0	0	4	5.77017	0.147707	-0.656168	0	0	8	15.1768	0.0618167	-1.91283
TGME49_215560	0	0	1	1.31111	0.432692	0	0	3	3	0.25	-0.791413	0	0	1	3.29609	0.23277	0	0	3	4.32763	0.187701	-0.310469	0	0	0	0	1	2.10302
TGME49_215570	0	0	8	10.4889	0.0870406	1	1	9	9	0.2	1.20024	0	0	3	9.88827	0.091842	2	2.88509	5	7.21271	0.473057	2.36479	0	0	5	9.48553	0.0953695	0.0543746
TGME49_215580	0	0	0	0	1	1	1	1	1	1	0	0	0	0	0	1	2	2.88509	1	1.44254	1.59059	0.669563	0	0	0	0	1	0
TGME49_215590	0	0	68	89.1556	0.0110919	0	0	94	94	0.0105263	-0.0755111	0	0	26	85.6983	0.0115342	0	0	53	76.4548	0.0129108	0.16265	0	0	44	83.4727	0.0118381	0.0375195
TGME49_215600	0	0	3	3.93333	0.202703	0	0	5	5	0.166667	-0.2824	0	0	1	3.29609	0.23277	0	0	3	4.32763	0.187701	-0.310469	0	0	3	5.69132	0.149447	-0.639266
TGME49_215610	0	0	86	112.756	0.00879078	0	0	156	156	0.00636943	-0.464828	0	0	17	56.0335	0.0175335	0	0	101	145.697	0.00681678	-1.36296	0	0	58	110.032	0.0090064	-0.961096
TGME49_215620	0	0	3	3.93333	0.202703	0	0	3	3	0.25	0.302563	0	0	4	13.1844	0.0705002	0	0	1	1.44254	0.409409	2.53785	0	0	3	5.69132	0.149447	1.08394
TGME49_215640	0	0	18	23.6	0.0406504	0	0	15	15	0.0625	0.620586	0	0	10	32.9609	0.0294456	0	0	10	14.4254	0.064828	1.13856	0	0	11	20.8682	0.0457286	0.635042
TGME49_215650	0	0	0	0	1	0	0	0	0	1	0	0	0	0	0	1	0	0	0	0	1	0	0	0	0	0	1	0
TGME49_215660	0	0	5	6.55556	0.132353	0	0	15	15	0.0625	-1.08246	0	0	3	9.88827	0.091842	0	0	8	11.5403	0.0797426	-0.203802	0	0	3	5.69132	0.149447	0.702412
TGME49_215670	0	0	0	0	1	0	0	0	0	1	0	0	0	0	0	1	0	0	0	0	1	0	0	0	0	0	1	0
TGME49_215680	0	0	24	31.4667	0.0308008	0	0	23	23	0.0416667	0.435925	0	0	6	19.7765	0.0481312	0	0	19	27.4083	0.035201	-0.451358	0	0	15	28.4566	0.0339483	-0.503635
TGME49_215690	0	0	5	6.55556	0.132353	0	0	5	5	0.166667	0.332575	0	0	3	9.88827	0.091842	0	0	4	5.77017	0.147707	0.68551	0	0	3	5.69132	0.149447	0.702412
TGME49_215700	0	0	9	11.8	0.078125	0	0	3	3	0.25	1.67807	0	0	2	6.59218	0.131714	0	0	2	2.88509	0.257395	0.966568	0	0	8	15.1768	0.0618167	-1.09134
TGME49_215710	0	0	7	9.17778	0.0982533	0	0	6	6	0.142857	0.539996	0	0	1	3.29609	0.23277	0	0	11	15.868	0.059284	-1.97319	0	0	5	9.48553	0.0953695	-1.2873
TGME49_215730	0	0	5	6.55556	0.132353	0	0	3	3	0.25	0.917538	0	0	0	0	1	0	0	2	2.88509	0.257395	-1.95795	0	0	4	7.58842	0.116436	-3.10239
TGME49_215740	0	0	10	13.1111	0.0708661	0	0	11	11	0.0833333	0.233797	0	0	7	23.0726	0.041541	0	0	8	11.5403	0.0797426	0.940817	0	0	6	11.3826	0.0807582	0.959075
TGME49_215750	0	0	6	7.86667	0.112782	0	0	6	6	0.142857	0.341037	0	0	0	0	1	0	0	3	4.32763	0.187701	-2.41349	0	0	4	7.58842	0.116436	-3.10239
TGME49_215775	0	0	69	90.4667	0.0109329	0	0	69	69	0.0142857	0.385891	0	0	44	145.028	0.006848	0	0	44	63.4719	0.0155106	1.1795	0	0	46	87.2669	0.0113293	0.7263
TGME49_215785	0	0	0	0	1	0	0	0	0	1	0	0	0	0	0	1	0	0	0	0	1	0	0	0	0	0	1	0
TGME49_215885	0	0	0	0	1	1	1	2	2	0.666667	-0.584963	0	0	2	6.59218	0.131714	3	4.32763	5	7.21271	0.648705	2.30015	0	0	0	0	1	2.92451
TGME49_215890	0	0	9	11.8	0.078125	1	1	5	5	0.333333	2.09311	0	0	5	16.4804	0.0572068	3	4.32763	11	15.868	0.315843	2.46495	0	0	6	11.3826	0.0807582	0.497424
TGME49_215895	0	0	21	27.5333	0.0350467	0	0	60	60	0.0163934	-1.09616	0	0	14	46.1453	0.021211	0	0	24	34.621	0.0280733	0.404383	0	0	16	30.3537	0.0318942	0.588477
TGME49_215900	0	0	0	0	1	0	0	0	0	1	0	0	0	0	0	1	0	0	0	0	1	0	0	0	0	0	1	0
TGME49_215910	0	0	33	43.2667	0.0225904	0	0	47	47	0.0208333	-0.116814	0	0	15	49.4413	0.019825	0	0	17	24.5232	0.03918	0.982796	0	0	21	39.8392	0.0244863	0.304651
TGME49_215920	0	0	4	5.24444	0.160142	0	0	6	6	0.142857	-0.164782	0	0	2	6.59218	0.131714	0	0	0	0	1	2.92451	0	0	4	7.58842	0.116436	-0.17788
TGME49_215930	0	0	0	0	1	0	0	5	5	0.166667	-2.58496	0	0	2	6.59218	0.131714	0	0	2	2.88509	0.257395	0.966568	0	0	0	0	1	2.92451
TGME49_215940	0	0	15	19.6667	0.0483871	0	0	14	14	0.0666667	0.462343	0	0	8	26.3687	0.0365381	0	0	6	8.65526	0.103571	1.50314	0	0	10	18.9711	0.0500725	0.454617
TGME49_215950	0	0	19	24.9111	0.0385935	0	0	15	15	0.0625	0.695499	0	0	5	16.4804	0.0572068	0	0	7	10.0978	0.090108	0.655468	0	0	14	26.5595	0.0362851	-0.656807
TGME49_215955	0	0	2	2.62222	0.276074	1	1	5	5	0.333333	0.271913	0	0	0	0	1	2	2.88509	1	1.44254	1.59059	0.669563	0	0	1	1.89711	0.345172	-1.53461
TGME49_215960	0	0	1	1.31111	0.432692	0	0	1	1	0.5	0.208587	0	0	0	0	1	0	0	3	4.32763	0.187701	-2.41349	0	0	1	1.89711	0.345172	-1.53461
TGME49_215970	52	68.1778	1382	1811.96	0.0381575	235	235	1628	1628	0.144874	1.92476	67	220.838	460	1516.2	0.146215	409	590	1026	1480.05	0.399042	1.44844	52	98.6495	964	1828.81	0.0544589	-1.42485
TGME49_215980	52	68.1778	1585	2078.11	0.0332728	235	235	2038	2038	0.115743	1.79851	67	220.838	432	1423.91	0.155686	410	591.443	1133	1634.4	0.362261	1.2184	52	98.6495	1099	2084.92	0.0477725	-1.70438
TGME49_215990	0	0	4	5.24444	0.160142	0	0	17	17	0.0555556	-1.52735	0	0	1	3.29609	0.23277	0	0	7	10.0978	0.090108	-1.36918	0	0	3	5.69132	0.149447	-0.639266
TGME49_216000	0	0	448	587.378	0.00169959	0	0	529	529	0.00188679	0.15075	0	0	141	464.749	0.00214708	0	0	324	467.384	0.002135	-0.00813993	0	0	316	599.486	0.00166532	-0.366578
TGME49_216010	0	0	8	10.4889	0.0870406	0	0	20	20	0.047619	-0.87015	0	0	9	29.6648	0.0326107	0	0	13	18.7531	0.0506251	0.634508	0	0	8	15.1768	0.0618167	0.922653
TGME49_216020	0	0	11	14.4222	0.0648415	0	0	19	19	0.05	-0.374989	0	0	3	9.88827	0.091842	0	0	11	15.868	0.059284	-0.631512	0	0	9	17.074	0.0553282	-0.731138
TGME49_216030	0	0	3	3.93333	0.202703	0	0	7	7	0.125	-0.697437	0	0	3	9.88827	0.091842	0	0	2	2.88509	0.257395	1.48676	0	0	2	3.79421	0.208585	1.18341
TGME49_216040	0	0	13	17.0444	0.0554187	0	0	13	13	0.0714286	0.366128	0	0	4	13.1844	0.0705002	0	0	13	18.7531	0.0506251	-0.477775	0	0	7	13.2797	0.0700293	-0.00966918
TGME49_216050	0	0	15	19.6667	0.0483871	1	1	22	22	0.0869565	0.845672	0	0	4	13.1844	0.0705002	6	8.65526	13	18.7531	0.488798	2.79354	0	0	11	20.8682	0.0457286	-0.624532
TGME49_216053	0	0	2	2.62222	0.276074	1	1	1	1	1	1.85688	0	0	0	0	1	6	8.65526	6	8.65526	1	0	0	0	2	3.79421	0.208585	-2.26129
TGME49_216055	0	0	24	31.4667	0.0308008	1	1	27	27	0.0714286	1.21353	0	0	11	36.257	0.0268406	1	1.44254	25	36.0636	0.0659014	1.29589	0	0	17	32.2508	0.0300745	0.164122
TGME49_216060	0	0	23	30.1556	0.032097	1	1	19	19	0.1	1.63949	0	0	5	16.4804	0.0572068	1	1.44254	14	20.1956	0.115238	1.01036	0	0	12	22.7653	0.0420782	-0.443113
TGME49_216070	0	0	6	7.86667	0.112782	0	0	13	13	0.0714286	-0.658963	0	0	1	3.29609	0.23277	0	0	3	4.32763	0.187701	-0.310469	0	0	4	7.58842	0.116436	-0.999369
TGME49_216080	0	0	89	116.689	0.00849698	0	0	88	88	0.011236	0.403101	0	0	37	121.955	0.00813304	0	0	79	113.961	0.00869861	0.096991	0	0	51	96.7524	0.0102299	0.33093
TGME49_216090	0	0	0	0	1	0	0	0	0	1	0	0	0	0	0	1	0	0	1	1.44254	0.409409	-1.28838	0	0	0	0	1	0
TGME49_216120	0	0	18	23.6	0.0406504	0	0	39	39	0.025	-0.701342	0	0	7	23.0726	0.041541	0	0	28	40.3912	0.0241597	-0.78193	0	0	13	24.6624	0.0389675	-0.0922614
TGME49_216130	0	0	83	108.822	0.00910563	0	0	98	98	0.010101	0.14967	0	0	36	118.659	0.00835707	0	0	89	128.386	0.00772879	-0.112753	0	0	62	117.621	0.00843024	0.0125772
TGME49_216140	0	0	20	26.2222	0.0367347	0	0	29	29	0.0333333	-0.140178	0	0	0	0	1	0	0	7	10.0978	0.090108	-3.4722	0	0	17	32.2508	0.0300745	-5.05532
TGME49_216150	0	0	0	0	1	0	0	0	0	1	0	0	0	0	0	1	0	0	0	0	1	0	0	0	0	0	1	0
TGME49_216155	0	0	0	0	1	0	0	0	0	1	0	0	0	0	0	1	0	0	0	0	1	0	0	0	0	0	1	0
TGME49_216160	0	0	0	0	1	0	0	1	1	0.5	-1	0	0	0	0	1	0	0	0	0	1	0	0	0	0	0	1	0
TGME49_216170	0	0	8	10.4889	0.0870406	0	0	13	13	0.0714286	-0.285188	0	0	5	16.4804	0.0572068	0	0	2	2.88509	0.257395	2.16972	0	0	6	11.3826	0.0807582	0.497424
TGME49_216180	0	0	411	538.867	0.00185231	0	0	469	469	0.00212766	0.199942	0	0	159	524.078	0.00190448	0	0	329	474.597	0.00210262	0.142794	0	0	266	504.63	0.00197773	0.0544496
TGME49_216190	0	0	0	0	1	0	0	5	5	0.166667	-2.58496	0	0	0	0	1	0	0	1	1.44254	0.409409	-1.28838	0	0	0	0	1	0
TGME49_216200	0	0	0	0	1	0	0	0	0	1	0	0	0	0	0	1	0	0	0	0	1	0	0	0	0	0	1	0
TGME49_216210	0	0	11	14.4222	0.0648415	0	0	8	8	0.111111	0.777014	0	0	2	6.59218	0.131714	0	0	9	12.9829	0.071516	-0.881076	0	0	4	7.58842	0.116436	-0.17788
TGME49_216220	6	7.86667	11	14.4222	0.574928	4	4	10	10	0.454545	-0.338957	6	19.7765	0	0	20.7765	8	11.5403	5	7.21271	1.52694	-3.76624	6	11.3826	7	13.2797	0.867147	-4.58253
TGME49_216230	6	7.86667	30	39.3333	0.219835	4	4	30	30	0.16129	-0.446759	6	19.7765	10	32.9609	0.611778	8	11.5403	20	28.8509	0.4201	-0.542276	6	11.3826	23	43.6334	0.27743	-1.14089
TGME49_216240	0	0	11	14.4222	0.0648415	0	0	12	12	0.0769231	0.246499	0	0	4	13.1844	0.0705002	0	0	8	11.5403	0.0797426	0.177724	0	0	9	17.074	0.0553282	-0.349611
TGME49_216250	0	0	5	6.55556	0.132353	0	0	8	8	0.111111	-0.252387	0	0	1	3.29609	0.23277	0	0	5	7.21271	0.121762	-0.934835	0	0	4	7.58842	0.116436	-0.999369
TGME49_216260	0	0	17	22.2889	0.0429389	2	2	20	20	0.142857	1.73421	0	0	7	23.0726	0.041541	2	2.88509	17	24.5232	0.152218	1.87353	0	0	13	24.6624	0.0389675	-0.0922614
TGME49_216270	0	0	4	5.24444	0.160142	5	5	14	14	0.4	1.32065	1	3.29609	5	16.4804	0.245765	7	10.0978	7	10.0978	1	2.02465	0	0	1	1.89711	0.345172	0.490034
TGME49_216275	0	0	1	1.31111	0.432692	5	5	5	5	1	1.20859	1	3.29609	1	3.29609	1	7	10.0978	2	2.88509	2.85651	1.51426	0	0	1	1.89711	0.345172	-1.53461
TGME49_216280	0	0	0	0	1	0	0	0	0	1	0	0	0	0	0	1	0	0	0	0	1	0	0	0	0	0	1	0
TGME49_216285	0	0	0	0	1	0	0	1	1	0.5	-1	0	0	0	0	1	0	0	1	1.44254	0.409409	-1.28838	0	0	0	0	1	0
TGME49_216290	0	0	0	0	1	0	0	0	0	1	0	0	0	0	0	1	0	0	0	0	1	0	0	0	0	0	1	0
TGME49_216335	0	0	2	2.62222	0.276074	0	0	2	2	0.333333	0.271913	0	0	12	39.5531	0.024659	0	0	17	24.5232	0.03918	0.668	0	0	2	3.79421	0.208585	3.08045
TGME49_216370	0	0	0	0	1	0	0	1	1	0.5	-1	0	0	0	0	1	0	0	0	0	1	0	0	0	0	0	1	0
TGME49_216375	0	0	4	5.24444	0.160142	0	0	5	5	0.166667	0.0576107	0	0	5	16.4804	0.0572068	0	0	3	4.32763	0.187701	1.71418	0	0	1	1.89711	0.345172	2.59306
TGME49_216380	0	0	9	11.8	0.078125	0	0	6	6	0.142857	0.870717	0	0	7	23.0726	0.041541	0	0	2	2.88509	0.257395	2.63138	0	0	7	13.2797	0.0700293	0.753424
TGME49_216390	0	0	10	13.1111	0.0708661	0	0	11	11	0.0833333	0.233797	0	0	1	3.29609	0.23277	1	1.44254	11	15.868	0.144804	-0.684807	0	0	7	13.2797	0.0700293	-1.73287
TGME49_216400	0	0	0	0	1	0	0	0	0	1	0	0	0	0	0	1	1	1.44254	4	5.77017	0.36078	-1.47081	0	0	0	0	1	0
TGME49_216410	14	18.3556	28	36.7111	0.513259	25	25	55	55	0.464286	-0.144673	19	62.6257	16	52.7374	1.18401	45	64.9144	46	66.357	0.978584	-0.274915	14	26.5595	19	36.045	0.743946	-0.670413
TGME49_216415	14	18.3556	16	20.9778	0.880688	25	25	36	36	0.702703	-0.325716	19	62.6257	7	23.0726	2.64307	45	64.9144	29	41.8337	1.53884	-0.78037	14	26.5595	9	17.074	1.52482	-0.793579
TGME49_216420	0	0	0	0	1	0	0	0	0	1	0	0	0	0	0	1	0	0	0	0	1	0	0	0	0	0	1	0
TGME49_216430	0	0	28	36.7111	0.0265174	0	0	38	38	0.025641	-0.0484845	0	0	14	46.1453	0.021211	0	0	9	12.9829	0.071516	1.75345	0	0	20	37.9421	0.0256791	0.275781
TGME49_216435	0	0	10	13.1111	0.0708661	0	0	15	15	0.0625	-0.18124	0	0	7	23.0726	0.041541	0	0	9	12.9829	0.071516	0.783731	0	0	7	13.2797	0.0700293	0.753424
TGME49_216440	0	0	11	14.4222	0.0648415	0	0	9	9	0.1	0.625011	0	0	4	13.1844	0.0705002	0	0	9	12.9829	0.071516	0.0206387	0	0	8	15.1768	0.0618167	-0.18963
TGME49_216450	0	0	49	64.2444	0.015327	0	0	79	79	0.0125	-0.294145	0	0	17	56.0335	0.0175335	0	0	54	77.8973	0.0126747	-0.468166	0	0	34	64.5016	0.0152668	-0.19972
TGME49_216460	0	0	38	49.8222	0.0196764	0	0	58	58	0.0169492	-0.215255	0	0	20	65.9218	0.0149428	0	0	32	46.1614	0.0212038	0.50487	0	0	22	41.7363	0.0233993	0.647013
TGME49_216470	0	0	8	10.4889	0.0870406	0	0	6	6	0.142857	0.714812	0	0	2	6.59218	0.131714	0	0	11	15.868	0.059284	-1.1517	0	0	6	11.3826	0.0807582	-0.705733
TGME49_216480	0	0	2	2.62222	0.276074	0	0	6	6	0.142857	-0.95048	0	0	0	0	1	0	0	5	7.21271	0.121762	-3.03786	0	0	2	3.79421	0.208585	-2.26129
TGME49_216490	0	0	9	11.8	0.078125	0	0	18	18	0.0526316	-0.569856	0	0	16	52.7374	0.018609	0	0	14	20.1956	0.0471796	1.34216	0	0	5	9.48553	0.0953695	2.35753
TGME49_216500	0	0	2	2.62222	0.276074	0	0	3	3	0.25	-0.143125	0	0	1	3.29609	0.23277	0	0	0	0	1	2.10302	0	0	1	1.89711	0.345172	0.568411
TGME49_216510	0	0	4	5.24444	0.160142	0	0	10	10	0.0909091	-0.816858	0	0	3	9.88827	0.091842	0	0	9	12.9829	0.071516	-0.360888	0	0	2	3.79421	0.208585	1.18341
TGME49_216530	0	0	11	14.4222	0.0648415	0	0	14	14	0.0666667	0.0400482	0	0	5	16.4804	0.0572068	0	0	6	8.65526	0.103571	0.856356	0	0	7	13.2797	0.0700293	0.291772
TGME49_216540	0	0	5	6.55556	0.132353	0	0	3	3	0.25	0.917538	0	0	0	0	1	0	0	4	5.77017	0.147707	-2.75919	0	0	4	7.58842	0.116436	-3.10239
TGME49_216550	0	0	1	1.31111	0.432692	0	0	0	0	1	1.20859	0	0	0	0	1	0	0	1	1.44254	0.409409	-1.28838	0	0	0	0	1	0
TGME49_216560	0	0	9	11.8	0.078125	0	0	12	12	0.0769231	-0.0223678	0	0	2	6.59218	0.131714	0	0	5	7.21271	0.121762	-0.113345	0	0	6	11.3826	0.0807582	-0.705733
TGME49_216570	0	0	3	3.93333	0.202703	0	0	1	1	0.5	1.30256	0	0	1	3.29609	0.23277	0	0	2	2.88509	0.257395	0.145078	0	0	3	5.69132	0.149447	-0.639266
TGME49_216580	0	0	12	15.7333	0.059761	0	0	11	11	0.0833333	0.47969	0	0	3	9.88827	0.091842	0	0	4	5.77017	0.147707	0.68551	0	0	8	15.1768	0.0618167	-0.571156
TGME49_216585	0	0	0	0	1	0	0	1	1	0.5	-1	0	0	0	0	1	0	0	0	0	1	0	0	0	0	0	1	0
TGME49_216590	0	0	36	47.2	0.0207469	0	0	35	35	0.0277778	0.421036	0	0	11	36.257	0.0268406	0	0	28	40.3912	0.0241597	-0.151813	0	0	27	51.2219	0.0191491	-0.487143
TGME49_216600	0	0	8	10.4889	0.0870406	0	0	19	19	0.05	-0.799761	0	0	9	29.6648	0.0326107	0	0	22	31.7359	0.0305475	-0.0942917	0	0	5	9.48553	0.0953695	1.54818
TGME49_216610	0	0	2	2.62222	0.276074	0	0	5	5	0.166667	-0.728087	0	0	0	0	1	0	0	5	7.21271	0.121762	-3.03786	0	0	1	1.89711	0.345172	-1.53461
TGME49_216620	0	0	32	41.9556	0.0232799	0	0	29	29	0.0333333	0.517882	0	0	25	82.4022	0.0119901	0	0	14	20.1956	0.0471796	1.97632	0	0	23	43.6334	0.0224047	0.901961
TGME49_216630	0	0	8	10.4889	0.0870406	0	0	5	5	0.166667	0.937205	0	0	0	0	1	0	0	1	1.44254	0.409409	-1.28838	0	0	7	13.2797	0.0700293	-3.8359
TGME49_216640	0	0	4	5.24444	0.160142	0	0	15	15	0.0625	-1.35743	0	0	1	3.29609	0.23277	0	0	14	20.1956	0.0471796	-2.30267	0	0	2	3.79421	0.208585	-0.15827
TGME49_216650	0	0	134	175.689	0.00565967	0	0	159	159	0.00625	0.143139	0	0	52	171.397	0.00580058	0	0	136	196.186	0.00507136	-0.193824	0	0	93	176.431	0.005636	-0.0415253
TGME49_216660	0	0	12	15.7333	0.059761	0	0	16	16	0.0588235	-0.0228099	0	0	3	9.88827	0.091842	0	0	2	2.88509	0.257395	1.48676	0	0	10	18.9711	0.0500725	-0.875136
TGME49_216670	0	0	83	108.822	0.00910563	0	0	67	67	0.0147059	0.691563	0	0	19	62.6257	0.0157169	0	0	43	62.0293	0.0158656	0.013586	0	0	62	117.621	0.00843024	-0.898673
TGME49_216680	0	0	18	23.6	0.0406504	0	0	16	16	0.0588235	0.533124	0	0	7	23.0726	0.041541	0	0	12	17.3105	0.0546134	0.394721	0	0	12	22.7653	0.0420782	0.0185385
TGME49_216700	0	0	5	6.55556	0.132353	0	0	8	8	0.111111	-0.252387	0	0	8	26.3687	0.0365381	0	0	2	2.88509	0.257395	2.81651	0	0	5	9.48553	0.0953695	1.38413
TGME49_216710	0	0	1	1.31111	0.432692	0	0	1	1	0.5	0.208587	0	0	0	0	1	0	0	3	4.32763	0.187701	-2.41349	0	0	1	1.89711	0.345172	-1.53461
TGME49_216720	0	0	210	275.333	0.00361882	0	0	386	386	0.00258398	-0.485924	0	0	71	234.022	0.00425491	0	0	221	318.802	0.00312694	-0.444381	0	0	125	237.138	0.00419924	-0.0190015
TGME49_216730	0	0	51	66.8667	0.0147348	0	0	37	37	0.0263158	0.836704	0	0	21	69.2179	0.0142414	0	0	31	44.7188	0.0218728	0.61905	0	0	42	79.6785	0.0123949	-0.200345
TGME49_216740	0	0	5	6.55556	0.132353	0	0	14	14	0.0666667	-0.989353	0	0	3	9.88827	0.091842	0	0	6	8.65526	0.103571	0.173388	0	0	3	5.69132	0.149447	0.702412
TGME49_216750	0	0	34	44.5778	0.0219405	0	0	45	45	0.0217391	-0.0133033	0	0	11	36.257	0.0268406	0	0	48	69.2421	0.0142365	-0.914824	0	0	22	41.7363	0.0233993	-0.197952
TGME49_216760	0	0	4	5.24444	0.160142	0	0	4	4	0.2	0.320645	0	0	2	6.59218	0.131714	0	0	6	8.65526	0.103571	-0.346801	0	0	4	7.58842	0.116436	-0.17788
TGME49_216770	0	0	166	217.644	0.00457364	0	0	66	66	0.0149254	1.70635	0	0	74	243.911	0.00408312	0	0	58	83.6675	0.0118109	1.53238	0	0	110	208.682	0.00476913	0.224055
TGME49_216780	0	0	10	13.1111	0.0708661	0	0	20	20	0.047619	-0.573558	0	0	7	23.0726	0.041541	0	0	21	30.2934	0.0319556	-0.378465	0	0	8	15.1768	0.0618167	0.573463
TGME49_216785	9	11.8	11	14.4222	0.829971	6	6	6	6	1	0.268867	9	29.6648	0	0	30.6648	11	15.868	5	7.21271	2.05389	-3.90016	9	17.074	7	13.2797	1.26571	-4.59857
TGME49_216790	9	11.8	35	45.8889	0.272986	6	6	27	27	0.25	-0.126898	9	29.6648	11	36.257	0.823062	11	15.868	18	25.9658	0.625533	-0.395916	9	17.074	21	39.8392	0.442564	-0.895116
TGME49_216800	3	3.93333	6	7.86667	0.556391	5	5	6	6	0.857143	0.623437	3	9.88827	2	6.59218	1.43414	7	10.0978	2	2.88509	2.85651	0.994067	3	5.69132	4	7.58842	0.779109	-0.880292
TGME49_216810	3	3.93333	31	40.6444	0.118463	5	5	49	49	0.12	0.0185957	3	9.88827	12	39.5531	0.268494	7	10.0978	17	24.5232	0.434812	0.6955	3	5.69132	21	39.8392	0.163845	-0.712556
TGME49_216820	0	0	60	78.6667	0.0125523	0	0	99	99	0.01	-0.327952	0	0	25	82.4022	0.0119901	0	0	66	95.2078	0.0103942	-0.206068	0	0	46	87.2669	0.0113293	-0.0817862
TGME49_216830	0	0	1	1.31111	0.432692	0	0	8	8	0.111111	-1.96134	0	0	0	0	1	0	0	12	17.3105	0.0546134	-4.1946	0	0	1	1.89711	0.345172	-1.53461
TGME49_216840	0	0	1	1.31111	0.432692	0	0	4	4	0.2	-1.11334	0	0	0	0	1	0	0	0	0	1	0	0	0	1	1.89711	0.345172	-1.53461
TGME49_216850	0	0	8	10.4889	0.0870406	0	0	7	7	0.125	0.522167	0	0	3	9.88827	0.091842	0	0	5	7.21271	0.121762	0.406844	0	0	7	13.2797	0.0700293	-0.391195
TGME49_216860	0	0	306	401.2	0.00248633	0	0	364	364	0.00273973	0.140017	0	0	77	253.799	0.00392466	0	0	259	373.619	0.00266938	-0.556064	0	0	216	409.775	0.00243442	-0.688989
TGME49_216870	0	0	7	9.17778	0.0982533	0	0	5	5	0.166667	0.762388	0	0	3	9.88827	0.091842	0	0	11	15.868	0.059284	-0.631512	0	0	6	11.3826	0.0807582	-0.185544
TGME49_216875	0	0	1	1.31111	0.432692	0	0	0	0	1	1.20859	0	0	0	0	1	0	0	0	0	1	0	0	0	1	1.89711	0.345172	-1.53461
TGME49_216880	0	0	684	896.8	0.00111383	0	0	819	819	0.00121951	0.13077	0	0	243	800.95	0.00124696	0	0	686	989.584	0.00100951	-0.304768	0	0	460	872.669	0.0011446	-0.123575
TGME49_216890	0	0	16	20.9778	0.0455005	0	0	29	29	0.0333333	-0.448917	0	0	2	6.59218	0.131714	0	0	12	17.3105	0.0546134	-1.27009	0	0	15	28.4566	0.0339483	-1.956
TGME49_216900	0	0	28	36.7111	0.0265174	0	0	49	49	0.02	-0.406938	0	0	17	56.0335	0.0175335	0	0	43	62.0293	0.0158656	-0.144213	0	0	20	37.9421	0.0256791	0.550479
TGME49_216910	0	0	50	65.5556	0.015025	0	0	111	111	0.00892857	-0.750868	0	0	21	69.2179	0.0142414	0	0	65	93.7653	0.0105524	-0.43252	0	0	28	53.119	0.0184778	0.375704
TGME49_216920	0	0	31	40.6444	0.0240128	0	0	41	41	0.0238095	-0.0122653	0	0	17	56.0335	0.0175335	0	0	32	46.1614	0.0212038	0.274204	0	0	19	36.045	0.0269942	0.622531
TGME49_216930	0	0	61	79.9778	0.0123491	0	0	83	83	0.0119048	-0.0528633	0	0	22	72.514	0.0136029	0	0	53	76.4548	0.0129108	-0.0753357	0	0	39	73.9871	0.0133356	-0.0286248
TGME49_216940	0	0	0	0	1	0	0	0	0	1	0	0	0	0	0	1	0	0	0	0	1	0	0	0	0	0	1	0
TGME49_216950	0	0	7	9.17778	0.0982533	0	0	3	3	0.25	1.34735	0	0	4	13.1844	0.0705002	0	0	9	12.9829	0.071516	0.0206387	0	0	5	9.48553	0.0953695	0.435901
TGME49_216960	0	0	3	3.93333	0.202703	0	0	6	6	0.142857	-0.504792	0	0	3	9.88827	0.091842	0	0	8	11.5403	0.0797426	-0.203802	0	0	2	3.79421	0.208585	1.18341
TGME49_216965	0	0	1	1.31111	0.432692	0	0	2	2	0.333333	-0.376376	0	0	1	3.29609	0.23277	0	0	3	4.32763	0.187701	-0.310469	0	0	1	1.89711	0.345172	0.568411
TGME49_216970	0	0	35	45.8889	0.021327	0	0	57	57	0.0172414	-0.306807	0	0	17	56.0335	0.0175335	0	0	38	54.8166	0.0179158	0.0311151	0	0	24	45.5305	0.0214913	0.293632
TGME49_216980	0	0	8	10.4889	0.0870406	0	0	14	14	0.0666667	-0.384723	0	0	0	0	1	0	0	13	18.7531	0.0506251	-4.304	0	0	5	9.48553	0.0953695	-3.39033
TGME49_216990	0	0	5	6.55556	0.132353	0	0	5	5	0.166667	0.332575	0	0	1	3.29609	0.23277	0	0	5	7.21271	0.121762	-0.934835	0	0	4	7.58842	0.116436	-0.999369
TGME49_217000	0	0	30	39.3333	0.0247934	0	0	54	54	0.0181818	-0.447459	0	0	12	39.5531	0.024659	0	0	26	37.5061	0.0259699	0.0747238	0	0	21	39.8392	0.0244863	-0.0101444
TGME49_217010	0	0	7	9.17778	0.0982533	0	0	5	5	0.166667	0.762388	0	0	3	9.88827	0.091842	0	0	15	21.6381	0.0441732	-1.05598	0	0	1	1.89711	0.345172	1.91009
TGME49_217020	0	0	34	44.5778	0.0219405	0	0	71	71	0.0138889	-0.659666	0	0	23	75.8101	0.0130191	0	0	37	53.3741	0.0183911	0.498376	0	0	21	39.8392	0.0244863	0.91134
TGME49_217030	0	0	13	17.0444	0.0554187	0	0	32	32	0.030303	-0.870911	0	0	8	26.3687	0.0365381	0	0	17	24.5232	0.03918	0.100717	0	0	11	20.8682	0.0457286	0.323695
TGME49_217040	0	0	0	0	1	0	0	1	1	0.5	-1	0	0	0	0	1	0	0	1	1.44254	0.409409	-1.28838	0	0	0	0	1	0
TGME49_217050	0	0	23	30.1556	0.032097	0	0	13	13	0.0714286	1.15406	0	0	8	26.3687	0.0365381	0	0	11	15.868	0.059284	0.698241	0	0	13	24.6624	0.0389675	0.0928728
TGME49_217160	0	0	0	0	1	0	0	6	6	0.142857	-2.80735	0	0	1	3.29609	0.23277	0	0	2	2.88509	0.257395	0.145078	0	0	0	0	1	2.10302
TGME49_217170	0	0	0	0	1	0	0	0	0	1	0	0	0	0	0	1	0	0	0	0	1	0	0	0	0	0	1	0
TGME49_217178	0	0	0	0	1	0	0	0	0	1	0	0	0	0	0	1	0	0	0	0	1	0	0	0	0	0	1	0
TGME49_217182	0	0	17	22.2889	0.0429389	0	0	13	13	0.0714286	0.734215	0	0	18	59.3296	0.0165756	0	0	12	17.3105	0.0546134	1.72019	0	0	11	20.8682	0.0457286	1.46403
TGME49_217220	0	0	15	19.6667	0.0483871	0	0	20	20	0.047619	-0.0230836	0	0	12	39.5531	0.024659	0	0	14	20.1956	0.0471796	0.936046	0	0	7	13.2797	0.0700293	1.50584
TGME49_217340	0	0	5	6.55556	0.132353	0	0	2	2	0.333333	1.33258	0	0	0	0	1	0	0	6	8.65526	0.103571	-3.27131	0	0	4	7.58842	0.116436	-3.10239
TGME49_217350	0	0	15	19.6667	0.0483871	0	0	15	15	0.0625	0.369234	0	0	1	3.29609	0.23277	0	0	2	2.88509	0.257395	0.145078	0	0	10	18.9711	0.0500725	-2.21682
TGME49_217360	0	0	3	3.93333	0.202703	0	0	6	6	0.142857	-0.504792	0	0	3	9.88827	0.091842	0	0	4	5.77017	0.147707	0.68551	0	0	3	5.69132	0.149447	0.702412
TGME49_217370	0	0	0	0	1	0	0	0	0	1	0	0	0	0	0	1	0	0	0	0	1	0	0	0	0	0	1	0
TGME49_217380	0	0	0	0	1	0	0	0	0	1	0	0	0	0	0	1	0	0	0	0	1	0	0	0	0	0	1	0
TGME49_217390	0	0	0	0	1	0	0	0	0	1	0	0	0	0	0	1	0	0	0	0	1	0	0	0	0	0	1	0
TGME49_217400	0	0	27	35.4	0.0274725	0	0	37	37	0.0263158	-0.062061	0	0	17	56.0335	0.0175335	0	0	34	49.0465	0.0199814	0.188542	0	0	20	37.9421	0.0256791	0.550479
TGME49_217410	0	0	10	13.1111	0.0708661	0	0	12	12	0.0769231	0.11832	0	0	1	3.29609	0.23277	0	0	13	18.7531	0.0506251	-2.20098	0	0	4	7.58842	0.116436	-0.999369
TGME49_217420	0	0	22	28.8444	0.0335071	0	0	26	26	0.037037	0.144503	0	0	7	23.0726	0.041541	0	0	16	23.0807	0.0415271	-0.000482897	0	0	16	30.3537	0.0318942	-0.381242
TGME49_217430	0	0	22	28.8444	0.0335071	0	0	33	33	0.0294118	-0.188072	0	0	7	23.0726	0.041541	0	0	21	30.2934	0.0319556	-0.378465	0	0	16	30.3537	0.0318942	-0.381242
TGME49_217440	0	0	17	22.2889	0.0429389	1	1	28	28	0.0689655	0.683589	0	0	7	23.0726	0.041541	2	2.88509	14	20.1956	0.183297	2.14158	0	0	9	17.074	0.0553282	0.413481
TGME49_217450	0	0	13	17.0444	0.0554187	1	1	31	31	0.0625	0.173483	0	0	8	26.3687	0.0365381	4	5.77017	16	23.0807	0.281145	2.94384	0	0	8	15.1768	0.0618167	0.758597
TGME49_217460	0	0	66	86.5333	0.0114242	0	0	106	106	0.00934579	-0.289706	0	0	40	131.844	0.00752765	2	2.88509	66	95.2078	0.0403822	2.42345	0	0	44	83.4727	0.0118381	0.653172
TGME49_217470	0	0	2	2.62222	0.276074	0	0	5	5	0.166667	-0.728087	0	0	0	0	1	0	0	2	2.88509	0.257395	-1.95795	0	0	2	3.79421	0.208585	-2.26129
TGME49_217480	0	0	20	26.2222	0.0367347	0	0	22	22	0.0434783	0.243151	0	0	4	13.1844	0.0705002	2	2.88509	17	24.5232	0.152218	1.11044	0	0	16	30.3537	0.0318942	-1.14433
TGME49_217490	0	0	0	0	1	0	0	1	1	0.5	-1	0	0	0	0	1	2	2.88509	8	11.5403	0.309807	-1.69056	0	0	0	0	1	0
TGME49_217500	0	0	13	17.0444	0.0554187	0	0	38	38	0.025641	-1.11192	0	0	8	26.3687	0.0365381	0	0	26	37.5061	0.0259699	-0.49256	0	0	7	13.2797	0.0700293	0.938558
TGME49_217510	0	0	226	296.311	0.00336348	1	1	197	197	0.010101	1.58647	0	0	97	319.721	0.00311798	2	2.88509	121	174.548	0.0221312	2.8274	0	0	152	288.36	0.0034559	0.148451
TGME49_217520	0	0	241	315.978	0.0031548	0	0	159	159	0.00625	0.98631	0	0	89	293.352	0.00339729	0	0	113	163.007	0.00609729	0.843782	0	0	173	328.199	0.00303767	-0.161419
TGME49_217530	0	0	57	74.7333	0.0132042	1	1	99	99	0.02	0.599	0	0	35	115.363	0.00859379	2	2.88509	41	59.1443	0.0645961	2.91008	0	0	37	70.1929	0.0140463	0.708828
TGME49_217540	0	0	59	77.3556	0.0127623	0	0	74	74	0.0133333	0.063145	0	0	16	52.7374	0.018609	0	0	61	87.9951	0.0112366	-0.727799	0	0	36	68.2958	0.0144309	-0.366841
TGME49_217550	0	0	95	124.556	0.0079646	0	0	167	167	0.00595238	-0.420135	0	0	40	131.844	0.00752765	0	0	123	177.433	0.00560435	-0.425652	0	0	62	117.621	0.00843024	0.163374
TGME49_217555	0	0	169	221.578	0.00449281	0	0	216	216	0.00460829	0.0366145	0	0	69	227.43	0.00437771	0	0	168	242.347	0.00410936	-0.0912629	0	0	122	231.447	0.00430206	-0.0251483
TGME49_217560	0	0	88	115.378	0.00859271	0	0	164	164	0.00606061	-0.50365	0	0	33	108.771	0.00910988	0	0	92	132.714	0.00747865	-0.284654	0	0	61	115.723	0.00856726	-0.0885984
TGME49_217570	0	0	2425	3179.44	0.000314421	0	0	3507	3507	0.000285063	-0.14142	0	0	806	2656.65	0.000376273	0	0	2385	3440.46	0.000290574	-0.372873	0	0	1656	3141.61	0.000318207	-0.241812
TGME49_217580	0	0	11	14.4222	0.0648415	0	0	21	21	0.0454545	-0.512493	0	0	7	23.0726	0.041541	0	0	17	24.5232	0.03918	-0.0844173	0	0	8	15.1768	0.0618167	0.573463
TGME49_217590	0	0	8	10.4889	0.0870406	0	0	10	10	0.0909091	0.0627358	0	0	1	3.29609	0.23277	0	0	3	4.32763	0.187701	-0.310469	0	0	7	13.2797	0.0700293	-1.73287
TGME49_217600	0	0	42	55.0667	0.0178359	0	0	47	47	0.0208333	0.224109	0	0	13	42.8492	0.0228055	0	0	24	34.621	0.0280733	0.29982	0	0	31	58.8103	0.0167195	-0.447844
TGME49_217610	0	0	17	22.2889	0.0429389	0	0	28	28	0.0344828	-0.316411	0	0	10	32.9609	0.0294456	0	0	11	15.868	0.059284	1.00959	0	0	14	26.5595	0.0362851	0.301325
TGME49_217620	0	0	2	2.62222	0.276074	0	0	9	9	0.1	-1.46505	0	0	5	16.4804	0.0572068	0	0	4	5.77017	0.147707	1.36848	0	0	1	1.89711	0.345172	2.59306
TGME49_217630	0	0	0	0	1	0	0	0	0	1	0	0	0	0	0	1	0	0	0	0	1	0	0	0	0	0	1	0
TGME49_217640	0	0	34	44.5778	0.0219405	0	0	59	59	0.0166667	-0.396632	0	0	13	42.8492	0.0228055	0	0	44	63.4719	0.0155106	-0.556121	0	0	23	43.6334	0.0224047	-0.0255757
TGME49_217650	0	0	0	0	1	0	0	0	0	1	0	0	0	0	0	1	0	0	0	0	1	0	0	0	0	0	1	0
TGME49_217660	0	0	22	28.8444	0.0335071	0	0	51	51	0.0192308	-0.801049	0	0	10	32.9609	0.0294456	0	0	30	43.2763	0.0225855	-0.38266	0	0	14	26.5595	0.0362851	0.301325
TGME49_217665	0	0	32	41.9556	0.0232799	0	0	57	57	0.0172414	-0.433208	0	0	10	32.9609	0.0294456	0	0	33	47.6039	0.0205745	-0.517198	0	0	22	41.7363	0.0233993	-0.331589
TGME49_217670	0	0	5	6.55556	0.132353	0	0	2	2	0.333333	1.33258	0	0	0	0	1	0	0	4	5.77017	0.147707	-2.75919	0	0	4	7.58842	0.116436	-3.10239
TGME49_217680	0	0	63	82.6	0.0119617	0	0	86	86	0.0114943	-0.0575125	0	0	26	85.6983	0.0115342	0	0	51	73.5697	0.0134103	0.217415	0	0	42	79.6785	0.0123949	0.103821
TGME49_217688	0	0	4	5.24444	0.160142	0	0	5	5	0.166667	0.0576107	0	0	3	9.88827	0.091842	0	0	4	5.77017	0.147707	0.68551	0	0	2	3.79421	0.208585	1.18341
TGME49_217692	0	0	5	6.55556	0.132353	0	0	7	7	0.125	-0.0824622	0	0	1	3.29609	0.23277	0	0	1	1.44254	0.409409	0.81464	0	0	4	7.58842	0.116436	-0.999369
TGME49_217700	0	0	11	14.4222	0.0648415	0	0	7	7	0.125	0.946939	0	0	3	9.88827	0.091842	0	0	6	8.65526	0.103571	0.173388	0	0	8	15.1768	0.0618167	-0.571156
TGME49_217710	0	0	0	0	1	0	0	0	0	1	0	0	0	0	0	1	0	0	0	0	1	0	0	0	0	0	1	0
TGME49_217720	0	0	4	5.24444	0.160142	0	0	5	5	0.166667	0.0576107	0	0	0	0	1	0	0	1	1.44254	0.409409	-1.28838	0	0	4	7.58842	0.116436	-3.10239
TGME49_217722	0	0	0	0	1	0	0	0	0	1	0	0	0	0	0	1	0	0	0	0	1	0	0	0	0	0	1	0
TGME49_217724	0	0	2	2.62222	0.276074	0	0	7	7	0.125	-1.14312	0	0	2	6.59218	0.131714	0	0	1	1.44254	0.409409	1.63613	0	0	2	3.79421	0.208585	0.66322
TGME49_217726	0	0	3	3.93333	0.202703	0	0	11	11	0.0833333	-1.2824	0	0	6	19.7765	0.0481312	0	0	5	7.21271	0.121762	1.33902	0	0	1	1.89711	0.345172	2.84227
TGME49_217728	0	0	3	3.93333	0.202703	0	0	12	12	0.0769231	-1.39788	0	0	6	19.7765	0.0481312	0	0	5	7.21271	0.121762	1.33902	0	0	3	5.69132	0.149447	1.63459
TGME49_217730	0	0	4	5.24444	0.160142	0	0	8	8	0.111111	-0.527352	0	0	1	3.29609	0.23277	0	0	3	4.32763	0.187701	-0.310469	0	0	3	5.69132	0.149447	-0.639266
TGME49_217740	21	27.5333	28	36.7111	0.756629	18	18	20	20	0.904762	0.257951	26	85.6983	7	23.0726	3.60153	39	56.2592	27	38.9487	1.43332	-1.32925	21	39.8392	14	26.5595	1.48186	-1.2812
TGME49_217750	21	27.5333	37	48.5111	0.576302	18	18	35	35	0.527778	-0.126893	26	85.6983	13	42.8492	1.97719	39	56.2592	35	50.489	1.11207	-0.830212	21	39.8392	23	43.6334	0.914992	-1.11162
TGME49_217760	0	0	7	9.17778	0.0982533	0	0	31	31	0.03125	-1.65265	0	0	4	13.1844	0.0705002	0	0	17	24.5232	0.03918	-0.84751	0	0	4	7.58842	0.116436	0.723835
TGME49_217770	0	0	17	22.2889	0.0429389	0	0	17	17	0.0555556	0.371645	0	0	5	16.4804	0.0572068	0	0	6	8.65526	0.103571	0.856356	0	0	10	18.9711	0.0500725	-0.192169
TGME49_217780	0	0	7	9.17778	0.0982533	0	0	8	8	0.111111	0.177426	0	0	2	6.59218	0.131714	0	0	6	8.65526	0.103571	-0.346801	0	0	5	9.48553	0.0953695	-0.465814
TGME49_217790	0	0	1	1.31111	0.432692	0	0	1	1	0.5	0.208587	0	0	0	0	1	0	0	0	0	1	0	0	0	1	1.89711	0.345172	-1.53461
TGME49_217800	0	0	0	0	1	0	0	0	0	1	0	0	0	0	0	1	0	0	0	0	1	0	0	0	0	0	1	0
TGME49_217810	0	0	0	0	1	0	0	0	0	1	0	0	0	0	0	1	0	0	0	0	1	0	0	0	0	0	1	0
TGME49_217820	0	0	43	56.3778	0.0174284	0	0	52	52	0.0188679	0.1145	0	0	15	49.4413	0.019825	0	0	55	79.3399	0.0124471	-0.671509	0	0	26	49.3248	0.0198709	0.00333827
TGME49_217830	0	0	7	9.17778	0.0982533	0	0	2	2	0.333333	1.76239	0	0	6	19.7765	0.0481312	0	0	10	14.4254	0.064828	0.429645	0	0	3	5.69132	0.149447	1.63459
TGME49_217850	0	0	4	5.24444	0.160142	0	0	3	3	0.25	0.642573	0	0	2	6.59218	0.131714	0	0	0	0	1	2.92451	0	0	3	5.69132	0.149447	0.182223
TGME49_217855	0	0	0	0	1	0	0	0	0	1	0	0	0	0	0	1	0	0	0	0	1	0	0	0	0	0	1	0
TGME49_217860	0	0	0	0	1	0	0	1	1	0.5	-1	0	0	0	0	1	0	0	1	1.44254	0.409409	-1.28838	0	0	0	0	1	0
TGME49_217870	0	0	33	43.2667	0.0225904	0	0	44	44	0.0222222	-0.0237043	0	0	9	29.6648	0.0326107	0	0	26	37.5061	0.0259699	-0.328504	0	0	26	49.3248	0.0198709	-0.714685
TGME49_217875	0	0	4	5.24444	0.160142	0	0	11	11	0.0833333	-0.942389	0	0	0	0	1	1	1.44254	7	10.0978	0.220093	-2.18382	0	0	3	5.69132	0.149447	-2.74229
TGME49_217880	0	0	8	10.4889	0.0870406	0	0	16	16	0.0588235	-0.565295	0	0	1	3.29609	0.23277	1	1.44254	10	14.4254	0.158345	-0.555831	0	0	7	13.2797	0.0700293	-1.73287
TGME49_217890	1	1.31111	344	451.022	0.00511283	6	6	498	498	0.0140281	1.45612	2	6.59218	134	441.676	0.0171506	12	17.3105	376	542.396	0.0336964	0.974333	1	1.89711	232	440.129	0.00656749	-1.38485
TGME49_217900	1	1.31111	20	26.2222	0.084898	6	6	32	32	0.212121	1.32109	2	6.59218	7	23.0726	0.315386	12	17.3105	20	28.8509	0.6134	0.959708	1	1.89711	14	26.5595	0.105122	-1.58506
TGME49_217910	0	0	35	45.8889	0.021327	0	0	34	34	0.0285714	0.421891	0	0	13	42.8492	0.0228055	0	0	16	23.0807	0.0415271	0.864673	0	0	20	37.9421	0.0256791	0.171218
TGME49_217915	0	0	1	1.31111	0.432692	0	0	4	4	0.2	-1.11334	0	0	0	0	1	0	0	4	5.77017	0.147707	-2.75919	0	0	1	1.89711	0.345172	-1.53461
TGME49_217920	0	0	0	0	1	0	0	0	0	1	0	0	0	0	0	1	0	0	0	0	1	0	0	0	0	0	1	0
TGME49_217930	0	0	0	0	1	0	0	0	0	1	0	0	0	0	0	1	1	1.44254	1	1.44254	1	0	0	0	0	0	1	0
TGME49_217940	0	0	0	0	1	0	0	2	2	0.333333	-1.58496	0	0	0	0	1	1	1.44254	0	0	2.44254	1.28838	0	0	0	0	1	0
TGME49_217951	0	0	0	0	1	0	0	0	0	1	0	0	0	0	0	1	0	0	1	1.44254	0.409409	-1.28838	0	0	0	0	1	0
TGME49_217961	0	0	0	0	1	0	0	7	7	0.125	-3	0	0	0	0	1	0	0	8	11.5403	0.0797426	-3.6485	0	0	0	0	1	0
TGME49_218000	0	0	3	3.93333	0.202703	0	0	1	1	0.5	1.30256	0	0	0	0	1	0	0	3	4.32763	0.187701	-2.41349	0	0	3	5.69132	0.149447	-2.74229
TGME49_218070	0	0	6	7.86667	0.112782	0	0	8	8	0.111111	-0.0215332	0	0	5	16.4804	0.0572068	0	0	5	7.21271	0.121762	1.08981	0	0	6	11.3826	0.0807582	0.497424
TGME49_218130	0	0	0	0	1	0	0	1	1	0.5	-1	0	0	0	0	1	0	0	0	0	1	0	0	0	0	0	1	0
TGME49_218188	0	0	0	0	1	0	0	1	1	0.5	-1	0	0	0	0	1	0	0	0	0	1	0	0	0	0	0	1	0
TGME49_218192	0	0	1	1.31111	0.432692	0	0	3	3	0.25	-0.791413	0	0	0	0	1	0	0	2	2.88509	0.257395	-1.95795	0	0	1	1.89711	0.345172	-1.53461
TGME49_218195	2	2.62222	2	2.62222	1	1	1	1	1	1	0	2	6.59218	0	0	7.59218	1	1.44254	0	0	2.44254	-1.63613	2	3.79421	1	1.89711	1.65483	-2.19783
TGME49_218200	2	2.62222	5	6.55556	0.479412	1	1	3	3	0.5	0.0606628	2	6.59218	1	3.29609	1.76723	1	1.44254	4	5.77017	0.36078	-2.2923	2	3.79421	4	7.58842	0.558218	-1.66259
TGME49_218210	0	0	0	0	1	0	0	0	0	1	0	0	0	0	0	1	0	0	0	0	1	0	0	0	0	0	1	0
TGME49_218215	0	0	0	0	1	0	0	0	0	1	0	0	0	0	0	1	0	0	0	0	1	0	0	0	0	0	1	0
TGME49_218220	0	0	17	22.2889	0.0429389	0	0	28	28	0.0344828	-0.316411	0	0	4	13.1844	0.0705002	0	0	19	27.4083	0.035201	-1.00201	0	0	16	30.3537	0.0318942	-1.14433
TGME49_218230	0	0	14	18.3556	0.0516648	0	0	12	12	0.0769231	0.574236	0	0	4	13.1844	0.0705002	0	0	8	11.5403	0.0797426	0.177724	0	0	10	18.9711	0.0500725	-0.49361
TGME49_218240	0	0	88	115.378	0.00859271	0	0	68	68	0.0144928	0.754147	0	0	30	98.8827	0.0100117	0	0	51	73.5697	0.0134103	0.421645	0	0	63	119.518	0.00829754	-0.270938
TGME49_218250	0	0	34	44.5778	0.0219405	0	0	32	32	0.030303	0.465865	0	0	8	26.3687	0.0365381	0	0	19	27.4083	0.035201	-0.0537855	0	0	24	45.5305	0.0214913	-0.76565
TGME49_218260	0	0	574	752.578	0.001327	0	0	862	862	0.00115875	-0.195604	0	0	181	596.592	0.00167338	0	0	521	751.565	0.00132879	-0.332655	0	0	391	741.768	0.00134631	-0.313751
TGME49_218270	0	0	125	163.889	0.00606469	0	0	151	151	0.00657895	0.117423	0	0	43	141.732	0.00700615	0	0	85	122.616	0.00808956	0.20744	0	0	85	161.254	0.00616318	-0.184947
TGME49_218280	0	0	65	85.2222	0.0115979	0	0	93	93	0.0106383	-0.124601	0	0	31	102.179	0.00969192	0	0	53	76.4548	0.0129108	0.41372	0	0	42	79.6785	0.0123949	0.354891
TGME49_218290	0	0	0	0	1	0	0	0	0	1	0	0	0	0	0	1	0	0	1	1.44254	0.409409	-1.28838	0	0	0	0	1	0
TGME49_218300	0	0	32	41.9556	0.0232799	0	0	46	46	0.0212766	-0.129816	0	0	10	32.9609	0.0294456	0	0	14	20.1956	0.0471796	0.68011	0	0	20	37.9421	0.0256791	-0.197457
TGME49_218310	0	0	24	31.4667	0.0308008	0	0	40	40	0.0243902	-0.336665	0	0	14	46.1453	0.021211	0	0	32	46.1614	0.0212038	-0.000493137	0	0	19	36.045	0.0269942	0.347833
TGME49_218340	0	0	0	0	1	0	0	0	0	1	0	0	0	0	0	1	0	0	0	0	1	0	0	0	0	0	1	0
TGME49_218350	0	0	0	0	1	0	0	0	0	1	0	0	0	0	0	1	0	0	0	0	1	0	0	0	0	0	1	0
TGME49_218358	0	0	13	17.0444	0.0554187	0	0	18	18	0.0526316	-0.0744447	0	0	8	26.3687	0.0365381	0	0	10	14.4254	0.064828	0.827217	0	0	10	18.9711	0.0500725	0.454617
TGME49_218362	0	0	13	17.0444	0.0554187	0	0	15	15	0.0625	0.173483	0	0	4	13.1844	0.0705002	0	0	7	10.0978	0.090108	0.354027	0	0	7	13.2797	0.0700293	-0.00966918
TGME49_218370	0	0	50	65.5556	0.015025	0	0	59	59	0.0166667	0.149597	0	0	16	52.7374	0.018609	0	0	38	54.8166	0.0179158	-0.0547676	0	0	34	64.5016	0.0152668	-0.285603
TGME49_218380	0	0	0	0	1	0	0	0	0	1	0	0	0	0	0	1	0	0	0	0	1	0	0	0	0	0	1	0
TGME49_218390	0	0	0	0	1	0	0	0	0	1	0	0	0	1	3.29609	0.23277	0	0	1	1.44254	0.409409	0.81464	0	0	0	0	1	2.10302
TGME49_218400	0	0	0	0	1	0	0	3	3	0.25	-2	0	0	1	3.29609	0.23277	0	0	1	1.44254	0.409409	0.81464	0	0	0	0	1	2.10302
TGME49_218410	0	0	569	746.022	0.00133865	0	0	696	696	0.00143472	0.0999925	0	0	204	672.402	0.001485	0	0	538	776.088	0.00128686	-0.20661	0	0	379	719.003	0.00138888	-0.0965348
TGME49_218420	0	0	26	34.0889	0.0284991	0	0	36	36	0.027027	-0.076511	0	0	18	59.3296	0.0165756	0	0	45	64.9144	0.0151712	-0.127728	0	0	17	32.2508	0.0300745	0.859477
TGME49_218430	0	0	0	0	1	0	0	0	0	1	0	0	0	0	0	1	0	0	0	0	1	0	0	0	0	0	1	0
TGME49_218440	0	0	0	0	1	0	0	0	0	1	0	0	0	0	0	1	0	0	0	0	1	0	0	0	0	0	1	0
TGME49_218450	0	0	0	0	1	0	0	0	0	1	0	0	0	0	0	1	0	0	0	0	1	0	0	0	0	0	1	0
TGME49_218460	0	0	0	0	1	0	0	0	0	1	0	0	0	0	0	1	0	0	0	0	1	0	0	0	0	0	1	0
TGME49_218470	0	0	0	0	1	0	0	0	0	1	0	0	0	0	0	1	0	0	1	1.44254	0.409409	-1.28838	0	0	0	0	1	0
TGME49_218480	0	0	0	0	1	0	0	0	0	1	0	0	0	0	0	1	0	0	0	0	1	0	0	0	0	0	1	0
TGME49_218490	0	0	2	2.62222	0.276074	0	0	6	6	0.142857	-0.95048	0	0	2	6.59218	0.131714	0	0	2	2.88509	0.257395	0.966568	0	0	1	1.89711	0.345172	1.3899
TGME49_218500	0	0	0	0	1	0	0	1	1	0.5	-1	0	0	0	0	1	0	0	0	0	1	0	0	0	0	0	1	0
TGME49_218510	0	0	2	2.62222	0.276074	0	0	3	3	0.25	-0.143125	0	0	1	3.29609	0.23277	0	0	4	5.77017	0.147707	-0.656168	0	0	1	1.89711	0.345172	0.568411
TGME49_218520	0	0	655	858.778	0.00116309	0	0	893	893	0.00111857	-0.056311	0	0	225	741.62	0.00134658	0	0	477	688.093	0.00145118	0.107926	0	0	450	853.698	0.00117	-0.20279
TGME49_218530	0	0	69	90.4667	0.0109329	0	0	51	51	0.0192308	0.814734	0	0	25	82.4022	0.0119901	0	0	41	59.1443	0.0166267	0.471659	0	0	42	79.6785	0.0123949	0.0479026
TGME49_218540	0	0	51	66.8667	0.0147348	0	0	67	67	0.0147059	-0.00283159	0	0	20	65.9218	0.0149428	0	0	44	63.4719	0.0155106	0.0538059	0	0	34	64.5016	0.0152668	0.0309457
TGME49_218550	0	0	85	111.444	0.00889328	0	0	106	106	0.00934579	0.0716016	0	0	34	112.067	0.00884431	0	0	47	67.7995	0.014535	0.716708	0	0	64	121.415	0.00816895	-0.114599
TGME49_218560	0	0	14	18.3556	0.0516648	0	0	8	8	0.111111	1.10475	0	0	7	23.0726	0.041541	0	0	8	11.5403	0.0797426	0.940817	0	0	8	15.1768	0.0618167	0.573463
TGME49_218570	0	0	15	19.6667	0.0483871	0	0	29	29	0.0333333	-0.537657	0	0	15	49.4413	0.019825	0	0	12	17.3105	0.0546134	1.46193	0	0	10	18.9711	0.0500725	1.3367
TGME49_218580	0	0	7	9.17778	0.0982533	0	0	10	10	0.0909091	-0.112081	0	0	2	6.59218	0.131714	0	0	3	4.32763	0.187701	0.511021	0	0	5	9.48553	0.0953695	-0.465814
TGME49_218590	0	0	15	19.6667	0.0483871	0	0	24	24	0.04	-0.274622	0	0	7	23.0726	0.041541	0	0	17	24.5232	0.03918	-0.0844173	0	0	12	22.7653	0.0420782	0.0185385
TGME49_218600	0	0	6	7.86667	0.112782	0	0	20	20	0.047619	-1.24393	0	0	4	13.1844	0.0705002	0	0	12	17.3105	0.0546134	-0.368371	0	0	3	5.69132	0.149447	1.08394
TGME49_218610	0	0	6	7.86667	0.112782	0	0	11	11	0.0833333	-0.436571	0	0	1	3.29609	0.23277	0	0	5	7.21271	0.121762	-0.934835	0	0	4	7.58842	0.116436	-0.999369
TGME49_218720	0	0	18	23.6	0.0406504	0	0	24	24	0.04	-0.0232698	0	0	11	36.257	0.0268406	0	0	9	12.9829	0.071516	1.41385	0	0	14	26.5595	0.0362851	0.434962
TGME49_218730	0	0	34	44.5778	0.0219405	0	0	40	40	0.0243902	0.152707	0	0	16	52.7374	0.018609	0	0	34	49.0465	0.0199814	0.102659	0	0	23	43.6334	0.0224047	0.267802
TGME49_218740	0	0	49	64.2444	0.015327	0	0	64	64	0.0153846	0.00541534	0	0	17	56.0335	0.0175335	1	1.44254	35	50.489	0.0474381	1.43593	0	0	34	64.5016	0.0152668	-0.19972
TGME49_218750	0	0	40	52.4444	0.018711	0	0	47	47	0.0208333	0.155006	0	0	9	29.6648	0.0326107	1	1.44254	31	44.7188	0.0534253	0.712179	0	0	30	56.9132	0.0172672	-0.917308
TGME49_218760	0	0	18	23.6	0.0406504	0	0	30	30	0.0322581	-0.33361	0	0	6	19.7765	0.0481312	0	0	19	27.4083	0.035201	-0.451358	0	0	10	18.9711	0.0500725	0.0570442
TGME49_218770	0	0	4	5.24444	0.160142	0	0	2	2	0.333333	1.05761	0	0	0	0	1	0	0	0	0	1	0	0	0	2	3.79421	0.208585	-2.26129
TGME49_218780	0	0	159	208.467	0.00477403	0	0	181	181	0.00549451	0.202782	0	0	72	237.318	0.00419607	0	0	146	210.611	0.00472565	0.171474	0	0	98	185.916	0.00534999	0.350497
TGME49_218790	0	0	6	7.86667	0.112782	0	0	13	13	0.0714286	-0.658963	0	0	3	9.88827	0.091842	0	0	2	2.88509	0.257395	1.48676	0	0	5	9.48553	0.0953695	0.0543746
TGME49_218800	0	0	3	3.93333	0.202703	0	0	0	0	1	2.30256	0	0	1	3.29609	0.23277	0	0	2	2.88509	0.257395	0.145078	0	0	1	1.89711	0.345172	0.568411
TGME49_218810	0	0	21	27.5333	0.0350467	0	0	36	36	0.027027	-0.374877	0	0	10	32.9609	0.0294456	0	0	11	15.868	0.059284	1.00959	0	0	14	26.5595	0.0362851	0.301325
TGME49_218820	0	0	334	437.911	0.00227837	0	0	550	550	0.00181488	-0.328124	0	0	131	431.788	0.0023106	0	0	443	639.046	0.00156239	-0.564517	0	0	237	449.614	0.00221919	-0.0582331
TGME49_218830	0	0	6	7.86667	0.112782	0	0	6	6	0.142857	0.341037	0	0	4	13.1844	0.0705002	0	0	5	7.21271	0.121762	0.78837	0	0	3	5.69132	0.149447	1.08394
TGME49_218840	0	0	7	9.17778	0.0982533	0	0	9	9	0.1	0.0254226	0	0	9	29.6648	0.0326107	0	0	10	14.4254	0.064828	0.991273	0	0	6	11.3826	0.0807582	1.30827
TGME49_218850	0	0	23	30.1556	0.032097	0	0	28	28	0.0344828	0.103437	0	0	7	23.0726	0.041541	0	0	18	25.9658	0.0370841	-0.163736	0	0	21	39.8392	0.0244863	-0.762562
TGME49_218860	0	0	0	0	1	0	0	1	1	0.5	-1	0	0	0	0	1	1	1.44254	4	5.77017	0.36078	-1.47081	0	0	0	0	1	0
TGME49_218870	0	0	8	10.4889	0.0870406	0	0	16	16	0.0588235	-0.565295	0	0	3	9.88827	0.091842	1	1.44254	11	15.868	0.144804	0.656872	0	0	4	7.58842	0.116436	0.342309
TGME49_218880	0	0	32	41.9556	0.0232799	0	0	53	53	0.0185185	-0.330115	0	0	14	46.1453	0.021211	0	0	33	47.6039	0.0205745	-0.04396	0	0	24	45.5305	0.0214913	0.0189343
TGME49_218890	0	0	1	1.31111	0.432692	0	0	0	0	1	1.20859	0	0	0	0	1	0	0	0	0	1	0	0	0	1	1.89711	0.345172	-1.53461
TGME49_218900	0	0	0	0	1	0	0	0	0	1	0	0	0	0	0	1	0	0	0	0	1	0	0	0	0	0	1	0
TGME49_218910	0	0	31	40.6444	0.0240128	0	0	54	54	0.0181818	-0.401308	0	0	14	46.1453	0.021211	0	0	42	60.5868	0.0162372	-0.385509	0	0	21	39.8392	0.0244863	0.207157
TGME49_218920	0	0	75	98.3333	0.0100671	0	0	93	93	0.0106383	0.0796172	0	0	20	65.9218	0.0149428	0	0	49	70.6846	0.01395	-0.0991872	0	0	48	91.0611	0.0108624	-0.460116
TGME49_218930	0	0	4	5.24444	0.160142	0	0	2	2	0.333333	1.05761	0	0	0	0	1	0	0	0	0	1	0	0	0	3	5.69132	0.149447	-2.74229
TGME49_218940	0	0	48	62.9333	0.0156413	0	0	76	76	0.012987	-0.26829	0	0	12	39.5531	0.024659	0	0	57	82.2249	0.0120156	-1.0372	0	0	31	58.8103	0.0167195	-0.560582
TGME49_218950	0	0	2	2.62222	0.276074	0	0	3	3	0.25	-0.143125	0	0	3	9.88827	0.091842	0	0	9	12.9829	0.071516	-0.360888	0	0	1	1.89711	0.345172	1.91009
TGME49_218955	0	0	0	0	1	0	0	0	0	1	0	0	0	0	0	1	0	0	0	0	1	0	0	0	0	0	1	0
TGME49_218960	0	0	25	32.7778	0.0296053	0	0	23	23	0.0416667	0.49304	0	0	6	19.7765	0.0481312	0	0	14	20.1956	0.0471796	-0.0288096	0	0	15	28.4566	0.0339483	-0.503635
TGME49_219070	0	0	13	17.0444	0.0554187	0	0	11	11	0.0833333	0.58852	0	0	8	26.3687	0.0365381	0	0	11	15.868	0.059284	0.698241	0	0	7	13.2797	0.0700293	0.938558
TGME49_219080	0	0	11	14.4222	0.0648415	0	0	17	17	0.0555556	-0.222986	0	0	6	19.7765	0.0481312	0	0	24	34.621	0.0280733	-0.777774	0	0	8	15.1768	0.0618167	0.361025
TGME49_219090	0	0	0	0	1	0	0	1	1	0.5	-1	0	0	0	0	1	1	1.44254	1	1.44254	1	0	0	0	0	0	1	0
TGME49_219100	0	0	23	30.1556	0.032097	0	0	28	28	0.0344828	0.103437	0	0	4	13.1844	0.0705002	1	1.44254	16	23.0807	0.101432	0.524808	0	0	18	34.1479	0.0284512	-1.30914
TGME49_219110	0	0	0	0	1	0	0	0	0	1	0	0	0	0	0	1	0	0	0	0	1	0	0	0	0	0	1	0
TGME49_219120	0	0	42	55.0667	0.0178359	0	0	46	46	0.0212766	0.254483	0	0	19	62.6257	0.0157169	0	0	13	18.7531	0.0506251	1.68753	0	0	23	43.6334	0.0224047	0.511485
TGME49_219125	0	0	4	5.24444	0.160142	0	0	14	14	0.0666667	-1.26432	0	0	3	9.88827	0.091842	0	0	19	27.4083	0.035201	-1.38354	0	0	3	5.69132	0.149447	0.702412
TGME49_219130	0	0	23	30.1556	0.032097	0	0	26	26	0.037037	0.20653	0	0	7	23.0726	0.041541	0	0	32	46.1614	0.0212038	-0.970212	0	0	15	28.4566	0.0339483	-0.291197
TGME49_219140	0	0	166	217.644	0.00457364	0	0	195	195	0.00510204	0.157733	0	0	60	197.765	0.00503106	0	0	177	255.33	0.00390122	-0.366936	0	0	121	229.55	0.00433746	-0.214012
TGME49_219150	0	0	8	10.4889	0.0870406	0	0	14	14	0.0666667	-0.384723	0	0	3	9.88827	0.091842	0	0	11	15.868	0.059284	-0.631512	0	0	6	11.3826	0.0807582	-0.185544
TGME49_219160	0	0	0	0	1	0	0	0	0	1	0	0	0	0	0	1	0	0	0	0	1	0	0	0	0	0	1	0
TGME49_219170	14	18.3556	54	70.8	0.269576	18	18	33	33	0.558824	1.0517	19	62.6257	23	75.8101	0.828351	21	30.2934	22	31.7359	0.955934	0.206668	14	26.5595	42	79.6785	0.341597	-1.27795
TGME49_219175	14	18.3556	17	22.2889	0.831107	18	18	18	18	1	0.266894	19	62.6257	8	26.3687	2.32476	21	30.2934	8	11.5403	2.49542	0.1022	14	26.5595	14	26.5595	1	-1.21708
TGME49_219180	0	0	10	13.1111	0.0708661	0	0	16	16	0.0588235	-0.268703	0	0	3	9.88827	0.091842	0	0	12	17.3105	0.0546134	-0.749898	0	0	7	13.2797	0.0700293	-0.391195
TGME49_219190	0	0	41	53.7556	0.018263	0	0	47	47	0.0208333	0.189971	0	0	21	69.2179	0.0142414	0	0	29	41.8337	0.0233461	0.713091	0	0	30	56.9132	0.0172672	0.277947
TGME49_219200	0	0	16	20.9778	0.0455005	0	0	22	22	0.0434783	-0.0655883	0	0	7	23.0726	0.041541	0	0	20	28.8509	0.0334999	-0.310379	0	0	12	22.7653	0.0420782	0.0185385
TGME49_219210	0	0	14	18.3556	0.0516648	0	0	19	19	0.05	-0.0472523	0	0	5	16.4804	0.0572068	0	0	10	14.4254	0.064828	0.180432	0	0	9	17.074	0.0553282	-0.0481702
TGME49_219218	0	0	1	1.31111	0.432692	0	0	0	0	1	1.20859	0	0	0	0	1	0	0	1	1.44254	0.409409	-1.28838	0	0	0	0	1	0
TGME49_219222	0	0	0	0	1	0	0	1	1	0.5	-1	0	0	0	0	1	0	0	0	0	1	0	0	0	0	0	1	0
TGME49_219230	2	2.62222	59	77.3556	0.046228	6	6	155	155	0.0448718	-0.0429587	3	9.88827	22	72.514	0.148112	10	14.4254	85	122.616	0.124785	-0.247241	2	3.79421	45	85.3698	0.055508	-1.41592
TGME49_219240	2	2.62222	97	127.178	0.0282594	6	6	227	227	0.0307018	0.119592	3	9.88827	45	148.324	0.0729171	10	14.4254	110	158.68	0.0966023	0.405801	2	3.79421	72	136.592	0.0348438	-1.06536
TGME49_219250	0	0	17	22.2889	0.0429389	0	0	24	24	0.04	-0.102286	0	0	7	23.0726	0.041541	0	0	19	27.4083	0.035201	-0.23892	0	0	13	24.6624	0.0389675	-0.0922614
TGME49_219260	0	0	6	7.86667	0.112782	0	0	21	21	0.0454545	-1.31104	0	0	11	36.257	0.0268406	0	0	17	24.5232	0.03918	0.5457	0	0	4	7.58842	0.116436	2.11705
TGME49_219270	0	0	342	448.4	0.00222519	0	0	426	426	0.00234192	0.0737641	0	0	115	379.05	0.00263123	0	0	378	545.281	0.00183056	-0.523453	0	0	225	426.849	0.00233727	-0.170911
TGME49_219280	0	0	27	35.4	0.0274725	0	0	30	30	0.0322581	0.23167	0	0	11	36.257	0.0268406	0	0	23	33.1785	0.0292582	0.124422	0	0	21	39.8392	0.0244863	-0.132445
TGME49_219290	0	0	14	18.3556	0.0516648	0	0	15	15	0.0625	0.274676	0	0	6	19.7765	0.0481312	0	0	18	25.9658	0.0370841	-0.376174	0	0	8	15.1768	0.0618167	0.361025
TGME49_219300	0	0	9	11.8	0.078125	0	0	22	22	0.0434783	-0.84549	0	0	3	9.88827	0.091842	0	0	9	12.9829	0.071516	-0.360888	0	0	6	11.3826	0.0807582	-0.185544
TGME49_219310	0	0	47	61.6222	0.0159688	0	0	66	66	0.0149254	-0.0974864	0	0	22	72.514	0.0136029	0	0	43	62.0293	0.0158656	0.221995	0	0	36	68.2958	0.0144309	0.08525
TGME49_219320	0	0	505	662.111	0.00150804	0	0	611	611	0.00163399	0.115719	0	0	164	540.559	0.00184652	1	1.44254	438	631.834	0.00385969	1.06367	0	0	331	627.942	0.00158997	-0.21581
TGME49_219348	0	0	0	0	1	0	0	1	1	0.5	-1	0	0	0	0	1	0	0	0	0	1	0	0	0	0	0	1	0
TGME49_219370	0	0	0	0	1	0	0	2	2	0.333333	-1.58496	0	0	0	0	1	1	1.44254	3	4.32763	0.458467	-1.12511	0	0	0	0	1	0
TGME49_219430	0	0	1	1.31111	0.432692	0	0	4	4	0.2	-1.11334	0	0	1	3.29609	0.23277	0	0	2	2.88509	0.257395	0.145078	0	0	1	1.89711	0.345172	0.568411
TGME49_219440	0	0	10	13.1111	0.0708661	0	0	9	9	0.1	0.496832	0	0	3	9.88827	0.091842	0	0	13	18.7531	0.0506251	-0.859301	0	0	7	13.2797	0.0700293	-0.391195
TGME49_219450	0	0	0	0	1	0	0	0	0	1	0	0	0	0	0	1	0	0	0	0	1	0	0	0	0	0	1	0
TGME49_219460	0	0	5	6.55556	0.132353	0	0	4	4	0.2	0.59561	0	0	0	0	1	0	0	4	5.77017	0.147707	-2.75919	0	0	3	5.69132	0.149447	-2.74229
TGME49_219470	0	0	0	0	1	0	0	0	0	1	0	0	0	0	0	1	0	0	1	1.44254	0.409409	-1.28838	0	0	0	0	1	0
TGME49_219485	0	0	5	6.55556	0.132353	0	0	5	5	0.166667	0.332575	0	0	3	9.88827	0.091842	0	0	4	5.77017	0.147707	0.68551	0	0	2	3.79421	0.208585	1.18341
TGME49_219500	0	0	10	13.1111	0.0708661	0	0	22	22	0.0434783	-0.704802	0	0	6	19.7765	0.0481312	0	0	10	14.4254	0.064828	0.429645	0	0	5	9.48553	0.0953695	0.986555
TGME49_219510	0	0	13	17.0444	0.0554187	0	0	15	15	0.0625	0.173483	0	0	5	16.4804	0.0572068	2	2.88509	9	12.9829	0.277846	2.28003	0	0	9	17.074	0.0553282	-0.0481702
TGME49_219520	0	0	51	66.8667	0.0147348	0	0	83	83	0.0119048	-0.307686	0	0	16	52.7374	0.018609	2	2.88509	58	83.6675	0.0458864	1.30207	0	0	36	68.2958	0.0144309	-0.366841
TGME49_219530	0	0	9	11.8	0.078125	0	0	8	8	0.111111	0.508147	0	0	2	6.59218	0.131714	1	1.44254	12	17.3105	0.133396	0.0182975	0	0	7	13.2797	0.0700293	-0.911384
TGME49_219540	0	0	78	102.267	0.00968367	0	0	71	71	0.0138889	0.520306	0	0	24	79.1061	0.0124834	0	0	62	89.4377	0.0110573	-0.175011	0	0	57	108.135	0.00916296	-0.44613
TGME49_219550	0	0	41	53.7556	0.018263	1	1	43	43	0.0454545	1.3155	0	0	18	59.3296	0.0165756	1	1.44254	32	46.1614	0.0517912	1.64364	0	0	28	53.119	0.0184778	0.156732
TGME49_219560	0	0	0	0	1	0	0	0	0	1	0	0	0	0	0	1	0	0	0	0	1	0	0	0	0	0	1	0
TGME49_219570	0	0	1	1.31111	0.432692	1	1	1	1	1	1.20859	0	0	0	0	1	1	1.44254	2	2.88509	0.628697	-0.669563	0	0	0	0	1	0
TGME49_219580	0	0	0	0	1	0	0	0	0	1	0	0	0	0	0	1	0	0	0	0	1	0	0	0	0	0	1	0
TGME49_219590	0	0	29	38.0222	0.0256264	0	0	35	35	0.0277778	0.116299	0	0	9	29.6648	0.0326107	0	0	36	51.9315	0.0188923	-0.787544	0	0	23	43.6334	0.0224047	-0.541541
TGME49_219600	0	0	10	13.1111	0.0708661	0	0	12	12	0.0769231	0.11832	0	0	4	13.1844	0.0705002	0	0	11	15.868	0.059284	-0.249986	0	0	6	11.3826	0.0807582	0.195982
TGME49_219610	0	0	0	0	1	0	0	1	1	0.5	-1	0	0	0	0	1	0	0	2	2.88509	0.257395	-1.95795	0	0	0	0	1	0
TGME49_219620	0	0	6	7.86667	0.112782	0	0	1	1	0.5	2.14839	0	0	1	3.29609	0.23277	0	0	4	5.77017	0.147707	-0.656168	0	0	5	9.48553	0.0953695	-1.2873
TGME49_219630	0	0	25	32.7778	0.0296053	0	0	37	37	0.0263158	-0.169925	0	0	11	36.257	0.0268406	0	0	30	43.2763	0.0225855	-0.249023	0	0	18	34.1479	0.0284512	0.084072
TGME49_219640	0	0	6	7.86667	0.112782	0	0	5	5	0.166667	0.563429	0	0	1	3.29609	0.23277	0	0	1	1.44254	0.409409	0.81464	0	0	4	7.58842	0.116436	-0.999369
TGME49_219650	0	0	9	11.8	0.078125	0	0	5	5	0.166667	1.09311	0	0	2	6.59218	0.131714	0	0	3	4.32763	0.187701	0.511021	0	0	6	11.3826	0.0807582	-0.705733
TGME49_219660	0	0	0	0	1	0	0	0	0	1	0	0	0	0	0	1	0	0	0	0	1	0	0	0	0	0	1	0
TGME49_219670	0	0	0	0	1	0	0	0	0	1	0	0	0	0	0	1	0	0	0	0	1	0	0	0	0	0	1	0
TGME49_219678	0	0	1	1.31111	0.432692	0	0	8	8	0.111111	-1.96134	0	0	0	0	1	0	0	1	1.44254	0.409409	-1.28838	0	0	0	0	1	0
TGME49_219682	0	0	12	15.7333	0.059761	0	0	12	12	0.0769231	0.364213	0	0	8	26.3687	0.0365381	0	0	6	8.65526	0.103571	1.50314	0	0	9	17.074	0.0553282	0.598615
TGME49_219690	0	0	534	700.133	0.00142626	0	0	718	718	0.00139082	-0.0363029	0	0	200	659.218	0.00151465	0	0	544	784.743	0.00127268	-0.251116	0	0	351	665.884	0.00149951	-0.0144942
TGME49_219700	0	0	57	74.7333	0.0132042	0	0	67	67	0.0147059	0.155394	0	0	23	75.8101	0.0130191	0	0	49	70.6846	0.01395	0.099632	0	0	38	72.09	0.0136818	0.0716205
TGME49_219710	0	0	20	26.2222	0.0367347	0	0	25	25	0.0384615	0.0662732	0	0	8	26.3687	0.0365381	0	0	23	33.1785	0.0292582	-0.320561	0	0	14	26.5595	0.0362851	-0.0100213
TGME49_219720	0	0	18	23.6	0.0406504	2	2	37	37	0.0789474	0.957621	0	0	6	19.7765	0.0481312	6	8.65526	28	40.3912	0.233268	2.27695	0	0	11	20.8682	0.0457286	-0.0738772
TGME49_219730	0	0	97	127.178	0.00780166	2	2	115	115	0.0258621	1.72898	0	0	37	121.955	0.00813304	6	8.65526	76	109.633	0.0872726	3.42366	0	0	64	121.415	0.00816895	0.00635612
TGME49_219738	0	0	3	3.93333	0.202703	0	0	5	5	0.166667	-0.2824	0	0	0	0	1	0	0	4	5.77017	0.147707	-2.75919	0	0	2	3.79421	0.208585	-2.26129
TGME49_219742	0	0	0	0	1	0	0	1	1	0.5	-1	0	0	0	0	1	0	0	0	0	1	0	0	0	0	0	1	0
TGME49_219750	0	0	347	454.956	0.0021932	1	1	550	550	0.00362976	0.726841	0	0	128	421.899	0.00236463	1	1.44254	397	572.689	0.0042576	0.848428	0	0	239	453.408	0.00220066	-0.103675
TGME49_219760	0	0	11	14.4222	0.0648415	1	1	12	12	0.153846	1.2465	0	0	7	23.0726	0.041541	1	1.44254	21	30.2934	0.078053	0.909919	0	0	6	11.3826	0.0807582	0.959075
TGME49_219770	0	0	5	6.55556	0.132353	0	0	7	7	0.125	-0.0824622	0	0	2	6.59218	0.131714	0	0	11	15.868	0.059284	-1.1517	0	0	4	7.58842	0.116436	-0.17788
TGME49_219780	0	0	0	0	1	0	0	0	0	1	0	0	0	0	0	1	0	0	0	0	1	0	0	0	0	0	1	0
TGME49_219790	0	0	14	18.3556	0.0516648	0	0	18	18	0.0526316	0.0267483	0	0	6	19.7765	0.0481312	0	0	23	33.1785	0.0292582	-0.718133	0	0	9	17.074	0.0553282	0.201043
TGME49_219800	0	0	60	78.6667	0.0125523	0	0	58	58	0.0169492	0.433261	0	0	14	46.1453	0.021211	0	0	29	41.8337	0.0233461	0.138365	0	0	41	77.7814	0.0126934	-0.740742
TGME49_219810	0	0	47	61.6222	0.0159688	0	0	81	81	0.0121951	-0.388949	0	0	24	79.1061	0.0124834	0	0	40	57.7017	0.0170353	0.44851	0	0	32	60.7074	0.0162055	0.37647
TGME49_219820	0	0	306	401.2	0.00248633	0	0	343	343	0.00290698	0.225505	0	0	148	487.821	0.00204574	0	0	310	447.188	0.00223121	0.125202	0	0	206	390.804	0.0025523	0.319175
TGME49_219828	0	0	0	0	1	0	0	0	0	1	0	0	0	0	0	1	0	0	2	2.88509	0.257395	-1.95795	0	0	0	0	1	0
TGME49_219832	0	0	11	14.4222	0.0648415	0	0	19	19	0.05	-0.374989	0	0	1	3.29609	0.23277	0	0	7	10.0978	0.090108	-1.36918	0	0	8	15.1768	0.0618167	-1.91283
TGME49_219840	0	0	0	0	1	0	0	0	0	1	0	0	0	0	0	1	0	0	0	0	1	0	0	0	0	0	1	0
TGME49_219850	0	0	47	61.6222	0.0159688	0	0	75	75	0.0131579	-0.279325	0	0	32	105.475	0.00939189	0	0	65	93.7653	0.0105524	0.168082	0	0	36	68.2958	0.0144309	0.619673
TGME49_219860	0	0	47	61.6222	0.0159688	0	0	60	60	0.0163934	0.0378655	0	0	14	46.1453	0.021211	0	0	45	64.9144	0.0151712	-0.483482	0	0	31	58.8103	0.0167195	-0.343281
TGME49_220025	0	0	0	0	1	0	0	2	2	0.333333	-1.58496	0	0	0	0	1	0	0	0	0	1	0	0	0	0	0	1	0
TGME49_220060	0	0	0	0	1	0	0	0	0	1	0	0	0	0	0	1	0	0	0	0	1	0	0	0	0	0	1	0
TGME49_220070	0	0	0	0	1	1	1	2	2	0.666667	-0.584963	0	0	0	0	1	1	1.44254	0	0	2.44254	1.28838	0	0	0	0	1	0
TGME49_220080	0	0	0	0	1	1	1	2	2	0.666667	-0.584963	0	0	0	0	1	1	1.44254	0	0	2.44254	1.28838	0	0	0	0	1	0
TGME49_220090	0	0	13	17.0444	0.0554187	0	0	15	15	0.0625	0.173483	0	0	6	19.7765	0.0481312	0	0	16	23.0807	0.0415271	-0.212921	0	0	7	13.2797	0.0700293	0.540985
TGME49_220100	0	0	53	69.4889	0.0141866	0	0	55	55	0.0178571	0.331969	0	0	16	52.7374	0.018609	0	0	43	62.0293	0.0158656	-0.230096	0	0	37	70.1929	0.0140463	-0.405807
TGME49_220110	0	0	3	3.93333	0.202703	0	0	3	3	0.25	0.302563	0	0	0	0	1	0	0	0	0	1	0	0	0	2	3.79421	0.208585	-2.26129
TGME49_220120	0	0	11	14.4222	0.0648415	0	0	11	11	0.0833333	0.361976	0	0	5	16.4804	0.0572068	0	0	4	5.77017	0.147707	1.36848	0	0	6	11.3826	0.0807582	0.497424
TGME49_220125	0	0	0	0	1	0	0	0	0	1	0	0	0	0	0	1	0	0	0	0	1	0	0	0	0	0	1	0
TGME49_220128	0	0	0	0	1	0	0	0	0	1	0	0	0	0	0	1	0	0	0	0	1	0	0	0	0	0	1	0
TGME49_220132	0	0	0	0	1	0	0	0	0	1	0	0	0	0	0	1	0	0	0	0	1	0	0	0	0	0	1	0
TGME49_220140	0	0	8	10.4889	0.0870406	0	0	8	8	0.111111	0.352242	0	0	2	6.59218	0.131714	0	0	6	8.65526	0.103571	-0.346801	0	0	6	11.3826	0.0807582	-0.705733
TGME49_220145	0	0	0	0	1	0	0	0	0	1	0	0	0	0	0	1	0	0	1	1.44254	0.409409	-1.28838	0	0	0	0	1	0
TGME49_220150	0	0	14	18.3556	0.0516648	0	0	17	17	0.0555556	0.104751	0	0	3	9.88827	0.091842	0	0	12	17.3105	0.0546134	-0.749898	0	0	10	18.9711	0.0500725	-0.875136
TGME49_220160	0	0	2	2.62222	0.276074	0	0	0	0	1	1.85688	0	0	0	0	1	0	0	5	7.21271	0.121762	-3.03786	0	0	2	3.79421	0.208585	-2.26129
TGME49_220170	0	0	4	5.24444	0.160142	0	0	9	9	0.1	-0.679355	0	0	8	26.3687	0.0365381	0	0	9	12.9829	0.071516	0.968866	0	0	0	0	1	4.77446
TGME49_220175	0	0	0	0	1	0	0	0	0	1	0	0	0	0	0	1	0	0	1	1.44254	0.409409	-1.28838	0	0	0	0	1	0
TGME49_220180	2	2.62222	2	2.62222	1	2	2	2	2	1	0	3	9.88827	2	6.59218	1.43414	2	2.88509	0	0	3.88509	1.43776	2	3.79421	1	1.89711	1.65483	0.206493
TGME49_220190	2	2.62222	2	2.62222	1	2	2	2	2	1	0	3	9.88827	2	6.59218	1.43414	2	2.88509	0	0	3.88509	1.43776	2	3.79421	1	1.89711	1.65483	0.206493
TGME49_220200	0	0	4	5.24444	0.160142	0	0	5	5	0.166667	0.0576107	0	0	1	3.29609	0.23277	0	0	3	4.32763	0.187701	-0.310469	0	0	1	1.89711	0.345172	0.568411
TGME49_220208	0	0	2	2.62222	0.276074	0	0	3	3	0.25	-0.143125	0	0	0	0	1	0	0	2	2.88509	0.257395	-1.95795	0	0	2	3.79421	0.208585	-2.26129
TGME49_220212	0	0	0	0	1	0	0	3	3	0.25	-2	0	0	2	6.59218	0.131714	0	0	2	2.88509	0.257395	0.966568	0	0	0	0	1	2.92451
TGME49_220230	0	0	2	2.62222	0.276074	0	0	18	18	0.0526316	-2.39105	0	0	3	9.88827	0.091842	0	0	11	15.868	0.059284	-0.631512	0	0	2	3.79421	0.208585	1.18341
TGME49_220240	0	0	234	306.8	0.00324886	0	0	342	342	0.00291545	-0.156215	0	0	75	247.207	0.0040289	0	0	252	363.521	0.00274333	-0.554459	0	0	155	294.051	0.00338924	-0.249424
TGME49_220250	0	0	31	40.6444	0.0240128	0	0	55	55	0.0178571	-0.427303	0	0	17	56.0335	0.0175335	0	0	24	34.621	0.0280733	0.679081	0	0	20	37.9421	0.0256791	0.550479
TGME49_220260	0	0	4	5.24444	0.160142	0	0	9	9	0.1	-0.679355	0	0	2	6.59218	0.131714	0	0	6	8.65526	0.103571	-0.346801	0	0	4	7.58842	0.116436	-0.17788
TGME49_220270	0	0	262	343.511	0.00290266	0	0	359	359	0.00277778	-0.0634464	0	0	93	306.536	0.00325165	0	0	235	338.998	0.0029412	-0.144768	0	0	162	307.331	0.00324327	-0.00372407
TGME49_220280	0	0	1	1.31111	0.432692	0	0	0	0	1	1.20859	0	0	0	0	1	0	0	4	5.77017	0.147707	-2.75919	0	0	0	0	1	0
TGME49_220290	0	0	0	0	1	0	0	0	0	1	0	0	0	1	3.29609	0.23277	0	0	0	0	1	2.10302	0	0	0	0	1	2.10302
TGME49_220300	0	0	2	2.62222	0.276074	0	0	0	0	1	1.85688	0	0	0	0	1	0	0	0	0	1	0	0	0	2	3.79421	0.208585	-2.26129
TGME49_220310	0	0	0	0	1	0	0	0	0	1	0	0	0	0	0	1	0	0	0	0	1	0	0	0	0	0	1	0
TGME49_220320	0	0	5	6.55556	0.132353	0	0	15	15	0.0625	-1.08246	0	0	0	0	1	0	0	6	8.65526	0.103571	-3.27131	0	0	2	3.79421	0.208585	-2.26129
TGME49_220330	0	0	4	5.24444	0.160142	0	0	15	15	0.0625	-1.35743	0	0	1	3.29609	0.23277	0	0	8	11.5403	0.0797426	-1.54548	0	0	4	7.58842	0.116436	-0.999369
TGME49_220340	0	0	0	0	1	0	0	0	0	1	0	0	0	0	0	1	0	0	1	1.44254	0.409409	-1.28838	0	0	0	0	1	0
TGME49_220350	0	0	30	39.3333	0.0247934	0	0	41	41	0.0238095	-0.0584167	0	0	12	39.5531	0.024659	0	0	10	14.4254	0.064828	1.3945	0	0	22	41.7363	0.0233993	-0.0756519
TGME49_220360	0	0	10	13.1111	0.0708661	0	0	10	10	0.0909091	0.359328	0	0	6	19.7765	0.0481312	0	0	7	10.0978	0.090108	0.904682	0	0	5	9.48553	0.0953695	0.986555
TGME49_220370	0	0	12	15.7333	0.059761	0	0	17	17	0.0555556	-0.105272	0	0	8	26.3687	0.0365381	0	0	4	5.77017	0.147707	2.01526	0	0	7	13.2797	0.0700293	0.938558
TGME49_220380	0	0	14	18.3556	0.0516648	0	0	42	42	0.0232558	-1.15159	0	0	7	23.0726	0.041541	0	0	21	30.2934	0.0319556	-0.378465	0	0	6	11.3826	0.0807582	0.959075
TGME49_220390	0	0	24	31.4667	0.0308008	0	0	34	34	0.0285714	-0.108396	0	0	7	23.0726	0.041541	0	0	13	18.7531	0.0506251	0.285318	0	0	16	30.3537	0.0318942	-0.381242
TGME49_220400	0	0	2642	3463.96	0.000288604	0	0	4109	4109	0.000243309	-0.246302	0	0	971	3200.5	0.000312353	0	0	2950	4255.5	0.000234935	-0.410919	0	0	1790	3395.82	0.000294393	-0.0854355
TGME49_220420	0	0	3	3.93333	0.202703	0	0	9	9	0.1	-1.01937	0	0	0	0	1	0	0	3	4.32763	0.187701	-2.41349	0	0	3	5.69132	0.149447	-2.74229
TGME49_220425	0	0	0	0	1	0	0	0	0	1	0	0	0	0	0	1	0	0	0	0	1	0	0	0	0	0	1	0
TGME49_220430	0	0	7	9.17778	0.0982533	0	0	5	5	0.166667	0.762388	0	0	4	13.1844	0.0705002	0	0	4	5.77017	0.147707	1.06704	0	0	6	11.3826	0.0807582	0.195982
TGME49_220440	0	0	9	11.8	0.078125	0	0	6	6	0.142857	0.870717	0	0	3	9.88827	0.091842	0	0	9	12.9829	0.071516	-0.360888	0	0	8	15.1768	0.0618167	-0.571156
TGME49_220450	0	0	4	5.24444	0.160142	0	0	6	6	0.142857	-0.164782	0	0	0	0	1	0	0	2	2.88509	0.257395	-1.95795	0	0	0	0	1	0
TGME49_220460	0	0	6	7.86667	0.112782	0	0	9	9	0.1	-0.173536	0	0	0	0	1	0	0	5	7.21271	0.121762	-3.03786	0	0	5	9.48553	0.0953695	-3.39033
TGME49_220470	0	0	22	28.8444	0.0335071	0	0	17	17	0.0555556	0.729465	0	0	4	13.1844	0.0705002	0	0	10	14.4254	0.064828	-0.12101	0	0	16	30.3537	0.0318942	-1.14433
TGME49_220480	0	0	10	13.1111	0.0708661	0	0	7	7	0.125	0.81876	0	0	3	9.88827	0.091842	0	0	4	5.77017	0.147707	0.68551	0	0	6	11.3826	0.0807582	-0.185544
TGME49_220490	0	0	5	6.55556	0.132353	0	0	14	14	0.0666667	-0.989353	0	0	3	9.88827	0.091842	0	0	10	14.4254	0.064828	-0.502536	0	0	5	9.48553	0.0953695	0.0543746
TGME49_220500	0	0	21	27.5333	0.0350467	0	0	33	33	0.0294118	-0.252886	0	0	6	19.7765	0.0481312	0	0	27	38.9487	0.0250321	-0.943192	0	0	15	28.4566	0.0339483	-0.503635
TGME49_220510	0	0	15	19.6667	0.0483871	0	0	26	26	0.037037	-0.385654	0	0	5	16.4804	0.0572068	0	0	3	4.32763	0.187701	1.71418	0	0	13	24.6624	0.0389675	-0.553913
TGME49_220520	1	1.31111	1	1.31111	1	1	1	1	1	1	0	2	6.59218	2	6.59218	1	1	1.44254	0	0	2.44254	1.28838	1	1.89711	0	0	2.89711	1.53461
TGME49_220525	1	1.31111	1	1.31111	1	1	1	1	1	1	0	2	6.59218	1	3.29609	1.76723	1	1.44254	1	1.44254	1	-0.82149	1	1.89711	0	0	2.89711	0.713123
TGME49_220530	1	1.31111	14	18.3556	0.119403	1	1	9	9	0.2	0.744161	2	6.59218	5	16.4804	0.434324	1	1.44254	12	17.3105	0.133396	-1.70306	1	1.89711	10	18.9711	0.145065	-1.58207
TGME49_220540	0	0	8	10.4889	0.0870406	0	0	8	8	0.111111	0.352242	0	0	3	9.88827	0.091842	0	0	1	1.44254	0.409409	2.15632	0	0	7	13.2797	0.0700293	-0.391195
TGME49_220550	0	0	0	0	1	0	0	0	0	1	0	0	0	0	0	1	0	0	0	0	1	0	0	0	0	0	1	0
TGME49_220560	0	0	0	0	1	0	0	0	0	1	0	0	0	0	0	1	0	0	1	1.44254	0.409409	-1.28838	0	0	0	0	1	0
TGME49_220570	0	0	10	13.1111	0.0708661	0	0	19	19	0.05	-0.503168	0	0	6	19.7765	0.0481312	0	0	16	23.0807	0.0415271	-0.212921	0	0	9	17.074	0.0553282	0.201043
TGME49_220580	0	0	0	0	1	0	0	0	0	1	0	0	0	0	0	1	0	0	0	0	1	0	0	0	0	0	1	0
TGME49_220585	0	0	0	0	1	0	0	0	0	1	0	0	0	0	0	1	0	0	1	1.44254	0.409409	-1.28838	0	0	0	0	1	0
TGME49_220600	0	0	34	44.5778	0.0219405	0	0	31	31	0.03125	0.510259	0	0	11	36.257	0.0268406	0	0	17	24.5232	0.03918	0.5457	0	0	27	51.2219	0.0191491	-0.487143
TGME49_220610	0	0	22	28.8444	0.0335071	0	0	29	29	0.0333333	-0.0075001	0	0	10	32.9609	0.0294456	0	0	20	28.8509	0.0334999	0.186102	0	0	16	30.3537	0.0318942	0.115239
TGME49_220620	0	0	0	0	1	0	0	0	0	1	0	0	0	0	0	1	0	0	0	0	1	0	0	0	0	0	1	0
TGME49_220630	0	0	74	97.0222	0.0102018	0	0	68	68	0.0144928	0.506512	0	0	24	79.1061	0.0124834	0	0	62	89.4377	0.0110573	-0.175011	0	0	61	115.723	0.00856726	-0.54311
TGME49_220640	1	1.31111	56	73.4222	0.031054	3	3	61	61	0.0645161	1.05488	2	6.59218	33	108.771	0.0691638	7	10.0978	45	64.9144	0.168367	1.28352	1	1.89711	36	68.2958	0.0418078	-0.726245
TGME49_220650	1	1.31111	1	1.31111	1	3	3	2	2	1.33333	0.415037	2	6.59218	1	3.29609	1.76723	7	10.0978	2	2.88509	2.85651	0.692765	1	1.89711	0	0	2.89711	0.713123
TGME49_220720	0	0	7	9.17778	0.0982533	0	0	8	8	0.111111	0.177426	0	0	3	9.88827	0.091842	0	0	14	20.1956	0.0471796	-0.96099	0	0	5	9.48553	0.0953695	0.0543746
TGME49_220730	0	0	0	0	1	0	0	0	0	1	0	0	0	0	0	1	0	0	0	0	1	0	0	0	0	0	1	0
TGME49_220740	0	0	0	0	1	0	0	0	0	1	0	0	0	0	0	1	0	0	1	1.44254	0.409409	-1.28838	0	0	0	0	1	0
TGME49_220840	0	0	0	0	1	0	0	1	1	0.5	-1	0	0	0	0	1	0	0	1	1.44254	0.409409	-1.28838	0	0	0	0	1	0
TGME49_220850	0	0	0	0	1	0	0	0	0	1	0	0	0	0	0	1	0	0	0	0	1	0	0	0	0	0	1	0
TGME49_220860	0	0	24	31.4667	0.0308008	0	0	32	32	0.030303	-0.0235068	0	0	18	59.3296	0.0165756	0	0	24	34.621	0.0280733	0.760137	0	0	17	32.2508	0.0300745	0.859477
TGME49_220870	0	0	18	23.6	0.0406504	0	0	20	20	0.047619	0.228269	0	0	12	39.5531	0.024659	3	4.32763	29	41.8337	0.124379	2.33456	0	0	12	22.7653	0.0420782	0.770956
TGME49_220880	0	0	18	23.6	0.0406504	0	0	15	15	0.0625	0.620586	0	0	10	32.9609	0.0294456	0	0	10	14.4254	0.064828	1.13856	0	0	13	24.6624	0.0389675	0.404219
TGME49_220890	0	0	81	106.2	0.00932836	0	0	137	137	0.00724638	-0.364363	0	0	23	75.8101	0.0130191	3	4.32763	71	102.421	0.0515142	1.98434	0	0	58	110.032	0.0090064	-0.53161
TGME49_220900	0	0	216	283.2	0.00351865	0	0	259	259	0.00384615	0.128395	0	0	87	286.76	0.00347512	0	0	162	233.692	0.0042609	0.294097	0	0	136	258.006	0.00386091	0.151877
TGME49_220910	0	0	4	5.24444	0.160142	0	0	8	8	0.111111	-0.527352	0	0	0	0	1	0	0	5	7.21271	0.121762	-3.03786	0	0	3	5.69132	0.149447	-2.74229
TGME49_220920	0	0	4	5.24444	0.160142	0	0	3	3	0.25	0.642573	0	0	1	3.29609	0.23277	0	0	1	1.44254	0.409409	0.81464	0	0	3	5.69132	0.149447	-0.639266
TGME49_220930	0	0	49	64.2444	0.015327	0	0	59	59	0.0166667	0.120893	0	0	19	62.6257	0.0157169	0	0	40	57.7017	0.0170353	0.116207	0	0	39	73.9871	0.0133356	-0.237034
TGME49_220940	0	0	26	34.0889	0.0284991	0	0	92	92	0.0107527	-1.40622	0	0	18	59.3296	0.0165756	1	1.44254	54	77.8973	0.0309585	0.901274	0	0	16	30.3537	0.0318942	0.944231
TGME49_220950	76	99.6444	1077	1412.07	0.0712241	214	214	2190	2190	0.0981287	0.462309	103	339.497	404	1331.62	0.25551	320	461.614	1086	1566.6	0.295109	0.207872	76	144.18	728	1381.09	0.105044	-1.28239
TGME49_221160	0	0	7	9.17778	0.0982533	0	0	8	8	0.111111	0.177426	0	0	4	13.1844	0.0705002	0	0	9	12.9829	0.071516	0.0206387	0	0	7	13.2797	0.0700293	-0.00966918
TGME49_221170	0	0	20	26.2222	0.0367347	0	0	27	27	0.0357143	-0.040642	0	0	13	42.8492	0.0228055	0	0	32	46.1614	0.0212038	-0.105056	0	0	13	24.6624	0.0389675	0.772894
TGME49_221180	0	0	52	68.1778	0.0144555	0	0	79	79	0.0125	-0.209691	0	0	26	85.6983	0.0115342	0	0	46	66.357	0.0148463	0.364177	0	0	39	73.9871	0.0133356	0.209361
TGME49_221190	0	0	8	10.4889	0.0870406	0	0	11	11	0.0833333	-0.0627951	0	0	1	3.29609	0.23277	0	0	3	4.32763	0.187701	-0.310469	0	0	4	7.58842	0.116436	-0.999369
TGME49_221200	0	0	7	9.17778	0.0982533	0	0	5	5	0.166667	0.762388	0	0	5	16.4804	0.0572068	0	0	5	7.21271	0.121762	1.08981	0	0	7	13.2797	0.0700293	0.291772
TGME49_221210	0	0	1042	1366.18	0.000731434	0	0	1373	1373	0.000727802	-0.00718115	0	0	393	1295.36	0.000771389	0	0	1012	1459.85	0.000684531	-0.172341	0	0	720	1365.92	0.000731574	-0.0764551
TGME49_221220	0	0	3	3.93333	0.202703	0	0	15	15	0.0625	-1.69744	0	0	0	0	1	0	0	4	5.77017	0.147707	-2.75919	0	0	3	5.69132	0.149447	-2.74229
TGME49_221230	0	0	25	32.7778	0.0296053	0	0	31	31	0.03125	0.0780025	0	0	8	26.3687	0.0365381	0	0	18	25.9658	0.0370841	0.0213985	0	0	18	34.1479	0.0284512	-0.360911
TGME49_221240	0	0	0	0	1	0	0	0	0	1	0	0	0	0	0	1	0	0	1	1.44254	0.409409	-1.28838	0	0	0	0	1	0
TGME49_221250	0	0	42	55.0667	0.0178359	0	0	49	49	0.02	0.165215	0	0	16	52.7374	0.018609	0	0	27	38.9487	0.0250321	0.42778	0	0	25	47.4277	0.0206494	0.150096
TGME49_221260	0	0	14	18.3556	0.0516648	0	0	5	5	0.166667	1.68971	0	0	5	16.4804	0.0572068	0	0	9	12.9829	0.071516	0.32208	0	0	6	11.3826	0.0807582	0.497424
TGME49_221265	0	0	0	0	1	0	0	1	1	0.5	-1	0	0	0	0	1	0	0	3	4.32763	0.187701	-2.41349	0	0	0	0	1	0
TGME49_221270	0	0	33	43.2667	0.0225904	0	0	58	58	0.0169492	-0.414494	0	0	19	62.6257	0.0157169	0	0	25	36.0636	0.0269807	0.779608	0	0	22	41.7363	0.0233993	0.574146
TGME49_221275	0	0	0	0	1	0	0	0	0	1	0	0	0	0	0	1	0	0	0	0	1	0	0	0	0	0	1	0
TGME49_221280	0	0	11	14.4222	0.0648415	0	0	21	21	0.0454545	-0.512493	0	0	1	3.29609	0.23277	0	0	7	10.0978	0.090108	-1.36918	0	0	10	18.9711	0.0500725	-2.21682
TGME49_221290	0	0	0	0	1	0	0	0	0	1	0	0	0	0	0	1	0	0	0	0	1	0	0	0	0	0	1	0
TGME49_221295	0	0	51	66.8667	0.0147348	0	0	46	46	0.0212766	0.530042	0	0	18	59.3296	0.0165756	0	0	29	41.8337	0.0233461	0.494119	0	0	35	66.3987	0.0148371	-0.159855
TGME49_221310	0	0	5	6.55556	0.132353	0	0	12	12	0.0769231	-0.782902	0	0	2	6.59218	0.131714	0	0	5	7.21271	0.121762	-0.113345	0	0	3	5.69132	0.149447	0.182223
TGME49_221320	0	0	39	51.1333	0.0191816	0	0	33	33	0.0294118	0.616671	0	0	17	56.0335	0.0175335	0	0	17	24.5232	0.03918	1.16	0	0	28	53.119	0.0184778	0.0756757
TGME49_221330	0	0	27	35.4	0.0274725	0	0	18	18	0.0526316	0.937939	0	0	9	29.6648	0.0326107	0	0	13	18.7531	0.0506251	0.634508	0	0	16	30.3537	0.0318942	-0.0320518
TGME49_221340	0	0	9	11.8	0.078125	0	0	11	11	0.0833333	0.0931094	0	0	4	13.1844	0.0705002	0	0	5	7.21271	0.121762	0.78837	0	0	7	13.2797	0.0700293	-0.00966918
TGME49_221350	0	0	7	9.17778	0.0982533	0	0	16	16	0.0588235	-0.740112	0	0	1	3.29609	0.23277	0	0	10	14.4254	0.064828	-1.84421	0	0	7	13.2797	0.0700293	-1.73287
TGME49_221360	0	0	16	20.9778	0.0455005	0	0	17	17	0.0555556	0.288049	0	0	4	13.1844	0.0705002	0	0	9	12.9829	0.071516	0.0206387	0	0	12	22.7653	0.0420782	-0.744554
TGME49_221370	0	0	7	9.17778	0.0982533	0	0	9	9	0.1	0.0254226	0	0	4	13.1844	0.0705002	0	0	2	2.88509	0.257395	1.86828	0	0	4	7.58842	0.116436	0.723835
TGME49_221380	0	0	171	224.2	0.0044405	0	0	147	147	0.00675676	0.60561	0	0	67	220.838	0.00450779	0	0	148	213.496	0.00466208	0.0485535	0	0	113	214.373	0.00464311	0.0426691
TGME49_221390	0	0	17	22.2889	0.0429389	0	0	18	18	0.0526316	0.293642	0	0	7	23.0726	0.041541	0	0	9	12.9829	0.071516	0.783731	0	0	12	22.7653	0.0420782	0.0185385
TGME49_221400	0	0	33	43.2667	0.0225904	0	0	26	26	0.037037	0.713261	0	0	11	36.257	0.0268406	0	0	18	25.9658	0.0370841	0.466382	0	0	25	47.4277	0.0206494	-0.37832
TGME49_221410	0	0	23	30.1556	0.032097	1	1	29	29	0.0666667	1.05453	0	0	9	29.6648	0.0326107	2	2.88509	18	25.9658	0.144075	2.1434	0	0	16	30.3537	0.0318942	-0.0320518
TGME49_221415	0	0	0	0	1	1	1	3	3	0.5	-1	0	0	0	0	1	2	2.88509	3	4.32763	0.729234	-0.455547	0	0	0	0	1	0
TGME49_221420	0	0	0	0	1	0	0	0	0	1	0	0	0	0	0	1	1	1.44254	3	4.32763	0.458467	-1.12511	0	0	0	0	1	0
TGME49_221430	0	0	2	2.62222	0.276074	0	0	2	2	0.333333	0.271913	0	0	0	0	1	0	0	3	4.32763	0.187701	-2.41349	0	0	2	3.79421	0.208585	-2.26129
TGME49_221440	0	0	11	14.4222	0.0648415	0	0	8	8	0.111111	0.777014	0	0	3	9.88827	0.091842	0	0	3	4.32763	0.187701	1.03121	0	0	7	13.2797	0.0700293	-0.391195
TGME49_221450	0	0	12	15.7333	0.059761	0	0	4	4	0.2	1.74272	0	0	0	0	1	0	0	5	7.21271	0.121762	-3.03786	0	0	10	18.9711	0.0500725	-4.31984
TGME49_221455	0	0	0	0	1	0	0	0	0	1	0	0	0	0	0	1	0	0	0	0	1	0	0	0	0	0	1	0
TGME49_221460	0	0	28	36.7111	0.0265174	0	0	34	34	0.0285714	0.107635	0	0	15	49.4413	0.019825	1	1.44254	25	36.0636	0.0659014	1.73299	0	0	20	37.9421	0.0256791	0.373275
TGME49_221470	0	0	100	131.111	0.00756939	0	0	112	112	0.00884956	0.225429	0	0	36	118.659	0.00835707	1	1.44254	82	118.289	0.0204759	1.29286	0	0	69	130.9	0.00758148	-0.140517
TGME49_221480	0	0	49	64.2444	0.015327	0	0	110	110	0.00900901	-0.766633	0	0	31	102.179	0.00969192	0	0	52	75.0122	0.0131558	0.440843	0	0	36	68.2958	0.0144309	0.574306
TGME49_221490	0	0	19	24.9111	0.0385935	0	0	15	15	0.0625	0.695499	0	0	5	16.4804	0.0572068	0	0	13	18.7531	0.0506251	-0.176334	0	0	13	24.6624	0.0389675	-0.553913
TGME49_221500	0	0	3	3.93333	0.202703	0	0	9	9	0.1	-1.01937	0	0	2	6.59218	0.131714	0	0	2	2.88509	0.257395	0.966568	0	0	2	3.79421	0.208585	0.66322
TGME49_221510	0	0	158	207.156	0.0048041	0	0	235	235	0.00423729	-0.181125	0	0	49	161.508	0.00615353	1	1.44254	194	279.853	0.00869686	0.499081	0	0	102	193.505	0.00514126	-0.259292
TGME49_221518	5	6.55556	11	14.4222	0.489914	8	8	10	10	0.818182	0.739894	6	19.7765	2	6.59218	2.73657	18	25.9658	16	23.0807	1.11981	-1.28912	5	9.48553	7	13.2797	0.734294	-1.89794
TGME49_221522	5	6.55556	28	36.7111	0.200354	8	8	33	33	0.264706	0.401842	6	19.7765	13	42.8492	0.473818	18	25.9658	23	33.1785	0.788969	0.735635	5	9.48553	16	30.3537	0.334427	-0.502642
TGME49_221530	0	0	29	38.0222	0.0256264	0	0	31	31	0.03125	0.286224	0	0	14	46.1453	0.021211	0	0	37	53.3741	0.0183911	-0.205807	0	0	21	39.8392	0.0244863	0.207157
TGME49_221540	0	0	1	1.31111	0.432692	0	0	7	7	0.125	-1.79141	0	0	2	6.59218	0.131714	0	0	9	12.9829	0.071516	-0.881076	0	0	1	1.89711	0.345172	1.3899
TGME49_221550	0	0	0	0	1	0	0	0	0	1	0	0	0	0	0	1	0	0	0	0	1	0	0	0	0	0	1	0
TGME49_221560	0	0	0	0	1	0	0	0	0	1	0	0	0	0	0	1	1	1.44254	1	1.44254	1	0	0	0	0	0	1	0
TGME49_221570	0	0	6	7.86667	0.112782	0	0	9	9	0.1	-0.173536	0	0	2	6.59218	0.131714	1	1.44254	7	10.0978	0.220093	0.740696	0	0	5	9.48553	0.0953695	-0.465814
TGME49_221580	0	0	9	11.8	0.078125	1	1	13	13	0.142857	0.870717	0	0	5	16.4804	0.0572068	1	1.44254	12	17.3105	0.133396	1.22145	0	0	6	11.3826	0.0807582	0.497424
TGME49_221585	0	0	0	0	1	0	0	3	3	0.25	-2	0	0	0	0	1	0	0	1	1.44254	0.409409	-1.28838	0	0	0	0	1	0
TGME49_221590	0	0	125	163.889	0.00606469	1	1	238	238	0.0083682	0.464484	0	0	53	174.693	0.00569175	1	1.44254	138	199.071	0.0122084	1.10093	0	0	78	147.974	0.00671257	0.237991
TGME49_221600	0	0	12	15.7333	0.059761	0	0	4	4	0.2	1.74272	0	0	1	3.29609	0.23277	0	0	4	5.77017	0.147707	-0.656168	0	0	5	9.48553	0.0953695	-1.2873
TGME49_221610	0	0	21	27.5333	0.0350467	0	0	21	21	0.0454545	0.375145	0	0	10	32.9609	0.0294456	0	0	8	11.5403	0.0797426	1.4373	0	0	10	18.9711	0.0500725	0.765963
TGME49_221620	0	0	583	764.378	0.00130654	0	0	677	677	0.00147493	0.174887	0	0	196	646.034	0.00154551	0	0	662	954.963	0.00104607	-0.563115	0	0	408	774.019	0.00129029	-0.260392
TGME49_221630	0	0	8	10.4889	0.0870406	0	0	3	3	0.25	1.52217	0	0	2	6.59218	0.131714	0	0	5	7.21271	0.121762	-0.113345	0	0	8	15.1768	0.0618167	-1.09134
TGME49_221640	0	0	7	9.17778	0.0982533	0	0	20	20	0.047619	-1.04497	0	0	3	9.88827	0.091842	0	0	7	10.0978	0.090108	-0.0274991	0	0	5	9.48553	0.0953695	0.0543746
TGME49_221660	0	0	15	19.6667	0.0483871	0	0	8	8	0.111111	1.19931	0	0	7	23.0726	0.041541	0	0	9	12.9829	0.071516	0.783731	0	0	12	22.7653	0.0420782	0.0185385
TGME49_221665	0	0	0	0	1	0	0	0	0	1	0	0	0	0	0	1	0	0	0	0	1	0	0	0	0	0	1	0
TGME49_221670	0	0	26	34.0889	0.0284991	0	0	37	37	0.0263158	-0.114985	0	0	12	39.5531	0.024659	0	0	26	37.5061	0.0259699	0.0747238	0	0	20	37.9421	0.0256791	0.0584797
TGME49_221675	0	0	13	17.0444	0.0554187	0	0	11	11	0.0833333	0.58852	0	0	6	19.7765	0.0481312	0	0	8	11.5403	0.0797426	0.728378	0	0	6	11.3826	0.0807582	0.746637
TGME49_221685	0	0	0	0	1	0	0	11	11	0.0833333	-3.58496	0	0	0	0	1	0	0	2	2.88509	0.257395	-1.95795	0	0	0	0	1	0
TGME49_221690	0	0	15	19.6667	0.0483871	0	0	7	7	0.125	1.36923	0	0	8	26.3687	0.0365381	0	0	5	7.21271	0.121762	1.7366	0	0	10	18.9711	0.0500725	0.454617
TGME49_221700	0	0	6	7.86667	0.112782	0	0	10	10	0.0909091	-0.31104	0	0	0	0	1	0	0	8	11.5403	0.0797426	-3.6485	0	0	4	7.58842	0.116436	-3.10239
TGME49_221710	0	0	7	9.17778	0.0982533	0	0	5	5	0.166667	0.762388	0	0	1	3.29609	0.23277	0	0	1	1.44254	0.409409	0.81464	0	0	4	7.58842	0.116436	-0.999369
TGME49_221720	0	0	10	13.1111	0.0708661	0	0	9	9	0.1	0.496832	0	0	7	23.0726	0.041541	0	0	2	2.88509	0.257395	2.63138	0	0	6	11.3826	0.0807582	0.959075
TGME49_221818	0	0	3	3.93333	0.202703	0	0	3	3	0.25	0.302563	0	0	3	9.88827	0.091842	0	0	2	2.88509	0.257395	1.48676	0	0	3	5.69132	0.149447	0.702412
TGME49_221830	0	0	0	0	1	0	0	0	0	1	0	0	0	0	0	1	0	0	1	1.44254	0.409409	-1.28838	0	0	0	0	1	0
TGME49_221840	0	0	0	0	1	0	0	0	0	1	0	0	0	0	0	1	0	0	0	0	1	0	0	0	0	0	1	0
TGME49_221850	0	0	6	7.86667	0.112782	1	1	9	9	0.2	0.826464	0	0	1	3.29609	0.23277	1	1.44254	1	1.44254	1	2.10302	0	0	2	3.79421	0.208585	-0.15827
TGME49_221855	0	0	0	0	1	1	1	1	1	1	0	0	0	0	0	1	1	1.44254	0	0	2.44254	1.28838	0	0	0	0	1	0
TGME49_221860	0	0	0	0	1	1	1	1	1	1	0	0	0	0	0	1	1	1.44254	0	0	2.44254	1.28838	0	0	0	0	1	0
TGME49_221865	0	0	1	1.31111	0.432692	1	1	4	4	0.4	-0.113341	0	0	0	0	1	1	1.44254	0	0	2.44254	1.28838	0	0	1	1.89711	0.345172	-1.53461
TGME49_221870	0	0	21	27.5333	0.0350467	0	0	16	16	0.0588235	0.747114	0	0	10	32.9609	0.0294456	0	0	10	14.4254	0.064828	1.13856	0	0	12	22.7653	0.0420782	0.515019
TGME49_221880	0	0	0	0	1	0	0	0	0	1	0	0	0	0	0	1	0	0	1	1.44254	0.409409	-1.28838	0	0	0	0	1	0
TGME49_221890	0	0	1	1.31111	0.432692	0	0	0	0	1	1.20859	0	0	0	0	1	0	0	0	0	1	0	0	0	1	1.89711	0.345172	-1.53461
TGME49_221895	0	0	1	1.31111	0.432692	0	0	0	0	1	1.20859	0	0	0	0	1	0	0	0	0	1	0	0	0	1	1.89711	0.345172	-1.53461
TGME49_221900	0	0	6	7.86667	0.112782	0	0	24	24	0.04	-1.49546	0	0	3	9.88827	0.091842	0	0	10	14.4254	0.064828	-0.502536	0	0	4	7.58842	0.116436	0.342309
TGME49_221905	14	18.3556	18	23.6	0.786811	13	13	17	17	0.777778	-0.0166595	15	49.4413	2	6.59218	6.64386	24	34.621	14	20.1956	1.68059	-1.98306	14	26.5595	13	24.6624	1.07393	-2.62913
TGME49_221910	14	18.3556	28	36.7111	0.513259	13	13	37	37	0.368421	-0.478331	15	49.4413	7	23.0726	2.09538	25	36.0636	23	33.1785	1.08441	-0.9503	14	26.5595	18	34.1479	0.7841	-1.4181
TGME49_221922	0	0	9	11.8	0.078125	0	0	33	33	0.0294118	-1.40939	0	0	1	3.29609	0.23277	2	2.88509	32	46.1614	0.0823786	-1.49856	0	0	8	15.1768	0.0618167	-1.91283
TGME49_221930	0	0	0	0	1	0	0	0	0	1	0	0	0	0	0	1	0	0	2	2.88509	0.257395	-1.95795	0	0	0	0	1	0
TGME49_221940	0	0	15	19.6667	0.0483871	0	0	12	12	0.0769231	0.668794	0	0	11	36.257	0.0268406	0	0	11	15.868	0.059284	1.14322	0	0	10	18.9711	0.0500725	0.8996
TGME49_221950	0	0	15	19.6667	0.0483871	0	0	20	20	0.047619	-0.0230836	0	0	5	16.4804	0.0572068	0	0	13	18.7531	0.0506251	-0.176334	0	0	11	20.8682	0.0457286	-0.32309
TGME49_221970	0	0	4	5.24444	0.160142	0	0	19	19	0.05	-1.67935	0	0	1	3.29609	0.23277	0	0	14	20.1956	0.0471796	-2.30267	0	0	3	5.69132	0.149447	-0.639266
TGME49_221980	0	0	4	5.24444	0.160142	0	0	12	12	0.0769231	-1.05787	0	0	2	6.59218	0.131714	0	0	1	1.44254	0.409409	1.63613	0	0	2	3.79421	0.208585	0.66322
TGME49_221990	0	0	37	48.5111	0.0201975	0	0	46	46	0.0212766	0.0750916	0	0	16	52.7374	0.018609	0	0	24	34.621	0.0280733	0.593198	0	0	26	49.3248	0.0198709	0.094659
TGME49_222000	0	0	19	24.9111	0.0385935	1	1	15	15	0.125	1.6955	0	0	8	26.3687	0.0365381	1	1.44254	13	18.7531	0.123654	1.75884	0	0	15	28.4566	0.0339483	-0.106063
TGME49_222010	0	0	11	14.4222	0.0648415	1	1	6	6	0.285714	2.13958	0	0	2	6.59218	0.131714	1	1.44254	5	7.21271	0.29741	1.17504	0	0	8	15.1768	0.0618167	-1.09134
TGME49_222020	0	0	32	41.9556	0.0232799	0	0	32	32	0.030303	0.380379	0	0	12	39.5531	0.024659	0	0	20	28.8509	0.0334999	0.442039	0	0	19	36.045	0.0269942	0.130532
TGME49_222030	0	0	8	10.4889	0.0870406	0	0	9	9	0.1	0.200239	0	0	8	26.3687	0.0365381	0	0	0	0	1	4.77446	0	0	8	15.1768	0.0618167	0.758597
TGME49_222040	0	0	15	19.6667	0.0483871	0	0	24	24	0.04	-0.274622	0	0	8	26.3687	0.0365381	0	0	12	17.3105	0.0546134	0.579855	0	0	9	17.074	0.0553282	0.598615
TGME49_222050	0	0	26	34.0889	0.0284991	0	0	32	32	0.030303	0.0885482	0	0	7	23.0726	0.041541	0	0	11	15.868	0.059284	0.513107	0	0	15	28.4566	0.0339483	-0.291197
TGME49_222060	0	0	2	2.62222	0.276074	0	0	4	4	0.2	-0.465053	0	0	1	3.29609	0.23277	0	0	6	8.65526	0.103571	-1.16829	0	0	2	3.79421	0.208585	-0.15827
TGME49_222070	0	0	2	2.62222	0.276074	0	0	2	2	0.333333	0.271913	0	0	3	9.88827	0.091842	0	0	2	2.88509	0.257395	1.48676	0	0	1	1.89711	0.345172	1.91009
TGME49_222075	0	0	0	0	1	0	0	1	1	0.5	-1	0	0	0	0	1	0	0	0	0	1	0	0	0	0	0	1	0
TGME49_222080	0	0	0	0	1	0	0	4	4	0.2	-2.32193	0	0	0	0	1	0	0	1	1.44254	0.409409	-1.28838	0	0	0	0	1	0
TGME49_222090	0	0	38	49.8222	0.0196764	0	0	32	32	0.030303	0.622993	0	0	10	32.9609	0.0294456	0	0	30	43.2763	0.0225855	-0.38266	0	0	28	53.119	0.0184778	-0.67226
TGME49_222100	0	0	17	22.2889	0.0429389	0	0	19	19	0.05	0.219642	0	0	7	23.0726	0.041541	0	0	19	27.4083	0.035201	-0.23892	0	0	11	20.8682	0.0457286	0.138561
TGME49_222110	0	0	30	39.3333	0.0247934	0	0	50	50	0.0196078	-0.338525	0	0	9	29.6648	0.0326107	0	0	29	41.8337	0.0233461	-0.482164	0	0	19	36.045	0.0269942	-0.272696
TGME49_222120	0	0	2	2.62222	0.276074	0	0	12	12	0.0769231	-1.84356	0	0	3	9.88827	0.091842	0	0	5	7.21271	0.121762	0.406844	0	0	2	3.79421	0.208585	1.18341
TGME49_222130	0	0	6	7.86667	0.112782	0	0	12	12	0.0769231	-0.552048	0	0	3	9.88827	0.091842	0	0	10	14.4254	0.064828	-0.502536	0	0	3	5.69132	0.149447	0.702412
TGME49_222140	0	0	8	10.4889	0.0870406	0	0	5	5	0.166667	0.937205	0	0	6	19.7765	0.0481312	0	0	5	7.21271	0.121762	1.33902	0	0	7	13.2797	0.0700293	0.540985
TGME49_222150	0	0	0	0	1	0	0	0	0	1	0	0	0	0	0	1	0	0	0	0	1	0	0	0	0	0	1	0
TGME49_222155	0	0	2	2.62222	0.276074	0	0	4	4	0.2	-0.465053	0	0	0	0	1	0	0	3	4.32763	0.187701	-2.41349	0	0	2	3.79421	0.208585	-2.26129
TGME49_222160	0	0	29	38.0222	0.0256264	0	0	34	34	0.0285714	0.156941	0	0	5	16.4804	0.0572068	0	0	26	37.5061	0.0259699	-1.13935	0	0	21	39.8392	0.0244863	-1.22421
TGME49_222170	0	0	147	192.733	0.00516173	0	0	166	166	0.00598802	0.214224	0	0	44	145.028	0.006848	0	0	122	175.99	0.00565003	-0.277425	0	0	99	187.814	0.00529623	-0.370718
TGME49_222180	0	0	11	14.4222	0.0648415	0	0	10	10	0.0909091	0.487507	0	0	3	9.88827	0.091842	0	0	9	12.9829	0.071516	-0.360888	0	0	6	11.3826	0.0807582	-0.185544
TGME49_222188	0	0	1	1.31111	0.432692	0	0	0	0	1	1.20859	0	0	0	0	1	0	0	1	1.44254	0.409409	-1.28838	0	0	0	0	1	0
TGME49_222192	0	0	4	5.24444	0.160142	0	0	6	6	0.142857	-0.164782	0	0	2	6.59218	0.131714	0	0	5	7.21271	0.121762	-0.113345	0	0	2	3.79421	0.208585	0.66322
TGME49_222200	0	0	11	14.4222	0.0648415	0	0	5	5	0.166667	1.36198	0	0	3	9.88827	0.091842	0	0	4	5.77017	0.147707	0.68551	0	0	8	15.1768	0.0618167	-0.571156
TGME49_222210	0	0	16	20.9778	0.0455005	0	0	11	11	0.0833333	0.873011	0	0	4	13.1844	0.0705002	0	0	5	7.21271	0.121762	0.78837	0	0	12	22.7653	0.0420782	-0.744554
TGME49_222220	0	0	304	398.578	0.00250264	0	0	378	378	0.00263852	0.0762785	0	0	122	402.123	0.00248063	0	0	288	415.452	0.00240124	-0.0469316	0	0	222	421.158	0.00236878	-0.0665618
TGME49_222230	0	0	10	13.1111	0.0708661	0	0	14	14	0.0666667	-0.0881309	0	0	4	13.1844	0.0705002	0	0	3	4.32763	0.187701	1.41274	0	0	6	11.3826	0.0807582	0.195982
TGME49_222240	4	5.24444	7	9.17778	0.613537	14	14	20	20	0.714286	0.219351	5	16.4804	3	9.88827	1.60544	22	31.7359	12	17.3105	1.78782	0.155236	4	7.58842	4	7.58842	1	-0.682968
TGME49_222245	4	5.24444	37	48.5111	0.126122	14	14	62	62	0.238095	0.916718	5	16.4804	14	46.1453	0.370779	22	31.7359	32	46.1614	0.694126	0.90464	4	7.58842	25	47.4277	0.177345	-1.064
TGME49_222250	0	0	1	1.31111	0.432692	0	0	2	2	0.333333	-0.376376	0	0	0	0	1	0	0	1	1.44254	0.409409	-1.28838	0	0	1	1.89711	0.345172	-1.53461
TGME49_222260	0	0	0	0	1	0	0	1	1	0.5	-1	0	0	0	0	1	0	0	0	0	1	0	0	0	0	0	1	0
TGME49_222270	0	0	38	49.8222	0.0196764	0	0	29	29	0.0333333	0.760497	0	0	11	36.257	0.0268406	0	0	22	31.7359	0.0305475	0.186635	0	0	23	43.6334	0.0224047	-0.260614
TGME49_222280	0	0	12	15.7333	0.059761	0	0	23	23	0.0416667	-0.52031	0	0	3	9.88827	0.091842	0	0	10	14.4254	0.064828	-0.502536	0	0	8	15.1768	0.0618167	-0.571156
TGME49_222290	0	0	12	15.7333	0.059761	0	0	10	10	0.0909091	0.605221	0	0	3	9.88827	0.091842	0	0	7	10.0978	0.090108	-0.0274991	0	0	4	7.58842	0.116436	0.342309
TGME49_222300	0	0	5	6.55556	0.132353	0	0	2	2	0.333333	1.33258	0	0	0	0	1	0	0	2	2.88509	0.257395	-1.95795	0	0	2	3.79421	0.208585	-2.26129
TGME49_222305	0	0	0	0	1	0	0	0	0	1	0	0	0	0	0	1	0	0	1	1.44254	0.409409	-1.28838	0	0	0	0	1	0
TGME49_222310	0	0	8	10.4889	0.0870406	0	0	13	13	0.0714286	-0.285188	0	0	5	16.4804	0.0572068	0	0	7	10.0978	0.090108	0.655468	0	0	4	7.58842	0.116436	1.02528
TGME49_222330	0	0	9	11.8	0.078125	0	0	4	4	0.2	1.35614	0	0	0	0	1	0	0	7	10.0978	0.090108	-3.4722	0	0	8	15.1768	0.0618167	-4.01586
TGME49_222340	0	0	1	1.31111	0.432692	0	0	0	0	1	1.20859	0	0	1	3.29609	0.23277	0	0	0	0	1	2.10302	0	0	0	0	1	2.10302
TGME49_222350	0	0	31	40.6444	0.0240128	0	0	47	47	0.0208333	-0.20491	0	0	17	56.0335	0.0175335	0	0	27	38.9487	0.0250321	0.513663	0	0	21	39.8392	0.0244863	0.481854
TGME49_222360	0	0	20	26.2222	0.0367347	0	0	14	14	0.0666667	0.859822	0	0	4	13.1844	0.0705002	0	0	16	23.0807	0.0415271	-0.763576	0	0	9	17.074	0.0553282	-0.349611
TGME49_222370	0	0	6	7.86667	0.112782	0	0	9	9	0.1	-0.173536	0	0	1	3.29609	0.23277	0	0	7	10.0978	0.090108	-1.36918	0	0	5	9.48553	0.0953695	-1.2873
TGME49_222380	0	0	21	27.5333	0.0350467	0	0	30	30	0.0322581	-0.11962	0	0	11	36.257	0.0268406	0	0	18	25.9658	0.0370841	0.466382	0	0	19	36.045	0.0269942	0.0082314
TGME49_222385	0	0	0	0	1	0	0	1	1	0.5	-1	0	0	0	0	1	0	0	0	0	1	0	0	0	0	0	1	0
TGME49_222390	0	0	3	3.93333	0.202703	0	0	10	10	0.0909091	-1.15687	0	0	3	9.88827	0.091842	0	0	11	15.868	0.059284	-0.631512	0	0	2	3.79421	0.208585	1.18341
TGME49_222400	0	0	26	34.0889	0.0284991	0	0	15	15	0.0625	1.13294	0	0	5	16.4804	0.0572068	0	0	20	28.8509	0.0334999	-0.77203	0	0	15	28.4566	0.0339483	-0.752848
TGME49_222410	0	0	9	11.8	0.078125	0	0	23	23	0.0416667	-0.906891	0	0	4	13.1844	0.0705002	0	0	12	17.3105	0.0546134	-0.368371	0	0	4	7.58842	0.116436	0.723835
TGME49_222420	0	0	1	1.31111	0.432692	0	0	0	0	1	1.20859	0	0	0	0	1	0	0	1	1.44254	0.409409	-1.28838	0	0	0	0	1	0
TGME49_222430	0	0	8	10.4889	0.0870406	0	0	14	14	0.0666667	-0.384723	0	0	6	19.7765	0.0481312	0	0	7	10.0978	0.090108	0.904682	0	0	6	11.3826	0.0807582	0.746637
TGME49_222440	0	0	0	0	1	0	0	0	0	1	0	0	0	1	3.29609	0.23277	0	0	0	0	1	2.10302	0	0	0	0	1	2.10302
TGME49_222660	0	0	41	53.7556	0.018263	0	0	32	32	0.030303	0.730539	0	0	14	46.1453	0.021211	0	0	24	34.621	0.0280733	0.404383	0	0	28	53.119	0.0184778	-0.199022
TGME49_222680	0	0	0	0	1	0	0	0	0	1	0	0	0	0	0	1	0	0	0	0	1	0	0	0	0	0	1	0
TGME49_222690	0	0	0	0	1	0	0	0	0	1	0	0	0	0	0	1	0	0	0	0	1	0	0	0	0	0	1	0
TGME49_222700	0	0	0	0	1	0	0	0	0	1	0	0	0	0	0	1	0	0	0	0	1	0	0	0	0	0	1	0
TGME49_222710	0	0	15	19.6667	0.0483871	0	0	14	14	0.0666667	0.462343	0	0	6	19.7765	0.0481312	0	0	19	27.4083	0.035201	-0.451358	0	0	11	20.8682	0.0457286	-0.0738772
TGME49_222800	0	0	7	9.17778	0.0982533	0	0	9	9	0.1	0.0254226	0	0	0	0	1	0	0	7	10.0978	0.090108	-3.4722	0	0	4	7.58842	0.116436	-3.10239
TGME49_222840	0	0	121	158.644	0.00626392	0	0	232	232	0.00429185	-0.545468	0	0	56	184.581	0.00538848	1	1.44254	130	187.531	0.0129557	1.26563	0	0	76	144.18	0.006888	0.354206
TGME49_222850	0	0	94	123.244	0.00804865	0	0	147	147	0.00675676	-0.252416	0	0	41	135.14	0.0073454	0	0	91	131.271	0.00756021	0.0415864	0	0	65	123.312	0.00804428	0.131123
TGME49_222860	0	0	126	165.2	0.00601685	0	0	137	137	0.00724638	0.268252	0	0	49	161.508	0.00615353	1	1.44254	119	171.663	0.0141463	1.20094	0	0	91	172.637	0.00575915	-0.0955574
TGME49_222870	0	0	23	30.1556	0.032097	0	0	29	29	0.0333333	0.0545269	0	0	7	23.0726	0.041541	0	0	14	20.1956	0.0471796	0.183629	0	0	12	22.7653	0.0420782	0.0185385
TGME49_222880	0	0	4	5.24444	0.160142	0	0	2	2	0.333333	1.05761	0	0	1	3.29609	0.23277	0	0	0	0	1	2.10302	0	0	1	1.89711	0.345172	0.568411
TGME49_222900	0	0	19	24.9111	0.0385935	0	0	13	13	0.0714286	0.888144	0	0	10	32.9609	0.0294456	0	0	13	18.7531	0.0506251	0.781799	0	0	10	18.9711	0.0500725	0.765963
TGME49_222910	0	0	19	24.9111	0.0385935	2	2	31	31	0.09375	1.28046	0	0	13	42.8492	0.0228055	4	5.77017	23	33.1785	0.198083	3.11865	0	0	15	28.4566	0.0339483	0.573959
TGME49_222920	0	0	25	32.7778	0.0296053	2	2	63	63	0.046875	0.662965	0	0	10	32.9609	0.0294456	4	5.77017	44	63.4719	0.10501	1.8344	0	0	11	20.8682	0.0457286	0.635042
TGME49_222930	0	0	8	10.4889	0.0870406	0	0	9	9	0.1	0.200239	0	0	4	13.1844	0.0705002	0	0	7	10.0978	0.090108	0.354027	0	0	5	9.48553	0.0953695	0.435901
TGME49_222935	0	0	0	0	1	0	0	0	0	1	0	0	0	0	0	1	0	0	2	2.88509	0.257395	-1.95795	0	0	0	0	1	0
TGME49_222940	0	0	1	1.31111	0.432692	0	0	2	2	0.333333	-0.376376	0	0	0	0	1	0	0	4	5.77017	0.147707	-2.75919	0	0	0	0	1	0
TGME49_222948	8	10.4889	16	20.9778	0.52275	11	11	27	27	0.428571	-0.286586	9	29.6648	7	23.0726	1.27385	22	31.7359	20	28.8509	1.09665	-0.216087	8	15.1768	13	24.6624	0.630372	-1.01491
TGME49_222952	8	10.4889	10	13.1111	0.814173	11	11	13	13	0.857143	0.0741999	9	29.6648	1	3.29609	7.13784	22	31.7359	14	20.1956	1.54447	-2.20838	8	15.1768	8	15.1768	1	-2.83549
TGME49_222960	0	0	10	13.1111	0.0708661	0	0	11	11	0.0833333	0.233797	0	0	2	6.59218	0.131714	1	1.44254	4	5.77017	0.36078	1.45371	0	0	5	9.48553	0.0953695	-0.465814
TGME49_222970	0	0	12	15.7333	0.059761	0	0	49	49	0.02	-1.5792	0	0	8	26.3687	0.0365381	1	1.44254	20	28.8509	0.0818249	1.16314	0	0	10	18.9711	0.0500725	0.454617
TGME49_222975	0	0	0	0	1	0	0	0	0	1	0	0	0	0	0	1	0	0	0	0	1	0	0	0	0	0	1	0
TGME49_222980	0	0	0	0	1	0	0	0	0	1	0	0	0	0	0	1	0	0	0	0	1	0	0	0	0	0	1	0
TGME49_222990	0	0	20	26.2222	0.0367347	0	0	21	21	0.0454545	0.307281	0	0	11	36.257	0.0268406	0	0	31	44.7188	0.0218728	-0.295278	0	0	13	24.6624	0.0389675	0.537856
TGME49_223000	112	146.844	160	209.778	0.701423	156	156	220	220	0.710407	0.0183609	143	471.341	50	164.804	2.84878	301	434.205	171	246.675	1.75716	-0.697096	112	212.476	112	212.476	1	-1.51035
TGME49_223010	112	146.844	184	241.244	0.610311	156	156	244	244	0.640816	0.0703664	143	471.341	62	204.358	2.30009	301	434.205	196	282.738	1.53383	-0.584555	112	212.476	128	242.83	0.875513	-1.39349
TGME49_223020	0	0	11	14.4222	0.0648415	0	0	18	18	0.0526316	-0.300989	0	0	4	13.1844	0.0705002	0	0	12	17.3105	0.0546134	-0.368371	0	0	7	13.2797	0.0700293	-0.00966918
TGME49_223025	0	0	0	0	1	0	0	0	0	1	0	0	0	0	0	1	0	0	0	0	1	0	0	0	0	0	1	0
TGME49_223030	0	0	0	0	1	0	0	0	0	1	0	0	0	0	0	1	0	0	0	0	1	0	0	0	0	0	1	0
TGME49_223040	0	0	144	188.8	0.0052687	0	0	138	138	0.00719424	0.449395	0	0	52	171.397	0.00580058	0	0	128	184.645	0.00538661	-0.106818	0	0	101	191.608	0.0051919	-0.159934
TGME49_223045	0	0	0	0	1	0	0	1	1	0.5	-1	0	0	0	0	1	0	0	0	0	1	0	0	0	0	0	1	0
TGME49_223050	0	0	1213	1590.38	0.000628386	0	0	1753	1753	0.000570125	-0.140372	0	0	448	1476.65	0.000676751	0	0	1171	1689.22	0.00059164	-0.193906	0	0	831	1576.5	0.000633916	-0.0943329
TGME49_223060	0	0	20	26.2222	0.0367347	0	0	27	27	0.0357143	-0.040642	0	0	18	59.3296	0.0165756	0	0	29	41.8337	0.0233461	0.494119	0	0	14	26.5595	0.0362851	1.13032
TGME49_223070	0	0	93	121.933	0.00813449	0	0	163	163	0.00609756	-0.41582	0	0	42	138.436	0.00717176	0	0	95	137.042	0.00724419	0.0144978	0	0	68	129.003	0.00769212	0.101053
TGME49_223080	0	0	50	65.5556	0.015025	0	0	48	48	0.0204082	0.441777	0	0	24	79.1061	0.0124834	0	0	40	57.7017	0.0170353	0.44851	0	0	34	64.5016	0.0152668	0.290383
TGME49_223095	0	0	0	0	1	0	0	3	3	0.25	-2	0	0	0	0	1	0	0	1	1.44254	0.409409	-1.28838	0	0	0	0	1	0
TGME49_223110	0	0	68	89.1556	0.0110919	0	0	82	82	0.0120482	0.119305	0	0	23	75.8101	0.0130191	0	0	61	87.9951	0.0112366	-0.212431	0	0	44	83.4727	0.0118381	-0.137189
TGME49_223120	0	0	0	0	1	0	0	0	0	1	0	0	0	0	0	1	0	0	0	0	1	0	0	0	0	0	1	0
TGME49_223125	0	0	48	62.9333	0.0156413	0	0	48	48	0.0204082	0.383787	0	0	19	62.6257	0.0157169	0	0	31	44.7188	0.0218728	0.476821	0	0	36	68.2958	0.0144309	-0.123159
TGME49_223130	0	0	6	7.86667	0.112782	0	0	3	3	0.25	1.14839	0	0	1	3.29609	0.23277	0	0	5	7.21271	0.121762	-0.934835	0	0	4	7.58842	0.116436	-0.999369
TGME49_223140	0	0	66	86.5333	0.0114242	0	0	88	88	0.011236	-0.0239728	0	0	29	95.5866	0.0103534	0	0	79	113.961	0.00869861	-0.251248	0	0	43	81.5756	0.0121101	0.226108
TGME49_223150	0	0	12	15.7333	0.059761	0	0	13	13	0.0714286	0.257298	0	0	3	9.88827	0.091842	0	0	13	18.7531	0.0506251	-0.859301	0	0	10	18.9711	0.0500725	-0.875136
TGME49_223258	0	0	0	0	1	0	0	0	0	1	0	0	0	0	0	1	0	0	0	0	1	0	0	0	0	0	1	0
TGME49_223262	0	0	6	7.86667	0.112782	0	0	7	7	0.125	0.148392	0	0	4	13.1844	0.0705002	0	0	9	12.9829	0.071516	0.0206387	0	0	3	5.69132	0.149447	1.08394
TGME49_223270	0	0	5	6.55556	0.132353	0	0	5	5	0.166667	0.332575	0	0	2	6.59218	0.131714	0	0	6	8.65526	0.103571	-0.346801	0	0	3	5.69132	0.149447	0.182223
TGME49_223390	0	0	49	64.2444	0.015327	0	0	32	32	0.030303	0.983389	0	0	8	26.3687	0.0365381	0	0	30	43.2763	0.0225855	-0.694006	0	0	33	62.6045	0.0157222	-1.2166
TGME49_223400	0	0	0	0	1	0	0	0	0	1	0	0	0	0	0	1	0	0	0	0	1	0	0	0	0	0	1	0
TGME49_223410	0	0	123	161.267	0.0061627	0	0	188	188	0.00529101	-0.22002	0	0	52	171.397	0.00580058	0	0	108	155.795	0.00637777	0.136856	0	0	85	161.254	0.00616318	0.0874775
TGME49_223420	0	0	9	11.8	0.078125	0	0	10	10	0.0909091	0.21864	0	0	3	9.88827	0.091842	0	0	14	20.1956	0.0471796	-0.96099	0	0	5	9.48553	0.0953695	0.0543746
TGME49_223430	0	0	1	1.31111	0.432692	0	0	1	1	0.5	0.208587	0	0	0	0	1	0	0	3	4.32763	0.187701	-2.41349	0	0	0	0	1	0
TGME49_223440	0	0	4	5.24444	0.160142	0	0	9	9	0.1	-0.679355	0	0	0	0	1	0	0	7	10.0978	0.090108	-3.4722	0	0	2	3.79421	0.208585	-2.26129
TGME49_223450	0	0	6	7.86667	0.112782	0	0	17	17	0.0555556	-1.02153	0	0	4	13.1844	0.0705002	0	0	6	8.65526	0.103571	0.554914	0	0	6	11.3826	0.0807582	0.195982
TGME49_223470	0	0	6	7.86667	0.112782	0	0	17	17	0.0555556	-1.02153	0	0	4	13.1844	0.0705002	0	0	6	8.65526	0.103571	0.554914	0	0	6	11.3826	0.0807582	0.195982
TGME49_223480	0	0	0	0	1	0	0	2	2	0.333333	-1.58496	0	0	0	0	1	0	0	0	0	1	0	0	0	0	0	1	0
TGME49_223485	0	0	62	81.2889	0.0121523	0	0	50	50	0.0196078	0.6902	0	0	16	52.7374	0.018609	0	0	41	59.1443	0.0166267	-0.1625	0	0	40	75.8842	0.0130066	-0.516761
TGME49_223490	0	0	17	22.2889	0.0429389	0	0	26	26	0.037037	-0.213318	0	0	6	19.7765	0.0481312	0	0	25	36.0636	0.0269807	-0.835047	0	0	13	24.6624	0.0389675	-0.3047
TGME49_223500	0	0	6	7.86667	0.112782	0	0	1	1	0.5	2.14839	0	0	2	6.59218	0.131714	0	0	3	4.32763	0.187701	0.511021	0	0	3	5.69132	0.149447	0.182223
TGME49_223510	0	0	12	15.7333	0.059761	0	0	21	21	0.0454545	-0.394779	0	0	8	26.3687	0.0365381	0	0	10	14.4254	0.064828	0.827217	0	0	10	18.9711	0.0500725	0.454617
TGME49_223520	0	0	0	0	1	0	0	1	1	0.5	-1	0	0	0	0	1	0	0	0	0	1	0	0	0	0	0	1	0
TGME49_223530	0	0	43	56.3778	0.0174284	0	0	51	51	0.0192308	0.14198	0	0	13	42.8492	0.0228055	0	0	39	56.2592	0.0174645	-0.384957	0	0	29	55.0161	0.017852	-0.353292
TGME49_223540	0	0	10	13.1111	0.0708661	0	0	22	22	0.0434783	-0.704802	0	0	11	36.257	0.0268406	0	0	17	24.5232	0.03918	0.5457	0	0	8	15.1768	0.0618167	1.20358
TGME49_223550	0	0	3	3.93333	0.202703	0	0	9	9	0.1	-1.01937	0	0	3	9.88827	0.091842	0	0	6	8.65526	0.103571	0.173388	0	0	1	1.89711	0.345172	1.91009
TGME49_223560	0	0	3	3.93333	0.202703	0	0	0	0	1	2.30256	0	0	1	3.29609	0.23277	0	0	3	4.32763	0.187701	-0.310469	0	0	3	5.69132	0.149447	-0.639266
TGME49_223570	0	0	19	24.9111	0.0385935	0	0	30	30	0.0322581	-0.258697	0	0	6	19.7765	0.0481312	0	0	7	10.0978	0.090108	0.904682	0	0	15	28.4566	0.0339483	-0.503635
TGME49_223580	0	0	7	9.17778	0.0982533	0	0	8	8	0.111111	0.177426	0	0	0	0	1	0	0	7	10.0978	0.090108	-3.4722	0	0	5	9.48553	0.0953695	-3.39033
TGME49_223590	0	0	110	144.222	0.006886	0	0	158	158	0.00628931	-0.130765	0	0	46	151.62	0.00655222	0	0	105	151.467	0.0065588	0.00144814	0	0	78	147.974	0.00671257	0.0348818
TGME49_223600	0	0	4	5.24444	0.160142	0	0	7	7	0.125	-0.357427	0	0	2	6.59218	0.131714	0	0	8	11.5403	0.0797426	-0.723991	0	0	4	7.58842	0.116436	-0.17788
TGME49_223610	0	0	7	9.17778	0.0982533	0	0	10	10	0.0909091	-0.112081	0	0	5	16.4804	0.0572068	0	0	4	5.77017	0.147707	1.36848	0	0	5	9.48553	0.0953695	0.737342
TGME49_223620	0	0	9	11.8	0.078125	0	0	15	15	0.0625	-0.321928	0	0	9	29.6648	0.0326107	0	0	15	21.6381	0.0441732	0.437828	0	0	8	15.1768	0.0618167	0.922653
TGME49_223630	0	0	8	10.4889	0.0870406	0	0	6	6	0.142857	0.714812	0	0	1	3.29609	0.23277	0	0	6	8.65526	0.103571	-1.16829	0	0	5	9.48553	0.0953695	-1.2873
TGME49_223640	0	0	1	1.31111	0.432692	0	0	2	2	0.333333	-0.376376	0	0	1	3.29609	0.23277	1	1.44254	8	11.5403	0.194775	-0.257097	0	0	0	0	1	2.10302
TGME49_223650	0	0	0	0	1	0	0	0	0	1	0	0	0	0	0	1	1	1.44254	2	2.88509	0.628697	-0.669563	0	0	0	0	1	0
TGME49_223660	0	0	13	17.0444	0.0554187	0	0	20	20	0.047619	-0.218835	0	0	4	13.1844	0.0705002	0	0	11	15.868	0.059284	-0.249986	0	0	8	15.1768	0.0618167	-0.18963
TGME49_223668	0	0	16	20.9778	0.0455005	0	0	29	29	0.0333333	-0.448917	1	3.29609	11	36.257	0.11531	2	2.88509	29	41.8337	0.0907015	-0.346314	0	0	11	20.8682	0.0457286	-1.33435
TGME49_223672	0	0	30	39.3333	0.0247934	0	0	22	22	0.0434783	0.810339	1	3.29609	11	36.257	0.11531	2	2.88509	17	24.5232	0.152218	0.400622	0	0	20	37.9421	0.0256791	-2.16684
TGME49_223680	0	0	78	102.267	0.00968367	0	0	95	95	0.0104167	0.105268	0	0	30	98.8827	0.0100117	0	0	79	113.961	0.00869861	-0.202837	0	0	51	96.7524	0.0102299	0.0311023
TGME49_223685	0	0	28	36.7111	0.0265174	0	0	28	28	0.0344828	0.378937	0	0	5	16.4804	0.0572068	0	0	24	34.621	0.0280733	-1.02699	0	0	16	30.3537	0.0318942	-0.842894
TGME49_223690	0	0	34	44.5778	0.0219405	0	0	55	55	0.0178571	-0.297096	0	0	14	46.1453	0.021211	0	0	46	66.357	0.0148463	-0.514715	0	0	23	43.6334	0.0224047	0.0789874
TGME49_223700	0	0	5	6.55556	0.132353	0	0	6	6	0.142857	0.110183	0	0	0	0	1	0	0	8	11.5403	0.0797426	-3.6485	0	0	2	3.79421	0.208585	-2.26129
TGME49_223710	0	0	26	34.0889	0.0284991	0	0	21	21	0.0454545	0.673511	0	0	6	19.7765	0.0481312	0	0	21	30.2934	0.0319556	-0.590903	0	0	17	32.2508	0.0300745	-0.678434
TGME49_223725	0	0	2	2.62222	0.276074	0	0	3	3	0.25	-0.143125	0	0	0	0	1	0	0	0	0	1	0	0	0	1	1.89711	0.345172	-1.53461
TGME49_223750	0	0	8	10.4889	0.0870406	0	0	27	27	0.0357143	-1.28519	0	0	5	16.4804	0.0572068	0	0	7	10.0978	0.090108	0.655468	0	0	6	11.3826	0.0807582	0.497424
TGME49_223760	0	0	12	15.7333	0.059761	0	0	14	14	0.0666667	0.157762	0	0	8	26.3687	0.0365381	0	0	12	17.3105	0.0546134	0.579855	0	0	9	17.074	0.0553282	0.598615
TGME49_223770	0	0	1	1.31111	0.432692	0	0	0	0	1	1.20859	0	0	0	0	1	0	0	0	0	1	0	0	0	0	0	1	0
TGME49_223780	0	0	6	7.86667	0.112782	0	0	4	4	0.2	0.826464	0	0	3	9.88827	0.091842	0	0	2	2.88509	0.257395	1.48676	0	0	4	7.58842	0.116436	0.342309
TGME49_223790	0	0	41	53.7556	0.018263	0	0	37	37	0.0263158	0.527006	0	0	10	32.9609	0.0294456	0	0	31	44.7188	0.0218728	-0.428914	0	0	25	47.4277	0.0206494	-0.511957
TGME49_223800	0	0	13	17.0444	0.0554187	0	0	10	10	0.0909091	0.714051	0	0	3	9.88827	0.091842	0	0	6	8.65526	0.103571	0.173388	0	0	8	15.1768	0.0618167	-0.571156
TGME49_223810	0	0	11	14.4222	0.0648415	0	0	15	15	0.0625	-0.0530612	0	0	3	9.88827	0.091842	0	0	6	8.65526	0.103571	0.173388	0	0	7	13.2797	0.0700293	-0.391195
TGME49_223830	0	0	2	2.62222	0.276074	0	0	3	3	0.25	-0.143125	0	0	0	0	1	0	0	0	0	1	0	0	0	1	1.89711	0.345172	-1.53461
TGME49_223840	0	0	36	47.2	0.0207469	0	0	34	34	0.0285714	0.461678	0	0	7	23.0726	0.041541	0	0	17	24.5232	0.03918	-0.0844173	0	0	25	47.4277	0.0206494	-1.00844
TGME49_223845	0	0	5	6.55556	0.132353	0	0	6	6	0.142857	0.110183	0	0	3	9.88827	0.091842	0	0	3	4.32763	0.187701	1.03121	0	0	4	7.58842	0.116436	0.342309
TGME49_223855	0	0	29	38.0222	0.0256264	0	0	46	46	0.0212766	-0.268365	0	0	10	32.9609	0.0294456	0	0	17	24.5232	0.03918	0.412064	0	0	20	37.9421	0.0256791	-0.197457
TGME49_223870	0	0	3	3.93333	0.202703	0	0	3	3	0.25	0.302563	0	0	0	0	1	0	0	1	1.44254	0.409409	-1.28838	0	0	2	3.79421	0.208585	-2.26129
TGME49_223880	0	0	5	6.55556	0.132353	0	0	15	15	0.0625	-1.08246	0	0	5	16.4804	0.0572068	0	0	9	12.9829	0.071516	0.32208	0	0	2	3.79421	0.208585	1.86638
TGME49_223900	0	0	0	0	1	0	0	0	0	1	0	0	0	0	0	1	0	0	0	0	1	0	0	0	0	0	1	0
TGME49_223910	0	0	25	32.7778	0.0296053	0	0	26	26	0.037037	0.323115	0	0	7	23.0726	0.041541	0	0	10	14.4254	0.064828	0.642083	0	0	15	28.4566	0.0339483	-0.291197
TGME49_223915	0	0	0	0	1	0	0	0	0	1	0	0	0	0	0	1	0	0	0	0	1	0	0	0	0	0	1	0
TGME49_223920	0	0	219	287.133	0.00347062	0	0	187	187	0.00531915	0.616004	0	0	100	329.609	0.00302472	0	0	135	194.743	0.00510873	0.756163	0	0	140	265.595	0.00375101	0.310477
TGME49_223930	0	0	36	47.2	0.0207469	0	0	71	71	0.0138889	-0.578964	0	0	21	69.2179	0.0142414	0	0	41	59.1443	0.0166267	0.223411	0	0	26	49.3248	0.0198709	0.48057
TGME49_223940	0	0	466	610.978	0.00163405	0	0	435	435	0.00229358	0.489151	0	0	153	504.302	0.00197902	1	1.44254	320	461.614	0.00527988	1.41572	0	0	325	616.559	0.00161928	-0.289433
TGME49_223950	0	0	21	27.5333	0.0350467	0	0	18	18	0.0526316	0.586649	0	0	3	9.88827	0.091842	1	1.44254	18	25.9658	0.0905794	-0.0199709	0	0	13	24.6624	0.0389675	-1.23688
TGME49_223960	0	0	15	19.6667	0.0483871	0	0	18	18	0.0526316	0.121306	0	0	5	16.4804	0.0572068	0	0	15	21.6381	0.0441732	-0.373013	0	0	11	20.8682	0.0457286	-0.32309
TGME49_223970	0	0	9	11.8	0.078125	0	0	12	12	0.0769231	-0.0223678	0	0	5	16.4804	0.0572068	0	0	6	8.65526	0.103571	0.856356	0	0	7	13.2797	0.0700293	0.291772
TGME49_223985	0	0	9	11.8	0.078125	0	0	11	11	0.0833333	0.0931094	0	0	7	23.0726	0.041541	0	0	5	7.21271	0.121762	1.55146	0	0	7	13.2797	0.0700293	0.753424
TGME49_224000	0	0	39	51.1333	0.0191816	0	0	34	34	0.0285714	0.574851	0	0	18	59.3296	0.0165756	0	0	21	30.2934	0.0319556	0.947008	0	0	25	47.4277	0.0206494	0.317035
TGME49_224010	0	0	0	0	1	0	0	0	0	1	0	0	0	0	0	1	0	0	0	0	1	0	0	0	0	0	1	0
TGME49_224020	0	0	25	32.7778	0.0296053	0	0	36	36	0.027027	-0.131451	0	0	11	36.257	0.0268406	0	0	30	43.2763	0.0225855	-0.249023	0	0	15	28.4566	0.0339483	0.33892
TGME49_224030	0	0	5	6.55556	0.132353	0	0	8	8	0.111111	-0.252387	0	0	2	6.59218	0.131714	0	0	4	5.77017	0.147707	0.165322	0	0	4	7.58842	0.116436	-0.17788
TGME49_224040	0	0	0	0	1	0	0	0	0	1	0	0	0	0	0	1	0	0	0	0	1	0	0	0	0	0	1	0
TGME49_224050	0	0	20	26.2222	0.0367347	0	0	22	22	0.0434783	0.243151	0	0	13	42.8492	0.0228055	0	0	21	30.2934	0.0319556	0.486691	0	0	13	24.6624	0.0389675	0.772894
TGME49_224060	0	0	38	49.8222	0.0196764	0	0	65	65	0.0151515	-0.377007	0	0	20	65.9218	0.0149428	0	0	49	70.6846	0.01395	-0.0991872	0	0	20	37.9421	0.0256791	0.781144
TGME49_224070	0	0	2	2.62222	0.276074	0	0	2	2	0.333333	0.271913	0	0	2	6.59218	0.131714	0	0	1	1.44254	0.409409	1.63613	0	0	2	3.79421	0.208585	0.66322
TGME49_224080	0	0	0	0	1	0	0	0	0	1	0	0	0	0	0	1	0	0	1	1.44254	0.409409	-1.28838	0	0	0	0	1	0
TGME49_224090	0	0	16	20.9778	0.0455005	0	0	26	26	0.037037	-0.296914	0	0	10	32.9609	0.0294456	0	0	24	34.621	0.0280733	-0.0688547	0	0	14	26.5595	0.0362851	0.301325
TGME49_224100	0	0	4	5.24444	0.160142	0	0	0	0	1	2.64257	0	0	0	0	1	0	0	0	0	1	0	0	0	1	1.89711	0.345172	-1.53461
TGME49_224110	0	0	45	59	0.0166667	0	0	58	58	0.0169492	0.0242475	0	0	18	59.3296	0.0165756	0	0	29	41.8337	0.0233461	0.494119	0	0	33	62.6045	0.0157222	-0.0762626
TGME49_224120	0	0	0	0	1	0	0	0	0	1	0	0	0	0	0	1	0	0	0	0	1	0	0	0	0	0	1	0
TGME49_224130	0	0	1123	1472.38	0.000678713	0	0	984	984	0.00101523	0.580932	0	0	427	1407.43	0.00071001	0	0	651	939.095	0.00106372	0.583209	0	0	767	1455.08	0.000686775	-0.048002
TGME49_224140	0	0	0	0	1	0	0	6	6	0.142857	-2.80735	0	0	0	0	1	0	0	12	17.3105	0.0546134	-4.1946	0	0	0	0	1	0
TGME49_224150	0	0	2	2.62222	0.276074	0	0	2	2	0.333333	0.271913	0	0	1	3.29609	0.23277	0	0	3	4.32763	0.187701	-0.310469	0	0	2	3.79421	0.208585	-0.15827
TGME49_224160	0	0	10	13.1111	0.0708661	0	0	4	4	0.2	1.49683	0	0	1	3.29609	0.23277	0	0	7	10.0978	0.090108	-1.36918	0	0	9	17.074	0.0553282	-2.07282
TGME49_224170	0	0	2	2.62222	0.276074	0	0	4	4	0.2	-0.465053	0	0	0	0	1	0	0	3	4.32763	0.187701	-2.41349	0	0	1	1.89711	0.345172	-1.53461
TGME49_224180	0	0	1	1.31111	0.432692	0	0	4	4	0.2	-1.11334	0	0	0	0	1	0	0	6	8.65526	0.103571	-3.27131	0	0	1	1.89711	0.345172	-1.53461
TGME49_224190	0	0	16	20.9778	0.0455005	0	0	15	15	0.0625	0.457974	0	0	6	19.7765	0.0481312	0	0	15	21.6381	0.0441732	-0.1238	0	0	11	20.8682	0.0457286	-0.0738772
TGME49_224200	0	0	6	7.86667	0.112782	0	0	7	7	0.125	0.148392	0	0	2	6.59218	0.131714	0	0	10	14.4254	0.064828	-1.02272	0	0	6	11.3826	0.0807582	-0.705733
TGME49_224205	0	0	21	27.5333	0.0350467	0	0	41	41	0.0238095	-0.557741	0	0	17	56.0335	0.0175335	0	0	32	46.1614	0.0212038	0.274204	0	0	15	28.4566	0.0339483	0.95322
TGME49_224210	0	0	16	20.9778	0.0455005	0	0	18	18	0.0526316	0.210046	0	0	3	9.88827	0.091842	0	0	8	11.5403	0.0797426	-0.203802	0	0	11	20.8682	0.0457286	-1.00606
TGME49_224220	0	0	6	7.86667	0.112782	0	0	9	9	0.1	-0.173536	0	0	8	26.3687	0.0365381	0	0	6	8.65526	0.103571	1.50314	0	0	4	7.58842	0.116436	1.67206
TGME49_224230	0	0	1	1.31111	0.432692	0	0	9	9	0.1	-2.11334	0	0	1	3.29609	0.23277	0	0	3	4.32763	0.187701	-0.310469	0	0	1	1.89711	0.345172	0.568411
TGME49_224235	0	0	17	22.2889	0.0429389	0	0	22	22	0.0434783	0.0180079	0	0	5	16.4804	0.0572068	0	0	7	10.0978	0.090108	0.655468	0	0	10	18.9711	0.0500725	-0.192169
TGME49_224240	0	0	30	39.3333	0.0247934	0	0	25	25	0.0384615	0.633461	0	0	15	49.4413	0.019825	0	0	9	12.9829	0.071516	1.85094	0	0	21	39.8392	0.0244863	0.304651
TGME49_224250	0	0	0	0	1	0	0	0	0	1	0	0	0	0	0	1	0	0	0	0	1	0	0	0	0	0	1	0
TGME49_224260	0	0	32	41.9556	0.0232799	0	0	18	18	0.0526316	1.17685	0	0	8	26.3687	0.0365381	0	0	18	25.9658	0.0370841	0.0213985	0	0	20	37.9421	0.0256791	-0.508804
TGME49_224270	0	0	5	6.55556	0.132353	0	0	6	6	0.142857	0.110183	0	0	1	3.29609	0.23277	0	0	3	4.32763	0.187701	-0.310469	0	0	2	3.79421	0.208585	-0.15827
TGME49_224275	0	0	0	0	1	0	0	0	0	1	0	0	0	0	0	1	0	0	1	1.44254	0.409409	-1.28838	0	0	0	0	1	0
TGME49_224280	0	0	8	10.4889	0.0870406	0	0	10	10	0.0909091	0.0627358	0	0	6	19.7765	0.0481312	0	0	4	5.77017	0.147707	1.61769	0	0	4	7.58842	0.116436	1.27449
TGME49_224290	0	0	40	52.4444	0.018711	1	1	48	48	0.0408163	1.12526	0	0	13	42.8492	0.0228055	1	1.44254	28	40.3912	0.0590112	1.37161	0	0	24	45.5305	0.0214913	-0.0856289
TGME49_224310	0	0	7	9.17778	0.0982533	1	1	22	22	0.0869565	-0.176211	0	0	2	6.59218	0.131714	2	2.88509	18	25.9658	0.144075	0.129403	0	0	3	5.69132	0.149447	0.182223
TGME49_224320	0	0	6	7.86667	0.112782	0	0	3	3	0.25	1.14839	0	0	2	6.59218	0.131714	1	1.44254	3	4.32763	0.458467	1.7994	0	0	6	11.3826	0.0807582	-0.705733
TGME49_224330	0	0	16	20.9778	0.0455005	0	0	18	18	0.0526316	0.210046	0	0	2	6.59218	0.131714	0	0	26	37.5061	0.0259699	-2.3425	0	0	11	20.8682	0.0457286	-1.52625
TGME49_224340	0	0	7	9.17778	0.0982533	0	0	17	17	0.0555556	-0.822574	0	0	5	16.4804	0.0572068	0	0	13	18.7531	0.0506251	-0.176334	0	0	6	11.3826	0.0807582	0.497424
TGME49_224350	0	0	24	31.4667	0.0308008	0	0	41	41	0.0238095	-0.37143	0	0	11	36.257	0.0268406	0	0	34	49.0465	0.0199814	-0.425757	0	0	17	32.2508	0.0300745	0.164122
TGME49_224460	0	0	198	259.6	0.0038373	0	0	252	252	0.00395257	0.0426997	0	0	93	306.536	0.00325165	0	0	110	158.68	0.00626254	0.945576	0	0	131	248.521	0.00400768	0.301596
TGME49_224470	0	0	26	34.0889	0.0284991	0	0	36	36	0.027027	-0.076511	0	0	4	13.1844	0.0705002	1	1.44254	13	18.7531	0.123654	0.810609	0	0	13	24.6624	0.0389675	-0.855354
TGME49_224480	0	0	26	34.0889	0.0284991	0	0	32	32	0.030303	0.0885482	0	0	6	19.7765	0.0481312	1	1.44254	17	24.5232	0.0956988	0.991528	0	0	19	36.045	0.0269942	-0.834324
TGME49_224490	0	0	7	9.17778	0.0982533	0	0	6	6	0.142857	0.539996	0	0	3	9.88827	0.091842	0	0	2	2.88509	0.257395	1.48676	0	0	2	3.79421	0.208585	1.18341
TGME49_224500	0	0	0	0	1	0	0	0	0	1	0	0	0	0	0	1	0	0	0	0	1	0	0	0	0	0	1	0
TGME49_224510	0	0	6	7.86667	0.112782	0	0	0	0	1	3.14839	0	0	2	6.59218	0.131714	0	0	1	1.44254	0.409409	1.63613	0	0	1	1.89711	0.345172	1.3899
TGME49_224520	0	0	73	95.7111	0.0103401	0	0	87	87	0.0113636	0.136178	0	0	31	102.179	0.00969192	0	0	65	93.7653	0.0105524	0.122716	0	0	39	73.9871	0.0133356	0.460431
TGME49_224530	0	0	50	65.5556	0.015025	0	0	55	55	0.0178571	0.249132	0	0	9	29.6648	0.0326107	0	0	31	44.7188	0.0218728	-0.576205	0	0	37	70.1929	0.0140463	-1.21515
TGME49_224540	0	0	11	14.4222	0.0648415	0	0	8	8	0.111111	0.777014	0	0	7	23.0726	0.041541	0	0	8	11.5403	0.0797426	0.940817	0	0	4	7.58842	0.116436	1.48693
TGME49_224560	0	0	8	10.4889	0.0870406	0	0	4	4	0.2	1.20024	0	0	4	13.1844	0.0705002	0	0	7	10.0978	0.090108	0.354027	0	0	2	3.79421	0.208585	1.56494
TGME49_224570	0	0	22	28.8444	0.0335071	0	0	44	44	0.0222222	-0.592463	0	0	10	32.9609	0.0294456	0	0	14	20.1956	0.0471796	0.68011	0	0	16	30.3537	0.0318942	0.115239
TGME49_224575	0	0	1	1.31111	0.432692	0	0	3	3	0.25	-0.791413	0	0	0	0	1	0	0	1	1.44254	0.409409	-1.28838	0	0	1	1.89711	0.345172	-1.53461
TGME49_224580	0	0	15	19.6667	0.0483871	0	0	20	20	0.047619	-0.0230836	0	0	3	9.88827	0.091842	0	0	15	21.6381	0.0441732	-1.05598	0	0	8	15.1768	0.0618167	-0.571156
TGME49_224590	0	0	8	10.4889	0.0870406	0	0	10	10	0.0909091	0.0627358	0	0	4	13.1844	0.0705002	0	0	11	15.868	0.059284	-0.249986	0	0	8	15.1768	0.0618167	-0.18963
TGME49_224600	0	0	8	10.4889	0.0870406	0	0	9	9	0.1	0.200239	0	0	2	6.59218	0.131714	0	0	5	7.21271	0.121762	-0.113345	0	0	6	11.3826	0.0807582	-0.705733
TGME49_224610	0	0	13	17.0444	0.0554187	0	0	19	19	0.05	-0.148445	0	0	4	13.1844	0.0705002	0	0	11	15.868	0.059284	-0.249986	0	0	11	20.8682	0.0457286	-0.624532
TGME49_224620	0	0	12	15.7333	0.059761	0	0	26	26	0.037037	-0.690235	0	0	6	19.7765	0.0481312	0	0	11	15.868	0.059284	0.300669	0	0	4	7.58842	0.116436	1.27449
TGME49_224630	0	0	1	1.31111	0.432692	0	0	5	5	0.166667	-1.37638	0	0	1	3.29609	0.23277	0	0	0	0	1	2.10302	0	0	1	1.89711	0.345172	0.568411
TGME49_224650	0	0	10	13.1111	0.0708661	0	0	11	11	0.0833333	0.233797	0	0	4	13.1844	0.0705002	0	0	10	14.4254	0.064828	-0.12101	0	0	7	13.2797	0.0700293	-0.00966918
TGME49_224660	0	0	18	23.6	0.0406504	0	0	24	24	0.04	-0.0232698	0	0	4	13.1844	0.0705002	0	0	15	21.6381	0.0441732	-0.674455	0	0	12	22.7653	0.0420782	-0.744554
TGME49_224670	0	0	7	9.17778	0.0982533	0	0	2	2	0.333333	1.76239	0	0	4	13.1844	0.0705002	0	0	5	7.21271	0.121762	0.78837	0	0	5	9.48553	0.0953695	0.435901
TGME49_224675	0	0	0	0	1	0	0	0	0	1	0	0	0	0	0	1	0	0	0	0	1	0	0	0	0	0	1	0
TGME49_224680	0	0	0	0	1	0	0	3	3	0.25	-2	0	0	0	0	1	0	0	1	1.44254	0.409409	-1.28838	0	0	0	0	1	0
TGME49_224700	0	0	30	39.3333	0.0247934	3	3	22	22	0.173913	2.81034	0	0	8	26.3687	0.0365381	3	4.32763	11	15.868	0.315843	3.11173	0	0	16	30.3537	0.0318942	-0.196108
TGME49_224710	0	0	5	6.55556	0.132353	3	3	23	23	0.166667	0.332575	0	0	1	3.29609	0.23277	3	4.32763	13	18.7531	0.269712	0.212513	0	0	3	5.69132	0.149447	-0.639266
TGME49_224720	0	0	12	15.7333	0.059761	0	0	9	9	0.1	0.742725	0	0	7	23.0726	0.041541	0	0	5	7.21271	0.121762	1.55146	0	0	7	13.2797	0.0700293	0.753424
TGME49_224730	0	0	10	13.1111	0.0708661	0	0	9	9	0.1	0.496832	0	0	1	3.29609	0.23277	0	0	8	11.5403	0.0797426	-1.54548	0	0	9	17.074	0.0553282	-2.07282
TGME49_224740	0	0	12	15.7333	0.059761	0	0	16	16	0.0588235	-0.0228099	0	0	5	16.4804	0.0572068	0	0	8	11.5403	0.0797426	0.479165	0	0	6	11.3826	0.0807582	0.497424
TGME49_224750	0	0	0	0	1	0	0	2	2	0.333333	-1.58496	0	0	0	0	1	0	0	1	1.44254	0.409409	-1.28838	0	0	0	0	1	0
TGME49_224760	0	0	0	0	1	0	0	3	3	0.25	-2	0	0	0	0	1	0	0	1	1.44254	0.409409	-1.28838	0	0	0	0	1	0
TGME49_224770	0	0	0	0	1	0	0	0	0	1	0	0	0	0	0	1	0	0	0	0	1	0	0	0	0	0	1	0
TGME49_224780	0	0	0	0	1	0	0	0	0	1	0	0	0	0	0	1	0	0	0	0	1	0	0	0	0	0	1	0
TGME49_224790	0	0	0	0	1	0	0	0	0	1	0	0	0	0	0	1	0	0	0	0	1	0	0	0	0	0	1	0
TGME49_224800	0	0	15	19.6667	0.0483871	0	0	16	16	0.0588235	0.281771	0	0	3	9.88827	0.091842	0	0	17	24.5232	0.03918	-1.22904	0	0	14	26.5595	0.0362851	-1.33977
TGME49_224810	0	0	0	0	1	0	0	2	2	0.333333	-1.58496	0	0	0	0	1	0	0	0	0	1	0	0	0	0	0	1	0
TGME49_224820	0	0	11	14.4222	0.0648415	0	0	24	24	0.04	-0.696917	0	0	5	16.4804	0.0572068	0	0	25	36.0636	0.0269807	-1.08426	0	0	9	17.074	0.0553282	-0.0481702
TGME49_224830	0	0	4	5.24444	0.160142	0	0	4	4	0.2	0.320645	0	0	2	6.59218	0.131714	0	0	3	4.32763	0.187701	0.511021	0	0	1	1.89711	0.345172	1.3899
TGME49_224840	0	0	2	2.62222	0.276074	0	0	13	13	0.0714286	-1.95048	0	0	2	6.59218	0.131714	0	0	8	11.5403	0.0797426	-0.723991	0	0	2	3.79421	0.208585	0.66322
TGME49_224845	0	0	5	6.55556	0.132353	0	0	6	6	0.142857	0.110183	0	0	2	6.59218	0.131714	0	0	4	5.77017	0.147707	0.165322	0	0	3	5.69132	0.149447	0.182223
TGME49_224850	0	0	135	177	0.00561798	0	0	105	105	0.00943396	0.747813	0	0	40	131.844	0.00752765	0	0	56	80.7824	0.0122276	0.699866	0	0	80	151.768	0.00654585	-0.201619
TGME49_224860	0	0	11	14.4222	0.0648415	0	0	14	14	0.0666667	0.0400482	0	0	5	16.4804	0.0572068	0	0	17	24.5232	0.03918	-0.546069	0	0	9	17.074	0.0553282	-0.0481702
TGME49_224870	0	0	11	14.4222	0.0648415	0	0	13	13	0.0714286	0.139584	0	0	5	16.4804	0.0572068	0	0	5	7.21271	0.121762	1.08981	0	0	9	17.074	0.0553282	-0.0481702
TGME49_224880	0	0	22	28.8444	0.0335071	0	0	9	9	0.1	1.57746	0	0	5	16.4804	0.0572068	0	0	9	12.9829	0.071516	0.32208	0	0	12	22.7653	0.0420782	-0.443113
TGME49_224890	0	0	16	20.9778	0.0455005	0	0	21	21	0.0454545	-0.001458	0	0	2	6.59218	0.131714	0	0	10	14.4254	0.064828	-1.02272	0	0	8	15.1768	0.0618167	-1.09134
TGME49_224900	0	0	80	104.889	0.00944386	0	0	123	123	0.00806452	-0.227789	0	0	29	95.5866	0.0103534	0	0	91	131.271	0.00756021	-0.453606	0	0	50	94.8553	0.0104324	0.0109646
TGME49_224905	0	0	0	0	1	0	0	0	0	1	0	0	0	0	0	1	0	0	0	0	1	0	0	0	0	0	1	0
TGME49_224910	0	0	29	38.0222	0.0256264	0	0	31	31	0.03125	0.286224	0	0	8	26.3687	0.0365381	0	0	13	18.7531	0.0506251	0.470452	0	0	20	37.9421	0.0256791	-0.508804
TGME49_224920	0	0	6	7.86667	0.112782	0	0	8	8	0.111111	-0.0215332	0	0	5	16.4804	0.0572068	0	0	8	11.5403	0.0797426	0.479165	0	0	5	9.48553	0.0953695	0.737342
TGME49_224928	0	0	0	0	1	0	0	3	3	0.25	-2	0	0	1	3.29609	0.23277	0	0	1	1.44254	0.409409	0.81464	0	0	0	0	1	2.10302
TGME49_224932	0	0	1	1.31111	0.432692	0	0	2	2	0.333333	-0.376376	0	0	0	0	1	0	0	0	0	1	0	0	0	1	1.89711	0.345172	-1.53461
TGME49_224935	0	0	7	9.17778	0.0982533	0	0	9	9	0.1	0.0254226	0	0	3	9.88827	0.091842	0	0	1	1.44254	0.409409	2.15632	0	0	5	9.48553	0.0953695	0.0543746
TGME49_224940	0	0	0	0	1	0	0	2	2	0.333333	-1.58496	0	0	1	3.29609	0.23277	0	0	2	2.88509	0.257395	0.145078	0	0	0	0	1	2.10302
TGME49_224950	0	0	16	20.9778	0.0455005	0	0	19	19	0.05	0.136046	0	0	10	32.9609	0.0294456	0	0	12	17.3105	0.0546134	0.891202	0	0	10	18.9711	0.0500725	0.765963
TGME49_224960	0	0	11	14.4222	0.0648415	0	0	17	17	0.0555556	-0.222986	0	0	3	9.88827	0.091842	0	0	16	23.0807	0.0415271	-1.1451	0	0	8	15.1768	0.0618167	-0.571156
TGME49_224970	0	0	19	24.9111	0.0385935	0	0	26	26	0.037037	-0.0593885	0	0	5	16.4804	0.0572068	0	0	15	21.6381	0.0441732	-0.373013	0	0	13	24.6624	0.0389675	-0.553913
TGME49_224980	0	0	14	18.3556	0.0516648	0	0	18	18	0.0526316	0.0267483	0	0	5	16.4804	0.0572068	0	0	6	8.65526	0.103571	0.856356	0	0	11	20.8682	0.0457286	-0.32309
TGME49_224990	0	0	41	53.7556	0.018263	0	0	60	60	0.0163934	-0.155804	0	0	11	36.257	0.0268406	0	0	36	51.9315	0.0188923	-0.506617	0	0	25	47.4277	0.0206494	-0.37832
TGME49_225000	0	0	16	20.9778	0.0455005	0	0	16	16	0.0588235	0.370511	0	0	2	6.59218	0.131714	0	0	12	17.3105	0.0546134	-1.27009	0	0	11	20.8682	0.0457286	-1.52625
TGME49_225005	0	0	0	0	1	0	0	0	0	1	0	0	0	0	0	1	0	0	0	0	1	0	0	0	0	0	1	0
TGME49_225010	0	0	13	17.0444	0.0554187	0	0	31	31	0.03125	-0.826517	0	0	3	9.88827	0.091842	0	0	13	18.7531	0.0506251	-0.859301	0	0	10	18.9711	0.0500725	-0.875136
TGME49_225020	0	0	33	43.2667	0.0225904	0	0	30	30	0.0322581	0.513953	0	0	14	46.1453	0.021211	0	0	13	18.7531	0.0506251	1.25504	0	0	22	41.7363	0.0233993	0.141649
TGME49_225024	0	0	0	0	1	0	0	0	0	1	0	0	0	0	0	1	0	0	0	0	1	0	0	0	0	0	1	0
TGME49_225028	0	0	0	0	1	0	0	0	0	1	0	0	0	0	0	1	0	0	0	0	1	0	0	0	0	0	1	0
TGME49_225032	0	0	0	0	1	0	0	0	0	1	0	0	0	0	0	1	0	0	0	0	1	0	0	0	0	0	1	0
TGME49_225050	0	0	124	162.578	0.0061133	0	0	127	127	0.0078125	0.353833	0	0	53	174.693	0.00569175	0	0	109	157.237	0.00631963	0.150966	0	0	80	151.768	0.00654585	0.201708
TGME49_225060	0	0	25	32.7778	0.0296053	0	0	28	28	0.0344828	0.220022	0	0	5	16.4804	0.0572068	0	0	18	25.9658	0.0370841	-0.625387	0	0	16	30.3537	0.0318942	-0.842894
TGME49_225070	0	0	0	0	1	0	0	0	0	1	0	0	0	0	0	1	0	0	0	0	1	0	0	0	0	0	1	0
TGME49_225080	0	0	1496	1961.42	0.000509574	0	0	1998	1998	0.00050025	-0.026643	0	0	505	1664.53	0.000600411	0	0	1427	2058.51	0.000485553	-0.306323	0	0	1033	1959.71	0.000510019	-0.235399
TGME49_225090	0	0	9	11.8	0.078125	0	0	8	8	0.111111	0.508147	0	0	3	9.88827	0.091842	0	0	4	5.77017	0.147707	0.68551	0	0	8	15.1768	0.0618167	-0.571156
TGME49_225098	0	0	0	0	1	0	0	0	0	1	0	0	0	0	0	1	0	0	0	0	1	0	0	0	0	0	1	0
TGME49_225102	0	0	0	0	1	0	0	0	0	1	0	0	0	0	0	1	0	0	0	0	1	0	0	0	0	0	1	0
TGME49_225105	0	0	1	1.31111	0.432692	0	0	6	6	0.142857	-1.59877	0	0	1	3.29609	0.23277	0	0	8	11.5403	0.0797426	-1.54548	0	0	0	0	1	2.10302
TGME49_225108	0	0	16	20.9778	0.0455005	0	0	16	16	0.0588235	0.370511	0	0	2	6.59218	0.131714	1	1.44254	16	23.0807	0.101432	-0.376907	0	0	9	17.074	0.0553282	-1.25133
TGME49_225110	1	1.31111	18	23.6	0.0939476	0	0	78	78	0.0126582	-2.89178	1	3.29609	4	13.1844	0.302875	1	1.44254	15	21.6381	0.107895	-1.48909	1	1.89711	12	22.7653	0.121905	-1.31297
TGME49_225120	1	1.31111	211	276.644	0.008324	0	0	282	282	0.00353357	-1.23615	1	3.29609	103	339.497	0.0126171	0	0	220	317.359	0.0031411	-2.00604	1	1.89711	135	256.109	0.011268	-0.16315
TGME49_225125	0	0	17	22.2889	0.0429389	0	0	7	7	0.125	1.54157	0	0	11	36.257	0.0268406	0	0	3	4.32763	0.187701	2.80595	0	0	11	20.8682	0.0457286	0.768679
TGME49_225130	0	0	5	6.55556	0.132353	0	0	2	2	0.333333	1.33258	0	0	1	3.29609	0.23277	0	0	4	5.77017	0.147707	-0.656168	0	0	5	9.48553	0.0953695	-1.2873
TGME49_225140	0	0	0	0	1	0	0	0	0	1	0	0	0	0	0	1	0	0	1	1.44254	0.409409	-1.28838	0	0	0	0	1	0
TGME49_225150	0	0	125	163.889	0.00606469	0	0	146	146	0.00680272	0.165678	0	0	51	168.101	0.00591364	0	0	92	132.714	0.00747865	0.338732	0	0	88	166.945	0.00595432	0.00988968
TGME49_225160	0	0	83	108.822	0.00910563	0	0	81	81	0.0121951	0.421474	0	0	22	72.514	0.0136029	1	1.44254	50	72.1271	0.0334013	1.296	0	0	55	104.341	0.00949299	-0.518975
TGME49_225170	0	0	12	15.7333	0.059761	0	0	30	30	0.0322581	-0.889543	0	0	8	26.3687	0.0365381	0	0	26	37.5061	0.0259699	-0.49256	0	0	8	15.1768	0.0618167	0.758597
TGME49_225190	0	0	2	2.62222	0.276074	0	0	9	9	0.1	-1.46505	0	0	0	0	1	2	2.88509	16	23.0807	0.161336	-2.63186	0	0	2	3.79421	0.208585	-2.26129
TGME49_225200	0	0	40	52.4444	0.018711	0	0	31	31	0.03125	0.739968	0	0	20	65.9218	0.0149428	1	1.44254	26	37.5061	0.0634326	2.08577	0	0	23	43.6334	0.0224047	0.584351
TGME49_225210	4	5.24444	4	5.24444	1	5	5	5	5	1	0	9	29.6648	6	19.7765	1.47593	6	8.65526	1	1.44254	3.95295	1.4213	4	7.58842	1	1.89711	2.96448	1.00615
TGME49_225220	4	5.24444	21	27.5333	0.218847	5	5	22	22	0.26087	0.253404	9	29.6648	14	46.1453	0.650433	6	8.65526	8	11.5403	0.769936	0.243339	4	7.58842	11	20.8682	0.392736	-0.727838
TGME49_225230	0	0	7	9.17778	0.0982533	0	0	17	17	0.0555556	-0.822574	0	0	3	9.88827	0.091842	0	0	13	18.7531	0.0506251	-0.859301	0	0	6	11.3826	0.0807582	-0.185544
TGME49_225240	0	0	38	49.8222	0.0196764	0	0	53	53	0.0185185	-0.0874999	0	0	9	29.6648	0.0326107	0	0	35	50.489	0.0194216	-0.74768	0	0	29	55.0161	0.017852	-0.869257
TGME49_225250	0	0	17	22.2889	0.0429389	0	0	16	16	0.0588235	0.454107	0	0	5	16.4804	0.0572068	0	0	19	27.4083	0.035201	-0.700571	0	0	13	24.6624	0.0389675	-0.553913
TGME49_225260	0	0	34	44.5778	0.0219405	0	0	32	32	0.030303	0.465865	0	0	18	59.3296	0.0165756	0	0	17	24.5232	0.03918	1.24106	0	0	19	36.045	0.0269942	0.703587
TGME49_225270	0	0	12	15.7333	0.059761	0	0	4	4	0.2	1.74272	0	0	2	6.59218	0.131714	0	0	1	1.44254	0.409409	1.63613	0	0	11	20.8682	0.0457286	-1.52625
TGME49_225280	0	0	0	0	1	0	0	0	0	1	0	0	0	0	0	1	0	0	0	0	1	0	0	0	0	0	1	0
TGME49_225290	1	1.31111	12	15.7333	0.138114	2	2	13	13	0.214286	0.633674	1	3.29609	0	0	4.29609	2	2.88509	2	2.88509	1	-2.10302	1	1.89711	7	13.2797	0.202882	-4.40431
TGME49_225300	1	1.31111	46	60.3111	0.0376948	2	2	68	68	0.0434783	0.205928	1	3.29609	18	59.3296	0.0712103	2	2.88509	35	50.489	0.0754547	0.0835244	1	1.89711	28	53.119	0.0535322	-0.41168
TGME49_225310	0	0	36	47.2	0.0207469	0	0	47	47	0.0208333	0.00599874	0	0	12	39.5531	0.024659	0	0	30	43.2763	0.0225855	-0.126723	0	0	24	45.5305	0.0214913	-0.198367
TGME49_225315	0	0	0	0	1	0	0	0	0	1	0	0	0	0	0	1	0	0	0	0	1	0	0	0	0	0	1	0
TGME49_225320	0	0	37	48.5111	0.0201975	1	1	39	39	0.05	1.30775	0	0	11	36.257	0.0268406	1	1.44254	16	23.0807	0.101432	1.91802	0	0	23	43.6334	0.0224047	-0.260614
TGME49_225330	0	0	20	26.2222	0.0367347	1	1	19	19	0.1	1.44478	0	0	10	32.9609	0.0294456	1	1.44254	11	15.868	0.144804	2.29797	0	0	13	24.6624	0.0389675	0.404219
TGME49_225340	0	0	13	17.0444	0.0554187	0	0	23	23	0.0416667	-0.41148	0	0	5	16.4804	0.0572068	0	0	13	18.7531	0.0506251	-0.176334	0	0	8	15.1768	0.0618167	0.111811
TGME49_225350	0	0	22	28.8444	0.0335071	0	0	19	19	0.05	0.577462	0	0	12	39.5531	0.024659	0	0	19	27.4083	0.035201	0.513498	0	0	14	26.5595	0.0362851	0.557262
TGME49_225360	0	0	4	5.24444	0.160142	0	0	3	3	0.25	0.642573	0	0	2	6.59218	0.131714	0	0	2	2.88509	0.257395	0.966568	0	0	2	3.79421	0.208585	0.66322
TGME49_225370	0	0	0	0	1	0	0	0	0	1	0	0	0	0	0	1	0	0	0	0	1	0	0	0	0	0	1	0
TGME49_225380	0	0	5	6.55556	0.132353	0	0	5	5	0.166667	0.332575	0	0	2	6.59218	0.131714	0	0	6	8.65526	0.103571	-0.346801	0	0	4	7.58842	0.116436	-0.17788
TGME49_225400	0	0	0	0	1	0	0	0	0	1	0	0	0	0	0	1	0	0	0	0	1	0	0	0	0	0	1	0
TGME49_225410	0	0	12	15.7333	0.059761	0	0	24	24	0.04	-0.579203	0	0	5	16.4804	0.0572068	0	0	18	25.9658	0.0370841	-0.625387	0	0	9	17.074	0.0553282	-0.0481702
TGME49_225413	0	0	0	0	1	0	0	0	0	1	0	0	0	0	0	1	0	0	0	0	1	0	0	0	0	0	1	0
TGME49_225420	0	0	25	32.7778	0.0296053	0	0	34	34	0.0285714	-0.0512805	0	0	16	52.7374	0.018609	0	0	23	33.1785	0.0292582	0.652839	0	0	17	32.2508	0.0300745	0.692538
TGME49_225430	0	0	0	0	1	0	0	2	2	0.333333	-1.58496	0	0	1	3.29609	0.23277	0	0	1	1.44254	0.409409	0.81464	0	0	0	0	1	2.10302
TGME49_225435	0	0	0	0	1	0	0	3	3	0.25	-2	0	0	1	3.29609	0.23277	0	0	0	0	1	2.10302	0	0	0	0	1	2.10302
TGME49_225440	0	0	2	2.62222	0.276074	0	0	3	3	0.25	-0.143125	0	0	2	6.59218	0.131714	0	0	2	2.88509	0.257395	0.966568	0	0	2	3.79421	0.208585	0.66322
TGME49_225450	0	0	4	5.24444	0.160142	0	0	14	14	0.0666667	-1.26432	0	0	1	3.29609	0.23277	0	0	10	14.4254	0.064828	-1.84421	0	0	1	1.89711	0.345172	0.568411
TGME49_225460	0	0	0	0	1	0	0	0	0	1	0	0	0	0	0	1	0	0	0	0	1	0	0	0	0	0	1	0
TGME49_225470	0	0	33	43.2667	0.0225904	0	0	35	35	0.0277778	0.298224	0	0	16	52.7374	0.018609	0	0	36	51.9315	0.0188923	0.0217997	0	0	20	37.9421	0.0256791	0.464596
TGME49_225480	0	0	8	10.4889	0.0870406	0	0	12	12	0.0769231	-0.178272	0	0	5	16.4804	0.0572068	0	0	1	1.44254	0.409409	2.83929	0	0	5	9.48553	0.0953695	0.737342
TGME49_225490	0	0	49	64.2444	0.015327	0	0	82	82	0.0120482	-0.347256	0	0	30	98.8827	0.0100117	0	0	43	62.0293	0.0158656	0.664211	0	0	33	62.6045	0.0157222	0.651106
TGME49_225500	0	0	8	10.4889	0.0870406	0	0	26	26	0.037037	-1.23272	0	0	5	16.4804	0.0572068	0	0	15	21.6381	0.0441732	-0.373013	0	0	5	9.48553	0.0953695	0.737342
TGME49_225510	0	0	23	30.1556	0.032097	2	2	46	46	0.0638298	0.991791	0	0	15	49.4413	0.019825	3	4.32763	52	75.0122	0.0700891	1.82187	0	0	11	20.8682	0.0457286	1.20577
TGME49_225520	0	0	1	1.31111	0.432692	2	2	4	4	0.6	0.471621	0	0	0	0	1	3	4.32763	2	2.88509	1.3713	0.455547	0	0	0	0	1	0
TGME49_225530	0	0	26	34.0889	0.0284991	0	0	46	46	0.0212766	-0.421646	0	0	17	56.0335	0.0175335	0	0	27	38.9487	0.0250321	0.513663	0	0	17	32.2508	0.0300745	0.778421
TGME49_225540	0	0	34	44.5778	0.0219405	0	0	59	59	0.0166667	-0.396632	0	0	18	59.3296	0.0165756	0	0	40	57.7017	0.0170353	0.0394637	0	0	24	45.5305	0.0214913	0.374688
TGME49_225550	0	0	34	44.5778	0.0219405	0	0	39	39	0.025	0.188331	0	0	11	36.257	0.0268406	0	0	26	37.5061	0.0259699	-0.0475766	0	0	23	43.6334	0.0224047	-0.260614
TGME49_225555	0	0	394	516.578	0.00193208	0	0	520	520	0.00191939	-0.0095077	0	0	139	458.156	0.00217791	0	0	380	548.166	0.00182094	-0.258257	0	0	270	512.219	0.00194849	-0.160588
TGME49_225560	0	0	132	173.067	0.00574493	1	1	162	162	0.0122699	1.09477	0	0	65	214.246	0.00464585	2	2.88509	101	145.697	0.0264838	2.51109	0	0	89	168.842	0.00588781	0.341788
TGME49_225570	0	0	0	0	1	1	1	2	2	0.666667	-0.584963	0	0	0	0	1	2	2.88509	2	2.88509	1	0	0	0	0	0	1	0
TGME49_225580	0	0	32	41.9556	0.0232799	0	0	39	39	0.025	0.102845	0	0	12	39.5531	0.024659	0	0	32	46.1614	0.0212038	-0.217794	0	0	22	41.7363	0.0233993	-0.0756519
TGME49_225590	0	0	0	0	1	0	0	0	0	1	0	0	0	0	0	1	0	0	0	0	1	0	0	0	0	0	1	0
TGME49_225680	0	0	42	55.0667	0.0178359	0	0	47	47	0.0208333	0.224109	0	0	19	62.6257	0.0157169	0	0	37	53.3741	0.0183911	0.22669	0	0	34	64.5016	0.0152668	-0.0419207
TGME49_225690	0	0	50	65.5556	0.015025	0	0	50	50	0.0196078	0.384062	0	0	28	92.2905	0.0107192	0	0	25	36.0636	0.0269807	1.33173	0	0	34	64.5016	0.0152668	0.5102
TGME49_225710	0	0	9	11.8	0.078125	0	0	16	16	0.0588235	-0.409391	0	0	3	9.88827	0.091842	0	0	8	11.5403	0.0797426	-0.203802	0	0	9	17.074	0.0553282	-0.731138
TGME49_225720	0	0	6	7.86667	0.112782	0	0	11	11	0.0833333	-0.436571	0	0	2	6.59218	0.131714	0	0	10	14.4254	0.064828	-1.02272	0	0	3	5.69132	0.149447	0.182223
TGME49_225730	0	0	58	76.0444	0.0129795	0	0	97	97	0.0102041	-0.347091	0	0	13	42.8492	0.0228055	0	0	71	102.421	0.00966926	-1.2379	0	0	40	75.8842	0.0130066	-0.810139
TGME49_225745	0	0	7	9.17778	0.0982533	0	0	5	5	0.166667	0.762388	0	0	3	9.88827	0.091842	0	0	1	1.44254	0.409409	2.15632	0	0	3	5.69132	0.149447	0.702412
TGME49_225770	0	0	5	6.55556	0.132353	0	0	5	5	0.166667	0.332575	0	0	5	16.4804	0.0572068	0	0	5	7.21271	0.121762	1.08981	0	0	4	7.58842	0.116436	1.02528
TGME49_225780	0	0	15	19.6667	0.0483871	0	0	10	10	0.0909091	0.909802	0	0	6	19.7765	0.0481312	0	0	5	7.21271	0.121762	1.33902	0	0	9	17.074	0.0553282	0.201043
TGME49_225790	0	0	37	48.5111	0.0201975	0	0	60	60	0.0163934	-0.301057	0	0	15	49.4413	0.019825	0	0	16	23.0807	0.0415271	1.06673	0	0	27	51.2219	0.0191491	-0.0500474
TGME49_225800	0	0	15	19.6667	0.0483871	0	0	11	11	0.0833333	0.784271	0	0	7	23.0726	0.041541	0	0	9	12.9829	0.071516	0.783731	0	0	9	17.074	0.0553282	0.413481
TGME49_225810	0	0	26	34.0889	0.0284991	0	0	36	36	0.027027	-0.076511	0	0	9	29.6648	0.0326107	0	0	28	40.3912	0.0241597	-0.43274	0	0	19	36.045	0.0269942	-0.272696
TGME49_225820	0	0	14	18.3556	0.0516648	0	0	12	12	0.0769231	0.574236	0	0	6	19.7765	0.0481312	0	0	15	21.6381	0.0441732	-0.1238	0	0	11	20.8682	0.0457286	-0.0738772
TGME49_225830	0	0	11	14.4222	0.0648415	0	0	16	16	0.0588235	-0.140524	0	0	5	16.4804	0.0572068	0	0	11	15.868	0.059284	0.0514557	0	0	7	13.2797	0.0700293	0.291772
TGME49_225840	0	0	8	10.4889	0.0870406	0	0	9	9	0.1	0.200239	0	0	2	6.59218	0.131714	0	0	2	2.88509	0.257395	0.966568	0	0	5	9.48553	0.0953695	-0.465814
TGME49_225850	0	0	17	22.2889	0.0429389	0	0	19	19	0.05	0.219642	0	0	7	23.0726	0.041541	0	0	13	18.7531	0.0506251	0.285318	0	0	11	20.8682	0.0457286	0.138561
TGME49_225860	0	0	28	36.7111	0.0265174	0	0	33	33	0.0294118	0.149455	0	0	15	49.4413	0.019825	0	0	20	28.8509	0.0334999	0.756834	0	0	20	37.9421	0.0256791	0.373275
TGME49_225870	0	0	30	39.3333	0.0247934	0	0	24	24	0.04	0.690045	0	0	3	9.88827	0.091842	0	0	12	17.3105	0.0546134	-0.749898	0	0	21	39.8392	0.0244863	-1.90718
TGME49_225880	0	0	15	19.6667	0.0483871	0	0	24	24	0.04	-0.274622	0	0	13	42.8492	0.0228055	0	0	16	23.0807	0.0415271	0.864673	0	0	10	18.9711	0.0500725	1.13464
TGME49_225890	0	0	10	13.1111	0.0708661	0	0	7	7	0.125	0.81876	0	0	5	16.4804	0.0572068	0	0	9	12.9829	0.071516	0.32208	0	0	5	9.48553	0.0953695	0.737342
TGME49_225900	0	0	9	11.8	0.078125	0	0	10	10	0.0909091	0.21864	0	0	1	3.29609	0.23277	0	0	2	2.88509	0.257395	0.145078	0	0	8	15.1768	0.0618167	-1.91283
TGME49_225905	0	0	2	2.62222	0.276074	0	0	0	0	1	1.85688	0	0	0	0	1	0	0	0	0	1	0	0	0	2	3.79421	0.208585	-2.26129
TGME49_225910	0	0	2	2.62222	0.276074	0	0	13	13	0.0714286	-1.95048	0	0	0	0	1	0	0	5	7.21271	0.121762	-3.03786	0	0	2	3.79421	0.208585	-2.26129
TGME49_225920	0	0	4	5.24444	0.160142	0	0	8	8	0.111111	-0.527352	0	0	2	6.59218	0.131714	0	0	7	10.0978	0.090108	-0.547688	0	0	4	7.58842	0.116436	-0.17788
TGME49_225930	0	0	150	196.667	0.00505902	0	0	235	235	0.00423729	-0.255717	0	0	55	181.285	0.00548592	0	0	167	240.905	0.00413386	-0.408243	0	0	105	199.196	0.0049951	-0.135219
TGME49_225940	0	0	63	82.6	0.0119617	0	0	68	68	0.0144928	0.276907	0	0	24	79.1061	0.0124834	0	0	56	80.7824	0.0122276	-0.0298774	0	0	44	83.4727	0.0118381	-0.0765717
TGME49_225950	0	0	0	0	1	0	0	0	0	1	0	0	0	0	0	1	0	0	0	0	1	0	0	0	0	0	1	0
TGME49_225953	0	0	0	0	1	0	0	0	0	1	0	0	0	0	0	1	0	0	0	0	1	0	0	0	0	0	1	0
TGME49_225955	0	0	0	0	1	0	0	0	0	1	0	0	0	0	0	1	0	0	0	0	1	0	0	0	0	0	1	0
[truncated: 6,926 more rows]

## Sheet: Genes with readthroughs
METTL before check	METTL only initiating gene				CPSF3 before check		CPSF only initiating gene
TGME49_295105	TGME49_201170				TGME49_295105		TGME49_200010
TGME49_250710	TGME49_203310				TGME49_250710		TGME49_201400
TGME49_313640	TGME49_204045				TGME49_319350		TGME49_202200
TGME49_227620	TGME49_204310				TGME49_239770		TGME49_203310
TGME49_259630	TGME49_204400				TGME49_204315		TGME49_204045
TGME49_319350	TGME49_205010				TGME49_210412		TGME49_204110
TGME49_319340	TGME49_205240				TGME49_209410		TGME49_204310
TGME49_203310	TGME49_205710				TGME49_239760		TGME49_204315
TGME49_205690	TGME49_209420				TGME49_311110		TGME49_204330
TGME49_214400	TGME49_210230				TGME49_319340		TGME49_204400
TGME49_308093	TGME49_214400				TGME49_249860		TGME49_205010
TGME49_273310	TGME49_215350				TGME49_266920		TGME49_205240
TGME49_275630	TGME49_215980				TGME49_313640		TGME49_205710
TGME49_239770	TGME49_216275				TGME49_205690		TGME49_208842
TGME49_224700	TGME49_217900				TGME49_233460		TGME49_208980
TGME49_240600	TGME49_219170				TGME49_310030		TGME49_209420
TGME49_237020	TGME49_220640				TGME49_273310		TGME49_210255
TGME49_235635	TGME49_224700				TGME49_294970		TGME49_210412
TGME49_272650	TGME49_226705				TGME49_250730		TGME49_211850
TGME49_310770	TGME49_227620				TGME49_271050		TGME49_211870
TGME49_310790	TGME49_230122				TGME49_232280		TGME49_213350
TGME49_286210	TGME49_231992				TGME49_275630		TGME49_213415
TGME49_204045	TGME49_232030				TGME49_309760		TGME49_214400
TGME49_235630	TGME49_233430				TGME49_228480		TGME49_215350
TGME49_300000	TGME49_234505				TGME49_226710		TGME49_215490
TGME49_209420	TGME49_235630				TGME49_310020		TGME49_215890
TGME49_231990	TGME49_236040				TGME49_311810		TGME49_215980
TGME49_236040	TGME49_237020				TGME49_310790		TGME49_216050
TGME49_239790	TGME49_239770				TGME49_268920		TGME49_216275
TGME49_310020	TGME49_239790				TGME49_313910		TGME49_217450
TGME49_204400	TGME49_240600				TGME49_301355		TGME49_219720
TGME49_237015	TGME49_242118				TGME49_203310		TGME49_220640
TGME49_239760	TGME49_244070				TGME49_233450		TGME49_220890
TGME49_248400	TGME49_245432				TGME49_219730		TGME49_222910
TGME49_310030	TGME49_247530				TGME49_290210		TGME49_224700
TGME49_254030	TGME49_248280				TGME49_205010		TGME49_225210
TGME49_234505	TGME49_248420				TGME49_201390		TGME49_225510
TGME49_249860	TGME49_249870				TGME49_265380		TGME49_226040
TGME49_249870	TGME49_250115				TGME49_204110		TGME49_226705
TGME49_204310	TGME49_250710				TGME49_205020		TGME49_226860
TGME49_240630	TGME49_250730				TGME49_208842		TGME49_227280
TGME49_266920	TGME49_250930				TGME49_310780		TGME49_227570
TGME49_226705	TGME49_254030				TGME49_248400		TGME49_227620
TGME49_204040	TGME49_255215				TGME49_240560		TGME49_227980
TGME49_295110	TGME49_259630				TGME49_248420		TGME49_228480
TGME49_305520	TGME49_261710				TGME49_249390		TGME49_230122
TGME49_310780	TGME49_263500				TGME49_286590		TGME49_230870
TGME49_304740	TGME49_264710				TGME49_314550		TGME49_231080
TGME49_250930	TGME49_266675				TGME49_310770		TGME49_231992
TGME49_215970	TGME49_266920				TGME49_228490		TGME49_232030
TGME49_275640	TGME49_268760				TGME49_227620		TGME49_232270
TGME49_264710	TGME49_272650				TGME49_249870		TGME49_232750
TGME49_232030	TGME49_273310				TGME49_222910		TGME49_233390
TGME49_232035	TGME49_273830				TGME49_224700		TGME49_233430
TGME49_231992	TGME49_275630				TGME49_250930		TGME49_233925
TGME49_250730	TGME49_275750				TGME49_227580		TGME49_234505
TGME49_226710	TGME49_286200				TGME49_210255		TGME49_235630
TGME49_288600	TGME49_288020				TGME49_309740		TGME49_236040
TGME49_215980	TGME49_288600				TGME49_308840		TGME49_236140
TGME49_294805	TGME49_290740				TGME49_237015		TGME49_237020
TGME49_250115	TGME49_294805				TGME49_227280		TGME49_237250
TGME49_233450	TGME49_294970				TGME49_214410		TGME49_239770
TGME49_205250	TGME49_295110				TGME49_236040		TGME49_239790
TGME49_275750	TGME49_300000				TGME49_217450		TGME49_240560
TGME49_255215	TGME49_304680				TGME49_268910		TGME49_240600
TGME49_264700	TGME49_304740				TGME49_226030		TGME49_241610
TGME49_273815	TGME49_305520				TGME49_313930		TGME49_244070
TGME49_215350	TGME49_308093				TGME49_209420		TGME49_244105
TGME49_314550	TGME49_310030				TGME49_294805		TGME49_246710
TGME49_286200	TGME49_310780				TGME49_267500		TGME49_246730
TGME49_205700	TGME49_310790				TGME49_304740		TGME49_247530
TGME49_210230	TGME49_313640				TGME49_308093		TGME49_248270
TGME49_247520					TGME49_317720		TGME49_248420
TGME49_217890	TGME49_313670				TGME49_211850		TGME49_249390
TGME49_294970	TGME49_314550				TGME49_289000		TGME49_249870
TGME49_214410	TGME49_316220				TGME49_204040		TGME49_250115
TGME49_244080	TGME49_319350				TGME49_311100		TGME49_250710
TGME49_316220					TGME49_278530		TGME49_250730
TGME49_313670					TGME49_216050		TGME49_250930
TGME49_313660					TGME49_237250		TGME49_254030
TGME49_304680					TGME49_226705		TGME49_254335
TGME49_290740					TGME49_321690		TGME49_254630
TGME49_288020					TGME49_204310		TGME49_254915
TGME49_273830					TGME49_204045		TGME49_255215
TGME49_268760					TGME49_235635		TGME49_258618
TGME49_266900					TGME49_213350		TGME49_259530
TGME49_266675					TGME49_276940		TGME49_259630
TGME49_263500					TGME49_239790		TGME49_261600
TGME49_261710					TGME49_272650		TGME49_262720
TGME49_259620					TGME49_240630		TGME49_263170
TGME49_248280					TGME49_289920		TGME49_263500
TGME49_245432					TGME49_248270		TGME49_264460
TGME49_242118					TGME49_237260		TGME49_264710
TGME49_231991					TGME49_306330		TGME49_265380
TGME49_230122					TGME49_210408		TGME49_266675
TGME49_220640					TGME49_215490		TGME49_266920
TGME49_219170					TGME49_227970		TGME49_267060
TGME49_217900					TGME49_202200		TGME49_267500
TGME49_216275					TGME49_235630		TGME49_267970
TGME49_216270					TGME49_261600		TGME49_268340
TGME49_205710					TGME49_286210		TGME49_268760
TGME49_205240					TGME49_265370		TGME49_268920
TGME49_205010					TGME49_234505		TGME49_269442
TGME49_201170					TGME49_294808		TGME49_270250
					TGME49_268350		TGME49_270655
					TGME49_261590		TGME49_271050
					TGME49_215890		TGME49_272650
					TGME49_232750		TGME49_273310
					TGME49_313660		TGME49_275630
					TGME49_232270		TGME49_275770
					TGME49_234507		TGME49_275870
					TGME49_204395		TGME49_276940
					TGME49_241610		TGME49_277260
					TGME49_214400		TGME49_278530
					TGME49_220870		TGME49_285930
					TGME49_276930		TGME49_286200
					TGME49_286570		TGME49_286530
					TGME49_215885		TGME49_286590
					TGME49_248390		TGME49_286730
					TGME49_219720		TGME49_288010
					TGME49_295472		TGME49_288600
					TGME49_227570		TGME49_289000
					TGME49_247520		TGME49_289920
					TGME49_288020		TGME49_290210
					TGME49_289910		TGME49_293780
					TGME49_226860		TGME49_294700
					TGME49_240600		TGME49_294805
					TGME49_233470		TGME49_294970
					TGME49_244110		TGME49_295110
					TGME49_259630		TGME49_295472
					TGME49_261570		TGME49_297070
					TGME49_227290		TGME49_297400
					TGME49_204400		TGME49_299990
					TGME49_231080		TGME49_300000
					TGME49_247530		TGME49_300055
					TGME49_286530		TGME49_301355
					TGME49_208830		TGME49_304740
					TGME49_261540		TGME49_306330
					TGME49_264710		TGME49_308093
					TGME49_200010		TGME49_308840
					TGME49_237020		TGME49_309160
					TGME49_258618		TGME49_309760
					TGME49_270650		TGME49_310030
					TGME49_259530		TGME49_310045
					TGME49_267060		TGME49_310230
					TGME49_246730		TGME49_310780
					TGME49_269442		TGME49_310790
					TGME49_216270		TGME49_311100
					TGME49_264700		TGME49_311155
					TGME49_254630		TGME49_311810
					TGME49_220890		TGME49_313318
					TGME49_236140		TGME49_313640
					TGME49_266900		TGME49_313910
					TGME49_231990		TGME49_314550
					TGME49_294700		TGME49_316220
					TGME49_297400		TGME49_317705
					TGME49_226040		TGME49_318510
					TGME49_240540		TGME49_319350
					TGME49_233480		TGME49_321690
					TGME49_286560
					TGME49_275870
					TGME49_269438
					TGME49_311815
					TGME49_294780
					TGME49_300000
					TGME49_222920
					TGME49_244080
					TGME49_254340
					TGME49_317705
					TGME49_227980
					TGME49_299990
					TGME49_225510
					TGME49_230122
					TGME49_270250
					TGME49_275640
					TGME49_267490
					TGME49_205240
					TGME49_204330
					TGME49_233925
					TGME49_313322
					TGME49_244070
					TGME49_264460
					TGME49_205250
					TGME49_211870
					TGME49_208980
					TGME49_232035
					TGME49_250115
					TGME49_318510
					TGME49_311150
					TGME49_232030
					TGME49_236150
					TGME49_211860
					TGME49_231992
					TGME49_246710
					TGME49_255210
					TGME49_216275
					TGME49_268760
					TGME49_210260
					TGME49_263170
					TGME49_254030
					TGME49_293790
					TGME49_215970
					TGME49_285930
					TGME49_205700
					TGME49_225210
					TGME49_267970
					TGME49_300055
					TGME49_226870
					TGME49_294790
					TGME49_201400
					TGME49_286735
					TGME49_255215
					TGME49_213415
					TGME49_254335
					TGME49_220640
					TGME49_215350
					TGME49_295110
					TGME49_311155
					TGME49_233390
					TGME49_230118
					TGME49_270655
					TGME49_263500
					TGME49_215980
					TGME49_205710
					TGME49_316220
					TGME49_310045
					TGME49_275770
					TGME49_309160
					TGME49_310230
					TGME49_297070
					TGME49_233430
					TGME49_268340
					TGME49_244105
					TGME49_262720
					TGME49_286730
					TGME49_288010
					TGME49_288600
					TGME49_232740
					TGME49_272645
					TGME49_254915
					TGME49_313318
					TGME49_230870
					TGME49_293780
					TGME49_277260
					TGME49_266675
