# Supplementary material for: A plant-like mechanism coupling m6A reading to polyadenylation safeguards transcriptome integrity and developmental gene partitioning in Toxoplasma
Source: eLife. 2021 Jul 15;10:e68312. doi: 10.7554/eLife.68312 (PMC8313237; doi:10.7554/eLife.68312)
Supplement: Supplementary file 1. — Mass spectrometry-based proteomic analysis of Flag elution identified CPSF1, WDR33, Fip1, PAP, METTL3, METTL14, and WTAP and their partners. The identities of the proteins (accession number on ToxoDB, gene name, and description) are indicated. For each protein, MaxQuant reports an intensity-based absolute quantification (iBAQ) value, a measure of protein abundance. [file elife-68312-supp1.xlsx]

## Sheet: CPSF1-data
accession	protein name	gene name	molecular weight	identified peptides	coverage	CPSF1-Band1		CPSF1-Band2		CPSF1-Band3		CPSF1-Band4		CPSF1-Band5		CPSF1-Band6		CPSF1-Band7		CPSF1-Band8		CPSF1-Band9
						quantified peptides count	iBAQ	quantified peptides count	iBAQ	quantified peptides count	iBAQ	quantified peptides count	iBAQ	quantified peptides count	iBAQ	quantified peptides count	iBAQ	quantified peptides count	iBAQ	quantified peptides count	iBAQ	quantified peptides count	iBAQ
TGME49_224280-t26_1-p1	CPSF A subunit region protein	TGME49_224280	301891	114	41.8	93	1.24178e+07	80	4.85963e+06	73	4.85723e+06	62	2.58549e+06	38	537147	33	578023	30	504206	22	250314	11	30369
TGME49_230010-t26_1-p1	hypothetical protein	TGME49_230010	140376	61	46.25	25	1.38241e+06	26	2.09003e+06	52	3.5249e+07	28	6.77149e+06	33	1.59732e+06	24	1.13781e+06	13	608491	4	110021	2	9044.68
TGME49_285200-t26_1-p1	cleavage and polyadenylation specifity factor protein	TGME49_285200	116743	65	58.43	27	831394	21	476309	28	1.91719e+06	57	2.771e+07	21	632074	21	1.14132e+06	10	114950	12	561032	2	21320.1
TGME49_247330-t26_1-p1	hypothetical protein	TGME49_247330	204455	96	50.4	64	1.70482e+06	87	1.82352e+07	70	6.43089e+06	35	424423	9	36162.8	9	41260.6	10	184282	23	734929	6	15982.4
TGME49_294700-t26_1-p1	polynucleotide 5'-hydroxyl-kinase	TGME49_294700	73663	42	49.27	10	167208	6	126895	8	211704	8	111728	41	23140894	21	1.98295e+06	2	22270.3	7	166922	11	351368
TGME49_219440-t26_1-p1	hypothetical protein	TGME49_219440	181402	71	47.57	34	867472	62	1.65983e+07	44	4.0724e+06	37	1.92535e+06	20	236242	18	242449	13	163973	9	74912.3	1	442.176
TGME49_283740-t26_1-p1	RNA recognition motif-containing protein	TGME49_283740	64433	27	43.9	7	204315	7	275181	7	252042	3	149361	12	446866	19	1.32929e+07	9	1.93924e+06	13	887046	7	81187.2
TGME49_201200-t26_1-p1	zinc finger (CCCH type) motif-containing protein	TGME49_201200	68065	18	27.97	2	26484.2	1	12830.6	4	111811	1	28495.3	8	418124	18	1.15838e+07	1	14015.1			3	203878
TGME49_261960-t26_1-p1	hypothetical protein	TGME49_261960	129369	45	42.22	24	491907	19	405720	34	9.2432e+06	24	846278	20	498404	14	278785	6	58063.1	12	196235	8	97121.8
TGME49_254210-t26_1-p1	RNA recognition motif-containing protein	TGME49_254210	114336	27	33.3	12	148144	9	126434	18	1.17845e+06	22	4.3567e+06	11	451195	5	49057.6	4	54845.3	9	780661	2	3523.03
TGME49_268250-t26_1-p1	WD domain, G-beta repeat-containing protein	TGME49_268250	59896	16	44.42	3	47589.6	2	30969.3	3	93381.3	3	115298	2	17243.5	2	52375.5	11	4.65042e+06	11	945599
TGME49_230230-t26_1-p1	hypothetical protein	TGME49_230230	29857	8	35.36	1	5347.75	1	5962.22			2	14254.8									7	490201
TGME49_247550-t26_1-p1	heat shock protein HSP60	TGME49_247550	60914	53	73.39	9	283935	16	529361	20	1.16054e+06	18	874081	11	386725	20	2.88308e+06	48	8.48917e+07	5	73015
TGME49_240600-t26_1-p1	chaperonin cpn60, putative	TGME49_240600	72237	29	36.88	1	13252.8	1	10385.9	4	82157.2	6	92675.2	1	54184	25	1.14619e+07	20	2.22417e+06	1	34418.2
TGME49_311720-t26_1-p1	chaperonin protein BiP	TGME49_311720	73253	38	45.36									32	8.61204e+06	18	1.59422e+06
TGME49_273760-t26_1-p1	heat shock protein HSP70	TGME49_273760	72880	45	50	1	9606.28	2	15828.5	4	63750.8	2	28681.6	27	4.13475e+06	31	4971584
TGME49_286420-t26_1-p1	elongation factor 1-alpha (EF-1-ALPHA), putative	TGME49_286420	49006	37	60.27	1	5081.19	2	31399.6	2	62790.6	2	76079.4			3	26054.4	1	43895.1	37	8.81513e+06
TGME49_233220-t26_1-p1	hypothetical protein	TGME49_233220	159704	49	29.34	12	63714.8	9	78399.9	37	2.4365e+06	27	663452	24	361225	29	1.4586e+06	14	184058	14	48125.2	1	8656.34
TGME49_226960-t26_1-p1	phosphofructokinase PFKII	TGME49_226960	131362	44	32.98	2	12062.5	3	15071.2	20	505973	38	3.67171e+06
TGME49_266960-t26_1-p1	beta tubulin	TGME49_266960	50073	32	56.35											1	4658.2	2	13883	31	4.06302e+06
TGME49_290950-t26_1-p1	clathrin heavy chain, putative	TGME49_290950	194503	69	39.4	18	80750.7	22	163984	66	3.81477e+06
TGME49_316400-t26_1-p1	alpha tubulin TUBA1	TGME49_316400	50114	18	48.12									1	4651.94	1	3589.92	1	32234.1	18	2.90547e+06
TGME49_232410-t26_1-p1	PDI family protein	TGME49_232410	24909	16	55.91																	16	2.90969e+06
TGME49_211680-t26_1-p1	protein disulfide isomerase	TGME49_211680	52802	29	52.87							1	7560.78					1	6535.57	28	2.57791e+06
TGME49_238070-t26_1-p1	glutaredoxin domain-containing protein	TGME49_238070	26165	12	49.16	1	372200	1	151852	1	204341	1	76386.2									11	1.23701e+06
TGME49_239100-t26_1-p1	ribosomal protein RPS7	TGME49_239100	22588	13	58.67																	12	1.97877e+06
TGME49_232940-t26_1-p1	heat shock protein HSP20	TGME49_232940	20266	8	40.54																	7	1.95663e+06
TGME49_257090-t26_1-p1	NAC domain-containing protein	TGME49_257090	38782	12	28.69																	12	1805872
TGME49_266460-t26_1-p1	small ubiquitin family modifier, putative	TGME49_266460	10319	3	27.47	2	273033	3	807878	1	680967
TGME49_208030-t26_1-p1	microneme protein MIC4	TGME49_208030	63021	11	18.97											5	328896	11	1.24839e+06
TGME49_266640-t26_1-p1	Acetyl-coenzyme A synthetase 2, putative	TGME49_266640	79991	26	36.97									26	1.47594e+06	8	64478.1
TGME49_232250-t26_1-p1	catalase	TGME49_232250	57298	14	27.29													12	1.52786e+06
TGME49_244200-t26_1-p1	2-oxoglutarate dehydrogenase e1 component, mitochondrial precursor, putative	TGME49_244200	124265	33	36.74							32	1.46866e+06
TGME49_231630-t26_1-p1	alveolin domain containing intermediate filament IMC4	TGME49_231630	50172	7	19.03													6	1.38974e+06			2	36341.1
TGME49_251780-t26_1-p1	heat shock protein	TGME49_251780	78251	27	38.19									13	296845	20	1.05142e+06
TGME49_270510-t26_1-p1	asparaginyl-tRNA synthetase (NOB+tRNA synthase)	TGME49_270510	75005	18	25.74													17	1.33171e+06
TGME49_290670-t26_1-p1	leucyl aminopeptidase LAP	TGME49_290670	83237	23	29.19											1	3023.09	23	1.31676e+06
TGME49_259550-t26_1-p1	dihydropteroate synthase	TGME49_259550	82685	15	20.59	1	4573.67							14	1.2292e+06			3	34359.4
TGME49_220950-t26_1-p1	hypothetical protein	TGME49_220950	38556	4	7.99															4	1.15852e+06
TGME49_308090-t26_1-p1	rhoptry protein ROP5	TGME49_308090	61102	11	22.04													8	1.00012e+06	4	127247
TGME49_277270-t26_1-p1	NTPase II	TGME49_277270	37376	8	24.32											3	130949	6	996081
TGME49_299050-t26_1-p1	ribosomal protein RPL17	TGME49_299050	22269	8	27.69																	8	1.1135e+06
TGME49_215470-t26_1-p1	ribosomal protein RPL10A	TGME49_215470	24603	10	36.41																	10	1.06869e+06
TGME49_283850-t26_1-p1	peptidyl-prolyl cis-trans isomerase	TGME49_283850	55589	12	23.66											1	23454.5	11	973411
TGME49_288360-t26_1-p1	tryptophanyl-tRNA synthetase (TrpRS2)	TGME49_288360	77058	22	29.03									3	30575.5	20	961796
TGME49_316310-t26_1-p1	superoxide dismutase	TGME49_316310	22551	4	19.9																	4	989187
TGME49_311240-t26_1-p1	DnaJ family chaperone, putative	TGME49_311240	47449	17	37.56															15	903968
TGME49_243710-t26_1-p1	t-complex protein beta subunit	TGME49_243710	61473	21	40.49													20	892798
TGME49_232340-t26_1-p1	protein phosphatase 2C domain-containing protein	TGME49_232340	59868	12	22.34											3	277690	9	604253
TGME49_239820-t26_1-p1	D-3-phosphoglycerate dehydrogenase	TGME49_239820	65194	16	24.67									1	2302.31	16	863409	2	11654.5
TGME49_231640-t26_1-p1	alveolin domain containing intermediate filament IMC1	TGME49_231640	69596	12	23.65									12	875073
TGME49_230450-t26_1-p1	bifunctional GMP synthase/glutamine amidotransferase protein	TGME49_230450	62295	11	21.97							2	12662.7					11	796783
TGME49_249180-t26_1-p1	bifunctional dihydrofolate reductase-thymidylate synthase	TGME49_249180	68752	16	28.2											16	805050
TGME49_238050-t26_1-p1	nuclease and tudor domain-containing protein	TGME49_238050	104042	29	34.75							27	796729
TGME49_253430-t26_1-p1	asparagine synthetase, putative	TGME49_253430	65868	11	17.52													9	766171
TGME49_273460-t26_1-p1	eukaryotic translation initiation factor 3 subunit 6 interacting protein	TGME49_273460	75074	21	36.93									8	262923	16	476421
TGME49_309210-t26_1-p1	peroxiredoxin 6, putative	TGME49_309210	44036	10	20.4																	10	730086
TGME49_251500-t26_1-p1	eukaryotic initiation factor-3, subunit 3, putative	TGME49_251500	65714	16	24.83															16	722963
TGME49_248340-t26_1-p1	GTP-binding nuclear protein ran/tc4	TGME49_248340	25998	9	45.41																	9	716591
TGME49_262620-t26_1-p1	RNA recognition motif-containing protein	TGME49_262620	31760	12	49.15																	12	692800
TGME49_273520-t26_1-p1	PCI domain-containing protein	TGME49_273520	67341	20	34.11											2	12245.8	16	665275
TGME49_205440-t26_1-p1	CCT chaperonin gamma subunit	TGME49_205440	60613	19	34.89													16	675806
TGME49_201680-t26_1-p1	eukaryotic initiation factor-3 subunit 10, putative	TGME49_201680	119127	27	26.82							26	671440
TGME49_265450-t26_1-p1	hexokinase	TGME49_265450	51498	8	22.01													1	1008.39	8	661948
TGME49_202260-t26_1-p1	hypothetical protein	TGME49_202260	30532	1	3.23	1	46726.2									1	613857
TGME49_215775-t26_1-p1	rhoptry protein ROP8	TGME49_215775	65913	7	9.57															7	650307
TGME49_214080-t26_1-p1	toxofilin	TGME49_214080	26789	4	13.99																	4	649449
TGME49_221620-t26_1-p1	beta-tubulin, putative	TGME49_221620	50037	29	54.34															7	604549
TGME49_290660-t26_1-p1	RNA recognition motif-containing protein	TGME49_290660	48395	9	17.94															9	594272
TGME49_310010-t26_1-p1	rhoptry neck protein RON1	TGME49_310010	127433	17	18.57									3	14674.8	6	108462	12	470484
TGME49_289530-t26_1-p1	ribosomal protein RPL19	TGME49_289530	22160	7	26.74																	7	589795
TGME49_280600-t26_1-p1	histidyl-tRNA synthetase (HisRS), putative	TGME49_280600	134876	24	20.77					1	2350.49	23	569311
TGME49_312600-t26_1-p1	heat shock protein HSP21	TGME49_312600	21279	9	37.44																	9	571320
TGME49_223410-t26_1-p1	eukaryotic initiation factor-4E, putative	TGME49_223410	25981	4	21.33																	4	562586
TGME49_247470-t26_1-p1	nucleolar protein, putative	TGME49_247470	59940	14	27.43											8	155591	12	388486
TGME49_292130-t26_1-p1	ribosomal protein RPL13A	TGME49_292130	32749	7	30.77																	6	538429
TGME49_289650-t26_1-p1	PEP-carboxykinase I	TGME49_289650	75343	11	20.53											1	667.179	10	518385
TGME49_287500-t26_1-p1	T complex chaperonin, putative	TGME49_287500	59333	13	25.54													10	505853
TGME49_277240-t26_1-p1	NTPase I	TGME49_277240	22641	4	20.69													2	505518
TGME49_289680-t26_1-p1	Ras-related protein Rab11	TGME49_289680	24996	9	44.75																	9	492456
TGME49_294620-t26_1-p1	eukaryotic initiation factor-3, subunit 8, putative	TGME49_294620	109193	13	14.21			1	6279.23	1	2654.85	13	468035
TGME49_264610-t26_1-p1	RNA recognition motif-containing protein	TGME49_264610	44974	8	16.74															8	470662
TGME49_226250-t26_1-p1	DEAD (Asp-Glu-Ala-Asp) box polypeptide DDX3X	TGME49_226250	78593	22	33.79							1	6001.49	15	273224	7	82337.4	10	81971.1
TGME49_211030-t26_1-p1	hypothetical protein	TGME49_211030	22216	9	48.17																	8	438640
TGME49_234190-t26_1-p1	serine hydroxymethyltransferase 2, putative	TGME49_234190	65114	8	15.8															7	436389
TGME49_305340-t26_1-p1	corepressor complex CRC230	TGME49_305340	207303	37	24.22	4	6629.13	33	341327	11	82573.4			1	273.54
TGME49_295320-t26_1-p1	embryo sac development arrest EDA7, putative	TGME49_295320	69302	12	18.66									1	3326.14	12	397934			3	14607.6
TGME49_208530-t26_1-p1	nicotinate phosphoribosyltransferase	TGME49_208530	65580	12	24.11											1	8048.21	12	402235
TGME49_287210-t26_1-p1	proteasome subunit alpha2, protease of the acylase family and NTN hydrolase fold, putative	TGME49_287210	25867	4	17.37																	4	403342
TGME49_317720-t26_1-p1	eukaryotic translation initiation factor 3 subunit 7, putative	TGME49_317720	68767	7	13.3									3	67717.1	7	333617
TGME49_204050-t26_1-p1	subtilisin SUB1	TGME49_204050	81777	10	15.9									6	211656	8	186789
TGME49_243730-t26_1-p1	rhoptry protein ROP9	TGME49_243730	37668	7	15.3																	7	397096
TGME49_245460-t26_1-p1	ribosomal protein RPS8	TGME49_245460	23561	7	39.51																	7	385198
TGME49_201780-t26_1-p1	microneme protein MIC2	TGME49_201780	82634	8	12.61									7	342247	3	29937.5
TGME49_312630-t26_1-p1	anonymous antigen-1, putative	TGME49_312630	286218	47	21.26	43	284423	18	83132	1	1425.94
TGME49_215785-t26_1-p1	rhoptry protein ROP2A	TGME49_215785	49155	7	13.39															1	363028
TGME49_285980-t26_1-p1	glucosephosphate-mutase GPM1	TGME49_285980	70587	12	23.08											12	352497
TGME49_310070-t26_1-p1	methyltransferase, putative	TGME49_310070	25336	10	55.8																	10	352010
TGME49_216670-t26_1-p1	FUSE-binding protein 2 / KH-type splicing regulatory protein	TGME49_216670	100094	20	26.35							19	349011
TGME49_319920-t26_1-p1	2-oxo acid dehydrogenases acyltransferase (catalytic domain) domain-containing protein	TGME49_319920	70290	7	14.05															7	342585
TGME49_270240-t26_1-p1	MAG1	TGME49_270240	49180	7	18.81													7	342001
TGME49_223920-t26_1-p1	rhoptry neck protein RON3	TGME49_223920	222883	27	16.5			7	25831.2	26	313410
TGME49_205510-t26_1-p1	nucleolar protein 5, putative	TGME49_205510	54349	14	29.59															14	338004
TGME49_227620-t26_1-p1	dense granule protein GRA2	TGME49_227620	19804	5	27.03																	5	336486
TGME49_256760-t26_1-p1	pyruvate kinase PyK1	TGME49_256760	57530	11	20.53													10	335279
TGME49_249390-t26_1-p1	glutamate/leucine/phenylalanine/valine dehydrogenase family protein	TGME49_249390	135701	24	27.61							24	331542
TGME49_252290-t26_1-p1	importin alpha, putative	TGME49_252290	59360	5	9.36													5	330111
TGME49_225050-t26_1-p1	adenosylhomocysteinase, putative	TGME49_225050	64106	12	25.34															10	327431
TGME49_202500-t26_1-p1	GAPM1a	TGME49_202500	33535	2	5.25																	2	326698
TGME49_216000-t26_1-p1	alveolin domain containing intermediate filament IMC3	TGME49_216000	58000	6	13.75									1	18064.9	5	285204	1	20934.4
TGME49_295110-t26_1-p1	rhoptry protein ROP7	TGME49_295110	63395	9	17.22															9	323778
TGME49_256970-t26_1-p1	vacuolar ATP synthase subunit A, putative	TGME49_256970	68122	8	12.82											1	23622.9	8	298829
TGME49_279100-t26_1-p1	hypothetical protein	TGME49_279100	47694	4	11.95															4	318846
TGME49_216260-t26_1-p1	eukaryotic initiation factor-2B, gamma subunit, putative	TGME49_216260	58016	9	21.14													9	316507
TGME49_309730-t26_1-p1	thioredoxin reductase	TGME49_309730	70781	6	10.73													5	313620
TGME49_219540-t26_1-p1	cytosolic tRNA-Ala synthetase	TGME49_219540	139516	24	23.98							23	313373
TGME49_278050-t26_1-p1	proteasome subunit alpha type 1, putative	TGME49_278050	27241	6	29.55																	6	311999
TGME49_235930-t26_1-p1	domain K- type RNA binding proteins family protein	TGME49_235930	64265	9	15.61									1	1423.85	8	288016	1	21698.5
TGME49_218780-t26_1-p1	phosphoserine aminotransferase, putative	TGME49_218780	52755	10	17.67															10	304747
TGME49_261950-t26_1-p1	ATP synthase beta subunit ATP-B	TGME49_261950	59917	10	23.57															10	301994
TGME49_299210-t26_1-p1	CTP synthase	TGME49_299210	70998	12	20.25											11	300257
TGME49_229990-t26_1-p1	T-complex protein 1 subunit alpha, putative	TGME49_229990	59216	13	22.63													12	297721
TGME49_256990-t26_1-p1	glycyl-tRNA synthetase	TGME49_256990	86374	19	24.25									19	297281
TGME49_207640-t26_1-p1	isoleucyl-tRNA synthetase family protein	TGME49_207640	141532	11	9.98							11	297016
TGME49_249650-t26_1-p1	apolipoprotein A-I binding protein, putative	TGME49_249650	43547	6	20.66																	6	280795
TGME49_221470-t26_1-p1	hypothetical protein	TGME49_221470	61517	9	13.04													8	275764
TGME49_313410-t26_1-p1	proteasome 26S regulatory subunit	TGME49_313410	117709	19	22							19	274201
TGME49_218260-t26_1-p1	histone H3.3	TGME49_218260	15413	1	5.15																	1	270313
TGME49_254570-t26_1-p1	hypothetical protein	TGME49_254570	221185	39	25.15	29	130725	18	102724	8	36030.1
TGME49_286630-t26_1-p1	redoxin domain-containing protein	TGME49_286630	31107	6	24.32																	6	266565
TGME49_236540-t26_1-p1	RNA recognition motif-containing protein	TGME49_236540	53439	10	21.64															10	261758
TGME49_290290-t26_1-p1	ubiquitin-activating enzyme E1 family protein	TGME49_290290	119811	18	20.42							17	260260
TGME49_272910-t26_1-p1	T-complex protein 1 delta subunit	TGME49_272910	58644	12	24.35													12	258697
TGME49_216860-t26_1-p1	DEAD (Asp-Glu-Ala-Asp) box polypeptide DDX39	TGME49_216860	49114	6	9.68															6	257298
TGME49_291960-t26_1-p1	rhoptry kinase family protein ROP40 (incomplete catalytic triad)	TGME49_291960	57948	7	18.67															7	256186
TGME49_207620-t26_1-p1	pyridine nucleotide-disulfide oxidoreductase domain-containing protein	TGME49_207620	71159	6	11.6													6	255399
TGME49_227948-t26_1-p1	peptidase M16 inactive domain-containing protein	TGME49_227948	142764	23	25.57							23	254083
TGME49_300100-t26_1-p1	rhoptry neck protein RON2	TGME49_300100	166464	20	15.96							14	221065									5	30443.1
TGME49_289300-t26_1-p1	methionyl-tRNA synthetase	TGME49_289300	106101	14	17.01							13	248196
TGME49_214490-t26_1-p1	peptidase M16 inactive domain-containing protein	TGME49_214490	148868	12	9.76					12	247675
TGME49_262050-t26_1-p1	rhoptry kinase family protein ROP39	TGME49_262050	65132	2	3.74															2	245187
TGME49_267080-t26_1-p1	26S protease regulatory subunit 4, putative	TGME49_267080	49121	6	12.24															6	241916
TGME49_294350-t26_1-p1	DEAD/DEAH box helicase domain-containing protein	TGME49_294350	273734	27	13.6	24	79473.3	3	5770.51			1	154716
TGME49_286080-t26_1-p1	elongation factor 2 family protein	TGME49_286080	113342	15	14.68							15	237573
TGME49_311090-t26_1-p1	ubiquitin carboxyl-terminal hydrolase	TGME49_311090	67167	8	15.32									5	111340	6	113555			1	9492.37
TGME49_201700-t26_1-p1	WD domain, G-beta repeat-containing protein	TGME49_201700	67437	4	8.1									4	228118
TGME49_244690-t26_1-p1	hypothetical protein	TGME49_244690	65004	5	11.24									5	223662					1	653.843
TGME49_230960-t26_1-p1	splicing factor 3b, subunit 3, putative	TGME49_230960	135744	18	18.33					1	576.691	15	222387
TGME49_213870-t26_1-p1	UBA/TS-N domain-containing protein	TGME49_213870	117178	12	17.37							12	222560
TGME49_205250-t26_1-p1	rhoptry protein ROP18	TGME49_205250	62666	3	5.6															3	219452
TGME49_293690-t26_1-p1	profilin PRF	TGME49_293690	17741	3	32.12									1	9176.45							3	207341
TGME49_292220-t26_1-p1	PCI domain-containing protein	TGME49_292220	61440	9	16.85													9	212836
TGME49_258050-t26_1-p1	actin like protein ALP2a	TGME49_258050	60412	10	20.6													9	207066
TGME49_311410-t26_1-p1	M phase phosphoprotein MPP10, putative	TGME49_311410	97067	11	16.4							9	204962
TGME49_202530-t26_1-p1	aspartate-tRNA ligase	TGME49_202530	86802	13	15.65											1	3116.73	12	197489
TGME49_235970-t26_1-p1	eukaryotic initiation factor-2 gamma, putative	TGME49_235970	50509	5	14.84															5	199178
TGME49_220860-t26_1-p1	DEAD/DEAH box helicase	TGME49_220860	65158	9	17.77											9	198167
TGME49_253290-t26_1-p1	valyl-tRNA synthetase	TGME49_253290	125050	12	13.02							12	197878
TGME49_239010-t26_1-p1	hypothetical protein	TGME49_239010	79588	4	8.94									3	191616			1	6251.63
TGME49_294200-t26_1-p1	glucose-6-phosphate 1-dehydrogenase	TGME49_294200	62736	10	19.11															10	197309
TGME49_268850-t26_1-p1	enolase 2	TGME49_268850	52114	9	29.26															9	194500
TGME49_312200-t26_1-p1	serine/threonine protein phosphatase	TGME49_312200	61537	11	21.35													11	192580
TGME49_231970-t26_1-p1	pre-mRNA processing splicing factor PRP8	TGME49_231970	291848	38	16.55	35	171928	9	20203.7
TGME49_306960-t26_1-p1	phenylalanine--tRNA ligase, beta subunit protein	TGME49_306960	74585	9	16									7	171644	2	17832.1
TGME49_278870-t26_1-p1	myosin F	TGME49_278870	216398	29	18.95	4	7829.58	23	135627	6	40033.5	2	5376.27
TGME49_292080-t26_1-p1	leucyl-tRNA synthetase	TGME49_292080	141139	15	13.74			1	519.958	1	226.675	14	186794
TGME49_288720-t26_1-p1	ribosomal protein RPL10	TGME49_288720	24801	6	22.17																	5	185724
TGME49_314100-t26_1-p1	tetratricopeptide repeat-containing protein	TGME49_314100	64293	4	6.72									2	148006	2	34036.1
TGME49_215220-t26_1-p1	hypothetical protein	TGME49_215220	68630	5	17.49									3	79711.2	2	61021.9	2	31871.7	1	6417.3
TGME49_291330-t26_1-p1	RNA recognition motif-containing protein	TGME49_291330	25512	5	26.32																	5	178429
TGME49_291680-t26_1-p1	Sec23/Sec24 trunk domain-containing protein	TGME49_291680	87610	8	13.53									8	175356
TGME49_211250-t26_1-p1	hypothetical protein	TGME49_211250	28568	4	14.55																	4	170345
TGME49_297070-t26_1-p1	hypothetical protein	TGME49_297070	58104	3	7.32															3	167130
TGME49_223390-t26_1-p1	activating signal cointegrator 1 complex subunit 3 family 1 ASCC3L1, putative	TGME49_223390	248403	27	16.04	1	449.851	24	164989
TGME49_286580-t26_1-p1	hypothetical protein	TGME49_286580	107245	12	15.18							12	163421
TGME49_229000-t26_1-p1	kelch repeat-containing protein	TGME49_229000	68113	6	13.23									6	156540	1	5907.51
TGME49_219820-t26_1-p1	polyubiquitin UbC, putative	TGME49_219820	68581	2	32.73	2	29663.8	2	37735	2	56211.8	1	19257.1	1	4322.91	1	5928.07					1	6188.2
TGME49_206590-t26_1-p1	calcium-dependent protein kinase CDPK2A	TGME49_206590	86378	10	12.34									9	100164	3	13582.9	5	39788
TGME49_263050-t26_1-p1	ribosomal protein RPL13	TGME49_263050	39682	8	21.69																	7	152183
TGME49_215260-t26_1-p1	carbamoylphosphate synthetase	TGME49_215260	187038	20	15.13			2	1653.21	19	148933
TGME49_269190-t26_1-p1	glyceraldehyde-3-phosphate dehydrogenase GAPDH2	TGME49_269190	105120	10	14.37							10	148392					1	2185.99
TGME49_211260-t26_1-p1	rhoptry kinase family protein ROP26 (incomplete catalytic triad)	TGME49_211260	47826	6	14.02															6	149334
TGME49_297500-t26_1-p1	T-complex protein 1 eta subunit	TGME49_297500	59475	8	15.38													7	147690
TGME49_212250-t26_1-p1	XPG N-terminal domain-containing protein	TGME49_212250	86945	8	11.99									8	145403
TGME49_221522-t26_1-p1	adaptor complexes medium subunit family protein	TGME49_221522	61127	3	5.25													3	138866			1	5059.04
TGME49_222220-t26_1-p1	alveolin domain containing intermediate filament IMC7	TGME49_222220	46812	3	8.86															3	143702
TGME49_293180-t26_1-p1	NADP-specific glutamate dehydrogenase	TGME49_293180	63799	8	13.67							1	4157.8					2	13069.1	6	122855
TGME49_221950-t26_1-p1	splicesome-associated protein, putative	TGME49_221950	64912	9	17.74											7	139573
TGME49_229010-t26_1-p1	rhoptry neck protein RON4	TGME49_229010	107176	7	7.93							7	137625
TGME49_280700-t26_1-p1	arginine decarboxylase	TGME49_280700	135672	16	15.51					1	1709.43	14	134524
TGME49_312618-t26_1-p1	hypothetical protein	TGME49_312618	59251	5	8.96													5	134479
TGME49_246740-t26_1-p1	hypothetical protein	TGME49_246740	64741	8	20.3											7	134297
TGME49_248890-t26_1-p1	actin-like protein ALP3b	TGME49_248890	60828	5	10.05											5	133180
TGME49_257490-t26_1-p1	prefoldin subunit superfamily protein	TGME49_257490	33032	1	2.34					1	132939
TGME49_277760-t26_1-p1	adenylosuccinate lyase, putative	TGME49_277760	74234	12	23.3									1	5970.23	11	126761
TGME49_249530-t26_1-p1	exportin 1, putative	TGME49_249530	129092	16	16.89							14	131682
TGME49_318410-t26_1-p1	TCP-1 chaperonin, putative	TGME49_318410	58666	5	13.59													5	129425
TGME49_226830-t26_1-p1	DnaK family protein	TGME49_226830	103193	10	11.62							9	128626
TGME49_315490-t26_1-p1	rhoptry protein ROP10	TGME49_315490	60912	4	9.22											4	127061
TGME49_315110-t26_1-p1	prefoldin, alpha subunit protein	TGME49_315110	19384	1	7.3																	1	126102
TGME49_213520-t26_1-p1	peptidase M20D, amidohydrolase	TGME49_213520	55117	5	12.45															5	125640
TGME49_291890-t26_1-p1	microneme protein MIC1	TGME49_291890	48629	1	1.97															1	125285
TGME49_220240-t26_1-p1	hypothetical protein	TGME49_220240	54103	4	11.98													4	124423
TGME49_319530-t26_1-p1	splicing factor SF2	TGME49_319530	53354	3	7.57													3	122519
TGME49_294360-t26_1-p1	ubiquitin specific protease 39 isoform 2, putative	TGME49_294360	64190	9	21.02											8	92821.6	4	26502
TGME49_308860-t26_1-p1	hypothetical protein	TGME49_308860	69757	5	9.02									4	117767
TGME49_236650-t26_1-p1	DEAD (Asp-Glu-Ala-Asp) box polypeptide 17	TGME49_236650	59968	6	12.91													6	104957	1	11826.2
TGME49_243440-t26_1-p1	histone lysine acetyltransferase GCN5-B	TGME49_243440	111545	10	12.4							9	114586
TGME49_227290-t26_1-p1	histone deacetylase HDAC3	TGME49_227290	50458	3	11.53															3	113496
TGME49_212300-t26_1-p1	hypothetical protein	TGME49_212300	75643	8	10.98									5	75344.5	5	37213.7
TGME49_312990-t26_1-p1	DEAD/DEAH box ATP-dependent RNA helicase	TGME49_312990	63847	4	8.26											4	77294.3	2	34817
TGME49_210840-t26_1-p1	arginyl-tRNA synthetase family protein	TGME49_210840	67019	9	18.82											8	109892
TGME49_203390-t26_1-p1	CRAL/TRIO domain-containing protein	TGME49_203390	50481	5	12.72													5	107756
TGME49_247520-t26_1-p1	hypothetical protein	TGME49_247520	26536	2	14.45																	2	107623
TGME49_217680-t26_1-p1	hypothetical protein	TGME49_217680	246147	19	11.15	15	61288.3	8	39533.7	2	3949.47	1	1403.22
TGME49_280380-t26_1-p1	poly(ADP-ribose) glycohydrolase	TGME49_280380	61837	5	12.12															5	103773
TGME49_202370-t26_1-p1	T-complex protein 1, epsilon subunit (TCP-1-epsilon), putative	TGME49_202370	58618	9	20.15													9	103517
TGME49_263060-t26_1-p1	Proteasome/cyclosome repeat-containing protein	TGME49_263060	125593	12	13.75					2	7567.51	9	95616.7
TGME49_318310-t26_1-p1	transketolase	TGME49_318310	76907	6	8.3									5	99181.8	1	2516.1
TGME49_223140-t26_1-p1	tRNA binding domain-containing protein	TGME49_223140	50986	5	11.86															5	101462
TGME49_307850-t26_1-p1	6-phosphogluconate dehydrogenase	TGME49_307850	54701	5	9.31															5	101328
TGME49_283698-t26_1-p1	hypothetical protein	TGME49_283698	37697	1	2.01											1	100290
TGME49_281570-t26_1-p1	hypothetical protein	TGME49_281570	52995	3	6.63															3	100242
TGME49_216410-t26_1-p1	hypothetical protein	TGME49_216410	21226	3	13.3																	3	98985.6
TGME49_222380-t26_1-p1	importin-beta N-terminal domain-containing protein	TGME49_222380	129488	10	10.03							10	98344.9
TGME49_273490-t26_1-p1	glutamine synthetase, type I, putative	TGME49_273490	65147	4	7.94															4	98231.9
TGME49_219850-t26_1-p1	prolyl-tRNA synthetase (ProRS)	TGME49_219850	93479	13	16.99							1	1172.02	13	96461
TGME49_269200-t26_1-p1	crooked neck family 1 protein isoform 2, putative	TGME49_269200	81694	5	7.73									5	97420.5
TGME49_277000-t26_1-p1	transport protein Sec24, putative	TGME49_277000	108035	5	6.48							5	97396.9
TGME49_283780-t26_1-p1	glucose-6-phosphate isomerase GPI	TGME49_283780	74385	8	13.16													8	96628
TGME49_280490-t26_1-p1	U-box domain-containing protein	TGME49_280490	121997	8	9.27							8	96494.3
TGME49_291000-t26_1-p1	PHD-finger domain-containing protein	TGME49_291000	57115	4	9.3											1	6345.29	4	90127.8
TGME49_266990-t26_1-p1	beta-COP	TGME49_266990	121954	8	8.43							8	96373.7
TGME49_221320-t26_1-p1	acetyl-CoA carboxylase ACC1	TGME49_221320	287682	27	11.79	25	60268.5	12	34260.6	1	963.442	1	567.285
TGME49_319340-t26_1-p1	hypothetical protein	TGME49_319340	52403	4	12.68															3	95985
TGME49_293580-t26_1-p1	prefoldin subunit protein	TGME49_293580	18345	4	30.59																	4	95570.7
TGME49_309300-t26_1-p1	SAG-related sequence SRS55A	TGME49_309300	39944	1	2.41													1	95537.6
TGME49_318440-t26_1-p1	helicase associated domain (ha2) protein	TGME49_318440	236962	20	11.32	4	5464.86	19	82662.5	3	7253.11
TGME49_232440-t26_1-p1	Brf1p family coiled coil protein	TGME49_232440	54044	4	10.26													4	94485.3
TGME49_248880-t26_1-p1	GTPase RAB7	TGME49_248880	47713	5	15.97																	5	94356.2
TGME49_217890-t26_1-p1	alkyl hydroperoxide reductase/ Thiol specific antioxidant/ Mal allergen, putative	TGME49_217890	21722	4	30.1																	4	92163.1
TGME49_318260-t26_1-p1	transcription initiation factor TFIID subunit TAF5	TGME49_318260	117949	11	15.9							8	92068.5
TGME49_225470-t26_1-p1	peptide methionine sulfoxide reductase	TGME49_225470	30384	4	21.56																	4	91707.6
TGME49_307570-t26_1-p1	glycerol-3-phosphate dehydrogenase (gpdh), putative	TGME49_307570	98815	10	14.63															10	91063.8
TGME49_217820-t26_1-p1	PCI domain-containing protein	TGME49_217820	51723	4	6.91															3	89449.2
TGME49_226570-t26_1-p1	hypothetical protein	TGME49_226570	14996	1	8.63																	1	86217.9
TGME49_261210-t26_1-p1	26s proteasome subunit p55, putative	TGME49_261210	55050	5	10.93															5	85825.1
TGME49_258060-t26_1-p1	myosin heavy chain, putative	TGME49_258060	23352	3	11.06																	3	84664
TGME49_258740-t26_1-p1	eukaryotic initiation factor-2A, putative	TGME49_258740	64654	8	17.51											2	8545.73	6	76027.1
TGME49_229180-t26_1-p1	HEAT repeat-containing protein	TGME49_229180	136164	8	6.14					5	37979.6	7	45935.6
TGME49_209210-t26_1-p1	hypothetical protein	TGME49_209210	165808	8	6.47					8	82829.3
TGME49_285190-t26_1-p1	zinc finger, C3HC4 type (RING finger) domain-containing protein	TGME49_285190	70082	2	3.67									2	81563.7
TGME49_204480-t26_1-p1	thioredoxin domain-containing protein	TGME49_204480	72203	3	5.01													3	80709.4
TGME49_224060-t26_1-p1	thioredoxin, putative	TGME49_224060	68948	6	12.22											5	74072.6	1	5645.92
TGME49_214440-t26_1-p1	4'-phosphopantetheinyl transferase superfamily protein	TGME49_214440	48506	3	8.47															3	77438
TGME49_321680-t26_1-p1	hypothetical protein	TGME49_321680	40661	3	10.75															3	77321.4
TGME49_268950-t26_1-p1	hypothetical protein	TGME49_268950	60197	7	18.78											6	75659.9
TGME49_219590-t26_1-p1	RuvB family 1 protein	TGME49_219590	52950	5	14.63															5	75006.3
TGME49_288040-t26_1-p1	hypothetical protein	TGME49_288040	138625	8	6.43					8	74578.8
TGME49_227960-t26_1-p1	PCI domain-containing protein	TGME49_227960	55708	5	10.67															3	74496.8
TGME49_249360-t26_1-p1	RED family protein	TGME49_249360	66928	7	13.82									6	74329.8
TGME49_231600-t26_1-p1	HEAT repeat-containing protein	TGME49_231600	128091	6	5.05							6	73509.5
TGME49_205580-t26_1-p1	nuclear factor NF4	TGME49_205580	51221	5	16.9													5	73479.4
TGME49_217740-t26_1-p1	3-ketoacyl-(acyl-carrier-protein) reductase	TGME49_217740	39040	6	20.74																	6	72802.6
TGME49_205710-t26_1-p1	lysine-tRNA ligase	TGME49_205710	74395	9	15.81											8	70790.1
TGME49_235450-t26_1-p1	ubiquitin-conjugating enzyme subfamily protein	TGME49_235450	25924	1	5.63																	1	70781.9
TGME49_315530-t26_1-p1	hypothetical protein	TGME49_315530	126079	8	8.47							7	68465.1
TGME49_313390-t26_1-p1	ribosomal protein RPL6	TGME49_313390	31222	8	30.85																	8	68362.7
TGME49_293425-t26_1-p1	hypothetical protein	TGME49_293425	60246	1	2.01															1	67971.7
TGME49_300120-t26_1-p1	aminotransferase, class V superfamily protein	TGME49_300120	89642	5	7.44									5	67163.5
TGME49_239590-t26_1-p1	WD domain, G-beta repeat-containing protein	TGME49_239590	74725	5	10.54									5	53006.3	3	14070
TGME49_323100-t26_1-p1	hypothetical protein	TGME49_323100	15886	1	8.28															1	67003.8
TGME49_255260-t26_1-p1	apical membrane antigen AMA1	TGME49_255260	63021	5	12.3													4	66723.3
TGME49_265530-t26_1-p1	RNA recognition motif-containing protein	TGME49_265530	51488	3	8.74													3	61639.2	1	4923.62
TGME49_240650-t26_1-p1	coatomer protein complex, subunit alpha, putative	TGME49_240650	142954	9	6.77							8	66522.7
TGME49_312530-t26_1-p1	splicing factor, CC1 family protein	TGME49_312530	69366	5	8.69									5	57548.5	1	8972.55
TGME49_305240-t26_1-p1	XPA binding protein 2 family protein	TGME49_305240	111444	8	8.8							7	66258.8
TGME49_244100-t26_1-p1	snoRNA binding domain-containing protein	TGME49_244100	59851	4	8.14											3	55217.7	1	10768.6
TGME49_217600-t26_1-p1	calcium-dependent protein kinase CDPK9	TGME49_217600	75601	6	9.46											6	64645.3
TGME49_224850-t26_1-p1	polyadenylate binding protein, putative	TGME49_224850	82573	4	5.73									2	12646.4	4	38447.1	1	12687.4
TGME49_246330-t26_1-p1	CRAL/TRIO domain-containing protein	TGME49_246330	48774	6	14.55															4	63684
TGME49_264830-t26_1-p1	hypothetical protein	TGME49_264830	136604	8	9.03							8	63619.7
TGME49_305860-t26_1-p1	calcium-dependent protein kinase CDPK3	TGME49_305860	60430	4	9.5													4	46771.7	1	16787.6
TGME49_254500-t26_1-p1	hypothetical protein	TGME49_254500	60687	3	7.68											2	62709.4
TGME49_318700-t26_1-p1	eukaryotic initiation factor-6, putative	TGME49_318700	28573	2	10.61																	2	62564.1
TGME49_248120-t26_1-p1	hypothetical protein	TGME49_248120	100764	7	8.42							6	56185.8	1	6299.82
TGME49_262920-t26_1-p1	trypsin domain-containing protein	TGME49_262920	104525	7	8.54															5	62099.3
TGME49_212960-t26_1-p1	hypothetical protein	TGME49_212960	47540	3	7.91															3	61821.8
TGME49_233190-t26_1-p1	SKIP/SNW domain-containing protein	TGME49_233190	61491	3	7.18											3	61697.6
TGME49_284190-t26_1-p1	pyruvate carboxylase	TGME49_284190	152146	8	7.4							7	61457.2
TGME49_277510-t26_1-p1	cytoplasmic dynein intermediate chain	TGME49_277510	73463	1	1.18									1	60931.7
TGME49_224350-t26_1-p1	aminopeptidase N, putative	TGME49_224350	156761	10	6.91							10	60842.8
TGME49_235020-t26_1-p1	COPI protein, putative	TGME49_235020	137057	8	8.2							7	52363.2									1	8203.55
TGME49_269885-t26_1-p1	rhoptry metalloprotease toxolysin TLN1	TGME49_269885	182009	8	5.53					7	60099.5
TGME49_271350-t26_1-p1	bifunctional protein FolC subfamily protein	TGME49_271350	61449	4	9.76													2	59674.3
TGME49_316900-t26_1-p1	Sas10 C-terminal domain-containing protein	TGME49_316900	90550	4	7.5							3	59328.3
TGME49_215420-t26_1-p1	SNARE protein	TGME49_215420	26152	3	15.65																	3	58791.7
TGME49_223960-t26_1-p1	ubiquitin interaction motif family protein	TGME49_223960	41377	4	13.4															3	58539.8
TGME49_257100-t26_1-p1	hypothetical protein	TGME49_257100	62906	5	9.4													5	58494.5
TGME49_232600-t26_1-p1	phospholipase, patatin family protein	TGME49_232600	70811	3	5.56									3	57947.5
TGME49_266120-t26_1-p1	thioredoxin-dependent peroxidase TPX1/2	TGME49_266120	37219	3	9.61																	3	57084.9
TGME49_290005-t26_1-p1	proteasome subunit beta type 1, putative	TGME49_290005	39916	3	13.09																	3	56525.8
TGME49_249780-t26_1-p1	hypothetical protein	TGME49_249780	35575	1	5.49																	1	56506.7
TGME49_233110-t26_1-p1	IMP dehydrogenas	TGME49_233110	59104	4	8.89													3	55815.2
TGME49_280370-t26_1-p1	hypothetical protein	TGME49_280370	71866	5	10.83									3	37583.3	1	1370.27	2	13239.1	2	3514.43
TGME49_232130-t26_1-p1	hypothetical protein	TGME49_232130	47866	3	10.09															3	55515.3
TGME49_285760-t26_1-p1	U-snRNP-associated cyclophilin family protein	TGME49_285760	22971	2	11.37																	2	54407.2
TGME49_312480-t26_1-p1	uracil phosphoribosyltransferase FUR1, putative	TGME49_312480	27646	4	18.85																	3	54188.5
TGME49_320570-t26_1-p1	elongation factor Tu, putative	TGME49_320570	63550	3	8.53											3	54171.8
TGME49_206470-t26_1-p1	pyruvate dehydrogenase complex subunit PDH-E3II	TGME49_206470	55121	3	5.01															3	54143.8
TGME49_210980-t26_1-p1	alternative splicing type 3 and, putative	TGME49_210980	64529	4	5.96											4	53746.5
TGME49_319850-t26_1-p1	splicing factor U2AF family SnRNP auxilary factor large subunit, RRM domain-containing protein	TGME49_319850	51681	1	2.02															1	52999.5
TGME49_220270-t26_1-p1	alveolin domain containing intermediate filament IMC6	TGME49_220270	48635	5	17.34													5	52911.8
TGME49_229750-t26_1-p1	hypothetical protein	TGME49_229750	146076	5	4.11					5	52537.4
TGME49_305770-t26_1-p1	ABC transporter, ATP-binding domain-containing protein	TGME49_305770	50658	4	6.05															4	52166.7
TGME49_205220-t26_1-p1	U5 snRNP-associated subunit, putative	TGME49_205220	122775	8	8							7	51771.7
TGME49_232660-t26_1-p1	Hsp70 interacting protein HIP	TGME49_232660	45143	2	7.06															2	51525.9
TGME49_228100-t26_1-p1	hypothetical protein	TGME49_228100	139352	8	7.23					7	49682.6
TGME49_270320-t26_1-p1	protein phosphatase 2C domain-containing protein	TGME49_270320	58674	4	11.15													3	49366.1
TGME49_273370-t26_1-p1	coatomer gamma 2-subunit protein, putative	TGME49_273370	112294	5	6.03							4	43434.3	1	5077.44	1	785.447
TGME49_313980-t26_1-p1	ribosome biogenesis protein nep1, putative	TGME49_313980	26003	3	15.74																	3	49172.6
TGME49_218420-t26_1-p1	WD domain, G-beta repeat-containing protein	TGME49_218420	62558	2	2.78											2	48122.6
TGME49_228170-t26_1-p1	inner membrane complex protein IMC2A	TGME49_228170	170816	8	5.97					8	47043.2
TGME49_253040-t26_1-p1	actin-related protein ARP4A	TGME49_253040	77030	5	9.22									5	45964.5	1	933.187
TGME49_318580-t26_1-p1	glucosephosphate-mutase GPM2	TGME49_318580	65882	2	2.85													2	46450.3
TGME49_273870-t26_1-p1	SWI2/SNF2 ISWI-like (AT hook)	TGME49_273870	175264	4	2.63			4	20677.4	4	25741.7
TGME49_230210-t26_1-p1	alveolin domain containing intermediate filament IMC10	TGME49_230210	61188	4	11.96											4	46039.5
TGME49_306600-t26_1-p1	RNA recognition motif-containing protein	TGME49_306600	21205	3	20.11																	3	45424.4
TGME49_222860-t26_1-p1	eukaryotic translation initiation factor, putative	TGME49_222860	88392	4	4.76									4	44764.9
TGME49_288860-t26_1-p1	RuvB family 2 protein	TGME49_288860	55446	3	7.87															2	44325.5
TGME49_222160-t26_1-p1	aldehyde dehydrogenase	TGME49_222160	53702	3	7.24															2	43828.7
TGME49_306060-t26_1-p1	rhoptry neck protein RON8	TGME49_306060	328900	16	7.08	16	39609.5	1	3593.34
TGME49_202770-t26_1-p1	RNA recognition motif-containing protein	TGME49_202770	55868	1	3.01													1	43136.6
TGME49_299810-t26_1-p1	cysteine-tRNA synthetase (CysRS)	TGME49_299810	101371	3	4.9									2	42956.6
TGME49_316330-t26_1-p1	superoxide dismutase SOD2	TGME49_316330	31463	2	12.89																	2	42790.4
TGME49_219140-t26_1-p1	EF-1 guanine nucleotide exchange domain-containing protein	TGME49_219140	20734	1	4.81																	1	42789.2
TGME49_310030-t26_1-p1	cyclase-associated protein, putative	TGME49_310030	22484	2	13.3																	1	42363.9
TGME49_230160-t26_1-p1	hypothetical protein	TGME49_230160	15944	1	8.45																	1	41922.5
TGME49_218200-t26_1-p1	UDP-sugar pyrophospharylase	TGME49_218200	67852	5	9.47											5	41833.2
TGME49_251620-t26_1-p1	flap structure-specific endonuclease 1, putative	TGME49_251620	60296	3	7.61											3	41601.4
TGME49_244110-t26_1-p1	nucleosome assembly protein (nap) protein	TGME49_244110	48587	4	12.93															4	41524.2
TGME49_285230-t26_1-p1	PRP38 family protein	TGME49_285230	68774	3	6.51									3	40755.5
TGME49_311310-t26_1-p1	protein phosphatase 2B catalytic subunit, calcineurin family phosphatse superfamily protein	TGME49_311310	56446	2	3.99															2	40341.7
TGME49_205470-t26_1-p1	translation elongation factor 2 family protein, putative	TGME49_205470	106572	3	3.05	1	12076.1							1	9876.95			1	18132.4
TGME49_313140-t26_1-p1	isocitrate dehydrogenase	TGME49_313140	68296	4	7.41															4	39454
TGME49_230850-t26_1-p1	hypothetical protein	TGME49_230850	50618	2	6.3															2	39096.8
TGME49_247220-t26_1-p1	nudix -type motif 9 isoform a family protein	TGME49_247220	60639	2	7.51															1	39041.1
TGME49_264000-t26_1-p1	aldehyde dehydrogenase	TGME49_264000	68990	5	8.65									1	4166.91	5	34822
TGME49_288500-t26_1-p1	FAD Malate-dehydrogenase (MDH-FAD)	TGME49_288500	60381	3	6.36															3	38862.5
TGME49_231350-t26_1-p1	glucosamine-fructose-6-phosphate aminotransferase	TGME49_231350	96713	4	5.01											4	38830.8
TGME49_300000-t26_1-p1	ribosomal protein RPL18	TGME49_300000	21170	2	16.04																	2	38544.6
TGME49_231960-t26_1-p1	omega secalin, putative	TGME49_231960	201902	9	7.77			2	4584.71	6	31398.9	1	869.815					1	1360.51
TGME49_219720-t26_1-p1	Ras-related protein Rab-5C, putative	TGME49_219720	25801	2	13.99																	2	37993
TGME49_265520-t26_1-p1	hypothetical protein	TGME49_265520	56677	3	6.05													3	37752.7
TGME49_264660-t26_1-p1	SAG-related sequence SRS44	TGME49_264660	262472	3	1.39	2	37719.4
TGME49_253730-t26_1-p1	importin-beta N-terminal domain-containing protein	TGME49_253730	115146	4	3.43							3	37343.4
TGME49_244560-t26_1-p1	heat shock protein 90, putative	TGME49_244560	96823	3	5.31							2	26759	1	10191.4
TGME49_306930-t26_1-p1	proteasome subunit beta type 7 precursor, putative	TGME49_306930	39588	4	16.03																	4	36947.6
TGME49_262750-t26_1-p1	histone lysine methyltransferase, SET, putative	TGME49_262750	53633	1	2.3													1	36778.5
TGME49_225060-t26_1-p1	nucleoredoxin family protein	TGME49_225060	45226	1	2.16																	1	36692.4
TGME49_258870-t26_1-p1	hypothetical protein	TGME49_258870	101597	5	6.77									4	24084.2	1	5805.8			1	5731.19
TGME49_318510-t26_1-p1	N-ethylmaleimide-sensitive fusion protein, putative	TGME49_318510	83467	4	5.99									4	35517.9
TGME49_235380-t26_1-p1	hypothetical protein	TGME49_235380	65184	5	11.66											5	35021.6
TGME49_216790-t26_1-p1	ATP-binding cassette sub-family E member 1, putative	TGME49_216790	69219	3	5.06											1	4163.91	2	30746.5
TGME49_225125-t26_1-p1	pre-rRNA processing protein	TGME49_225125	310135	12	4.71	11	34003.8	1	802.506
TGME49_214200-t26_1-p1	WD domain, G-beta repeat-containing protein	TGME49_214200	150519	8	7.74					7	34385.5
TGME49_299780-t26_1-p1	hypothetical protein	TGME49_299780	59371	2	3.67															2	34147.7
TGME49_305980-t26_1-p1	pyruvate dehydrogenase complex subunit PDH-E3I	TGME49_305980	66839	4	8.46													1	8948.99	2	25113
TGME49_261600-t26_1-p1	creatinase domain-containing protein	TGME49_261600	96143	4	5.19									4	33818.2
TGME49_202460-t26_1-p1	diacylglycerol kinase accessory domain (presumed) domain-containing protein	TGME49_202460	72936	3	5.89									3	25787.4	1	3634.99	1	4390.3
TGME49_267660-t26_1-p1	hypothetical protein	TGME49_267660	170100	6	6.42					5	33310.4
TGME49_288380-t26_1-p1	heat shock protein HSP90	TGME49_288380	81933	3	4.8									3	32895.7
TGME49_289730-t26_1-p1	Pep3/Vps18/deep orange family protein	TGME49_289730	128290	4	4.75							4	32869.1
TGME49_288830-t26_1-p1	NADH dehydrogenase (NDH2-II)	TGME49_288830	72108	3	5.02													3	32819.2
TGME49_295310-t26_1-p1	tubulin binding cofactor A protein	TGME49_295310	21418	1	5.29																	1	32653.9
TGME49_215730-t26_1-p1	Gas41, putative	TGME49_215730	54702	3	7.54													2	32524.1
TGME49_215160-t26_1-p1	hypothetical protein	TGME49_215160	31176	1	3.72																	1	32289.8
TGME49_288290-t26_1-p1	hypothetical protein	TGME49_288290	55062	3	8.12													3	32083.4
TGME49_251690-t26_1-p1	seryl-tRNA synthetase, cytoplasmic, putative	TGME49_251690	54117	2	4.77													1	11059.7	1	20604.1
TGME49_237470-t26_1-p1	glycine cleavage T-protein (aminomethyl transferase) domain-containing protein	TGME49_237470	92401	5	5.89													5	31240.6
TGME49_263070-t26_1-p1	CMGC kinase, CK2 family	TGME49_263070	59824	2	6.12															2	31171.7
TGME49_320300-t26_1-p1	SWI2/SNF2 Brahma-like putative	TGME49_320300	182331	5	4.98					5	31071.4
TGME49_249610-t26_1-p1	hypothetical protein	TGME49_249610	135999	4	5.66					4	31015.9
TGME49_262960-t26_1-p1	U1 snRNP-associated protein Usp106, putative	TGME49_262960	44776	1	2.79															1	30611.5
TGME49_205010-t26_1-p1	U2 small nuclear ribonucleoprotein family protein, putative	TGME49_205010	150782	4	3.9					3	30575.7
TGME49_294550-t26_1-p1	dynein heavy chain	TGME49_294550	558602	30	6.71	28	30514.5
TGME49_219710-t26_1-p1	hypothetical protein	TGME49_219710	200026	8	6.5			5	15965.3	3	6780.72	4	7336.82			1	191.434
TGME49_203450-t26_1-p1	DUF3228 domain-containing protein	TGME49_203450	50686	3	7.74																	3	30250
TGME49_270930-t26_1-p1	hypothetical protein	TGME49_270930	317119	14	5.37	13	23098.2	4	7126.1
TGME49_295730-t26_1-p1	tetratricopeptide repeat-containing protein	TGME49_295730	47415	3	8.29															3	30078.9
TGME49_202680-t26_1-p1	peptidase M16, alpha subunit, putative	TGME49_202680	62204	1	2.31															1	29684.5
TGME49_279420-t26_1-p1	hypothetical protein	TGME49_279420	144942	4	4.36							4	29616.3
TGME49_246340-t26_1-p1	DnaJ domain-containing protein	TGME49_246340	95360	3	4.22									2	29384.8
TGME49_201380-t26_1-p1	chorismate synthase, putative	TGME49_201380	58104	2	4.1													2	29107.4
TGME49_275802-t26_1-p1	SRP72 RNA-binding domain-containing protein	TGME49_275802	79710	6	9.59									5	29008.2
TGME49_289600-t26_1-p1	heat shock protein HSP29	TGME49_289600	29649	2	8.09																	2	28975.3
TGME49_215910-t26_1-p1	hypothetical protein	TGME49_215910	327986	14	5.78	11	26794	2	2104.32
TGME49_289550-t26_1-p1	WD domain, G-beta repeat-containing protein	TGME49_289550	57271	2	4.72											2	28629.8
TGME49_256050-t26_1-p1	signal recognition particle 14kd protein	TGME49_256050	18965	1	8.14																	1	28468.2
TGME49_213392-t26_1-p1	surface antigen repeat-containing protein	TGME49_213392	253281	8	4.15	2	2054.32	2	3229.16	7	22078.8
TGME49_295680-t26_1-p1	periodic tryptophan protein PWP2, putative	TGME49_295680	136774	4	3.55							4	27241.2
TGME49_294970-t26_1-p1	hypothetical protein	TGME49_294970	68050	4	7.74											3	26922.9
TGME49_213280-t26_1-p1	SAG-related sequence SRS25	TGME49_213280	20791	1	13.61																	1	26864.8
TGME49_228210-t26_1-p1	26S proteasome regulatory subunit	TGME49_228210	44455	1	1.76					1	26599
TGME49_237500-t26_1-p1	protein phosphatase 2C domain-containing protein	TGME49_237500	97305	8	9.57									5	19568.2	3	5495.96	1	1476.01
TGME49_253650-t26_1-p1	DnaJ C terminal region domain-containing protein	TGME49_253650	76279	2	3.09															2	26451
TGME49_314540-t26_1-p1	hypothetical protein	TGME49_314540	66387	3	5.93									3	26436.7
TGME49_209150-t26_1-p1	non-proton pumping type-II NADH dehydrogenase I	TGME49_209150	67026	3	5.99											3	26360.8
TGME49_259880-t26_1-p1	hypothetical protein	TGME49_259880	88025	3	3.87							3	26251.2
TGME49_319910-t26_1-p1	WD domain, G-beta repeat-containing protein	TGME49_319910	57343	2	4.86													2	26213.8
TGME49_202480-t26_1-p1	hypothetical protein	TGME49_202480	43649	1	2.33													1	25841.2
TGME49_277080-t26_1-p1	microneme protein MIC5	TGME49_277080	19872	2	13.26																	2	25521.6
TGME49_243930-t26_1-p1	hypothetical protein	TGME49_243930	101348	2	2.23											1	25357.5
TGME49_309950-t26_1-p1	NLE (NUC135) domain-containing protein	TGME49_309950	65352	3	7.54													3	25322.6
TGME49_214770-t26_1-p1	small GTP binding protein rab1a, putative	TGME49_214770	22880	1	7.43																	1	24345.4
TGME49_306330-t26_1-p1	phospholipase	TGME49_306330	63256	1	2.23									1	24316.2
TGME49_231210-t26_1-p1	sarcalumenin/eps15 family protein	TGME49_231210	66866	2	2.86											2	24059.8
TGME49_310570-t26_1-p1	hypothetical protein	TGME49_310570	44869	1	3.09													1	24018.8
TGME49_207720-t26_1-p1	hypothetical protein	TGME49_207720	177013	4	3.38					4	23825.9
TGME49_208390-t26_1-p1	hypothetical protein	TGME49_208390	47053	3	8.96															3	23820.4
TGME49_246170-t26_1-p1	ARID/BRIGHT DNA binding domain-containing protein	TGME49_246170	286303	12	6.12	1	227.172	8	18080.6			2	4042.39			1	1238.07
TGME49_268570-t26_1-p1	zinc finger (CCCH type) motif-containing protein	TGME49_268570	47063	1	5.79															1	23031.2
TGME49_220610-t26_1-p1	protein phosphatase 2C domain-containing protein	TGME49_220610	58057	2	4.74													2	22802.2
TGME49_253470-t26_1-p1	alveolin domain containing intermediate filament IMC13	TGME49_253470	45789	1	2.01															1	22448.5
TGME49_228400-t26_1-p1	WD domain, G-beta repeat-containing protein	TGME49_228400	69954	5	8.07											3	22442.2
TGME49_308950-t26_1-p1	histidine acid phosphatase superfamily protein	TGME49_308950	66303	2	3.51													2	22432.2
TGME49_270250-t26_1-p1	dense granule protein GRA1	TGME49_270250	20225	1	6.32																	1	22281.8
TGME49_223540-t26_1-p1	importin-beta N-terminal domain-containing protein	TGME49_223540	122221	4	4.38							3	22232.4
TGME49_306910-t26_1-p1	hypothetical protein	TGME49_306910	55691	1	1.73															1	22049.8
TGME49_202390-t26_1-p1	S15 sporozoite-expressed protein	TGME49_202390	61797	1	2.04									1	22031.5
TGME49_224580-t26_1-p1	RNA recognition motif-containing protein	TGME49_224580	54418	2	5.01													2	21973.7
TGME49_218610-t26_1-p1	ATPase (DUF699) protein	TGME49_218610	136211	4	3.77					3	13998	2	7846.77
TGME49_250770-t26_1-p1	eukaryotic initiation factor-4A, putative	TGME49_250770	46673	1	3.88															1	21777.8
TGME49_285268-t26_1-p1	DnaJ domain-containing protein	TGME49_285268	49344	1	2.78													1	21392.1
TGME49_270690-t26_1-p1	arginyl-tRNA synthetase	TGME49_270690	130256	3	2.3							3	21076
TGME49_243460-t26_1-p1	hypothetical protein	TGME49_243460	209866	4	2.69			4	14465.9	2	6435.06
TGME49_319658-t26_1-p1	CBF/Mak21 family protein	TGME49_319658	73895	4	8.31									2	20382.7	1	488.705
TGME49_257480-t26_1-p1	NADP-dependent succinate-semialdehyde dehydrogenase	TGME49_257480	75884	3	5.5													3	20745.4
TGME49_231480-t26_1-p1	GCN1, putative	TGME49_231480	362621	17	6.44	17	20742.6
TGME49_257710-t26_1-p1	actin-like protein ALP 5	TGME49_257710	66517	2	4.08											2	20636.3
TGME49_236840-t26_1-p1	zinc finger (C-x8-C-x5-C-x3-H)-2, putative	TGME49_236840	41962	2	5.38															2	20606.4
TGME49_311030-t26_1-p1	hypothetical protein	TGME49_311030	402506	9	2.76	9	15502.9	3	5065.03
TGME49_204400-t26_1-p1	ATPase synthase subunit alpha, putative	TGME49_204400	62146	1	1.73													1	20102.8
TGME49_310460-t26_1-p1	Rab6	TGME49_310460	23471	1	5.26																	1	20050.8
TGME49_212820-t26_1-p1	ubiquitin family protein	TGME49_212820	119003	4	5.61					2	12940.6	1	7078.8
TGME49_265390-t26_1-p1	hypothetical protein	TGME49_265390	58453	3	4.54													3	19974.5
TGME49_298020-t26_1-p1	DEAD-family helicase	TGME49_298020	130967	3	3.28					3	18161.8	1	1262.58
TGME49_268870-t26_1-p1	tetratricopeptide repeat-containing protein	TGME49_268870	114007	4	5.04							3	19185.8
TGME49_262670-t26_1-p1	ribosomal protein RPL18A	TGME49_262670	21330	1	4.92																	1	19116
TGME49_286920-t26_1-p1	SWIRM domain-containing protein	TGME49_286920	83974	4	6.92									2	4604.9	4	14459.5
TGME49_257150-t26_1-p1	NOT2 / NOT3 / NOT5 family protein	TGME49_257150	53120	2	7.01													2	18888.1
TGME49_291950-t26_1-p1	RNA recognition motif-containing protein	TGME49_291950	73853	1	1.93									1	8233.98	1	10438.3
TGME49_239300-t26_1-p1	hypothetical protein	TGME49_239300	139185	3	2.52					3	18641.9
TGME49_321500-t26_1-p1	RNA recognition motif-containing protein	TGME49_321500	50938	1	1.68															1	18544.6
TGME49_297970-t26_1-p1	aspartyl aminopeptidase	TGME49_297970	55897	2	7.68															2	18451.1
TGME49_254420-t26_1-p1	phospholipase, patatin family protein	TGME49_254420	127354	4	3.84															4	18280.5
TGME49_205320-t26_1-p1	hypothetical protein	TGME49_205320	70850	1	6.87									1	18198.9
TGME49_211090-t26_1-p1	aminotransferase, class V superfamily protein	TGME49_211090	68283	1	1.27															1	18076.1
TGME49_211690-t26_1-p1	AAA family protein	TGME49_211690	167149	6	5.01					5	17917.4
TGME49_205500-t26_1-p1	hypothetical protein	TGME49_205500	116859	2	1.74					2	17833.9
TGME49_285850-t26_1-p1	peptidyl-prolyl cis-trans isomerase, FKBP-type domain-containing protein	TGME49_285850	46099	1	3.5															1	17390
TGME49_255320-t26_1-p1	mRNA turnover 4 (MRT4) family protein	TGME49_255320	25866	2	15.35																	2	17365
TGME49_248130-t26_1-p1	hypothetical protein	TGME49_248130	93453	2	2.2									2	17225.9
TGME49_289330-t26_1-p1	ubiquitin carboxyl-terminal hydrolase family 2 protein	TGME49_289330	248338	7	4.53			5	11967.5	3	4960.13
TGME49_319950-t26_1-p1	rRNA-processing protein FCF1, putative	TGME49_319950	23022	1	6.47																	1	16815
TGME49_265180-t26_1-p1	hypothetical protein	TGME49_265180	48374	3	8.85															2	16763.2
TGME49_214820-t26_1-p1	G-patch domain-containing protein	TGME49_214820	49582	1	3													1	16640
TGME49_320740-t26_1-p1	hypothetical protein	TGME49_320740	36968	2	7.21																	1	16639.1
TGME49_217050-t26_1-p1	ADA2-A transcriptional co-activator SAGA component	TGME49_217050	126320	2	2.83					2	16475
TGME49_209690-t26_1-p1	small nuclear ribonucleoprotein	TGME49_209690	24897	1	4.72																	1	16446.8
TGME49_288460-t26_1-p1	hypothetical protein	TGME49_288460	198470	3	1.71			1	944.254	3	15415
TGME49_321620-t26_1-p1	dynamin-related protein DRPB	TGME49_321620	95931	2	3.37											2	16324.1
TGME49_203980-t26_1-p1	hypothetical protein	TGME49_203980	201280	4	2.97			3	16222.1
TGME49_305610-t26_1-p1	hypothetical protein	TGME49_305610	52085	1	1.66													1	16097.9
TGME49_231410-t26_1-p1	hypothetical protein	TGME49_231410	64728	1	1.58															1	16018.4
TGME49_270550-t26_1-p1	gamma-glutamyl phosphate reductase, putative	TGME49_270550	54410	2	4.38															2	15905.4
TGME49_275480-t26_1-p1	Myb family DNA-binding domain-containing protein	TGME49_275480	99259	2	3.04							2	15817.6
TGME49_270640-t26_1-p1	RNA recognition motif-containing protein	TGME49_270640	24547	1	4.33																	1	15693.3
TGME49_307810-t26_1-p1	hypothetical protein	TGME49_307810	44172	1	5.44															1	15674.7
TGME49_257030-t26_1-p1	hypothetical protein	TGME49_257030	55367	1	2.16													1	15553.4
TGME49_227650-t26_1-p1	microtubule-associated protein RP/EB family, putative	TGME49_227650	45690	1	2.66															1	15539.4
TGME49_263190-t26_1-p1	adenylosuccinate lyase, putative	TGME49_263190	55136	1	1.8															1	15465.1
TGME49_260670-t26_1-p1	centrin, putative	TGME49_260670	26582	1	7.14																	1	15455.6
TGME49_267330-t26_1-p1	fumarate hydratase	TGME49_267330	84294	5	8.89													4	15399.8
TGME49_249480-t26_1-p1	tetratricopeptide repeat-containing protein	TGME49_249480	126392	5	6.37							3	15321.6
TGME49_267480-t26_1-p1	tRNA (guanine(26)-N(2))-dimethyltransferase, putative	TGME49_267480	76065	1	1.87									1	14274.5	1	810.265
TGME49_295125-t26_1-p1	rhoptry protein ROP4	TGME49_295125	42389	5	18.85															1	14883.5
TGME49_306460-t26_1-p1	bromodomain-containing protein	TGME49_306460	109498	3	4.05							2	14788.5
TGME49_258210-t26_1-p1	DNA-directed RNA polymerase II RPB2	TGME49_258210	140951	2	1.43					2	13268.2	1	1330.17
TGME49_222000-t26_1-p1	brix domain-containing protein	TGME49_222000	58521	1	1.74													1	14569.2
TGME49_271050-t26_1-p1	SAG-related sequence SRS34A	TGME49_271050	19106	1	11.76																	1	14544.9
TGME49_214290-t26_1-p1	DJ-1 family protein	TGME49_214290	27939	2	10.55																	2	14328.7
TGME49_227850-t26_1-p1	peptidyl-prolyl cis-trans isomerase, cyclophilin-type domain-containing protein	TGME49_227850	66253	2	3.55											2	14303.9
TGME49_241150-t26_1-p1	hypothetical protein	TGME49_241150	65206	2	3.55											2	14239.7
TGME49_235670-t26_1-p1	hypothetical protein	TGME49_235670	59914	1	1.97											1	14157.6
TGME49_276170-t26_1-p1	phosphatidylinositol 3- and 4-kinase	TGME49_276170	134544	5	5.21					3	8283.57			1	1676.74	3	4116.62
TGME49_305040-t26_1-p1	HEAT repeat-containing protein	TGME49_305040	125972	4	3.58							4	13937.4
TGME49_217900-t26_1-p1	hypothetical protein	TGME49_217900	20699	1	6.59																	1	13782
TGME49_230220-t26_1-p1	hypothetical protein	TGME49_230220	136711	4	4.27							3	13765.8
TGME49_306540-t26_1-p1	phosphotransferase enzyme family protein	TGME49_306540	59879	4	10.97											1	1759.04	2	11928.6
TGME49_221410-t26_1-p1	actin-like protein ALP4	TGME49_221410	52155	2	5.5															2	13662.8
TGME49_221190-t26_1-p1	mrna cleavage factor family protein, putative	TGME49_221190	45796	1	3.86															1	13623.7
TGME49_212270-t26_1-p1	hypothetical protein	TGME49_212270	40843	1	3.51																	1	13622.2
TGME49_215040-t26_1-p1	HEAT repeat-containing protein	TGME49_215040	181968	4	2.95					4	13503
TGME49_216050-t26_1-p1	tetratricopeptide repeat-containing protein	TGME49_216050	59519	1	1.79													1	13487.2
TGME49_311290-t26_1-p1	protein tyrosine phosphatase family protein, ptpla protein	TGME49_311290	30563	2	9.12																	2	13366.5
TGME49_268640-t26_1-p1	BING4CT (NUC141) domain-containing protein	TGME49_268640	64502	2	4.23											2	13287.7
TGME49_229940-t26_1-p1	cyclophilin, putative	TGME49_229940	66212	2	4.09											1	13276.7
TGME49_229790-t26_1-p1	hypothetical protein	TGME49_229790	113373	2	2.94							2	13232.7
TGME49_222900-t26_1-p1	phosphoserine phosphatase	TGME49_222900	190477	6	3.76			6	13077.3
TGME49_210730-t26_1-p1	ATP-dependent hsl protease ATP-binding subunit hslU, putative	TGME49_210730	73067	4	9.97											3	6144.59	2	6907.72
TGME49_312260-t26_1-p1	hypothetical protein	TGME49_312260	97345	2	3.17							2	13047.8
TGME49_235160-t26_1-p1	hypothetical protein	TGME49_235160	168307	2	1.68					2	12841.5
TGME49_261080-t26_1-p1	kringle domain-containing protein	TGME49_261080	345982	8	3.1	8	12818.4
TGME49_306380-t26_1-p1	U1 zinc finger protein	TGME49_306380	22084	1	9.3																	1	12304.2
TGME49_203150-t26_1-p1	hypothetical protein	TGME49_203150	187613	1	0.56			1	12291.1
TGME49_299070-t26_1-p1	pyruvate kinase PyKII	TGME49_299070	106814	4	6.28									3	12276.8
TGME49_253520-t26_1-p1	U3 small nucleolar RNA-associated protein 6 protein	TGME49_253520	140504	5	4.86							5	12226.8
TGME49_294980-t26_1-p1	hypothetical protein	TGME49_294980	29244	1	5.19																	1	12150.1
TGME49_237520-t26_1-p1	hypothetical protein	TGME49_237520	114771	2	2.44					2	11148.8							1	812.031
TGME49_315140-t26_1-p1	WD domain, G-beta repeat-containing protein	TGME49_315140	155381	5	5.88					4	11795.1
TGME49_250750-t26_1-p1	tRNA (uracil-5-)-methyltransferase	TGME49_250750	121269	2	1.7							2	11782.2
TGME49_258070-t26_1-p1	hypothetical protein	TGME49_258070	75742	2	3.69									2	11650.2
TGME49_286750-t26_1-p1	MA3 domain-containing protein	TGME49_286750	58969	2	6.02															2	11645.1
TGME49_290920-t26_1-p1	oxidoreductase, 2OG-Fe(II) oxygenase family protein	TGME49_290920	100844	1	1.55							1	11630.6
TGME49_308040-t26_1-p1	ZPR1 zinc finger domain-containing protein	TGME49_308040	62986	2	5.99									2	11542.2
TGME49_265410-t26_1-p1	G-protein beta WD-40 repeat containing protein	TGME49_265410	67366	2	4.78											2	11442.1
TGME49_272520-t26_1-p1	hypothetical protein	TGME49_272520	43708	1	2.99															1	11337.7
TGME49_224890-t26_1-p1	hypothetical protein	TGME49_224890	116709	4	4.65							3	11249.5
TGME49_242290-t26_1-p1	proteasome subunit alpha1, putative	TGME49_242290	28114	2	8.3																	2	11121.7
TGME49_282090-t26_1-p1	hypothetical protein	TGME49_282090	60527	2	4.43													2	11101.5
TGME49_228190-t26_1-p1	eukaryotic initiation factor-3, subunit 5, putative	TGME49_228190	38070	1	2.31																	1	11095.4
TGME49_240590-t26_1-p1	DNA-directed RNA polymerase II RPB5	TGME49_240590	24018	1	6.83																	1	11016.2
TGME49_209260-t26_1-p1	cytochrome c oxidase subunit, putative	TGME49_209260	34707	2	10																	2	10897.7
TGME49_224490-t26_1-p1	polyprenyl synthetase superfamily protein	TGME49_224490	69698	2	2.94									1	8646.97					1	2193.81
TGME49_260500-t26_1-p1	COPI associated protein, putative	TGME49_260500	29924	1	6.3																	1	10668.5
TGME49_223900-t26_1-p1	hypothetical protein	TGME49_223900	110189	1	0.8							1	10658.4
TGME49_294730-t26_1-p1	hypothetical protein	TGME49_294730	217380	3	1.87	1	912.194	2	4025.24	1	3264.47	1	2454.13
TGME49_211670-t26_1-p1	S1 RNA binding domain-containing protein	TGME49_211670	42217	2	7.94	2	10611.9
TGME49_234520-t26_1-p1	U2 snRNP auxilliary factor, large subunit, splicing factor subfamily protein	TGME49_234520	59989	2	3.8											2	10590.5
TGME49_212220-t26_1-p1	hypothetical protein	TGME49_212220	107977	3	4.69							3	10500.5
TGME49_259950-t26_1-p1	carbonate dehydratase, eukaryotic-type domain-containing protein	TGME49_259950	95166	1	1.63									1	10476
TGME49_267500-t26_1-p1	hypothetical protein	TGME49_267500	25697	1	3.48																	1	10313.5
TGME49_287180-t26_1-p1	hypothetical protein	TGME49_287180	239165	5	3.03	1	753.041	5	9525.24
TGME49_272010-t26_1-p1	Gar1 protein RNA binding region protein	TGME49_272010	20931	1	6.19																	1	10158.7
TGME49_268200-t26_1-p1	RNA recognition motif-containing protein	TGME49_268200	66430	3	6.02																	2	10114.7
TGME49_226660-t26_1-p1	hypothetical protein	TGME49_226660	389806	8	2.52	7	8592.8	2	1447.2
TGME49_286120-t26_1-p1	prolyl endopeptidase	TGME49_286120	93071	1	1.33									1	9908.05
TGME49_314410-t26_1-p1	aquarius, putative	TGME49_314410	251136	6	2.89	4	9864.49
TGME49_262730-t26_1-p1	rhoptry protein ROP16	TGME49_262730	76216	1	1.7									1	9839.39
TGME49_246910-t26_1-p1	histone lysine methyltransferase, SET, putative	TGME49_246910	59222	2	4.45													2	9723.19
TGME49_291900-t26_1-p1	Ydr279p family (RNase H2 complex component) protein	TGME49_291900	60030	1	1.82									1	9713.41
TGME49_249030-t26_1-p1	endonuclease/exonuclease/phosphatase family protein	TGME49_249030	60227	1	4.62													1	9537.24
TGME49_205750-t26_1-p1	histone deacetylase complex subunit Sin3	TGME49_205750	87092	2	3.12									2	9406.1
TGME49_313370-t26_1-p1	hypothetical protein	TGME49_313370	174667	4	4.39					2	6691.02	2	2603.96
TGME49_252220-t26_1-p1	tetratricopeptide repeat domain containing protein	TGME49_252220	63343	1	1.59											1	9216.94
TGME49_219700-t26_1-p1	DNA replication licensing factor MCM4, putative	TGME49_219700	111886	1	1.28							1	9186.97
TGME49_243240-t26_1-p1	WD domain, G-beta repeat-containing protein	TGME49_243240	53771	1	1.64													1	9151.79
TGME49_316350-t26_1-p1	hypothetical protein	TGME49_316350	44366	1	2.81															1	9055.42
TGME49_268290-t26_1-p1	DEAD/DEAH box helicase domain-containing protein	TGME49_268290	90270	3	3.9													3	9047.23
TGME49_290340-t26_1-p1	HEAT repeat-containing protein	TGME49_290340	47960	1	1.81			1	9039.49
TGME49_320210-t26_1-p1	WD domain, G-beta repeat domain containing protein	TGME49_320210	56081	3	7.77													1	8976.55
TGME49_308920-t26_1-p1	splicing factor U2AF protein	TGME49_308920	83179	2	4.42													2	8807.16
TGME49_273960-t26_1-p1	chaperonin GroS protein	TGME49_273960	39951	1	2.14																	1	8744.24
TGME49_207770-t26_1-p1	PCI domain-containing protein	TGME49_207770	55463	1	1.57															1	8507.47
TGME49_269710-t26_1-p1	hypothetical protein	TGME49_269710	170389	2	1.55					2	8501.35
TGME49_269770-t26_1-p1	WD domain, G-beta repeat-containing protein	TGME49_269770	121162	1	1.15							1	8463.2
TGME49_247300-t26_1-p1	hypothetical protein	TGME49_247300	95512	1	1.22									1	1449.48	1	5124.9	1	1821.2
TGME49_261520-t26_1-p1	nucleolar GTP-binding protein 1, putative	TGME49_261520	80980	2	2.78									2	8232.25
TGME49_214780-t26_1-p1	hydrolase, NUDIX family protein	TGME49_214780	25262	1	8.18																	1	8056.25
TGME49_311400-t26_1-p1	WD domain, G-beta repeat-containing protein	TGME49_311400	165572	3	2.52					1	8014.17
TGME49_219790-t26_1-p1	pre-mRNA processing factor PRP3	TGME49_219790	76834	2	3.17											2	8010.93
TGME49_240890-t26_1-p1	6-phosphofructokinase	TGME49_240890	154691	1	0.57					1	7992.84
TGME49_280390-t26_1-p1	HEAT repeat-containing protein	TGME49_280390	441040	1	0.22	1	7976.84
TGME49_215590-t26_1-p1	flavoprotein subunit of succinate dehydrogenase	TGME49_215590	72751	2	4.78											2	7948.31
TGME49_320480-t26_1-p1	Rab11b	TGME49_320480	24857	1	5.31																	1	7841.05
TGME49_238150-t26_1-p1	hypothetical protein	TGME49_238150	37063	1	4.58																	1	7718.09
TGME49_226870-t26_1-p1	tubulin gamma chain	TGME49_226870	51784	1	1.95															1	7717.81
TGME49_310950-t26_1-p1	AP2 domain transcription factor AP2XI-3	TGME49_310950	135101	1	0.64					1	7634.63
TGME49_253090-t26_1-p1	DEAD/DEAH box helicase domain-containing protein	TGME49_253090	122312	2	2.07									2	7621
TGME49_200470-t26_1-p1	hypothetical protein	TGME49_200470	65106	2	4.71											2	7590.63
TGME49_218960-t26_1-p1	AP2 domain transcription factor AP2XII-1	TGME49_218960	247703	7	3.99	6	7582.82
TGME49_244570-t26_1-p1	hypothetical protein	TGME49_244570	82720	2	3.37											2	7360.14
TGME49_232350-t26_1-p1	lactate dehydrogenase LDH1	TGME49_232350	35548	1	3.34									1	7289.08
TGME49_249620-t26_1-p1	histone deacetylase HDAC2	TGME49_249620	67482	2	4.49											2	7210.45
TGME49_216730-t26_1-p1	MCM2/3/5 family protein	TGME49_216730	113220	1	1.46							1	7196.71
TGME49_233905-t26_1-p1	histone kinase SNF1, putative	TGME49_233905	82207	1	0.92									1	7170.58
TGME49_214970-t26_1-p1	DNA replication licensing factor, putative	TGME49_214970	117243	2	2.19							2	7095.49
TGME49_318590-t26_1-p1	MRP family domain-containing protein	TGME49_318590	70667	1	1.71									1	7088.56
TGME49_233010-t26_1-p1	cell-cycle-assocaited protein kinase ERK7, putative	TGME49_233010	73113	1	1.18									1	7041.87
TGME49_214590-t26_1-p1	micro-fibrillar-associated protein 1	TGME49_214590	51964	1	2.05													1	6965.12
TGME49_304955-t26_1-p1	serine/threonine specific protein phosphatase	TGME49_304955	303846	3	1.28													3	6699.95
TGME49_255190-t26_1-p1	myosin C	TGME49_255190	132658	2	1.79							2	6687.19
TGME49_293370-t26_1-p1	histone arginine methyltransferase PRMT2	TGME49_293370	139052	2	1.77									1	6636.76
TGME49_204410-t26_1-p1	endonuclease/exonuclease/phosphatase family protein	TGME49_204410	121576	2	2.47							2	6633.9
TGME49_239500-t26_1-p1	proteasome subunit alpha type, putative	TGME49_239500	27937	1	4.76																	1	6612.15
TGME49_210360-t26_1-p1	DEAD (Asp-Glu-Ala-Asp) box polypeptide 41 family protein	TGME49_210360	73228	3	5.78									3	6588.12
TGME49_305920-t26_1-p1	endonuclease III family 1 protein	TGME49_305920	75930	1	1.59													1	6534.59
TGME49_238240-t26_1-p1	bystin protein	TGME49_238240	50445	3	6.62															3	6514.9
TGME49_208830-t26_1-p1	hypothetical protein	TGME49_208830	54771	1	4.75															1	6506.94
TGME49_320630-t26_1-p1	phosphotransferase enzyme family protein	TGME49_320630	69384	1	2.38											1	6203.44
TGME49_321420-t26_1-p1	kelch repeat-containing protein	TGME49_321420	61088	1	2.17											1	6068.03
TGME49_233310-t26_1-p1	peptidase D, putative	TGME49_233310	67077	1	2.5													1	5982.89
TGME49_255890-t26_1-p1	pyridine nucleotide-disulfide oxidoreductase domain-containing protein	TGME49_255890	85898	3	4.7									1	5945.24
TGME49_276180-t26_1-p1	histone acetyltransferase TAF1/250	TGME49_276180	296271	4	1.73	4	5830.71
TGME49_248740-t26_1-p1	hypothetical protein	TGME49_248740	134977	1	0.81			1	5808.48
TGME49_234420-t26_1-p1	ATPase, AAA family protein	TGME49_234420	66807	1	1.7											1	5787.88
TGME49_253900-t26_1-p1	parasite porphobilinogen synthase PBGS	TGME49_253900	71374	1	3.04															1	5760.62
TGME49_217550-t26_1-p1	hypothetical protein	TGME49_217550	24743	1	6.44																	1	5754.3
TGME49_294770-t26_1-p1	Armadillo/beta-catenin family repeat-containing protein	TGME49_294770	74145	1	2.39									1	5720.83
TGME49_213770-t26_1-p1	Superkiller viralicidic activity 2 family 2, putative	TGME49_213770	135032	2	2.65					2	5578.37
TGME49_313100-t26_1-p1	signal recognition particle SRP54 protein	TGME49_313100	62791	1	3.09													1	5435.27
TGME49_306410-t26_1-p1	hypothetical protein	TGME49_306410	118055	1	0.75							1	5358.85
TGME49_205130-t26_1-p1	hypothetical protein	TGME49_205130	518663	3	0.64											2	4391.89	1	893.969
TGME49_240060-t26_1-p1	hypothetical protein	TGME49_240060	88533	1	2.61											1	1601.53	1	3624.04
TGME49_250820-t26_1-p1	hypothetical protein	TGME49_250820	120889	1	1.12					1	5216.56
TGME49_238510-t26_1-p1	hypothetical protein	TGME49_238510	116255	1	0.83							1	5208.8
TGME49_216620-t26_1-p1	EF hand domain-containing protein	TGME49_216620	411981	1	0.27					1	5082.83
TGME49_312110-t26_1-p1	apicoplast-associated thioredoxin family protein Atrx1	TGME49_312110	86834	1	1.14															1	5043.82
TGME49_206510-t26_1-p1	toxolysin TLN4	TGME49_206510	246741	2	1.07															1	4272.02	1	762.538
TGME49_318140-t26_1-p1	SART-1 family protein	TGME49_318140	97681	1	1.74							1	5020.52
TGME49_209890-t26_1-p1	hypothetical protein	TGME49_209890	22011	1	8.29																	1	5001.19
TGME49_275680-t26_1-p1	hypothetical protein	TGME49_275680	69225	1	3.02									1	4948.68
TGME49_207430-t26_1-p1	ATP-dependent RNA helicase DDX1, putative	TGME49_207430	82792	3	5.47									3	4783.85
TGME49_202950-t26_1-p1	hypothetical protein	TGME49_202950	151800	1	0.85					1	4686.3
TGME49_278800-t26_1-p1	zinc finger protein 36 family 3 protein	TGME49_278800	218357	1	0.48									1	4659.71
TGME49_269410-t26_1-p1	hypothetical protein	TGME49_269410	24125	1	10.14																	1	4595.5
TGME49_320010-t26_1-p1	hypothetical protein	TGME49_320010	98244	1	1.14													1	4594.88
TGME49_305780-t26_1-p1	5'-3' exoribonuclease, putative	TGME49_305780	138629	1	1.21					1	4501.72
TGME49_297720-t26_1-p1	trehalose-phosphatase	TGME49_297720	136691	1	0.74					1	4485.53
TGME49_286240-t26_1-p1	kelch repeat protein, putative	TGME49_286240	67371	1	1.6											1	4401.05
TGME49_239480-t26_1-p1	RNB family domain-containing protein	TGME49_239480	129842	1	1.12					1	1861.53	1	2518.85
TGME49_318330-t26_1-p1	histone lysine acetyltransferase MYST-A	TGME49_318330	53257	2	6.58															2	4271.12
TGME49_319560-t26_1-p1	microneme protein MIC3	TGME49_319560	40528	2	10.44																	1	4112.02
TGME49_309600-t26_1-p1	hypothetical protein	TGME49_309600	106522	1	1.56											1	4042.77
TGME49_280800-t26_1-p1	SWI2/SNF2 SRCAP/Ino80	TGME49_280800	316987	2	1.04							2	3992.24
TGME49_260320-t26_1-p1	Noc2p family protein	TGME49_260320	115320	1	0.87							1	3963.23
TGME49_257560-t26_1-p1	WD domain, G-beta repeat-containing protein	TGME49_257560	109902	1	0.98							1	3928.04
TGME49_321450-t26_1-p1	Myb family DNA-binding domain-containing protein	TGME49_321450	437021	3	0.64	3	3911.27
TGME49_269690-t26_1-p1	hypothetical protein	TGME49_269690	94304	1	1.16											1	3899.38
TGME49_218590-t26_1-p1	protein phosphatase 2C domain-containing protein	TGME49_218590	97637	1	1.11											1	3887.23
TGME49_245500-t26_1-p1	dipeptidyl peptidase iv (dpp iv) n-terminal region domain-containing protein	TGME49_245500	205660	2	1.12			1	3871.16
TGME49_219800-t26_1-p1	vacuolar ATP synthase subunit b, putative	TGME49_219800	56614	1	2.77															1	3870.23
TGME49_265840-t26_1-p1	hypothetical protein	TGME49_265840	149066	1	0.9					1	3844.99
TGME49_235170-t26_1-p1	ATPase, AAA family protein	TGME49_235170	138106	1	0.95					1	3811.79
TGME49_214210-t26_1-p1	rRNA pseudouridine synthase	TGME49_214210	56744	2	2.77													2	3809.75
TGME49_203290-t26_1-p1	hypothetical protein	TGME49_203290	35957	1	2.73																	1	3792.23
TGME49_310630-t26_1-p1	hypothetical protein	TGME49_310630	57003	1	1.75													1	3731.98
TGME49_223930-t26_1-p1	RNA recognition motif-containing protein	TGME49_223930	40672	1	2.62															1	3677.73
TGME49_297530-t26_1-p1	DNA-directed RNA polymerase I RPA2	TGME49_297530	153521	1	0.94					1	3612.22
TGME49_254220-t26_1-p1	hypothetical protein	TGME49_254220	84221	1	1.09									1	2053.5			1	1523.32
TGME49_233000-t26_1-p1	KOW motif domain-containing protein	TGME49_233000	126247	1	0.77							1	3558.76
TGME49_251950-t26_1-p1	ribosomal protein l7/l12 c-terminal domain-containing protein	TGME49_251950	36757	1	3.95																	1	3536.71
TGME49_300310-t26_1-p1	26S proteasome regulatory subunit, S6a family AAA ATpase	TGME49_300310	47788	3	7.96															2	3521.51
TGME49_304520-t26_1-p1	hypothetical protein	TGME49_304520	110592	1	1.28							1	3500.18
TGME49_274120-t26_1-p1	hypothetical protein	TGME49_274120	74290	2	3.41									2	3495.55
TGME49_262140-t26_1-p1	chain a, pp2a-specific methylesterase apo form (pme), putative	TGME49_262140	49990	1	3.1															1	3463.53
TGME49_278440-t26_1-p1	SWI2/SNF2 Brahma-like putative	TGME49_278440	285454	4	1.65	2	2996.52	1	466.614
TGME49_278470-t26_1-p1	hypothetical protein	TGME49_278470	66650	1	2.36											1	3441.25
TGME49_258240-t26_1-p1	chromodomain helicase DNA binding protein CHD1/SWI2/SNF2	TGME49_258240	271394	1	0.48	1	3436.92
TGME49_262150-t26_1-p1	kelch repeat and K+ channel tetramerisation domain containing protein	TGME49_262150	89048	1	2.2									1	3427.22
TGME49_226320-t26_1-p1	hypothetical protein	TGME49_226320	73664	1	1.94									1	3362.96
TGME49_280560-t26_1-p1	selenide, water dikinase	TGME49_280560	137875	1	0.85	1	751.606					1	1860.7	1	750.214
TGME49_222100-t26_1-p1	hypothetical protein	TGME49_222100	128318	2	1.93											2	3235.22
TGME49_298610-t26_1-p1	GYF domain-containing protein	TGME49_298610	237896	4	2.66	1	240.598					1	816.847	1	1061.69	1	297.45			1	507.922	1	246.458
TGME49_221870-t26_1-p1	hypothetical protein	TGME49_221870	144135	1	1.46					1	3119.47
TGME49_253750-t26_1-p1	PLU-1 family protein	TGME49_253750	856703	12	2.19	7	2723.2	1	386.473
TGME49_217460-t26_1-p1	glutaminyl-tRNA synthetase (GlnRS)	TGME49_217460	95527	1	2.44																	1	3088.01
TGME49_316700-t26_1-p1	uridine kinase	TGME49_316700	65067	1	2.15											1	3087.55
TGME49_297960-t26_1-p1	rhoptry neck protein RON6	TGME49_297960	238614	1	0.4											1	3086.54
TGME49_244000-t26_1-p1	DEAD/DEAH box helicase domain-containing protein	TGME49_244000	110544	2	2.21							2	3055.79
TGME49_289970-t26_1-p1	hypothetical protein	TGME49_289970	24448	1	3.88																	1	3000.53
TGME49_261260-t26_1-p1	histone lysine demethylase JMJD6a	TGME49_261260	71271	1	1.56									1	2995.39
TGME49_295060-t26_1-p1	exonuclease	TGME49_295060	57462	2	6.15													2	2995.15
TGME49_219320-t26_1-p1	acid phosphatase GAP50	TGME49_219320	46607	1	3.48															1	2988.59
TGME49_246080-t26_1-p1	NAD dependent epimerase/dehydratase family protein	TGME49_246080	69733	1	1.57									1	2951.94
TGME49_273580-t26_1-p1	hypothetical protein	TGME49_273580	155196	1	0.63					1	2945.09
TGME49_321650-t26_1-p1	hypothetical protein	TGME49_321650	153573	2	1.89							1	2942.1
TGME49_273920-t26_1-p1	aldose reductase, putative	TGME49_273920	58704	1	1.86													1	2903.65
TGME49_310900-t26_1-p1	AP2 domain transcription factor AP2XI-2	TGME49_310900	232852	4	2.76	3	2896.78
TGME49_254510-t26_1-p1	ankyrin repeat-containing protein	TGME49_254510	65956	1	2.07											1	2866.97
TGME49_214240-t26_1-p1	bromodomain-containing protein	TGME49_214240	320589	3	1.35	3	2857.34
TGME49_278900-t26_1-p1	protein kinase, putative	TGME49_278900	64043	1	1.67											1	2822.37
TGME49_279390-t26_1-p1	proliferation-associated protein 2G4, putative	TGME49_279390	50342	1	2.38															1	2816.06
TGME49_276890-t26_1-p1	hypothetical protein	TGME49_276890	129509	1	0.94							1	2755.88
TGME49_219860-t26_1-p1	replication licensing factor, putative	TGME49_219860	108256	1	1.65							1	2662.25
TGME49_261060-t26_1-p1	diphthamide biosynthesis protein 2-related domain-containing protein	TGME49_261060	60933	1	1.97													1	2650.58
TGME49_215430-t26_1-p1	hypothetical protein	TGME49_215430	27555	1	5.33																	1	2640.53
TGME49_285250-t26_1-p1	hypothetical protein	TGME49_285250	121221	1	0.78							1	2579.77
TGME49_220930-t26_1-p1	hypothetical protein	TGME49_220930	74168	1	1.75															1	2434.43
TGME49_247450-t26_1-p1	hypothetical protein	TGME49_247450	245871	3	2.82	1	206.615	1	995.125	1	1205.66
TGME49_249680-t26_1-p1	RNA polymerase II associated Paf1 complex component PAF1	TGME49_249680	61780	1	2.6									1	2392.77
TGME49_246510-t26_1-p1	protein phosphatase 2a regulatory b subunit (b56 family) protein	TGME49_246510	64837	1	1.9													1	2379.46
TGME49_232520-t26_1-p1	brix domain-containing protein	TGME49_232520	43252	1	3.24																	1	2379.41
TGME49_291820-t26_1-p1	RNA helicase (UPF2 interacting domain) protein	TGME49_291820	163448	1	0.78					1	2305.81
TGME49_220160-t26_1-p1	WD domain-containing protein	TGME49_220160	59413	1	4.51													1	2295.76
TGME49_291180-t26_1-p1	hypothetical protein	TGME49_291180	574474	6	1.57	5	1494.94	1	180.238	1	613.619
TGME49_312840-t26_1-p1	hypothetical protein	TGME49_312840	119652	1	0.91							1	2261.14
TGME49_290850-t26_1-p1	WD-40 repeat protein	TGME49_290850	58309	1	1.92															1	2248.87
TGME49_253370-t26_1-p1	hypothetical protein	TGME49_253370	216510	1	0.61					1	2237.72
TGME49_315170-t26_1-p1	O-phosphoseryl-tRNA(Sec) selenium transferase	TGME49_315170	66776	1	1.94											1	2206.41
TGME49_255300-t26_1-p1	hypothetical protein	TGME49_255300	265044	4	2.72	4	2193.63
TGME49_230710-t26_1-p1	cell division protein CDC48	TGME49_230710	143885	1	0.98					1	2162.79
TGME49_227450-t26_1-p1	hydrolase, NUDIX family protein	TGME49_227450	216621	1	0.53			1	706.609	1	823.471	1	610.479
TGME49_260250-t26_1-p1	cyclin domain protein, cyclin H family protein	TGME49_260250	65648	1	1.83											1	2126.42
TGME49_278830-t26_1-p1	glucose-6-phosphate 1-dehydrogenase	TGME49_278830	98280	1	1.03	1	580.479					1	1537
TGME49_244880-t26_1-p1	DNA-directed RNA polymerase I RPA1	TGME49_244880	302092	2	0.69	2	2095.21
TGME49_254470-t26_1-p1	hypothetical protein	TGME49_254470	80478	1	1.91											1	2081.78
TGME49_259830-t26_1-p1	diacylglycerol kinase catalytic domain-containing protein	TGME49_259830	69589	1	1.27													1	2028.62
TGME49_266030-t26_1-p1	pre-mRNA splicing factor, putative	TGME49_266030	63045	1	2.48													1	2019.29
TGME49_313130-t26_1-p1	hypothetical protein	TGME49_313130	133693	1	1					1	1968.87
TGME49_207370-t26_1-p1	hypothetical protein	TGME49_207370	143073	1	1.31					1	1961.15
TGME49_214090-t26_1-p1	signal peptidase	TGME49_214090	203484	1	0.7			1	1924.79
TGME49_225200-t26_1-p1	hypothetical protein	TGME49_225200	179694	1	0.61									1	1903.03
TGME49_251850-t26_1-p1	serine/threonine protein phosphatase	TGME49_251850	117356	1	1.74							1	1851.59
TGME49_230860-t26_1-p1	hypothetical protein	TGME49_230860	96993	1	1.22							1	1838.32
TGME49_258030-t26_1-p1	DNA polymerase	TGME49_258030	139494	1	0.71					1	1813.03
TGME49_267710-t26_1-p1	CPSF A subunit region protein	TGME49_267710	224032	1	0.53			1	1784.7
TGME49_241830-t26_1-p1	peptidyl-prolyl cis-trans isomerase	TGME49_241830	64463	1	2.26											1	1772.41
TGME49_227390-t26_1-p1	hypothetical protein	TGME49_227390	116123	1	2.35							1	1768.11
TGME49_294630-t26_1-p1	hypothetical protein	TGME49_294630	95709	1	2.05									1	1722.47
TGME49_224980-t26_1-p1	hypothetical protein	TGME49_224980	122255	1	1.8							1	1722.21
TGME49_214830-t26_1-p1	hypothetical protein	TGME49_214830	163974	1	0.6					1	1711.32
TGME49_310150-t26_1-p1	AMP-binding enzyme domain-containing protein	TGME49_310150	95937	2	3									1	1660.11
TGME49_226350-t26_1-p1	hypothetical protein	TGME49_226350	168114	1	0.67					1	1650.2
TGME49_213420-t26_1-p1	RAP domain-containing protein	TGME49_213420	78562	1	1.4											1	1647.92
TGME49_246978-t26_1-p1	hypothetical protein	TGME49_246978	160891	2	1.57							1	1641.12
TGME49_260200-t26_1-p1	helicase associated domain (ha2) protein	TGME49_260200	141771	1	1.56					1	1634.61
TGME49_225930-t26_1-p1	triose-phosphate isomerase TPI-I	TGME49_225930	27890	1	5.93																	1	1629.14
TGME49_209108-t26_1-p1	hypothetical protein	TGME49_209108	41014	1	2.75													1	1618.17
TGME49_310118-t26_1-p1	hypothetical protein	TGME49_310118	62976	1	2.75									1	1596.24
TGME49_308890-t26_1-p1	transcription elongation factor SPT6	TGME49_308890	366029	1	0.34	1	281.024	1	1298.91
TGME49_234610-t26_1-p1	WD-40 repeat protein	TGME49_234610	76499	1	2.28									1	1508.52
TGME49_309250-t26_1-p1	hypothetical protein	TGME49_309250	407391	1	0.24									1	1487.24
TGME49_207760-t26_1-p1	DnaJ C terminal region domain-containing protein	TGME49_207760	161644	1	0.79											1	1479.65
TGME49_313270-t26_1-p1	hypothetical protein	TGME49_313270	281362	1	0.64					1	1468.23
TGME49_269950-t26_1-p1	hypothetical protein	TGME49_269950	104680	1	1.27													1	1451.59
TGME49_313670-t26_1-p1	adaptin n terminal region domain-containing protein	TGME49_313670	107006	1	1.68									1	1431.45
TGME49_268590-t26_1-p1	rhomboid protease ROM4	TGME49_268590	72363	1	2.71											1	1417.51
TGME49_247195-t26_1-p1	microneme protein MIC15	TGME49_247195	319972	1	0.27	1	1397.59
TGME49_254690-t26_1-p1	phospholipase/carboxylesterase	TGME49_254690	54236	1	2.01															1	1384.06
TGME49_201790-t26_1-p1	FHA domain-containing protein	TGME49_201790	62656	1	2.7											1	1383.78
TGME49_209100-t26_1-p1	PUB domain-containing protein	TGME49_209100	68150	1	2.69									1	1375.54
TGME49_273150-t26_1-p1	zinc finger, C3HC4 type (RING finger) domain-containing protein	TGME49_273150	78603	1	2.55													1	1374.63
TGME49_240710-t26_1-p1	RNA recognition motif-containing protein	TGME49_240710	102231	2	3.77							1	1373.52
TGME49_277720-t26_1-p1	GDA1/CD39 (nucleoside phosphatase) family protein	TGME49_277720	92539	1	1.98											1	1354.53
TGME49_253020-t26_1-p1	hypothetical protein	TGME49_253020	51622	1	2.58															1	1308.23
TGME49_240090-t26_1-p1	rhoptry kinase family protein ROP34, putative	TGME49_240090	61668	1	1.81															1	1285.74
TGME49_270865-t26_1-p1	adenylate cyclase, putative	TGME49_270865	222746	1	0.69			1	1269.68
TGME49_221200-t26_1-p1	CW-type Zinc Finger protein	TGME49_221200	296265	3	3.83	2	802.042	1	437.913
TGME49_226510-t26_1-p1	Sec23/Sec24 trunk domain-containing protein	TGME49_226510	165235	1	1.1					1	1235.67
TGME49_312280-t26_1-p1	pre-mRNA-splicing factor ATP-dependent RNA helicase, putative	TGME49_312280	136385	1	1					1	1235.1
TGME49_203950-t26_1-p1	Myb family DNA-binding domain-containing protein	TGME49_203950	264435	1	1.15			1	428.962	1	765.421
TGME49_235420-t26_1-p1	hypothetical protein	TGME49_235420	423319	3	1.14	2	1192.27
TGME49_315720-t26_1-p1	Smg-4/UPF3 family protein	TGME49_315720	62257	1	3.37													1	1082.51
TGME49_320160-t26_1-p1	hypothetical protein	TGME49_320160	201726	2	1.29			1	1045.06
TGME49_252880-t26_1-p1	hypothetical protein	TGME49_252880	339079	1	0.38											1	1012.35
TGME49_243250-t26_1-p1	myosin H	TGME49_243250	169659	2	2.05					1	1004.73
TGME49_222430-t26_1-p1	HECT-domain (ubiquitin-transferase) domain-containing protein	TGME49_222430	180697	1	0.89					1	971.156
TGME49_234360-t26_1-p1	DNA topoisomerase I, putative	TGME49_234360	99706	1	1.8							1	933.883
TGME49_224260-t26_1-p1	PHD-finger domain-containing protein	TGME49_224260	602434	3	0.99	2	922.42
TGME49_305270-t26_1-p1	hypothetical protein	TGME49_305270	82315	1	1.63									1	921.456
TGME49_205558-t26_1-p1	NAC domain-containing protein	TGME49_205558	20507	1	8.47																	1	897.936
TGME49_214620-t26_1-p1	hypoxia- inducible factor prolyl hydroxylase (phd2), putative	TGME49_214620	64160	1	1.91											1	857.189
TGME49_256060-t26_1-p1	nucleosome assembly protein (nap) protein	TGME49_256060	89465	1	2.22							1	825.871
TGME49_318525-t26_1-p1	hypothetical protein	TGME49_318525	188815	1	2.23			1	824.65
TGME49_225690-t26_1-p1	hypothetical protein	TGME49_225690	194254	1	0.99	1	251.467	1	568.93
TGME49_205360-t26_1-p1	hypothetical protein	TGME49_205360	293162	1	0.35													1	795.48
TGME49_251630-t26_1-p1	slc30a2 protein	TGME49_251630	99616	1	2.07											1	759.167
TGME49_202870-t26_1-p1	SAP domain-containing protein	TGME49_202870	55645	2	4.15																	1	758.825
TGME49_273560-t26_1-p1	kinesin heavy chain, putative	TGME49_273560	181383	1	0.67			1	754.463
TGME49_263650-t26_1-p1	pre-mRNA-processing protein 8, putative	TGME49_263650	117535	1	1.63							1	689.071
TGME49_235905-t26_1-p1	ribonuclease z, putative	TGME49_235905	116306	1	1.49							1	666.695
TGME49_217530-t26_1-p1	hypothetical protein	TGME49_217530	63768	1	1.91													1	647.166
TGME49_286160-t26_1-p1	non-specific serine/threonine protein kinase	TGME49_286160	310366	1	0.32	1	642.024
TGME49_308810-t26_1-p1	rhoptry neck protein RON9	TGME49_308810	158583	1	1			1	641.375
TGME49_218070-t26_1-p1	hypothetical protein	TGME49_218070	186095	1	0.4			1	627.309
TGME49_232190-t26_1-p1	Sec7 domain-containing protein	TGME49_232190	354634	1	0.36	1	625.762
TGME49_222300-t26_1-p1	hypothetical protein	TGME49_222300	159728	1	1.49					1	610.719
TGME49_211890-t26_1-p1	RAP domain-containing protein	TGME49_211890	572334	1	0.15																	1	598.048
TGME49_268330-t26_1-p1	hypothetical protein	TGME49_268330	310848	1	0.3	1	595.888
TGME49_288400-t26_1-p1	LETM1 family protein	TGME49_288400	119992	1	1.28							1	540.783
TGME49_300260-t26_1-p1	threonyl-tRNA synthetase family protein	TGME49_300260	95898	1	1.54											1	499.501
TGME49_234900-t26_1-p1	PHD-finger domain-containing protein	TGME49_234900	480654	2	0.6	2	487.488
TGME49_224510-t26_1-p1	hypothetical protein	TGME49_224510	226333	1	0.66			1	404.812
TGME49_293000-t26_1-p1	3'5'-cyclic nucleotide phosphodiesterase domain-containing protein	TGME49_293000	243909	1	0.54	1	394.958
TGME49_315860-t26_1-p1	EF hand domain-containing protein	TGME49_315860	690212	4	0.72	2	361.348
TGME49_221610-t26_1-p1	ubiquitin carboxyl-terminal hydrolase	TGME49_221610	87237	1	1.76															1	359.468
TGME49_310310-t26_1-p1	WD domain, G-beta repeat-containing protein	TGME49_310310	76038	1	2.15									1	356.589
TGME49_311470-t26_1-p1	rhoptry neck protein RON5	TGME49_311470	187410	1	1.23																	1	318.827
TGME49_217790-t26_1-p1	S1 RNA binding domain-containing protein	TGME49_217790	268151	1	0.67			1	298.315
TGME49_258970-t26_1-p1	hypothetical protein	TGME49_258970	327077	1	0.26	1	291.651
TGME49_269180-t26_1-p1	MIF4G domain-containing protein	TGME49_269180	273011	1	0.94											1	266.028
TGME49_234230-t26_1-p1	hypothetical protein	TGME49_234230	490822	2	0.63	1	256.979
TGME49_237280-t26_1-p1	TLD protein	TGME49_237280	233098	1	0.73			1	249.488
TGME49_248290-t26_1-p1	WD domain, G-beta repeat-containing protein	TGME49_248290	358181	1	0.81			1	145.73
TGME49_318240-t26_1-p1	Tubulin-tyrosine ligase family protein	TGME49_318240	317252	1	0.38									1	128.115
TGME49_311230-t26_1-p1	hypothetical protein	TGME49_311230	504758	3	1.3			1	102.216
TGME49_306660-t26_1-p1	RNA pseudouridine synthase superfamily protein	TGME49_306660	676329	1	0.29	1	76.6396
TGME49_286230-t26_1-p1	hypothetical protein	TGME49_286230	279300	1	0.88	1	57.0308
TGME49_208320-t26_1-p1	polynucleotide kinase 3 phosphatase	TGME49_208320	77294	1	2.13
TGME49_209960-t26_1-p1	glycosyltransferase	TGME49_209960	188848	1	0.64
TGME49_213040-t26_1-p1	hypothetical protein	TGME49_213040	197072	1	0.49
TGME49_213890-t26_1-p1	Myb family DNA-binding domain-containing protein	TGME49_213890	118161	1	1.69
TGME49_215560-t26_1-p1	histone arginine methyltransferase PRMT5	TGME49_215560	107092	2	2.15
TGME49_216810-t26_1-p1	5'-nucleotidase, C-terminal domain-containing protein	TGME49_216810	78348	1	1.55
TGME49_216920-t26_1-p1	mediator complex subunit MED8	TGME49_216920	24778	1	6.79
TGME49_219550-t26_1-p1	dihydrolipoyllysine-residue succinyltransferase component of oxoglutarate dehydrogenase	TGME49_219550	50126	1	1.28
TGME49_221400-t26_1-p1	hypothetical protein	TGME49_221400	210682	1	0.8
TGME49_223880-t26_1-p1	zinc finger, C3HC4 type (RING finger) domain-containing protein	TGME49_223880	407225	1	0.49
TGME49_224150-t26_1-p1	hypothetical protein	TGME49_224150	138041	1	1.77
TGME49_225420-t26_1-p1	histidine triad domain-containing protein	TGME49_225420	24006	1	7.69
TGME49_229030-t26_1-p1	hypothetical protein	TGME49_229030	25424	1	4.39
TGME49_232380-t26_1-p1	WD domain, G-beta repeat-containing protein	TGME49_232380	134254	1	0.57
TGME49_235980-t26_1-p1	ARIADNE family protein	TGME49_235980	74992	1	1.04
TGME49_236210-t26_1-p1	peptidase M16 family potein, putative	TGME49_236210	56916	2	5.5
TGME49_238010-t26_1-p1	ribosomal protein RPL23A	TGME49_238010	18562	1	10.18
TGME49_239930-t26_1-p1	beta-catenin family protein 1, putative	TGME49_239930	73345	1	2.52
TGME49_244290-t26_1-p1	adapter-related protein	TGME49_244290	119953	1	1.34
TGME49_257350-t26_1-p1	eukaryotic translation initiation factor, putative	TGME49_257350	89776	1	1.1
TGME49_264880-t26_1-p1	NEDD8-activating enzyme E1 catalytic subunit	TGME49_264880	63973	1	2.91
TGME49_269650-t26_1-p1	FFD and TFG box motifs protein	TGME49_269650	51441	1	2.24
TGME49_288840-t26_1-p1	hypothetical protein	TGME49_288840	70722	1	1.23
TGME49_289820-t26_1-p1	TBC domain-containing protein	TGME49_289820	114283	1	1.34
TGME49_290840-t26_1-p1	serine protease	TGME49_290840	102740	1	1.25
TGME49_291930-t26_1-p1	RNA recognition motif-containing protein	TGME49_291930	73118	1	1.42
TGME49_294710-t26_1-p1	RNA recognition motif-containing protein	TGME49_294710	122114	1	1.65
TGME49_295000-t26_1-p1	hypothetical protein	TGME49_295000	110507	1	1.23
TGME49_295710-t26_1-p1	HECT-domain (ubiquitin-transferase) domain-containing protein	TGME49_295710	851253	2	0.33
TGME49_304760-t26_1-p1	RNA recognition motif-containing protein	TGME49_304760	147175	2	1.95
TGME49_312380-t26_1-p1	tetratricopeptide repeat-containing protein	TGME49_312380	59689	1	3.14
TGME49_312820-t26_1-p1	hypothetical protein	TGME49_312820	60782	1	2.47
TGME49_313010-t26_1-p1	DEAD (Asp-Glu-Ala-Asp) box polypeptide DDX6	TGME49_313010	53434	1	2.53
TGME49_313810-t26_1-p1	transcription initiation factor TFIID complex subunit TAF8	TGME49_313810	66966	1	1.97
L0R5A1_HUMAN	Alternative protein CSF2RB	CSF2RB	11646	1	7.41					1	1.5521e+07			1	8.61651e+06
A0A5C2G1L1_HUMAN	IGL c3022_light_IGKV2D-29_IGKJ2 (Fragment)		11978	3	20.91											1	121240			1	31687.2	3	15502200
A0A5C2G6R6_HUMAN	IGL c2123_light_IGKV2D-24_IGKJ1 (Fragment)		12138	2	14.29																	2	1.05068e+07
A0A024R1N1_HUMAN	Myosin, heavy polypeptide 9, non-muscle, isoform CRA_a	MYH9	226532	120	53.47	30	132984	94	2.52171e+06	47	531403	28	128230	20	136864	11	37366.7			1	160.596
ANM5_HUMAN	Protein arginine N-methyltransferase 5	PRMT5	72684	20	33.28	1	20692.8							3	35706.2	19	1.90076e+06
BIP_HUMAN	Endoplasmic reticulum chaperone BiP	HSPA5	72333	31	42.81									25	1137262	19	703398
V9HWE1_HUMAN	Vimentin	HEL113	53652	18	44.42															17	1.43175e+06
A0A024R3X4_HUMAN	60 kDa chaperonin (Fragment)	HSPD1	61055	17	39.09													16	1.19879e+06
H7C086_HUMAN	ATP synthase subunit O, mitochondrial (Fragment)	ATP5PO	8132	1	14.86											1	654297
MYH10_HUMAN	Myosin-10	MYH10	228999	61	36.03	1	10131	45	521266	7	28967.8	6	27007.8			1	373.18
A0A024R8S5_HUMAN	Protein disulfide-isomerase	P4HB	57116	13	25.79					3	24272.4	2	20724.1					12	473498
Q9H7M3_HUMAN	FLJ00047 protein (Fragment)	FLJ00047	9327	1	9.88									1	407940
H7C573_HUMAN	Peroxisomal acyl-coenzyme A oxidase 2 (Fragment)	ACOX2	1479	1	61.54	1	355629
Q5SU16_HUMAN	Tubulin beta chain	TUBB	49671	13	27.48															9	328716
A0A024R2Y3_HUMAN	HCG2039481, isoform CRA_a	hCG_2039481	61012	1	1.81							1	327043
A0A1Z1VXF2_HUMAN	CD44 antigen (Fragment)	CD44	21862	2	11.06									2	166848	2	150304
A0A087X0S5_HUMAN	Collagen alpha-1(VI) chain	COL6A1	108339	7	9.26							7	258016
CO6A3_HUMAN	Collagen alpha-3(VI) chain	COL6A3	343669	50	17.88	47	189809	11	19704.7
5NTD_HUMAN	5'-nucleotidase	NT5E	63368	7	15.33											7	193616
B3KRY5_HUMAN	cDNA FLJ35087 fis, clone PLACE6005546, highly similar to Polymerase I and transcript release factor		39045	2	8.12															2	192550
COCA1_HUMAN	Collagen alpha-1(XII) chain	COL12A1	333147	39	15.15	38	183542	2	5521.86
A0A024R9Q1_HUMAN	Thrombospondin 1, isoform CRA_a	THBS1	129353	9	9.15	1	1269.62			7	95930.3	7	84290.9			1	824.304
E9PQW2_HUMAN	NADH-cytochrome b5 reductase 2 (Fragment)	CYB5R2	21475	1	6.88	1	22263.9	1	159750
A0A087WVQ6_HUMAN	Clathrin heavy chain	CLTC	192058	15	10.18					14	157760
FLNA_HUMAN	Filamin-A	FLNA	280739	31	17.23	29	115539	10	24073.4	2	3366.75
M0QXN8_HUMAN	Zinc finger protein 114 (Fragment)	ZNF114	12644	1	8.77									1	140113
B7Z9B8_HUMAN	cDNA FLJ56912, highly similar to Fibulin-2		129384	9	10.5					5	81585.5	4	48663.7					1	2236.01
AL1A1_HUMAN	Retinal dehydrogenase 1	ALDH1A1	54862	4	9.78															4	127770
H3BPS0_HUMAN	V-type proton ATPase subunit d 1 (Fragment)	ATP6V0D1	7994	1	12.68			1	118236
A0A087X054_HUMAN	Hypoxia up-regulated protein 1	HYOU1	104779	8	11.31							8	116566
B4DDR2_HUMAN	Major vault protein		98302	7	10.07							7	98614.7
A0A286YEY4_HUMAN	Immunoglobulin heavy constant gamma 2 (Fragment)	IGHG2	43806	1	2.28															1	93641.1
A0A024R884_HUMAN	Tenascin C (Hexabrachion), isoform CRA_a	TNC	240909	8	4.54	5	16383.7	1	1006.61	6	73703.4
ATPB_HUMAN	ATP synthase subunit beta, mitochondrial	ATP5F1B	56560	8	18.53															6	90250.2
A0A0S2Z2Z6_HUMAN	Annexin (Fragment)	ANXA6	75873	14	23.18									14	89779.3
P4HA1_HUMAN	Prolyl 4-hydroxylase subunit alpha-1	P4HA1	61049	4	9.74													4	87630.8
PGS2_HUMAN	Decorin	DCN	39747	2	6.69									2	84205.8
A0A024R6P0_HUMAN	Serpin peptidase inhibitor, clade A (Alpha-1 antiproteinase, antitrypsin), member 3, isoform CRA_c	SERPINA3	47651	1	2.6	1	12235.2					1	14264.1	1	9175.71	1	13435.9	1	11489.8	1	10544.5	1	8261.37
A0A024R6C9_HUMAN	Dihydrolipoyllysine-residue succinyltransferase component of 2-oxoglutarate dehydrogenase complex, mitochondrial	DLST	48755	5	9.27															5	78951
A0A590UJJ6_HUMAN	Histone H3	H3-3A	13655	1	5.83																	1	75228.2
GABT_HUMAN	4-aminobutyrate aminotransferase, mitochondrial	ABAT	56439	1	1.6					1	74780.6
F2Z2U4_HUMAN	Transformation/transcription domain-associated protein	TRRAP	436138	1	0.21			1	72740.5	1	1982.17
A0A384MDP3_HUMAN	Epididymis secretory sperm binding protein		108579	5	5.59					1	13423.6	4	60748.1
B2RDF2_HUMAN	Pescadillo homolog	PES1	68003	1	2.21																	1	74080.4
A0A384MQX1_HUMAN	Epididymis secretory sperm binding protein		74139	7	13.7									3	19541.9	4	48183.3
B3KTA9_HUMAN	cDNA FLJ37974 fis, clone CTONG2010024, highly similar to Homo sapiens radial spokehead-like 3 (RSHL3), mRNA		58443	1	1.96																	1	67370.2
B4DQF8_HUMAN	Lysyl oxidase homolog		42437	3	7.43															1	23534.2	2	40827.5
A0A0D9SFV8_HUMAN	Chromodomain-helicase-DNA-binding protein 2 (Fragment)	CHD2	8215	1	18.31													1	61704.8
A0A6Q8PFK8_HUMAN	Heat shock protein beta-1	HSPB1	21882	4	26.77																	3	53450.2
A0A024RC61_HUMAN	Aminopeptidase	ANPEP	109540	9	9.72					5	50926.6
A0A024R326_HUMAN	60S ribosomal protein L29	RPL29	17553	2	10.19																	2	50515.2
A8K168_HUMAN	Malic enzyme		64136	1	3.15															1	47806.1
A0A384NL29_HUMAN	Superoxide dismutase		24750	3	20.27																	3	45133.6
D3DTH7_HUMAN	Myosin IC, isoform CRA_a	MYO1C	98934	8	12.41							8	44408.2
A0A024R1U4_HUMAN	RAB5C, member RAS oncogene family, isoform CRA_a	RAB5C	23483	3	17.59																	3	41965.1
A0A024RBH2_HUMAN	Cytoskeleton-associated protein 4, isoform CRA_c	CKAP4	66022	5	11.13											5	41911.3
ATPA_HUMAN	ATP synthase subunit alpha, mitochondrial	ATP5F1A	59751	3	7.96															3	39197.9
A0A024R1X8_HUMAN	Junction plakoglobin	JUP	81727	4	4.97									3	25555.1	2	12496.7
B4DHR1_HUMAN	cDNA FLJ53009, highly similar to Calreticulin		24287	2	18.87															2	37591.4
A0A384P5G6_HUMAN	75 kDa glucose-regulated protein		73680	5	9.43											5	37315.3
A0A0X9TDD0_HUMAN	GCT-A1 light chain variable region (Fragment)		12436	1	7.96																	1	36448.9
B7Z1Y6_HUMAN	Contactin-associated protein-like 2	CNTNAP2	42973	1	2.82			1	35800.2
A0A024R3E3_HUMAN	Apolipoprotein A-I, isoform CRA_a	APOA1	30778	3	12.73	2	6108.16									1	2649.41	1	11630.5	1	2408.39	2	12185.6
FBLN1_HUMAN	Fibulin-1	FBLN1	77214	3	4.55									2	18137.8	2	14332.3
B3KML9_HUMAN	Delta-tubulin		44602	12	25.94															1	32148.8
PGRC1_HUMAN	Membrane-associated progesterone receptor component 1	PGRMC1	21671	3	19.49																	3	30408.7
A0A024QZD1_HUMAN	Ribosomal protein L18, isoform CRA_c	RPL18	21634	2	13.83																	2	29410
H7C3T4_HUMAN	Peroxiredoxin-4 (Fragment)	PRDX4	18325	1	6.83																	1	28923
A0A024R462_HUMAN	Fibronectin	FN1	259211	8	4.93	5	12685.3	4	10186.5	1	3411.1
GT251_HUMAN	Procollagen galactosyltransferase 1	COLGALT1	71636	2	2.89									2	20352	1	5386.06
A0A024RB99_HUMAN	Serine hydroxymethyltransferase	SHMT2	53455	1	2.28															1	25405
CAVN3_HUMAN	Caveolae-associated protein 3	CAVIN3	27701	1	3.83																	1	22525.5
B1ALW7_HUMAN	Component of oligomeric Golgi complex 2	COG2	83208	1	0.95							1	20875.3
E9PKE3_HUMAN	Heat shock cognate 71 kDa protein	HSPA8	68806	12	15.79											3	20728.7
B2R5M9_HUMAN	Procollagen-lysine 5-dioxygenase		83504	3	4.95									3	20408.5
A0A024R5Z8_HUMAN	RAB11A, member RAS oncogene family, isoform CRA_a	RAB11A	24394	2	10.19																	2	20017.8
Q8TBM3_HUMAN	V-type proton ATPase subunit a	ATP6V0A2	43176	1	2.42			1	18874.4
H0YAZ7_HUMAN	Sperm-tail PG-rich repeat-containing protein 2 (Fragment)	STPG2	20648	1	3.76																	1	18742.2
A0A024R5Z9_HUMAN	Pyruvate kinase	PKM2	58062	2	4.14													2	18649.4
A0A384P5S0_HUMAN	Epididymis secretory sperm binding protein		49398	1	3.03															1	17451.4
E9PK85_HUMAN	Ras-related protein R-Ras2 (Fragment)	RRAS2	19569	1	7.23																	1	16675.7
Q5JR94_HUMAN	40S ribosomal protein S8	RPS8	24205	1	7.21																	1	16323.2
A0A0S2Z580_HUMAN	Ethylmalonic encephalopathy 1 isoform 2 (Fragment)	ETHE1	26644	1	5.76																	1	15968.6
A0A024R4N0_HUMAN	HCG1640809, isoform CRA_b	hCG_1640809	35274	1	3.11																	1	15753.3
A0A087WUZ3_HUMAN	Spectrin beta chain	SPTBN1	274829	7	2.75	7	14923.3	1	550.171
A0A024R972_HUMAN	Laminin, gamma 1 (Formerly LAMB2), isoform CRA_a	LAMC1	174012	4	3.43			1	1886.81	3	13118.1
P4HA2_HUMAN	Prolyl 4-hydroxylase subunit alpha-2	P4HA2	60902	2	3.93													2	14950.8
ACBD5_HUMAN	Acyl-CoA-binding domain-containing protein 5	ACBD5	60092	1	1.87													1	14086.1
A0A024QZF2_HUMAN	Related RAS viral (R-ras) oncogene homolog, isoform CRA_a	RRAS	23480	2	14.68																	2	12985.2
COIA1_HUMAN	Collagen alpha-1(XVIII) chain	COL18A1	178188	3	2.11	2	6777.8							1	5665.21
B3KM36_HUMAN	cDNA FLJ10153 fis, clone HEMBA1003417, highly similar to BAG family molecular chaperone regulator 2		23712	1	5.21																	1	11668.2
A0A2R8Y5Y7_HUMAN	60S ribosomal protein L9	RPL9	25057	1	4.55																	1	11600.6
A0A024RCW3_HUMAN	Ribosomal protein	RPL10A	15108	1	9.77																	1	11459.2
A0A0N9HU02_HUMAN	PTCHD1 isoform		62468	1	1.29											1	10407.2
LAMB2_HUMAN	Laminin subunit beta-2	LAMB2	195981	3	2.06					3	10147.2
A0A024R5K8_HUMAN	Collagen-binding protein	SERPINH1	46441	1	3.59															1	9878.64
B7Z5H9_HUMAN	Acid beta-galactosidase		60552	2	5.49													1	9396.65
M0QYS1_HUMAN	60S ribosomal protein L13a (Fragment)	RPL13A	24215	3	13.33																	2	9289.54
M0QYD2_HUMAN	Anoctamin	ANO8	65628	1	1.2			1	9232.55
A6NCT7_HUMAN	Collagen alpha-1(XVI) chain	COL16A1	96793	1	1.97			1	9169.46
A0A0A6YYJ8_HUMAN	Putative RNA-binding protein Luc7-like 2	LUC7L2	54224	1	1.75	1	8966.87
B7ZLY3_HUMAN	LTBP1 protein	LTBP1	148464	1	1.03					1	8785.5
A0A286YF22_HUMAN	D-3-phosphoglycerate dehydrogenase	PHGDH	55939	1	1.52															1	8516.9
B3KQT9_HUMAN	Protein disulfide-isomerase		54102	1	2.29													1	8066.05
A0A024R9B8_HUMAN	Carboxypeptidase Q	PGCP	51888	1	2.33															1	7778.32
A0A2R8Y688_HUMAN	Trifunctional enzyme subunit alpha, mitochondrial	HADHA	39212	1	5.88									1	7745.51
A0A024R592_HUMAN	Glucosidase, alpha neutral AB, isoform CRA_b	GANAB	96189	1	2.01							1	7508.23
A0A090N8Y2_HUMAN	Protein disulfide-isomerase A4	ERP70	72932	1	1.86									1	7469.66
A0A087WU08_HUMAN	Haptoglobin	HP	31408	1	4.27																	1	6996.37
A0A024R889_HUMAN	Spectrin, alpha, non-erythrocytic 1 (Alpha-fodrin), isoform CRA_g	SPTAN1	282250	7	3.18	7	6977.25
A6NLG9_HUMAN	Biglycan		34876	1	3.58							1	6530.97
E5RH53_HUMAN	Regulator of microtubule dynamics protein 1	RMDN1	28634	1	3.23																	1	6218.02
A0A024R1W3_HUMAN	Peptidylprolyl isomerase	FKBP10	64245	1	2.06									1	5877.83
B4DDU6_HUMAN	cDNA FLJ50442, highly similar to T-complex protein 1 subunit epsilon		55421	1	1.99													1	5038.86
PLOD3_HUMAN	Multifunctional procollagen lysine hydroxylase and glycosyltransferase LH3	PLOD3	84785	2	3.93									2	4847.04
F8VU56_HUMAN	Protein-tyrosine-phosphatase	PTPRB	239565	1	0.75									1	4815.45
A0A0S2Z4T5_HUMAN	Ras and Rab interactor 1 isoform 2 (Fragment)	RIN1	77500	1	2.5			1	4572.89
A0A0S2Z430_HUMAN	Phosphoenolpyruvate carboxykinase (GTP) (Fragment)	PCK2	70730	1	1.88											1	4466.86
A6PVH9_HUMAN	Copine-1	CPNE1	53047	1	1.87													1	4293.34
A0A0G2JIW1_HUMAN	Heat shock 70 kDa protein 1B	HSPA1B	70109	4	8.72											1	3555.35
A0A0A0MQS9_HUMAN	Laminin subunit alpha-4	LAMA4	202568	2	1.7			2	3449.67
B4DZY7_HUMAN	cDNA FLJ57022, highly similar to Growth-arrest-specific protein 6		59590	1	2.21											1	3350.17
A0A2R8Y5S7_HUMAN	Radixin	RDX	69336	1	1.53									1	2675.21
A0A024QZV0_HUMAN	Epididymis secretory sperm binding protein	hCG_1811539	36178	1	2.78															1	2625.42
A0A024RB09_HUMAN	RAB5B, member RAS oncogene family, isoform CRA_a	RAB5B	23707	2	11.16																	1	2308.32
A0A024RAB6_HUMAN	Heparan sulfate proteoglycan 2 (Perlecan), isoform CRA_b	HSPG2	464017	3	0.87	2	2145.84
ADAM8_HUMAN	Disintegrin and metalloproteinase domain-containing protein 8	ADAM8	88771	1	1.33							1	2068.93
A0A024RB03_HUMAN	KIAA0528, isoform CRA_b	KIAA0528	121458	1	1.45			1	2023.42
B3KNN7_HUMAN	cDNA FLJ30049 fis, clone ADRGL1000033, highly similar to 26S proteasome non-ATPase regulatory subunit 3		57232	1	3.01													1	1806.73
B2RMS9_HUMAN	Inter-alpha (Globulin) inhibitor H4 (Plasma Kallikrein-sensitive glycoprotein)	ITIH4	103362	1	1.29									1	476.457					1	518.645	1	565.908
MXRA5_HUMAN	Matrix-remodeling-associated protein 5	MXRA5	312150	1	0.28	1	1528.19
B2R8I2_HUMAN	cDNA, FLJ93914, highly similar to Homo sapiens histidine-rich glycoprotein (HRG), mRNA		59512	1	1.71	1	1329.05
A0A090N8P3_HUMAN	Peptidylprolyl isomerase	FKBP9	63057	1	2.98											1	1172.6
A0A024R5Z7_HUMAN	Annexin	ANXA2	38604	1	4.13									1	1138.33
Q504U6_HUMAN	TPR protein (Fragment)	TPR	79972	1	1.45			1	863.775
A8K5N5_HUMAN	cDNA FLJ78142, highly similar to Homo sapiens transglutaminase 1 (K polypeptide epidermal type I, protein-glutamine-gamma-glutamyltransferase), mRNA		89773	1	2.33									1	806.142
A0A090N8G0_HUMAN	Diadenosine tetraphosphate synthetase	GARS	77531	1	1.9									1	593.082
HEMO_HUMAN	Hemopexin	HPX	51676	1	3.25																	1	429.016
CO3_HUMAN	Complement C3	C3	187148	1	0.96																	1	76.3374
A0A024R1G6_HUMAN	Apolipoprotein L, 3, isoform CRA_a	APOL3	36545	1	3.32
D3DWL0_HUMAN	Plectin 1, intermediate filament binding protein 500kDa, isoform CRA_b	PLEC1	234119	1	0.38
A0A5C2GJP7_HUMAN	IG c399_light_IGKV2D-29_IGKJ3 (Fragment)		12446	1	12.28
4F2_HUMAN	4F2 cell-surface antigen heavy chain	SLC3A2	67994	1	2.22
A0A024R6I7_HUMAN	Alpha-1-antitrypsin	SERPINA1	46708	1	5.74
A0A087WVW4_HUMAN	Protein-glutamine gamma-glutamyltransferase 5	TGM5	80647	1	2.09
A0A0A0MTH2_HUMAN	Zinc finger protein 133	ZNF133	73837	1	1.5
F8VPD4_HUMAN	Aspartate carbamoyltransferase	CAD	236023	1	0.56
H7BZJ3_HUMAN	Protein disulfide-isomerase A3 (Fragment)	PDIA3	13519	1	11.38
H7C4K7_HUMAN	Uncharacterized protein (Fragment)		12310	1	8.41
K7EPT8_HUMAN	Glial fibrillary acidic protein (Fragment)	GFAP	8376	1	14.67

## Sheet: WDR33-data
accession	protein name	gene name	molecular weight	identified peptides	coverage	WDR33-Band1		WDR33-Band2		WDR33-Band3		WDR33-Band4		WDR33-Band5		WDR33-Band6		WDR33-Band7
						quantified peptides count	iBAQ	quantified peptides count	iBAQ	quantified peptides count	iBAQ	quantified peptides count	iBAQ	quantified peptides count	iBAQ	quantified peptides count	iBAQ	quantified peptides count	iBAQ
TGME49_230010-t26_1-p1	hypothetical protein	TGME49_230010	140376	57	43.94	32	1.00966e+06	30	1.95632e+06	51	1.51203e+07	37	7.84656e+06	21	1.55565e+06	17	475913	8	72902.1
TGME49_247330-t26_1-p1	hypothetical protein	TGME49_247330	204455	102	50.34	67	1.23021e+06	87	1.11594e+07	68	3.39326e+06	35	357676	10	40736.4	12	268066	27	965795
TGME49_224280-t26_1-p1	CPSF A subunit region protein	TGME49_224280	301891	119	41.76	95	4.85418e+06	85	5.36199e+06	72	3.00821e+06	44	881437	33	488158	29	581822	25	321729
TGME49_219440-t26_1-p1	hypothetical protein	TGME49_219440	181402	67	45.87	37	625595	59	1.0536e+07	37	1.37264e+06	43	2.39796e+06	21	257164	14	172947	10	42554.7
TGME49_268250-t26_1-p1	WD domain, G-beta repeat-containing protein	TGME49_268250	59896	14	42.65	1	9808.27	4	126715	4	112040	2	44224.1	3	166552	13	9.91823e+06	2	25788.1
TGME49_283740-t26_1-p1	RNA recognition motif-containing protein	TGME49_283740	64433	20	42.44	2	22384.2	5	160031	5	112086	3	64990.3	18	6.59247e+06	9	1.45744e+06	8	1.26628e+06
TGME49_285200-t26_1-p1	cleavage and polyadenylation specifity factor protein	TGME49_285200	116743	44	40.73	21	381037	21	587612	31	1.31158e+06	30	3.63146e+06	26	1.68998e+06	18	372840	10	453257
TGME49_261960-t26_1-p1	hypothetical protein	TGME49_261960	129369	36	39.24	19	207134	15	384863	34	5.05033e+06	24	1.25202e+06	18	481379	8	93656.6	12	170370
TGME49_294700-t26_1-p1	polynucleotide 5'-hydroxyl-kinase	TGME49_294700	73663	24	40.26	11	133102	4	74867.6	9	140829	10	188440	22	3.18515e+06	4	41562.7	6	75890
TGME49_201200-t26_1-p1	zinc finger (CCCH type) motif-containing protein	TGME49_201200	68065	14	19.06	3	23164.6	2	35843.3			1	34675	13	2.81089e+06	1	25274.9
TGME49_254210-t26_1-p1	RNA recognition motif-containing protein	TGME49_254210	114336	19	28.32	3	11006.4	5	19258.2	12	210170	15	513787	7	113034	4	57741.5	6	594653
TGME49_226080-t26_1-p1	polyA polymerase	TGME49_226080	87169	2	2.71							2	10874.6
TGME49_230230-t26_1-p1	hypothetical protein	TGME49_230230	29857	1	5.36							1	3897.47
TGME49_286420-t26_1-p1	elongation factor 1-alpha (EF-1-ALPHA), putative	TGME49_286420	49006	25	50.67	2	30633.2	2	57109.3	4	153413	5	185870	4	136544	8	456044	24	21472128
TGME49_247550-t26_1-p1	heat shock protein HSP60	TGME49_247550	60914	30	49.04	1	7869.17	2	16940.8	2	14022.2	1	7254.06	10	220675	26	7.54698e+06
TGME49_273760-t26_1-p1	heat shock protein HSP70	TGME49_273760	72880	36	43.47	2	14866.2	4	57379.7	7	130352	7	153851	34	5.69865e+06	1	6792.87
TGME49_211680-t26_1-p1	protein disulfide isomerase	TGME49_211680	52802	22	45.86											2	19413.8	22	4.71263e+06
TGME49_308090-t26_1-p1	rhoptry protein ROP5	TGME49_308090	61102	16	26.96											10	1.70811e+06	14	2.47478e+06
TGME49_311720-t26_1-p1	chaperonin protein BiP	TGME49_311720	73253	26	36.38									24	3.90702e+06
TGME49_288380-t26_1-p1	heat shock protein HSP90	TGME49_288380	81933	38	42.51	1	4958.86			6	59565.5	37	3.25501e+06	1	7434.02
TGME49_240600-t26_1-p1	chaperonin cpn60, putative	TGME49_240600	72237	20	26.84					1	8515.2			19	2.25831e+06	12	1.00693e+06
TGME49_205470-t26_1-p1	translation elongation factor 2 family protein, putative	TGME49_205470	106572	35	34.87	1	7857.24	1	11464.3	5	65928.2	34	2.80449e+06
TGME49_256760-t26_1-p1	pyruvate kinase PyK1	TGME49_256760	57530	23	43.5											20	1631176	14	881019
TGME49_232250-t26_1-p1	catalase	TGME49_232250	57298	18	33.07									1	7386.09	18	2.4009e+06	1	12655.1
TGME49_277270-t26_1-p1	NTPase II	TGME49_277270	37376	9	27.33			1	3949.88	1	3731.87			6	248083	9	2.15009e+06
TGME49_232340-t26_1-p1	protein phosphatase 2C domain-containing protein	TGME49_232340	59868	18	32.6									3	570678	15	1567894
TGME49_290670-t26_1-p1	leucyl aminopeptidase LAP	TGME49_290670	83237	30	37					1	4028.07	1	3005.08	2	4802.65	29	2.09424e+06	5	26865.1
TGME49_249180-t26_1-p1	bifunctional dihydrofolate reductase-thymidylate synthase	TGME49_249180	68752	23	34.75	3	7388.11	1	2812.81	3	13802.6			23	2.02448e+06	3	15388.6
TGME49_309730-t26_1-p1	thioredoxin reductase	TGME49_309730	70781	13	23.11									1	8252.19	11	1.01956e+06	11	893143
TGME49_290950-t26_1-p1	clathrin heavy chain, putative	TGME49_290950	194503	65	40.61	9	25112.3	46	638646	56	1.24285e+06
TGME49_270510-t26_1-p1	asparaginyl-tRNA synthetase (NOB+tRNA synthase)	TGME49_270510	75005	25	31.21							1	6302.03	1	4191.11	21	1.83199e+06
TGME49_283850-t26_1-p1	peptidyl-prolyl cis-trans isomerase	TGME49_283850	55589	17	33.8									3	71963.7	15	1.75317e+06
TGME49_292320-t26_1-p1	hypothetical protein	TGME49_292320	97752	1	0.88											1	1.80597e+06
TGME49_244560-t26_1-p1	heat shock protein 90, putative	TGME49_244560	96823	35	38.13			1	7926.45			34	1.75498e+06
TGME49_287500-t26_1-p1	T complex chaperonin, putative	TGME49_287500	59333	22	41.55											19	1.5997e+06	6	68420.8
TGME49_253430-t26_1-p1	asparagine synthetase, putative	TGME49_253430	65868	16	28.06									1	1206	13	1.48402e+06	6	121304
TGME49_220950-t26_1-p1	hypothetical protein	TGME49_220950	38556	2	6.06													2	1.40075e+06
TGME49_288360-t26_1-p1	tryptophanyl-tRNA synthetase (TrpRS2)	TGME49_288360	77058	22	27.43			1	953.69	1	1026.87	1	812.406	22	1.37891e+06	1	963.346
TGME49_272910-t26_1-p1	T-complex protein 1 delta subunit	TGME49_272910	58644	23	36.16											22	996759	14	366223
TGME49_293180-t26_1-p1	NADP-specific glutamate dehydrogenase	TGME49_293180	63799	19	24.22							1	3635.25			8	158323	17	1.15631e+06
TGME49_233220-t26_1-p1	hypothetical protein	TGME49_233220	159704	35	20.8	3	5397.84	4	16269.9	26	460266			23	553808	15	137105	13	101751
TGME49_226960-t26_1-p1	phosphofructokinase PFKII	TGME49_226960	131362	36	31.27	4	32585	10	104478	31	1.12431e+06	1	338.938
TGME49_229990-t26_1-p1	T-complex protein 1 subunit alpha, putative	TGME49_229990	59216	20	37.59					1	2104.55	1	1867.42			19	1.05188e+06	9	188190
TGME49_205440-t26_1-p1	CCT chaperonin gamma subunit	TGME49_205440	60613	23	44.78											23	1.24195e+06
TGME49_230450-t26_1-p1	bifunctional GMP synthase/glutamine amidotransferase protein	TGME49_230450	62295	15	32.69					1	9840.49			1	564.014	15	1.21104e+06
TGME49_311240-t26_1-p1	DnaJ family chaperone, putative	TGME49_311240	47449	17	28.64													17	1.16306e+06
TGME49_251690-t26_1-p1	seryl-tRNA synthetase, cytoplasmic, putative	TGME49_251690	54117	16	33.4											3	56779.6	16	1.07878e+06
TGME49_239820-t26_1-p1	D-3-phosphoglycerate dehydrogenase	TGME49_239820	65194	17	28.15							1	1494.6	15	585840	6	500484	1	6859.16
TGME49_217460-t26_1-p1	glutaminyl-tRNA synthetase (GlnRS)	TGME49_217460	95527	23	29.88							23	988063	3	20979.8
TGME49_297500-t26_1-p1	T-complex protein 1 eta subunit	TGME49_297500	59475	15	33.33									1	1299.91	15	752477	8	231106
TGME49_273090-t26_1-p1	cell division protein CDC48CY	TGME49_273090	89397	28	33.42					1	4265.32	26	977047
TGME49_243710-t26_1-p1	t-complex protein beta subunit	TGME49_243710	61473	25	45.6											24	935667
TGME49_277240-t26_1-p1	NTPase I	TGME49_277240	22641	6	35.47									1	83112	3	736567
TGME49_266640-t26_1-p1	Acetyl-coenzyme A synthetase 2, putative	TGME49_266640	79991	20	30.39	2	4177.77			4	31289.3	5	43374	19	724019
TGME49_286750-t26_1-p1	MA3 domain-containing protein	TGME49_286750	58969	17	34.56											1	9386.78	16	777429
TGME49_232440-t26_1-p1	Brf1p family coiled coil protein	TGME49_232440	54044	11	26.71											11	558836	7	206830
TGME49_226250-t26_1-p1	DEAD (Asp-Glu-Ala-Asp) box polypeptide DDX3X	TGME49_226250	78593	24	30.93							4	39654.8	15	232582	17	370440	7	83392.8
TGME49_273520-t26_1-p1	PCI domain-containing protein	TGME49_273520	67341	19	36.27			1	1176.34	1	1173.54	1	999.964	4	29408.6	17	679745
TGME49_221470-t26_1-p1	hypothetical protein	TGME49_221470	61517	14	22.46											14	709545
TGME49_273460-t26_1-p1	eukaryotic translation initiation factor 3 subunit 6 interacting protein	TGME49_273460	75074	16	31.61									16	700910	1	4376.46
TGME49_312630-t26_1-p1	anonymous antigen-1, putative	TGME49_312630	286218	60	26.75	27	123479	50	561853
TGME49_289650-t26_1-p1	PEP-carboxykinase I	TGME49_289650	75343	17	27.47									2	6061.55	16	640864
TGME49_236650-t26_1-p1	DEAD (Asp-Glu-Ala-Asp) box polypeptide 17	TGME49_236650	59968	17	32.91											13	345073	14	300821
TGME49_203050-t26_1-p1	AP2 domain transcription factor AP2VIIa-6	TGME49_203050	257421	1	0.29			1	637435
TGME49_204050-t26_1-p1	subtilisin SUB1	TGME49_204050	81777	10	17.48									10	570899	4	64398.9
TGME49_234505-t26_1-p1	phenylalanyl-tRNA synthetase alpha chain A, putative	TGME49_234505	59323	13	25.9											5	60530.9	13	573435
TGME49_208030-t26_1-p1	microneme protein MIC4	TGME49_208030	63021	6	12.41									4	174732	5	436420
TGME49_278830-t26_1-p1	glucose-6-phosphate 1-dehydrogenase	TGME49_278830	98280	21	29.27	1	435.567			1	1509.54	21	606074
TGME49_299210-t26_1-p1	CTP synthase	TGME49_299210	70998	19	27.61									19	590496
TGME49_294200-t26_1-p1	glucose-6-phosphate 1-dehydrogenase	TGME49_294200	62736	14	26.61													13	572140
TGME49_201780-t26_1-p1	microneme protein MIC2	TGME49_201780	82634	7	13.26							7	539354	1	11570.1
TGME49_266960-t26_1-p1	beta tubulin	TGME49_266960	50073	14	30.73											1	13938.3	13	527725
TGME49_202370-t26_1-p1	T-complex protein 1, epsilon subunit (TCP-1-epsilon), putative	TGME49_202370	58618	12	26.68											12	518031	1	9742.38
TGME49_317720-t26_1-p1	eukaryotic translation initiation factor 3 subunit 7, putative	TGME49_317720	68767	14	26.93									13	511939
TGME49_301440-t26_1-p1	calcium-dependent protein kinase CDPK1	TGME49_301440	65421	6	9.28											2	31512.5	6	467255
TGME49_280380-t26_1-p1	poly(ADP-ribose) glycohydrolase	TGME49_280380	61837	13	25.14													11	481366
TGME49_266460-t26_1-p1	small ubiquitin family modifier, putative	TGME49_266460	10319	1	7.69					1	478214
TGME49_300260-t26_1-p1	threonyl-tRNA synthetase family protein	TGME49_300260	95898	21	30.81							19	463440
TGME49_318410-t26_1-p1	TCP-1 chaperonin, putative	TGME49_318410	58666	8	18.06											8	443743
TGME49_208530-t26_1-p1	nicotinate phosphoribosyltransferase	TGME49_208530	65580	11	25.47											11	441821
TGME49_235930-t26_1-p1	domain K- type RNA binding proteins family protein	TGME49_235930	64265	11	17.89									11	416863	2	22663.4
TGME49_263870-t26_1-p1	glutamate-tRNA ligase	TGME49_263870	95128	14	18.14							14	428452
TGME49_285980-t26_1-p1	glucosephosphate-mutase GPM1	TGME49_285980	70587	11	21.35									11	418280
TGME49_219310-t26_1-p1	DnaK family protein	TGME49_219310	90143	13	17.36							12	417449
TGME49_321620-t26_1-p1	dynamin-related protein DRPB	TGME49_321620	95931	20	25.47							18	363317	4	43997.4	1	4698.52
TGME49_236540-t26_1-p1	RNA recognition motif-containing protein	TGME49_236540	53439	7	17.15													7	401979
TGME49_248810-t26_1-p1	nuclear factor NF7	TGME49_248810	54283	9	19.92													8	397011
TGME49_223140-t26_1-p1	tRNA binding domain-containing protein	TGME49_223140	50986	11	22.67													10	388066
TGME49_290660-t26_1-p1	RNA recognition motif-containing protein	TGME49_290660	48395	3	8.97													3	382240
TGME49_316400-t26_1-p1	alpha tubulin TUBA1	TGME49_316400	50114	6	17.88											1	19523.9	6	356250
TGME49_273490-t26_1-p1	glutamine synthetase, type I, putative	TGME49_273490	65147	10	22.8													10	369874
TGME49_258870-t26_1-p1	hypothetical protein	TGME49_258870	101597	15	20.31							14	186249	1	4714.92	3	152440	3	22477.5
TGME49_306960-t26_1-p1	phenylalanine--tRNA ligase, beta subunit protein	TGME49_306960	74585	10	18.81									10	356744
TGME49_312200-t26_1-p1	serine/threonine protein phosphatase	TGME49_312200	61537	13	27.37											13	339135	1	10986.7
TGME49_231630-t26_1-p1	alveolin domain containing intermediate filament IMC4	TGME49_231630	50172	6	19.03											5	318442	3	27556.4
TGME49_319530-t26_1-p1	splicing factor SF2	TGME49_319530	53354	3	7.13											3	345685
TGME49_291960-t26_1-p1	rhoptry kinase family protein ROP40 (incomplete catalytic triad)	TGME49_291960	57948	6	10.1													6	343444
TGME49_251500-t26_1-p1	eukaryotic initiation factor-3, subunit 3, putative	TGME49_251500	65714	9	15.67													9	340106
TGME49_202530-t26_1-p1	aspartate-tRNA ligase	TGME49_202530	86802	17	19.28									1	3092.55	17	336791
TGME49_291680-t26_1-p1	Sec23/Sec24 trunk domain-containing protein	TGME49_291680	87610	15	26.42							15	338630
TGME49_256970-t26_1-p1	vacuolar ATP synthase subunit A, putative	TGME49_256970	68122	12	21.75									3	61541.8	11	268416
TGME49_291890-t26_1-p1	microneme protein MIC1	TGME49_291890	48629	5	12.5													5	324333
TGME49_205510-t26_1-p1	nucleolar protein 5, putative	TGME49_205510	54349	11	28.78													10	322313
TGME49_267080-t26_1-p1	26S protease regulatory subunit 4, putative	TGME49_267080	49121	9	24.04													8	316938
TGME49_277000-t26_1-p1	transport protein Sec24, putative	TGME49_277000	108035	8	9.52							7	306038			1	10338.6
TGME49_215260-t26_1-p1	carbamoylphosphate synthetase	TGME49_215260	187038	33	22.6	2	1545.44	20	131900	22	181271	1	709.353					1	259.929
TGME49_235470-t26_1-p1	myosin A	TGME49_235470	93320	19	25.03							18	313094
TGME49_310670-t26_1-p1	glycogen phosphorylase 1, putative	TGME49_310670	105537	18	22.23			1	792.574	1	1053.84	18	309904
TGME49_218780-t26_1-p1	phosphoserine aminotransferase, putative	TGME49_218780	52755	6	17.67													6	309430
TGME49_288860-t26_1-p1	RuvB family 2 protein	TGME49_288860	55446	14	29.53													14	300648
TGME49_270240-t26_1-p1	MAG1	TGME49_270240	49180	6	14.16											6	215418	1	79738
TGME49_214490-t26_1-p1	peptidase M16 inactive domain-containing protein	TGME49_214490	148868	19	17.22			1	2767.57	19	284613	2	5769.03
TGME49_220860-t26_1-p1	DEAD/DEAH box helicase	TGME49_220860	65158	11	21.43									11	247171	4	44900.5
TGME49_233110-t26_1-p1	IMP dehydrogenas	TGME49_233110	59104	6	12.52											6	291918
TGME49_259550-t26_1-p1	dihydropteroate synthase	TGME49_259550	82685	9	14.3			3	20121	3	21967.6	2	2056.59	7	204774	3	40300.7
TGME49_275650-t26_1-p1	hypothetical protein	TGME49_275650	101159	20	28.51					1	1376.47	18	285718
TGME49_264610-t26_1-p1	RNA recognition motif-containing protein	TGME49_264610	44974	7	18.37											1	3391.18	6	283161
TGME49_219800-t26_1-p1	vacuolar ATP synthase subunit b, putative	TGME49_219800	56614	11	24.16											2	13586.6	8	268915
TGME49_265450-t26_1-p1	hexokinase	TGME49_265450	51498	8	23.29			1	572.15					1	843.831	1	2243.92	8	278778
TGME49_311090-t26_1-p1	ubiquitin carboxyl-terminal hydrolase	TGME49_311090	67167	11	16.64									10	282427
TGME49_222860-t26_1-p1	eukaryotic translation initiation factor, putative	TGME49_222860	88392	8	11.11					1	1685.24	6	279169
TGME49_311310-t26_1-p1	protein phosphatase 2B catalytic subunit, calcineurin family phosphatse superfamily protein	TGME49_311310	56446	8	17.17													8	275919
TGME49_252290-t26_1-p1	importin alpha, putative	TGME49_252290	59360	2	3.85											2	246324	1	23520.4
TGME49_247470-t26_1-p1	nucleolar protein, putative	TGME49_247470	59940	9	22.01									3	32588.2	9	237117
TGME49_307850-t26_1-p1	6-phosphogluconate dehydrogenase	TGME49_307850	54701	8	14.46													8	269125
TGME49_292220-t26_1-p1	PCI domain-containing protein	TGME49_292220	61440	13	24.91											12	248725	1	1779.32
TGME49_318310-t26_1-p1	transketolase	TGME49_318310	76907	10	16.31									9	238290
TGME49_216260-t26_1-p1	eukaryotic initiation factor-2B, gamma subunit, putative	TGME49_216260	58016	8	19.05											8	212912	3	22703.2
TGME49_212300-t26_1-p1	hypothetical protein	TGME49_212300	75643	12	21.23									12	229933
TGME49_203390-t26_1-p1	CRAL/TRIO domain-containing protein	TGME49_203390	50481	6	14.25											4	140055	5	84394.1
TGME49_244110-t26_1-p1	nucleosome assembly protein (nap) protein	TGME49_244110	48587	7	21.94													7	222775
TGME49_205710-t26_1-p1	lysine-tRNA ligase	TGME49_205710	74395	16	24.16									16	219938
TGME49_294898-t26_1-p1	tetratricopeptide repeat-containing protein	TGME49_294898	88633	13	17.9							13	215843
TGME49_307810-t26_1-p1	hypothetical protein	TGME49_307810	44172	3	9.93													3	210458
TGME49_277500-t26_1-p1	26S proteasome regulatory subunit 7, putative	TGME49_277500	52368	8	17.02											1	1093.09	8	203077
TGME49_283780-t26_1-p1	glucose-6-phosphate isomerase GPI	TGME49_283780	74385	10	13.62											10	202932
TGME49_277760-t26_1-p1	adenylosuccinate lyase, putative	TGME49_277760	74234	13	21.79									12	202693
TGME49_297970-t26_1-p1	aspartyl aminopeptidase	TGME49_297970	55897	6	15.16													6	200832
TGME49_251780-t26_1-p1	heat shock protein	TGME49_251780	78251	11	17.58									11	199251
TGME49_291930-t26_1-p1	RNA recognition motif-containing protein	TGME49_291930	73118	9	13.9							9	193330
TGME49_313010-t26_1-p1	DEAD (Asp-Glu-Ala-Asp) box polypeptide DDX6	TGME49_313010	53434	10	22.74													10	191015
TGME49_209160-t26_1-p1	myristoyl CoA:protein N-myristoyltransferase	TGME49_209160	52377	9	19.44													9	183819
TGME49_201700-t26_1-p1	WD domain, G-beta repeat-containing protein	TGME49_201700	67437	5	10.86									4	148714	2	33986
TGME49_223920-t26_1-p1	rhoptry neck protein RON3	TGME49_223920	222883	25	13.43			23	180741
TGME49_210840-t26_1-p1	arginyl-tRNA synthetase family protein	TGME49_210840	67019	9	18.66									9	177797
TGME49_215220-t26_1-p1	hypothetical protein	TGME49_215220	68630	5	17.49									4	129909	1	4343.94	3	42994.9
TGME49_310080-t26_1-p1	AMP-binding enzyme domain-containing protein	TGME49_310080	87848	12	16.86							12	174766
TGME49_271440-t26_1-p1	NPL4 family protein	TGME49_271440	55803	6	13.15											6	162514	2	12145.9
TGME49_261210-t26_1-p1	26s proteasome subunit p55, putative	TGME49_261210	55050	12	20.21													11	170811
TGME49_247760-t26_1-p1	AMP-binding enzyme domain-containing protein	TGME49_247760	86987	12	17.78							12	168072
TGME49_210980-t26_1-p1	alternative splicing type 3 and, putative	TGME49_210980	64529	7	12.09									7	163289
TGME49_225050-t26_1-p1	adenosylhomocysteinase, putative	TGME49_225050	64106	8	13.27													8	159146
TGME49_227960-t26_1-p1	PCI domain-containing protein	TGME49_227960	55708	9	14.62													8	159080
TGME49_283698-t26_1-p1	hypothetical protein	TGME49_283698	37697	1	2.01									1	158742
TGME49_258740-t26_1-p1	eukaryotic initiation factor-2A, putative	TGME49_258740	64654	9	18.69									2	6634.4	7	141529	3	10458.3
TGME49_235160-t26_1-p1	hypothetical protein	TGME49_235160	168307	11	7.95					10	151997
TGME49_294350-t26_1-p1	DEAD/DEAH box helicase domain-containing protein	TGME49_294350	273734	31	14.75	14	28703.2	23	121273
TGME49_274190-t26_1-p1	eukaryotic initiation factor 2B epsilon subunit, putative	TGME49_274190	88812	11	14.59							10	147999
TGME49_232130-t26_1-p1	hypothetical protein	TGME49_232130	47866	4	13.23													4	143540
TGME49_295110-t26_1-p1	rhoptry protein ROP7	TGME49_295110	63395	6	10.09													5	142982
TGME49_278870-t26_1-p1	myosin F	TGME49_278870	216398	19	12.08	1	592.474	14	72156.8	12	69277.7			1	648.442
TGME49_257490-t26_1-p1	prefoldin subunit superfamily protein	TGME49_257490	33032	1	2.34					1	136479
TGME49_223390-t26_1-p1	activating signal cointegrator 1 complex subunit 3 family 1 ASCC3L1, putative	TGME49_223390	248403	29	15.13			27	130302
TGME49_320570-t26_1-p1	elongation factor Tu, putative	TGME49_320570	63550	6	14.68									5	97855.9	2	32017.6
TGME49_312990-t26_1-p1	DEAD/DEAH box ATP-dependent RNA helicase	TGME49_312990	63847	6	13.36									3	25848	5	102989
TGME49_240890-t26_1-p1	6-phosphofructokinase	TGME49_240890	154691	13	10.94					13	128707
TGME49_216670-t26_1-p1	FUSE-binding protein 2 / KH-type splicing regulatory protein	TGME49_216670	100094	14	18.07							12	124270					2	3521.54
TGME49_206590-t26_1-p1	calcium-dependent protein kinase CDPK2A	TGME49_206590	86378	8	12.98									5	54713.6	6	67292.5	2	3942.51
TGME49_215740-t26_1-p1	notchless, putative	TGME49_215740	57710	8	18.03													8	122668
TGME49_207770-t26_1-p1	PCI domain-containing protein	TGME49_207770	55463	6	14.48													5	119626
TGME49_229180-t26_1-p1	HEAT repeat-containing protein	TGME49_229180	136164	13	13.09					13	119051
TGME49_233520-t26_1-p1	ATP-dependent RNA helicase	TGME49_233520	88865	9	13.23							8	118299
TGME49_314100-t26_1-p1	tetratricopeptide repeat-containing protein	TGME49_314100	64293	6	13.62									6	113363
TGME49_207620-t26_1-p1	pyridine nucleotide-disulfide oxidoreductase domain-containing protein	TGME49_207620	71159	4	7.08											4	112898
TGME49_265530-t26_1-p1	RNA recognition motif-containing protein	TGME49_265530	51488	4	9.96											2	33529.4	3	76881.6
TGME49_265520-t26_1-p1	hypothetical protein	TGME49_265520	56677	7	17.38											7	108513
TGME49_268850-t26_1-p1	enolase 2	TGME49_268850	52114	3	9.26									1	7452.7			3	100425
TGME49_289310-t26_1-p1	cullin family protein	TGME49_289310	103665	3	3.28							3	106443
TGME49_280370-t26_1-p1	hypothetical protein	TGME49_280370	71866	7	14.14							5	46818.5	2	9550.62	6	38819.3	2	10830.3
TGME49_295320-t26_1-p1	embryo sac development arrest EDA7, putative	TGME49_295320	69302	7	11.48									7	102906			2	2659.95
TGME49_221410-t26_1-p1	actin-like protein ALP4	TGME49_221410	52155	1	1.9													1	105484
TGME49_318710-t26_1-p1	ATP-binding cassette sub-family F member 1	TGME49_318710	89166	5	8.51							5	103064
TGME49_243800-t26_1-p1	long-chain fatty acid CoA ligase, putative	TGME49_243800	83508	6	9.89							6	97834.9
TGME49_292080-t26_1-p1	leucyl-tRNA synthetase	TGME49_292080	141139	14	14.93			2	5591.06	13	92172.6
TGME49_288500-t26_1-p1	FAD Malate-dehydrogenase (MDH-FAD)	TGME49_288500	60381	6	10.73													6	97502.4
TGME49_235970-t26_1-p1	eukaryotic initiation factor-2 gamma, putative	TGME49_235970	50509	3	9.46													2	95966.4
TGME49_228170-t26_1-p1	inner membrane complex protein IMC2A	TGME49_228170	170816	16	10.6					15	95477
TGME49_290850-t26_1-p1	WD-40 repeat protein	TGME49_290850	58309	7	14.4													6	95394.3
TGME49_221950-t26_1-p1	splicesome-associated protein, putative	TGME49_221950	64912	6	11.65									6	94511.4
TGME49_294010-t26_1-p1	yrdC domain-containing protein	TGME49_294010	86987	6	9.54							5	89846
TGME49_258070-t26_1-p1	hypothetical protein	TGME49_258070	75742	10	18.14									9	89321.7
TGME49_300140-t26_1-p1	elongation factor 1-gamma, putative	TGME49_300140	44040	1	2.28					1	21772	1	41579.7					1	24095.3
TGME49_219820-t26_1-p1	polyubiquitin UbC, putative	TGME49_219820	68581	3	49.75			3	44886	2	17621.5	1	15527.3	1	7727.89
TGME49_264000-t26_1-p1	aldehyde dehydrogenase	TGME49_264000	68990	7	9.94									7	85202.3
TGME49_305340-t26_1-p1	corepressor complex CRC230	TGME49_305340	207303	16	9.97			14	63520.9	7	19871.7
TGME49_319850-t26_1-p1	splicing factor U2AF family SnRNP auxilary factor large subunit, RRM domain-containing protein	TGME49_319850	51681	4	8.08													4	82894.1
TGME49_240870-t26_1-p1	beta adaptin protein, putative	TGME49_240870	101992	9	13.1							9	80098.1
TGME49_232660-t26_1-p1	Hsp70 interacting protein HIP	TGME49_232660	45143	4	14.59													3	78842.9
TGME49_249990-t26_1-p1	hypothetical protein	TGME49_249990	92586	7	10.98							7	78834.5
TGME49_263190-t26_1-p1	adenylosuccinate lyase, putative	TGME49_263190	55136	4	7.6													4	78534.5
TGME49_216000-t26_1-p1	alveolin domain containing intermediate filament IMC3	TGME49_216000	58000	2	4.83									2	62963	1	15471.2
TGME49_318440-t26_1-p1	helicase associated domain (ha2) protein	TGME49_318440	236962	23	13.03			20	63155	6	12670	1	1604.44
TGME49_240060-t26_1-p1	hypothetical protein	TGME49_240060	88533	4	8.3							4	72936.8	1	1561.95	1	2691.53
TGME49_312530-t26_1-p1	splicing factor, CC1 family protein	TGME49_312530	69366	4	5.69									4	76401
TGME49_224850-t26_1-p1	polyadenylate binding protein, putative	TGME49_224850	82573	4	6.64							4	59421.3	2	13555.5			1	3327.85
TGME49_221620-t26_1-p1	beta-tubulin, putative	TGME49_221620	50037	14	26.5													5	75406.4
TGME49_310010-t26_1-p1	rhoptry neck protein RON1	TGME49_310010	127433	5	6.39									2	5655.85	5	68953.1
TGME49_262050-t26_1-p1	rhoptry kinase family protein ROP39	TGME49_262050	65132	3	5.78													2	73912.4
TGME49_269950-t26_1-p1	hypothetical protein	TGME49_269950	104680	9	11.76							8	70495.5					1	1138.89
TGME49_312618-t26_1-p1	hypothetical protein	TGME49_312618	59251	5	10.63											5	70956.4
TGME49_269800-t26_1-p1	glutamine-dependent NAD(+) synthetase protein, putative	TGME49_269800	94398	4	5.22							4	69979.4
TGME49_270550-t26_1-p1	gamma-glutamyl phosphate reductase, putative	TGME49_270550	54410	3	7.37													3	69186.2
TGME49_216790-t26_1-p1	ATP-binding cassette sub-family E member 1, putative	TGME49_216790	69219	4	8.16											4	68845.3
TGME49_205580-t26_1-p1	nuclear factor NF4	TGME49_205580	51221	3	9.26											3	68038.1
TGME49_228400-t26_1-p1	WD domain, G-beta repeat-containing protein	TGME49_228400	69954	5	8.23									4	48459	2	19233.5
TGME49_231970-t26_1-p1	pre-mRNA processing splicing factor PRP8	TGME49_231970	291848	28	11.15	16	21520.3	15	45613.1
TGME49_293690-t26_1-p1	profilin PRF	TGME49_293690	17741	2	15.15	1	6804.37					1	11256.1	1	47238.2
TGME49_251620-t26_1-p1	flap structure-specific endonuclease 1, putative	TGME49_251620	60296	3	6.34									3	65179.3
TGME49_219590-t26_1-p1	RuvB family 1 protein	TGME49_219590	52950	3	8.54													3	64173.8
TGME49_270320-t26_1-p1	protein phosphatase 2C domain-containing protein	TGME49_270320	58674	4	10.97											4	63921.1
TGME49_247220-t26_1-p1	nudix -type motif 9 isoform a family protein	TGME49_247220	60639	3	8.42													3	63651.6
TGME49_309600-t26_1-p1	hypothetical protein	TGME49_309600	106522	4	4.9							4	44269.9	3	18962.6
TGME49_217600-t26_1-p1	calcium-dependent protein kinase CDPK9	TGME49_217600	75601	6	7.66									6	62656.3
TGME49_246330-t26_1-p1	CRAL/TRIO domain-containing protein	TGME49_246330	48774	4	9.93													4	60640.1
TGME49_255260-t26_1-p1	apical membrane antigen AMA1	TGME49_255260	63021	3	6.15											3	60143.3
TGME49_295040-t26_1-p1	HEAT repeat-containing protein	TGME49_295040	104595	5	6.08							5	57673
TGME49_220240-t26_1-p1	hypothetical protein	TGME49_220240	54103	3	9.7									1	148.313	3	56038.6
TGME49_211690-t26_1-p1	AAA family protein	TGME49_211690	167149	15	11.77					15	52834.4	2	2105.64
TGME49_309140-t26_1-p1	transducin beta-like protein TBL1	TGME49_309140	84699	6	9.45							5	54923.1
TGME49_234190-t26_1-p1	serine hydroxymethyltransferase 2, putative	TGME49_234190	65114	4	9.08													4	54911.4
TGME49_291040-t26_1-p1	lactate dehydrogenase LDH2	TGME49_291040	35334	1	2.15													1	54553.4
TGME49_239620-t26_1-p1	5'-nucleotidase, C-terminal domain-containing protein	TGME49_239620	95852	5	5.77							5	53984.2
TGME49_219850-t26_1-p1	prolyl-tRNA synthetase (ProRS)	TGME49_219850	93479	7	11.81					1	2620.69	6	50322.5
TGME49_268950-t26_1-p1	hypothetical protein	TGME49_268950	60197	5	12.89									5	51347
TGME49_273870-t26_1-p1	SWI2/SNF2 ISWI-like (AT hook)	TGME49_273870	175264	9	7.07			9	49812.1			2	1170.31
TGME49_247300-t26_1-p1	hypothetical protein	TGME49_247300	95512	7	9.41							4	29168.4	2	18761.3			1	2963.41
TGME49_223960-t26_1-p1	ubiquitin interaction motif family protein	TGME49_223960	41377	3	9.54													3	50385.4
TGME49_271350-t26_1-p1	bifunctional protein FolC subfamily protein	TGME49_271350	61449	4	12.12											4	49779.4
TGME49_235490-t26_1-p1	hypothetical protein	TGME49_235490	102119	6	9.53							5	38919.8	3	10829.8
TGME49_319920-t26_1-p1	2-oxo acid dehydrogenases acyltransferase (catalytic domain) domain-containing protein	TGME49_319920	70290	3	6.28													3	48363.3
TGME49_289540-t26_1-p1	hypothetical protein	TGME49_289540	100517	5	5.76							5	47276.9
TGME49_231480-t26_1-p1	GCN1, putative	TGME49_231480	362621	33	13.2	32	42062	5	4973.53
TGME49_215785-t26_1-p1	rhoptry protein ROP2A	TGME49_215785	49155	2	6.47													2	46721
TGME49_269690-t26_1-p1	hypothetical protein	TGME49_269690	94304	7	8.55							3	18265.1	3	28238.5
TGME49_294360-t26_1-p1	ubiquitin specific protease 39 isoform 2, putative	TGME49_294360	64190	7	17.69									4	26120.8	4	20261.7
TGME49_207450-t26_1-p1	DNA segment, Chr 10, Wayne State University 52, expressed family protein	TGME49_207450	56365	2	3.85													2	46207
TGME49_248890-t26_1-p1	actin-like protein ALP3b	TGME49_248890	60828	3	5.64									3	46185.3
TGME49_209030-t26_1-p1	actin ACT1	TGME49_209030	41908	2	7.71			1	6914.27	1	7798.18	1	8108.47	2	11889.4			2	10720.2
TGME49_291950-t26_1-p1	RNA recognition motif-containing protein	TGME49_291950	73853	3	5.79							3	31306.4	1	14096
TGME49_221522-t26_1-p1	adaptor complexes medium subunit family protein	TGME49_221522	61127	2	3.15											2	45390.5
TGME49_226730-t26_1-p1	aconitate hydratase ACN/IRP	TGME49_226730	114885	7	9.48							5	44999.2
TGME49_321680-t26_1-p1	hypothetical protein	TGME49_321680	40661	2	6.72													2	43782
TGME49_203370-t26_1-p1	hypothetical protein	TGME49_203370	81062	4	7.75							4	43481
TGME49_214210-t26_1-p1	rRNA pseudouridine synthase	TGME49_214210	56744	3	7.92											3	40339.2	1	2739.72
TGME49_244100-t26_1-p1	snoRNA binding domain-containing protein	TGME49_244100	59851	4	9.4									3	42220.8
TGME49_315270-t26_1-p1	hypothetical protein	TGME49_315270	84600	6	11.41							4	36177.4					1	4954.34
TGME49_231210-t26_1-p1	sarcalumenin/eps15 family protein	TGME49_231210	66866	5	8.42									1	4033.06	3	36995.1
TGME49_252510-t26_1-p1	hypothetical protein	TGME49_252510	80604	5	8.68							5	40390.3
TGME49_299780-t26_1-p1	hypothetical protein	TGME49_299780	59371	3	3.67													3	40173.1
TGME49_202770-t26_1-p1	RNA recognition motif-containing protein	TGME49_202770	55868	1	3.01											1	39388.7
TGME49_216860-t26_1-p1	DEAD (Asp-Glu-Ala-Asp) box polypeptide DDX39	TGME49_216860	49114	3	4.84													3	38470
TGME49_204480-t26_1-p1	thioredoxin domain-containing protein	TGME49_204480	72203	2	3.49											2	38407.1
TGME49_289550-t26_1-p1	WD domain, G-beta repeat-containing protein	TGME49_289550	57271	2	6.23									1	34574.8	1	2831.22
TGME49_257350-t26_1-p1	eukaryotic translation initiation factor, putative	TGME49_257350	89776	4	5.98							3	26830.1			1	6243.19	1	4192.38
TGME49_242660-t26_1-p1	vacuolar sorting protein 35, putative	TGME49_242660	95636	3	5.05							3	37030.3
TGME49_229000-t26_1-p1	kelch repeat-containing protein	TGME49_229000	68113	2	3.71									2	36988.1
TGME49_310570-t26_1-p1	hypothetical protein	TGME49_310570	44869	1	3.09											1	36802
TGME49_263180-t26_1-p1	myosin D	TGME49_263180	91052	5	6.33							4	36535.5
TGME49_243240-t26_1-p1	WD domain, G-beta repeat-containing protein	TGME49_243240	53771	2	3.08											2	36301.4
TGME49_321420-t26_1-p1	kelch repeat-containing protein	TGME49_321420	61088	2	4.15											2	36096.5
TGME49_257100-t26_1-p1	hypothetical protein	TGME49_257100	62906	5	8.33											4	36036.9
TGME49_318580-t26_1-p1	glucosephosphate-mutase GPM2	TGME49_318580	65882	2	3.18											2	35602.1
TGME49_295125-t26_1-p1	rhoptry protein ROP4	TGME49_295125	42389	5	12.3													1	34096.3
TGME49_204340-t26_1-p1	hypothetical protein	TGME49_204340	97095	3	3.65							3	33651.9
TGME49_263060-t26_1-p1	Proteasome/cyclosome repeat-containing protein	TGME49_263060	125593	6	7.96					6	33273.6
TGME49_279100-t26_1-p1	hypothetical protein	TGME49_279100	47694	1	2.3													1	32615
TGME49_227620-t26_1-p1	dense granule protein GRA2	TGME49_227620	19804	1	5.95	1	31373.6
TGME49_308040-t26_1-p1	ZPR1 zinc finger domain-containing protein	TGME49_308040	62986	3	7.75									3	30510.8
TGME49_307590-t26_1-p1	hypothetical protein	TGME49_307590	92380	1	1.86											1	30349
TGME49_211670-t26_1-p1	S1 RNA binding domain-containing protein	TGME49_211670	42217	4	15.08													3	29014
TGME49_319340-t26_1-p1	hypothetical protein	TGME49_319340	52403	2	4.16													2	27831.7
TGME49_289330-t26_1-p1	ubiquitin carboxyl-terminal hydrolase family 2 protein	TGME49_289330	248338	7	3.57	1	732.277	7	20674.6	3	6255.42
TGME49_252220-t26_1-p1	tetratricopeptide repeat domain containing protein	TGME49_252220	63343	3	6.02									2	19323.1	1	8336.63
TGME49_220610-t26_1-p1	protein phosphatase 2C domain-containing protein	TGME49_220610	58057	2	4.74											2	26509.2
TGME49_307570-t26_1-p1	glycerol-3-phosphate dehydrogenase (gpdh), putative	TGME49_307570	98815	3	3.66													3	26266.9
TGME49_206610-t26_1-p1	pyruvate dehydrogenase complex subunit PDH-E2	TGME49_206610	96880	4	7.21							4	26236.7
TGME49_264450-t26_1-p1	DNA topoisomerase III beta-1, putative	TGME49_264450	94886	4	7.04							4	26235.8
TGME49_305770-t26_1-p1	ABC transporter, ATP-binding domain-containing protein	TGME49_305770	50658	3	6.48													3	26091
TGME49_255890-t26_1-p1	pyridine nucleotide-disulfide oxidoreductase domain-containing protein	TGME49_255890	85898	3	4.7							3	19521.7	1	6364.63
TGME49_257990-t26_1-p1	heat shock protein 101, putative	TGME49_257990	104297	5	7.01							5	25296.1
TGME49_314430-t26_1-p1	serine/threonine specific protein phosphatase	TGME49_314430	53794	2	3.34													2	24892.2
TGME49_216050-t26_1-p1	tetratricopeptide repeat-containing protein	TGME49_216050	59519	3	7.32											3	24804.6
TGME49_243960-t26_1-p1	nuclear transport factor 2 (ntf2) domain-containing protein	TGME49_243960	84196	4	7.9							4	24005
TGME49_265150-t26_1-p1	hypothetical protein	TGME49_265150	52649	3	9.43													2	23908
TGME49_289690-t26_1-p1	glyceraldehyde-3-phosphate dehydrogenase GAPDH1	TGME49_289690	53339	2	5.93							1	6950.58			1	16895.1
TGME49_286920-t26_1-p1	SWIRM domain-containing protein	TGME49_286920	83974	5	7.56							3	13781	3	9960.57
TGME49_222360-t26_1-p1	hypothetical protein	TGME49_222360	83333	3	4.39							3	23705.5
TGME49_241150-t26_1-p1	hypothetical protein	TGME49_241150	65206	2	3.55									2	23588.1
TGME49_288460-t26_1-p1	hypothetical protein	TGME49_288460	198470	9	6.99	1	784.169	7	17242.6	3	4750.01	1	766.282
TGME49_233310-t26_1-p1	peptidase D, putative	TGME49_233310	67077	3	6.84											3	23331.1
TGME49_289010-t26_1-p1	RNA recognition motif-containing protein	TGME49_289010	102900	1	0.95									1	22338.1
TGME49_250770-t26_1-p1	eukaryotic initiation factor-4A, putative	TGME49_250770	46673	1	2.43									1	4370.44			1	17406.9
TGME49_205320-t26_1-p1	hypothetical protein	TGME49_205320	70850	3	7.33							3	21754.3
TGME49_209210-t26_1-p1	hypothetical protein	TGME49_209210	165808	6	5.32					4	21505
TGME49_285720-t26_1-p1	ATP binding protein, putative	TGME49_285720	45735	2	4.64													2	21358.4
TGME49_214260-t26_1-p1	alpha-glucan water dikinase 1, putative	TGME49_214260	191685	6	4.72			5	20516.2	1	582.476
TGME49_277720-t26_1-p1	GDA1/CD39 (nucleoside phosphatase) family protein	TGME49_277720	92539	5	7.47									4	20985.7
TGME49_265180-t26_1-p1	hypothetical protein	TGME49_265180	48374	2	5.53													2	20272.5
TGME49_306910-t26_1-p1	hypothetical protein	TGME49_306910	55691	2	4.42													2	19997.8
TGME49_201380-t26_1-p1	chorismate synthase, putative	TGME49_201380	58104	2	5.97											2	17801.5	1	2190.37
TGME49_249610-t26_1-p1	hypothetical protein	TGME49_249610	135999	5	6.49					4	19719.1
TGME49_272640-t26_1-p1	eukaryotic initiation factor-2B, epsilon subunit, putative	TGME49_272640	92849	3	5.36							3	19699.2
TGME49_213392-t26_1-p1	surface antigen repeat-containing protein	TGME49_213392	253281	8	4.23					8	19536.5
TGME49_224460-t26_1-p1	aminopeptidase n, putative	TGME49_224460	108718	4	4.23							3	19110
TGME49_221690-t26_1-p1	hypothetical protein	TGME49_221690	149621	4	2.55					4	19059.8
TGME49_218250-t26_1-p1	TAP42 family protein	TGME49_218250	56862	2	3.52													2	18860.4
TGME49_233820-t26_1-p1	DNA polymerase epsilon subunit B protein	TGME49_233820	65701	1	1.63									1	18816.2
TGME49_263070-t26_1-p1	CMGC kinase, CK2 family	TGME49_263070	59824	3	6.49													3	18710
TGME49_293630-t26_1-p1	hypothetical protein	TGME49_293630	89576	2	3.21							2	18384.4
TGME49_222220-t26_1-p1	alveolin domain containing intermediate filament IMC7	TGME49_222220	46812	1	3.5													1	18250.3
TGME49_294550-t26_1-p1	dynein heavy chain	TGME49_294550	558602	26	6.01	22	16349.8	4	1698.86
TGME49_204400-t26_1-p1	ATPase synthase subunit alpha, putative	TGME49_204400	62146	4	6.24													2	17744.6
TGME49_320670-t26_1-p1	vacuolar protein sorting 16, putative	TGME49_320670	101500	3	3.7							2	17696.2
TGME49_276170-t26_1-p1	phosphatidylinositol 3- and 4-kinase	TGME49_276170	134544	4	4.32					4	12943.3			2	4696
TGME49_267600-t26_1-p1	FHA domain-containing protein	TGME49_267600	84417	4	6.82							3	17188.9
TGME49_293380-t26_1-p1	histone lysine acetyltransferase HAT1	TGME49_293380	82423	1	1.35							1	17136.8
TGME49_306540-t26_1-p1	phosphotransferase enzyme family protein	TGME49_306540	59879	4	10.97											3	16852.3
TGME49_306060-t26_1-p1	rhoptry neck protein RON8	TGME49_306060	328900	12	5.27	9	14146.3	2	589.806									1	1971.21
TGME49_213520-t26_1-p1	peptidase M20D, amidohydrolase	TGME49_213520	55117	1	2.14													1	16179.7
TGME49_311470-t26_1-p1	rhoptry neck protein RON5	TGME49_311470	187410	4	2.29							3	16179.5
TGME49_237500-t26_1-p1	protein phosphatase 2C domain-containing protein	TGME49_237500	97305	4	5.28							4	13509	1	2596.86
TGME49_258210-t26_1-p1	DNA-directed RNA polymerase II RPB2	TGME49_258210	140951	3	2.07					3	16063.1
TGME49_213900-t26_1-p1	regulator of chromosome condensation RCC1	TGME49_213900	122605	4	4.94					3	14476.5	1	1427.55
TGME49_320630-t26_1-p1	phosphotransferase enzyme family protein	TGME49_320630	69384	2	4.29									2	15075.8
TGME49_239110-t26_1-p1	leucine rich repeat-containing protein	TGME49_239110	28006	1	3.73					1	4496.06	1	10548.9
TGME49_238050-t26_1-p1	nuclease and tudor domain-containing protein	TGME49_238050	104042	3	3.4	1	2631.22	2	7202.31	1	5092.09
TGME49_257150-t26_1-p1	NOT2 / NOT3 / NOT5 family protein	TGME49_257150	53120	2	6.61											2	9566.71	1	5266
TGME49_267800-t26_1-p1	dynamin-related protein DRPA	TGME49_267800	87397	4	5.87							3	14657
TGME49_288570-t26_1-p1	hypothetical protein	TGME49_288570	44887	1	3.12													1	14568.9
TGME49_263090-t26_1-p1	14-3-3 protein	TGME49_263090	37174	1	4.95							1	14551.1
TGME49_297720-t26_1-p1	trehalose-phosphatase	TGME49_297720	136691	3	2.21					3	14251.7
TGME49_305780-t26_1-p1	5'-3' exoribonuclease, putative	TGME49_305780	138629	3	3.31					2	10819.2					1	3150.22
TGME49_280560-t26_1-p1	selenide, water dikinase	TGME49_280560	137875	3	2.47	1	894.739			2	8560.43	1	1111.97	2	2800.56			1	421.158
TGME49_202460-t26_1-p1	diacylglycerol kinase accessory domain (presumed) domain-containing protein	TGME49_202460	72936	1	2.06									1	5685.54	1	7773.28
TGME49_288740-t26_1-p1	L-asparaginase, putative	TGME49_288740	71027	1	2.38									1	13387.9
TGME49_232350-t26_1-p1	lactate dehydrogenase LDH1	TGME49_232350	35548	1	3.65					1	7972.08	1	5107.46
TGME49_254570-t26_1-p1	hypothetical protein	TGME49_254570	221185	7	4.97			7	12862.3
TGME49_214200-t26_1-p1	WD domain, G-beta repeat-containing protein	TGME49_214200	150519	5	4.58					5	12844.3
TGME49_305980-t26_1-p1	pyruvate dehydrogenase complex subunit PDH-E3I	TGME49_305980	66839	2	4.39													2	12843.3
TGME49_223710-t26_1-p1	tetratricopeptide repeat-containing protein	TGME49_223710	109194	4	4.46							4	12759.9
TGME49_229930-t26_1-p1	p25-alpha family protein	TGME49_229930	17340	1	7.98					1	5720.86	1	7023.48
TGME49_275690-t26_1-p1	ClpB, putative	TGME49_275690	114550	5	6.95							4	12743.5
TGME49_246740-t26_1-p1	hypothetical protein	TGME49_246740	64741	1	3.21									1	12360.7
TGME49_313100-t26_1-p1	signal recognition particle SRP54 protein	TGME49_313100	62791	2	5.5											2	12275
TGME49_308890-t26_1-p1	transcription elongation factor SPT6	TGME49_308890	366029	6	2.2	1	506.774	6	11765.6
TGME49_268580-t26_1-p1	hypothetical protein	TGME49_268580	53630	2	5.25													2	12017
TGME49_213770-t26_1-p1	Superkiller viralicidic activity 2 family 2, putative	TGME49_213770	135032	4	4.64					4	12016.4
TGME49_229750-t26_1-p1	hypothetical protein	TGME49_229750	146076	3	2.64					3	11959.6
TGME49_214820-t26_1-p1	G-patch domain-containing protein	TGME49_214820	49582	1	3											1	11880.2
TGME49_215730-t26_1-p1	Gas41, putative	TGME49_215730	54702	1	3.09											1	11870.4
TGME49_280600-t26_1-p1	histidyl-tRNA synthetase (HisRS), putative	TGME49_280600	134876	4	3.35	1	1507.58			2	10237.4
TGME49_254480-t26_1-p1	WD domain, G-beta repeat-containing protein	TGME49_254480	86891	2	4.53							1	11681.6
TGME49_213740-t26_1-p1	hypothetical protein	TGME49_213740	91858	3	4.87							3	11675.8
TGME49_248120-t26_1-p1	hypothetical protein	TGME49_248120	100764	2	1.77							2	11582.9
TGME49_243920-t26_1-p1	DNA replication licensing factor MCM5, putative	TGME49_243920	88212	1	1.26							1	11426.4
TGME49_294620-t26_1-p1	eukaryotic initiation factor-3, subunit 8, putative	TGME49_294620	109193	2	2.88	1	740.802	1	8270.11	1	2405.89
TGME49_263580-t26_1-p1	bromodomain-containing protein	TGME49_263580	76521	2	4.06							2	11384
TGME49_262730-t26_1-p1	rhoptry protein ROP16	TGME49_262730	76216	1	1.7													1	11113.3
TGME49_221190-t26_1-p1	mrna cleavage factor family protein, putative	TGME49_221190	45796	1	1.69													1	11021.4
TGME49_308920-t26_1-p1	splicing factor U2AF protein	TGME49_308920	83179	1	2.34							1	3905.45			1	5012.13	1	1500.7
TGME49_278470-t26_1-p1	hypothetical protein	TGME49_278470	66650	2	3.89									2	10238.2
TGME49_205010-t26_1-p1	U2 small nuclear ribonucleoprotein family protein, putative	TGME49_205010	150782	2	2.02					1	6592.05	1	3535.57
TGME49_269650-t26_1-p1	FFD and TFG box motifs protein	TGME49_269650	51441	1	2.44											1	10076.3
TGME49_297530-t26_1-p1	DNA-directed RNA polymerase I RPA2	TGME49_297530	153521	3	2.88					3	10065.2
TGME49_206510-t26_1-p1	toxolysin TLN4	TGME49_206510	246741	3	1.75											2	9980.08
TGME49_290340-t26_1-p1	HEAT repeat-containing protein	TGME49_290340	47960	1	1.81					1	9940.79
TGME49_295730-t26_1-p1	tetratricopeptide repeat-containing protein	TGME49_295730	47415	1	2.61													1	9909.54
TGME49_239300-t26_1-p1	hypothetical protein	TGME49_239300	139185	2	1.79					2	9903.34
TGME49_205130-t26_1-p1	hypothetical protein	TGME49_205130	518663	5	0.87									3	4187.8	3	5616.25
TGME49_203380-t26_1-p1	DnaJ domain-containing protein	TGME49_203380	81364	3	5.46							2	9673.36
TGME49_237220-t26_1-p1	DNA replication licensing factor Mcm7, putative	TGME49_237220	96875	3	3.58							3	9642.51
TGME49_210360-t26_1-p1	DEAD (Asp-Glu-Ala-Asp) box polypeptide 41 family protein	TGME49_210360	73228	2	3.65									2	9140.29
TGME49_269885-t26_1-p1	rhoptry metalloprotease toxolysin TLN1	TGME49_269885	182009	3	1.95					3	9078.25
TGME49_216650-t26_1-p1	S15 sporozoite-expressed protein	TGME49_216650	48988	1	2.98							1	3797.83			1	5252.3
TGME49_240840-t26_1-p1	histone lysine demethylase JmjC NO66	TGME49_240840	55992	1	1.57													1	8980.94
TGME49_221670-t26_1-p1	transcriptional elongation factor FACT140	TGME49_221670	134599	3	2.84					3	8837.92
TGME49_205250-t26_1-p1	rhoptry protein ROP18	TGME49_205250	62666	1	1.81													1	8668.98
TGME49_247600-t26_1-p1	hypothetical protein	TGME49_247600	75014	1	1.43							1	8607.21
TGME49_279390-t26_1-p1	proliferation-associated protein 2G4, putative	TGME49_279390	50342	1	2.38											1	2512.99	1	6077.15
TGME49_314740-t26_1-p1	PSP protein	TGME49_314740	82306	1	2.77							1	8515.55
TGME49_309770-t26_1-p1	hypothetical protein	TGME49_309770	185868	1	0.69											1	8408.21
TGME49_217680-t26_1-p1	hypothetical protein	TGME49_217680	246147	6	2.91	5	4304.15	2	3141.15	1	505.885	1	442.418
TGME49_240650-t26_1-p1	coatomer protein complex, subunit alpha, putative	TGME49_240650	142954	2	1.23					1	3580.48	1	4728.67
TGME49_233010-t26_1-p1	cell-cycle-assocaited protein kinase ERK7, putative	TGME49_233010	73113	1	1.92													1	8252.22
TGME49_245500-t26_1-p1	dipeptidyl peptidase iv (dpp iv) n-terminal region domain-containing protein	TGME49_245500	205660	3	2.71			3	8235.34
TGME49_212250-t26_1-p1	XPG N-terminal domain-containing protein	TGME49_212250	86945	3	4.3									2	8208.9
TGME49_264430-t26_1-p1	hypothetical protein	TGME49_264430	285105	1	0.42							1	8177.86
TGME49_289300-t26_1-p1	methionyl-tRNA synthetase	TGME49_289300	106101	4	5.12					1	4653.89	3	3500.5
TGME49_260140-t26_1-p1	phosphomannose isomerase type I protein	TGME49_260140	82223	2	4.37							2	8144.3
TGME49_262960-t26_1-p1	U1 snRNP-associated protein Usp106, putative	TGME49_262960	44776	1	3.3													1	8138.18
TGME49_209240-t26_1-p1	RNA methyltransferase	TGME49_209240	51699	1	2.11													1	8087.15
TGME49_289380-t26_1-p1	hypothetical protein	TGME49_289380	100247	2	3.04							2	7950.66
TGME49_246500-t26_1-p1	surp module domain-containing protein	TGME49_246500	71702	1	2.28							1	7930.61
TGME49_275990-t26_1-p1	hypothetical protein	TGME49_275990	126244	1	1.11					1	7918.85
TGME49_308950-t26_1-p1	histidine acid phosphatase superfamily protein	TGME49_308950	66303	1	1.67											1	7657.92
TGME49_235020-t26_1-p1	COPI protein, putative	TGME49_235020	137057	2	1.51							2	7581.57
TGME49_215040-t26_1-p1	HEAT repeat-containing protein	TGME49_215040	181968	6	5.83			5	6659.32	2	795.729
TGME49_226660-t26_1-p1	hypothetical protein	TGME49_226660	389806	6	2.06	6	5982.49	2	1446.07
TGME49_288800-t26_1-p1	endonuclease/exonuclease/phosphatase family protein	TGME49_288800	91411	1	1.07							1	7341.07
TGME49_267330-t26_1-p1	fumarate hydratase	TGME49_267330	84294	1	1.55											1	7205.52
TGME49_212960-t26_1-p1	hypothetical protein	TGME49_212960	47540	1	2.64													1	6985.84
TGME49_222100-t26_1-p1	hypothetical protein	TGME49_222100	128318	3	2.63									2	4381.31			1	2589.85
TGME49_244380-t26_1-p1	cactin	TGME49_244380	79543	1	1.6							1	6966.3
TGME49_288290-t26_1-p1	hypothetical protein	TGME49_288290	55062	1	2.38											1	6962.67
TGME49_315490-t26_1-p1	rhoptry protein ROP10	TGME49_315490	60912	1	2.05									1	6957.92
TGME49_315810-t26_1-p1	tRNA nucleotidyltransferase/poly(A) polymerase family protein	TGME49_315810	122191	2	2.24							1	6949.07
TGME49_224050-t26_1-p1	AP2 domain transcription factor AP2X-4	TGME49_224050	93810	2	3.57							1	6925.57
TGME49_264830-t26_1-p1	hypothetical protein	TGME49_264830	136604	3	3.27					1	747.526	2	6167.33
TGME49_314780-t26_1-p1	myosin G	TGME49_314780	227272	4	2.62			4	6887.83
TGME49_209100-t26_1-p1	PUB domain-containing protein	TGME49_209100	68150	1	1.58									1	6874.06
TGME49_228100-t26_1-p1	hypothetical protein	TGME49_228100	139352	3	2.74					3	6826.99
TGME49_311870-t26_1-p1	WD domain, G-beta repeat-containing protein	TGME49_311870	59644	2	7.1									2	6712.97
TGME49_316660-t26_1-p1	cullin family protein	TGME49_316660	91526	1	1.24							1	6678.84
TGME49_219630-t26_1-p1	flavodoxin domain-containing protein	TGME49_219630	103988	1	1.69									1	6666.47
TGME49_310630-t26_1-p1	hypothetical protein	TGME49_310630	57003	2	4.66											2	6666.46
TGME49_236930-t26_1-p1	hypothetical protein	TGME49_236930	610202	1	0.18					1	6586.67
TGME49_219460-t26_1-p1	hypothetical protein	TGME49_219460	136333	2	2.1					2	6574.62
TGME49_294730-t26_1-p1	hypothetical protein	TGME49_294730	217380	2	1.49							2	2828.91					2	3717.93
TGME49_305320-t26_1-p1	mRNA capping enzyme	TGME49_305320	56738	1	1.57											1	6526.75
TGME49_200470-t26_1-p1	hypothetical protein	TGME49_200470	65106	2	5.19									2	6505.47
TGME49_259950-t26_1-p1	carbonate dehydratase, eukaryotic-type domain-containing protein	TGME49_259950	95166	1	1.63									1	6485.57
TGME49_218200-t26_1-p1	UDP-sugar pyrophospharylase	TGME49_218200	67852	3	6.42									2	6430.46
TGME49_313670-t26_1-p1	adaptin n terminal region domain-containing protein	TGME49_313670	107006	1	0.89							1	6257.51
TGME49_311400-t26_1-p1	WD domain, G-beta repeat-containing protein	TGME49_311400	165572	3	2.33					1	1815.93			2	4435.58
TGME49_222660-t26_1-p1	leucine rich repeat-containing protein	TGME49_222660	192585	3	2.23			3	6154.75
TGME49_295410-t26_1-p1	transcription initiation factor TFIID complex subunit TAF6	TGME49_295410	92831	2	2.92							2	6115.26
TGME49_304680-t26_1-p1	ubiquitin family protein	TGME49_304680	56734	1	2.66											1	6014.45
TGME49_236840-t26_1-p1	zinc finger (C-x8-C-x5-C-x3-H)-2, putative	TGME49_236840	41962	1	3.49													1	5828.38
TGME49_211410-t26_1-p1	translation initiation factor sui1 protein	TGME49_211410	80581	1	1.34							1	5825.16
TGME49_289190-t26_1-p1	tetratricopeptide repeat-containing protein	TGME49_289190	151871	2	1.71					2	5661.07
TGME49_319570-t26_1-p1	WD domain, G-beta repeat-containing protein	TGME49_319570	75759	2	4.06													2	5549.48
TGME49_231940-t26_1-p1	ThiF family protein	TGME49_231940	36031	1	3.85													1	5356.17
TGME49_244880-t26_1-p1	DNA-directed RNA polymerase I RPA1	TGME49_244880	302092	7	3.22	7	5335.13
TGME49_207640-t26_1-p1	isoleucyl-tRNA synthetase family protein	TGME49_207640	141532	3	2.74			1	4028.69	1	1300.9
TGME49_214440-t26_1-p1	4'-phosphopantetheinyl transferase superfamily protein	TGME49_214440	48506	1	4.12													1	5311.44
TGME49_288550-t26_1-p1	hypothetical protein	TGME49_288550	46454	1	2.36													1	5299.16
TGME49_311030-t26_1-p1	hypothetical protein	TGME49_311030	402506	8	2.51	7	5198.93
TGME49_213870-t26_1-p1	UBA/TS-N domain-containing protein	TGME49_213870	117178	2	3.64					1	4976.1
TGME49_258160-t26_1-p1	carbohydrate kinase	TGME49_258160	54724	1	2.17													1	4968.59
TGME49_243540-t26_1-p1	WD domain, G-beta repeat-containing protein	TGME49_243540	77280	1	2.25							1	4959.44
TGME49_291180-t26_1-p1	hypothetical protein	TGME49_291180	574474	11	3.14	9	4017.87	3	579.399	1	340.563
TGME49_254500-t26_1-p1	hypothetical protein	TGME49_254500	60687	1	2.9									1	4909.59
TGME49_258240-t26_1-p1	chromodomain helicase DNA binding protein CHD1/SWI2/SNF2	TGME49_258240	271394	3	1.36			3	4881.28
TGME49_292920-t26_1-p1	heat shock protein 75, putative	TGME49_292920	95159	1	1.05							1	4709.5
TGME49_278900-t26_1-p1	protein kinase, putative	TGME49_278900	64043	1	1.67									1	4705.27
TGME49_311500-t26_1-p1	ThiF family protein	TGME49_311500	93425	1	0.95							1	4671.45
TGME49_201680-t26_1-p1	eukaryotic initiation factor-3 subunit 10, putative	TGME49_201680	119127	1	0.97					1	4564.85
TGME49_240660-t26_1-p1	hypothetical protein	TGME49_240660	54603	1	2.48													1	4557.18
TGME49_231350-t26_1-p1	glucosamine-fructose-6-phosphate aminotransferase	TGME49_231350	96713	2	2.45									1	4556.3
TGME49_234520-t26_1-p1	U2 snRNP auxilliary factor, large subunit, splicing factor subfamily protein	TGME49_234520	59989	1	2.53									1	4520.13
TGME49_314970-t26_1-p1	root hair defective 3 gtp-binding protein (rhd3) protein	TGME49_314970	98254	2	2.35							2	4462.23
TGME49_257480-t26_1-p1	NADP-dependent succinate-semialdehyde dehydrogenase	TGME49_257480	75884	1	1.69											1	4362.67
TGME49_305910-t26_1-p1	hypothetical protein	TGME49_305910	69324	2	4.23									2	4347.38
TGME49_215910-t26_1-p1	hypothetical protein	TGME49_215910	327986	5	2.05	5	4333.03
TGME49_286240-t26_1-p1	kelch repeat protein, putative	TGME49_286240	67371	1	1.6									1	4142.52
TGME49_238510-t26_1-p1	hypothetical protein	TGME49_238510	116255	1	0.83							1	4006.49
TGME49_247450-t26_1-p1	hypothetical protein	TGME49_247450	245871	2	1.91			1	1245.97	2	1500.32	1	415.7			1	833.919
TGME49_309370-t26_1-p1	adaptin n terminal region domain-containing protein	TGME49_309370	144045	2	1.48					1	532.155	2	3461.37
TGME49_239480-t26_1-p1	RNB family domain-containing protein	TGME49_239480	129842	2	1.89					2	3983.53
TGME49_207720-t26_1-p1	hypothetical protein	TGME49_207720	177013	1	0.49					1	3981.51
TGME49_256990-t26_1-p1	glycyl-tRNA synthetase	TGME49_256990	86374	2	4.15							2	3908.71
TGME49_270770-t26_1-p1	PWI domain-containing protein	TGME49_270770	86918	1	2.05							1	3882.5
TGME49_298020-t26_1-p1	DEAD-family helicase	TGME49_298020	130967	3	2.76					1	444.84			2	3381.29
TGME49_237570-t26_1-p1	leucine carboxyl methyltransferase	TGME49_237570	50463	1	2													1	3816.87
TGME49_319658-t26_1-p1	CBF/Mak21 family protein	TGME49_319658	73895	1	1.48									1	3735.15
TGME49_249620-t26_1-p1	histone deacetylase HDAC2	TGME49_249620	67482	2	4.49									2	3642.65
TGME49_273370-t26_1-p1	coatomer gamma 2-subunit protein, putative	TGME49_273370	112294	1	1.15									1	3619.45
TGME49_246040-t26_1-p1	MIF4G domain-containing protein	TGME49_246040	157108	2	1.26					2	3580.94
TGME49_253020-t26_1-p1	hypothetical protein	TGME49_253020	51622	2	6.01													1	3501.46
TGME49_249860-t26_1-p1	hypothetical protein	TGME49_249860	90242	1	2.12							1	3445.45
TGME49_262920-t26_1-p1	trypsin domain-containing protein	TGME49_262920	104525	1	1.34													1	3422.83
TGME49_202950-t26_1-p1	hypothetical protein	TGME49_202950	151800	2	1.27					1	3406.38
TGME49_273990-t26_1-p1	CobW/P47K family protein	TGME49_273990	70809	1	1.85							1	3372.1
TGME49_253900-t26_1-p1	parasite porphobilinogen synthase PBGS	TGME49_253900	71374	1	1.06													1	3344.85
TGME49_294710-t26_1-p1	RNA recognition motif-containing protein	TGME49_294710	122114	4	4.43					1	3338.17
TGME49_208830-t26_1-p1	hypothetical protein	TGME49_208830	54771	1	3.37													1	3302.23
TGME49_211090-t26_1-p1	aminotransferase, class V superfamily protein	TGME49_211090	68283	1	1.9													1	3249.78
TGME49_259830-t26_1-p1	diacylglycerol kinase catalytic domain-containing protein	TGME49_259830	69589	1	1.27											1	3238.6
TGME49_301250-t26_1-p1	hypothetical protein	TGME49_301250	96404	2	2.94							2	3228.5
TGME49_264880-t26_1-p1	NEDD8-activating enzyme E1 catalytic subunit	TGME49_264880	63973	1	2.91									1	1188.87	1	2030.46
TGME49_219710-t26_1-p1	hypothetical protein	TGME49_219710	200026	2	1.16			1	315.815			2	2884.57
TGME49_318620-t26_1-p1	RNA-directed RNA polymerase	TGME49_318620	137057	2	1.36					1	3177.53
TGME49_316700-t26_1-p1	uridine kinase	TGME49_316700	65067	1	2.15									1	3080.47
TGME49_270930-t26_1-p1	hypothetical protein	TGME49_270930	317119	4	1.6	3	1485.56	1	817.712	1	718.018
TGME49_264660-t26_1-p1	SAG-related sequence SRS44	TGME49_264660	262472	3	1.47	3	2976.7
TGME49_293060-t26_1-p1	SPRY domain-containing protein	TGME49_293060	80291	1	2.16							1	2940.32
TGME49_219540-t26_1-p1	cytosolic tRNA-Ala synthetase	TGME49_219540	139516	2	2.19							2	2838.58
TGME49_244690-t26_1-p1	hypothetical protein	TGME49_244690	65004	1	1.93									1	2825.45
TGME49_239790-t26_1-p1	BRCA1 C Terminus (BRCT) domain-containing protein	TGME49_239790	82155	1	2.05							1	2823.97
TGME49_252420-t26_1-p1	histone arginine methyltransferase PRMT3	TGME49_252420	87684	1	2.74							1	2811
TGME49_294770-t26_1-p1	Armadillo/beta-catenin family repeat-containing protein	TGME49_294770	74145	1	1.27									1	2753.56
TGME49_225125-t26_1-p1	pre-rRNA processing protein	TGME49_225125	310135	2	0.94	2	2727.04
TGME49_273920-t26_1-p1	aldose reductase, putative	TGME49_273920	58704	1	1.86											1	2448.03
TGME49_217530-t26_1-p1	hypothetical protein	TGME49_217530	63768	1	1.91											1	2445.91
TGME49_209600-t26_1-p1	hypothetical protein	TGME49_209600	50201	1	2							1	2436.54
TGME49_214090-t26_1-p1	signal peptidase	TGME49_214090	203484	2	1.24			1	2351.36
TGME49_316180-t26_1-p1	hypothetical protein	TGME49_316180	91133	1	0.96							1	2329.54
TGME49_273150-t26_1-p1	zinc finger, C3HC4 type (RING finger) domain-containing protein	TGME49_273150	78603	1	2.55							1	1736.64			1	507.451
TGME49_254470-t26_1-p1	hypothetical protein	TGME49_254470	80478	1	1.91									1	2239.86
TGME49_239590-t26_1-p1	WD domain, G-beta repeat-containing protein	TGME49_239590	74725	1	2.49									1	2200.62
TGME49_246510-t26_1-p1	protein phosphatase 2a regulatory b subunit (b56 family) protein	TGME49_246510	64837	1	1.9											1	1775.98	1	416.217
TGME49_235170-t26_1-p1	ATPase, AAA family protein	TGME49_235170	138106	2	1.98					1	2170.29
TGME49_234490-t26_1-p1	kelch repeat-containing protein	TGME49_234490	164472	1	0.8					1	2152.85
TGME49_249030-t26_1-p1	endonuclease/exonuclease/phosphatase family protein	TGME49_249030	60227	1	4.62											1	2138.44
TGME49_232300-t26_1-p1	ribosomal protein RPS3	TGME49_232300	28737	1	5.49											1	2136.83
TGME49_312230-t26_1-p1	DNA topoisomerase 2, putative	TGME49_312230	185767	1	0.54					1	2136.3
TGME49_280390-t26_1-p1	HEAT repeat-containing protein	TGME49_280390	441040	1	0.22	1	2116.25
TGME49_263420-t26_1-p1	ubiquitin-specific protease USP4	TGME49_263420	129788	1	1.62					1	2100.41
TGME49_225540-t26_1-p1	hypothetical protein	TGME49_225540	52713	1	3.19											1	2078.56
TGME49_287180-t26_1-p1	hypothetical protein	TGME49_287180	239165	3	1.88			2	2037.33
TGME49_267480-t26_1-p1	tRNA (guanine(26)-N(2))-dimethyltransferase, putative	TGME49_267480	76065	1	1.87							1	580.057	1	1450.57
TGME49_249390-t26_1-p1	glutamate/leucine/phenylalanine/valine dehydrogenase family protein	TGME49_249390	135701	2	2.57					1	1925.77
TGME49_215230-t26_1-p1	RNA recognition motif-containing protein	TGME49_215230	80733	1	1.37							1	1904.07
TGME49_303450-t26_1-p1	coatomer gamma subunit	TGME49_303450	33580	1	3.97							1	1847.02
TGME49_269710-t26_1-p1	hypothetical protein	TGME49_269710	170389	2	2.85			1	943.565							1	874.803
TGME49_299810-t26_1-p1	cysteine-tRNA synthetase (CysRS)	TGME49_299810	101371	1	1.45							1	1800.78
TGME49_232050-t26_1-p1	DnaJ domain-containing protein	TGME49_232050	96129	1	1.15							1	1760.21
TGME49_253440-t26_1-p1	cell-cycle-associated protein kinase SRPK, putative	TGME49_253440	187497	1	0.74					1	1717.84
TGME49_267660-t26_1-p1	hypothetical protein	TGME49_267660	170100	3	3.66			2	1682.76
TGME49_314410-t26_1-p1	aquarius, putative	TGME49_314410	251136	1	0.67			1	1662.72
TGME49_242830-t26_1-p1	XRN 5'-3' exonuclease N-terminus protein	TGME49_242830	223765	1	0.54			1	1661.63
TGME49_321640-t26_1-p1	cell division protein CDC48AP	TGME49_321640	112893	4	5.84							2	1652.64
TGME49_244460-t26_1-p1	hypothetical protein	TGME49_244460	127300	1	2.34									1	996.13	1	605.913
TGME49_313665-t26_1-p1	hypothetical protein	TGME49_313665	49488	1	4.59													1	1597.7
TGME49_288840-t26_1-p1	hypothetical protein	TGME49_288840	70722	1	1.23											1	1575.34
TGME49_246170-t26_1-p1	ARID/BRIGHT DNA binding domain-containing protein	TGME49_246170	286303	2	1.11			2	1112.58			1	441.23
TGME49_304955-t26_1-p1	serine/threonine specific protein phosphatase	TGME49_304955	303846	1	0.31											1	1513.94
TGME49_222900-t26_1-p1	phosphoserine phosphatase	TGME49_222900	190477	1	0.46			1	1513.19
TGME49_264860-t26_1-p1	zinc finger, C3HC4 type (RING finger) domain-containing protein	TGME49_264860	414413	2	0.57	2	1507.31
TGME49_258030-t26_1-p1	DNA polymerase	TGME49_258030	139494	2	1.5					2	1471.39
TGME49_204130-t26_1-p1	perforin-like protein PLP1	TGME49_204130	125506	2	2.76							1	1458.6
TGME49_321440-t26_1-p1	SWI2/SNF2 ISWI-like SANT	TGME49_321440	140165	1	1.04					1	1405.99
TGME49_280490-t26_1-p1	U-box domain-containing protein	TGME49_280490	121997	1	0.83					1	1378.48
TGME49_220160-t26_1-p1	WD domain-containing protein	TGME49_220160	59413	1	4.51											1	1366.94
TGME49_207430-t26_1-p1	ATP-dependent RNA helicase DDX1, putative	TGME49_207430	82792	1	2.21							1	1344.43
TGME49_265250-t26_1-p1	RNA recognition motif-containing protein	TGME49_265250	160180	2	2.05							1	454.162			1	886.862
TGME49_212220-t26_1-p1	hypothetical protein	TGME49_212220	107977	1	2.04							1	803.468	1	456.903
TGME49_230940-t26_1-p1	hypothetical protein	TGME49_230940	155051	1	1.18									1	687.11	1	534.801
TGME49_217630-t26_1-p1	hypothetical protein	TGME49_217630	110321	1	0.8													1	1141.07
TGME49_240090-t26_1-p1	rhoptry kinase family protein ROP34, putative	TGME49_240090	61668	1	1.81													1	1134.23
TGME49_298610-t26_1-p1	GYF domain-containing protein	TGME49_298610	237896	2	1.46							1	408.355			1	314.954	1	410.491
TGME49_242610-t26_1-p1	WD domain, G-beta repeat-containing protein	TGME49_242610	62250	1	3.11											1	1123.45
TGME49_233510-t26_1-p1	hypothetical protein	TGME49_233510	27763	1	6.2							1	1054.93
TGME49_219810-t26_1-p1	hypothetical protein	TGME49_219810	106329	1	2.17							1	1054.48
TGME49_269180-t26_1-p1	MIF4G domain-containing protein	TGME49_269180	273011	2	1.5									1	655.579	1	386.123
TGME49_295060-t26_1-p1	exonuclease	TGME49_295060	57462	1	3.27											1	1036.88
TGME49_216590-t26_1-p1	HEAT repeat-containing protein	TGME49_216590	111196	1	1.19					1	395.218	1	639.446
TGME49_310802-t26_1-p1	CRAL/TRIO domain-containing protein	TGME49_310802	55716	1	2.81									1	1014.74
TGME49_203980-t26_1-p1	hypothetical protein	TGME49_203980	201280	2	1.98			2	993.922
TGME49_240220-t26_1-p1	hypothetical protein	TGME49_240220	166358	1	1.12					1	583.526	1	369.568
TGME49_282090-t26_1-p1	hypothetical protein	TGME49_282090	60527	1	2.77											1	947.785
TGME49_247195-t26_1-p1	microneme protein MIC15	TGME49_247195	319972	1	0.27			1	929.991
TGME49_267710-t26_1-p1	CPSF A subunit region protein	TGME49_267710	224032	1	0.53			1	921.189
TGME49_232190-t26_1-p1	Sec7 domain-containing protein	TGME49_232190	354634	2	0.67	2	915.604
TGME49_224060-t26_1-p1	thioredoxin, putative	TGME49_224060	68948	1	2.73											1	905.44
TGME49_271910-t26_1-p1	DnaJ domain-containing protein	TGME49_271910	56114	1	3.28											1	901.323
TGME49_315080-t26_1-p1	hypothetical protein	TGME49_315080	165814	1	0.72							1	861.507
TGME49_270865-t26_1-p1	adenylate cyclase, putative	TGME49_270865	222746	1	0.88			1	836.868
TGME49_214830-t26_1-p1	hypothetical protein	TGME49_214830	163974	1	0.6					1	776.328
TGME49_260200-t26_1-p1	helicase associated domain (ha2) protein	TGME49_260200	141771	1	0.86					1	765.077
TGME49_226910-t26_1-p1	Amylo-alpha-1,6-glucosidase	TGME49_226910	208019	1	0.64			1	764.923
TGME49_288040-t26_1-p1	hypothetical protein	TGME49_288040	138625	1	1.47					1	729.598
TGME49_273560-t26_1-p1	kinesin heavy chain, putative	TGME49_273560	181383	1	0.67									1	234.619	1	478.14
TGME49_265010-t26_1-p1	glutamate 5-kinase domain-containing protein	TGME49_265010	101291	1	1.61							1	711.899
TGME49_221320-t26_1-p1	acetyl-CoA carboxylase ACC1	TGME49_221320	287682	2	0.8			2	682.962
TGME49_315720-t26_1-p1	Smg-4/UPF3 family protein	TGME49_315720	62257	1	2.02											1	680.405
TGME49_218610-t26_1-p1	ATPase (DUF699) protein	TGME49_218610	136211	1	0.8					1	669.705
TGME49_285250-t26_1-p1	hypothetical protein	TGME49_285250	121221	1	0.78											1	648.182
TGME49_280540-t26_1-p1	HEAT repeat-containing protein	TGME49_280540	365273	2	0.5	2	611.776
TGME49_273580-t26_1-p1	hypothetical protein	TGME49_273580	155196	1	0.63					1	609.735
TGME49_295710-t26_1-p1	HECT-domain (ubiquitin-transferase) domain-containing protein	TGME49_295710	851253	4	0.63	2	513.789	1	78.3863
TGME49_318510-t26_1-p1	N-ethylmaleimide-sensitive fusion protein, putative	TGME49_318510	83467	1	1.07							1	570.093
TGME49_309570-t26_1-p1	DEAD/DEAH box helicase domain-containing protein	TGME49_309570	91893	1	2.26							1	525.261
TGME49_308590-t26_1-p1	Mov34/MPN/PAD-1 family protein	TGME49_308590	53643	1	2.45													1	510.588
TGME49_294380-t26_1-p1	PP-loop domain-containing protein	TGME49_294380	184739	1	0.53			1	468.785
TGME49_269990-t26_1-p1	hypothetical protein	TGME49_269990	216243	1	0.46			1	466.298
TGME49_249530-t26_1-p1	exportin 1, putative	TGME49_249530	129092	1	1.24			1	445.689
TGME49_218580-t26_1-p1	RNA methyltransferase, TrmH family protein	TGME49_218580	310823	2	0.76	2	437.871
TGME49_296010-t26_1-p1	phosphatidylinositol 3- and 4-kinase	TGME49_296010	169559	1	0.88					1	416.934
TGME49_243590-t26_1-p1	endonuclease/exonuclease/phosphatase family protein	TGME49_243590	121464	1	1.17							1	390.051
TGME49_291820-t26_1-p1	RNA helicase (UPF2 interacting domain) protein	TGME49_291820	163448	1	1.04					1	376.42
TGME49_321450-t26_1-p1	Myb family DNA-binding domain-containing protein	TGME49_321450	437021	1	0.26	1	372.707
TGME49_222430-t26_1-p1	HECT-domain (ubiquitin-transferase) domain-containing protein	TGME49_222430	180697	1	0.89					1	361.861
TGME49_204160-t26_1-p1	GYF domain-containing protein	TGME49_204160	189982	1	0.49					1	290.402
TGME49_221610-t26_1-p1	ubiquitin carboxyl-terminal hydrolase	TGME49_221610	87237	1	1.76							1	274.78
TGME49_293480-t26_1-p1	MoeA N-terminal region (domain I and II) domain-containing protein	TGME49_293480	133823	1	1.12					1	274.336
TGME49_206670-t26_1-p1	hypothetical protein	TGME49_206670	218498	1	0.97					1	258.633
TGME49_300120-t26_1-p1	aminotransferase, class V superfamily protein	TGME49_300120	89642	1	3.07											1	254.31
TGME49_278500-t26_1-p1	ribosomal RNA large subunit methyltransferase J protein	TGME49_278500	158354	2	1.97					1	249.946
TGME49_270620-t26_1-p1	DEAD/DEAH box helicase domain-containing protein	TGME49_270620	102414	1	1.17							1	214.442
TGME49_306660-t26_1-p1	RNA pseudouridine synthase superfamily protein	TGME49_306660	676329	1	0.29			1	93.5888	1	83.4515
TGME49_268370-t26_1-p1	non-specific serine/threonine protein kinase	TGME49_268370	904538	1	0.19	1	151.224
TGME49_307040-t26_1-p1	shikimate dehydrogenase substrate binding domain-containing protein	TGME49_307040	349119	1	0.34	1	103.855
TGME49_321560-t26_1-p1	zinc knuckle domain-containing protein	TGME49_321560	85228	1	1.43
TGME49_320010-t26_1-p1	hypothetical protein	TGME49_320010	98244	1	1.24
TGME49_310210-t26_1-p1	hypothetical protein	TGME49_310210	83637	1	1.14
TGME49_308870-t26_1-p1	hypothetical protein	TGME49_308870	75175	1	1.3
TGME49_305860-t26_1-p1	calcium-dependent protein kinase CDPK3	TGME49_305860	60430	3	6.52
TGME49_290290-t26_1-p1	ubiquitin-activating enzyme E1 family protein	TGME49_290290	119811	1	1.65
TGME49_286800-t26_1-p1	hypothetical protein	TGME49_286800	91263	1	1.54
TGME49_285230-t26_1-p1	PRP38 family protein	TGME49_285230	68774	1	2.44
TGME49_280700-t26_1-p1	arginine decarboxylase	TGME49_280700	135672	1	1.22
TGME49_257030-t26_1-p1	hypothetical protein	TGME49_257030	55367	1	3.73
TGME49_255350-t26_1-p1	ATPase, putative	TGME49_255350	71994	1	1.98
TGME49_251880-t26_1-p1	tRNA synthetases class I family protein	TGME49_251880	60170	1	1.85
TGME49_244290-t26_1-p1	adapter-related protein	TGME49_244290	119953	1	1.34
TGME49_243930-t26_1-p1	hypothetical protein	TGME49_243930	101348	1	1.48
TGME49_231960-t26_1-p1	omega secalin, putative	TGME49_231960	201902	2	2.05
TGME49_230210-t26_1-p1	alveolin domain containing intermediate filament IMC10	TGME49_230210	61188	1	3.75
TGME49_228210-t26_1-p1	26S proteasome regulatory subunit	TGME49_228210	44455	2	4.77
TGME49_226620-t26_1-p1	hypothetical protein	TGME49_226620	394806	1	0.29
TGME49_226560-t26_1-p1	zinc finger (CCCH type) motif-containing protein	TGME49_226560	45182	1	2.24
TGME49_222160-t26_1-p1	aldehyde dehydrogenase	TGME49_222160	53702	2	4.43
TGME49_219790-t26_1-p1	pre-mRNA processing factor PRP3	TGME49_219790	76834	1	1.3
TGME49_214270-t26_1-p1	translation initiation factor IF-2, putative	TGME49_214270	126068	2	2.88
TGME49_210730-t26_1-p1	ATP-dependent hsl protease ATP-binding subunit hslU, putative	TGME49_210730	73067	1	2.68
L0R5A1_HUMAN	Alternative protein CSF2RB	CSF2RB	11646	1	7.41													1	1.60666e+07
ANM5_HUMAN	Protein arginine N-methyltransferase 5	PRMT5	72684	24	32.5	1	21373.9	5	73794.5	4	109497	5	97882.9	24	5.97411e+06
V9HWE1_HUMAN	Vimentin	HEL113	53652	38	56.22							1	3879.84			1	6896.64	35	5.90668e+06
A0A024R1N1_HUMAN	Myosin, heavy polypeptide 9, non-muscle, isoform CRA_a	MYH9	226532	149	56.33	45	198880	120	3.8609e+06	78	1.05555e+06	50	444863	29	189877	10	46182.3	5	9683.43
BIP_HUMAN	Endoplasmic reticulum chaperone BiP	HSPA5	72333	35	44.95									31	3.17572e+06
A0A024R8S5_HUMAN	Protein disulfide-isomerase	P4HB	57116	21	37.99					12	235217	1	4035.59			15	1.41011e+06	16	669344
A0A024R3X4_HUMAN	60 kDa chaperonin (Fragment)	HSPD1	61055	21	36.82											21	1.759e+06
ENPL_HUMAN	Endoplasmin	HSP90B1	92469	25	27.65	2	5871.34			1	6287.93	22	1.11055e+06
A0A024RD18_HUMAN	Serine/threonine kinase 38, isoform CRA_a	STK38	54190	15	33.55											2	114307	15	825340
A0A024R9Q1_HUMAN	Thrombospondin 1, isoform CRA_a	THBS1	129353	27	23.85	6	16505.1	4	13107.6	26	773473	1	1643.76	1	1162.99
H7C4K7_HUMAN	Uncharacterized protein (Fragment)		12310	1	8.41			1	324675	1	358755
A0A1W2PQU7_HUMAN	Glial fibrillary acidic protein (Fragment)	GFAP	3431	1	31.03													1	682017
A0A0S2Z377_HUMAN	Annexin (Fragment)	ANXA6	75277	24	41.98							1	3242.07	23	547511
A0A024RC61_HUMAN	Aminopeptidase	ANPEP	109540	19	19.54			1	5119.19	19	520241
A0A024RAM4_HUMAN	Microtubule-associated protein 1B, isoform CRA_b	MAP1B	270620	44	20.26	36	297942	16	68324.8	11	41631.6	8	57217.2	7	19732.4
MYH10_HUMAN	Myosin-10	MYH10	228999	58	34.16	2	1375.28	36	401118	12	46856.7	5	22024.1	2	1029.07
A0A024R884_HUMAN	Tenascin C (Hexabrachion), isoform CRA_a	TNC	240909	31	19.31	10	43208	26	332872	9	72802.5
MVP_HUMAN	Major vault protein	MVP	99327	15	19.37	2	2734.82	3	18675.8			15	407905
FLNA_HUMAN	Filamin-A	FLNA	280739	50	26.18	40	261596	23	112627	14	36811.7	1	1817.22	2	368.006	1	515.163	1	1566.82
ATPA_HUMAN	ATP synthase subunit alpha, mitochondrial	ATP5F1A	59751	11	20.43													11	344324
P4HA1_HUMAN	Prolyl 4-hydroxylase subunit alpha-1	P4HA1	61049	10	23.6											9	309475
CO6A3_HUMAN	Collagen alpha-3(VI) chain	COL6A3	343669	65	23.36	55	214405	28	81225.3
L0R5F6_HUMAN	Alternative protein TNS4	TNS4	6049	1	25.45											1	290392
B3KQT2_HUMAN	Protein disulfide-isomerase		54903	10	18.97											8	124600	8	137002
H7BZJ3_HUMAN	Protein disulfide-isomerase A3 (Fragment)	PDIA3	13519	3	29.27											1	113180	1	118504
AL1A1_HUMAN	Retinal dehydrogenase 1	ALDH1A1	54862	8	23.95													8	229501
A0A384P5G6_HUMAN	75 kDa glucose-regulated protein		73680	11	22.09									11	228269
A0A1Z1VXF2_HUMAN	CD44 antigen (Fragment)	CD44	21862	2	11.06									2	227393
CALR_HUMAN	Calreticulin	CALR	48142	5	17.75													5	223352
KPYM_HUMAN	Pyruvate kinase PKM	PKM	57937	11	26.18											10	216103	1	5849.16
5NTD_HUMAN	5'-nucleotidase	NT5E	63368	7	15.33									7	197820
B3KQ76_HUMAN	cDNA FLJ33025 fis, clone THYMU1000558, highly similar to Homo sapiens SEC22 vesicle trafficking protein-like 2 (S. cerevisiae) (SEC22L2), mRNA		34976	1	3.26													1	196005
A0A087X054_HUMAN	Hypoxia up-regulated protein 1	HYOU1	104779	16	22.31					15	184981	1	1984.64
ATPB_HUMAN	ATP synthase subunit beta, mitochondrial	ATP5F1B	56560	13	28.36													12	179336
COCA1_HUMAN	Collagen alpha-1(XII) chain	COL12A1	333147	42	16.52	41	168430	1	1363.84
P4HA2_HUMAN	Prolyl 4-hydroxylase subunit alpha-2	P4HA2	60902	9	21.31											6	116967	4	52025.2
A0A087WVQ6_HUMAN	Clathrin heavy chain	CLTC	192058	21	16.08			2	1271.24	20	156076
A0A384NYT8_HUMAN	Tubulin beta chain (Fragment)		49469	13	28.05													11	153426
B4DNU9_HUMAN	cDNA FLJ55731, highly similar to Polymerase I and transcript release factor		41569	4	19.09													3	152275
A0A384N6H1_HUMAN	Epididymis secretory sperm binding protein		95338	12	15.97							11	147172
A0A024R0H7_HUMAN	Testis tissue sperm-binding protein Li 44a	WDR77	36724	2	6.43			1	24785.2	1	27193.8			1	16107.9	1	40390.1	1	31635.5
HSP7C_HUMAN	Heat shock cognate 71 kDa protein	HSPA8	70898	19	30.03									9	134815
E9PQW2_HUMAN	NADH-cytochrome b5 reductase 2 (Fragment)	CYB5R2	21475	1	6.88			1	132897
B4DHG3_HUMAN	Procollagen-lysine 5-dioxygenase		81140	11	19.06							10	123154
A0A024R5Z7_HUMAN	Annexin	ANXA2	38604	4	12.98	1	1467.91	1	4978.31	3	34263.7	3	49240.3	1	9103.15	1	10634.2	1	11292.3
H0YKA3_HUMAN	Zinc fingers and homeoboxes protein 2 (Fragment)	ZHX2	18755	1	4.82							1	114323
OTUD4_HUMAN	OTU domain-containing protein 4	OTUD4	124045	10	11.04	1	2138.48			10	109833
B4DJ30_HUMAN	cDNA FLJ61290, highly similar to Neutral alpha-glucosidase AB		112926	12	15.88							11	110563
GABT_HUMAN	4-aminobutyrate aminotransferase, mitochondrial	ABAT	56439	1	1.6					1	69372.4	1	39149.3
A0A024R462_HUMAN	Fibronectin	FN1	259211	18	9.94	8	18637.8	12	89339.3
A0A024R694_HUMAN	Alpha-actinin cytoskeletal isoform	ACTN1	103058	9	11.43							9	106409
A0A2R8Y4Y9_HUMAN	Ribonuclease H2 subunit B (Fragment)	RNASEH2B	10286	1	14.13											1	106257
A0A024R6P0_HUMAN	Serpin peptidase inhibitor, clade A (Alpha-1 antiproteinase, antitrypsin), member 3, isoform CRA_c	SERPINA3	47651	1	2.6	1	10273.9	1	14125.7	1	13955.3	1	12988.8	1	11663.8	1	13672.3	1	12428.3
A0A384MQX1_HUMAN	Epididymis secretory sperm binding protein		74139	7	12.2									5	39898.5	2	11284.3	1	35664.8
G3V1J0_HUMAN	WD repeat domain 55, isoform CRA_b	WDR55	24559	1	4.5					1	84584.5
A0A024R994_HUMAN	Copine III, isoform CRA_a	CPNE3	60131	4	7.26											1	4073.63	4	77313.9
A0A024R8V5_HUMAN	CDP-diacylglycerol--glycerol-3-phosphate 3-phosphatidyltransferase	hCG_1642326	62730	1	1.62			1	81353.8
A0A384MDP3_HUMAN	Epididymis secretory sperm binding protein		108579	3	2.94					3	75538.2
A0A286YEY4_HUMAN	Immunoglobulin heavy constant gamma 2 (Fragment)	IGHG2	43806	1	2.28													1	75412.9
P3H1_HUMAN	Prolyl 3-hydroxylase 1	P3H1	83394	5	7.74							5	74933.6
A0A024RD80_HUMAN	Heat shock protein 90kDa alpha (Cytosolic), class B member 1, isoform CRA_a	HSP90AB1	83264	8	11.46							5	73270.8
F2Z2U4_HUMAN	Transformation/transcription domain-associated protein	TRRAP	436138	1	0.21			1	70855.4
PARP4_HUMAN	Protein mono-ADP-ribosyltransferase PARP4	PARP4	192595	9	6.55			9	69611.9
A0A087X0Q4_HUMAN	Immunoglobulin kappa variable 2-40	IGKV2-40	11434	1	12.5											1	68636.4
B4DQF8_HUMAN	Lysyl oxidase homolog		42437	1	1.86											1	15295	1	50290.9
A0A024R1W3_HUMAN	Peptidylprolyl isomerase	FKBP10	64245	5	8.42									4	61972.2
F8VUF6_HUMAN	Decorin (Fragment)	DCN	20088	1	6.18							1	58929.6
C9JFA7_HUMAN	Glycerol-3-phosphate dehydrogenase 1-like protein (Fragment)	GPD1L	15982	1	4.86											1	55380.3
HS90A_HUMAN	Heat shock protein HSP 90-alpha	HSP90AA1	84660	6	9.97							4	53853
A0A286YF22_HUMAN	D-3-phosphoglycerate dehydrogenase	PHGDH	55939	4	7.98													3	53736
CO1A1_HUMAN	Collagen alpha-1(I) chain	COL1A1	138941	6	5.12			6	45158.7	3	8404.88
A0A0N9HU02_HUMAN	PTCHD1 isoform		62468	1	1.29									1	51607.3
A0A024RBH2_HUMAN	Cytoskeleton-associated protein 4, isoform CRA_c	CKAP4	66022	6	13.62									6	51546.1
B7ZKY6_HUMAN	Atriopeptidase	MME	85513	6	8.93							5	48391.5
B3VL17_HUMAN	Beta globin (Fragment)		11482	1	9.52	1	12199.9							1	35836.6
K7EPT8_HUMAN	Glial fibrillary acidic protein (Fragment)	GFAP	8376	1	14.67											1	47379.4
A0A5C2GJV1_HUMAN	IG c338_heavy_IGHV3-30_IGHD1-14_IGHJ4 (Fragment)		14318	1	10			1	46662.4
ACADV_HUMAN	Very long-chain specific acyl-CoA dehydrogenase, mitochondrial	ACADVL	70390	2	4.12											2	44452.2
A0A024R7F1_HUMAN	Glucosidase 2 subunit beta	PRKCSH	59296	3	3.42									2	42073.3
A0A087WVQ9_HUMAN	Elongation factor 1-alpha 1	EEF1A1	47883	7	13.61			1	21906.5									1	17512
FLNC_HUMAN	Filamin-C	FLNC	291022	13	6.31	12	26592.8	5	9144.23
A0A087X0S5_HUMAN	Collagen alpha-1(VI) chain	COL6A1	108339	4	4.78					4	26607.7	1	8001.89
H7C3J6_HUMAN	Sterile alpha motif domain-containing protein 11 (Fragment)	SAMD11	57240	1	1.29													1	33202.8
B3KNK5_HUMAN	cDNA FLJ14795 fis, clone NT2RP4001219, highly similar to Homo sapiens DnaJ (Hsp40) homolog, subfamily C, member 10 (DNAJC10), mRNA		68965	3	5.31							3	32929.2
MOES_HUMAN	Moesin	MSN	67820	3	4.51									3	32830.3
A0A024R972_HUMAN	Laminin, gamma 1 (Formerly LAMB2), isoform CRA_a	LAMC1	174012	8	7.44			8	32788.6
A0A087WUZ3_HUMAN	Spectrin beta chain	SPTBN1	274829	15	7.23	7	10535.9	10	21737.6
A0A087WW77_HUMAN	Lethal(2) giant larvae protein homolog 1	LLGL1	114427	1	0.95					1	29369.6
Q53HU0_HUMAN	CCT-theta (Fragment)		59651	4	7.85													3	27213.5
A0A5C2GAH8_HUMAN	IGH c293_heavy_IGHV1-18_IGHD4-17_IGHJ4 (Fragment)		13120	1	11.86													1	26832.4
A0A024RDL1_HUMAN	Chaperonin containing TCP1, subunit 6A (Zeta 1), isoform CRA_a	CCT6A	58024	3	6.4											1	8451.74	2	18027.1
Q9H7M3_HUMAN	FLJ00047 protein (Fragment)	FLJ00047	9327	1	9.88					1	26392.2
GT251_HUMAN	Procollagen galactosyltransferase 1	COLGALT1	71636	3	3.86									3	25388
A0A024RDH2_HUMAN	Ubiquitin-conjugating enzyme E2D 3 (UBC4/5 homolog, yeast), isoform CRA_a	UBE2D3	16687	1	5.44							1	25019.1
A8K6Q8_HUMAN	Transferrin receptor protein 1		84873	5	8.95							5	22059.2
B0QZ18_HUMAN	Copine-1	CPNE1	59718	2	3.32											2	20002.9	1	1720.55
A0A5K1VW56_HUMAN	ATPase family AAA domain-containing protein 3B	ATAD3B	32549	1	2.68									1	13513.2	1	8138.66
DPP2_HUMAN	Dipeptidyl peptidase 2	DPP7	54341	2	4.88													2	21467.1
ST38L_HUMAN	Serine/threonine-protein kinase 38-like	STK38L	54003	3	7.11													2	20741.9
A0A248RGE3_HUMAN	40S ribosomal protein S27a (Fragment)		16717	3	26.21	1	18718.4
A0A4D5RAB7_HUMAN	Annexin		33181	4	15.49							1	1107.69	1	2721.73	2	13825.2
A0A384MEK5_HUMAN	Epididymis secretory sperm binding protein		57825	2	5.64							2	17385.6
H7C147_HUMAN	Gasdermin-E (Fragment)	GSDME	20900	1	7.29													1	17132
A0A024R3E3_HUMAN	Apolipoprotein A-I, isoform CRA_a	APOA1	30778	2	8.61			1	4682.16	1	2834.69			1	2992.39	1	2918.78	1	2954.88
D3DTX7_HUMAN	Collagen, type I, alpha 1, isoform CRA_a	COL1A1	84740	5	7.68					1	11344.8	1	4101.73
B7Z4R3_HUMAN	CCT-beta		50944	2	5.06											1	3711.9	2	11430.1
B3KW35_HUMAN	cDNA FLJ42073 fis, clone SYNOV2014400, weakly similar to FIBULIN-1, ISOFORM C		21662	1	3.52													1	14504.6
A8KA82_HUMAN	DnaJ (Hsp40) homolog, subfamily C, member 3	DNAJC3	57580	1	1.98													1	14042.8
Q53EP4_HUMAN	Dolichyl-diphosphooligosaccharide--protein glycosyltransferase subunit 1 (Fragment)		68579	3	5.6									3	13720.8
B7Z6T9_HUMAN	cDNA FLJ50237, highly similar to Homo sapiens fibulin 2 (FBLN2), transcript variant 1, mRNA		57567	1	3.45					1	8782.33	1	1744.13			1	2706.73
A6NLG9_HUMAN	Biglycan		34876	1	3.58					1	13157.5
H0YAU4_HUMAN	Protein KIBRA (Fragment)	WWC1	50569	1	2.93											1	13143.5
A0A0J9YWF7_HUMAN	Alpha-aminoadipic semialdehyde dehydrogenase	ALDH7A1	32085	1	4.76													1	12651.1
A0A2X0SFJ0_HUMAN	Non-specific serine/threonine protein kinase (Fragment)	TRIO	341825	1	0.59									1	12468.8
A0A384MTJ7_HUMAN	Epididymis secretory sperm binding protein		57249	2	3.48													1	12409.3
B0QZK4_HUMAN	Heterochromatin protein 1-binding protein 3 (Fragment)	HP1BP3	28515	1	4.35									1	12279.3
ANX11_HUMAN	Annexin A11	ANXA11	54390	1	2.18													1	12224.7
A0A1C7CYX9_HUMAN	Dihydropyrimidinase-related protein 2	DPYSL2	73503	1	1.03											1	11512.5
A0A1W2PNV9_HUMAN	6-phosphofructo-2-kinase/fructose-2,6-bisphosphatase 3 (Fragment)	PFKFB3	14103	1	8.2													1	11354.2
A0A087WU08_HUMAN	Haptoglobin	HP	31408	1	4.27											1	11232.7
A8K3C3_HUMAN	T-complex protein 1 subunit delta		57952	2	4.64											1	11115.5
A0A384N6C2_HUMAN	Inosine-5'-monophosphate dehydrogenase	IMPDH	55805	1	2.14													1	10872.3
B4DDU6_HUMAN	cDNA FLJ50442, highly similar to T-complex protein 1 subunit epsilon		55421	3	7.95											2	10417.1
A0A1S5UZ07_HUMAN	Talin-1	TLN1	271420	5	2.89	4	4867.85	3	5112.34
A0A0G2JIW1_HUMAN	Heat shock 70 kDa protein 1B	HSPA1B	70109	5	10.59									1	9749.69
MARCS_HUMAN	Myristoylated alanine-rich C-kinase substrate	MARCKS	31555	2	10.24											2	9517.32
A0A494C1M4_HUMAN	10-formyltetrahydrofolate dehydrogenase	ALDH1L2	102850	3	4.08							3	9386.81
B3KNN7_HUMAN	cDNA FLJ30049 fis, clone ADRGL1000033, highly similar to 26S proteasome non-ATPase regulatory subunit 3		57232	3	8.23											2	9356.77
PLEC_HUMAN	Plectin	PLEC	531791	19	4.48	14	7307.89	2	976.375	1	1031.98
A0A024R713_HUMAN	Dihydrolipoyl dehydrogenase	DLD	54177	1	1.96													1	9120.18
RICTR_HUMAN	Rapamycin-insensitive companion of mTOR	RICTOR	192218	1	0.76											1	3509.17	1	5593.32
B5BUB5_HUMAN	Autoantigen La (Fragment)	SSB	46867	1	1.72													1	8997.12
K7EK06_HUMAN	Phenylalanine--tRNA ligase alpha subunit (Fragment)	FARSA	18389	1	6.55											1	4683.27	1	3776.64
A0A140VK14_HUMAN	Glutamate dehydrogenase (NAD(P)(+))		61434	1	1.43													1	8131.32
G3XAI2_HUMAN	Laminin subunit beta-1	LAMB1	200478	3	2.04			2	7982.58
M0QYD2_HUMAN	Anoctamin	ANO8	65628	1	1.2			1	7670.5
B7Z5H9_HUMAN	Acid beta-galactosidase		60552	1	2.56											1	7585.04
A0A494C0U1_HUMAN	Tripeptidyl-peptidase 2 (Fragment)	TPP2	130361	1	0.85					1	7400.62
A0A024RAB6_HUMAN	Heparan sulfate proteoglycan 2 (Perlecan), isoform CRA_b	HSPG2	464017	6	1.7	6	6993.84
A0A024R321_HUMAN	Filamin B, beta (Actin binding protein 278), isoform CRA_a	FLNB	280490	8	3.43	5	5471.75	1	1378.8
A0A024RB99_HUMAN	Serine hydroxymethyltransferase	SHMT2	53455	1	2.28													1	6841.05
A0A024R889_HUMAN	Spectrin, alpha, non-erythrocytic 1 (Alpha-fodrin), isoform CRA_g	SPTAN1	282250	7	3.18	7	6648.7
B2R5M9_HUMAN	Procollagen-lysine 5-dioxygenase		83504	2	3.71							2	6421.77
B3KX11_HUMAN	T-complex protein 1 subunit gamma		57946	1	2.11											1	6405.61
A0A024R0S6_HUMAN	EH-domain containing 2, isoform CRA_a	EHD2	61161	1	1.66											1	6114.13
A0A024RAQ4_HUMAN	Proline-rich protein HaeIII subfamily 1, isoform CRA_b	PRH1	25793	1	6.15					1	6101.46
1433T_HUMAN	14-3-3 protein theta	YWHAQ	27764	1	9.39					1	5774.39
A0A0S2Z3S0_HUMAN	Glycerol-3-phosphate dehydrogenase (Fragment)	GPD2	26745	1	3.6									1	5754.05
TERA_HUMAN	Transitional endoplasmic reticulum ATPase	VCP	89322	3	4.71							2	5496.03
A6NCT7_HUMAN	Collagen alpha-1(XVI) chain	COL16A1	96793	1	1.97			1	5347.85
B4DKR1_HUMAN	MICOS complex subunit MIC60		82516	2	4.29							2	5231.05
A0A024R9B8_HUMAN	Carboxypeptidase Q	PGCP	51888	1	2.33													1	5115.54
ERO1A_HUMAN	ERO1-like protein alpha	ERO1A	54393	1	2.56													1	5054.62
A0A2R8Y438_HUMAN	Ankyrin repeat domain-containing protein 11 (Fragment)	ANKRD11	108392	1	1.06									1	4908.08
A8K132_HUMAN	Glutaminase		73509	1	3.14													1	4866.12
LOXL2_HUMAN	Lysyl oxidase homolog 2	LOXL2	86725	2	3.62							1	4857.91
E5KNY5_HUMAN	Leucine-rich PPR-motif containing	LRPPRC	157905	5	3.95					3	4837.32
LAMB2_HUMAN	Laminin subunit beta-2	LAMB2	195981	3	2.06			1	4836.34
B7Z661_HUMAN	cDNA FLJ54658, highly similar to Limbic system-associated membrane protein		39714	1	3.07											1	4794.01
MYOF_HUMAN	Myoferlin	MYOF	234709	4	2.38					1	1345.09			2	3302.08
B2RMS9_HUMAN	Inter-alpha (Globulin) inhibitor H4 (Plasma Kallikrein-sensitive glycoprotein)	ITIH4	103362	2	2.26	1	868.945	1	1077.4	1	643.852			1	507.409			2	1530.19
A0A024R6I7_HUMAN	Alpha-1-antitrypsin	SERPINA1	46708	1	5.74	1	4394.54
P3H3_HUMAN	Prolyl 3-hydroxylase 3	P3H3	81837	1	1.77							1	4348.67
A0A024R228_HUMAN	Heterogeneous nuclear ribonucleoprotein K	HNRPK	51219	2	6.26													1	4287.68
Q9NQ82_HUMAN	Uridine diphospho-glucose dehydrogenase (Fragment)	GDH	16599	1	6.25													1	4232.24
A0A024R451_HUMAN	Serpin peptidase inhibitor, clade E (Nexin, plasminogen activator inhibitor type 1), member 2, isoform CRA_a	SERPINE2	44002	1	2.51													1	4153.24
A0A140VJW5_HUMAN	Aspartate--tRNA ligase, cytoplasmic		57136	1	1.8													1	3896.44
MDN1_HUMAN	Midasin	MDN1	632820	1	0.13									1	3865.52
4F2_HUMAN	4F2 cell-surface antigen heavy chain	SLC3A2	67994	1	2.22									1	3663.79
A8K479_HUMAN	cDNA FLJ77094, highly similar to Homo sapiens apolipoprotein B (including Ag(x) antigen) (APOB), mRNA (Fragment)		123826	2	2.34	1	3651.19
A0A0A0MSX9_HUMAN	Isoleucyl-tRNA synthetase	IARS1	142288	1	0.64					1	3628.28
Q60FE5_HUMAN	Filamin-A	FLNA	278226	50	26.37	1	3582.89
A0A0S2Z430_HUMAN	Phosphoenolpyruvate carboxykinase (GTP) (Fragment)	PCK2	70730	1	1.88									1	3513
A0A1B0GVU9_HUMAN	Glutaminyl-tRNA synthetase (Fragment)	QARS1	83783	1	1.22							1	3446.47
A0A024R6K8_HUMAN	T1-TrpRS	WARS	53165	2	4.46													1	3414.45
B4DXW6_HUMAN	Arginine--tRNA ligase		52291	2	5.29									2	3112.16
A0A024R5V1_HUMAN	Non-specific serine/threonine protein kinase	TRPM7	212697	1	0.59			1	3101.99
A1KY36_HUMAN	Cell proliferation-inducing protein 41		73453	1	1.34							1	2984.49
A0A024R732_HUMAN	Syntrophin, beta 2 (Dystrophin-associated protein A1, 59kDa, basic component 2), isoform CRA_a	SNTB2	57950	1	1.67											1	1330.44	1	1527.05
A0A087WVC1_HUMAN	RNA helicase	DDX50	82227	1	1.1											1	2831.24
A0A087WVM4_HUMAN	Formyltetrahydrofolate synthetase	MTHFD1L	99312	1	1.1							1	2513.69
F8WAM2_HUMAN	T-complex protein 1 subunit eta (Fragment)	CCT7	10494	1	22.45											1	2370.09
A0A024R3C4_HUMAN	KDEL (Lys-Asp-Glu-Leu) containing 2, isoform CRA_a	KDELC2	58572	1	1.78											1	2255.9
B2R8I2_HUMAN	cDNA, FLJ93914, highly similar to Homo sapiens histidine-rich glycoprotein (HRG), mRNA		59512	2	4.38							1	1566.38					1	659.128
A0A024R1N4_HUMAN	ATP-dependent DNA helicase 2 subunit 1	XRCC6	69843	1	1.81									1	2187.96
PPCEL_HUMAN	Prolyl endopeptidase-like	PREPL	83927	1	1.24													1	2178.17
A0A0A0MQS9_HUMAN	Laminin subunit alpha-4	LAMA4	202568	1	0.88			1	2109.89
A0A3B3IS01_HUMAN	Aspartate--tRNA ligase, mitochondrial	DARS2	61620	1	1.67									1	2097.57
B4DM22_HUMAN	26S proteasome non-ATPase regulatory subunit 2		99314	3	5.89							2	2090.86
B2RBR9_HUMAN	cDNA, FLJ95650, highly similar to Homo sapiens karyopherin (importin) beta 1 (KPNB1), mRNA		97184	2	2.74							1	2065.71
A0A090N8P3_HUMAN	Peptidylprolyl isomerase	FKBP9	63057	1	2.98									1	2053.36
A0A140VJR2_HUMAN	Testicular tissue protein Li 138		54548	1	2.03													1	1884.72
A0A384NL00_HUMAN	Glucose-6-phosphate 1-dehydrogenase		59257	2	3.5													1	1844.75
DYHC1_HUMAN	Cytoplasmic dynein 1 heavy chain 1	DYNC1H1	532408	3	0.54	3	1628.55
A8K492_HUMAN	Methionine--tRNA ligase, cytoplasmic		101144	1	1.22							1	1622.09
A0A384MDR6_HUMAN	Epididymis secretory sperm binding protein		91918	1	1.43							1	1608.48
A0A348GSH7_HUMAN	Serpin peptidase inhibitor clade G member 1	SERPING1	49757	1	2.68	1	1455.7
A0A024QZK7_HUMAN	Hexokinase	HK1	102738	1	1.52							1	1357.98
DCTN1_HUMAN	Dynactin subunit 1	DCTN1	141695	1	0.94					1	1262.95
B4DVG5_HUMAN	cDNA FLJ53214, highly similar to Tubulointerstitial nephritis antigen-like		44073	1	2.28													1	1254.73
AAAT_HUMAN	Neutral amino acid transporter B(0)	SLC1A5	56598	1	2.4											1	1165.77
F8VPD4_HUMAN	Aspartate carbamoyltransferase	CAD	236023	1	0.56	1	273.305	1	777.623
A8KAK1_HUMAN	cDNA FLJ77398, highly similar to Homo sapiens UDP-glucose ceramide glucosyltransferase-like 1, transcript variant 2, mRNA		175007	1	1.57					1	937.738
CKAP5_HUMAN	Cytoskeleton-associated protein 5	CKAP5	225495	1	0.69			1	884.822
HEMO_HUMAN	Hemopexin	HPX	51676	1	3.25	1	874.038
A0A087X080_HUMAN	Ryanodine receptor 3	RYR3	552465	1	0.29									1	825.7
A0A0G2JL54_HUMAN	C4a anaphylatoxin	C4B_2	187716	1	0.77	1	801.606
AHNK_HUMAN	Neuroblast differentiation-associated protein AHNAK	AHNAK	629101	1	1.22			1	797.166
LRP1_HUMAN	Prolow-density lipoprotein receptor-related protein 1	LRP1	504606	2	0.46	2	789.959
A0A024RC65_HUMAN	HCG1991735, isoform CRA_a	hCG_1991735	189252	1	1.09			1	581.903
B2RE46_HUMAN	Dolichyl-diphosphooligosaccharide--protein glycosyltransferase subunit 2		69334	1	1.9											1	566.794
Q504U6_HUMAN	TPR protein (Fragment)	TPR	79972	1	1.45			1	540.117
A0A024R9A4_HUMAN	RNA helicase	DDX3Y	73154	2	3.33									1	482.055
B2R7C2_HUMAN	cDNA, FLJ93375, highly similar to Homo sapiens ZW10, kinetochore associated, homolog (Drosophila) (ZW10), mRNA		88840	1	1.67							1	477.381
B4E0S6_HUMAN	RNA helicase		89547	2	2.68							1	398.122
PXDN_HUMAN	Peroxidasin homolog	PXDN	165275	2	1.49
G6PE_HUMAN	GDH/6PGL endoplasmic bifunctional protein	H6PD	88893	1	2.02
B4DP50_HUMAN	Prolyl-tRNA synthetase		54143	1	2.31
B3KML9_HUMAN	Delta-tubulin		44602	13	30.48
B2R8Z8_HUMAN	cDNA, FLJ94136, highly similar to Homo sapiens synaptotagmin binding, cytoplasmic RNA interacting protein (SYNCRIP), mRNA		69602	1	2.09
A0A0S2Z3G9_HUMAN	Actinin alpha 4 isoform 1 (Fragment)	ACTN4	104854	8	9.77
A0A087WTA8_HUMAN	Collagen alpha-2(I) chain	COL1A2	129151	1	1.32
A0A075B710_HUMAN	T cell receptor alpha joining 39 (Fragment)	TRAJ39	2202	1	95.24
A0A024R6A5_HUMAN	Protein-serine/threonine phosphatase	PPM1A	42448	1	3.14

## Sheet: FIP1-data
accession	protein name	gene name	molecular weight	identified peptides	coverage	FIP1-Band1		FIP1-Band2		FIP1-Band3		FIP1-Band4		FIP1-Band5		FIP1-Band6		FIP1-Band7
						quantified peptides count	iBAQ	quantified peptides count	iBAQ	quantified peptides count	iBAQ	quantified peptides count	iBAQ	quantified peptides count	iBAQ	quantified peptides count	iBAQ	quantified peptides count	iBAQ
TGME49_230230-t26_1-p1	hypothetical protein	TGME49_230230	29857	15	42.14	7	4.67602e+06	9	4.45891e+06	9	3.86312e+06	13	39707672	12	21182612	10	7.55825e+06	13	3.27823e+07
TGME49_283740-t26_1-p1	RNA recognition motif-containing protein	TGME49_283740	64433	12	16.75	11	872864	10	1.04341e+06	5	86711.8	5	76229.2	8	121091	1	2748.14	1	3944.74
TGME49_201200-t26_1-p1	zinc finger (CCCH type) motif-containing protein	TGME49_201200	68065	14	23.28	11	1.19677e+06	11	425372	4	26360	3	64393.8	2	23831.1
TGME49_294700-t26_1-p1	polynucleotide 5'-hydroxyl-kinase	TGME49_294700	73663	23	40.84	17	767633	20	813658			5	19151.2	4	11282.7	1	1290.36	2	45198.1
TGME49_230010-t26_1-p1	hypothetical protein	TGME49_230010	140376	20	16.6	20	685973	3	8144.63
TGME49_268250-t26_1-p1	WD domain, G-beta repeat-containing protein	TGME49_268250	59896	8	22.3	4	143828	6	71297.4	8	370449
TGME49_285200-t26_1-p1	cleavage and polyadenylation specifity factor protein	TGME49_285200	116743	17	19.38	15	307395	1	5932.61	1	15962.7			1	3402.41	2	4319.92
TGME49_254210-t26_1-p1	RNA recognition motif-containing protein	TGME49_254210	114336	8	11.93	8	156164	2	10131
TGME49_219440-t26_1-p1	hypothetical protein	TGME49_219440	181402	15	12.95	14	78141.9	2	1525.06	1	311.733
TGME49_247330-t26_1-p1	hypothetical protein	TGME49_247330	204455	12	8.09	5	16472.1	1	1388.76	8	19379.8			2	552.43	2	2088.42
TGME49_224280-t26_1-p1	CPSF A subunit region protein	TGME49_224280	301891	12	6.01	12	23716.5	1	480.903
TGME49_261960-t26_1-p1	hypothetical protein	TGME49_261960	129369	5	6.13	4	22942.5
TGME49_311720-t26_1-p1	chaperonin protein BiP	TGME49_311720	73253	39	46.56	19	889723	38	1.27903e+07	3	19389.4
TGME49_286420-t26_1-p1	elongation factor 1-alpha (EF-1-ALPHA), putative	TGME49_286420	49006	34	63.39	16	833058	15	596330	32	9.96303e+06	4	29856.6	2	13985.3
TGME49_273760-t26_1-p1	heat shock protein HSP70	TGME49_273760	72880	41	50.45	27	3.02694e+06	33	6.22722e+06
TGME49_289690-t26_1-p1	glyceraldehyde-3-phosphate dehydrogenase GAPDH1	TGME49_289690	53339	19	39.47	9	628801	7	321470	8	286420	18	4.34457e+06	9	1.06188e+06
TGME49_217890-t26_1-p1	alkyl hydroperoxide reductase/ Thiol specific antioxidant/ Mal allergen, putative	TGME49_217890	21722	19	69.39	3	82492.9	4	122326	4	118037	19	6.17935e+06	3	35043.4			4	79572.4
TGME49_232350-t26_1-p1	lactate dehydrogenase LDH1	TGME49_232350	35548	28	70.21	7	547576	5	281682	4	127335	9	314089	24	3.92596e+06
TGME49_308090-t26_1-p1	rhoptry protein ROP5	TGME49_308090	61102	16	28.23	2	43977.1	4	76209.4	15	4.42084e+06			1	3390.05
TGME49_293690-t26_1-p1	profilin PRF	TGME49_293690	17741	8	70.3	4	296183	3	217182	2	149489	1	19967.7	2	57916.5	2	50094.9	8	3.2103e+06
TGME49_227620-t26_1-p1	dense granule protein GRA2	TGME49_227620	19804	6	33.51							2	91268.8	1	163254	6	3.21803e+06	2	153924
TGME49_262670-t26_1-p1	ribosomal protein RPL18A	TGME49_262670	21330	13	50.82			1	15219.9					1	26403.4	2	24292.6	13	2.87824e+06
TGME49_232940-t26_1-p1	heat shock protein HSP20	TGME49_232940	20266	10	41.08											2	16159.7	9	2.23036e+06
TGME49_286720-t26_1-p1	heat shock protein HSP28	TGME49_286720	31094	23	75	1	6238	1	4341.12			8	276835	19	1.94903e+06
TGME49_320050-t26_1-p1	ribosomal protein RPL5	TGME49_320050	35342	18	49.68							7	350535	16	1.86975e+06
TGME49_211680-t26_1-p1	protein disulfide isomerase	TGME49_211680	52802	27	50.96	9	271405	5	68798.7	23	1.77367e+06
TGME49_247550-t26_1-p1	heat shock protein HSP60	TGME49_247550	60914	24	40.7	21	1.73545e+06	14	373609
TGME49_203310-t26_1-p1	dense granule protein GRA7	TGME49_203310	25919	14	47.03											11	2.03734e+06	1	6214.71
TGME49_233460-t26_1-p1	SAG-related sequence SRS29B	TGME49_233460	34732	12	40.48	3	108889	1	6524.21	1	42070	2	21240.2	3	40200.7	10	1.75531e+06
TGME49_292130-t26_1-p1	ribosomal protein RPL13A	TGME49_292130	32749	13	34.27							1	8220.73	1	8170.56			13	1.94743e+06
TGME49_247510-t26_1-p1	fructose-bisphospatase II	TGME49_247510	42397	16	43.04	1	20112.2	1	12206.2			16	1.91737e+06
TGME49_254720-t26_1-p1	dense granule protein GRA8	TGME49_254720	28628	4	12.27							3	380319	4	1462550
TGME49_316310-t26_1-p1	superoxide dismutase	TGME49_316310	22551	4	22.89													4	1.82363e+06
TGME49_261570-t26_1-p1	ribosomal protein RPL7A	TGME49_261570	31032	10	28.62	1	17172.4			1	26677.9	2	58679.3	9	1.65551e+06
TGME49_266060-t26_1-p1	ribosomal protein RPSA	TGME49_266060	31512	10	39.37	1	34622.7	2	48238.4			3	144683	10	1.43253e+06	3	62783.8
TGME49_239100-t26_1-p1	ribosomal protein RPS7	TGME49_239100	22588	10	66.33													10	1.43668e+06
TGME49_263050-t26_1-p1	ribosomal protein RPL13	TGME49_263050	39682	14	26.2	1	15139	1	14503.1	1	15870.4	2	25821.5	1	10220.4	14	1.25157e+06
TGME49_220400-t26_1-p1	actin depolymerizing factor ADF	TGME49_220400	12922	5	42.37	3	355469	2	252447	3	218685	2	117251	4	170143	3	140497	2	75806
TGME49_218260-t26_1-p1	histone H3.3	TGME49_218260	15413	1	5.15	1	116756	1	140414			1	150677	1	210682	1	166625	1	451462
TGME49_263090-t26_1-p1	14-3-3 protein	TGME49_263090	37174	14	42.11			2	54205.9	1	22877.7	4	45813.7	11	1.03771e+06
TGME49_297060-t26_1-p1	phosphoglycerate mutase PGMII	TGME49_297060	38160	15	31.86	1	11281	1	7948.85			1	5975.83	1	3199.11	14	1.09087e+06
TGME49_300000-t26_1-p1	ribosomal protein RPL18	TGME49_300000	21170	8	35.83	1	11026.1	1	3614.03	1	26698.5	1	14758.1	3	26829	2	28742.7	8	1.00329e+06
TGME49_218410-t26_1-p1	ribosomal protein RPP0	TGME49_218410	34158	14	34.39							4	95182.8	12	954545
TGME49_243730-t26_1-p1	rhoptry protein ROP9	TGME49_243730	37668	13	35.69							9	386518	5	117372	6	211871	6	304909
TGME49_216880-t26_1-p1	guanine nucleotide-binding protein	TGME49_216880	35147	14	40.19	1	11405.2					7	116938	13	794600
TGME49_284560-t26_1-p1	ribosomal protein RPL9	TGME49_284560	21424	5	38.42													5	887022
TGME49_237180-t26_1-p1	hypothetical protein	TGME49_237180	29155	12	34.12											11	865009
TGME49_220950-t26_1-p1	hypothetical protein	TGME49_220950	38556	4	13.77					4	845586
TGME49_227280-t26_1-p1	dense granule protein GRA3	TGME49_227280	23876	6	11.36											6	805225
TGME49_231850-t26_1-p1	serine-threonine phosophatase 2C (PP2C)	TGME49_231850	36791	14	24.47	2	8893.97	1	5487.66	2	8525.25	12	750524	3	11807
TGME49_251780-t26_1-p1	heat shock protein	TGME49_251780	78251	26	40.38	8	104634	21	674192
TGME49_214770-t26_1-p1	small GTP binding protein rab1a, putative	TGME49_214770	22880	7	38.12	1	10313.9					1	3372.13					7	685414
TGME49_232410-t26_1-p1	PDI family protein	TGME49_232410	24909	10	45													10	693727
TGME49_266640-t26_1-p1	Acetyl-coenzyme A synthetase 2, putative	TGME49_266640	79991	22	36.55	15	242221	18	418260
TGME49_289680-t26_1-p1	Ras-related protein Rab11	TGME49_289680	24996	8	45.66													8	658178
TGME49_209030-t26_1-p1	actin ACT1	TGME49_209030	41908	9	27.13	6	386064	6	97045.9	6	121263	2	13261.8	2	23831.4
TGME49_288360-t26_1-p1	tryptophanyl-tRNA synthetase (TrpRS2)	TGME49_288360	77058	20	34.54	7	192296	18	439046
TGME49_299050-t26_1-p1	ribosomal protein RPL17	TGME49_299050	22269	5	16.92	1	71493.9	2	93767.9	1	40527.2	1	35924.2	1	22971.3			5	364835
TGME49_248480-t26_1-p1	ribosomal protein RPS9	TGME49_248480	21684	8	39.36													7	587520
TGME49_232300-t26_1-p1	ribosomal protein RPS3	TGME49_232300	28737	11	34.51	2	33229.3	1	9710.25							11	540286
TGME49_238010-t26_1-p1	ribosomal protein RPL23A	TGME49_238010	18562	8	46.11													7	581327
TGME49_230410-t26_1-p1	peroxiredoxin PRX3	TGME49_230410	30534	9	36.75			1	21255.8	1	14447.9	6	468744	2	37521.4			3	35736.3
TGME49_294200-t26_1-p1	glucose-6-phosphate 1-dehydrogenase	TGME49_294200	62736	16	27.86					16	554862
TGME49_266960-t26_1-p1	beta tubulin	TGME49_266960	50073	17	32.07	4	99549.9	5	58726.1	15	366494
TGME49_310640-t26_1-p1	phosphorylase family protein	TGME49_310640	33043	10	41.91	3	70805.2	3	68515.5					9	383769
TGME49_245460-t26_1-p1	ribosomal protein RPS8	TGME49_245460	23561	8	46.83			1	8887.53	1	10661.5	2	16771.9	1	5668.49	7	365445	5	100034
TGME49_221620-t26_1-p1	beta-tubulin, putative	TGME49_221620	50037	16	30.07	8	132345	4	44931.9	14	326770
TGME49_205510-t26_1-p1	nucleolar protein 5, putative	TGME49_205510	54349	18	36.73					16	501378
TGME49_261950-t26_1-p1	ATP synthase beta subunit ATP-B	TGME49_261950	59917	13	28.21					13	482074
TGME49_226970-t26_1-p1	ribosomal protein RPS11	TGME49_226970	18677	5	29.19							1	12041.1			1	10845.8	5	432425
TGME49_203050-t26_1-p1	AP2 domain transcription factor AP2VIIa-6	TGME49_203050	257421	1	0.29							1	451747
TGME49_233140-t26_1-p1	deoxyuridine 5'-triphosphate nucleotidohydrolase, putative	TGME49_233140	18162	4	21.76							3	247022					4	200732
TGME49_244320-t26_1-p1	ribosomal protein RPL24	TGME49_244320	32693	8	22.68													8	443264
TGME49_251540-t26_1-p1	dense granule protein GRA9	TGME49_251540	35338	4	14.78							2	107041	4	335922
TGME49_311430-t26_1-p1	fibrillarin	TGME49_311430	31989	7	31.25							4	195532	6	246952
TGME49_219140-t26_1-p1	EF-1 guanine nucleotide exchange domain-containing protein	TGME49_219140	20734	5	36.36					1	11416.1	1	6927.19			5	402866
TGME49_275440-t26_1-p1	dense granule protein GRA6	TGME49_275440	23309	1	6.25											1	93059.8	1	326359
TGME49_245680-t26_1-p1	ribosomal protein RPL21	TGME49_245680	17894	4	28.03			1	53718	1	16127.1			1	43059.2	1	18612.3	3	275420
TGME49_294670-t26_1-p1	translation initiation factor 3 subunit	TGME49_294670	31813	8	48.01	2	35332.2	1	12581.1			3	62682.2	7	286589
TGME49_256760-t26_1-p1	pyruvate kinase PyK1	TGME49_256760	57530	13	23.54	6	138722	5	51220.1	12	189409
TGME49_290005-t26_1-p1	proteasome subunit beta type 1, putative	TGME49_290005	39916	6	20.61													6	372779
TGME49_316400-t26_1-p1	alpha tubulin TUBA1	TGME49_316400	50114	9	25.83	3	96035.2	2	49947.1	7	225505
TGME49_295125-t26_1-p1	rhoptry protein ROP4	TGME49_295125	42389	5	15.97	1	8433.2	1	6485.18	5	349198
TGME49_314260-t26_1-p1	hypothetical protein	TGME49_314260	23795	4	20.66													4	350322
TGME49_226960-t26_1-p1	phosphofructokinase PFKII	TGME49_226960	131362	20	18.2	19	348494
TGME49_315110-t26_1-p1	prefoldin, alpha subunit protein	TGME49_315110	19384	1	7.3													1	345477
TGME49_300140-t26_1-p1	elongation factor 1-gamma, putative	TGME49_300140	44040	5	9.9	5	262667	3	77725.9
TGME49_273460-t26_1-p1	eukaryotic translation initiation factor 3 subunit 6 interacting protein	TGME49_273460	75074	11	17.68	7	108862	10	231151
TGME49_221380-t26_1-p1	alba 1	TGME49_221380	27228	5	16.19									5	339386
TGME49_215470-t26_1-p1	ribosomal protein RPL10A	TGME49_215470	24603	6	25.81							1	13942.8			2	33874	5	285437
TGME49_290660-t26_1-p1	RNA recognition motif-containing protein	TGME49_290660	48395	5	11.21					5	332086
TGME49_247350-t26_1-p1	thioredoxin domain-containing protein	TGME49_247350	33676	6	15.06					1	48425							5	281221
TGME49_218820-t26_1-p1	alba 2	TGME49_218820	15392	4	32.43													3	325921
TGME49_313390-t26_1-p1	ribosomal protein RPL6	TGME49_313390	31222	9	32.98													9	325036
TGME49_264610-t26_1-p1	RNA recognition motif-containing protein	TGME49_264610	44974	6	16.28	1	2163.66	1	2584.17	6	292916	3	23319.8	1	916.553
TGME49_316330-t26_1-p1	superoxide dismutase SOD2	TGME49_316330	31463	5	19.86													5	319012
TGME49_205470-t26_1-p1	translation elongation factor 2 family protein, putative	TGME49_205470	106572	13	15.34	13	306892			3	11535.9
TGME49_270640-t26_1-p1	RNA recognition motif-containing protein	TGME49_270640	24547	3	17.79							1	5670.46			2	294284	1	12932.5
TGME49_214080-t26_1-p1	toxofilin	TGME49_214080	26789	3	13.99											3	309850
TGME49_261250-t26_1-p1	histone H2A1	TGME49_261250	19546	1	5							1	17418.8	1	26716.7	1	61140.3	1	203344
TGME49_249780-t26_1-p1	hypothetical protein	TGME49_249780	35575	7	33.54			1	15865.3			5	226333	3	50279			1	15640.8
TGME49_236540-t26_1-p1	RNA recognition motif-containing protein	TGME49_236540	53439	8	16.37					8	302619
TGME49_288380-t26_1-p1	heat shock protein HSP90	TGME49_288380	81933	12	19.77	12	294128	1	2897.12
TGME49_244560-t26_1-p1	heat shock protein 90, putative	TGME49_244560	96823	18	23.02	18	294990
TGME49_310030-t26_1-p1	cyclase-associated protein, putative	TGME49_310030	22484	4	16.75													4	289674
TGME49_283540-t26_1-p1	hypothetical protein	TGME49_283540	41946	7	18.35							3	43349.3	7	245158
TGME49_319920-t26_1-p1	2-oxo acid dehydrogenases acyltransferase (catalytic domain) domain-containing protein	TGME49_319920	70290	9	19.73	2	19473.4	3	15258.9	8	248852	1	1663.12	1	2002.03	1	598.415
TGME49_312270-t26_1-p1	rhoptry protein ROP13	TGME49_312270	44802	7	15.5									7	286351
TGME49_288720-t26_1-p1	ribosomal protein RPL10	TGME49_288720	24801	8	28.05	1	9786.39	1	7860.61	1	4001.99	2	11728.6	1	2150.95	1	1284.53	5	248924
TGME49_251500-t26_1-p1	eukaryotic initiation factor-3, subunit 3, putative	TGME49_251500	65714	9	14.33					9	277065
TGME49_300280-t26_1-p1	LSM domain-containing protein	TGME49_300280	17883	4	24.26													4	272933
TGME49_311240-t26_1-p1	DnaJ family chaperone, putative	TGME49_311240	47449	8	17.14	1	1545.05			7	269813
TGME49_257090-t26_1-p1	NAC domain-containing protein	TGME49_257090	38782	5	15.88											1	25133.4	5	242573
TGME49_237140-t26_1-p1	ethylene inducible protein, putative	TGME49_237140	32704	11	35.83	1	4720.46	1	4738.73	2	5333.36	1	4936.07	10	245276
TGME49_269840-t26_1-p1	proteasome regulatory subunit	TGME49_269840	35262	8	30.89							5	153232	6	110495
TGME49_265450-t26_1-p1	hexokinase	TGME49_265450	51498	7	18.8	2	31092.4	2	12636.9	7	216363
TGME49_295110-t26_1-p1	rhoptry protein ROP7	TGME49_295110	63395	6	13.22	1	6184.34	1	4755.8	4	249080
TGME49_270510-t26_1-p1	asparaginyl-tRNA synthetase (NOB+tRNA synthase)	TGME49_270510	75005	9	12.72	9	179982	3	34523.1	3	35160.6
TGME49_229140-t26_1-p1	MaoC family domain-containing protein	TGME49_229140	35939	7	23.46	1	8201.35	1	5876.86	1	5145.24	3	31524.8	6	196135
TGME49_248340-t26_1-p1	GTP-binding nuclear protein ran/tc4	TGME49_248340	25998	7	27.51							1	7533			7	214360	1	20946.6
TGME49_249180-t26_1-p1	bifunctional dihydrofolate reductase-thymidylate synthase	TGME49_249180	68752	11	22.79	5	92355.9	10	144801			2	4365.67
TGME49_205700-t26_1-p1	cyclophilin precursor	TGME49_205700	38197	8	25.86			2	43621.5	1	17553	1	2847.85	1	6368.89			6	170383
TGME49_250770-t26_1-p1	eukaryotic initiation factor-4A, putative	TGME49_250770	46673	3	9.22	2	103219	2	53067.2	2	78710.9
TGME49_291960-t26_1-p1	rhoptry kinase family protein ROP40 (incomplete catalytic triad)	TGME49_291960	57948	7	18.48	1	2603.57	1	1631.53	7	229986
TGME49_293340-t26_1-p1	ran binding family protein 1, putative	TGME49_293340	24292	6	25									5	233445
TGME49_280710-t26_1-p1	20S proteasome subunit beta 7, putative	TGME49_280710	30266	4	17.67					1	37761.8					4	194512
TGME49_262040-t26_1-p1	SAC3/GANP family protein	TGME49_262040	29694	9	32.71	1	1552.99									9	225346
TGME49_248880-t26_1-p1	GTPase RAB7	TGME49_248880	47713	4	10.42							1	1662.7					4	223077
TGME49_313190-t26_1-p1	Rab18/RabC-family small GTPase	TGME49_313190	23481	3	19.34	1	12032.9											3	211638
TGME49_259550-t26_1-p1	dihydropteroate synthase	TGME49_259550	82685	12	20.99	4	24252.5	11	199315
TGME49_228190-t26_1-p1	eukaryotic initiation factor-3, subunit 5, putative	TGME49_228190	38070	3	10.4	1	8389.42	1	5100.46			2	68214.4	2	124807			1	11880.9
TGME49_239500-t26_1-p1	proteasome subunit alpha type, putative	TGME49_239500	27937	5	16.67											5	215075
TGME49_229480-t26_1-p1	calcium binding protein precursor, putative	TGME49_229480	38291	5	11.64							3	32295.6	5	177509
TGME49_201780-t26_1-p1	microneme protein MIC2	TGME49_201780	82634	8	13.52	2	22892	7	186415
TGME49_238070-t26_1-p1	glutaredoxin domain-containing protein	TGME49_238070	26165	4	15.55											1	13336.1	4	195720
TGME49_211030-t26_1-p1	hypothetical protein	TGME49_211030	22216	6	31.94			1	4534.99							2	12331	6	190461
TGME49_293180-t26_1-p1	NADP-specific glutamate dehydrogenase	TGME49_293180	63799	10	18.86	4	35104.8	2	9787.41	8	159969
TGME49_236040-t26_1-p1	fructose-1,6-bisphosphate aldolase	TGME49_236040	46960	8	14.78	5	92257.9	2	27744.3	2	36742.1	4	45878.8
TGME49_240600-t26_1-p1	chaperonin cpn60, putative	TGME49_240600	72237	9	16.64	7	143188	5	53853
TGME49_299210-t26_1-p1	CTP synthase	TGME49_299210	70998	8	15.34	1	10279.5	8	184801
TGME49_203990-t26_1-p1	rhoptry protein ROP12	TGME49_203990	25483	2	14.83							2	178444	1	9107.75
TGME49_289530-t26_1-p1	ribosomal protein RPL19	TGME49_289530	22160	1	4.81			1	32931.2	1	40748.2	1	21883.6					1	91142.4
TGME49_219800-t26_1-p1	vacuolar ATP synthase subunit b, putative	TGME49_219800	56614	8	26.14	1	2552.52	1	2344.95	6	180516
TGME49_305290-t26_1-p1	vacuolar atp synthase subunit e, putative	TGME49_305290	39083	9	26.96											8	182995
TGME49_216650-t26_1-p1	S15 sporozoite-expressed protein	TGME49_216650	48988	5	15.14	2	53216.5	3	34054.8	1	2712.04	4	90312.5
TGME49_254900-t26_1-p1	proteasome subunit beta type 2, putative	TGME49_254900	22001	2	8.9													2	180101
TGME49_257680-t26_1-p1	myosin light chain MLC1	TGME49_257680	24124	4	19.72											4	178541
TGME49_289830-t26_1-p1	eukaryotic initiation factor-3, delta subunit, putative	TGME49_289830	37767	5	16.72	1	11731.5					3	91097.3	3	75603.5
TGME49_207770-t26_1-p1	PCI domain-containing protein	TGME49_207770	55463	7	17.03					7	174707
TGME49_248390-t26_1-p1	ribosomal protein RPL26	TGME49_248390	16309	5	24.11													5	172480
TGME49_317720-t26_1-p1	eukaryotic translation initiation factor 3 subunit 7, putative	TGME49_317720	68767	9	19.7			8	170834
TGME49_288860-t26_1-p1	RuvB family 2 protein	TGME49_288860	55446	9	19.69					8	166338
TGME49_268850-t26_1-p1	enolase 2	TGME49_268850	52114	6	20.21	6	72261	4	37597.7	3	54655
TGME49_258130-t26_1-p1	Rab1 protein	TGME49_258130	23872	2	12.04							1	3934.15					2	154413
TGME49_205558-t26_1-p1	NAC domain-containing protein	TGME49_205558	20507	6	36.51	2	35379.9	1	6053.74			1	4973.4			3	82866.5	4	28103.4
TGME49_321500-t26_1-p1	RNA recognition motif-containing protein	TGME49_321500	50938	8	17.05	1	16100.8	1	10733.8	1	15383.3	1	4811.35	3	51702.4	5	54596.9
TGME49_280380-t26_1-p1	poly(ADP-ribose) glycohydrolase	TGME49_280380	61837	6	10.67	1	9411.09			6	142661
TGME49_208030-t26_1-p1	microneme protein MIC4	TGME49_208030	63021	4	7.41					4	150697
TGME49_251690-t26_1-p1	seryl-tRNA synthetase, cytoplasmic, putative	TGME49_251690	54117	10	26.35	2	7167.46	1	5064.21	8	138390
TGME49_234505-t26_1-p1	phenylalanyl-tRNA synthetase alpha chain A, putative	TGME49_234505	59323	7	16.38					7	150322
TGME49_258870-t26_1-p1	hypothetical protein	TGME49_258870	101597	9	11.68	2	12797.3	7	56683.1	7	75324.9			1	1075.7
TGME49_309120-t26_1-p1	ribosomal protein RPL4	TGME49_309120	49258	6	14.29	5	93227.9	3	36319	1	16289.8
TGME49_232250-t26_1-p1	catalase	TGME49_232250	57298	4	11.55	3	80507.7	2	29943.5	3	33195.1
TGME49_225060-t26_1-p1	nucleoredoxin family protein	TGME49_225060	45226	5	12.98											5	142024
TGME49_210690-t26_1-p1	ribosomal protein RPS6	TGME49_210690	28956	2	11.72									2	141824
TGME49_288650-t26_1-p1	dense granule protein GRA12	TGME49_288650	47923	6	13.76							6	100459					1	39570.9
TGME49_305850-t26_1-p1	RNA recognition motif-containing protein	TGME49_305850	39168	8	24.46							8	136301			1	2524.88
TGME49_312050-t26_1-p1	small GTPase Rab2, putative	TGME49_312050	24209	5	28.5													4	138495
TGME49_286750-t26_1-p1	MA3 domain-containing protein	TGME49_286750	58969	8	20			1	3489.6	7	132429
TGME49_301440-t26_1-p1	calcium-dependent protein kinase CDPK1	TGME49_301440	65421	6	9.28					6	135754
TGME49_248810-t26_1-p1	nuclear factor NF7	TGME49_248810	54283	7	15.9	1	5568.97			6	129735
TGME49_300100-t26_1-p1	rhoptry neck protein RON2	TGME49_300100	166464	11	9.33	11	135228
TGME49_262620-t26_1-p1	RNA recognition motif-containing protein	TGME49_262620	31760	6	19.8	2	16931.9	2	14878.1					3	23210.4	5	72151.4	1	5542.18
TGME49_215775-t26_1-p1	rhoptry protein ROP8	TGME49_215775	65913	3	5.04					3	131056
TGME49_230160-t26_1-p1	hypothetical protein	TGME49_230160	15944	2	18.31													1	130605
TGME49_216860-t26_1-p1	DEAD (Asp-Glu-Ala-Asp) box polypeptide DDX39	TGME49_216860	49114	4	6.91	2	49551.1			3	79701.6
TGME49_215220-t26_1-p1	hypothetical protein	TGME49_215220	68630	7	26.07			7	129060
TGME49_242290-t26_1-p1	proteasome subunit alpha1, putative	TGME49_242290	28114	7	29.64											6	127861
TGME49_232230-t26_1-p1	ribosomal protein RPL30	TGME49_232230	11662	2	25.93	1	28124.9	2	43116	1	23626.4	1	13712.2	1	18167
TGME49_216450-t26_1-p1	peptidase, T1 family protein	TGME49_216450	27939	3	16.54											3	124484
TGME49_225930-t26_1-p1	triose-phosphate isomerase TPI-I	TGME49_225930	27890	7	29.25											7	124420
TGME49_310070-t26_1-p1	methyltransferase, putative	TGME49_310070	25336	5	22.77					1	1550.87					4	47198.2	4	73099.6
TGME49_318310-t26_1-p1	transketolase	TGME49_318310	76907	9	13.59	1	11362.5	8	108071
TGME49_225050-t26_1-p1	adenosylhomocysteinase, putative	TGME49_225050	64106	8	16.5	1	5384.94	2	5305.61	8	108590
TGME49_272910-t26_1-p1	T-complex protein 1 delta subunit	TGME49_272910	58644	7	13.84	6	55764.8			7	63096.2
TGME49_204020-t26_1-p1	ribosomal protein RPL8	TGME49_204020	28255	4	14.23	2	26445.1	1	14488.4			2	16040.6	3	39419.9	2	22212
TGME49_227600-t26_1-p1	ribosomal protein RPL34	TGME49_227600	15383	1	5.97									1	23704.4	1	15923.8	1	78920.3
TGME49_272290-t26_1-p1	pyruvate dehydrogenase complex subunit PD-HE1Beta	TGME49_272290	50016	3	7.87	1	12159.9					3	105620
TGME49_320480-t26_1-p1	Rab11b	TGME49_320480	24857	2	10.18													2	115058
TGME49_229990-t26_1-p1	T-complex protein 1 subunit alpha, putative	TGME49_229990	59216	7	15.88	3	31206.8	2	10147.9	7	73206.8
TGME49_201700-t26_1-p1	WD domain, G-beta repeat-containing protein	TGME49_201700	67437	4	9.02	2	15566.8	2	98642.5
TGME49_228470-t26_1-p1	ribosomal protein RPL15	TGME49_228470	24326	3	17.56											3	113789
TGME49_232710-t26_1-p1	ribosomal protein RPS3A	TGME49_232710	29371	5	19.31	3	38483.8	2	16133.9	2	13372.3	2	7276.98	2	34091.4	1	3189.11
TGME49_249590-t26_1-p1	proteasome subunit alpha type 5-2, putative	TGME49_249590	28279	5	25.58											4	109795
TGME49_225080-t26_1-p1	ribosomal protein RPS18	TGME49_225080	17723	5	33.33	1	8167.3					3	32118.4	3	51119.6	2	10524.3	1	6844.47
TGME49_297430-t26_1-p1	hypothetical protein	TGME49_297430	25337	2	4.84									1	68549.5	2	23926.2	2	16098.5
TGME49_263850-t26_1-p1	hypothetical protein	TGME49_263850	25122	6	33.19											6	107737
TGME49_233220-t26_1-p1	hypothetical protein	TGME49_233220	159704	18	13.75	17	76934.9	7	30104.4
TGME49_267400-t26_1-p1	ribosomal protein RPL32	TGME49_267400	15617	2	17.16							1	13830.6	1	18682	1	19352.8	1	53776.6
TGME49_318430-t26_1-p1	malate dehydrogenase MDH	TGME49_318430	54761	10	23.48	1	4804.9	1	2131.23	1	1315.2			9	95537.4
TGME49_259660-t26_1-p1	orotate phosphoribosyltransferase	TGME49_259660	31593	9	37.1									8	103391
TGME49_320740-t26_1-p1	hypothetical protein	TGME49_320740	36968	7	18.32											7	99830.2
TGME49_218920-t26_1-p1	proteasome subunit beta type, putative	TGME49_218920	33758	5	19.09													4	99792.6
TGME49_289600-t26_1-p1	heat shock protein HSP29	TGME49_289600	29649	3	12.5			1	11095.2	2	80866.4			1	7672.55
TGME49_234190-t26_1-p1	serine hydroxymethyltransferase 2, putative	TGME49_234190	65114	2	4.2	1	20698			2	77792.2
TGME49_251870-t26_1-p1	histone H2Bb	TGME49_251870	12575	3	33.04													2	97377.9
TGME49_286630-t26_1-p1	redoxin domain-containing protein	TGME49_286630	31107	3	14.38													3	96286.5
TGME49_214790-t26_1-p1	glycoprotein	TGME49_214790	31444	2	7.07													2	96158.5
TGME49_217740-t26_1-p1	3-ketoacyl-(acyl-carrier-protein) reductase	TGME49_217740	39040	5	15.43											5	95800.3
TGME49_261580-t26_1-p1	histone H2AX	TGME49_261580	14510	1	6.67											1	13858.1	1	79905.2
TGME49_223960-t26_1-p1	ubiquitin interaction motif family protein	TGME49_223960	41377	5	15.72			1	2055.03	4	87672.8							1	2800.52
TGME49_271810-t26_1-p1	lanp, putative	TGME49_271810	31931	5	20.49							5	91857.2
TGME49_218220-t26_1-p1	cell-cycle-associated protein kinase CDK, putative	TGME49_218220	34285	3	10	1	38972.1							2	52863.8
TGME49_258150-t26_1-p1	proteasome subunit alpha type 7, putative	TGME49_258150	27081	4	15.92											4	89457.4
TGME49_290670-t26_1-p1	leucyl aminopeptidase LAP	TGME49_290670	83237	9	11.4	5	53092.9	2	5850.27	5	29036.3
TGME49_204400-t26_1-p1	ATPase synthase subunit alpha, putative	TGME49_204400	62146	4	7.8					3	86594.4
TGME49_291890-t26_1-p1	microneme protein MIC1	TGME49_291890	48629	2	3.95					2	86365.3
TGME49_232600-t26_1-p1	phospholipase, patatin family protein	TGME49_232600	70811	4	5.71			4	85918.8
TGME49_279100-t26_1-p1	hypothetical protein	TGME49_279100	47694	3	9.66	1	14609.1	1	9427.26	3	60752.9
TGME49_269190-t26_1-p1	glyceraldehyde-3-phosphate dehydrogenase GAPDH2	TGME49_269190	105120	6	6.93	3	17187.9	1	3446.92			2	39454.3	4	24054.3
TGME49_254440-t26_1-p1	ribosomal protein RPL12	TGME49_254440	17821	1	9.09	1	22368.8			1	18808.1			1	18640.8			1	23992.2
TGME49_311090-t26_1-p1	ubiquitin carboxyl-terminal hydrolase	TGME49_311090	67167	4	8.9	1	3340.23	4	80171
TGME49_230450-t26_1-p1	bifunctional GMP synthase/glutamine amidotransferase protein	TGME49_230450	62295	5	10.19	5	77477.3	2	5789.02
TGME49_227360-t26_1-p1	ribosomal protein RPL3	TGME49_227360	44057	2	5.66	2	64248.3	1	11797.8	1	6957.31
TGME49_244110-t26_1-p1	nucleosome assembly protein (nap) protein	TGME49_244110	48587	5	15.47					5	82670.9
TGME49_270240-t26_1-p1	MAG1	TGME49_270240	49180	2	5.09	2	23573.9	1	6671.68	1	50767.5
TGME49_313400-t26_1-p1	DnaJ domain-containing protein	TGME49_313400	31966	5	22.87									5	80783.3
TGME49_277500-t26_1-p1	26S proteasome regulatory subunit 7, putative	TGME49_277500	52368	6	17.23	3	38658			5	41973.7
TGME49_312600-t26_1-p1	heat shock protein HSP21	TGME49_312600	21279	3	12.31													3	79493.2
TGME49_308840-t26_1-p1	SAG-related sequence SRS51	TGME49_308840	50086	3	7.2									1	2539.02	2	75003.5
TGME49_278050-t26_1-p1	proteasome subunit alpha type 1, putative	TGME49_278050	27241	4	22.27											3	51238	2	25471.7
TGME49_247460-t26_1-p1	proliferating cell nuclear antigen PCNA1	TGME49_247460	34552	4	15.46							3	49161.4	2	25874.2
TGME49_253430-t26_1-p1	asparagine synthetase, putative	TGME49_253430	65868	5	9.86	2	15394.5	1	4490.95	3	53469.1
TGME49_205250-t26_1-p1	rhoptry protein ROP18	TGME49_205250	62666	4	5.6	2	31750.8			3	41379.1
TGME49_239820-t26_1-p1	D-3-phosphoglycerate dehydrogenase	TGME49_239820	65194	5	7.62	5	68552.7	1	2615.53
TGME49_319560-t26_1-p1	microneme protein MIC3	TGME49_319560	40528	3	13.84			1	641.647	2	58264.5			2	10157
TGME49_290600-t26_1-p1	succinyl-CoA-synthetase alpha SCSA	TGME49_290600	35090	3	6.61									3	68973.1
TGME49_211250-t26_1-p1	hypothetical protein	TGME49_211250	28568	4	18.18											3	68812.7
TGME49_207930-t26_1-p1	phosphatidylethanolamine-binding protein	TGME49_207930	22600	3	17.87													3	68643.3
TGME49_305010-t26_1-p1	pre-mRNA branch site protein p14, putative	TGME49_305010	17216	3	25													3	65324.7
TGME49_209420-t26_1-p1	hypothetical protein	TGME49_209420	26853	1	4							1	21302.7	1	43978.3
TGME49_226250-t26_1-p1	DEAD (Asp-Glu-Ala-Asp) box polypeptide DDX3X	TGME49_226250	78593	6	9.26	2	22053.2	5	31726.6	2	11213.8
TGME49_308020-t26_1-p1	SAG-related sequence SRS57	TGME49_308020	41971	3	7.01									3	63798.3
TGME49_270250-t26_1-p1	dense granule protein GRA1	TGME49_270250	20225	1	6.32													1	63294.9
TGME49_228170-t26_1-p1	inner membrane complex protein IMC2A	TGME49_228170	170816	12	8.52	10	54388							2	7725.56
TGME49_290730-t26_1-p1	CS domain-containing protein	TGME49_290730	41901	2	5.26							2	60860.3
TGME49_215980-t26_1-p1	hypothetical protein	TGME49_215980	24466	1	4.76	1	13545.7					1	12803.9	1	15789.1			1	18435.2
TGME49_276930-t26_1-p1	hypothetical protein	TGME49_276930	21468	1	4.08													1	59966.2
TGME49_261210-t26_1-p1	26s proteasome subunit p55, putative	TGME49_261210	55050	3	6.39					3	59847
TGME49_233480-t26_1-p1	SAG-related sequence SRS29C	TGME49_233480	39119	2	6.45									2	59674.8
TGME49_262920-t26_1-p1	trypsin domain-containing protein	TGME49_262920	104525	6	7.61					6	57538.2							1	1654.08
TGME49_219590-t26_1-p1	RuvB family 1 protein	TGME49_219590	52950	4	10.16					4	58859.7
TGME49_218780-t26_1-p1	phosphoserine aminotransferase, putative	TGME49_218780	52755	3	9.36					3	58566.2
TGME49_311470-t26_1-p1	rhoptry neck protein RON5	TGME49_311470	187410	13	8.52	13	58561.9
TGME49_238050-t26_1-p1	nuclease and tudor domain-containing protein	TGME49_238050	104042	8	10.1	8	58341.5
TGME49_231630-t26_1-p1	alveolin domain containing intermediate filament IMC4	TGME49_231630	50172	4	10.18			1	9978.74	3	47865.1
TGME49_231640-t26_1-p1	alveolin domain containing intermediate filament IMC1	TGME49_231640	69596	1	2.13			1	56997.9
TGME49_222840-t26_1-p1	Ser/Thr phosphatase family protein	TGME49_222840	48158	1	2.31							1	24977.6	1	31992.1
TGME49_224900-t26_1-p1	adenylate kinase, putative	TGME49_224900	28561	3	14.01											3	56687.3
TGME49_257490-t26_1-p1	prefoldin subunit superfamily protein	TGME49_257490	33032	4	14.72											2	56270.2
TGME49_204050-t26_1-p1	subtilisin SUB1	TGME49_204050	81777	3	5.78	2	38202.2	3	17618.9
TGME49_266120-t26_1-p1	thioredoxin-dependent peroxidase TPX1/2	TGME49_266120	37219	4	13.81													4	55796.5
TGME49_288500-t26_1-p1	FAD Malate-dehydrogenase (MDH-FAD)	TGME49_288500	60381	5	12	3	13145.6			3	41136.6
TGME49_289650-t26_1-p1	PEP-carboxykinase I	TGME49_289650	75343	4	7.98	4	52574.5	1	1494.6
TGME49_270380-t26_1-p1	ribosomal protein RPS13	TGME49_270380	17176	1	4.64													1	53938.6
TGME49_267740-t26_1-p1	hypothetical protein	TGME49_267740	37033	1	4.12									1	52476.4
TGME49_305520-t26_1-p1	ribosomal protein RPS2	TGME49_305520	29336	1	4.46	1	10364.9	1	10442.9	1	10543.5	1	5896.57	1	6747.73	1	7883.86
TGME49_278830-t26_1-p1	glucose-6-phosphate 1-dehydrogenase	TGME49_278830	98280	6	7.52	6	51771.8
TGME49_247220-t26_1-p1	nudix -type motif 9 isoform a family protein	TGME49_247220	60639	3	6.04					3	51688
TGME49_232440-t26_1-p1	Brf1p family coiled coil protein	TGME49_232440	54044	3	9.19					3	51206
TGME49_222970-t26_1-p1	inositol(myo)-1(or 4)-monophosphatase 2, putative	TGME49_222970	32348	2	8.75							1	17394	2	32520
TGME49_236570-t26_1-p1	lysine decarboxylase family protein	TGME49_236570	43954	3	11.08	3	39479.4	2	10312.5
TGME49_215460-t26_1-p1	ribosomal protein RPS24	TGME49_215460	30375	1	4.87	1	11716.8	1	12401.4			1	11149.1	1	9504.73	1	4674.08
TGME49_227960-t26_1-p1	PCI domain-containing protein	TGME49_227960	55708	4	7.51					4	49159.2
TGME49_217460-t26_1-p1	glutaminyl-tRNA synthetase (GlnRS)	TGME49_217460	95527	4	6.28	4	48021.8									1	432.3
TGME49_297500-t26_1-p1	T-complex protein 1 eta subunit	TGME49_297500	59475	4	9.52	3	17722.3	2	5195.81	3	25212.7
TGME49_250710-t26_1-p1	microneme protein MIC10	TGME49_250710	23113	2	6.06													2	47775.5
TGME49_311310-t26_1-p1	protein phosphatase 2B catalytic subunit, calcineurin family phosphatse superfamily protein	TGME49_311310	56446	3	6.19					3	47734.2
TGME49_214290-t26_1-p1	DJ-1 family protein	TGME49_214290	27939	4	16.8			1	8850.24	1	7567.18	3	27296	1	3760.63
TGME49_315490-t26_1-p1	rhoptry protein ROP10	TGME49_315490	60912	3	5.63			3	46154.2
TGME49_293580-t26_1-p1	prefoldin subunit protein	TGME49_293580	18345	5	35.88													3	45967.6
TGME49_268200-t26_1-p1	RNA recognition motif-containing protein	TGME49_268200	66430	3	6.64							2	12399.3	3	30172.3	1	3298.67
TGME49_273520-t26_1-p1	PCI domain-containing protein	TGME49_273520	67341	5	11.65	4	45793.1
TGME49_211290-t26_1-p1	rhoptry protein ROP15	TGME49_211290	36588	2	9.31									2	34734.5	1	10382.5
TGME49_249970-t26_1-p1	hypothetical protein	TGME49_249970	24712	1	3.93											1	8768.91	1	35729.4
TGME49_273960-t26_1-p1	chaperonin GroS protein	TGME49_273960	39951	2	5.08											2	42556.4
TGME49_235930-t26_1-p1	domain K- type RNA binding proteins family protein	TGME49_235930	64265	4	7.02	1	5649.21	4	34666.1	1	1178.14
TGME49_223410-t26_1-p1	eukaryotic initiation factor-4E, putative	TGME49_223410	25981	1	4.44											1	40269.7
TGME49_293000-t26_1-p1	3'5'-cyclic nucleotide phosphodiesterase domain-containing protein	TGME49_293000	243909	1	0.31													1	39985
TGME49_291680-t26_1-p1	Sec23/Sec24 trunk domain-containing protein	TGME49_291680	87610	6	9.73	6	38563.6	1	989.022
TGME49_289970-t26_1-p1	hypothetical protein	TGME49_289970	24448	4	20.26											3	27357.1	1	11937.8
TGME49_232130-t26_1-p1	hypothetical protein	TGME49_232130	47866	3	10.09					3	39007.6
TGME49_313010-t26_1-p1	DEAD (Asp-Glu-Ala-Asp) box polypeptide DDX6	TGME49_313010	53434	4	10.53					4	38710
TGME49_247520-t26_1-p1	hypothetical protein	TGME49_247520	26536	1	3.91													1	38679.7
TGME49_201680-t26_1-p1	eukaryotic initiation factor-3 subunit 10, putative	TGME49_201680	119127	6	7.07	6	38155.9
TGME49_309730-t26_1-p1	thioredoxin reductase	TGME49_309730	70781	2	4.83	1	12087			1	25504.5
TGME49_275460-t26_1-p1	hypothetical protein	TGME49_275460	30743	2	12.63							2	37309.9
TGME49_323100-t26_1-p1	hypothetical protein	TGME49_323100	15886	1	8.28	1	37281.5
TGME49_281920-t26_1-p1	V-type ATPase, D subunit protein	TGME49_281920	27469	3	14.69											2	36832.9
TGME49_269885-t26_1-p1	rhoptry metalloprotease toxolysin TLN1	TGME49_269885	182009	8	6.75	6	34660.8					2	1369.52
TGME49_222160-t26_1-p1	aldehyde dehydrogenase	TGME49_222160	53702	3	8.65	1	3059.47			3	32520.5
TGME49_290890-t26_1-p1	carbonyl reductase 1, putative	TGME49_290890	44107	5	15.96							1	1068.62	4	34497.4
TGME49_216000-t26_1-p1	alveolin domain containing intermediate filament IMC3	TGME49_216000	58000	2	4.83			2	35515.4
TGME49_270560-t26_1-p1	peptidyl-prolyl cis-trans isomerase family 1	TGME49_270560	20859	2	6.15													1	35483.1
TGME49_222860-t26_1-p1	eukaryotic translation initiation factor, putative	TGME49_222860	88392	3	3.84	3	33569.4	1	1529.84
TGME49_212300-t26_1-p1	hypothetical protein	TGME49_212300	75643	6	9.66	3	33073.6	2	1991.84
TGME49_318230-t26_1-p1	phosphoglycerate kinase PGKI	TGME49_318230	44676	3	11.03	2	16127.2	3	18922.2
TGME49_279390-t26_1-p1	proliferation-associated protein 2G4, putative	TGME49_279390	50342	2	4.98	2	26205.5	1	4406.34	1	4355.36
TGME49_273090-t26_1-p1	cell division protein CDC48CY	TGME49_273090	89397	3	3.82	3	34934.1
TGME49_242680-t26_1-p1	ribosomal protein RPL24e	TGME49_242680	23444	1	6.63											1	34629.9
TGME49_315610-t26_1-p1	hypothetical protein	TGME49_315610	15971	1	17.09											1	33981.4
TGME49_267810-t26_1-p1	Rab 5	TGME49_267810	26503	5	26.56											4	33524.5
TGME49_240640-t26_1-p1	casein kinase I	TGME49_240640	37960	4	12.04							4	33121
TGME49_231160-t26_1-p1	hypothetical protein	TGME49_231160	18282	1	10.67											1	32463.3
TGME49_270550-t26_1-p1	gamma-glutamyl phosphate reductase, putative	TGME49_270550	54410	3	7.37					3	32430.6
TGME49_313140-t26_1-p1	isocitrate dehydrogenase	TGME49_313140	68296	5	7.41	2	1907.46	1	1189.16	4	29244.8
TGME49_245670-t26_1-p1	pyruvate dehydrogenase complex subunit PDH-E1Alpha	TGME49_245670	67460	4	5.83	1	5550.55	3	26769.1
TGME49_243910-t26_1-p1	Cof family hydrolase subfamily protein	TGME49_243910	40719	3	10.43									2	27603.3	1	4358.44
TGME49_211420-t26_1-p1	RNA recognition motif-containing protein	TGME49_211420	20398	2	14.62													2	31864.6
TGME49_205180-t26_1-p1	RNA recognition motif-containing protein	TGME49_205180	32011	3	9.12							1	10513.9	2	21308.4
TGME49_283698-t26_1-p1	hypothetical protein	TGME49_283698	37697	1	2.01	1	11505.8	1	19336.8
TGME49_248160-t26_1-p1	hypothetical protein	TGME49_248160	122418	1	0.73											1	29825
TGME49_200250-t26_1-p1	microneme protein MIC17A	TGME49_200250	38754	4	15.67									3	29775.4
TGME49_206470-t26_1-p1	pyruvate dehydrogenase complex subunit PDH-E3II	TGME49_206470	55121	2	5.01					2	29616
TGME49_246330-t26_1-p1	CRAL/TRIO domain-containing protein	TGME49_246330	48774	4	15.94					3	29529
TGME49_209600-t26_1-p1	hypothetical protein	TGME49_209600	50201	1	2.44	1	12384.9			1	13003							1	3926.54
TGME49_222220-t26_1-p1	alveolin domain containing intermediate filament IMC7	TGME49_222220	46812	1	3.5					1	29145.9
TGME49_309600-t26_1-p1	hypothetical protein	TGME49_309600	106522	4	5.1	2	9994.93	3	19083.2
TGME49_226550-t26_1-p1	TBC domain containing protein	TGME49_226550	35991	2	10.48									2	28808.9
TGME49_254770-t26_1-p1	Ser/Thr phosphatase family protein	TGME49_254770	46467	1	2.38							1	14319.2	1	14069.6
TGME49_219540-t26_1-p1	cytosolic tRNA-Ala synthetase	TGME49_219540	139516	7	7.03	5	28351
TGME49_263130-t26_1-p1	citrate synthase, putative	TGME49_263130	68929	1	1.77	1	28310.3
TGME49_310760-t26_1-p1	protein phosphatase 2C domain-containing protein	TGME49_310760	37632	4	14.24									3	27978.7
TGME49_219290-t26_1-p1	F-actin-capping protein subunit beta, putative	TGME49_219290	36258	2	3.04							2	22327	1	5525.54
TGME49_309760-t26_1-p1	hypothetical protein	TGME49_309760	34545	4	14.6											4	27581.7
TGME49_249390-t26_1-p1	glutamate/leucine/phenylalanine/valine dehydrogenase family protein	TGME49_249390	135701	5	5.72	5	27555.8
TGME49_275860-t26_1-p1	hypothetical protein	TGME49_275860	43160	3	9.4									3	26863
TGME49_265530-t26_1-p1	RNA recognition motif-containing protein	TGME49_265530	51488	3	8.94					2	26747.1
TGME49_249650-t26_1-p1	apolipoprotein A-I binding protein, putative	TGME49_249650	43547	2	6.89											1	4850.53	2	21794.4
TGME49_267080-t26_1-p1	26S protease regulatory subunit 4, putative	TGME49_267080	49121	3	6.12					3	26459
TGME49_232660-t26_1-p1	Hsp70 interacting protein HIP	TGME49_232660	45143	1	3.76	1	7172.9	1	2437.35	1	16781.9
TGME49_263040-t26_1-p1	ribosomal protein RPS16	TGME49_263040	24055	2	11.37	1	7774.73	1	4468.52			1	3270.14	1	2296.21	2	4702.74	1	3718.57
TGME49_236650-t26_1-p1	DEAD (Asp-Glu-Ala-Asp) box polypeptide 17	TGME49_236650	59968	2	4.73	1	5775.86			1	20434.5
TGME49_207620-t26_1-p1	pyridine nucleotide-disulfide oxidoreductase domain-containing protein	TGME49_207620	71159	2	3.92	2	22900.2			1	3261.35
TGME49_223140-t26_1-p1	tRNA binding domain-containing protein	TGME49_223140	50986	3	9.53					2	26047.6
TGME49_234380-t26_1-p1	hypothetical protein	TGME49_234380	38656	3	9.51									3	25990.7
TGME49_219080-t26_1-p1	edge expressed protein, putative	TGME49_219080	35404	1	3.19									1	25738.9
TGME49_277000-t26_1-p1	transport protein Sec24, putative	TGME49_277000	108035	3	3.14	3	25237
TGME49_205440-t26_1-p1	CCT chaperonin gamma subunit	TGME49_205440	60613	3	5.94	3	21012.8	2	3632.33
TGME49_229670-t26_1-p1	ribosomal protein RPS23	TGME49_229670	15802	2	12.59	1	4989.99											1	19423.5
TGME49_309210-t26_1-p1	peroxiredoxin 6, putative	TGME49_309210	44036	2	6.22	1	4847.36	1	2887.82	1	1242.84							2	15047.8
TGME49_290040-t26_1-p1	macrophage migration inhibitory factor, putative	TGME49_290040	12254	1	9.48			1	24012.6
TGME49_219210-t26_1-p1	ankyrin repeat-containing protein	TGME49_219210	30785	1	4.76									1	23607.5
TGME49_211260-t26_1-p1	rhoptry kinase family protein ROP26 (incomplete catalytic triad)	TGME49_211260	47826	3	7.82					3	23525.1
TGME49_266970-t26_1-p1	hypothetical protein	TGME49_266970	35139	1	4.58							1	23388.7
TGME49_319850-t26_1-p1	splicing factor U2AF family SnRNP auxilary factor large subunit, RRM domain-containing protein	TGME49_319850	51681	1	2.02					1	22697.6
TGME49_245470-t26_1-p1	mitotic checkpoint protein, BUB3 family protein	TGME49_245470	36575	2	9.04							2	22644.6
TGME49_225470-t26_1-p1	peptide methionine sulfoxide reductase	TGME49_225470	30384	2	8.92													2	22550.9
TGME49_219310-t26_1-p1	DnaK family protein	TGME49_219310	90143	4	4.16	4	22442.1
TGME49_240060-t26_1-p1	hypothetical protein	TGME49_240060	88533	2	2.49	2	22216.1
TGME49_208530-t26_1-p1	nicotinate phosphoribosyltransferase	TGME49_208530	65580	2	4.24	2	21871.7
TGME49_232340-t26_1-p1	protein phosphatase 2C domain-containing protein	TGME49_232340	59868	2	3.3	2	17299.2	1	4430.04
TGME49_307810-t26_1-p1	hypothetical protein	TGME49_307810	44172	1	2.13					1	21520.6
TGME49_237015-t26_1-p1	hypothetical protein	TGME49_237015	29389	2	12.12											2	21113.1
TGME49_235970-t26_1-p1	eukaryotic initiation factor-2 gamma, putative	TGME49_235970	50509	4	14.62					3	20949.6
TGME49_265310-t26_1-p1	heat shock protein 40, putative	TGME49_265310	37197	3	11.01							2	20924.6
TGME49_243930-t26_1-p1	hypothetical protein	TGME49_243930	101348	6	7.42							2	6041.33	4	14751.9
TGME49_288630-t26_1-p1	nucleosome assembly protein (NAP), putative	TGME49_288630	32081	1	3.56									1	20349.6
TGME49_219850-t26_1-p1	prolyl-tRNA synthetase (ProRS)	TGME49_219850	93479	6	9.88	5	20302.9
TGME49_244390-t26_1-p1	coatomer epsilon subunit protein	TGME49_244390	33932	4	18.12									2	20256.2
TGME49_258060-t26_1-p1	myosin heavy chain, putative	TGME49_258060	23352	3	15.87													3	19620.1
TGME49_269200-t26_1-p1	crooked neck family 1 protein isoform 2, putative	TGME49_269200	81694	2	2.92			2	19502.8
TGME49_219550-t26_1-p1	dihydrolipoyllysine-residue succinyltransferase component of oxoglutarate dehydrogenase	TGME49_219550	50126	1	3.62	1	9365.64	1	6575.59	1	3368.59
TGME49_294620-t26_1-p1	eukaryotic initiation factor-3, subunit 8, putative	TGME49_294620	109193	4	5.87	4	19104.1
TGME49_203390-t26_1-p1	CRAL/TRIO domain-containing protein	TGME49_203390	50481	2	4.61					1	19072.2
TGME49_292080-t26_1-p1	leucyl-tRNA synthetase	TGME49_292080	141139	4	3.65	4	18980.5
TGME49_268890-t26_1-p1	citrate synthase I	TGME49_268890	60382	1	2.14	1	10816	1	7980.14
TGME49_257740-t26_1-p1	UMP-CMP kinase	TGME49_257740	50995	3	8.87											3	18780.8
TGME49_232720-t26_1-p1	Lsm12, putative	TGME49_232720	27081	2	8.43									2	18686.3
TGME49_268760-t26_1-p1	hypothetical protein	TGME49_268760	31988	1	3.08											1	18398.1
TGME49_215160-t26_1-p1	hypothetical protein	TGME49_215160	31176	1	2.23													1	18321.3
TGME49_313440-t26_1-p1	hypothetical protein	TGME49_313440	35503	2	6.8							2	18253.8
TGME49_273905-t26_1-p1	hypothetical protein	TGME49_273905	57444	4	6.95							4	15528.8	1	2572.72
TGME49_249630-t26_1-p1	glutathione S-transferase, N-terminal domain-containing protein	TGME49_249630	48647	2	4.79											2	18063.4
TGME49_263430-t26_1-p1	3-hydroxyisobutyrate dehydrogenase	TGME49_263430	34160	2	9.06									2	17933.1
TGME49_310700-t26_1-p1	serine/threonine phosophatase PP1	TGME49_310700	35005	2	9.8									2	17557.4
TGME49_230520-t26_1-p1	cyclophilin 1, putative	TGME49_230520	26224	1	5.06													1	17241.6
TGME49_291330-t26_1-p1	RNA recognition motif-containing protein	TGME49_291330	25512	1	3.51											1	17211.1
TGME49_310790-t26_1-p1	hypothetical protein	TGME49_310790	24708	1	8.22													1	17198.3
TGME49_250880-t26_1-p1	kinase, pfkB family protein	TGME49_250880	49957	2	8.17							2	17078.4
TGME49_312480-t26_1-p1	uracil phosphoribosyltransferase FUR1, putative	TGME49_312480	27646	2	9.02											1	6945.78	2	10091.1
TGME49_208970-t26_1-p1	RNA recognition motif-containing protein	TGME49_208970	33732	1	3.53									1	17030.1
TGME49_220880-t26_1-p1	hypothetical protein	TGME49_220880	23552	2	6.9													1	16773.6
TGME49_220890-t26_1-p1	hypothetical protein	TGME49_220890	51196	4	11.23							4	16697.4
TGME49_221470-t26_1-p1	hypothetical protein	TGME49_221470	61517	2	4.71	2	14104	1	2554.57
TGME49_260010-t26_1-p1	acetyltransferase, GNAT family protein	TGME49_260010	25830	1	4.66											1	16583.7
TGME49_312110-t26_1-p1	apicoplast-associated thioredoxin family protein Atrx1	TGME49_312110	86834	2	2.41					2	16324.4
TGME49_212270-t26_1-p1	hypothetical protein	TGME49_212270	40843	1	3.24													1	16083.2
TGME49_223930-t26_1-p1	RNA recognition motif-containing protein	TGME49_223930	40672	3	7.85									3	16080.2
TGME49_217820-t26_1-p1	PCI domain-containing protein	TGME49_217820	51723	2	4.32					2	15994.6
TGME49_255260-t26_1-p1	apical membrane antigen AMA1	TGME49_255260	63021	1	2.46					1	15575.6
TGME49_316250-t26_1-p1	hypothetical protein	TGME49_316250	44749	1	3.81							1	15483.5
TGME49_306930-t26_1-p1	proteasome subunit beta type 7 precursor, putative	TGME49_306930	39588	2	7.61					1	2062.85							2	13343.9
TGME49_305980-t26_1-p1	pyruvate dehydrogenase complex subunit PDH-E3I	TGME49_305980	66839	1	2.51					1	15332.6
TGME49_319950-t26_1-p1	rRNA-processing protein FCF1, putative	TGME49_319950	23022	1	5.47													1	15317.7
TGME49_239010-t26_1-p1	hypothetical protein	TGME49_239010	79588	2	4.15			2	15137.2
TGME49_314400-t26_1-p1	pyruvate dehydrogenase E1 component, beta subunit, putative	TGME49_314400	45599	3	10.87							3	15088.3
TGME49_209910-t26_1-p1	histone H2Bv	TGME49_209910	13732	1	8.13													1	14773.9
TGME49_229000-t26_1-p1	kelch repeat-containing protein	TGME49_229000	68113	2	5.32	1	7063.66	1	7557.5
TGME49_203870-t26_1-p1	RAB43, member RAS oncogene family protein	TGME49_203870	32236	1	3.51									1	14450.6
TGME49_263060-t26_1-p1	Proteasome/cyclosome repeat-containing protein	TGME49_263060	125593	3	3.37	3	14431.2
TGME49_233500-t26_1-p1	triose-phosphate isomerase TPI-II	TGME49_233500	39560	2	6.93											2	14403
TGME49_251880-t26_1-p1	tRNA synthetases class I family protein	TGME49_251880	60170	2	3.7	2	12721.4			1	1444.41
TGME49_212250-t26_1-p1	XPG N-terminal domain-containing protein	TGME49_212250	86945	5	7.04	3	6782.47	3	7320.75
TGME49_262730-t26_1-p1	rhoptry protein ROP16	TGME49_262730	76216	2	3.54			1	4664.85	1	9273.2
TGME49_218530-t26_1-p1	proteasome-interacting thioredoxin domain-containing protein	TGME49_218530	38083	1	4.64													1	13840.4
TGME49_226410-t26_1-p1	EF-1 guanine nucleotide exchange domain-containing protein	TGME49_226410	36049	1	2.74			1	13804.5
TGME49_236910-t26_1-p1	U2 snRNP auxiliary factor, putative	TGME49_236910	29492	1	6.69											1	13759.3
TGME49_236070-t26_1-p1	pyrroline-5-carboxylate reductase	TGME49_236070	36211	3	10.98											2	13554.1
TGME49_209160-t26_1-p1	myristoyl CoA:protein N-myristoyltransferase	TGME49_209160	52377	2	3.46					2	13534.3
TGME49_284540-t26_1-p1	ATP synthase F1, delta subunit protein	TGME49_284540	27635	2	6.35													1	13488.2
TGME49_206610-t26_1-p1	pyruvate dehydrogenase complex subunit PDH-E2	TGME49_206610	96880	2	2.8	2	13485.5
TGME49_208450-t26_1-p1	protease inhibitor PI2	TGME49_208450	35309	1	3.14									1	13175.1
TGME49_237150-t26_1-p1	minor histocompatibility antigen h13, putative	TGME49_237150	46261	1	2.64									1	13160.6
TGME49_255420-t26_1-p1	hypothetical protein	TGME49_255420	30213	2	10.79									2	13150.1
TGME49_221950-t26_1-p1	splicesome-associated protein, putative	TGME49_221950	64912	1	1.61	1	7378.37	1	5755.16
TGME49_320110-t26_1-p1	proliferating cell nuclear antigen PCNA2	TGME49_320110	32265	2	10.1									2	13003.6
TGME49_290030-t26_1-p1	hypothetical protein	TGME49_290030	26566	3	8.3													2	12939.5
TGME49_218520-t26_1-p1	microneme protein MIC6	TGME49_218520	36669	2	10.03							1	3663.36	1	9111.11
TGME49_202770-t26_1-p1	RNA recognition motif-containing protein	TGME49_202770	55868	1	2.26							1	5734.69					1	6737.35
TGME49_314100-t26_1-p1	tetratricopeptide repeat-containing protein	TGME49_314100	64293	1	1.38			1	12469
TGME49_287210-t26_1-p1	proteasome subunit alpha2, protease of the acylase family and NTN hydrolase fold, putative	TGME49_287210	25867	1	5.51													1	12371.5
TGME49_263070-t26_1-p1	CMGC kinase, CK2 family	TGME49_263070	59824	1	2.41	1	9878.7							1	2477.02
TGME49_215060-t26_1-p1	small GTP-binding protein sar1, putative	TGME49_215060	22139	1	5.73			1	8263.67					1	4089.41
TGME49_251950-t26_1-p1	ribosomal protein l7/l12 c-terminal domain-containing protein	TGME49_251950	36757	1	3.95											1	12323.3
TGME49_300120-t26_1-p1	aminotransferase, class V superfamily protein	TGME49_300120	89642	2	2.83	2	12160.6
TGME49_307850-t26_1-p1	6-phosphogluconate dehydrogenase	TGME49_307850	54701	1	1.78					1	11844.6
TGME49_256770-t26_1-p1	eukaryotic translation initiation factor 4A, isoform 3, putative	TGME49_256770	45126	2	5.82	1	6085			1	5724.87
TGME49_202530-t26_1-p1	aspartate-tRNA ligase	TGME49_202530	86802	2	2.33	2	10416.2	1	1378.52
TGME49_315690-t26_1-p1	DnaJ domain-containing protein	TGME49_315690	34154	1	3.41							1	11791.6
TGME49_239740-t26_1-p1	dense granule protein GRA14	TGME49_239740	44711	2	4.9							2	11790.7
TGME49_313410-t26_1-p1	proteasome 26S regulatory subunit	TGME49_313410	117709	3	2.93	3	11740.7
TGME49_309820-t26_1-p1	ribosomal protein RPL11	TGME49_309820	20199	1	4.57							1	11719.7
TGME49_249850-t26_1-p1	GAP40 protein	TGME49_249850	43082	1	1.56									1	11629.4
TGME49_310460-t26_1-p1	Rab6	TGME49_310460	23471	2	12.44													2	11419.5
TGME49_205710-t26_1-p1	lysine-tRNA ligase	TGME49_205710	74395	1	2.28	1	3408.57	1	7878.96
TGME49_267500-t26_1-p1	hypothetical protein	TGME49_267500	25697	1	4.78											1	11263
TGME49_299810-t26_1-p1	cysteine-tRNA synthetase (CysRS)	TGME49_299810	101371	3	3.9			3	11226.8
TGME49_262690-t26_1-p1	ribosomal protein RPL27	TGME49_262690	16802	1	9.59													1	11172.3
TGME49_226510-t26_1-p1	Sec23/Sec24 trunk domain-containing protein	TGME49_226510	165235	4	3.51	4	11009.6
TGME49_319340-t26_1-p1	hypothetical protein	TGME49_319340	52403	1	2.7					1	10977.6
TGME49_271610-t26_1-p1	pyrroline-5-carboxylate reductase	TGME49_271610	40683	2	3.2											2	10933.3
TGME49_237110-t26_1-p1	replication factor C subunit 2, putative	TGME49_237110	39797	1	2.52							1	10927.3
TGME49_314810-t26_1-p1	ribosomal protein RPL7	TGME49_314810	30122	1	5.43					1	6228.63	1	4480.98
TGME49_311400-t26_1-p1	WD domain, G-beta repeat-containing protein	TGME49_311400	165572	2	1.64	2	10633
TGME49_310750-t26_1-p1	emp24/gp25L/p24 family protein	TGME49_310750	64977	4	13.31			3	10568.6
TGME49_219820-t26_1-p1	polyubiquitin UbC, putative	TGME49_219820	68581	2	37.97	2	8377.96									1	2189.01
TGME49_231410-t26_1-p1	hypothetical protein	TGME49_231410	64728	1	1.58					1	10496.5
TGME49_222952-t26_1-p1	phosphohistidine phosphatase	TGME49_222952	42100	1	1.81											1	10416.1
TGME49_239260-t26_1-p1	histone H4	TGME49_239260	11439	2	16.5													1	10392
TGME49_297970-t26_1-p1	aspartyl aminopeptidase	TGME49_297970	55897	3	10.04	1	1839.75			2	8457.59
TGME49_294790-t26_1-p1	hypothetical protein	TGME49_294790	37700	1	3.13							1	10252.4
TGME49_312090-t26_1-p1	ribosomal protein RPL23	TGME49_312090	14818	1	10.79	1	4632.16	1	3369.16	1	2123.47
TGME49_212290-t26_1-p1	ribosomal protein RPS19	TGME49_212290	34993	1	4.15			1	3333.56	1	2206.62	1	1364.39	1	1283.28			1	1936.51
TGME49_268790-t26_1-p1	hypothetical protein	TGME49_268790	27456	2	8.33											2	9998.6
TGME49_224850-t26_1-p1	polyadenylate binding protein, putative	TGME49_224850	82573	2	3.12	1	7681.73	1	2181
TGME49_230210-t26_1-p1	alveolin domain containing intermediate filament IMC10	TGME49_230210	61188	2	6.61							2	9832.4
TGME49_256050-t26_1-p1	signal recognition particle 14kd protein	TGME49_256050	18965	1	8.14									1	1674.7			1	8005.87
TGME49_220090-t26_1-p1	hypothetical protein	TGME49_220090	28050	2	9.89									2	9645.33
TGME49_217680-t26_1-p1	hypothetical protein	TGME49_217680	246147	6	3.49	3	6781.07	2	1846.99	1	976.465
TGME49_205320-t26_1-p1	hypothetical protein	TGME49_205320	70850	1	6.87			1	9601.73
TGME49_201800-t26_1-p1	hypothetical protein	TGME49_201800	28527	1	3.75													1	9590.65
TGME49_263500-t26_1-p1	vacuolar protein sorting-associated protein 26, putative	TGME49_263500	42225	1	3.53									1	9445.94
TGME49_214940-t26_1-p1	MIC2-associated protein M2AP	TGME49_214940	34552	2	7.27									1	9158.58
TGME49_207640-t26_1-p1	isoleucyl-tRNA synthetase family protein	TGME49_207640	141532	1	0.64	1	8872.42
TGME49_227030-t26_1-p1	hypothetical protein	TGME49_227030	18688	1	7.06					1	8850.81
TGME49_286080-t26_1-p1	elongation factor 2 family protein	TGME49_286080	113342	3	3.08	3	8849.42
TGME49_269690-t26_1-p1	hypothetical protein	TGME49_269690	94304	2	2.89			2	8727.25
TGME49_306960-t26_1-p1	phenylalanine--tRNA ligase, beta subunit protein	TGME49_306960	74585	2	4.3			2	8724.1
TGME49_310010-t26_1-p1	rhoptry neck protein RON1	TGME49_310010	127433	3	3.54			3	8639.83
TGME49_310080-t26_1-p1	AMP-binding enzyme domain-containing protein	TGME49_310080	87848	2	3.04	2	8572.31
TGME49_240590-t26_1-p1	DNA-directed RNA polymerase II RPB5	TGME49_240590	24018	1	6.83													1	8295.92
TGME49_229180-t26_1-p1	HEAT repeat-containing protein	TGME49_229180	136164	2	1.86	2	8264.44
TGME49_263870-t26_1-p1	glutamate-tRNA ligase	TGME49_263870	95128	2	2.94	1	8247.11
TGME49_231920-t26_1-p1	oxidoreductase, short chain dehydrogenase/reductase family protein	TGME49_231920	33735	1	3.3									1	8205.64
TGME49_233110-t26_1-p1	IMP dehydrogenas	TGME49_233110	59104	1	3.63	1	2998.11			1	5176.61
TGME49_306910-t26_1-p1	hypothetical protein	TGME49_306910	55691	1	1.73					1	8052.63
TGME49_213520-t26_1-p1	peptidase M20D, amidohydrolase	TGME49_213520	55117	2	4.67					2	7983.87
TGME49_291930-t26_1-p1	RNA recognition motif-containing protein	TGME49_291930	73118	2	3.12	2	7787.13
TGME49_251620-t26_1-p1	flap structure-specific endonuclease 1, putative	TGME49_251620	60296	1	1.45			1	7734.29
TGME49_253730-t26_1-p1	importin-beta N-terminal domain-containing protein	TGME49_253730	115146	2	1.81	2	7728.02
TGME49_269670-t26_1-p1	hypothetical protein	TGME49_269670	235803	1	0.61					1	7675.57
TGME49_239760-t26_1-p1	ribosomal protein RPL22	TGME49_239760	15074	1	12.78													1	7525.74
TGME49_220270-t26_1-p1	alveolin domain containing intermediate filament IMC6	TGME49_220270	48635	1	3.6					1	7522.74
TGME49_231040-t26_1-p1	3' exoribonuclease family, domain 1 domain-containing protein	TGME49_231040	35227	1	5.87							1	7494.91
TGME49_269950-t26_1-p1	hypothetical protein	TGME49_269950	104680	2	2.12	2	5428.83					1	2002.67
TGME49_231940-t26_1-p1	ThiF family protein	TGME49_231940	36031	1	3.85	1	7365.33
TGME49_221490-t26_1-p1	cell cycle regulator protein	TGME49_221490	20071	1	7.22													1	7238.47
TGME49_251930-t26_1-p1	enoyl-acyl carrier reductase ENR	TGME49_251930	43658	3	15.11							1	2133	1	5081.58
TGME49_285180-t26_1-p1	hypothetical protein	TGME49_285180	69785	1	1.42					1	7114.04
TGME49_247470-t26_1-p1	nucleolar protein, putative	TGME49_247470	59940	3	7.46			1	7022
TGME49_233230-t26_1-p1	RNA-binding protein 8A family protein	TGME49_233230	18410	1	6.17													1	6910.49
TGME49_248400-t26_1-p1	glyoxalase I, putative	TGME49_248400	38472	2	6.25							2	6859.41
TGME49_309752-t26_1-p1	succinate-Coenzyme A ligase, beta subunit, putative	TGME49_309752	53389	1	1.41	1	6787.82
TGME49_305820-t26_1-p1	SGS domain-containing protein	TGME49_305820	29999	1	7.25									1	6748.18
TGME49_281570-t26_1-p1	hypothetical protein	TGME49_281570	52995	1	1.86					1	6738.12
TGME49_312530-t26_1-p1	splicing factor, CC1 family protein	TGME49_312530	69366	1	1.9			1	6638.91
TGME49_249250-t26_1-p1	ribosomal protein RPL35A	TGME49_249250	12847	1	8.93											1	6508.18
TGME49_271440-t26_1-p1	NPL4 family protein	TGME49_271440	55803	1	1.99	1	2610.83			1	3728.21
TGME49_202680-t26_1-p1	peptidase M16, alpha subunit, putative	TGME49_202680	62204	1	1.78					1	6213.87
TGME49_272010-t26_1-p1	Gar1 protein RNA binding region protein	TGME49_272010	20931	1	6.19													1	6197.45
TGME49_280600-t26_1-p1	histidyl-tRNA synthetase (HisRS), putative	TGME49_280600	134876	2	2	2	6099.89
TGME49_216900-t26_1-p1	cytokine induced apoptosis inhibitor 1 family protein	TGME49_216900	47563	1	2.71							1	2962.06	1	2912.84
TGME49_318160-t26_1-p1	MSP (Major sperm protein) domain-containing protein	TGME49_318160	25975	2	17.15											1	5872.82
TGME49_229930-t26_1-p1	p25-alpha family protein	TGME49_229930	17340	1	7.98	1	4468.05											1	1303.99
TGME49_251810-t26_1-p1	translation initiation factor eIF-5A, putative	TGME49_251810	17468	1	7.45													1	5645.66
TGME49_315320-t26_1-p1	SAG-related sequence SRS52A	TGME49_315320	34260	1	3.65											1	5640.84
TGME49_249900-t26_1-p1	adenine nucleotide translocator, putative	TGME49_249900	35256	2	8.49									2	5552.41
TGME49_280370-t26_1-p1	hypothetical protein	TGME49_280370	71866	2	5.41	2	5540.13
TGME49_291640-t26_1-p1	aspartate carbamoyltransferase	TGME49_291640	46921	1	2.84	1	5514.96
TGME49_229250-t26_1-p1	ribosomal protein RPL28	TGME49_229250	14753	1	8.53									1	5495.62
TGME49_273110-t26_1-p1	SAG-related sequence SRS30D	TGME49_273110	44797	1	1.91									1	5472.6
TGME49_235020-t26_1-p1	COPI protein, putative	TGME49_235020	137057	3	2.39									3	5464.37
TGME49_249360-t26_1-p1	RED family protein	TGME49_249360	66928	1	1.54			1	5424.73
TGME49_301170-t26_1-p1	SAG-related sequence SRS19D	TGME49_301170	40364	1	2.83									1	5373.51
TGME49_222100-t26_1-p1	hypothetical protein	TGME49_222100	128318	1	0.7					1	5298.93
TGME49_244690-t26_1-p1	hypothetical protein	TGME49_244690	65004	1	1.93			1	5214.23
TGME49_212960-t26_1-p1	hypothetical protein	TGME49_212960	47540	1	2.64					1	5181.85
TGME49_321530-t26_1-p1	cathepsin CPL	TGME49_321530	47551	1	3.32													1	5150.6
TGME49_209890-t26_1-p1	hypothetical protein	TGME49_209890	22011	1	8.29													1	5120.83
TGME49_297940-t26_1-p1	single-strand binding protein	TGME49_297940	60319	1	1.58													1	5109.23
TGME49_227290-t26_1-p1	histone deacetylase HDAC3	TGME49_227290	50458	1	4.43					1	5098.47
TGME49_263700-t26_1-p1	ribosomal protein RPS14	TGME49_263700	16302	1	7.05									1	5092.07
TGME49_220500-t26_1-p1	UBX domain-containing protein	TGME49_220500	43079	1	4.39											1	5072.73
TGME49_318700-t26_1-p1	eukaryotic initiation factor-6, putative	TGME49_318700	28573	1	3.79											1	5059.94
TGME49_216260-t26_1-p1	eukaryotic initiation factor-2B, gamma subunit, putative	TGME49_216260	58016	1	2.48	1	5045.56
TGME49_216670-t26_1-p1	FUSE-binding protein 2 / KH-type splicing regulatory protein	TGME49_216670	100094	2	3.19	2	5035.18
TGME49_239590-t26_1-p1	WD domain, G-beta repeat-containing protein	TGME49_239590	74725	2	4.1			1	5033.14
TGME49_244250-t26_1-p1	hypothetical protein	TGME49_244250	62902	1	4.22			1	5011.87
TGME49_249990-t26_1-p1	hypothetical protein	TGME49_249990	92586	1	1.79	1	4969.49
TGME49_219180-t26_1-p1	acetyltransferase, GNAT family protein	TGME49_219180	84404	1	1.03							1	4943.98
TGME49_277680-t26_1-p1	hypothetical protein	TGME49_277680	20391	2	8.99													1	4921.1
TGME49_285230-t26_1-p1	PRP38 family protein	TGME49_285230	68774	1	1.63			1	4918.67
TGME49_201380-t26_1-p1	chorismate synthase, putative	TGME49_201380	58104	1	2.61	1	2624.45			1	2286.6
TGME49_213870-t26_1-p1	UBA/TS-N domain-containing protein	TGME49_213870	117178	1	1.4	1	4897.49
TGME49_226430-t26_1-p1	reticulon protein	TGME49_226430	21621	1	9.18	1	4866.43
TGME49_286920-t26_1-p1	SWIRM domain-containing protein	TGME49_286920	83974	2	3.21	2	4855.08
TGME49_320070-t26_1-p1	CDK-activating kinase assembly factor MAT1 protein	TGME49_320070	32682	1	3.58									1	4789.04
TGME49_268580-t26_1-p1	hypothetical protein	TGME49_268580	53630	1	2.1					1	4746.39
TGME49_320210-t26_1-p1	WD domain, G-beta repeat domain containing protein	TGME49_320210	56081	1	3.5	1	4636.17
TGME49_253290-t26_1-p1	valyl-tRNA synthetase	TGME49_253290	125050	1	0.72	1	4605.16
TGME49_222380-t26_1-p1	importin-beta N-terminal domain-containing protein	TGME49_222380	129488	1	0.7	1	4586.23
TGME49_233010-t26_1-p1	cell-cycle-assocaited protein kinase ERK7, putative	TGME49_233010	73113	1	1.18			1	4574.52
TGME49_226520-t26_1-p1	hypothetical protein	TGME49_226520	26640	1	7.32											1	4528.44
TGME49_239710-t26_1-p1	phosphomannomutase	TGME49_239710	28674	1	5.02											1	4521.63
TGME49_285720-t26_1-p1	ATP binding protein, putative	TGME49_285720	45735	2	5.1					2	4456.8
TGME49_279380-t26_1-p1	hypothetical protein	TGME49_279380	34769	1	5.62									1	4378.17
TGME49_320220-t26_1-p1	ubiquinol cytochrome c oxidoreductase, putative	TGME49_320220	54792	1	3.49							1	4370.88
TGME49_231190-t26_1-p1	arsenite-activated ATPase family protein	TGME49_231190	44049	1	2.52	1	4212.42
TGME49_316900-t26_1-p1	Sas10 C-terminal domain-containing protein	TGME49_316900	90550	1	1.5	1	4174.5
TGME49_247300-t26_1-p1	hypothetical protein	TGME49_247300	95512	2	2.33	1	3247.68									1	810.987
TGME49_291950-t26_1-p1	RNA recognition motif-containing protein	TGME49_291950	73853	1	1.93			1	4006.1
TGME49_313080-t26_1-p1	hypothetical protein	TGME49_313080	49528	1	3.08	1	3890.84
TGME49_202370-t26_1-p1	T-complex protein 1, epsilon subunit (TCP-1-epsilon), putative	TGME49_202370	58618	1	2.61	1	3876.27
TGME49_282170-t26_1-p1	hypothetical protein	TGME49_282170	61155	1	1.39					1	3850.79
TGME49_290850-t26_1-p1	WD-40 repeat protein	TGME49_290850	58309	1	2.5					1	3819.34
TGME49_227948-t26_1-p1	peptidase M16 inactive domain-containing protein	TGME49_227948	142764	1	0.77	1	3801.94
TGME49_273370-t26_1-p1	coatomer gamma 2-subunit protein, putative	TGME49_273370	112294	1	1.15	1	2740.56	1	1059.4
TGME49_281620-t26_1-p1	aldo/keto reductase family oxidoreductase	TGME49_281620	56746	1	2.32							1	3765.7
TGME49_320180-t26_1-p1	SAG-related sequence SRS16C	TGME49_320180	42346	1	4.02									1	3713.16
TGME49_277760-t26_1-p1	adenylosuccinate lyase, putative	TGME49_277760	74234	2	3.78			1	3655.52
TGME49_314750-t26_1-p1	hypothetical protein	TGME49_314750	49995	1	3.62					1	3588.19
TGME49_248990-t26_1-p1	hypothetical protein	TGME49_248990	79089	1	1.25			1	3580.21
TGME49_321620-t26_1-p1	dynamin-related protein DRPB	TGME49_321620	95931	1	0.93													1	3502.58
TGME49_227810-t26_1-p1	rhoptry kinase family protein ROP11 (incomplete catalytic triad)	TGME49_227810	58034	1	2.67	1	3357.7
TGME49_314000-t26_1-p1	peptide methionine sulfoxide reductase msrB, putative	TGME49_314000	26896	1	4.96													1	3348.39
TGME49_236210-t26_1-p1	peptidase M16 family potein, putative	TGME49_236210	56916	1	3.14					1	3280.61
TGME49_259710-t26_1-p1	protein kinase	TGME49_259710	28946	1	5.18													1	3268.9
TGME49_202690-t26_1-p1	DNA-directed RNA polymerase II RPB9	TGME49_202690	28170	1	4.8									1	3254.2
TGME49_228290-t26_1-p1	phospholipase/carboxylesterase	TGME49_228290	52044	1	3.51									1	3252.38
TGME49_249670-t26_1-p1	cathepsin B	TGME49_249670	62477	1	2.27											1	3239.93
TGME49_284190-t26_1-p1	pyruvate carboxylase	TGME49_284190	152146	1	0.93	1	3218.95
TGME49_221522-t26_1-p1	adaptor complexes medium subunit family protein	TGME49_221522	61127	2	3.68							1	3134.7
TGME49_277740-t26_1-p1	zinc finger, C3HC4 type (RING finger) domain-containing protein	TGME49_277740	187626	1	0.79													1	3037.93
TGME49_251760-t26_1-p1	subunit of proteaseome activator complex, putative	TGME49_251760	30711	1	4.83									1	3037.55
TGME49_243540-t26_1-p1	WD domain, G-beta repeat-containing protein	TGME49_243540	77280	1	2.25	1	3013.09
TGME49_318510-t26_1-p1	N-ethylmaleimide-sensitive fusion protein, putative	TGME49_318510	83467	1	2			1	2986
TGME49_217540-t26_1-p1	RNA recognition motif-containing protein	TGME49_217540	38104	1	3.13											1	2960.45
TGME49_214490-t26_1-p1	peptidase M16 inactive domain-containing protein	TGME49_214490	148868	1	0.89	1	2958.35
TGME49_269980-t26_1-p1	preprotein translocase Sec61, putative	TGME49_269980	52165	1	1.9							1	2936.82
TGME49_240090-t26_1-p1	rhoptry kinase family protein ROP34, putative	TGME49_240090	61668	2	4.7					2	2874.75
TGME49_264000-t26_1-p1	aldehyde dehydrogenase	TGME49_264000	68990	1	1.28			1	2839.78
TGME49_202460-t26_1-p1	diacylglycerol kinase accessory domain (presumed) domain-containing protein	TGME49_202460	72936	1	2.06	1	951.884	1	1847.4
TGME49_277840-t26_1-p1	Ras family protein	TGME49_277840	28980	1	3.89											1	2789.37
TGME49_235980-t26_1-p1	ARIADNE family protein	TGME49_235980	74992	1	1.04			1	2611.01
TGME49_230960-t26_1-p1	splicing factor 3b, subunit 3, putative	TGME49_230960	135744	1	1.14	1	2566.95
TGME49_300260-t26_1-p1	threonyl-tRNA synthetase family protein	TGME49_300260	95898	2	3.08	2	2511.92
TGME49_210360-t26_1-p1	DEAD (Asp-Glu-Ala-Asp) box polypeptide 41 family protein	TGME49_210360	73228	1	1.98			1	2425.23
TGME49_211690-t26_1-p1	AAA family protein	TGME49_211690	167149	2	1.76	2	2383.78
TGME49_220260-t26_1-p1	hypothetical protein	TGME49_220260	63404	1	1.85			1	1726.41			1	648.374
TGME49_286480-t26_1-p1	hypothetical protein	TGME49_286480	17098	1	5.81											1	2345.12
TGME49_220100-t26_1-p1	phosphoribosylpyrophosphate synthetase	TGME49_220100	61019	1	2.87	1	2333.65
TGME49_309140-t26_1-p1	transducin beta-like protein TBL1	TGME49_309140	84699	1	1.13	1	2245.57
TGME49_293360-t26_1-p1	hypothetical protein	TGME49_293360	26752	1	4.53									1	2232.99
TGME49_224050-t26_1-p1	AP2 domain transcription factor AP2X-4	TGME49_224050	93810	1	1.34	1	2194.41
TGME49_279450-t26_1-p1	adenylosuccinate synthetase, putative	TGME49_279450	50590	1	2.39	1	2189.4
TGME49_267050-t26_1-p1	hydrolase, alpha/beta fold family protein	TGME49_267050	34049	2	7.79							1	2173.15
TGME49_268970-t26_1-p1	hypothetical protein	TGME49_268970	36190	1	3.3									1	2139.67
TGME49_262400-t26_1-p1	lipase	TGME49_262400	155950	1	0.92	1	2124.02
TGME49_216510-t26_1-p1	thioredoxin, putative	TGME49_216510	78650	1	1.13			1	2068.63
TGME49_276170-t26_1-p1	phosphatidylinositol 3- and 4-kinase	TGME49_276170	134544	1	0.57	1	2038.18
TGME49_267480-t26_1-p1	tRNA (guanine(26)-N(2))-dimethyltransferase, putative	TGME49_267480	76065	1	1.87	1	976.888	1	1040.69
TGME49_206510-t26_1-p1	toxolysin TLN4	TGME49_206510	246741	3	1.84	1	649.31							2	1356.43
TGME49_308950-t26_1-p1	histidine acid phosphatase superfamily protein	TGME49_308950	66303	1	1.84					1	1945.17
TGME49_246130-t26_1-p1	serpin (serine proteinase inhibitor) superfamily protein	TGME49_246130	47407	1	2.31							1	1932.66
TGME49_273030-t26_1-p1	phosphoglycerate mutase family protein	TGME49_273030	34242	1	3.26							1	1918.41
TGME49_264440-t26_1-p1	signal recognition particle receptor beta subunit protein	TGME49_264440	37369	1	2.31							1	1915.86
TGME49_211890-t26_1-p1	RAP domain-containing protein	TGME49_211890	572334	1	0.15											1	1845.73
TGME49_206590-t26_1-p1	calcium-dependent protein kinase CDPK2A	TGME49_206590	86378	1	1.78			1	1843.33
TGME49_203290-t26_1-p1	hypothetical protein	TGME49_203290	35957	1	2.73													1	1838.55
TGME49_290290-t26_1-p1	ubiquitin-activating enzyme E1 family protein	TGME49_290290	119811	1	1.01	1	1838.35
TGME49_236840-t26_1-p1	zinc finger (C-x8-C-x5-C-x3-H)-2, putative	TGME49_236840	41962	1	3.49					1	1802.01
TGME49_275650-t26_1-p1	hypothetical protein	TGME49_275650	101159	1	1.37	1	1767.58
TGME49_312200-t26_1-p1	serine/threonine protein phosphatase	TGME49_312200	61537	1	2.01	1	1731.15
TGME49_288680-t26_1-p1	endonuclease IV APN	TGME49_288680	72252	1	1.2											1	1702.88
TGME49_321650-t26_1-p1	hypothetical protein	TGME49_321650	153573	1	0.65									1	1696.68
TGME49_293060-t26_1-p1	SPRY domain-containing protein	TGME49_293060	80291	1	2.03	1	1678.06
TGME49_219710-t26_1-p1	hypothetical protein	TGME49_219710	200026	1	0.58	1	1636.69
TGME49_219320-t26_1-p1	acid phosphatase GAP50	TGME49_219320	46607	1	2.55					1	1623.44
TGME49_235470-t26_1-p1	myosin A	TGME49_235470	93320	2	2.41	1	1584.5
TGME49_202870-t26_1-p1	SAP domain-containing protein	TGME49_202870	55645	1	3.36									1	1564.79
TGME49_219250-t26_1-p1	acetyltransferase, GNAT family protein	TGME49_219250	89518	1	1.34			1	1536.95
TGME49_256990-t26_1-p1	glycyl-tRNA synthetase	TGME49_256990	86374	1	1.69	1	1510.51
TGME49_299070-t26_1-p1	pyruvate kinase PyKII	TGME49_299070	106814	1	1.42			1	1508.75
TGME49_202390-t26_1-p1	S15 sporozoite-expressed protein	TGME49_202390	61797	1	2.39			1	1505.81
TGME49_295320-t26_1-p1	embryo sac development arrest EDA7, putative	TGME49_295320	69302	2	4.31			1	1504.58
TGME49_203600-t26_1-p1	hypothetical protein	TGME49_203600	47215	1	2.51							1	1502.98
TGME49_202950-t26_1-p1	hypothetical protein	TGME49_202950	151800	1	0.71	1	1500.76
TGME49_257990-t26_1-p1	heat shock protein 101, putative	TGME49_257990	104297	1	1.51	1	1491.31
TGME49_226730-t26_1-p1	aconitate hydratase ACN/IRP	TGME49_226730	114885	1	1.61	1	1486.45
TGME49_316340-t26_1-p1	hypothetical protein	TGME49_316340	26850	1	8.64							1	1478.17
TGME49_294730-t26_1-p1	hypothetical protein	TGME49_294730	217380	1	0.61	1	1453.56
TGME49_233260-t26_1-p1	GTP-binding protein, putative	TGME49_233260	43261	1	2.81	1	1423.67
TGME49_278900-t26_1-p1	protein kinase, putative	TGME49_278900	64043	1	1.67			1	1413.38
TGME49_237520-t26_1-p1	hypothetical protein	TGME49_237520	114771	1	0.87	1	1384.33
TGME49_258070-t26_1-p1	hypothetical protein	TGME49_258070	75742	1	1.62	1	1345.5
TGME49_271820-t26_1-p1	lipoyltransferase and lipoate-protein ligase subfamily protein	TGME49_271820	52465	1	1.68	1	889.51	1	429.697
TGME49_223020-t26_1-p1	coproporphyrinogen III oxidase	TGME49_223020	41677	1	3.57			1	1262.05
TGME49_275802-t26_1-p1	SRP72 RNA-binding domain-containing protein	TGME49_275802	79710	1	1.23	1	1240.03
TGME49_310150-t26_1-p1	AMP-binding enzyme domain-containing protein	TGME49_310150	95937	1	1.15	1	1199.87
TGME49_249270-t26_1-p1	protein disulfide isomerase-related protein (provisional), putative	TGME49_249270	59941	1	2.74	1	1194.47
TGME49_243710-t26_1-p1	t-complex protein beta subunit	TGME49_243710	61473	1	2.11	1	1159.2
TGME49_254500-t26_1-p1	hypothetical protein	TGME49_254500	60687	1	2.9			1	1083.84
TGME49_231140-t26_1-p1	ribosomal protein RPS25	TGME49_231140	18682	1	9.32											1	1016.52
TGME49_215560-t26_1-p1	histone arginine methyltransferase PRMT5	TGME49_215560	107092	1	1.43	1	964.936
TGME49_319350-t26_1-p1	SAG-related sequence SRS17B	TGME49_319350	39375	1	3.69									1	954.124
TGME49_289330-t26_1-p1	ubiquitin carboxyl-terminal hydrolase family 2 protein	TGME49_289330	248338	1	0.48									1	949.236
TGME49_290950-t26_1-p1	clathrin heavy chain, putative	TGME49_290950	194503	1	0.75	1	902.269
TGME49_292220-t26_1-p1	PCI domain-containing protein	TGME49_292220	61440	1	2.51			1	878.546
TGME49_213900-t26_1-p1	regulator of chromosome condensation RCC1	TGME49_213900	122605	1	1.13	1	833.796
TGME49_226830-t26_1-p1	DnaK family protein	TGME49_226830	103193	1	1.17	1	819.171
TGME49_320690-t26_1-p1	gamma-soluble NSF attachment protein, putative	TGME49_320690	44558	1	1.97									1	811.473
TGME49_240650-t26_1-p1	coatomer protein complex, subunit alpha, putative	TGME49_240650	142954	1	0.85	1	807.331
TGME49_226590-t26_1-p1	cytochrome C oxidase subunit IIa, putative	TGME49_226590	34503	1	3.68													1	778.301
TGME49_254690-t26_1-p1	phospholipase/carboxylesterase	TGME49_254690	54236	1	2.01					1	747.72
TGME49_281630-t26_1-p1	hydroxyacylglutathione hydrolase	TGME49_281630	48165	1	3.78									1	722.072
TGME49_215590-t26_1-p1	flavoprotein subunit of succinate dehydrogenase	TGME49_215590	72751	1	3.14	1	703.81
TGME49_243960-t26_1-p1	nuclear transport factor 2 (ntf2) domain-containing protein	TGME49_243960	84196	2	5.14			1	624.686
TGME49_258210-t26_1-p1	DNA-directed RNA polymerase II RPB2	TGME49_258210	140951	1	0.79	1	623.738
TGME49_282090-t26_1-p1	hypothetical protein	TGME49_282090	60527	1	2.77	1	554.325
TGME49_249680-t26_1-p1	RNA polymerase II associated Paf1 complex component PAF1	TGME49_249680	61780	1	3.11			1	552.224
TGME49_248130-t26_1-p1	hypothetical protein	TGME49_248130	93453	1	1.39	1	546.871
TGME49_305270-t26_1-p1	hypothetical protein	TGME49_305270	82315	1	1.63			1	527.62
TGME49_225860-t26_1-p1	hypothetical protein	TGME49_225860	111619	1	1.42	1	509.372
TGME49_226380-t26_1-p1	hypothetical protein	TGME49_226380	42612	1	4.5									1	468.406
TGME49_280560-t26_1-p1	selenide, water dikinase	TGME49_280560	137875	1	0.85	1	451.326
TGME49_278870-t26_1-p1	myosin F	TGME49_278870	216398	1	0.56									1	357.939
TGME49_203370-t26_1-p1	hypothetical protein	TGME49_203370	81062	1	1.42
TGME49_205220-t26_1-p1	U5 snRNP-associated subunit, putative	TGME49_205220	122775	1	1.17
TGME49_209690-t26_1-p1	small nuclear ribonucleoprotein	TGME49_209690	24897	1	4.72
TGME49_212950-t26_1-p1	ADP-ribosylation factor family protein 2, putative	TGME49_212950	21033	1	5.95
TGME49_220610-t26_1-p1	protein phosphatase 2C domain-containing protein	TGME49_220610	58057	1	2.74
TGME49_222210-t26_1-p1	SPFH domain / Band 7 family protein	TGME49_222210	47492	1	2.27
TGME49_222300-t26_1-p1	hypothetical protein	TGME49_222300	159728	1	0.68
TGME49_223040-t26_1-p1	hypothetical protein	TGME49_223040	27437	1	3.35
TGME49_224060-t26_1-p1	thioredoxin, putative	TGME49_224060	68948	1	1.93
TGME49_225990-t26_1-p1	acyl transferase domain-containing protein	TGME49_225990	53257	1	1.99
TGME49_226720-t26_1-p1	translin family protein	TGME49_226720	31274	1	5.86
TGME49_226980-t26_1-p1	hypothetical protein	TGME49_226980	25353	1	6.61
TGME49_237220-t26_1-p1	DNA replication licensing factor Mcm7, putative	TGME49_237220	96875	1	1.27
TGME49_244200-t26_1-p1	2-oxoglutarate dehydrogenase e1 component, mitochondrial precursor, putative	TGME49_244200	124265	1	0.81
TGME49_248700-t26_1-p1	alveolin domain containing intermediate filament IMC12	TGME49_248700	29762	1	4.33
TGME49_254220-t26_1-p1	hypothetical protein	TGME49_254220	84221	1	2.06
TGME49_254420-t26_1-p1	phospholipase, patatin family protein	TGME49_254420	127354	1	0.77
TGME49_257040-t26_1-p1	TB2/DP1, HVA22 family protein	TGME49_257040	24052	1	5.99
TGME49_257350-t26_1-p1	eukaryotic translation initiation factor, putative	TGME49_257350	89776	1	1.22
TGME49_257480-t26_1-p1	NADP-dependent succinate-semialdehyde dehydrogenase	TGME49_257480	75884	1	2.12
TGME49_260670-t26_1-p1	centrin, putative	TGME49_260670	26582	1	7.14
TGME49_262050-t26_1-p1	rhoptry kinase family protein ROP39	TGME49_262050	65132	1	1.53
TGME49_270070-t26_1-p1	synaptobrevin family protein	TGME49_270070	25625	1	3.56
TGME49_287970-t26_1-p1	hypothetical protein	TGME49_287970	249802	1	0.35
TGME49_293810-t26_1-p1	carboxyvinyl-carboxyphosphonate phosphorylmutase	TGME49_293810	39923	1	2.98
TGME49_295360-t26_1-p1	hypothetical protein	TGME49_295360	29550	1	3.36
TGME49_297880-t26_1-p1	dense granule protein DG32	TGME49_297880	24153	1	6.39
TGME49_301390-t26_1-p1	ribosome biogenesis protein BOP1, putative	TGME49_301390	117373	1	1.43
TGME49_306060-t26_1-p1	rhoptry neck protein RON8	TGME49_306060	328900	1	0.4
TGME49_311500-t26_1-p1	ThiF family protein	TGME49_311500	93425	1	0.95
TGME49_312618-t26_1-p1	hypothetical protein	TGME49_312618	59251	1	2.24
TGME49_318260-t26_1-p1	transcription initiation factor TFIID subunit TAF5	TGME49_318260	117949	1	1.37
A0A075B6Z2_HUMAN	T cell receptor alpha joining 56 (Fragment)	TRAJ56	2220	1	38.1					1	143825840
A0A5C2G1L1_HUMAN	IGL c3022_light_IGKV2D-29_IGKJ2 (Fragment)		11978	3	20.91	2	7.29853e+06	2	647846	1	324754	2	294040	1	118770	1	82625.2	3	5.94766e+06
L0R5A1_HUMAN	Alternative protein CSF2RB	CSF2RB	11646	1	7.41	1	1.313e+07											1	125029
B4DGK4_HUMAN	Alternative protein SYT7	SYT7	13173	1	6.56					1	987134	1	1.08547e+06	1	932989	1	1.09344e+06
A0A5C2G6R6_HUMAN	IGL c2123_light_IGKV2D-24_IGKJ1 (Fragment)		12138	2	14.29	1	1.22504e+06			1	138213					1	51413.5	2	1.78775e+06
A0A024R5Z7_HUMAN	Annexin	ANXA2	38604	30	63.13	6	147488	9	207905	4	72685.9	29	2.67918e+06	8	83202.6
BIP_HUMAN	Endoplasmic reticulum chaperone BiP	HSPA5	72333	36	41.74	10	178261	35	2.63159e+06
ANXA5_HUMAN	Annexin A5	ANXA5	35937	20	57.81	1	22600.9	1	16045.3	2	18147.5	3	32866.4	20	2.16143e+06
E9PKE3_HUMAN	Heat shock cognate 71 kDa protein	HSPA8	68806	12	21.21	5	480098	12	1.22074e+06
A0A0G2JIW1_HUMAN	Heat shock 70 kDa protein 1B	HSPA1B	70109	5	10.59	3	519229	5	1.03758e+06
B0YJC4_HUMAN	Vimentin	VIM	49653	17	42.23	2	9833.2	1	3566.55	17	1.30333e+06	2	5986.64	1	2133.7	2	4610.23	2	6179.64
A0A024R0H7_HUMAN	Testis tissue sperm-binding protein Li 44a	WDR77	36724	8	27.49	2	98256.5	2	15065	2	46564.5	8	576421	3	155392
PPIB_HUMAN	Peptidyl-prolyl cis-trans isomerase B	PPIB	23743	9	44.44													8	867961
ANXA1_HUMAN	Annexin A1	ANXA1	38714	20	52.02	1	1862.63	1	3117.3	1	3045.92	18	499180	11	264677
ACTBL_HUMAN	Beta-actin-like protein 2	ACTBL2	42003	3	11.17	2	115887	2	319077	2	226761	1	18517.3
B0YJA4_HUMAN	Thy-1 antigen	THY1	17935	5	26.71							2	78388.7	5	591312
A0A384NL29_HUMAN	Superoxide dismutase		24750	6	38.74													5	669058
H7BZJ3_HUMAN	Protein disulfide-isomerase A3 (Fragment)	PDIA3	13519	5	40.65	1	42036.2	2	61250.2	5	484505
ACTG_HUMAN	Actin, cytoplasmic 2	ACTG1	41793	9	33.87	5	223250	5	176516	5	108665	3	42593.1	2	31563.3
L8E7T1_HUMAN	Alternative protein SOX11	SOX11	5981	1	42					1	543533
H12_HUMAN	Histone H1.2	H1-2	21365	9	30.99									8	349139	6	102775	5	84243.3
H15_HUMAN	Histone H1.5	H1-5	22580	8	26.99									7	400640	3	46436.3	2	56927.5
Q9H7M3_HUMAN	FLJ00047 protein (Fragment)	FLJ00047	9327	1	9.88			1	477848
C9JNW5_HUMAN	60S ribosomal protein L24	RPL24	17543	6	23.33													6	414405
ATPB_HUMAN	ATP synthase subunit beta, mitochondrial	ATP5F1B	56560	11	26.84					10	410743
LDHA_HUMAN	L-lactate dehydrogenase A chain	LDHA	36689	9	32.23									8	383609
G3P_HUMAN	Glyceraldehyde-3-phosphate dehydrogenase	GAPDH	36053	8	29.25	3	38230.9	2	17501.2	1	3630.57	7	293999	2	16060.5
Q5U0I6_HUMAN	H.sapiens ras-related Hrab1A protein	RAB1A	22678	3	16.59	1	12032.9					1	3934.15					3	337840
B3KQ76_HUMAN	cDNA FLJ33025 fis, clone THYMU1000558, highly similar to Homo sapiens SEC22 vesicle trafficking protein-like 2 (S. cerevisiae) (SEC22L2), mRNA		34976	1	3.26					1	329180
B4DHR1_HUMAN	cDNA FLJ53009, highly similar to Calreticulin		24287	7	37.74					7	282302
B3KRY5_HUMAN	cDNA FLJ35087 fis, clone PLACE6005546, highly similar to Polymerase I and transcript release factor		39045	3	6.67					2	188840			1	36018.7			2	43987.8
ANM5_HUMAN	Protein arginine N-methyltransferase 5	PRMT5	72684	7	14.29	5	79429.2	6	147802
ENPL_HUMAN	Endoplasmin	HSP90B1	92469	7	11.58	7	210905	1	12615.3
B4DQF8_HUMAN	Lysyl oxidase homolog		42437	4	7.43					2	29017.1					1	5870.8	3	174862
A0A024R8S5_HUMAN	Protein disulfide-isomerase	P4HB	57116	11	23.62	7	143296	1	2112.86	5	54665.1
A0A024R5Z8_HUMAN	RAB11A, member RAS oncogene family, isoform CRA_a	RAB11A	24394	5	26.39													5	199201
Q5SU16_HUMAN	Tubulin beta chain	TUBB	49671	8	18.69	7	116027	2	20606	3	57836.4
A0A024RD18_HUMAN	Serine/threonine kinase 38, isoform CRA_a	STK38	54190	7	16.77					7	191098
A0A024QZD1_HUMAN	Ribosomal protein L18, isoform CRA_c	RPL18	21634	2	13.83			1	8762.36									2	181386
A0A5F9ZHM4_HUMAN	L-lactate dehydrogenase	LDHB	37404	4	13.2									4	189089
A0A024R845_HUMAN	Ras-related protein Rab-14	RAB14	23897	3	12.09							1	4425.92					2	182853
B3KQT9_HUMAN	Protein disulfide-isomerase		54102	9	20.62	2	24145	1	11732	8	143499
PGS2_HUMAN	Decorin	DCN	39747	4	13.09			4	171688
CAVN3_HUMAN	Caveolae-associated protein 3	CAVIN3	27701	3	15.33							3	165193
A0A087X054_HUMAN	Hypoxia up-regulated protein 1	HYOU1	104779	9	9.93	9	162882
A0PJ62_HUMAN	60S ribosomal protein L14 (Fragment)	RPL14	14611	2	18.55									1	3719.03	2	158949
A0A024R7V6_HUMAN	RAB2, member RAS oncogene family, isoform CRA_a	RAB2	23546	3	15.57													3	149402
A0A286YEY4_HUMAN	Immunoglobulin heavy constant gamma 2 (Fragment)	IGHG2	43806	1	2.28	1	130082
A0A2R8Y4A2_HUMAN	60S ribosomal protein L5	RPL5	20135	3	18.82							1	11456	3	117909
A0A024R5K8_HUMAN	Collagen-binding protein	SERPINH1	46441	4	12.44	3	55351.1	2	28408.5	2	34081.7					1	4629.21	1	4646.27
A8K4C8_HUMAN	60S ribosomal protein L13	RPL13	24261	5	18.96									1	7357.78	4	119152
B4DXN0_HUMAN	Major vault protein		92778	8	10.9	8	119401
H7C263_HUMAN	DNA repair protein REV1 (Fragment)	REV1	10607	1	13.4	1	107032
A0A590UJJ6_HUMAN	Histone H3	H3-3A	13655	1	5.83									1	98034.7
A0A024R4K3_HUMAN	Malate dehydrogenase	MDH2	35503	9	31.07									8	92412.6
A8MX94_HUMAN	GST class-pi	GSTP1	19480	3	21.26													2	91831.8
A0A024RBS2_HUMAN	60S acidic ribosomal protein P0	RPLP0	34274	3	11.04							2	62720.8	2	28897.5
B7Z865_HUMAN	cDNA FLJ50929, highly similar to EGF-like repeat and discoidin I-likedomain-containing protein 3		18079	1	6.96													1	91389.2
1433T_HUMAN	14-3-3 protein theta	YWHAQ	27764	4	16.73			1	30167			1	41936.4	1	1806.62	2	15870.9
A0A1Z1VXF2_HUMAN	CD44 antigen (Fragment)	CD44	21862	2	11.06			1	88731.2
FBLN1_HUMAN	Fibulin-1	FBLN1	77214	6	10.81	1	5495.03	6	82591.3
A0A024R1N1_HUMAN	Myosin, heavy polypeptide 9, non-muscle, isoform CRA_a	MYH9	226532	20	12.65	16	77174.3	8	9482.43									1	331.244
A0A024R882_HUMAN	Stomatin, isoform CRA_a	STOM	31731	3	12.5											2	86974.3
B7Z6T9_HUMAN	cDNA FLJ50237, highly similar to Homo sapiens fibulin 2 (FBLN2), transcript variant 1, mRNA		57567	7	17.27	7	86279.5
A0A0S2Z2Z6_HUMAN	Annexin (Fragment)	ANXA6	75873	10	16.79	1	2706.16	10	81365.5			1	1308.5
A0A024R326_HUMAN	60S ribosomal protein L29	RPL29	17553	2	10.19	1	30939.5					1	11578.8			1	3621.24	1	36900.9
A0A024RC61_HUMAN	Aminopeptidase	ANPEP	109540	9	10.75	9	78300.4
B7Z9B8_HUMAN	cDNA FLJ56912, highly similar to Fibulin-2		129384	8	8.26	8	76131.1
A0A2R8Y5Y7_HUMAN	60S ribosomal protein L9	RPL9	25057	3	15.91													3	73468.5
B1AHL2_HUMAN	Fibulin-1	FBLN1	78329	4	8.04	1	5342.39	4	62152.2
Q08ES8_HUMAN	60S ribosomal protein L11		20094	1	7.91													1	65762.4
MOES_HUMAN	Moesin	MSN	67820	5	7.45			5	61664.9
A8K0T9_HUMAN	F-actin-capping protein subunit alpha		32909	3	14.69							2	26477.4	2	34508.4
PLBL2_HUMAN	Putative phospholipase B-like 2	PLBD2	65472	4	8.32							3	26864.6			1	22496.6	1	9600.12
A4D0V4_HUMAN	F-actin-capping protein subunit alpha	CAPZA2	32949	2	8.39							1	12351.7	2	45105.8
A0A024R2L6_HUMAN	40S ribosomal protein SA	RPSA	32854	2	10.17							2	54560.3
DPP2_HUMAN	Dipeptidyl peptidase 2	DPP7	54341	3	8.74					2	54346.8
A8K4W0_HUMAN	40S ribosomal protein S3a	RPS3A	29955	3	9.09									3	50786.6
B4DUI5_HUMAN	Triosephosphate isomerase		22871	2	11.74											2	50274.2
E9KL35_HUMAN	Epididymis tissue sperm binding protein Li 3a		35077	4	15.14									4	47807.3
A0A3B3IUD5_HUMAN	Glutaminyl-peptide cyclotransferase (Fragment)	QPCT	15723	2	18.25							2	44810.2	1	2451.82
ALDOA_HUMAN	Fructose-bisphosphate aldolase A	ALDOA	39420	4	16.21							3	46276.3
ERP29_HUMAN	Endoplasmic reticulum resident protein 29	ERP29	28993	2	9.58											2	45629.8
A0A024RBK3_HUMAN	60S ribosomal protein L6	RPL6	32728	2	7.29							2	44711.2
A0A090N8Y2_HUMAN	Protein disulfide-isomerase A4	ERP70	72932	6	11.16			6	41864.7
A1MMZ2_HUMAN	Uncharacterized protein	FLJ23235	34323	1	3.04	1	40147.6
P4HA1_HUMAN	Prolyl 4-hydroxylase subunit alpha-1	P4HA1	61049	2	4.49	2	30589.1			1	8193.16
AL1A1_HUMAN	Retinal dehydrogenase 1	ALDH1A1	54862	3	8.18	1	1378.44			3	37182.9
I3L2I6_HUMAN	N-sulphoglucosamine sulphohydrolase (Fragment)	SGSH	11415	1	11.32					1	38415.6
HP1B3_HUMAN	Heterochromatin protein 1-binding protein 3	HP1BP3	61207	7	13.38			6	38078.6
P4HA2_HUMAN	Prolyl 4-hydroxylase subunit alpha-2	P4HA2	60902	4	9.35	4	36663.1			1	1173.1
A0A024R592_HUMAN	Glucosidase, alpha neutral AB, isoform CRA_b	GANAB	96189	2	2.48	2	37563.3
PGAM1_HUMAN	Phosphoglycerate mutase 1	PGAM1	28804	4	14.57											4	37557.8
MYH10_HUMAN	Myosin-10	MYH10	228999	12	7.19	10	36318.5	1	899.257
GT251_HUMAN	Procollagen galactosyltransferase 1	COLGALT1	71636	3	5.31	1	4377.67	2	29092.4
E9PK01_HUMAN	Elongation factor 1-delta (Fragment)	EEF1D	28821	3	17.62									3	33163.5
Q5JR94_HUMAN	40S ribosomal protein S8	RPS8	24205	2	13.46											2	32725.3
A0A024R9B8_HUMAN	Carboxypeptidase Q	PGCP	51888	3	6.36					2	32723.7
B3KP42_HUMAN	DNA repair-scaffolding protein	SPIDR	42771	1	1.79							1	9673.75			1	11871.6	1	9942.87
G3V1B3_HUMAN	60S ribosomal protein L21	RPL21	9887	1	17.24													1	30947.3
A0A6Q8PF43_HUMAN	Heat shock protein beta-1	HSPB1	15908	1	7.09											1	22421.2	1	7937.61
A0A024QZV0_HUMAN	Epididymis secretory sperm binding protein	hCG_1811539	36178	2	8.02	1	7527.21			1	21791.3
A0A087X2D0_HUMAN	Serine/arginine-rich-splicing factor 3	SRSF3	10321	1	9.47													1	28377.7
A0A087WYS6_HUMAN	Proteasome (Prosome, macropain) subunit, alpha type, 8, isoform CRA_b	PSMA8	25041	2	11.16											2	27458.8
A0A024R5C4_HUMAN	Reticulon	RTN3	25609	1	4.66													1	27408.4
B7Z3Y2_HUMAN	cDNA FLJ51879, highly similar to Prenylcysteine oxidase		48375	1	2.11					1	26672.7
A0A384MTL2_HUMAN	Transgelin		22391	1	5.53													1	26560.7
RL10A_HUMAN	60S ribosomal protein L10a	RPL10A	24831	2	9.68											2	26539.8
J3QRS3_HUMAN	Myosin regulatory light chain 12A	MYL12A	20457	1	5.65					1	11893.8			1	5392.25			1	8430.32
H0YAP6_HUMAN	Lysyl oxidase homolog 2 (Fragment)	LOXL2	7945	1	17.91			1	25674.5
A0A024R4Q8_HUMAN	Ribosomal protein S5, isoform CRA_a	RPS5	22876	2	6.86													2	25504.7
A0A384MQX1_HUMAN	Epididymis secretory sperm binding protein		74139	6	12.05	1	3775.56	5	21721.7
J3QRC4_HUMAN	60S ribosomal protein L26 (Fragment)	RPL26	15750	2	14.07													1	25146.2
A0A024R4M0_HUMAN	40S ribosomal protein S9	RPS9	22591	1	4.64													1	25142.4
COIA1_HUMAN	Collagen alpha-1(XVIII) chain	COL18A1	178188	4	2.62			3	20943.2	1	3514.9
CATZ_HUMAN	Cathepsin Z	CTSZ	33868	2	7.26											2	23337
A0A087WY74_HUMAN	Casein kinase II subunit alpha (Fragment)	CSNK2A1	13759	1	5.93											1	22711.2
A6XAA7_HUMAN	Gremlin	GREM1	20697	1	7.07													1	20921.9
A0A384P5S0_HUMAN	Epididymis secretory sperm binding protein		49398	2	5.13					2	20795.6
A0A140VJU8_HUMAN	Superoxide dismutase [Cu-Zn]		25851	1	3.33											1	19852.4
A0A024R2Q4_HUMAN	Ribosomal protein L15	RPL15	24146	1	4.41											1	18313.6
K7ELI9_HUMAN	Stromal cell-derived factor 2 (Fragment)	SDF2	11290	1	23.08													1	17474.9
A8MUS3_HUMAN	60S ribosomal protein L23a	RPL23A	21916	1	4.64													1	17086.8
M0QYS1_HUMAN	60S ribosomal protein L13a (Fragment)	RPL13A	24215	2	10.95											1	1113.55	2	15501.1
A0A087X0S5_HUMAN	Collagen alpha-1(VI) chain	COL6A1	108339	3	4.29	3	16238.2
A0A024R374_HUMAN	Cathepsin B	CTSB	37822	1	2.36											1	16140.1
H1X_HUMAN	Histone H1.10	H1-10	22487	1	5.63											1	15830.2
ATPA_HUMAN	ATP synthase subunit alpha, mitochondrial	ATP5F1A	59751	4	9.4					2	15441.3
F8W914_HUMAN	Reticulon	RTN4	37145	1	3.77							1	14838.5
A0A384NPU5_HUMAN	Epididymis secretory sperm binding protein		48121	3	8.18	3	13843.2	1	857.668
A0A024R1W3_HUMAN	Peptidylprolyl isomerase	FKBP10	64245	2	3.61	1	2062.61	1	12317.7
A0A024R5H8_HUMAN	RAB6A, member RAS oncogene family, isoform CRA_b	RAB6A	23549	2	11.54													1	14201
B2R4C0_HUMAN	60S ribosomal protein L18a		20752	1	7.39													1	14125.3
ANXA3_HUMAN	Annexin A3	ANXA3	36375	3	10.84									3	13626.3
A0A384MTR2_HUMAN	Epididymis secretory sperm binding protein	PRDX3	27693	1	5.47							1	8469.93	1	4866.3
B3KQF4_HUMAN	Metalloproteinase inhibitor 1		23181	1	5.8											1	13299.7
A0A024RB31_HUMAN	Myosin, light polypeptide 6B, alkali, smooth muscle and non-muscle, isoform CRA_a	MYL6B	22764	1	6.25									1	12659.1
A0A024R5Z9_HUMAN	Pyruvate kinase	PKM2	58062	1	2.45	1	8367.15	1	3427.16
A0A024RBT2_HUMAN	Diablo homolog, mitochondrial	DIABLO	18919	1	6.02													1	11534.1
A8K9A4_HUMAN	cDNA FLJ75154, highly similar to Homo sapiens heterogeneous nuclear ribonucleoprotein C (C1/C2), mRNA		33612	2	7.19							2	10857.5
A0A0D9SFB0_HUMAN	Four and a half LIM domains protein 1 (Fragment)	FHL1	17438	2	15.13									2	10648
A0A140VK39_HUMAN	Protein phosphatase methylesterase 1		42315	1	1.81													1	10609.7
A8K2Q6_HUMAN	Peptidyl-prolyl cis-trans isomerase		22717	1	6.13													1	10517.6
B2R5M9_HUMAN	Procollagen-lysine 5-dioxygenase		83504	3	5.36			3	10338.8
A0A024RDY3_HUMAN	Lysosomal-associated membrane protein 1, isoform CRA_a	LAMP1	44882	1	2.64	1	10265.9
RS7_HUMAN	40S ribosomal protein S7	RPS7	22127	2	13.92													2	10209
A0A1B0GU03_HUMAN	Peptidase A1 domain-containing protein		62702	2	1.89											2	9720.96
B4DMF5_HUMAN	Glutamate dehydrogenase		56603	2	4.72					2	9448.14
A0A140VKF2_HUMAN	26S proteasome regulatory subunit RPN11		34577	1	4.19									1	9233.78
A0A3B3IRL3_HUMAN	cAMP and cAMP-inhibited cGMP 3',5'-cyclic phosphodiesterase 10A (Fragment)	PDE10A	7058	1	16.67													1	9146.59
A0A494BZT7_HUMAN	Dystonia 1 protein	TOR1A	34207	3	7.3									3	8694.77
A0A024R1U4_HUMAN	RAB5C, member RAS oncogene family, isoform CRA_a	RAB5C	23483	1	5.56													1	8660.09
A0A140VK44_HUMAN	Proteasome subunit alpha type		27399	2	8.94											1	8444.47
MOB2_HUMAN	MOB kinase activator 2	MOB2	26927	3	10.97											2	8401.54
A0A024R7F1_HUMAN	Glucosidase 2 subunit beta	PRKCSH	59296	2	3.98			1	8281.7
H0YCU9_HUMAN	Transgelin (Fragment)	TAGLN	16843	1	7.95													1	8196.07
A0A0X9TDD0_HUMAN	GCT-A1 light chain variable region (Fragment)		12436	1	7.96													1	7975.23
B7Z5H9_HUMAN	Acid beta-galactosidase		60552	2	5.49	2	6734.94	1	1208.42
A0A024RBC5_HUMAN	N-acetylglucosamine-6-sulfatase	GNS	62082	1	2.17							1	3636.74	1	4205.35
LOXL4_HUMAN	Lysyl oxidase homolog 4	LOXL4	84483	2	3.7			2	7583.81
H0YEL4_HUMAN	Polycomb protein EED (Fragment)	EED	13075	1	16.52	1	7503.15
B4DHG3_HUMAN	Procollagen-lysine 5-dioxygenase		81140	2	3.41	2	7473.49
D3DS95_HUMAN	HCG21173, isoform CRA_a	hCG_21173	10123	1	17.02													1	7283.49
A0A384NKJ3_HUMAN	Epididymis secretory sperm binding protein		32816	2	6.95											2	7279.6
LRRK2_HUMAN	Leucine-rich repeat serine/threonine-protein kinase 2	LRRK2	286103	1	0.55			1	7185.42
A0A087WZP6_HUMAN	Nidogen-2	NID2	107043	2	2.89	2	7129.75
5NTD_HUMAN	5'-nucleotidase	NT5E	63368	1	2.26			1	6702.69
P3H1_HUMAN	Prolyl 3-hydroxylase 1	P3H1	83394	2	2.72	1	547.226	2	5669.31
MESD_HUMAN	LRP chaperone MESD	MESD	26077	2	11.11											1	6194.88
B2R491_HUMAN	40S ribosomal protein S4	RPS4X	29598	1	3.42											1	6159.94
B2R983_HUMAN	Glutathione-dependent dehydroascorbate reductase		27539	1	7.47											1	5790.3
ARPC2_HUMAN	Actin-related protein 2/3 complex subunit 2	ARPC2	34333	1	3									1	5705.06
ARPC3_HUMAN	Actin-related protein 2/3 complex subunit 3	ARPC3	20547	1	6.18													1	5319.79
A0A024R3W7_HUMAN	Elongation factor 1-beta	EEF1B2	24764	1	5.78											1	5176.14
A0A384P5K2_HUMAN	Epididymis secretory sperm binding protein		20567	1	7.77													1	5160.95
B3KM36_HUMAN	cDNA FLJ10153 fis, clone HEMBA1003417, highly similar to BAG family molecular chaperone regulator 2		23712	1	5.21													1	5013.57
A0A0B4J259_HUMAN	1,4-beta-N-acetylmuramidase C	LYZ	15329	1	8.76													1	4784.98
Q86U75_HUMAN	Dihydropyrimidinase-related protein 2		67017	1	3.23													1	4714.29
A8KAK1_HUMAN	cDNA FLJ77398, highly similar to Homo sapiens UDP-glucose ceramide glucosyltransferase-like 1, transcript variant 2, mRNA		175007	2	1.37	1	4625.33
F5H053_HUMAN	Phospholipase B-like (Fragment)	PLBD1	16532	1	6.94													1	4558.47
A0A024R509_HUMAN	Arylsulfatase A, isoform CRA_a	ARSA	53792	2	6.09					2	4533.79
A0A024R451_HUMAN	Serpin peptidase inhibitor, clade E (Nexin, plasminogen activator inhibitor type 1), member 2, isoform CRA_a	SERPINE2	44002	1	2.51	1	4496.92
A0A5K1VW95_HUMAN	Malate dehydrogenase	MDH1	38618	1	4.82									1	3782.35
A0A286YF22_HUMAN	D-3-phosphoglycerate dehydrogenase	PHGDH	55939	1	1.52					1	3704.33
B4DHB3_HUMAN	Phosphoglycerate kinase		29992	1	3.91	1	3603.9
A0A0C4DGN4_HUMAN	Zymogen granule protein 16 homolog B	ZG16B	19600	1	5.06											1	3476.26
ANXA4_HUMAN	Annexin A4	ANXA4	35883	1	3.45									1	3384.33
A0A0C4DG44_HUMAN	Serine protease HTRA2, mitochondrial (Fragment)	HTRA2	45113	1	2.84							1	3196.47
ANXA7_HUMAN	Annexin A7	ANXA7	52739	1	1.84							1	3150.15
MXRA5_HUMAN	Matrix-remodeling-associated protein 5	MXRA5	312150	2	0.71	2	3019.81
A0A1W2PPH1_HUMAN	Malic enzyme	ME2	61222	1	2.01					1	2903.82
A0A140VK56_HUMAN	Transaldolase		37540	1	3.86							1	2805.5
B3KNK5_HUMAN	cDNA FLJ14795 fis, clone NT2RP4001219, highly similar to Homo sapiens DnaJ (Hsp40) homolog, subfamily C, member 10 (DNAJC10), mRNA		68965	1	1.66	1	2686.61
A0A384NYH9_HUMAN	Alpha-mannosidase		113889	1	0.99					1	2423.18
A4D2J0_HUMAN	SNARE protein Ykt6	YKT6	22418	1	6.57													1	2131.99
A0A024RCJ8_HUMAN	HCG1821276, isoform CRA_a	hCG_1821276	67943	1	1.47									1	2119.74
B2RD36_HUMAN	Carboxymethylenebutenolidase homolog		28058	1	4.9											1	2000.86
B7ZW00_HUMAN	COL6A3 protein	COL6A3	278211	2	0.97	2	1829.12
A8K335_HUMAN	Folate gamma-glutamyl hydrolase		36047	2	9.12							2	1720.47
ERO1A_HUMAN	ERO1-like protein alpha	ERO1A	54393	1	2.56					1	1184.32
A0A024RAM4_HUMAN	Microtubule-associated protein 1B, isoform CRA_b	MAP1B	270620	1	0.41									1	1164.51
A0A075B749_HUMAN	Myomegalin	PDE4DIP	280468	1	0.28													1	1072.91
A0A024R814_HUMAN	Ribosomal protein L7, isoform CRA_a	RPL7	30438	1	5.41											1	886.128
A0A024R462_HUMAN	Fibronectin	FN1	259211	1	0.55	1	810.987
A0A024RA55_HUMAN	Glycoprotein (Transmembrane) nmb, isoform CRA_b	GPNMB	62643	1	3.21					1	690.435
B7Z4R3_HUMAN	CCT-beta		50944	1	2.53					1	683.709
A5YM53_HUMAN	ITGAV protein	ITGAV	116105	1	1.34	1	466.903
A0A024R694_HUMAN	Alpha-actinin cytoskeletal isoform	ACTN1	103058	1	1.35	1	444.546
A0A087WWY3_HUMAN	Filamin-A	FLNA	245851	1	0.82					1	256.887
A0A024RDH2_HUMAN	Ubiquitin-conjugating enzyme E2D 3 (UBC4/5 homolog, yeast), isoform CRA_a	UBE2D3	16687	1	5.44
A0A024R713_HUMAN	Dihydrolipoyl dehydrogenase	DLD	54177	1	2.75
A0A140VK45_HUMAN	Proteasome subunit beta		26489	1	5.81
A0A384N6H6_HUMAN	Septin-2		42685	1	4.58
A0A3B3IUB9_HUMAN	Baculoviral IAP repeat-containing protein 6 (Fragment)	BIRC6	419140	1	0.26
B5MDF5_HUMAN	GTP-binding nuclear protein Ran	RAN	26224	1	4.72
K7EK06_HUMAN	Phenylalanine--tRNA ligase alpha subunit (Fragment)	FARSA	18389	1	6.55
PIP_HUMAN	Prolactin-inducible protein	PIP	16572	1	6.85

## Sheet: PAP-data
accession	protein name	gene name	molecular weight	identified peptides	coverage	PAP-Band1		PAP-Band2		PAP-Band3		PAP-Band4		PAP-Band5		PAP-Band6		PAP-Band7		PAP-Band8
						quantified peptides count	iBAQ	quantified peptides count	iBAQ	quantified peptides count	iBAQ	quantified peptides count	iBAQ	quantified peptides count	iBAQ	quantified peptides count	iBAQ	quantified peptides count	iBAQ	quantified peptides count	iBAQ
TGME49_226080-t26_1-p1	polyA polymerase	TGME49_226080	87169	42	44.39	13	861938	19	1.25776e+06	16	2.58174e+06	37	5.99434e+07	26	7.24977e+06	2	29048.5	1	2167.49
TGME49_247330-t26_1-p1	hypothetical protein	TGME49_247330	204455	12	8.83	9	13353.5	9	17925.2
TGME49_219440-t26_1-p1	hypothetical protein	TGME49_219440	181402	6	4.75			6	17399.8
TGME49_230010-t26_1-p1	hypothetical protein	TGME49_230010	140376	3	2.47					3	13753.9
TGME49_285200-t26_1-p1	cleavage and polyadenylation specifity factor protein	TGME49_285200	116743	3	3.08					2	10791.2
TGME49_294700-t26_1-p1	polynucleotide 5'-hydroxyl-kinase	TGME49_294700	73663	1	2.91									1	4533.87
TGME49_224280-t26_1-p1	CPSF A subunit region protein	TGME49_224280	301891	1	0.32	1	434.221
TGME49_286420-t26_1-p1	elongation factor 1-alpha (EF-1-ALPHA), putative	TGME49_286420	49006	27	49.11	2	43092.7	3	40362.5	3	139128	2	284879	1	29706.9	26	4.30732e+07	1	2492.7
TGME49_273760-t26_1-p1	heat shock protein HSP70	TGME49_273760	72880	40	48.07	5	64292.1	6	80048.7	9	263854	7	279156	37	2.30544e+07
TGME49_311720-t26_1-p1	chaperonin protein BiP	TGME49_311720	73253	39	53.14					2	22341.8	1	11396.7	37	2.05264e+07
TGME49_261240-t26_1-p1	histone H3	TGME49_261240	15402	8	38.24					1	642814									8	1.82246e+07
TGME49_220400-t26_1-p1	actin depolymerizing factor ADF	TGME49_220400	12922	12	64.41															12	1.48982e+07
TGME49_211680-t26_1-p1	protein disulfide isomerase	TGME49_211680	52802	27	51.59			1	3720.8	1	11493.1	2	34608.7	1	7800.92	26	1.19968e+07
TGME49_289690-t26_1-p1	glyceraldehyde-3-phosphate dehydrogenase GAPDH1	TGME49_289690	53339	22	34.36			1	6336.66	1	11437.5	3	54527.5	2	22848.6	3	63474.4	22	1.11305e+07
TGME49_226960-t26_1-p1	phosphofructokinase PFKII	TGME49_226960	131362	55	38.61	11	130482	11	147528	52	9.0343e+06	3	7535.82	1	614.023
TGME49_300200-t26_1-p1	histone H2AZ	TGME49_300200	15920	4	23.23															4	6.64286e+06
TGME49_248160-t26_1-p1	hypothetical protein	TGME49_248160	122418	1	0.73	1	5.79855e+06
TGME49_266960-t26_1-p1	beta tubulin	TGME49_266960	50073	26	46.99	1	4170.05	1	4769.19			2	56464.7	1	20068.3	25	5.63261e+06	1	3279.58
TGME49_293690-t26_1-p1	profilin PRF	TGME49_293690	17741	4	38.18	1	7118.94	1	9957.18	1	42353			2	129275			1	30258.6	4	5.06321e+06
TGME49_316400-t26_1-p1	alpha tubulin TUBA1	TGME49_316400	50114	19	48.34			1	3240.23					2	11461.8	19	5.08174e+06
TGME49_205470-t26_1-p1	translation elongation factor 2 family protein, putative	TGME49_205470	106572	40	44.43	3	15065.4	4	30145.5	2	13405.7	38	4.78432e+06	1	12380.5	2	73592.6	4	14169
TGME49_244560-t26_1-p1	heat shock protein 90, putative	TGME49_244560	96823	40	43.21	2	13227.1	3	9843.07	2	6093.44	38	4.51228e+06
TGME49_259550-t26_1-p1	dihydropteroate synthase	TGME49_259550	82685	19	25.94	1	1219.07	3	22765.2	2	17895.7	1	30675	16	4.27377e+06
TGME49_266640-t26_1-p1	Acetyl-coenzyme A synthetase 2, putative	TGME49_266640	79991	28	44.26	2	7508.18	1	7616.03	5	76803.5	4	80404.2	28	4.01692e+06
TGME49_247510-t26_1-p1	fructose-bisphospatase II	TGME49_247510	42397	23	48.82													23	4.18648e+06
TGME49_273500-t26_1-p1	O-linked N-acetylglucosamine transferase	TGME49_273500	108158	32	36.2	5	40130.3	5	37127.5	8	128653	31	2.91967e+06
TGME49_251780-t26_1-p1	heat shock protein	TGME49_251780	78251	31	46.7									31	3.10658e+06
TGME49_311240-t26_1-p1	DnaJ family chaperone, putative	TGME49_311240	47449	19	26.76							1	5800.23			18	3082920
TGME49_238050-t26_1-p1	nuclease and tudor domain-containing protein	TGME49_238050	104042	38	48.57	2	10488.4	4	21967.4	8	114380	37	2.86585e+06
TGME49_290950-t26_1-p1	clathrin heavy chain, putative	TGME49_290950	194503	94	47.78	28	193323	92	2.7035e+06	1	1457.29
TGME49_220950-t26_1-p1	hypothetical protein	TGME49_220950	38556	2	6.06											2	2.7307e+06
TGME49_273460-t26_1-p1	eukaryotic translation initiation factor 3 subunit 6 interacting protein	TGME49_273460	75074	27	43.82									26	2.69267e+06
TGME49_233220-t26_1-p1	hypothetical protein	TGME49_233220	159704	41	25.75	10	52452.5	10	51319.9	32	1.07871e+06	3	31803.4	24	1.26438e+06	12	181331	3	30660.1
TGME49_214290-t26_1-p1	DJ-1 family protein	TGME49_214290	27939	14	37.11									1	19795.6			4	38273.5	13	2.5862e+06
TGME49_217890-t26_1-p1	alkyl hydroperoxide reductase/ Thiol specific antioxidant/ Mal allergen, putative	TGME49_217890	21722	11	42.86															10	2.53127e+06
TGME49_249780-t26_1-p1	hypothetical protein	TGME49_249780	35575	10	42.38													10	2.15029e+06	5	164651
TGME49_217460-t26_1-p1	glutaminyl-tRNA synthetase (GlnRS)	TGME49_217460	95527	24	30.93							24	2.17818e+06	2	20987.9
TGME49_288360-t26_1-p1	tryptophanyl-tRNA synthetase (TrpRS2)	TGME49_288360	77058	23	33.53	1	2241.27	1	5107.55	1	11304.4	1	11323.3	23	2.16781e+06
TGME49_235470-t26_1-p1	myosin A	TGME49_235470	93320	31	44.16	1	1287.01					29	2.17623e+06
TGME49_249180-t26_1-p1	bifunctional dihydrofolate reductase-thymidylate synthase	TGME49_249180	68752	17	30.16	2	4783.07	3	10919	3	19690.2			16	2.03871e+06			2	5152.98
TGME49_290660-t26_1-p1	RNA recognition motif-containing protein	TGME49_290660	48395	6	15.25											6	1.82349e+06
TGME49_251690-t26_1-p1	seryl-tRNA synthetase, cytoplasmic, putative	TGME49_251690	54117	14	30.5											14	1.74913e+06
TGME49_229420-t26_1-p1	cytochrome c, putative	TGME49_229420	18101	3	7.36															3	1.72515e+06
TGME49_273490-t26_1-p1	glutamine synthetase, type I, putative	TGME49_273490	65147	17	29.88											17	1.62556e+06
TGME49_293180-t26_1-p1	NADP-specific glutamate dehydrogenase	TGME49_293180	63799	18	29.41			1	1778.73	3	22521.1	2	16273.4			16	1.55245e+06
TGME49_231850-t26_1-p1	serine-threonine phosophatase 2C (PP2C)	TGME49_231850	36791	21	44.11													20	1536590
TGME49_261580-t26_1-p1	histone H2AX	TGME49_261580	14510	3	19.26															3	1.50762e+06
TGME49_251870-t26_1-p1	histone H2Bb	TGME49_251870	12575	6	59.13															6	1.40702e+06
TGME49_265450-t26_1-p1	hexokinase	TGME49_265450	51498	13	33.33									1	2409.26	12	1392830
TGME49_286750-t26_1-p1	MA3 domain-containing protein	TGME49_286750	58969	18	34.76					1	5494.38					18	1.35465e+06
TGME49_230410-t26_1-p1	peroxiredoxin PRX3	TGME49_230410	30534	6	21.2															6	1.33125e+06
TGME49_216670-t26_1-p1	FUSE-binding protein 2 / KH-type splicing regulatory protein	TGME49_216670	100094	22	29.86			1	2605.17	2	12599.7	19	1274072			2	8194.99
TGME49_273090-t26_1-p1	cell division protein CDC48CY	TGME49_273090	89397	19	29.35							19	1.2645e+06
TGME49_317720-t26_1-p1	eukaryotic translation initiation factor 3 subunit 7, putative	TGME49_317720	68767	13	24.63									13	1.22955e+06
TGME49_278830-t26_1-p1	glucose-6-phosphate 1-dehydrogenase	TGME49_278830	98280	20	28.7	1	2091.9	2	2309.8	1	4356.3	20	1.21913e+06
TGME49_205510-t26_1-p1	nucleolar protein 5, putative	TGME49_205510	54349	15	35.51											15	1223689
TGME49_308090-t26_1-p1	rhoptry protein ROP5	TGME49_308090	61102	9	19.85											9	1.22231e+06
TGME49_222220-t26_1-p1	alveolin domain containing intermediate filament IMC7	TGME49_222220	46812	9	26.81											9	1.21991e+06
TGME49_226970-t26_1-p1	ribosomal protein RPS11	TGME49_226970	18677	5	31.06															5	1.20362e+06
TGME49_307850-t26_1-p1	6-phosphogluconate dehydrogenase	TGME49_307850	54701	11	18.81											11	1.15941e+06
TGME49_227620-t26_1-p1	dense granule protein GRA2	TGME49_227620	19804	7	33.51			1	31383.9			1	63575.1					1	8037.16	6	1.04183e+06
TGME49_251500-t26_1-p1	eukaryotic initiation factor-3, subunit 3, putative	TGME49_251500	65714	14	24.33											13	1.11613e+06
TGME49_312630-t26_1-p1	anonymous antigen-1, putative	TGME49_312630	286218	73	28.27	72	1.1135e+06
TGME49_289300-t26_1-p1	methionyl-tRNA synthetase	TGME49_289300	106101	21	23.16	2	5390.89	1	7817.34	3	19308.2	21	1.0795e+06
TGME49_294200-t26_1-p1	glucose-6-phosphate 1-dehydrogenase	TGME49_294200	62736	20	41.61											19	1.10231e+06
TGME49_267080-t26_1-p1	26S protease regulatory subunit 4, putative	TGME49_267080	49121	14	33.79											14	1.09969e+06
TGME49_215980-t26_1-p1	hypothetical protein	TGME49_215980	24466	9	24.29															8	1.09856e+06
TGME49_221620-t26_1-p1	beta-tubulin, putative	TGME49_221620	50037	27	49											9	1.08715e+06
TGME49_204050-t26_1-p1	subtilisin SUB1	TGME49_204050	81777	12	19.05									11	1074517
TGME49_201780-t26_1-p1	microneme protein MIC2	TGME49_201780	82634	10	11.18							7	515579	9	553514
TGME49_262670-t26_1-p1	ribosomal protein RPL18A	TGME49_262670	21330	7	31.15															7	1.06496e+06
TGME49_295350-t26_1-p1	nucleoside diphosphate kinase, putative	TGME49_295350	17639	4	18.71															4	1.06429e+06
TGME49_203050-t26_1-p1	AP2 domain transcription factor AP2VIIa-6	TGME49_203050	257421	1	0.29															1	1.05507e+06
TGME49_319920-t26_1-p1	2-oxo acid dehydrogenases acyltransferase (catalytic domain) domain-containing protein	TGME49_319920	70290	10	15.25											10	1.03155e+06
TGME49_270380-t26_1-p1	ribosomal protein RPS13	TGME49_270380	17176	6	25.83															6	1.02885e+06
TGME49_264610-t26_1-p1	RNA recognition motif-containing protein	TGME49_264610	44974	9	20.93											8	999515	2	22983.2
TGME49_271810-t26_1-p1	lanp, putative	TGME49_271810	31931	11	34.28													11	1.0183e+06
TGME49_300260-t26_1-p1	threonyl-tRNA synthetase family protein	TGME49_300260	95898	22	29.74	1	694.911					20	1.01219e+06
TGME49_201700-t26_1-p1	WD domain, G-beta repeat-containing protein	TGME49_201700	67437	7	14.37									6	1.00721e+06
TGME49_225080-t26_1-p1	ribosomal protein RPS18	TGME49_225080	17723	4	21.79															4	968560
TGME49_306960-t26_1-p1	phenylalanine--tRNA ligase, beta subunit protein	TGME49_306960	74585	13	25.33									11	955085
TGME49_301440-t26_1-p1	calcium-dependent protein kinase CDPK1	TGME49_301440	65421	7	10.82											7	951481
TGME49_236540-t26_1-p1	RNA recognition motif-containing protein	TGME49_236540	53439	10	20.27											10	950420
TGME49_309730-t26_1-p1	thioredoxin reductase	TGME49_309730	70781	11	21.15							1	13462.5	1	6827.16	11	924428
TGME49_222840-t26_1-p1	Ser/Thr phosphatase family protein	TGME49_222840	48158	11	25.64													10	934531
TGME49_223140-t26_1-p1	tRNA binding domain-containing protein	TGME49_223140	50986	12	27.75											12	924543
TGME49_321620-t26_1-p1	dynamin-related protein DRPB	TGME49_321620	95931	28	33.02							23	859937	4	37821.1
TGME49_280600-t26_1-p1	histidyl-tRNA synthetase (HisRS), putative	TGME49_280600	134876	31	25.72	1	1194.07	2	5912.8	29	872313
TGME49_213870-t26_1-p1	UBA/TS-N domain-containing protein	TGME49_213870	117178	21	27.92					21	878094
TGME49_277000-t26_1-p1	transport protein Sec24, putative	TGME49_277000	108035	9	10.5							9	866802
TGME49_226250-t26_1-p1	DEAD (Asp-Glu-Ala-Asp) box polypeptide DDX3X	TGME49_226250	78593	21	29.56	3	10521.8	3	30716.1	5	67528.2	3	45335	19	625088	6	81637.2
TGME49_219310-t26_1-p1	DnaK family protein	TGME49_219310	90143	15	22.74							14	859043
TGME49_231640-t26_1-p1	alveolin domain containing intermediate filament IMC1	TGME49_231640	69596	9	21.35					1	8655.25	1	6487.87	9	828260
TGME49_219540-t26_1-p1	cytosolic tRNA-Ala synthetase	TGME49_219540	139516	29	28.44	1	2071.04	1	3823.5	11	71001.8	26	755934
TGME49_249390-t26_1-p1	glutamate/leucine/phenylalanine/valine dehydrogenase family protein	TGME49_249390	135701	33	34.58	1	2564.26	1	2597.56	32	747897	6	78123.5
TGME49_216000-t26_1-p1	alveolin domain containing intermediate filament IMC3	TGME49_216000	58000	7	14.13					1	7492.25	1	7177.43	6	816135
TGME49_280380-t26_1-p1	poly(ADP-ribose) glycohydrolase	TGME49_280380	61837	12	24.59											12	824488
TGME49_291890-t26_1-p1	microneme protein MIC1	TGME49_291890	48629	7	16.01											6	813502
TGME49_242330-t26_1-p1	ribosomal protein RPS5	TGME49_242330	21613	6	22.4															6	805102
TGME49_284560-t26_1-p1	ribosomal protein RPL9	TGME49_284560	21424	1	6.32															1	800566
TGME49_291960-t26_1-p1	rhoptry kinase family protein ROP40 (incomplete catalytic triad)	TGME49_291960	57948	6	13.52											6	795238
TGME49_263700-t26_1-p1	ribosomal protein RPS14	TGME49_263700	16302	6	44.87															4	793771
TGME49_288860-t26_1-p1	RuvB family 2 protein	TGME49_288860	55446	16	35.83											15	786403
TGME49_294620-t26_1-p1	eukaryotic initiation factor-3, subunit 8, putative	TGME49_294620	109193	19	19.16	3	12439.2	1	6487.59	3	36423	18	713218
TGME49_299210-t26_1-p1	CTP synthase	TGME49_299210	70998	22	37.73									20	764563
TGME49_318310-t26_1-p1	transketolase	TGME49_318310	76907	15	26.18									15	760381
TGME49_248810-t26_1-p1	nuclear factor NF7	TGME49_248810	54283	10	19.72											9	759433
TGME49_233140-t26_1-p1	deoxyuridine 5'-triphosphate nucleotidohydrolase, putative	TGME49_233140	18162	4	24.12															4	753881
TGME49_243730-t26_1-p1	rhoptry protein ROP9	TGME49_243730	37668	8	22.1													8	750055
TGME49_219800-t26_1-p1	vacuolar ATP synthase subunit b, putative	TGME49_219800	56614	13	35.05											13	740641
TGME49_311090-t26_1-p1	ubiquitin carboxyl-terminal hydrolase	TGME49_311090	67167	11	21.75									11	733439					1	2195.34
TGME49_201680-t26_1-p1	eukaryotic initiation factor-3 subunit 10, putative	TGME49_201680	119127	29	29.33			2	15977.5	27	643511	6	74849.9
TGME49_263040-t26_1-p1	ribosomal protein RPS16	TGME49_263040	24055	6	18.96															5	733509
TGME49_236040-t26_1-p1	fructose-1,6-bisphosphate aldolase	TGME49_236040	46960	17	32.79													16	718808
TGME49_292080-t26_1-p1	leucyl-tRNA synthetase	TGME49_292080	141139	30	25.18	4	10167.2	1	1495.82	26	681708	1	7997.5
TGME49_216650-t26_1-p1	S15 sporozoite-expressed protein	TGME49_216650	48988	12	26.61							1	8757.85	1	4772.67			12	682388
TGME49_239260-t26_1-p1	histone H4	TGME49_239260	11439	7	46.6															4	677295
TGME49_234505-t26_1-p1	phenylalanyl-tRNA synthetase alpha chain A, putative	TGME49_234505	59323	15	37.52											15	650537
TGME49_263870-t26_1-p1	glutamate-tRNA ligase	TGME49_263870	95128	12	14.61							12	647976
TGME49_254570-t26_1-p1	hypothetical protein	TGME49_254570	221185	57	33.01	56	604037	9	19048.1	5	12646.3	1	987.064
TGME49_214490-t26_1-p1	peptidase M16 inactive domain-containing protein	TGME49_214490	148868	19	18.63	3	8193.18	4	18459.6	19	609413
TGME49_288500-t26_1-p1	FAD Malate-dehydrogenase (MDH-FAD)	TGME49_288500	60381	10	16.91											10	623847
TGME49_207640-t26_1-p1	isoleucyl-tRNA synthetase family protein	TGME49_207640	141532	16	15.3	2	11268.7	1	4404.93	15	584759	1	12498
TGME49_225050-t26_1-p1	adenosylhomocysteinase, putative	TGME49_225050	64106	11	19.9											10	610915
TGME49_244200-t26_1-p1	2-oxoglutarate dehydrogenase e1 component, mitochondrial precursor, putative	TGME49_244200	124265	22	30.56					3	17056.9	19	593165
TGME49_226730-t26_1-p1	aconitate hydratase ACN/IRP	TGME49_226730	114885	16	19.24							15	605201
TGME49_262690-t26_1-p1	ribosomal protein RPL27	TGME49_262690	16802	7	36.99															6	601300
TGME49_227948-t26_1-p1	peptidase M16 inactive domain-containing protein	TGME49_227948	142764	29	28.48					28	564885
TGME49_254440-t26_1-p1	ribosomal protein RPL12	TGME49_254440	17821	2	15.76															2	563202
TGME49_277760-t26_1-p1	adenylosuccinate lyase, putative	TGME49_277760	74234	16	26.63									15	553519	2	6301.86
TGME49_310030-t26_1-p1	cyclase-associated protein, putative	TGME49_310030	22484	6	33															6	552699
TGME49_261950-t26_1-p1	ATP synthase beta subunit ATP-B	TGME49_261950	59917	14	32.86											11	551338
TGME49_206610-t26_1-p1	pyruvate dehydrogenase complex subunit PDH-E2	TGME49_206610	96880	10	17.76			1	1283.26	1	2259.9	10	543551			1	2481.81
TGME49_244110-t26_1-p1	nucleosome assembly protein (nap) protein	TGME49_244110	48587	6	19.86											6	539587
TGME49_295110-t26_1-p1	rhoptry protein ROP7	TGME49_295110	63395	8	16.17											8	538926
TGME49_254900-t26_1-p1	proteasome subunit beta type 2, putative	TGME49_254900	22001	3	8.9															3	530849
TGME49_248480-t26_1-p1	ribosomal protein RPS9	TGME49_248480	21684	4	28.19															4	523186
TGME49_231140-t26_1-p1	ribosomal protein RPS25	TGME49_231140	18682	4	15.53															4	523145
TGME49_285980-t26_1-p1	glucosephosphate-mutase GPM1	TGME49_285980	70587	13	27.63									13	507493
TGME49_272290-t26_1-p1	pyruvate dehydrogenase complex subunit PD-HE1Beta	TGME49_272290	50016	7	14.26													7	495899
TGME49_288380-t26_1-p1	heat shock protein HSP90	TGME49_288380	81933	11	18.5	3	12590.7	5	33002.5	3	44026.9	8	394812	1	11269.2
TGME49_305340-t26_1-p1	corepressor complex CRC230	TGME49_305340	207303	48	29.33	32	218441	30	259026	3	16507.2
TGME49_215260-t26_1-p1	carbamoylphosphate synthetase	TGME49_215260	187038	48	35.31	5	11909.1	46	472983	1	805.977
TGME49_314100-t26_1-p1	tetratricopeptide repeat-containing protein	TGME49_314100	64293	12	27.24									12	466276	2	18664
TGME49_218780-t26_1-p1	phosphoserine aminotransferase, putative	TGME49_218780	52755	11	27.23											10	483841
TGME49_248700-t26_1-p1	alveolin domain containing intermediate filament IMC12	TGME49_248700	29762	5	21.66													5	482820
TGME49_228190-t26_1-p1	eukaryotic initiation factor-3, subunit 5, putative	TGME49_228190	38070	6	21.68													6	478946
TGME49_227030-t26_1-p1	hypothetical protein	TGME49_227030	18688	4	21.18															4	476830
TGME49_236950-t26_1-p1	hypothetical protein	TGME49_236950	12489	2	10.71															2	476267
TGME49_263530-t26_1-p1	chaperonin, putative	TGME49_263530	13862	4	27.56															4	475910
TGME49_258940-t26_1-p1	acylphosphatase family protein	TGME49_258940	12504	5	35.4															5	475160
TGME49_232130-t26_1-p1	hypothetical protein	TGME49_232130	47866	7	23.09											6	465691
TGME49_235970-t26_1-p1	eukaryotic initiation factor-2 gamma, putative	TGME49_235970	50509	10	30.54											9	451128
TGME49_269190-t26_1-p1	glyceraldehyde-3-phosphate dehydrogenase GAPDH2	TGME49_269190	105120	10	13.47	1	639.557	1	760.973	1	4044.47	9	443895					1	1168
TGME49_213520-t26_1-p1	peptidase M20D, amidohydrolase	TGME49_213520	55117	9	22.96											9	449613
TGME49_254720-t26_1-p1	dense granule protein GRA8	TGME49_254720	28628	4	12.27													4	447974
TGME49_245680-t26_1-p1	ribosomal protein RPL21	TGME49_245680	17894	4	33.12															4	446096
TGME49_209420-t26_1-p1	hypothetical protein	TGME49_209420	26853	4	16.4													4	439974
TGME49_234190-t26_1-p1	serine hydroxymethyltransferase 2, putative	TGME49_234190	65114	7	12.44											6	438052
TGME49_229670-t26_1-p1	ribosomal protein RPS23	TGME49_229670	15802	4	29.37															4	435586
TGME49_286580-t26_1-p1	hypothetical protein	TGME49_286580	107245	22	29.53					2	10456.9	19	422012	1	853.935
TGME49_273370-t26_1-p1	coatomer gamma 2-subunit protein, putative	TGME49_273370	112294	17	20.88	1	975.016	1	859.759	1	5471.94	16	412782	2	7606.86
TGME49_313640-t26_1-p1	hypothetical protein	TGME49_313640	22302	2	13.93															2	425219
TGME49_275650-t26_1-p1	hypothetical protein	TGME49_275650	101159	18	31.13			1	842.685	1	956.687	17	422513
TGME49_262050-t26_1-p1	rhoptry kinase family protein ROP39	TGME49_262050	65132	4	7.65											4	420376
TGME49_230160-t26_1-p1	hypothetical protein	TGME49_230160	15944	4	35.21															4	419962
TGME49_215220-t26_1-p1	hypothetical protein	TGME49_215220	68630	10	28.93									9	346095	2	60252.2
TGME49_205700-t26_1-p1	cyclophilin precursor	TGME49_205700	38197	3	9.77															3	402997
TGME49_311310-t26_1-p1	protein phosphatase 2B catalytic subunit, calcineurin family phosphatse superfamily protein	TGME49_311310	56446	8	20.56											8	402912
TGME49_274190-t26_1-p1	eukaryotic initiation factor 2B epsilon subunit, putative	TGME49_274190	88812	10	14.71							10	400753
TGME49_318440-t26_1-p1	helicase associated domain (ha2) protein	TGME49_318440	236962	46	23.28	42	333412	16	55110	3	6815.28
TGME49_310670-t26_1-p1	glycogen phosphorylase 1, putative	TGME49_310670	105537	14	13.91	1	417.912	1	327.188			13	394190
TGME49_289310-t26_1-p1	cullin family protein	TGME49_289310	103665	5	7.42							5	386365
TGME49_235930-t26_1-p1	domain K- type RNA binding proteins family protein	TGME49_235930	64265	8	15.44									8	383256
TGME49_251810-t26_1-p1	translation initiation factor eIF-5A, putative	TGME49_251810	17468	6	40.99															6	382577
TGME49_290290-t26_1-p1	ubiquitin-activating enzyme E1 family protein	TGME49_290290	119811	16	19.23			1	681.783	14	355042	4	24342.2
TGME49_309820-t26_1-p1	ribosomal protein RPL11	TGME49_309820	20199	2	12.57															2	373329
TGME49_316900-t26_1-p1	Sas10 C-terminal domain-containing protein	TGME49_316900	90550	9	14.75							8	355538	1	16969.1
TGME49_203370-t26_1-p1	hypothetical protein	TGME49_203370	81062	11	16.8							8	372286
TGME49_212300-t26_1-p1	hypothetical protein	TGME49_212300	75643	16	30.89									15	372229
TGME49_290040-t26_1-p1	macrophage migration inhibitory factor, putative	TGME49_290040	12254	5	40.52															5	371766
TGME49_230960-t26_1-p1	splicing factor 3b, subunit 3, putative	TGME49_230960	135744	18	18.73	1	590.313	1	972.423	18	369672
TGME49_223390-t26_1-p1	activating signal cointegrator 1 complex subunit 3 family 1 ASCC3L1, putative	TGME49_223390	248403	45	24.06	42	370480
TGME49_232350-t26_1-p1	lactate dehydrogenase LDH1	TGME49_232350	35548	10	31.91							2	20556.1					9	348984
TGME49_311430-t26_1-p1	fibrillarin	TGME49_311430	31989	7	31.91													6	362212
TGME49_229180-t26_1-p1	HEAT repeat-containing protein	TGME49_229180	136164	21	21.81			1	621.26	21	361070
TGME49_227960-t26_1-p1	PCI domain-containing protein	TGME49_227960	55708	10	17.39											10	361155
TGME49_312530-t26_1-p1	splicing factor, CC1 family protein	TGME49_312530	69366	7	12.95									7	358277
TGME49_294350-t26_1-p1	DEAD/DEAH box helicase domain-containing protein	TGME49_294350	273734	52	24.08	49	357494	1	695.217
TGME49_238010-t26_1-p1	ribosomal protein RPL23A	TGME49_238010	18562	5	29.34															5	356773
TGME49_215060-t26_1-p1	small GTP-binding protein sar1, putative	TGME49_215060	22139	4	22.4															4	355626
TGME49_320050-t26_1-p1	ribosomal protein RPL5	TGME49_320050	35342	8	26.13													7	350500
TGME49_313410-t26_1-p1	proteasome 26S regulatory subunit	TGME49_313410	117709	21	26.67					21	350039
TGME49_307810-t26_1-p1	hypothetical protein	TGME49_307810	44172	2	6.15											2	346922
TGME49_231080-t26_1-p1	ribosomal protein RPL38	TGME49_231080	9583	3	28.57															3	343227
TGME49_221210-t26_1-p1	cyclophilin	TGME49_221210	19604	4	21.79															4	335778
TGME49_207770-t26_1-p1	PCI domain-containing protein	TGME49_207770	55463	9	24.85											8	333887
TGME49_232660-t26_1-p1	Hsp70 interacting protein HIP	TGME49_232660	45143	8	13.41											7	333353
TGME49_268850-t26_1-p1	enolase 2	TGME49_268850	52114	6	19.79			1	1830.08							4	331122
TGME49_279100-t26_1-p1	hypothetical protein	TGME49_279100	47694	3	6.9											3	331958
TGME49_249530-t26_1-p1	exportin 1, putative	TGME49_249530	129092	20	21.07	4	9980.51	1	1345.82	9	50532	16	263069	1	5062.43
TGME49_245470-t26_1-p1	mitotic checkpoint protein, BUB3 family protein	TGME49_245470	36575	11	31.63													10	329473
TGME49_257490-t26_1-p1	prefoldin subunit superfamily protein	TGME49_257490	33032	1	2.34			1	39178.6	1	289771
TGME49_289830-t26_1-p1	eukaryotic initiation factor-3, delta subunit, putative	TGME49_289830	37767	7	23.88													7	328293
TGME49_256760-t26_1-p1	pyruvate kinase PyK1	TGME49_256760	57530	10	21.09			1	7959.46							9	315123
TGME49_229000-t26_1-p1	kelch repeat-containing protein	TGME49_229000	68113	5	10.97									5	321029
TGME49_223920-t26_1-p1	rhoptry neck protein RON3	TGME49_223920	222883	36	19.66	13	41953.2	33	278031
TGME49_300280-t26_1-p1	LSM domain-containing protein	TGME49_300280	17883	5	34.91															5	317456
TGME49_215775-t26_1-p1	rhoptry protein ROP8	TGME49_215775	65913	4	7.48											4	315002
TGME49_229930-t26_1-p1	p25-alpha family protein	TGME49_229930	17340	5	36.81	1	3952			1	11868.8	1	23685.5			1	6639.32			5	264870
TGME49_231600-t26_1-p1	HEAT repeat-containing protein	TGME49_231600	128091	19	25.75					19	306794
TGME49_263060-t26_1-p1	Proteasome/cyclosome repeat-containing protein	TGME49_263060	125593	17	20.16	1	1870.96			17	300740	1	3738.89
TGME49_320570-t26_1-p1	elongation factor Tu, putative	TGME49_320570	63550	10	28.5									9	301093
TGME49_278870-t26_1-p1	myosin F	TGME49_278870	216398	32	22.02	12	60418.5	25	186617	7	50494.1			2	2010.79
TGME49_305980-t26_1-p1	pyruvate dehydrogenase complex subunit PDH-E3I	TGME49_305980	66839	6	13.95											5	299137
TGME49_267400-t26_1-p1	ribosomal protein RPL32	TGME49_267400	15617	4	28.36															4	297922
TGME49_283540-t26_1-p1	hypothetical protein	TGME49_283540	41946	2	4.79													2	297861
TGME49_268200-t26_1-p1	RNA recognition motif-containing protein	TGME49_268200	66430	6	11.11									1	3724.07	3	65140.3	5	227141
TGME49_261210-t26_1-p1	26s proteasome subunit p55, putative	TGME49_261210	55050	10	23.09											9	294265
TGME49_294898-t26_1-p1	tetratricopeptide repeat-containing protein	TGME49_294898	88633	13	19.47							11	293962
TGME49_291930-t26_1-p1	RNA recognition motif-containing protein	TGME49_291930	73118	6	10.5							6	289486
TGME49_286080-t26_1-p1	elongation factor 2 family protein	TGME49_286080	113342	9	11.61					1	4660.73	9	282664
TGME49_295320-t26_1-p1	embryo sac development arrest EDA7, putative	TGME49_295320	69302	7	9.73									7	280810	1	3365.94
TGME49_307570-t26_1-p1	glycerol-3-phosphate dehydrogenase (gpdh), putative	TGME49_307570	98815	14	16.96											13	284158
TGME49_240650-t26_1-p1	coatomer protein complex, subunit alpha, putative	TGME49_240650	142954	20	18.69					19	283605
TGME49_230210-t26_1-p1	alveolin domain containing intermediate filament IMC10	TGME49_230210	61188	5	14.11									5	167378			3	109001
TGME49_258870-t26_1-p1	hypothetical protein	TGME49_258870	101597	13	18.67							8	181933	5	40546.7	5	52948.7
TGME49_232940-t26_1-p1	heat shock protein HSP20	TGME49_232940	20266	4	25.95															3	274138
TGME49_219590-t26_1-p1	RuvB family 1 protein	TGME49_219590	52950	7	19.11											7	273160
TGME49_300100-t26_1-p1	rhoptry neck protein RON2	TGME49_300100	166464	15	9.47					15	272957
TGME49_233480-t26_1-p1	SAG-related sequence SRS29C	TGME49_233480	39119	4	11.83													4	271759
TGME49_216590-t26_1-p1	HEAT repeat-containing protein	TGME49_216590	111196	9	10.4							9	268521
TGME49_205380-t26_1-p1	fructose-bisphospatase I	TGME49_205380	42246	7	19.85													7	267600
TGME49_209160-t26_1-p1	myristoyl CoA:protein N-myristoyltransferase	TGME49_209160	52377	5	10.15											5	264624
TGME49_254770-t26_1-p1	Ser/Thr phosphatase family protein	TGME49_254770	46467	4	14.29													4	263945
TGME49_261250-t26_1-p1	histone H2A1	TGME49_261250	19546	3	14.44															1	263655
TGME49_253290-t26_1-p1	valyl-tRNA synthetase	TGME49_253290	125050	18	21.61	1	2462.47	1	1726.11	4	58270.3	14	197304
TGME49_269840-t26_1-p1	proteasome regulatory subunit	TGME49_269840	35262	6	16.88													5	256769
TGME49_231970-t26_1-p1	pre-mRNA processing splicing factor PRP8	TGME49_231970	291848	46	19.42	44	256082
TGME49_310040-t26_1-p1	ubiquitin conjugating enzyme E2, putative	TGME49_310040	22630	2	9.05															2	252693
TGME49_248390-t26_1-p1	ribosomal protein RPL26	TGME49_248390	16309	6	35.46															5	246752
TGME49_308860-t26_1-p1	hypothetical protein	TGME49_308860	69757	6	10.24									5	246214
TGME49_309740-t26_1-p1	LSM domain-containing protein	TGME49_309740	14411	2	13.74															2	244650
TGME49_226830-t26_1-p1	DnaK family protein	TGME49_226830	103193	10	12.79					7	95302	5	143542
TGME49_222380-t26_1-p1	importin-beta N-terminal domain-containing protein	TGME49_222380	129488	14	15.34					3	20688.2	12	217300
TGME49_313010-t26_1-p1	DEAD (Asp-Glu-Ala-Asp) box polypeptide DDX6	TGME49_313010	53434	8	17.26											8	235947
TGME49_253730-t26_1-p1	importin-beta N-terminal domain-containing protein	TGME49_253730	115146	7	7.15							7	235516
TGME49_266060-t26_1-p1	ribosomal protein RPSA	TGME49_266060	31512	4	19.86													4	224955
TGME49_264830-t26_1-p1	hypothetical protein	TGME49_264830	136604	22	23.56	2	2148.3			21	222274
TGME49_315490-t26_1-p1	rhoptry protein ROP10	TGME49_315490	60912	6	14.85									5	211226	1	5821.16	1	2060.64
TGME49_258410-t26_1-p1	photosensitized INA-labeled protein PHIL1	TGME49_258410	18844	5	33.33															4	218385
TGME49_266990-t26_1-p1	beta-COP	TGME49_266990	121954	11	10.79					1	10267.3	10	208109
TGME49_207840-t26_1-p1	ribosomal protein RPS17	TGME49_207840	15229	3	18.18															3	217369
TGME49_206470-t26_1-p1	pyruvate dehydrogenase complex subunit PDH-E3II	TGME49_206470	55121	7	18.5											6	214315
TGME49_222160-t26_1-p1	aldehyde dehydrogenase	TGME49_222160	53702	9	23.14											7	210048
TGME49_209440-t26_1-p1	hypothetical protein	TGME49_209440	383535	22	7.65	7	13104	10	20951.9	15	128021	5	28612.9	6	18305.1			2	902.599
TGME49_289330-t26_1-p1	ubiquitin carboxyl-terminal hydrolase family 2 protein	TGME49_289330	248338	26	15.41	25	182172	7	17127.8	5	8596.59
TGME49_215460-t26_1-p1	ribosomal protein RPS24	TGME49_215460	30375	5	18.35															4	207525
TGME49_284190-t26_1-p1	pyruvate carboxylase	TGME49_284190	152146	16	14.59					16	207168
TGME49_264000-t26_1-p1	aldehyde dehydrogenase	TGME49_264000	68990	8	14.9									8	206579
TGME49_321680-t26_1-p1	hypothetical protein	TGME49_321680	40661	4	13.17											4	204187
TGME49_309140-t26_1-p1	transducin beta-like protein TBL1	TGME49_309140	84699	11	20.53							11	203069
TGME49_294930-t26_1-p1	leucine rich repeat-containing protein	TGME49_294930	83267	2	2.71							1	202923
TGME49_224850-t26_1-p1	polyadenylate binding protein, putative	TGME49_224850	82573	5	7.68							4	192526	1	10391.5
TGME49_202680-t26_1-p1	peptidase M16, alpha subunit, putative	TGME49_202680	62204	7	17.94											7	202805
TGME49_269885-t26_1-p1	rhoptry metalloprotease toxolysin TLN1	TGME49_269885	182009	19	14.22			3	8011.14	13	172929							3	17685.8
TGME49_258070-t26_1-p1	hypothetical protein	TGME49_258070	75742	12	21.98									9	195342
TGME49_280700-t26_1-p1	arginine decarboxylase	TGME49_280700	135672	20	19.18					18	194253
TGME49_270550-t26_1-p1	gamma-glutamyl phosphate reductase, putative	TGME49_270550	54410	4	9.36											4	193466
TGME49_251540-t26_1-p1	dense granule protein GRA9	TGME49_251540	35338	2	9.75													2	192452
TGME49_311400-t26_1-p1	WD domain, G-beta repeat-containing protein	TGME49_311400	165572	13	9.72			13	168211	2	22348.7
TGME49_209910-t26_1-p1	histone H2Bv	TGME49_209910	13732	3	28.46															3	189255
TGME49_235020-t26_1-p1	COPI protein, putative	TGME49_235020	137057	14	13.85	1	976.972			11	117227	4	60781.7							1	8299.06
TGME49_243960-t26_1-p1	nuclear transport factor 2 (ntf2) domain-containing protein	TGME49_243960	84196	6	8.28							6	187162
TGME49_280490-t26_1-p1	U-box domain-containing protein	TGME49_280490	121997	12	12.49					11	124104	4	62559.4
TGME49_212310-t26_1-p1	vacuolar ATP synthetase	TGME49_212310	16779	1	11.46															1	184245
TGME49_230850-t26_1-p1	hypothetical protein	TGME49_230850	50618	5	16.39											5	180597
TGME49_232230-t26_1-p1	ribosomal protein RPL30	TGME49_232230	11662	3	38.89															3	179791
TGME49_251620-t26_1-p1	flap structure-specific endonuclease 1, putative	TGME49_251620	60296	6	12.86									6	178334
TGME49_214940-t26_1-p1	MIC2-associated protein M2AP	TGME49_214940	34552	5	16.67													5	176774
TGME49_223590-t26_1-p1	proteasome subunit	TGME49_223590	39397	3	10.03															2	176398
TGME49_297970-t26_1-p1	aspartyl aminopeptidase	TGME49_297970	55897	9	25.2											9	176000
TGME49_286920-t26_1-p1	SWIRM domain-containing protein	TGME49_286920	83974	9	15.38							9	164884	3	10075.4
TGME49_315270-t26_1-p1	hypothetical protein	TGME49_315270	84600	5	9.23							5	163104			1	11145.2
TGME49_305770-t26_1-p1	ABC transporter, ATP-binding domain-containing protein	TGME49_305770	50658	4	8.21											4	170951	1	3171.91
TGME49_229250-t26_1-p1	ribosomal protein RPL28	TGME49_229250	14753	3	31.01															3	171545
TGME49_265310-t26_1-p1	heat shock protein 40, putative	TGME49_265310	37197	8	33.33													8	171300
TGME49_221490-t26_1-p1	cell cycle regulator protein	TGME49_221490	20071	5	30.56															5	171286
TGME49_265530-t26_1-p1	RNA recognition motif-containing protein	TGME49_265530	51488	4	12.6											4	170820
TGME49_224350-t26_1-p1	aminopeptidase N, putative	TGME49_224350	156761	16	12.54							15	169088
TGME49_247300-t26_1-p1	hypothetical protein	TGME49_247300	95512	6	7.75			1	996.596			6	160044	1	8044.03
TGME49_295040-t26_1-p1	HEAT repeat-containing protein	TGME49_295040	104595	11	16.27			1	2353.11			9	163463
TGME49_273870-t26_1-p1	SWI2/SNF2 ISWI-like (AT hook)	TGME49_273870	175264	21	15.49	3	9370.5	19	150958			1	5025.96
TGME49_253900-t26_1-p1	parasite porphobilinogen synthase PBGS	TGME49_253900	71374	9	12.77									1	10296.8	8	154947
TGME49_240500-t26_1-p1	hypothetical protein	TGME49_240500	32036	3	14.33													3	163159
TGME49_219750-t26_1-p1	cytochrome c, putative	TGME49_219750	12453	3	16.52															2	161202
TGME49_257990-t26_1-p1	heat shock protein 101, putative	TGME49_257990	104297	12	17.37							11	160820
TGME49_263070-t26_1-p1	CMGC kinase, CK2 family	TGME49_263070	59824	7	15.96											7	152228	1	4911.47
TGME49_240600-t26_1-p1	chaperonin cpn60, putative	TGME49_240600	72237	10	17.69									8	157115
TGME49_244690-t26_1-p1	hypothetical protein	TGME49_244690	65004	8	18.46									8	155647			1	272.252
TGME49_318710-t26_1-p1	ATP-binding cassette sub-family F member 1	TGME49_318710	89166	5	6.54							4	154550
TGME49_248120-t26_1-p1	hypothetical protein	TGME49_248120	100764	5	5.3	1	4465.92	2	10968.6			5	138223
TGME49_205710-t26_1-p1	lysine-tRNA ligase	TGME49_205710	74395	7	10.49									7	152534
TGME49_214790-t26_1-p1	glycoprotein	TGME49_214790	31444	2	5.3															2	152446
TGME49_236580-t26_1-p1	Prp31-15.5k-U4 Snrna Complex family protein	TGME49_236580	19947	3	11.54															3	151579
TGME49_243570-t26_1-p1	ribosomal protein RPS26	TGME49_243570	12726	1	10.71															1	150938
TGME49_297070-t26_1-p1	hypothetical protein	TGME49_297070	58104	2	4.24											2	150618
TGME49_239620-t26_1-p1	5'-nucleotidase, C-terminal domain-containing protein	TGME49_239620	95852	7	8.71							7	150054
TGME49_202260-t26_1-p1	hypothetical protein	TGME49_202260	30532	1	3.23			1	36655.8							1	112197
TGME49_293870-t26_1-p1	thioredoxin, putative	TGME49_293870	12036	3	33.96															3	148106
TGME49_217600-t26_1-p1	calcium-dependent protein kinase CDPK9	TGME49_217600	75601	11	18.47									9	147795
TGME49_239590-t26_1-p1	WD domain, G-beta repeat-containing protein	TGME49_239590	74725	8	17.57									8	147655
TGME49_275690-t26_1-p1	ClpB, putative	TGME49_275690	114550	11	13.99							10	147031
TGME49_211690-t26_1-p1	AAA family protein	TGME49_211690	167149	17	14.82	1	544.241	1	1687.6	17	143748
TGME49_239820-t26_1-p1	D-3-phosphoglycerate dehydrogenase	TGME49_239820	65194	8	14.74			1	1563.01	1	6387.79			7	137977
TGME49_240890-t26_1-p1	6-phosphofructokinase	TGME49_240890	154691	10	9.01					10	145345
TGME49_297720-t26_1-p1	trehalose-phosphatase	TGME49_297720	136691	10	9					10	145106
TGME49_222860-t26_1-p1	eukaryotic translation initiation factor, putative	TGME49_222860	88392	6	8.07	3	7048			2	8982.33	5	128844
TGME49_249250-t26_1-p1	ribosomal protein RPL35A	TGME49_249250	12847	2	16.96															1	142363
TGME49_209030-t26_1-p1	actin ACT1	TGME49_209030	41908	5	14.63	1	2453.18	2	6930.54	1	13467.1	2	55132.2	1	12538.4	1	9837.44	4	40983.2
TGME49_314400-t26_1-p1	pyruvate dehydrogenase E1 component, beta subunit, putative	TGME49_314400	45599	7	26.95													7	139893
TGME49_233520-t26_1-p1	ATP-dependent RNA helicase	TGME49_233520	88865	5	7.99							5	137774
TGME49_309290-t26_1-p1	hypothetical protein	TGME49_309290	33683	2	8.85													2	136873
TGME49_237000-t26_1-p1	polyphosphoinositide binding protein, putative	TGME49_237000	38000	5	18.51													5	136563
TGME49_253470-t26_1-p1	alveolin domain containing intermediate filament IMC13	TGME49_253470	45789	1	2.01											1	135780
TGME49_321500-t26_1-p1	RNA recognition motif-containing protein	TGME49_321500	50938	5	12.84											4	125193	1	9584.41
TGME49_299780-t26_1-p1	hypothetical protein	TGME49_299780	59371	5	8.44											4	134423
TGME49_220860-t26_1-p1	DEAD/DEAH box helicase	TGME49_220860	65158	6	11.46									6	133891
TGME49_304770-t26_1-p1	ubiquitin-conjugating enzyme subfamily protein	TGME49_304770	17622	1	7.1															1	133550
TGME49_300140-t26_1-p1	elongation factor 1-gamma, putative	TGME49_300140	44040	2	7.87							2	72317.7			1	60784.8
TGME49_238940-t26_1-p1	GDP mannose 4,6-dehydratase, putative	TGME49_238940	41717	6	19.02													5	133006
TGME49_221320-t26_1-p1	acetyl-CoA carboxylase ACC1	TGME49_221320	287682	36	16.12	33	130718			2	1675
TGME49_294790-t26_1-p1	hypothetical protein	TGME49_294790	37700	2	6.27													2	129816
TGME49_269950-t26_1-p1	hypothetical protein	TGME49_269950	104680	7	9							7	128385
TGME49_288460-t26_1-p1	hypothetical protein	TGME49_288460	198470	20	14.98	1	2633.35	19	122774	1	2529.55
TGME49_240870-t26_1-p1	beta adaptin protein, putative	TGME49_240870	101992	5	6.49							5	127575
TGME49_209210-t26_1-p1	hypothetical protein	TGME49_209210	165808	18	14.29			16	107712	3	18820.5
TGME49_223050-t26_1-p1	ribosomal protein RPS20	TGME49_223050	25899	4	21.46															4	125382
TGME49_276930-t26_1-p1	hypothetical protein	TGME49_276930	21468	2	9.18															2	124757
TGME49_288650-t26_1-p1	dense granule protein GRA12	TGME49_288650	47923	5	13.07													4	80332	3	43323
TGME49_202500-t26_1-p1	GAPM1a	TGME49_202500	33535	2	5.25	1	9654.89	1	25237.7	1	21049.9							2	67505.3
TGME49_225790-t26_1-p1	PDI family protein	TGME49_225790	21659	3	15.87															3	120426
TGME49_237110-t26_1-p1	replication factor C subunit 2, putative	TGME49_237110	39797	5	14.29													5	119698
TGME49_261050-t26_1-p1	RNB family domain-containing protein	TGME49_261050	129295	4	4					4	118025
TGME49_240060-t26_1-p1	hypothetical protein	TGME49_240060	88533	2	3.91							2	114129			1	3734.62
TGME49_320600-t26_1-p1	cold-shock DNA-binding domain-containing protein	TGME49_320600	23061	2	14.35															2	117328
TGME49_209100-t26_1-p1	PUB domain-containing protein	TGME49_209100	68150	6	9.03									6	116572
TGME49_211090-t26_1-p1	aminotransferase, class V superfamily protein	TGME49_211090	68283	5	8.7											5	115112
TGME49_267060-t26_1-p1	ribosomal protein RPL14	TGME49_267060	17878	1	5.73															1	115029
TGME49_235490-t26_1-p1	hypothetical protein	TGME49_235490	102119	5	7.26							4	108538	1	4966.91
TGME49_257350-t26_1-p1	eukaryotic translation initiation factor, putative	TGME49_257350	89776	5	8.17							3	105123					3	8212.27
TGME49_262920-t26_1-p1	trypsin domain-containing protein	TGME49_262920	104525	6	7.61											5	113011
TGME49_294010-t26_1-p1	yrdC domain-containing protein	TGME49_294010	86987	6	9.9							5	111999			1	567.203
TGME49_214575-t26_1-p1	hypothetical protein	TGME49_214575	10282	1	13.04															1	110792
TGME49_215040-t26_1-p1	HEAT repeat-containing protein	TGME49_215040	181968	24	19.74			23	109230
TGME49_308020-t26_1-p1	SAG-related sequence SRS57	TGME49_308020	41971	3	7.01													2	106608
TGME49_278490-t26_1-p1	Zn-finger, RING domain containing protein	TGME49_278490	32748	5	18.34													4	105124
TGME49_263190-t26_1-p1	adenylosuccinate lyase, putative	TGME49_263190	55136	4	8.8											4	104725
TGME49_239760-t26_1-p1	ribosomal protein RPL22	TGME49_239760	15074	4	34.59															2	104382
TGME49_319340-t26_1-p1	hypothetical protein	TGME49_319340	52403	4	9.77											4	104259
TGME49_224890-t26_1-p1	hypothetical protein	TGME49_224890	116709	10	11.81					9	103245	1	485.626
TGME49_319658-t26_1-p1	CBF/Mak21 family protein	TGME49_319658	73895	7	12.02									7	103713
TGME49_245620-t26_1-p1	ribosomal-ubiquitin protein RPS27A	TGME49_245620	17321	2	14.94															2	103251
TGME49_274050-t26_1-p1	hypothetical protein	TGME49_274050	34835	4	16.45													3	103083
TGME49_316340-t26_1-p1	hypothetical protein	TGME49_316340	26850	4	27.98													4	101895
TGME49_294670-t26_1-p1	translation initiation factor 3 subunit	TGME49_294670	31813	6	26.35													4	73151.2	2	28721
TGME49_223960-t26_1-p1	ubiquitin interaction motif family protein	TGME49_223960	41377	4	12.63											3	101352
TGME49_314430-t26_1-p1	serine/threonine specific protein phosphatase	TGME49_314430	53794	5	11.06											4	95636.9	1	4484.23
TGME49_305850-t26_1-p1	RNA recognition motif-containing protein	TGME49_305850	39168	4	16.94													3	80377.9	1	19337.3
TGME49_292920-t26_1-p1	heat shock protein 75, putative	TGME49_292920	95159	7	9.87							7	99205.9
TGME49_231350-t26_1-p1	glucosamine-fructose-6-phosphate aminotransferase	TGME49_231350	96713	6	8.35									6	99179.1
TGME49_287180-t26_1-p1	hypothetical protein	TGME49_287180	239165	21	11.94	20	98678.6
TGME49_207450-t26_1-p1	DNA segment, Chr 10, Wayne State University 52, expressed family protein	TGME49_207450	56365	3	6.17											3	98313.4
TGME49_238250-t26_1-p1	ribosomal protein RPL36	TGME49_238250	11408	1	8.91															1	97003
TGME49_237140-t26_1-p1	ethylene inducible protein, putative	TGME49_237140	32704	4	16.29													4	96483
TGME49_236650-t26_1-p1	DEAD (Asp-Glu-Ala-Asp) box polypeptide 17	TGME49_236650	59968	4	8.55											3	95064.8
TGME49_224050-t26_1-p1	AP2 domain transcription factor AP2X-4	TGME49_224050	93810	4	5.36							3	92303.1
TGME49_217540-t26_1-p1	RNA recognition motif-containing protein	TGME49_217540	38104	5	11.4													5	92241.8
TGME49_269800-t26_1-p1	glutamine-dependent NAD(+) synthetase protein, putative	TGME49_269800	94398	2	3.48							2	92143.1
TGME49_278530-t26_1-p1	multiprotein bridging factor type 1 family transcriptional co-activator, putative	TGME49_278530	16077	1	9.03															1	91601.1
TGME49_214260-t26_1-p1	alpha-glucan water dikinase 1, putative	TGME49_214260	191685	16	11.37	1	1718.06	15	89530.4
TGME49_305910-t26_1-p1	hypothetical protein	TGME49_305910	69324	5	8.61									5	90645.9
TGME49_228170-t26_1-p1	inner membrane complex protein IMC2A	TGME49_228170	170816	16	12.47	1	546.691	4	9217	13	80618.6
TGME49_284540-t26_1-p1	ATP synthase F1, delta subunit protein	TGME49_284540	27635	3	11.51															3	89941
TGME49_202950-t26_1-p1	hypothetical protein	TGME49_202950	151800	8	7.71					8	89714.5
TGME49_204400-t26_1-p1	ATPase synthase subunit alpha, putative	TGME49_204400	62146	7	12.13											4	89704.6
TGME49_277500-t26_1-p1	26S proteasome regulatory subunit 7, putative	TGME49_277500	52368	9	22.06											7	88824.9
TGME49_229010-t26_1-p1	rhoptry neck protein RON4	TGME49_229010	107176	5	7.22							4	87949.4
TGME49_311410-t26_1-p1	M phase phosphoprotein MPP10, putative	TGME49_311410	97067	7	11.43					5	69276.3	1	18053.5
TGME49_295730-t26_1-p1	tetratricopeptide repeat-containing protein	TGME49_295730	47415	3	8.29											3	87246
TGME49_272910-t26_1-p1	T-complex protein 1 delta subunit	TGME49_272910	58644	5	10.52											5	86808
TGME49_239752-t26_1-p1	hypothetical protein	TGME49_239752	102143	4	4.75							4	86492.2
TGME49_249990-t26_1-p1	hypothetical protein	TGME49_249990	92586	6	9.9							6	86256.7
TGME49_286210-t26_1-p1	protein phosphatase 4, catalytic subunit	TGME49_286210	38032	5	14.2													5	86081.1
TGME49_247460-t26_1-p1	proliferating cell nuclear antigen PCNA1	TGME49_247460	34552	3	13.88													3	85910.4
TGME49_283850-t26_1-p1	peptidyl-prolyl cis-trans isomerase	TGME49_283850	55589	2	4.57	1	8788.95			2	43976.9			1	32996.6
TGME49_258980-t26_1-p1	hypothetical protein	TGME49_258980	37807	4	12.92													3	85662.4
TGME49_229480-t26_1-p1	calcium binding protein precursor, putative	TGME49_229480	38291	4	7.76													3	84999.7
TGME49_241150-t26_1-p1	hypothetical protein	TGME49_241150	65206	4	6.93									4	84409.6
TGME49_234450-t26_1-p1	ribosomal protein RPS15A	TGME49_234450	26589	3	12.55															3	84036.8
TGME49_229750-t26_1-p1	hypothetical protein	TGME49_229750	146076	15	12.39			14	83380.6	1	465.72
TGME49_268810-t26_1-p1	ck2 beta subunit	TGME49_268810	34143	1	2.54													1	83800.8
TGME49_258210-t26_1-p1	DNA-directed RNA polymerase II RPB2	TGME49_258210	140951	9	8.9	1	374.028			9	82726.6
TGME49_271100-t26_1-p1	NUC153 domain-containing protein	TGME49_271100	111272	2	1.81					2	82320.9
TGME49_223672-t26_1-p1	3'(2'),5'-bisphosphate nucleotidase	TGME49_223672	37937	5	16.86													4	81595.5
TGME49_290850-t26_1-p1	WD-40 repeat protein	TGME49_290850	58309	5	11.32											5	81338.3
TGME49_291680-t26_1-p1	Sec23/Sec24 trunk domain-containing protein	TGME49_291680	87610	4	6.07			1	849.373	1	1985.93	4	77629.7
TGME49_294710-t26_1-p1	RNA recognition motif-containing protein	TGME49_294710	122114	5	7.3					5	80371.6
TGME49_263580-t26_1-p1	bromodomain-containing protein	TGME49_263580	76521	4	7.98							3	67578.5					2	12582.5
TGME49_203980-t26_1-p1	hypothetical protein	TGME49_203980	201280	8	5.16	8	64484.2	1	6352.98			1	9205.08
TGME49_311230-t26_1-p1	hypothetical protein	TGME49_311230	504758	21	6.38	21	73022	4	2612.15	1	1138.01	1	1598.13							1	657.611
TGME49_216860-t26_1-p1	DEAD (Asp-Glu-Ala-Asp) box polypeptide DDX39	TGME49_216860	49114	2	6.68											2	78387.7
TGME49_236210-t26_1-p1	peptidase M16 family potein, putative	TGME49_236210	56916	4	8.84											3	77810
TGME49_285850-t26_1-p1	peptidyl-prolyl cis-trans isomerase, FKBP-type domain-containing protein	TGME49_285850	46099	3	9.35											3	77222.9
TGME49_319850-t26_1-p1	splicing factor U2AF family SnRNP auxilary factor large subunit, RRM domain-containing protein	TGME49_319850	51681	5	14.95											5	76028.7
TGME49_269200-t26_1-p1	crooked neck family 1 protein isoform 2, putative	TGME49_269200	81694	4	6.12									4	75922.7
TGME49_223540-t26_1-p1	importin-beta N-terminal domain-containing protein	TGME49_223540	122221	5	6.21					4	53776	2	21989.4
TGME49_230450-t26_1-p1	bifunctional GMP synthase/glutamine amidotransferase protein	TGME49_230450	62295	3	5.1					2	74498.9			1	950.59
TGME49_206590-t26_1-p1	calcium-dependent protein kinase CDPK2A	TGME49_206590	86378	7	11.83									6	75391.8
TGME49_268950-t26_1-p1	hypothetical protein	TGME49_268950	60197	8	22.1									7	75096.8
TGME49_279380-t26_1-p1	hypothetical protein	TGME49_279380	34769	2	8.12													2	74876.6
TGME49_259880-t26_1-p1	hypothetical protein	TGME49_259880	88025	4	5.54					3	72389.4					1	2447.05
TGME49_305780-t26_1-p1	5'-3' exoribonuclease, putative	TGME49_305780	138629	7	7.26					7	73321.4
TGME49_288630-t26_1-p1	nucleosome assembly protein (NAP), putative	TGME49_288630	32081	2	3.56													2	73294.9
TGME49_260540-t26_1-p1	alveolin domain containing intermediate filament IMC14	TGME49_260540	83304	5	10.64							4	72375.7
TGME49_283510-t26_1-p1	hypothetical protein	TGME49_283510	34857	4	14.92													4	71926.3
TGME49_205220-t26_1-p1	U5 snRNP-associated subunit, putative	TGME49_205220	122775	8	7.64					7	71509.9
TGME49_277720-t26_1-p1	GDA1/CD39 (nucleoside phosphatase) family protein	TGME49_277720	92539	6	9.8									6	71366.4
TGME49_248890-t26_1-p1	actin-like protein ALP3b	TGME49_248890	60828	3	6.17									3	70659.8
TGME49_313140-t26_1-p1	isocitrate dehydrogenase	TGME49_313140	68296	5	9.82											5	70641.6
TGME49_311470-t26_1-p1	rhoptry neck protein RON5	TGME49_311470	187410	7	3.94							5	70415.1
TGME49_269980-t26_1-p1	preprotein translocase Sec61, putative	TGME49_269980	52165	5	11.63													5	70392.7
TGME49_203990-t26_1-p1	rhoptry protein ROP12	TGME49_203990	25483	1	10.59													1	69515.4
TGME49_311870-t26_1-p1	WD domain, G-beta repeat-containing protein	TGME49_311870	59644	5	13.83									4	69041.5
TGME49_205250-t26_1-p1	rhoptry protein ROP18	TGME49_205250	62666	2	3.79											2	68881.8
TGME49_250060-t26_1-p1	DNA-directed RNA polymerase I RPA12	TGME49_250060	37762	4	15.52													4	67572
TGME49_228100-t26_1-p1	hypothetical protein	TGME49_228100	139352	10	10.73					8	67371.1
TGME49_298020-t26_1-p1	DEAD-family helicase	TGME49_298020	130967	7	7.08					6	65810.4	1	1423.38
TGME49_213280-t26_1-p1	SAG-related sequence SRS25	TGME49_213280	20791	1	7.85															1	67013.8
TGME49_308040-t26_1-p1	ZPR1 zinc finger domain-containing protein	TGME49_308040	62986	5	15.32									5	66504.3
TGME49_250820-t26_1-p1	hypothetical protein	TGME49_250820	120889	4	5.1					4	66434
TGME49_290670-t26_1-p1	leucyl aminopeptidase LAP	TGME49_290670	83237	5	6.02			2	6069.48	3	24768.9	1	10476.7	3	17044.4	1	3575.95	2	4374
TGME49_308920-t26_1-p1	splicing factor U2AF protein	TGME49_308920	83179	3	6.49							3	65322.6
TGME49_219820-t26_1-p1	polyubiquitin UbC, putative	TGME49_219820	68581	2	37.97	1	14785.6	1	8422.9	2	27593.9	1	1880.78	1	11581.4					1	834.165
TGME49_247760-t26_1-p1	AMP-binding enzyme domain-containing protein	TGME49_247760	86987	3	5.3							3	65064.8
TGME49_205010-t26_1-p1	U2 small nuclear ribonucleoprotein family protein, putative	TGME49_205010	150782	4	2.67					4	65027.3
TGME49_309600-t26_1-p1	hypothetical protein	TGME49_309600	106522	6	8.33							4	43804.7	4	21021.4
TGME49_214200-t26_1-p1	WD domain, G-beta repeat-containing protein	TGME49_214200	150519	11	9.53					11	64736.3
TGME49_286450-t26_1-p1	dense granule protein GRA5	TGME49_286450	12838	2	17.5															1	64734.6
TGME49_214220-t26_1-p1	hypothetical protein	TGME49_214220	23370	2	8.02															2	64266.8
TGME49_218920-t26_1-p1	proteasome subunit beta type, putative	TGME49_218920	33758	3	7.77															3	64054.1
TGME49_249610-t26_1-p1	hypothetical protein	TGME49_249610	135999	8	10.16					8	63956.5
TGME49_263180-t26_1-p1	myosin D	TGME49_263180	91052	6	8.64							6	63858.9
TGME49_240710-t26_1-p1	RNA recognition motif-containing protein	TGME49_240710	102231	2	2.05					1	5672.57	2	58118.2
TGME49_213770-t26_1-p1	Superkiller viralicidic activity 2 family 2, putative	TGME49_213770	135032	8	8.46					7	63715.4
TGME49_205320-t26_1-p1	hypothetical protein	TGME49_205320	70850	2	8.55							1	21250.9	1	42397.3
TGME49_243600-t26_1-p1	acetyltransferase, GNAT family protein	TGME49_243600	55426	2	3.49															2	63613.1
TGME49_288530-t26_1-p1	NOL1/NOP2/sun family protein	TGME49_288530	87638	3	4.48							3	63104.4
TGME49_212260-t26_1-p1	Sjogren's syndrome/scleroderma autoantigen 1 (Autoantigen p27) protein	TGME49_212260	37895	4	16.52													4	62789.2
TGME49_313370-t26_1-p1	hypothetical protein	TGME49_313370	174667	10	8.71			9	45738.3	3	16459.6							1	509.394
TGME49_273030-t26_1-p1	phosphoglycerate mutase family protein	TGME49_273030	34242	6	26.06													6	62540.4
TGME49_267390-t26_1-p1	DNA-directed RNA polymerase I RPAC1	TGME49_267390	38447	4	14.16													4	62419.2
TGME49_219710-t26_1-p1	hypothetical protein	TGME49_219710	200026	13	11.09	9	35677	1	4010.1	4	16867.3	2	5794.68
TGME49_289540-t26_1-p1	hypothetical protein	TGME49_289540	100517	4	4.27							4	62076.3
TGME49_316670-t26_1-p1	Toxoplasma gondii family D protein	TGME49_316670	72870	1	0.93	1	61313.3
TGME49_318260-t26_1-p1	transcription initiation factor TFIID subunit TAF5	TGME49_318260	117949	7	11.15			1	478.284	7	58675.8	1	2008.65
TGME49_314260-t26_1-p1	hypothetical protein	TGME49_314260	23795	1	6.57															1	60850.8
TGME49_210360-t26_1-p1	DEAD (Asp-Glu-Ala-Asp) box polypeptide 41 family protein	TGME49_210360	73228	7	13.55									7	60850.6
TGME49_235160-t26_1-p1	hypothetical protein	TGME49_235160	168307	6	5.04			2	6926.93	6	53922.6
TGME49_213350-t26_1-p1	ribosomal protein RPS15	TGME49_213350	17157	3	19.33															3	60515
TGME49_243440-t26_1-p1	histone lysine acetyltransferase GCN5-B	TGME49_243440	111545	7	9.4					1	12208	5	46451.7
TGME49_269710-t26_1-p1	hypothetical protein	TGME49_269710	170389	8	6.33			7	58145.6
TGME49_214970-t26_1-p1	DNA replication licensing factor, putative	TGME49_214970	117243	7	7.72					7	57979.2
TGME49_275810-t26_1-p1	ribosomal protein RPS10	TGME49_275810	17398	1	12.5															1	57584.9
TGME49_227290-t26_1-p1	histone deacetylase HDAC3	TGME49_227290	50458	3	11.53											3	56985.3
TGME49_280370-t26_1-p1	hypothetical protein	TGME49_280370	71866	5	9.92					1	1612.38			5	26087.2	3	26073.8	1	3152.4
TGME49_269900-t26_1-p1	WD domain, G-beta repeat-containing protein	TGME49_269900	106461	3	4.6							2	54569.2					1	1824.3
TGME49_276170-t26_1-p1	phosphatidylinositol 3- and 4-kinase	TGME49_276170	134544	6	5.05					6	48237.1			3	8065.13
TGME49_252290-t26_1-p1	importin alpha, putative	TGME49_252290	59360	2	3.85											2	56281.7
TGME49_214090-t26_1-p1	signal peptidase	TGME49_214090	203484	13	9.2	13	49184.9			2	6867.53
TGME49_293060-t26_1-p1	SPRY domain-containing protein	TGME49_293060	80291	4	8.38							4	55849.6
TGME49_216880-t26_1-p1	guanine nucleotide-binding protein	TGME49_216880	35147	3	14.95													3	55799.8
TGME49_294770-t26_1-p1	Armadillo/beta-catenin family repeat-containing protein	TGME49_294770	74145	3	4.51									3	55629
TGME49_245500-t26_1-p1	dipeptidyl peptidase iv (dpp iv) n-terminal region domain-containing protein	TGME49_245500	205660	14	11.1	13	49886.2	4	5080.67	1	557.582
TGME49_310490-t26_1-p1	ribosomal protein RPL27A	TGME49_310490	16344	2	13.61															2	55456.2
TGME49_204410-t26_1-p1	endonuclease/exonuclease/phosphatase family protein	TGME49_204410	121576	6	5.65							5	55176.2
TGME49_203080-t26_1-p1	RNA recognition motif-containing protein	TGME49_203080	32684	2	9.27													2	55154.5
TGME49_230520-t26_1-p1	cyclophilin 1, putative	TGME49_230520	26224	3	14.35															3	55055.2
TGME49_268570-t26_1-p1	zinc finger (CCCH type) motif-containing protein	TGME49_268570	47063	1	2.23											1	54997.1
TGME49_233820-t26_1-p1	DNA polymerase epsilon subunit B protein	TGME49_233820	65701	3	6.84									3	54025.7
TGME49_215740-t26_1-p1	notchless, putative	TGME49_215740	57710	3	5.88											2	53494.8
TGME49_217680-t26_1-p1	hypothetical protein	TGME49_217680	246147	14	7.7	13	48708.6	2	2049.29	1	2664.35
TGME49_237560-t26_1-p1	iron-sulfur cluster protein ISCU	TGME49_237560	23745	1	5.94															1	53111
TGME49_285950-t26_1-p1	hypothetical protein	TGME49_285950	91324	3	3.96							3	53026
TGME49_203390-t26_1-p1	CRAL/TRIO domain-containing protein	TGME49_203390	50481	4	10.75											3	49465.4	1	3311.91
TGME49_243710-t26_1-p1	t-complex protein beta subunit	TGME49_243710	61473	1	1.41											1	52763.4
TGME49_314540-t26_1-p1	hypothetical protein	TGME49_314540	66387	3	4.28									3	52660.9
TGME49_265180-t26_1-p1	hypothetical protein	TGME49_265180	48374	4	13.72											4	52574.6
TGME49_214770-t26_1-p1	small GTP binding protein rab1a, putative	TGME49_214770	22880	2	12.38															2	51894.2
TGME49_218610-t26_1-p1	ATPase (DUF699) protein	TGME49_218610	136211	4	4.01					4	51817.7
TGME49_264450-t26_1-p1	DNA topoisomerase III beta-1, putative	TGME49_264450	94886	4	7.16							4	51810.4
TGME49_217820-t26_1-p1	PCI domain-containing protein	TGME49_217820	51723	4	8.64											4	51404.8
TGME49_247220-t26_1-p1	nudix -type motif 9 isoform a family protein	TGME49_247220	60639	2	3.66											2	51388.1
TGME49_221522-t26_1-p1	adaptor complexes medium subunit family protein	TGME49_221522	61127	2	3.5													2	51316.3
TGME49_240640-t26_1-p1	casein kinase I	TGME49_240640	37960	2	7.72													2	51093.7
TGME49_218520-t26_1-p1	microneme protein MIC6	TGME49_218520	36669	3	13.75													2	49437.9
TGME49_228400-t26_1-p1	WD domain, G-beta repeat-containing protein	TGME49_228400	69954	3	5.06									3	49412.9
TGME49_313130-t26_1-p1	hypothetical protein	TGME49_313130	133693	4	2.41					4	48984.3
TGME49_310440-t26_1-p1	membrane occupation and recognition nexus protein MORN1	TGME49_310440	40890	2	9.64													2	48976.9
TGME49_233350-t26_1-p1	nuclear transport factor 2, putative	TGME49_233350	13833	1	10.4															1	48869.2
TGME49_305040-t26_1-p1	HEAT repeat-containing protein	TGME49_305040	125972	6	5.29					6	48592.1
TGME49_231040-t26_1-p1	3' exoribonuclease family, domain 1 domain-containing protein	TGME49_231040	35227	2	9.97													2	47976.7
TGME49_300000-t26_1-p1	ribosomal protein RPL18	TGME49_300000	21170	1	8.56															1	47571.2
TGME49_210408-t26_1-p1	HMG (high mobility group) box domain-containing protein	TGME49_210408	10682	1	9.57															1	47410.5
TGME49_231960-t26_1-p1	omega secalin, putative	TGME49_231960	201902	7	7.35	3	12306.1	4	17180.9	3	17136.3
TGME49_248250-t26_1-p1	translation initiation factor IF-2, putative	TGME49_248250	12567	2	17.86															2	46148.4
TGME49_221690-t26_1-p1	hypothetical protein	TGME49_221690	149621	4	2.98			1	636.023	4	45328.1
TGME49_205558-t26_1-p1	NAC domain-containing protein	TGME49_205558	20507	1	7.94															1	45723.6
TGME49_288040-t26_1-p1	hypothetical protein	TGME49_288040	138625	6	6.2			1	421.173	6	45129
TGME49_281570-t26_1-p1	hypothetical protein	TGME49_281570	52995	2	6											2	44711.7
TGME49_217050-t26_1-p1	ADA2-A transcriptional co-activator SAGA component	TGME49_217050	126320	3	3.66					3	44518.9
TGME49_310050-t26_1-p1	RNA recognition motif-containing protein	TGME49_310050	48844	1	2.4											1	43574.5
TGME49_231410-t26_1-p1	hypothetical protein	TGME49_231410	64728	2	4.9											2	43479.9
TGME49_279390-t26_1-p1	proliferation-associated protein 2G4, putative	TGME49_279390	50342	2	4.55									1	10892.5	2	32377.8
TGME49_236840-t26_1-p1	zinc finger (C-x8-C-x5-C-x3-H)-2, putative	TGME49_236840	41962	2	6.72											2	43229.5
TGME49_212820-t26_1-p1	ubiquitin family protein	TGME49_212820	119003	3	3.63					3	34041.4	1	9157.65
TGME49_267710-t26_1-p1	CPSF A subunit region protein	TGME49_267710	224032	9	4.85	8	41523	1	1339.41
TGME49_221950-t26_1-p1	splicesome-associated protein, putative	TGME49_221950	64912	3	5.56									3	42806.7
TGME49_209140-t26_1-p1	anti-silencing protein, ASF1 family protein	TGME49_209140	28900	1	3.35													1	42798.8
TGME49_242660-t26_1-p1	vacuolar sorting protein 35, putative	TGME49_242660	95636	2	3.52							2	42754.9
TGME49_295125-t26_1-p1	rhoptry protein ROP4	TGME49_295125	42389	5	12.3											1	42617.3
TGME49_314410-t26_1-p1	aquarius, putative	TGME49_314410	251136	13	7.38	12	42506
TGME49_218250-t26_1-p1	TAP42 family protein	TGME49_218250	56862	2	3.52											2	42232.1
TGME49_305240-t26_1-p1	XPA binding protein 2 family protein	TGME49_305240	111444	4	4.45					1	691.759	4	41370.3
TGME49_247470-t26_1-p1	nucleolar protein, putative	TGME49_247470	59940	3	6.9									3	41993.7
TGME49_254660-t26_1-p1	ankyrin repeat-containing protein	TGME49_254660	31832	2	13.45													2	41848.4
TGME49_314740-t26_1-p1	PSP protein	TGME49_314740	82306	3	4.35							2	41657.4
TGME49_218820-t26_1-p1	alba 2	TGME49_218820	15392	2	12.16															2	40797.7
TGME49_207720-t26_1-p1	hypothetical protein	TGME49_207720	177013	12	11.49			12	40473.2
TGME49_268870-t26_1-p1	tetratricopeptide repeat-containing protein	TGME49_268870	114007	2	2.23							2	40400.5
TGME49_285230-t26_1-p1	PRP38 family protein	TGME49_285230	68774	4	7.82									2	40395
TGME49_309810-t26_1-p1	ribosomal protein RPP2	TGME49_309810	11768	2	42.48															2	40232.2
TGME49_315530-t26_1-p1	hypothetical protein	TGME49_315530	126079	5	5.41					4	39596.1
TGME49_298610-t26_1-p1	GYF domain-containing protein	TGME49_298610	237896	10	5.92	4	3380.94	1	616.943	5	15531.4	3	8250.23	4	5671.84	3	4156.02	4	1855.15	1	80.6905
TGME49_246170-t26_1-p1	ARID/BRIGHT DNA binding domain-containing protein	TGME49_246170	286303	15	7.41	11	35319.7					1	2583.56	2	1575.67
TGME49_249860-t26_1-p1	hypothetical protein	TGME49_249860	90242	4	7.86							4	36811.6	1	2506.12
TGME49_258930-t26_1-p1	peptidylprolyl isomerase	TGME49_258930	13003	1	11.21															1	39108.8
TGME49_248300-t26_1-p1	hypothetical protein	TGME49_248300	100381	1	1.34	1	4765.46			1	34213.9
TGME49_230940-t26_1-p1	hypothetical protein	TGME49_230940	155051	5	5.12			3	8411.8			2	24219.8	2	6269.51
TGME49_315140-t26_1-p1	WD domain, G-beta repeat-containing protein	TGME49_315140	155381	8	9.03			8	30892.3	2	7947.6
TGME49_268580-t26_1-p1	hypothetical protein	TGME49_268580	53630	4	11.13											3	38735.6
TGME49_212250-t26_1-p1	XPG N-terminal domain-containing protein	TGME49_212250	86945	4	5.87									3	38546
TGME49_305050-t26_1-p1	calmodulin, putative	TGME49_305050	15277	1	6.77															1	38445.5
TGME49_269960-t26_1-p1	14-3-3 superfamily protein	TGME49_269960	51437	3	7.56											3	38358.8
TGME49_221410-t26_1-p1	actin-like protein ALP4	TGME49_221410	52155	2	5.92											2	38251.6
TGME49_276140-t26_1-p1	ADP ribosylation factor ARF1	TGME49_276140	62073	1	1.99															1	37854.4
TGME49_315690-t26_1-p1	DnaJ domain-containing protein	TGME49_315690	34154	2	8.53													2	37794
TGME49_291140-t26_1-p1	CCR4-Not complex component, Not1 protein	TGME49_291140	265868	8	3.83	6	18235.6	4	14516.3	1	4497.91
TGME49_262720-t26_1-p1	eukaryotic initiation factor-1A, putative	TGME49_262720	17936	2	18.24															2	36890.5
TGME49_300120-t26_1-p1	aminotransferase, class V superfamily protein	TGME49_300120	89642	5	8.15									5	36788.6
TGME49_279330-t26_1-p1	DEAD/DEAH box helicase family protein	TGME49_279330	51649	2	4.59											2	36530.7
TGME49_281610-t26_1-p1	hypothetical protein	TGME49_281610	32715	2	8.19													2	35439.3
TGME49_253520-t26_1-p1	U3 small nucleolar RNA-associated protein 6 protein	TGME49_253520	140504	7	6.35					5	35429.2
TGME49_204130-t26_1-p1	perforin-like protein PLP1	TGME49_204130	125506	5	5.17							4	35391.3
TGME49_286090-t26_1-p1	translation initiation factor SUI1, putative	TGME49_286090	12483	1	8.77															1	35135.1
TGME49_209600-t26_1-p1	hypothetical protein	TGME49_209600	50201	2	4.21					1	6179.44					1	28946.3
TGME49_244320-t26_1-p1	ribosomal protein RPL24	TGME49_244320	32693	2	10.31															2	35074.4
TGME49_255190-t26_1-p1	myosin C	TGME49_255190	132658	4	4.7					4	35043.3
TGME49_216750-t26_1-p1	Paf1/RNA polymerase II complex component LEO1	TGME49_216750	42580	2	6.63											2	35040.1
TGME49_270690-t26_1-p1	arginyl-tRNA synthetase	TGME49_270690	130256	5	5.45					5	35011.7
TGME49_246330-t26_1-p1	CRAL/TRIO domain-containing protein	TGME49_246330	48774	2	5.08											2	34935
TGME49_267480-t26_1-p1	tRNA (guanine(26)-N(2))-dimethyltransferase, putative	TGME49_267480	76065	3	5.31									3	34708.2
TGME49_222430-t26_1-p1	HECT-domain (ubiquitin-transferase) domain-containing protein	TGME49_222430	180697	11	7.89			11	34570.6
TGME49_224330-t26_1-p1	proteasome activator pa28 beta subunit protein	TGME49_224330	47945	2	7.45											2	34275.6
TGME49_246740-t26_1-p1	hypothetical protein	TGME49_246740	64741	3	8.12									2	33969.9
TGME49_298970-t26_1-p1	LSM3, U6 small nuclear RNA associated isoform 2 family protein	TGME49_298970	10752	2	28.12															2	33953.3
TGME49_212960-t26_1-p1	hypothetical protein	TGME49_212960	47540	2	5.28											2	33912.3
TGME49_224860-t26_1-p1	exosome component 2, putative	TGME49_224860	38735	2	6.8													2	33695
TGME49_295680-t26_1-p1	periodic tryptophan protein PWP2, putative	TGME49_295680	136774	3	2.61					2	16072.4	2	17611.3
TGME49_266460-t26_1-p1	small ubiquitin family modifier, putative	TGME49_266460	10319	1	10.99															1	33562.7
TGME49_211260-t26_1-p1	rhoptry kinase family protein ROP26 (incomplete catalytic triad)	TGME49_211260	47826	2	5.29											2	33303.8
TGME49_320300-t26_1-p1	SWI2/SNF2 Brahma-like putative	TGME49_320300	182331	6	4.55			3	24212.6	1	9010.86
TGME49_279450-t26_1-p1	adenylosuccinate synthetase, putative	TGME49_279450	50590	1	1.74											1	33096.5
TGME49_283590-t26_1-p1	NLI interacting factor family phosphatase	TGME49_283590	54123	1	1.6	1	33091.5
TGME49_250880-t26_1-p1	kinase, pfkB family protein	TGME49_250880	49957	2	7.74													2	33041.4
TGME49_275480-t26_1-p1	Myb family DNA-binding domain-containing protein	TGME49_275480	99259	3	4.84							3	32812.5
TGME49_270240-t26_1-p1	MAG1	TGME49_270240	49180	2	5.53											1	32610.4
TGME49_319950-t26_1-p1	rRNA-processing protein FCF1, putative	TGME49_319950	23022	1	6.47															1	32531.2
TGME49_203380-t26_1-p1	DnaJ domain-containing protein	TGME49_203380	81364	3	7.28							3	32105.7
TGME49_280560-t26_1-p1	selenide, water dikinase	TGME49_280560	137875	5	5.24	1	1213.19	1	1392.21	4	24668.4	1	2585.39	1	2119.69
TGME49_209430-t26_1-p1	40S ribosomal protein S4, putative	TGME49_209430	21546	4	28.42															3	31647.3
TGME49_265150-t26_1-p1	hypothetical protein	TGME49_265150	52649	3	10.69											3	31644.5
TGME49_229140-t26_1-p1	MaoC family domain-containing protein	TGME49_229140	35939	2	5.56													2	31616.8
TGME49_285720-t26_1-p1	ATP binding protein, putative	TGME49_285720	45735	2	4.64											2	31587.7
TGME49_211420-t26_1-p1	RNA recognition motif-containing protein	TGME49_211420	20398	1	5.85															1	31231.8
TGME49_248740-t26_1-p1	hypothetical protein	TGME49_248740	134977	7	7.82	1	3648.18	4	27421.7
TGME49_223070-t26_1-p1	hypothetical protein	TGME49_223070	23925	1	4.74															1	30899.1
TGME49_308890-t26_1-p1	transcription elongation factor SPT6	TGME49_308890	366029	13	4.88	11	27990.5			1	2856.09
TGME49_294730-t26_1-p1	hypothetical protein	TGME49_294730	217380	5	3.78	5	13004	2	4125.79	2	7044.31	2	5513.32			1	1089.81
TGME49_216120-t26_1-p1	hypothetical protein	TGME49_216120	90315	2	3.96							2	30668.2
TGME49_263080-t26_1-p1	hypothetical protein	TGME49_263080	14408	1	10.53															1	30505.1
TGME49_249850-t26_1-p1	GAP40 protein	TGME49_249850	43082	1	2.08	1	30353.7
TGME49_237220-t26_1-p1	DNA replication licensing factor Mcm7, putative	TGME49_237220	96875	3	3.58							3	30114.6
TGME49_294780-t26_1-p1	hypothetical protein	TGME49_294780	35063	4	16.72													4	30016.4
TGME49_270560-t26_1-p1	peptidyl-prolyl cis-trans isomerase family 1	TGME49_270560	20859	1	5.64															1	29948.6
TGME49_219290-t26_1-p1	F-actin-capping protein subunit beta, putative	TGME49_219290	36258	2	3.04													2	29907.9
TGME49_254120-t26_1-p1	autophagy-related protein 8 atg8, putative	TGME49_254120	14236	1	9.68															1	29822.6
TGME49_306910-t26_1-p1	hypothetical protein	TGME49_306910	55691	1	1.73											1	29732.4
TGME49_310860-t26_1-p1	U5 snRNP-specific protein	TGME49_310860	39274	2	6.27													2	28849.9
TGME49_239800-t26_1-p1	hypothetical protein	TGME49_239800	34073	3	13.27													2	28823.8
TGME49_267660-t26_1-p1	hypothetical protein	TGME49_267660	170100	8	7.13			8	28712.2
TGME49_291950-t26_1-p1	RNA recognition motif-containing protein	TGME49_291950	73853	2	4									2	28669
TGME49_304670-t26_1-p1	leucine rich repeat-containing protein	TGME49_304670	38295	2	7.4													2	28634.8
TGME49_209960-t26_1-p1	glycosyltransferase	TGME49_209960	188848	9	8.32			9	28445.6
TGME49_290890-t26_1-p1	carbonyl reductase 1, putative	TGME49_290890	44107	3	9.73													3	28427.4
TGME49_312110-t26_1-p1	apicoplast-associated thioredoxin family protein Atrx1	TGME49_312110	86834	3	4.05											3	28270.1
TGME49_269250-t26_1-p1	Mov34/MPN/PAD-1 family protein	TGME49_269250	38438	3	15.74													3	28101.1
TGME49_263090-t26_1-p1	14-3-3 protein	TGME49_263090	37174	1	2.48													1	28087.7
TGME49_249480-t26_1-p1	tetratricopeptide repeat-containing protein	TGME49_249480	126392	5	6.98					5	28066.2
TGME49_205340-t26_1-p1	ribosomal protein RPS12	TGME49_205340	15399	1	7.04															1	27930.9
TGME49_277740-t26_1-p1	zinc finger, C3HC4 type (RING finger) domain-containing protein	TGME49_277740	187626	1	0.79															1	27628.2
TGME49_213900-t26_1-p1	regulator of chromosome condensation RCC1	TGME49_213900	122605	3	3.64					3	27500.8
TGME49_310960-t26_1-p1	vacuolar atp synthase subunit f, putative	TGME49_310960	21658	2	10.77															2	27109.5
TGME49_270120-t26_1-p1	thioredoxin-like protein TLP1	TGME49_270120	26939	2	8.61															2	26878.6
TGME49_257090-t26_1-p1	NAC domain-containing protein	TGME49_257090	38782	2	6.41															1	26625.8
TGME49_212290-t26_1-p1	ribosomal protein RPS19	TGME49_212290	34993	2	7.67															2	26595.6
TGME49_311500-t26_1-p1	ThiF family protein	TGME49_311500	93425	2	3.55							2	26591.5
TGME49_250710-t26_1-p1	microneme protein MIC10	TGME49_250710	23113	1	6.06															1	26528.4
TGME49_270530-t26_1-p1	ubiquitin fusion degradation protein UFD1CY	TGME49_270530	36503	1	2.39													1	26421.1
TGME49_216730-t26_1-p1	MCM2/3/5 family protein	TGME49_216730	113220	4	5.45					4	26162
TGME49_222870-t26_1-p1	hypothetical protein	TGME49_222870	19857	1	6.04															1	26153.2
TGME49_288600-t26_1-p1	WD domain, G-beta repeat-containing protein	TGME49_288600	71772	2	4.57									2	25998
TGME49_214840-t26_1-p1	AP2 domain transcription factor AP2X-7	TGME49_214840	184051	2	1.34	1	3207.14	2	14445.3			1	8229.61
TGME49_252430-t26_1-p1	hypothetical protein	TGME49_252430	83842	3	4.95							3	25725
TGME49_269690-t26_1-p1	hypothetical protein	TGME49_269690	94304	2	2.66							2	18258.3	1	7382.94
TGME49_222900-t26_1-p1	phosphoserine phosphatase	TGME49_222900	190477	8	5.12	7	20480.2	2	4688.4	1	400.968
TGME49_321640-t26_1-p1	cell division protein CDC48AP	TGME49_321640	112893	7	8.52							5	25510.7
TGME49_242830-t26_1-p1	XRN 5'-3' exonuclease N-terminus protein	TGME49_242830	223765	11	6.86	5	9700.17	9	15456.6
TGME49_233460-t26_1-p1	SAG-related sequence SRS29B	TGME49_233460	34732	1	4.46													1	25058.3
TGME49_231630-t26_1-p1	alveolin domain containing intermediate filament IMC4	TGME49_231630	50172	2	4.87									1	10920.1					2	14128.6
TGME49_243930-t26_1-p1	hypothetical protein	TGME49_243930	101348	4	6.47									1	9983.12			3	15061.6
TGME49_242118-t26_1-p1	myosin-light-chain kinase	TGME49_242118	53050	1	2.45													1	24793.8
TGME49_293630-t26_1-p1	hypothetical protein	TGME49_293630	89576	1	0.86							1	24781.1
TGME49_288570-t26_1-p1	hypothetical protein	TGME49_288570	44887	1	3.12											1	24522.8
TGME49_291820-t26_1-p1	RNA helicase (UPF2 interacting domain) protein	TGME49_291820	163448	5	4.42					5	24476
TGME49_254220-t26_1-p1	hypothetical protein	TGME49_254220	84221	2	2.66							1	20581.1	1	3814.8
TGME49_321560-t26_1-p1	zinc knuckle domain-containing protein	TGME49_321560	85228	1	1.43							1	24219.8
TGME49_273905-t26_1-p1	hypothetical protein	TGME49_273905	57444	3	5.02													3	23884.7
TGME49_320450-t26_1-p1	ribosome biogenesis regulatory protein (rrs1) protein	TGME49_320450	35706	1	4.08													1	23872
TGME49_310820-t26_1-p1	SLU7 splicing factor, putative	TGME49_310820	61799	2	7.72									2	23859.4
TGME49_267600-t26_1-p1	FHA domain-containing protein	TGME49_267600	84417	2	3.06							2	23793.4
TGME49_238240-t26_1-p1	bystin protein	TGME49_238240	50445	3	9.71											3	23733.8
TGME49_260180-t26_1-p1	hypothetical protein	TGME49_260180	17941	1	8.92															1	23732.5
TGME49_314900-t26_1-p1	LisH protein	TGME49_314900	48702	1	2.78											1	23501.2
TGME49_272595-t26_1-p1	hypothetical protein	TGME49_272595	18906	1	4.65					1	23295.5
TGME49_258030-t26_1-p1	DNA polymerase	TGME49_258030	139494	6	5.44					6	23277.8
TGME49_237500-t26_1-p1	protein phosphatase 2C domain-containing protein	TGME49_237500	97305	2	3.3							2	23177
TGME49_260200-t26_1-p1	helicase associated domain (ha2) protein	TGME49_260200	141771	5	4.22					4	23108.7
TGME49_208830-t26_1-p1	hypothetical protein	TGME49_208830	54771	2	4.16											2	23084.3
TGME49_258240-t26_1-p1	chromodomain helicase DNA binding protein CHD1/SWI2/SNF2	TGME49_258240	271394	7	2.93	7	23040
TGME49_212950-t26_1-p1	ADP-ribosylation factor family protein 2, putative	TGME49_212950	21033	1	5.95															1	22993.9
TGME49_251930-t26_1-p1	enoyl-acyl carrier reductase ENR	TGME49_251930	43658	3	11.99													3	22873.1
TGME49_269770-t26_1-p1	WD domain, G-beta repeat-containing protein	TGME49_269770	121162	2	2.4					2	22837.5
TGME49_216930-t26_1-p1	cholinephosphate cytidylyltransferase	TGME49_216930	37688	1	3.65													1	22777.4
TGME49_250830-t26_1-p1	SAC3/GANP family protein	TGME49_250830	41073	1	2.93													1	22760.4
TGME49_250770-t26_1-p1	eukaryotic initiation factor-4A, putative	TGME49_250770	46673	1	2.43			1	8193.33	1	14306.9
TGME49_310010-t26_1-p1	rhoptry neck protein RON1	TGME49_310010	127433	5	5.27									3	22474.2
TGME49_279420-t26_1-p1	hypothetical protein	TGME49_279420	144942	4	4.36					4	22317.7
TGME49_235170-t26_1-p1	ATPase, AAA family protein	TGME49_235170	138106	3	2.46					3	22274
TGME49_248880-t26_1-p1	GTPase RAB7	TGME49_248880	47713	2	4.86															2	22037.4
TGME49_216810-t26_1-p1	5'-nucleotidase, C-terminal domain-containing protein	TGME49_216810	78348	2	3.66									2	21867.5
TGME49_203220-t26_1-p1	DEAD/DEAH box helicase domain-containing protein	TGME49_203220	122544	4	4.63					4	17525.4	1	4221.74
TGME49_212220-t26_1-p1	hypothetical protein	TGME49_212220	107977	2	3.36							2	20893.8	1	776.641
TGME49_229940-t26_1-p1	cyclophilin, putative	TGME49_229940	66212	1	1.7									1	21584.1
TGME49_232380-t26_1-p1	WD domain, G-beta repeat-containing protein	TGME49_232380	134254	3	2.93					3	21489.6
TGME49_262730-t26_1-p1	rhoptry protein ROP16	TGME49_262730	76216	1	1.7											1	21463.4
TGME49_205000-t26_1-p1	phosphoglycerate mutase family protein	TGME49_205000	74515	2	3.42									2	21420.1
TGME49_220260-t26_1-p1	hypothetical protein	TGME49_220260	63404	3	5.37									2	19460.6			1	1893.4
TGME49_214180-t26_1-p1	ENTH domain-containing protein	TGME49_214180	65928	3	7.89									2	18633.3					1	2166.97
TGME49_259710-t26_1-p1	protein kinase	TGME49_259710	28946	1	3.19															1	20744.5
TGME49_202770-t26_1-p1	RNA recognition motif-containing protein	TGME49_202770	55868	2	5.26											1	10300	1	10397.2
TGME49_310080-t26_1-p1	AMP-binding enzyme domain-containing protein	TGME49_310080	87848	2	3.17							2	20633.1
TGME49_312260-t26_1-p1	hypothetical protein	TGME49_312260	97345	2	3.28							2	20525.1
TGME49_227390-t26_1-p1	hypothetical protein	TGME49_227390	116123	4	5.91					4	20497.8
TGME49_263720-t26_1-p1	HMG (high mobility group) box domain-containing protein	TGME49_263720	16513	2	15.17															2	20467.5
TGME49_293700-t26_1-p1	WD domain, G-beta repeat-containing protein	TGME49_293700	52760	2	4.87											1	20356.9
TGME49_219460-t26_1-p1	hypothetical protein	TGME49_219460	136333	3	3.66			1	1467.14	3	18633.5
TGME49_270830-t26_1-p1	small nuclear ribonucleoprotein	TGME49_270830	17505	2	12.26															1	19877.8
TGME49_213830-t26_1-p1	Ufm1-conjugating enzyme 1, putative	TGME49_213830	17890	1	11.46															1	19769.2
TGME49_246100-t26_1-p1	phosducin, putative	TGME49_246100	36272	4	17.3													3	19741.3
TGME49_208350-t26_1-p1	hypothetical protein	TGME49_208350	40043	2	4.88													2	19668.9
TGME49_235980-t26_1-p1	ARIADNE family protein	TGME49_235980	74992	2	3.11									2	19638.2
TGME49_239480-t26_1-p1	RNB family domain-containing protein	TGME49_239480	129842	4	4.81					4	19597.4
TGME49_301390-t26_1-p1	ribosome biogenesis protein BOP1, putative	TGME49_301390	117373	2	2.85					2	19501.9
TGME49_213050-t26_1-p1	hypothetical protein	TGME49_213050	21191	1	4.69															1	19428.9
TGME49_226900-t26_1-p1	hypothetical protein	TGME49_226900	84474	1	1.57							1	19359.7
TGME49_304740-t26_1-p1	rhoptry kinase family protein ROP35	TGME49_304740	71272	3	4.38													3	19147
TGME49_223930-t26_1-p1	RNA recognition motif-containing protein	TGME49_223930	40672	2	2.62													2	19027.5
TGME49_272520-t26_1-p1	hypothetical protein	TGME49_272520	43708	1	2.99											1	18947.7
TGME49_252490-t26_1-p1	vacuolar protein sorting 29, putative	TGME49_252490	22278	2	12.81															1	18837.8
TGME49_260320-t26_1-p1	Noc2p family protein	TGME49_260320	115320	3	3.28					3	18643.3
TGME49_253040-t26_1-p1	actin-related protein ARP4A	TGME49_253040	77030	3	4.68									2	18632.3
TGME49_247350-t26_1-p1	thioredoxin domain-containing protein	TGME49_247350	33676	3	10.58															2	18246.3
TGME49_269180-t26_1-p1	MIF4G domain-containing protein	TGME49_269180	273011	6	4.31	3	2211.76	2	1192.6	4	9105.04	2	5079.66			1	605.619
TGME49_263560-t26_1-p1	hypothetical protein	TGME49_263560	61306	2	4.96											2	18107.2
TGME49_254480-t26_1-p1	WD domain, G-beta repeat-containing protein	TGME49_254480	86891	4	8.46							4	18045.2
TGME49_297420-t26_1-p1	beta-tubulin cofactor D, putative	TGME49_297420	220973	6	3.14	5	15223.6	1	2376.52					1	302.343
TGME49_208440-t26_1-p1	hypothetical protein	TGME49_208440	22311	1	5.37															1	17805.2
TGME49_232250-t26_1-p1	catalase	TGME49_232250	57298	1	2.79									1	9509.13	1	8264.67
TGME49_218410-t26_1-p1	ribosomal protein RPP0	TGME49_218410	34158	1	3.82													1	17772.4
TGME49_226910-t26_1-p1	Amylo-alpha-1,6-glucosidase	TGME49_226910	208019	7	4.57	1	654.7	7	16998.2
TGME49_243910-t26_1-p1	Cof family hydrolase subfamily protein	TGME49_243910	40719	1	2.41													1	17568.9
TGME49_216220-t26_1-p1	AP2 domain transcription factor AP2XI-5	TGME49_216220	89486	2	3.57									1	17424.9
TGME49_295410-t26_1-p1	transcription initiation factor TFIID complex subunit TAF6	TGME49_295410	92831	2	2.8							1	17404.9
TGME49_262960-t26_1-p1	U1 snRNP-associated protein Usp106, putative	TGME49_262960	44776	1	3.3											1	17373.4
TGME49_278900-t26_1-p1	protein kinase, putative	TGME49_278900	64043	2	3.51									1	17282.9
TGME49_239300-t26_1-p1	hypothetical protein	TGME49_239300	139185	3	2.76					3	17245.1
TGME49_272640-t26_1-p1	eukaryotic initiation factor-2B, epsilon subunit, putative	TGME49_272640	92849	2	3.61							2	16879.2
TGME49_243920-t26_1-p1	DNA replication licensing factor MCM5, putative	TGME49_243920	88212	1	1.26							1	16801.1
TGME49_304760-t26_1-p1	RNA recognition motif-containing protein	TGME49_304760	147175	2	2.47			1	6106	2	10571.7
TGME49_209240-t26_1-p1	RNA methyltransferase	TGME49_209240	51699	1	2.11											1	16666.7
TGME49_253440-t26_1-p1	cell-cycle-associated protein kinase SRPK, putative	TGME49_253440	187497	3	2.04	1	351.684	1	2039.09	1	5004.38							1	9264.33
TGME49_270510-t26_1-p1	asparaginyl-tRNA synthetase (NOB+tRNA synthase)	TGME49_270510	75005	4	7.4			2	9676.51					1	6836.67
TGME49_259950-t26_1-p1	carbonate dehydratase, eukaryotic-type domain-containing protein	TGME49_259950	95166	2	2.9									2	16084.8
TGME49_281620-t26_1-p1	aldo/keto reductase family oxidoreductase	TGME49_281620	56746	1	2.32													1	16053.5
TGME49_289950-t26_1-p1	hypothetical protein	TGME49_289950	60012	1	1.65									1	16004.7
TGME49_251850-t26_1-p1	serine/threonine protein phosphatase	TGME49_251850	117356	2	2.9							2	15772.7
TGME49_223710-t26_1-p1	tetratricopeptide repeat-containing protein	TGME49_223710	109194	2	2.28							2	15637.2
TGME49_210980-t26_1-p1	alternative splicing type 3 and, putative	TGME49_210980	64529	2	5.23									2	15544
TGME49_277270-t26_1-p1	NTPase II	TGME49_277270	37376	1	2.4									1	15443
TGME49_233000-t26_1-p1	KOW motif domain-containing protein	TGME49_233000	126247	3	2.82					1	3717.2	1	11662.3
TGME49_240840-t26_1-p1	histone lysine demethylase JmjC NO66	TGME49_240840	55992	1	1.57											1	15343.3
TGME49_275990-t26_1-p1	hypothetical protein	TGME49_275990	126244	1	1.11					1	13213.9							1	2021.92
TGME49_261260-t26_1-p1	histone lysine demethylase JMJD6a	TGME49_261260	71271	1	2.03									1	15232
TGME49_201270-t26_1-p1	hypothetical protein	TGME49_201270	103697	1	1.04											1	15200.1
TGME49_263420-t26_1-p1	ubiquitin-specific protease USP4	TGME49_263420	129788	2	2.65					2	15113.7
TGME49_294420-t26_1-p1	programmed cell death protein 2, c-terminal domain-containing protein	TGME49_294420	65230	3	9.25									3	14984.3
TGME49_290640-t26_1-p1	DNA mismatch repair protein MSH6-1, putative	TGME49_290640	171079	6	4.71			5	14975.7
TGME49_222970-t26_1-p1	inositol(myo)-1(or 4)-monophosphatase 2, putative	TGME49_222970	32348	1	5.05													1	14804.1
TGME49_225690-t26_1-p1	hypothetical protein	TGME49_225690	194254	3	2.04	3	14762.5
TGME49_230220-t26_1-p1	hypothetical protein	TGME49_230220	136711	2	1.77					2	14749.9
TGME49_314780-t26_1-p1	myosin G	TGME49_314780	227272	9	6.17	9	14641.3
TGME49_236890-t26_1-p1	hypothetical protein	TGME49_236890	24605	1	8.72															1	14400.6
TGME49_206670-t26_1-p1	hypothetical protein	TGME49_206670	218498	7	4.54	6	11888.5											1	2267.09
TGME49_214440-t26_1-p1	4'-phosphopantetheinyl transferase superfamily protein	TGME49_214440	48506	2	5.26													1	14059.4
TGME49_313230-t26_1-p1	eukaryotic initiation factor-2, alpha subunit	TGME49_313230	39126	1	2.59													1	13956.1
TGME49_244460-t26_1-p1	hypothetical protein	TGME49_244460	127300	2	3.55					2	12117.9			1	1556.98
TGME49_201140-t26_1-p1	hypothetical protein	TGME49_201140	113817	2	2.76					2	13583.2
TGME49_237520-t26_1-p1	hypothetical protein	TGME49_237520	114771	3	3.31					3	13099.6					1	479.259
TGME49_243460-t26_1-p1	hypothetical protein	TGME49_243460	209866	7	6.66	7	13568.7
TGME49_253430-t26_1-p1	asparagine synthetase, putative	TGME49_253430	65868	2	4.59									1	1305.06	2	12259.5
TGME49_313665-t26_1-p1	hypothetical protein	TGME49_313665	49488	2	6.77											2	13540.4
TGME49_313100-t26_1-p1	signal recognition particle SRP54 protein	TGME49_313100	62791	1	1.72															1	13518.3
TGME49_249680-t26_1-p1	RNA polymerase II associated Paf1 complex component PAF1	TGME49_249680	61780	1	1.9									1	13482.6
TGME49_309370-t26_1-p1	adaptin n terminal region domain-containing protein	TGME49_309370	144045	2	1.48					1	5328.5	2	8120.95
TGME49_270865-t26_1-p1	adenylate cyclase, putative	TGME49_270865	222746	5	3.43	5	13373.7
TGME49_269010-t26_1-p1	AP2 domain transcription factor AP2VIII-7	TGME49_269010	89261	1	1.49							1	13314.3
TGME49_252420-t26_1-p1	histone arginine methyltransferase PRMT3	TGME49_252420	87684	1	1							1	13308.2
TGME49_236140-t26_1-p1	hypothetical protein	TGME49_236140	110528	2	4.07							2	13277.6
TGME49_306330-t26_1-p1	phospholipase	TGME49_306330	63256	1	1.72									1	13250
TGME49_270930-t26_1-p1	hypothetical protein	TGME49_270930	317119	8	3.17	8	12348.3	1	896.262
TGME49_315720-t26_1-p1	Smg-4/UPF3 family protein	TGME49_315720	62257	3	8.42									3	13195.8
TGME49_216900-t26_1-p1	cytokine induced apoptosis inhibitor 1 family protein	TGME49_216900	47563	1	2.71													1	13134.3
TGME49_222660-t26_1-p1	leucine rich repeat-containing protein	TGME49_222660	192585	5	3.28			5	13117.2
TGME49_224990-t26_1-p1	hypothetical protein	TGME49_224990	17098	1	8.44															1	13112.9
TGME49_233010-t26_1-p1	cell-cycle-assocaited protein kinase ERK7, putative	TGME49_233010	73113	1	1.18									1	13088.6
TGME49_254510-t26_1-p1	ankyrin repeat-containing protein	TGME49_254510	65956	1	2.07									1	12926
TGME49_262140-t26_1-p1	chain a, pp2a-specific methylesterase apo form (pme), putative	TGME49_262140	49990	1	3.32											1	12911.2
TGME49_310900-t26_1-p1	AP2 domain transcription factor AP2XI-2	TGME49_310900	232852	9	6.42	8	11850.7	1	1022.95
TGME49_207240-t26_1-p1	hypothetical protein	TGME49_207240	11948	1	12.96															1	12757.9
TGME49_313670-t26_1-p1	adaptin n terminal region domain-containing protein	TGME49_313670	107006	2	2.87							2	12738.5
TGME49_225990-t26_1-p1	acyl transferase domain-containing protein	TGME49_225990	53257	1	1.99													1	12724.5
TGME49_231940-t26_1-p1	ThiF family protein	TGME49_231940	36031	1	3.85											1	12665.5
TGME49_272030-t26_1-p1	kelch repeat-containing protein	TGME49_272030	90418	2	2.18							2	12637.6
TGME49_251880-t26_1-p1	tRNA synthetases class I family protein	TGME49_251880	60170	1	1.85											1	12621.9
TGME49_218530-t26_1-p1	proteasome-interacting thioredoxin domain-containing protein	TGME49_218530	38083	1	4.64															1	12520.9
TGME49_314970-t26_1-p1	root hair defective 3 gtp-binding protein (rhd3) protein	TGME49_314970	98254	1	0.9							1	12501.5
TGME49_220490-t26_1-p1	pre-rRNA-processing protein PNO1, putative	TGME49_220490	32825	1	3.05													1	12271.3
TGME49_289730-t26_1-p1	Pep3/Vps18/deep orange family protein	TGME49_289730	128290	2	1.99							2	12175.9
TGME49_240910-t26_1-p1	hypothetical protein	TGME49_240910	214924	1	0.94											1	12051.8
TGME49_287170-t26_1-p1	hypothetical protein	TGME49_287170	38522	1	4.13											1	11985.4
TGME49_265850-t26_1-p1	hypothetical protein	TGME49_265850	215405	8	5.26	7	11888
TGME49_258160-t26_1-p1	carbohydrate kinase	TGME49_258160	54724	1	2.17											1	11866
TGME49_246090-t26_1-p1	hypothetical protein	TGME49_246090	104887	2	3.16					2	11860.7
TGME49_236080-t26_1-p1	replication factor-a protein 1 (rpa1) subfamily protein	TGME49_236080	98462	1	1.44							1	11787.6
TGME49_249360-t26_1-p1	RED family protein	TGME49_249360	66928	1	1.54									1	11783.2
TGME49_305560-t26_1-p1	Vps51/Vps67 protein	TGME49_305560	130279	4	5.27					4	11764.7
TGME49_266970-t26_1-p1	hypothetical protein	TGME49_266970	35139	1	3.59													1	11732.7
TGME49_250750-t26_1-p1	tRNA (uracil-5-)-methyltransferase	TGME49_250750	121269	2	1.88					1	11730.6
TGME49_243580-t26_1-p1	Hit family protein involved in cell-cycle regulation, putative	TGME49_243580	30516	1	5.07															1	11708.3
TGME49_289190-t26_1-p1	tetratricopeptide repeat-containing protein	TGME49_289190	151871	2	1.5					2	10424.9			1	1213.09
TGME49_227800-t26_1-p1	EF hand domain-containing protein	TGME49_227800	135825	1	0.94					1	11613.5
TGME49_307590-t26_1-p1	hypothetical protein	TGME49_307590	92380	1	1.86			1	11559.2
TGME49_306400-t26_1-p1	hypothetical protein	TGME49_306400	151366	2	1.79			2	11522.6
TGME49_269650-t26_1-p1	FFD and TFG box motifs protein	TGME49_269650	51441	2	5.89													2	11445
TGME49_290920-t26_1-p1	oxidoreductase, 2OG-Fe(II) oxygenase family protein	TGME49_290920	100844	2	3							1	8422.24					1	2967.28
TGME49_321440-t26_1-p1	SWI2/SNF2 ISWI-like SANT	TGME49_321440	140165	4	4.16					3	11345.3
TGME49_221660-t26_1-p1	DEAD/DEAH box helicase domain-containing protein	TGME49_221660	202183	5	3.41	5	9762.69	1	1577.97
TGME49_290730-t26_1-p1	CS domain-containing protein	TGME49_290730	41901	1	5													1	11302.9
TGME49_273520-t26_1-p1	PCI domain-containing protein	TGME49_273520	67341	3	4.99			1	3538.55	1	5677.53			1	2002.11
TGME49_291180-t26_1-p1	hypothetical protein	TGME49_291180	574474	19	5.1	8	3588.35	11	7580.18
TGME49_271740-t26_1-p1	hypothetical protein	TGME49_271740	215388	5	2.62	5	11163.8
TGME49_258740-t26_1-p1	eukaryotic initiation factor-2A, putative	TGME49_258740	64654	2	3.37											2	11155.5
TGME49_316330-t26_1-p1	superoxide dismutase SOD2	TGME49_316330	31463	1	6.62															1	11124.1
TGME49_202460-t26_1-p1	diacylglycerol kinase accessory domain (presumed) domain-containing protein	TGME49_202460	72936	1	2.06									1	10942.6
TGME49_244290-t26_1-p1	adapter-related protein	TGME49_244290	119953	2	2.51							2	10925
TGME49_255350-t26_1-p1	ATPase, putative	TGME49_255350	71994	3	8.08									3	10871
TGME49_220890-t26_1-p1	hypothetical protein	TGME49_220890	51196	2	5.07													2	10861.3
TGME49_219682-t26_1-p1	pyruvate dehydrogenase kinase, putative	TGME49_219682	82162	1	1.19									1	10804.3
TGME49_320100-t26_1-p1	RNA recognition motif-containing protein	TGME49_320100	128922	2	1.73					2	10752.1
TGME49_313270-t26_1-p1	hypothetical protein	TGME49_313270	281362	4	2.47	2	1993.13	1	755.399	2	4513.91	1	3386.07
TGME49_316180-t26_1-p1	hypothetical protein	TGME49_316180	91133	2	2.77							2	10636.9
TGME49_258660-t26_1-p1	rhoptry protein ROP6	TGME49_258660	51403	1	3.33													1	10620.1
TGME49_294180-t26_1-p1	tRNA -methyltransferase family protein	TGME49_294180	36313	1	2.15													1	10602.9
TGME49_310400-t26_1-p1	glycosyl transferase family 8 protein	TGME49_310400	38717	2	9.86													2	10587.9
TGME49_316520-t26_1-p1	1,4-alpha-glucan-branching enzyme	TGME49_316520	109787	2	2.88							2	10565.5
TGME49_312230-t26_1-p1	DNA topoisomerase 2, putative	TGME49_312230	185767	4	3.38			4	10445.6
TGME49_224980-t26_1-p1	hypothetical protein	TGME49_224980	122255	2	2.96					2	10329.6
TGME49_213392-t26_1-p1	surface antigen repeat-containing protein	TGME49_213392	253281	5	2.46			5	10278.3
TGME49_319870-t26_1-p1	ubiquitin-conjugating enzyme subfamily protein	TGME49_319870	35024	1	3.54															1	10190.8
TGME49_220100-t26_1-p1	phosphoribosylpyrophosphate synthetase	TGME49_220100	61019	1	1.8													1	10134.3
TGME49_207060-t26_1-p1	ribonucleoside-diphosphate reductase small subunit	TGME49_207060	44585	2	7.16													2	10075.1
TGME49_253090-t26_1-p1	DEAD/DEAH box helicase domain-containing protein	TGME49_253090	122312	2	2.16									2	9944.48
TGME49_290030-t26_1-p1	hypothetical protein	TGME49_290030	26566	1	3.93															1	9886.76
TGME49_273560-t26_1-p1	kinesin heavy chain, putative	TGME49_273560	181383	4	2.44	1	913.409	3	8938.57
TGME49_225260-t26_1-p1	DNA-directed RNA polymerase II RPB1	TGME49_225260	209001	5	3.54			4	9712.66
TGME49_282140-t26_1-p1	cwf21 protein	TGME49_282140	80282	1	2.09							1	9662.42
TGME49_264640-t26_1-p1	bromodomain-containing protein	TGME49_264640	140476	2	1.55			2	9595.4
TGME49_222100-t26_1-p1	hypothetical protein	TGME49_222100	128318	2	1.84											2	9581.43
TGME49_221670-t26_1-p1	transcriptional elongation factor FACT140	TGME49_221670	134599	3	3.59					3	9567.83
TGME49_264690-t26_1-p1	cyclin 4, putative	TGME49_264690	69965	1	1.89									1	9550.5
TGME49_257150-t26_1-p1	NOT2 / NOT3 / NOT5 family protein	TGME49_257150	53120	1	3.41											1	9502.41
TGME49_209800-t26_1-p1	formate/nitrite transporter protein	TGME49_209800	44290	1	4.85													1	9497.5
TGME49_240660-t26_1-p1	hypothetical protein	TGME49_240660	54603	1	2.48											1	9439.46
TGME49_299070-t26_1-p1	pyruvate kinase PyKII	TGME49_299070	106814	3	4.36									2	9373.49
TGME49_219860-t26_1-p1	replication licensing factor, putative	TGME49_219860	108256	2	3.7							1	9350.03
TGME49_221460-t26_1-p1	phosphoglycerate mutase family protein	TGME49_221460	48720	2	6.21											2	9331.39
TGME49_247450-t26_1-p1	hypothetical protein	TGME49_247450	245871	4	2.87	4	6795.09			2	1568.21	1	935.11
TGME49_220610-t26_1-p1	protein phosphatase 2C domain-containing protein	TGME49_220610	58057	2	4.38													2	9234.31
TGME49_310950-t26_1-p1	AP2 domain transcription factor AP2XI-3	TGME49_310950	135101	1	0.64					1	9063.01
TGME49_247550-t26_1-p1	heat shock protein HSP60	TGME49_247550	60914	1	2.09									1	9034.7
TGME49_201800-t26_1-p1	hypothetical protein	TGME49_201800	28527	1	3.75															1	8993.38
TGME49_226640-t26_1-p1	zinc binding protein, putative	TGME49_226640	14669	1	6.92															1	8924.78
TGME49_240700-t26_1-p1	ubiquitin family protein	TGME49_240700	65667	1	1.98									1	8856.16
TGME49_273150-t26_1-p1	zinc finger, C3HC4 type (RING finger) domain-containing protein	TGME49_273150	78603	1	2.55							1	8671.95
TGME49_278470-t26_1-p1	hypothetical protein	TGME49_278470	66650	1	2.36									1	8671.79
TGME49_257560-t26_1-p1	WD domain, G-beta repeat-containing protein	TGME49_257560	109902	1	1.18					1	8624.92
TGME49_270320-t26_1-p1	protein phosphatase 2C domain-containing protein	TGME49_270320	58674	1	2.23											1	8585.48
TGME49_266280-t26_1-p1	HEAT repeat-containing protein	TGME49_266280	101725	1	1.31							1	8553.02
TGME49_230340-t26_1-p1	hypothetical protein	TGME49_230340	102408	1	0.95							1	8488.23
TGME49_271440-t26_1-p1	NPL4 family protein	TGME49_271440	55803	1	1.99											1	8440.24
TGME49_320670-t26_1-p1	vacuolar protein sorting 16, putative	TGME49_320670	101500	1	1.3							1	8370.88
TGME49_289380-t26_1-p1	hypothetical protein	TGME49_289380	100247	2	3.15							2	8368.32
TGME49_270980-t26_1-p1	phosphoglycerate mutase family protein	TGME49_270980	79364	1	2.34							1	8347.64
TGME49_238510-t26_1-p1	hypothetical protein	TGME49_238510	116255	1	0.83					1	8345.44
TGME49_232410-t26_1-p1	PDI family protein	TGME49_232410	24909	2	12.27															1	8345.08
TGME49_204160-t26_1-p1	GYF domain-containing protein	TGME49_204160	189982	6	3.84			5	7804.32	1	490.467
TGME49_202870-t26_1-p1	SAP domain-containing protein	TGME49_202870	55645	1	2.37													1	8282.7
TGME49_293230-t26_1-p1	hypothetical protein	TGME49_293230	50117	1	2.83											1	8220.37
TGME49_225000-t26_1-p1	hypothetical protein	TGME49_225000	154663	1	0.68			1	8129.42
TGME49_286630-t26_1-p1	redoxin domain-containing protein	TGME49_286630	31107	1	4.79															1	8073.65
TGME49_255680-t26_1-p1	YbaK/proline-tRNA ligase associated domain-containing protein	TGME49_255680	28308	1	3.05													1	8066.88
TGME49_254940-t26_1-p1	MIF4G domain-containing protein	TGME49_254940	391817	5	1.83	3	3450.74	3	4192.84			1	399.096
TGME49_292200-t26_1-p1	RNA recognition motif-containing protein	TGME49_292200	222415	3	1.59	3	5422.48			1	2542.09
TGME49_262620-t26_1-p1	RNA recognition motif-containing protein	TGME49_262620	31760	1	3.41															1	7931.94
TGME49_277080-t26_1-p1	microneme protein MIC5	TGME49_277080	19872	1	7.73															1	7877.1
TGME49_231480-t26_1-p1	GCN1, putative	TGME49_231480	362621	6	2.14	6	7531.82	1	327.677
TGME49_297530-t26_1-p1	DNA-directed RNA polymerase I RPA2	TGME49_297530	153521	2	1.8					2	7671.38
TGME49_215560-t26_1-p1	histone arginine methyltransferase PRMT5	TGME49_215560	107092	1	1.23							1	7620.29
TGME49_312270-t26_1-p1	rhoptry protein ROP13	TGME49_312270	44802	1	3													1	7598.8
TGME49_318620-t26_1-p1	RNA-directed RNA polymerase	TGME49_318620	137057	2	1.36					1	7540.27
TGME49_220930-t26_1-p1	hypothetical protein	TGME49_220930	74168	1	1.75									1	747.818	1	6753.38
TGME49_253370-t26_1-p1	hypothetical protein	TGME49_253370	216510	3	1.82			3	7479.63
TGME49_263440-t26_1-p1	hypothetical protein	TGME49_263440	66523	2	3.83									2	7458.21
TGME49_214760-t26_1-p1	erythronate-4-phosphate dehydrogenase domain-containing protein	TGME49_214760	42224	1	3.66													1	7375.8
TGME49_265250-t26_1-p1	RNA recognition motif-containing protein	TGME49_265250	160180	3	2.69			2	5141.94			1	2160.34
TGME49_306060-t26_1-p1	rhoptry neck protein RON8	TGME49_306060	328900	4	2.01	4	7279.96
TGME49_271280-t26_1-p1	60S ribosome subunit biogenesis protein NIP7, putative	TGME49_271280	20461	1	6.08															1	7276.73
TGME49_319560-t26_1-p1	microneme protein MIC3	TGME49_319560	40528	1	5.22													1	7259.5
TGME49_218950-t26_1-p1	hypothetical protein	TGME49_218950	126593	1	0.77					1	7234.26
TGME49_208390-t26_1-p1	hypothetical protein	TGME49_208390	47053	1	3.54											1	7086.98
TGME49_211470-t26_1-p1	Fcf2 pre-rRNA processing protein	TGME49_211470	48309	1	2.2											1	7064.7
TGME49_314422-t26_1-p1	rhodanese family domain-containing protein	TGME49_314422	67595	1	2.09															1	7037.61
TGME49_293670-t26_1-p1	transcription elongation factor A TFIIS	TGME49_293670	45533	1	3.11											1	6993.82
TGME49_319350-t26_1-p1	SAG-related sequence SRS17B	TGME49_319350	39375	1	3.69													1	6932.11
TGME49_270960-t26_1-p1	hypothetical protein	TGME49_270960	138428	2	1.53			1	463.157	2	6428.76
TGME49_234360-t26_1-p1	DNA topoisomerase I, putative	TGME49_234360	99706	3	5.17							3	6870.44
TGME49_267100-t26_1-p1	protein phosphatase 2C domain-containing protein	TGME49_267100	96718	1	1.21							1	6864.42
TGME49_229790-t26_1-p1	hypothetical protein	TGME49_229790	113373	2	2.75							2	6791.5
TGME49_264460-t26_1-p1	DNA-directed RNA polymerase III RPC5	TGME49_264460	90300	1	1.45							1	6759.87
TGME49_206510-t26_1-p1	toxolysin TLN4	TGME49_206510	246741	1	0.47											1	6727.29
TGME49_314280-t26_1-p1	AAR2 protein	TGME49_314280	71687	2	3.22									2	6698.22
TGME49_293320-t26_1-p1	hypothetical protein	TGME49_293320	198216	6	5.22			4	6682
TGME49_234560-t26_1-p1	hypothetical protein	TGME49_234560	138715	3	2.88					2	6603.3
TGME49_252360-t26_1-p1	rhoptry kinase family protein ROP24 (incomplete catalytic triad)	TGME49_252360	60795	1	3.36											1	6573.94
TGME49_265010-t26_1-p1	glutamate 5-kinase domain-containing protein	TGME49_265010	101291	2	2.58							2	6569.62
TGME49_249970-t26_1-p1	hypothetical protein	TGME49_249970	24712	1	3.93															1	6561.59
TGME49_290200-t26_1-p1	NAD/NADP octopine/nopaline dehydrogenase, alpha-helical domain-containing protein	TGME49_290200	48073	1	2.99							1	6519.93
TGME49_265410-t26_1-p1	G-protein beta WD-40 repeat containing protein	TGME49_265410	67366	1	2.8									1	6500.66
TGME49_213740-t26_1-p1	hypothetical protein	TGME49_213740	91858	1	0.95							1	6499.9
TGME49_254300-t26_1-p1	hypothetical protein	TGME49_254300	196444	3	2.03	1	751.776	3	5721.04
TGME49_219850-t26_1-p1	prolyl-tRNA synthetase (ProRS)	TGME49_219850	93479	2	3.86							1	5208.4	1	1198.58
TGME49_239070-t26_1-p1	hypothetical protein	TGME49_239070	65615	1	2.21									1	6398.4
TGME49_246030-t26_1-p1	mediator complex subunit MED17	TGME49_246030	96477	1	1.45							1	6348.13
TGME49_303450-t26_1-p1	coatomer gamma subunit	TGME49_303450	33580	1	3.97							1	6306.77
TGME49_291640-t26_1-p1	aspartate carbamoyltransferase	TGME49_291640	46921	1	2.84													1	6302.08
TGME49_253020-t26_1-p1	hypothetical protein	TGME49_253020	51622	2	6.44											2	6296.74
TGME49_234520-t26_1-p1	U2 snRNP auxilliary factor, large subunit, splicing factor subfamily protein	TGME49_234520	59989	1	2.53											1	6214.29
TGME49_218720-t26_1-p1	calcium-dependent protein kinase CDPK6	TGME49_218720	160932	2	1.9							2	6191.45
TGME49_294440-t26_1-p1	NOL1/NOP2/sun family protein	TGME49_294440	105738	1	1.34							1	6120.06
TGME49_316540-t26_1-p1	IMC sub-compartment protein ISP3	TGME49_316540	18391	1	6.1															1	6068.31
TGME49_320630-t26_1-p1	phosphotransferase enzyme family protein	TGME49_320630	69384	1	2.38									1	6035.88
TGME49_242625-t26_1-p1	ATPase family associated with various cellular activities (AAA) subfamily protein	TGME49_242625	976090	1	0.08							1	5925.69
TGME49_204340-t26_1-p1	hypothetical protein	TGME49_204340	97095	1	1.48							1	5879.32
TGME49_227900-t26_1-p1	AP2 domain transcription factor AP2X-1	TGME49_227900	133848	2	2.4					2	5842.93
TGME49_223760-t26_1-p1	hypothetical protein	TGME49_223760	168704	2	2.2			2	5813.33
TGME49_285660-t26_1-p1	DEAD/DEAH box helicase domain-containing protein	TGME49_285660	175966	3	2.74			3	5762.69
TGME49_254420-t26_1-p1	phospholipase, patatin family protein	TGME49_254420	127354	1	0.77											1	5731.59
TGME49_318720-t26_1-p1	pyridoxal phosphate enzyme, YggS family protein	TGME49_318720	60645	1	2.37													1	5601.21
TGME49_290340-t26_1-p1	HEAT repeat-containing protein	TGME49_290340	47960	1	1.81													1	5589.64
TGME49_260250-t26_1-p1	cyclin domain protein, cyclin H family protein	TGME49_260250	65648	1	1.83									1	5576.77
TGME49_265840-t26_1-p1	hypothetical protein	TGME49_265840	149066	2	3.06			2	5563.96
TGME49_225310-t26_1-p1	ARF1-directed GTPase-activating protein, putative	TGME49_225310	52472	1	2.59											1	5531.99
TGME49_257380-t26_1-p1	hypothetical protein	TGME49_257380	23919	1	8.26															1	5505.96
TGME49_203760-t26_1-p1	hypothetical protein	TGME49_203760	151204	2	2.15					2	5491.8
TGME49_318170-t26_1-p1	hypothetical protein	TGME49_318170	43742	1	5.11													1	5487.79
TGME49_226040-t26_1-p1	EF hand domain-containing protein	TGME49_226040	18984	1	4.73															1	5468.89
TGME49_295070-t26_1-p1	helicase associated domain (ha2) protein	TGME49_295070	175254	4	3.37			4	5426.97
TGME49_226510-t26_1-p1	Sec23/Sec24 trunk domain-containing protein	TGME49_226510	165235	2	1.62					1	5405.07
TGME49_263050-t26_1-p1	ribosomal protein RPL13	TGME49_263050	39682	1	3.1													1	5264.52
TGME49_260600-t26_1-p1	Pumilio-family RNA binding repeat-containing protein	TGME49_260600	172518	1	0.84			1	5142.08
TGME49_214800-t26_1-p1	hypothetical protein	TGME49_214800	82464	1	1.19							1	5055.98
TGME49_310640-t26_1-p1	phosphorylase family protein	TGME49_310640	33043	1	4.95													1	5048.9
TGME49_290270-t26_1-p1	SPRY domain-containing protein	TGME49_290270	70329	1	2.49									1	4974.31
TGME49_312840-t26_1-p1	hypothetical protein	TGME49_312840	119652	1	0.91							1	4974.04
TGME49_312280-t26_1-p1	pre-mRNA-splicing factor ATP-dependent RNA helicase, putative	TGME49_312280	136385	1	1.49					1	4959.24
TGME49_262450-t26_1-p1	hypothetical protein	TGME49_262450	176281	2	1.1			2	4935.71
TGME49_315080-t26_1-p1	hypothetical protein	TGME49_315080	165814	2	1.38			2	4915.07
TGME49_213730-t26_1-p1	lanthionine synthetase C family protein	TGME49_213730	46400	1	4.48													1	4896.9
TGME49_233020-t26_1-p1	Not1 N-terminal domain, CCR4-Not complex component protein	TGME49_233020	83854	1	2.7							1	4837.62
TGME49_203950-t26_1-p1	Myb family DNA-binding domain-containing protein	TGME49_203950	264435	1	0.44	1	2124.23	1	2668.57
TGME49_239400-t26_1-p1	hypothetical protein	TGME49_239400	133887	1	0.79					1	4738.66
TGME49_311360-t26_1-p1	protein kinase G AGC kinase family member PKG	TGME49_311360	111242	1	1.61							1	4724.44
TGME49_241610-t26_1-p1	hypothetical protein	TGME49_241610	55458	1	3.79									1	4652.29
TGME49_278750-t26_1-p1	AT hook motif domain-containing protein	TGME49_278750	65012	1	1.5									1	4639.71
TGME49_254530-t26_1-p1	hypothetical protein	TGME49_254530	196258	1	0.32													1	4629.88
TGME49_246978-t26_1-p1	hypothetical protein	TGME49_246978	160891	3	2.67					3	4618.32
TGME49_222050-t26_1-p1	hypothetical protein	TGME49_222050	155997	2	1.69			2	4088.78					1	511.17
TGME49_313380-t26_1-p1	hypothetical protein	TGME49_313380	31513	1	5.11													1	4531.96
TGME49_228460-t26_1-p1	hypothetical protein	TGME49_228460	130686	1	0.59					1	4477.33
TGME49_276890-t26_1-p1	hypothetical protein	TGME49_276890	129509	1	0.94					1	4463.01
TGME49_275490-t26_1-p1	hypothetical protein	TGME49_275490	217118	4	2.5	4	4459.04
TGME49_293380-t26_1-p1	histone lysine acetyltransferase HAT1	TGME49_293380	82423	1	2.29							1	4458.45
TGME49_320160-t26_1-p1	hypothetical protein	TGME49_320160	201726	3	2.85	3	4444.09
TGME49_218960-t26_1-p1	AP2 domain transcription factor AP2XII-1	TGME49_218960	247703	3	1.53	3	3929.52	1	494.423
TGME49_211670-t26_1-p1	S1 RNA binding domain-containing protein	TGME49_211670	42217	2	7.94											1	4404.19
TGME49_320690-t26_1-p1	gamma-soluble NSF attachment protein, putative	TGME49_320690	44558	1	1.97													1	4395.38
TGME49_254690-t26_1-p1	phospholipase/carboxylesterase	TGME49_254690	54236	2	4.43											2	4371.63
TGME49_320030-t26_1-p1	hypothetical protein	TGME49_320030	81715	1	1.73							1	4364.78
TGME49_288800-t26_1-p1	endonuclease/exonuclease/phosphatase family protein	TGME49_288800	91411	1	2.97							1	4347.51
TGME49_310430-t26_1-p1	Hsp90 domain-containing protein	TGME49_310430	120786	1	1.55							1	4335.89
TGME49_312200-t26_1-p1	serine/threonine protein phosphatase	TGME49_312200	61537	2	4.74											1	4281.43
TGME49_301250-t26_1-p1	hypothetical protein	TGME49_301250	96404	1	1.76							1	4228.91
TGME49_202230-t26_1-p1	histone deacetylase HDAC5	TGME49_202230	154036	1	0.48					1	4190.42
TGME49_251630-t26_1-p1	slc30a2 protein	TGME49_251630	99616	1	2.07									1	4182.57
TGME49_226030-t26_1-p1	AGC kinase	TGME49_226030	39411	1	4.66													1	4149.77
TGME49_229690-t26_1-p1	autophagy-related protein 7 atg7, putative	TGME49_229690	143701	1	0.6					1	4133.68
TGME49_209130-t26_1-p1	regulator of chromosome condensation (RCC1) repeat-containing protein	TGME49_209130	101003	1	1.4							1	4078.47
TGME49_227990-t26_1-p1	hypothetical protein	TGME49_227990	99344	1	1.33							1	4053.08
TGME49_217790-t26_1-p1	S1 RNA binding domain-containing protein	TGME49_217790	268151	4	2.59	4	3930.33
TGME49_209850-t26_1-p1	RNA recognition motif-containing protein	TGME49_209850	168190	1	0.94			1	3908.95
TGME49_227850-t26_1-p1	peptidyl-prolyl cis-trans isomerase, cyclophilin-type domain-containing protein	TGME49_227850	66253	1	1.69									1	3898.45
TGME49_264780-t26_1-p1	UTP-glucose-1-phosphate uridylyltransferase subfamily protein	TGME49_264780	97011	1	2							1	3859.38
TGME49_226350-t26_1-p1	hypothetical protein	TGME49_226350	168114	3	3.06			1	2301.31	2	1557.83
TGME49_272720-t26_1-p1	methyltransferase domain-containing protein	TGME49_272720	138291	1	0.94					1	3849.4
TGME49_230140-t26_1-p1	vacuolar sorting protein 9 (vps9) domain-containing protein	TGME49_230140	140048	1	0.75					1	3782.78
TGME49_233160-t26_1-p1	hypothetical protein	TGME49_233160	198676	2	1.49	2	3779.05
TGME49_226890-t26_1-p1	hypothetical protein	TGME49_226890	223885	3	1.6	3	3707.35
TGME49_289650-t26_1-p1	PEP-carboxykinase I	TGME49_289650	75343	1	2.22					1	3689.83
TGME49_273580-t26_1-p1	hypothetical protein	TGME49_273580	155196	2	1.34			2	1918.1	1	1768.04
TGME49_300330-t26_1-p1	hypothetical protein	TGME49_300330	137693	1	1.11					1	3569.37
TGME49_230860-t26_1-p1	hypothetical protein	TGME49_230860	96993	2	3.88							1	3563.92
TGME49_234490-t26_1-p1	kelch repeat-containing protein	TGME49_234490	164472	1	0.8			1	3542.87
TGME49_203750-t26_1-p1	hypothetical protein	TGME49_203750	149766	1	0.87					1	3530.87
TGME49_315770-t26_1-p1	cytochrome p450 superfamily protein	TGME49_315770	62585	1	2.17											1	3507.9
TGME49_289080-t26_1-p1	HEAT repeat-containing protein	TGME49_289080	129380	1	0.92					1	3485.58
TGME49_321650-t26_1-p1	hypothetical protein	TGME49_321650	153573	1	1.45					1	3479.03
TGME49_293000-t26_1-p1	3'5'-cyclic nucleotide phosphodiesterase domain-containing protein	TGME49_293000	243909	4	2.23	4	3447.17
TGME49_308810-t26_1-p1	rhoptry neck protein RON9	TGME49_308810	158583	1	0.8			1	3446.33
TGME49_293470-t26_1-p1	hypothetical protein	TGME49_293470	43492	1	3.25											1	3439.97
TGME49_267580-t26_1-p1	cyclin2 related protein	TGME49_267580	94843	1	1.97							1	3426.68
TGME49_251730-t26_1-p1	hypothetical protein	TGME49_251730	160364	1	0.75			1	3406.31
TGME49_254500-t26_1-p1	hypothetical protein	TGME49_254500	60687	2	5.12									1	3373.95
TGME49_241830-t26_1-p1	peptidyl-prolyl cis-trans isomerase	TGME49_241830	64463	1	2.26									1	3365.01
TGME49_267560-t26_1-p1	folate-binding protein YgfZ protein	TGME49_267560	154852	1	0.63					1	3356.64
TGME49_278440-t26_1-p1	SWI2/SNF2 Brahma-like putative	TGME49_278440	285454	2	0.82	2	2821.17	1	530.714
TGME49_313910-t26_1-p1	RNA recognition motif 2 protein	TGME49_313910	99537	1	2.33							1	3323.59
TGME49_285250-t26_1-p1	hypothetical protein	TGME49_285250	121221	1	0.78					1	2676.27			1	638.52
TGME49_223020-t26_1-p1	coproporphyrinogen III oxidase	TGME49_223020	41677	1	3.57													1	3313.67
TGME49_305800-t26_1-p1	6-pyruvoyl tetrahydrobiopterin synthase	TGME49_305800	49002	1	3.79											1	3313.28
TGME49_215380-t26_1-p1	hypothetical protein	TGME49_215380	85293	1	2.01							1	3312.56
TGME49_314480-t26_1-p1	hypothetical protein	TGME49_314480	92277	1	1.33							1	3295.5
TGME49_256060-t26_1-p1	nucleosome assembly protein (nap) protein	TGME49_256060	89465	1	2.09					1	3276.64
TGME49_225860-t26_1-p1	hypothetical protein	TGME49_225860	111619	1	1.42					1	3272.69
TGME49_240220-t26_1-p1	hypothetical protein	TGME49_240220	166358	1	1.12			1	1257.48	1	1979.54
TGME49_244390-t26_1-p1	coatomer epsilon subunit protein	TGME49_244390	33932	1	4.21													1	3219.28
TGME49_233120-t26_1-p1	AP2 domain transcription factor AP2VIII-2	TGME49_233120	256684	3	1.76	3	3144.15
TGME49_304970-t26_1-p1	cell-cycle-associated protein kinase CDK, putative	TGME49_304970	151552	1	0.51			1	3143.65
TGME49_232440-t26_1-p1	Brf1p family coiled coil protein	TGME49_232440	54044	1	3.85											1	3112.54
TGME49_221610-t26_1-p1	ubiquitin carboxyl-terminal hydrolase	TGME49_221610	87237	1	1.76					1	2117.83	1	991.001
TGME49_225360-t26_1-p1	hypothetical protein	TGME49_225360	82311	1	1.72							1	3068.44
TGME49_243280-t26_1-p1	Met-10+ like-protein	TGME49_243280	98908	1	1.34									1	3056.27
TGME49_262760-t26_1-p1	poly(ADP-ribose) glycohydrolase	TGME49_262760	117417	1	1.12					1	3047.91
TGME49_285180-t26_1-p1	hypothetical protein	TGME49_285180	69785	1	1.42															1	2999.35
TGME49_304990-t26_1-p1	guanylate-binding protein, N-terminal domain-containing protein	TGME49_304990	142697	1	0.55					1	2950.75
TGME49_248130-t26_1-p1	hypothetical protein	TGME49_248130	93453	1	1.39									1	2930.52
TGME49_248400-t26_1-p1	glyoxalase I, putative	TGME49_248400	38472	1	3.27													1	2917.04
TGME49_232680-t26_1-p1	hypothetical protein	TGME49_232680	180410	2	1.5			2	2902.57
TGME49_231170-t26_1-p1	RecF/RecN/SMC N terminal domain-containing protein	TGME49_231170	170445	2	1.77			2	2891.12
TGME49_227450-t26_1-p1	hydrolase, NUDIX family protein	TGME49_227450	216621	3	1.7	1	1073.68	1	1380.59	1	379.969
TGME49_319930-t26_1-p1	hypothetical protein	TGME49_319930	121345	1	1.15					1	2791.95
TGME49_244000-t26_1-p1	DEAD/DEAH box helicase domain-containing protein	TGME49_244000	110544	1	1.31					1	2749.9
TGME49_239930-t26_1-p1	beta-catenin family protein 1, putative	TGME49_239930	73345	1	2.52									1	2732.89
TGME49_240090-t26_1-p1	rhoptry kinase family protein ROP34, putative	TGME49_240090	61668	1	1.81											1	2710.47
TGME49_258640-t26_1-p1	adenylate kinase superfamily protein	TGME49_258640	61126	1	2.11													1	2647.06
TGME49_253750-t26_1-p1	PLU-1 family protein	TGME49_253750	856703	7	1.24	5	2010.75	2	634.001
TGME49_248290-t26_1-p1	WD domain, G-beta repeat-containing protein	TGME49_248290	358181	4	2.09	3	2625.89
TGME49_211870-t26_1-p1	LSU ribosomal protein L18P, putative	TGME49_211870	56969	1	2.52															1	2619.93
TGME49_224260-t26_1-p1	PHD-finger domain-containing protein	TGME49_224260	602434	3	0.8	3	2512.84	1	97.1486
TGME49_239740-t26_1-p1	dense granule protein GRA14	TGME49_239740	44711	1	2.7													1	2603.32
TGME49_245730-t26_1-p1	phosphatidylinositol-4-phosphate 5-Kinase	TGME49_245730	232512	1	0.47			1	2598.37
TGME49_264440-t26_1-p1	signal recognition particle receptor beta subunit protein	TGME49_264440	37369	1	2.31													1	2563.66
TGME49_222300-t26_1-p1	hypothetical protein	TGME49_222300	159728	1	0.68			1	2443.02
TGME49_286720-t26_1-p1	heat shock protein HSP28	TGME49_286720	31094	1	5.43													1	2440.6
TGME49_314750-t26_1-p1	hypothetical protein	TGME49_314750	49995	1	3.62											1	2408.2
TGME49_313440-t26_1-p1	hypothetical protein	TGME49_313440	35503	1	2.27													1	2404.74
TGME49_220910-t26_1-p1	HEAT repeat-containing protein	TGME49_220910	190437	3	2.04			3	2371.58
TGME49_226800-t26_1-p1	eukaryotic glutathione synthase, atp binding domain-containing protein	TGME49_226800	161394	1	0.95			1	2317.77
TGME49_299810-t26_1-p1	cysteine-tRNA synthetase (CysRS)	TGME49_299810	101371	1	1.45									1	2304.09
TGME49_255420-t26_1-p1	hypothetical protein	TGME49_255420	30213	1	5.4													1	2237.9
TGME49_288680-t26_1-p1	endonuclease IV APN	TGME49_288680	72252	1	2.55											1	2174.34
TGME49_226660-t26_1-p1	hypothetical protein	TGME49_226660	389806	3	0.7	2	1698.18	1	474.036
TGME49_227820-t26_1-p1	hypothetical protein	TGME49_227820	214277	1	0.45	1	1189.02	1	979.277
TGME49_280800-t26_1-p1	SWI2/SNF2 SRCAP/Ino80	TGME49_280800	316987	2	0.79	2	2139.98
TGME49_264190-t26_1-p1	hypothetical protein	TGME49_264190	197249	3	2.09	3	2110.42
TGME49_285750-t26_1-p1	6,7-dihydropteridine reductase	TGME49_285750	47429	1	3.18													1	2104.53
TGME49_236560-t26_1-p1	hypothetical protein	TGME49_236560	259589	1	0.48							1	2075.55
TGME49_312050-t26_1-p1	small GTPase Rab2, putative	TGME49_312050	24209	1	6.07															1	2074.11
TGME49_257960-t26_1-p1	GDP-D-mannose pyrophosphorylase	TGME49_257960	47704	1	4.1													1	2061.26
TGME49_205540-t26_1-p1	DEAD/DEAH box helicase domain-containing protein	TGME49_205540	116586	1	1.22					1	2016.55
TGME49_226560-t26_1-p1	zinc finger (CCCH type) motif-containing protein	TGME49_226560	45182	2	5.74											1	2014.23
TGME49_258990-t26_1-p1	bromodomain-containing protein	TGME49_258990	194118	1	0.38	1	1990.81
TGME49_222230-t26_1-p1	hypothetical protein	TGME49_222230	265302	3	1.6	3	1933.13
TGME49_252220-t26_1-p1	tetratricopeptide repeat domain containing protein	TGME49_252220	63343	1	1.95									1	1900.34
[truncated: 403 more rows]

## Sheet: METTL3-data
accession	protein name	gene name	molecular weight	identified peptides	coverage	METTL3-Band1		METTL3-Band2		METTL3-Band3		METTL3-Band4		METTL3-Band5		METTL3-Band6		METTL3-Band7
[truncated: 2,560 more rows]

[truncated: 2 more sheets: METTL14-data, WTAP-data]
