# Supplementary material for: A plant-like mechanism coupling m6A reading to polyadenylation safeguards transcriptome integrity and developmental gene partitioning in Toxoplasma
Source: eLife. 2021 Jul 15;10:e68312. doi: 10.7554/eLife.68312 (PMC8313237; doi:10.7554/eLife.68312)
Supplement: Supplementary file 3. — RNA-Seq report, Raw counts of T. gondii transcripts generated by feature Counts (Subread), Normalized T. gondii transcripts (TPM), Differential expression analysis (iDEP.92), data used in volcano plot (48 hr vs UT). [file elife-68312-supp3.xlsx]

## Sheet: RNA-Seq report
Sample ID	Barcode Sequence	# Reads	Yield (Mbases)	Mean Quality Score	% Bases >= 30
UT-1	GAACGAAG+GAATCACC	23032095	6956	34.84	88.44
UT-2	CGAATTGC+GTAAGGTG	19479766	5883	35.61	92.18
7h-1	GGAAGAGA+CGAGAGAA	38511528	11630	34.8	88.25
7h-2	TCGGATTC+CGCAACTA	53939296	16290	35.29	90.52
24h-1	TACCTGCA+GGACATCA	52609291	15888	35.4	91.2
24h-2	GAGAGTAC+TGGAAGCA	32431575	9794	34.67	87.41
48h-1	TCTACGCA+CAATAGCC	31982999	9659	34.54	86.82
48h-2	GCAATTCC+CTCGAACA	52751734	15931	35.14	89.76

## Sheet: CPSF30-mAID_subread_counts
Geneid	UT-1	UT-2	7h-1	7h-2	24h-1	24h-2	48h-1	48h-2
TGME49_238000	195	180	95	208	339	217	892	1221
TGME49_238010	7228	6131	3578	5949	12343	7540	19666	33208
TGME49_238020	161	159	36	115	126	104	516	613
TGME49_238030	50	33	7	35	36	24	131	194
TGME49_238040	303	224	99	258	351	238	1217	1438
TGME49_238050	1309	1270	555	952	1357	970	4777	6605
TGME49_238060	3	1	6	8	32	32	222	264
TGME49_238070	201	176	95	158	260	171	707	973
TGME49_238073	194	132	97	154	163	119	425	509
TGME49_238077	12	7	4	10	7	11	62	56
TGME49_238080	150	182	62	124	246	152	505	741
TGME49_238100	658	534	313	522	886	611	1698	2652
TGME49_238110	557	430	327	547	741	555	1451	2103
TGME49_238130	400	446	191	378	639	439	2446	3202
TGME49_238140	1062	972	371	599	896	649	2482	3258
TGME49_238150	1361	986	449	747	2498	1636	5888	8792
TGME49_238160	2	0	4	6	71	33	131	221
TGME49_238165	2	0	0	0	2	0	7	12
TGME49_238170	400	297	89	199	350	282	1049	1527
TGME49_238180	783	738	377	632	1093	777	2238	3515
TGME49_238190	320	315	139	297	372	285	1108	1546
TGME49_238200	3	5	14	13	22	14	94	108
TGME49_238210	17	18	15	21	85	40	526	908
TGME49_238220	11	14	21	14	46	31	166	213
TGME49_238230	259	246	150	292	383	265	998	1428
TGME49_238240	1160	1043	455	667	1345	774	1968	3490
TGME49_238250	6977	7118	2612	4629	10144	6208	17344	30452
TGME49_238260	70	50	14	46	62	45	328	334
TGME49_238270	36	20	34	70	47	48	236	298
TGME49_238380	2201	2025	453	937	2222	1528	5042	7393
TGME49_238390	1173	1275	340	564	811	632	4049	4742
TGME49_238400	736	790	226	382	527	423	1623	2188
TGME49_238410	338	379	138	207	608	438	953	1619
TGME49_238420	344	368	108	148	364	245	912	1183
TGME49_238440	16	15	29	42	113	46	278	390
TGME49_238450	0	0	1	0	1	4	7	19
TGME49_238460	4	2	0	1	3	1	2	7
TGME49_238470	0	1	0	1	0	8	1	4
TGME49_238480	0	0	1	0	3	1	5	11
TGME49_238490	54	34	24	38	101	41	78	187
TGME49_238500	0	0	0	0	0	0	1	1
TGME49_238505	3	4	0	3	4	1	16	17
TGME49_238510	249	273	108	176	281	181	622	854
TGME49_238520	0	0	0	0	0	0	0	0
TGME49_238530	0	0	3	1	14	4	6	13
TGME49_238850	0	1	0	3	3	0	2	3
TGME49_238860	0	0	0	0	1	0	1	0
TGME49_238870	262	241	118	181	258	216	774	1046
TGME49_238880	369	410	211	350	448	267	611	1030
TGME49_238895	805	669	281	457	1085	708	2297	3603
TGME49_238915	1	2	4	10	22	12	109	113
TGME49_238930	44	60	24	31	81	46	187	293
TGME49_238940	83	77	27	60	94	61	201	295
TGME49_238950	2237	2146	727	1363	1732	1351	4846	7272
TGME49_238960	19	10	2	5	43	20	48	116
TGME49_238970	5	9	3	3	18	16	66	109
TGME49_238980	3	1	2	5	3	3	74	52
TGME49_238995	294	277	109	175	264	235	730	1049
TGME49_239010	990	672	283	505	841	516	2207	2944
TGME49_239020	1739	1427	604	1029	2323	1632	6124	8844
TGME49_239030	0	0	0	0	0	1	5	4
TGME49_239040	1	1	0	1	4	2	7	8
TGME49_239050	427	503	120	264	383	247	1355	1906
TGME49_239070	183	194	118	210	325	254	918	1247
TGME49_239080	82	142	34	90	114	77	334	531
TGME49_239083	21	20	13	15	45	19	103	126
TGME49_239087	260	193	92	145	296	191	766	1119
TGME49_239090	214	219	61	142	380	268	1181	1708
TGME49_239100	13938	12281	6236	10774	21687	14313	38588	65962
TGME49_239110	0	0	10	30	10	13	30	42
TGME49_239120	2	1	42	64	39	23	90	148
TGME49_239130	138	181	60	128	175	117	501	748
TGME49_239250	1758	1841	644	1383	1838	1230	3600	5850
TGME49_239260	56	54	17	39	104	61	322	470
TGME49_239270	1892	1579	769	1454	2130	1663	5557	7657
TGME49_239290	167	245	69	134	192	143	545	715
TGME49_239300	350	266	78	130	367	271	1220	1432
TGME49_239310	289	231	124	231	501	282	983	1424
TGME49_239320	126	89	46	90	113	97	267	385
TGME49_239330	10016	10823	3862	6661	13686	8720	21626	38601
TGME49_239340	292	381	118	173	289	203	913	1331
TGME49_239350	131	140	60	116	153	91	446	553
TGME49_239365	2	3	3	7	16	10	84	82
TGME49_239885	291	344	133	207	317	196	1321	1544
TGME49_239400	1061	939	330	557	1261	764	3631	4938
TGME49_239410	1518	1919	532	1174	1366	973	5487	6793
TGME49_239420	3465	3200	958	1789	2501	2068	13165	15830
TGME49_239430	0	0	4	15	14	27	117	127
TGME49_239440	762	842	342	601	941	721	3286	4424
TGME49_239450	0	0	0	0	1	0	3	1
TGME49_239475	31	39	29	49	104	58	360	502
TGME49_239480	386	331	121	283	308	249	907	1350
TGME49_239490	1362	1127	639	1165	1996	1257	4649	7047
TGME49_239500	1247	1201	717	1143	1628	1153	3324	5350
TGME49_239510	5	8	4	2	39	25	67	127
TGME49_239520	0	2	1	4	42	22	42	61
TGME49_239530	441	491	161	252	496	310	769	1219
TGME49_239540	608	535	154	308	609	442	2199	2420
TGME49_239550	4	2	1	1	4	0	30	40
TGME49_239560	133	124	54	65	219	163	586	720
TGME49_239570	0	0	0	0	3	0	2	11
TGME49_239580	1	0	2	0	14	8	14	24
TGME49_239590	347	323	190	316	414	319	878	1292
TGME49_239600	171	147	54	86	460	285	1126	1799
TGME49_239610	198	201	109	213	293	208	762	1138
TGME49_239620	406	357	67	132	303	195	1451	1561
TGME49_239630	284	288	90	188	397	297	1109	1604
TGME49_239640	1	1	4	11	15	11	53	83
TGME49_239650	0	1	0	7	1	0	21	27
TGME49_239660	1	1	5	2	2	4	11	33
TGME49_239670	0	0	9	7	10	9	66	52
TGME49_239680	331	339	123	249	406	262	1255	1572
TGME49_239690	141	148	71	110	169	135	507	604
TGME49_239700	526	593	106	233	434	346	1657	2079
TGME49_239710	275	266	174	258	486	291	877	1482
TGME49_239720	267	224	120	198	350	225	1046	1339
TGME49_239730	7	7	15	36	60	58	558	667
TGME49_239740	5848	5099	1433	2657	6632	4597	19826	27744
TGME49_239748	240	174	79	134	360	237	1636	2166
TGME49_239752	1384	1354	474	951	1758	1205	3577	5385
TGME49_239755	0	0	3	3	12	17	69	88
TGME49_239760	5124	4160	1914	3295	7987	4898	16283	26264
TGME49_239770	925	731	235	385	1322	849	2506	3769
TGME49_239780	608	418	105	213	564	327	1690	2222
TGME49_239790	784	774	365	543	899	622	2070	3061
TGME49_239795	771	622	248	394	1196	877	3570	4638
TGME49_239800	890	669	279	473	1583	1153	3607	5285
TGME49_239810	361	334	180	262	398	329	1460	2055
TGME49_239820	4200	3553	1433	2436	4171	3127	10335	15758
TGME49_239830	1212	1019	343	637	1422	1121	3183	4713
TGME49_239855	21	26	16	30	89	64	312	425
TGME49_239870	493	452	170	317	556	313	1665	2133
TGME49_239880	35	16	5	20	54	29	153	216
TGME49_239890	1417	1213	458	803	1961	1363	4742	7149
TGME49_239910	2521	2307	659	1180	2590	1913	6673	9322
TGME49_239930	256	214	91	153	265	138	857	1053
TGME49_240050	450	501	167	331	520	403	1699	2311
TGME49_240060	3696	2887	724	1277	3158	2069	14170	17988
TGME49_240070	555	546	269	453	607	489	1762	2412
TGME49_240080	447	399	107	169	379	283	1094	1502
TGME49_240090	3491	3422	824	1603	2973	1911	9816	13654
TGME49_240200	7	11	8	10	68	36	160	222
TGME49_240210	217	232	73	166	231	137	800	1085
TGME49_240220	344	374	137	255	341	201	1360	1759
TGME49_240230	1	0	9	4	9	14	35	29
TGME49_240240	93	71	21	47	69	39	156	251
TGME49_240243	73	75	29	58	81	61	244	314
TGME49_240247	28	29	15	19	55	32	165	217
TGME49_240250	1098	1143	319	602	1421	912	3462	5138
TGME49_240255	101	88	71	93	141	87	509	592
TGME49_240260	0	0	0	0	0	0	7	7
TGME49_240270	65	63	30	45	58	46	165	258
TGME49_240280	1001	1018	445	847	1113	822	2594	4175
TGME49_240285	0	1	1	5	14	9	69	90
TGME49_240290	4	3	0	4	9	11	42	78
TGME49_240295	4	0	3	1	10	0	13	43
TGME49_240300	219	238	48	109	223	160	680	926
TGME49_240310	12	2	6	4	16	8	42	71
TGME49_240325	1	0	2	2	4	5	7	14
TGME49_240330	0	0	0	3	0	5	5	9
TGME49_240340	1	0	0	2	6	14	16	14
TGME49_240350	0	0	0	0	3	0	1	6
TGME49_240360	0	0	0	0	1	0	2	9
TGME49_240365	1	1	0	0	1	4	5	11
TGME49_240370	15	8	2	3	16	5	43	63
TGME49_240380	1355	1243	446	719	1347	882	3067	4496
TGME49_240390	4	6	5	6	32	17	72	124
TGME49_240400	59	71	23	45	107	59	147	235
TGME49_240410	359	338	146	291	287	172	616	797
TGME49_240430	150	129	71	137	160	174	412	659
TGME49_240440	248	185	99	139	266	219	566	1014
TGME49_240450	219	188	79	136	221	206	375	591
TGME49_240460	90	90	24	46	128	74	279	470
TGME49_240470	14	14	15	23	89	59	344	472
TGME49_240480	231	110	61	157	270	216	532	773
TGME49_240490	161	173	46	100	211	128	486	686
TGME49_240500	155	98	115	194	329	236	612	933
TGME49_240510	242	221	138	309	318	273	1128	1475
TGME49_240520	443	312	139	268	367	311	1159	1749
TGME49_240525	3	1	6	16	16	12	76	99
TGME49_240530	0	1	1	2	2	13	32	36
TGME49_240540	580	500	228	400	688	549	2411	3410
TGME49_240550	0	0	0	0	0	0	0	0
TGME49_240560	609	508	172	257	1156	759	1937	3067
TGME49_240570	690	542	135	263	946	626	2495	3195
TGME49_240575	0	0	1	0	6	7	26	31
TGME49_240580	13	16	27	22	34	42	145	243
TGME49_240590	936	732	489	772	1544	1050	3257	5015
TGME49_240600	1506	1211	666	1180	1808	1370	3879	6048
TGME49_240610	1	5	7	9	22	14	93	133
TGME49_240620	3	1	2	5	26	26	79	108
TGME49_240630	1110	901	409	686	1501	1154	3648	6063
TGME49_240640	2346	2126	851	1703	2466	1781	7741	10048
TGME49_240650	1210	1175	468	932	1110	822	3200	4174
TGME49_240660	185	173	113	155	363	183	690	1025
TGME49_240670	109	94	49	71	151	114	473	629
TGME49_240680	0	0	1	2	1	3	1	13
TGME49_240690	1591	1478	724	1348	2695	1776	5804	8578
TGME49_240700	360	377	145	309	517	318	1516	1907
TGME49_240710	459	491	154	283	497	357	1621	2291
TGME49_240730	251	217	89	147	289	265	764	1065
TGME49_240740	301	337	129	197	296	225	911	1232
TGME49_240755	166	165	71	107	174	94	258	431
TGME49_240770	208	196	99	172	274	168	602	915
TGME49_240780	157	153	55	110	281	148	837	1028
TGME49_240790	1	2	4	3	18	1	22	33
TGME49_240800	1023	1144	477	872	1379	1075	2593	4251
TGME49_240810	1169	1009	486	990	1282	880	2730	4223
TGME49_240820	63	33	12	31	31	32	86	126
TGME49_240830	101	105	34	67	76	86	269	363
TGME49_240840	279	184	112	228	284	195	557	832
TGME49_240850	152	118	54	119	170	100	606	861
TGME49_240860	416	386	125	220	553	329	1205	1690
TGME49_240870	614	584	288	512	766	599	2262	3046
TGME49_240880	334	330	181	340	643	427	2647	3478
TGME49_240890	731	750	261	570	743	567	2334	3182
TGME49_240900	298	321	104	178	459	258	1783	2158
TGME49_240910	322	369	143	233	504	361	1454	2033
TGME49_240920	0	0	0	0	0	0	0	0
TGME49_240930	8	8	15	29	67	40	342	539
TGME49_240940	0	3	0	3	9	0	31	27
TGME49_240950	88	124	34	52	129	133	447	634
TGME49_240960	812	774	179	387	765	616	3420	4729
TGME49_240970	209	148	90	135	218	197	930	1056
TGME49_240980	722	737	246	441	832	553	2634	3575
TGME49_240990	86	63	28	59	144	72	433	450
TGME49_241010	637	625	197	286	780	531	2507	3267
TGME49_241000	0	0	0	0	0	0	0	0
TGME49_241130	100	103	52	99	202	140	511	797
TGME49_241140	172	213	63	128	415	264	1037	1363
TGME49_241150	385	330	208	283	404	273	1255	1567
TGME49_241155	275	238	104	181	219	196	981	1276
TGME49_241160	445	331	158	288	440	294	1462	1858
TGME49_241165	40	32	62	77	75	63	398	471
TGME49_241170	568	542	120	280	442	300	1515	1907
TGME49_241175	113	119	48	91	145	95	434	501
TGME49_241180	916	870	260	459	923	689	3090	4278
TGME49_241240	7345	6418	1461	2688	5852	4115	21068	27097
TGME49_241300	1240	1031	251	527	854	673	2844	3860
TGME49_241305	669	600	131	332	516	421	1665	2390
TGME49_241310	295	259	65	102	302	198	678	1030
TGME49_241610	841	704	149	360	675	507	2289	3258
TGME49_241710	111	102	41	60	162	83	308	466
TGME49_241820	2709	2457	964	1655	2406	1807	6969	9775
TGME49_241830	220	235	70	137	181	139	663	998
TGME49_241840	478	420	164	320	540	431	2335	3130
TGME49_241850	491	589	215	355	460	319	1528	1999
TGME49_241860	149	126	59	95	169	149	536	706
TGME49_241870	114	144	57	90	144	112	594	810
TGME49_241880	811	884	374	634	1020	788	2497	3790
TGME49_241890	230	215	107	181	271	207	633	982
TGME49_242000	2436	2950	782	1523	2963	1843	7050	10963
TGME49_242010	304	338	134	247	289	230	1097	1496
TGME49_242020	269	234	94	202	245	159	461	744
TGME49_242030	245	245	79	191	250	186	713	985
TGME49_242040	2	1	2	2	1	0	11	9
TGME49_242055	148	244	59	118	120	103	400	526
TGME49_242070	3623	3705	1323	2529	4775	3082	11622	16406
TGME49_242080	373	304	142	199	492	312	1556	2039
TGME49_242090	5728	4877	1670	3075	4198	3319	18528	24139
TGME49_242100	7	9	15	13	95	30	201	266
TGME49_242110	5	4	2	11	65	29	124	200
TGME49_242118	104	73	9	24	101	64	209	422
TGME49_242230	3	3	0	0	2	1	8	13
TGME49_242240	240	216	101	156	555	395	1248	2088
TGME49_242250	6	7	1	7	18	11	63	60
TGME49_242260	389	424	108	225	317	205	794	1328
TGME49_242270	319	310	107	190	336	279	1505	1889
TGME49_242290	1527	1129	752	1195	1724	1263	3847	5423
TGME49_242300	0	0	0	2	7	1	33	41
TGME49_242310	0	2	20	38	16	15	66	82
TGME49_242320	584	446	529	1070	1018	866	2773	4046
TGME49_242330	10501	9384	3765	6897	13205	9989	27978	44061
TGME49_242340	5359	5638	2681	4517	9887	6428	15460	26928
TGME49_242350	1	0	11	7	14	10	37	43
TGME49_242360	3	0	8	8	11	8	19	39
TGME49_242370	0	2	2	0	3	6	18	13
TGME49_242380	904	663	316	559	899	653	2646	3477
TGME49_242390	1	0	1	10	9	7	19	16
TGME49_242400	1	0	0	0	0	0	0	3
TGME49_242415	293	293	125	223	342	177	770	938
TGME49_242435	178	171	58	128	173	140	681	877
TGME49_242460	249	205	115	178	284	196	702	1111
TGME49_242570	1127	1060	412	719	1691	1274	4127	5870
TGME49_242580	301	231	72	142	329	196	1404	1943
TGME49_242590	26	16	9	12	28	13	203	195
TGME49_242600	0	0	0	1	1	0	7	15
TGME49_242610	157	78	67	84	153	127	345	527
TGME49_242625	275	336	175	272	354	247	733	1087
TGME49_242640	536	542	184	295	470	338	2269	2423
TGME49_242650	60	68	22	35	72	45	274	385
TGME49_242660	961	834	438	658	1322	902	3247	4582
TGME49_242670	145	109	37	56	188	130	423	662
TGME49_242680	529	500	308	443	783	606	1505	2445
TGME49_242700	540	640	161	279	664	416	2157	2603
TGME49_242710	0	0	0	0	0	0	0	0
TGME49_242720	378	323	130	292	414	375	2246	2660
TGME49_242730	427	465	169	321	419	281	1814	2670
TGME49_242740	4	3	18	34	29	23	197	229
TGME49_242750	3	3	0	4	84	51	94	176
TGME49_242760	35	32	21	8	105	72	263	406
TGME49_242770	106	123	28	43	127	129	591	746
TGME49_242780	663	774	200	412	532	322	1936	2442
TGME49_242790	654	663	165	318	784	469	1591	2464
TGME49_242800	789	691	365	685	967	714	2108	3223
TGME49_242810	167	191	84	161	217	159	641	888
TGME49_242820	1734	1547	528	911	2316	1592	5035	7630
TGME49_242830	442	419	217	412	520	393	1664	2209
TGME49_242840	937	613	336	625	1493	1100	3123	4667
TGME49_242845	287	306	147	259	613	329	787	1544
TGME49_242850	483	454	140	259	481	338	1372	1845
TGME49_242860	351	313	110	208	365	267	833	1274
TGME49_242870	232	182	64	121	251	140	527	811
TGME49_242880	172	156	74	143	190	200	652	806
TGME49_242890	356	336	144	262	326	302	1038	1415
TGME49_242900	0	2	2	1	7	8	29	53
TGME49_243100	0	0	0	1	0	0	0	0
TGME49_243110	0	0	0	1	0	0	0	2
TGME49_243120	0	0	0	0	0	4	1	3
TGME49_243130	0	0	0	2	0	0	0	1
TGME49_243140	0	0	0	0	1	0	0	2
TGME49_243150	0	0	0	0	2	0	0	0
TGME49_243160	0	0	0	0	0	0	0	0
TGME49_243170	0	0	3	1	0	0	0	1
TGME49_243180	0	0	0	0	0	0	0	0
TGME49_243190	4	2	6	6	30	21	33	61
TGME49_243200	3488	2918	1008	2066	3982	3253	9955	13800
TGME49_243210	940	971	341	627	1102	868	4119	5305
TGME49_243220	0	0	0	0	0	0	0	0
TGME49_243240	111	89	40	81	126	88	471	634
TGME49_243250	1426	1238	314	637	1322	967	3890	5029
TGME49_243265	189	179	48	126	160	117	472	641
TGME49_243280	325	334	101	206	302	272	834	1085
TGME49_243290	432	419	169	264	481	394	1284	1853
TGME49_243298	184	162	56	85	181	112	456	566
TGME49_243302	0	0	0	0	0	0	1	1
TGME49_243310	345	310	103	241	406	301	1357	1799
TGME49_243320	0	0	0	0	0	0	0	0
TGME49_243330	1	3	1	5	9	3	64	53
TGME49_243340	181	171	74	128	166	138	511	760
TGME49_243350	123	109	45	86	141	93	563	760
TGME49_243355	1	0	2	4	5	5	20	32
TGME49_243360	0	1	1	3	9	9	23	23
TGME49_243370	1	1	3	11	7	6	20	36
TGME49_243378	1	2	3	2	4	6	19	35
TGME49_243382	8	11	5	9	105	44	183	299
TGME49_243390	207	172	109	167	226	146	622	816
TGME49_243400	199	193	65	149	205	127	1027	1147
TGME49_243410	251	291	119	206	266	202	903	1174
TGME49_243420	19	13	18	24	32	22	123	147
TGME49_243430	1236	983	281	600	900	755	5547	6556
TGME49_243440	551	569	252	492	624	540	2464	3132
TGME49_243450	445	387	144	218	420	308	1222	1578
TGME49_243460	6391	7301	1943	3993	5588	3910	19992	27014
TGME49_243465	217	181	64	88	135	93	802	923
TGME49_243470	15	9	21	56	99	53	421	392
TGME49_243480	204	171	72	142	186	153	479	656
TGME49_243490	208	166	98	171	218	168	872	1081
TGME49_243500	0	0	0	1	0	7	15	20
TGME49_243510	135	119	72	140	207	113	429	617
TGME49_243520	2	6	2	4	7	2	10	30
TGME49_243530	91	118	52	79	135	86	392	485
TGME49_243540	422	410	203	332	493	305	1400	1981
TGME49_243545	1583	1294	414	983	2329	1708	6893	9570
TGME49_243550	0	0	0	0	2	0	6	10
TGME49_243560	1	0	11	9	17	12	49	70
TGME49_243570	6295	5512	2797	4813	9547	5733	15002	26126
TGME49_243580	857	676	309	527	1102	748	2364	3772
TGME49_243590	248	177	90	201	218	190	803	961
TGME49_243600	790	790	263	458	1190	859	3635	5172
TGME49_243610	262	233	93	168	290	223	1125	1378
TGME49_243615	118	152	39	82	166	132	530	664
TGME49_243620	470	418	209	318	523	435	1572	2052
TGME49_243635	110	138	77	114	239	174	757	1222
TGME49_243655	0	3	2	3	8	5	65	61
TGME49_243670	0	0	0	0	2	0	0	0
TGME49_243680	53	57	16	42	134	63	306	496
TGME49_243690	1935	1705	520	885	3187	2352	7336	10918
TGME49_243700	18	11	4	10	16	9	71	118
TGME49_243710	1643	1443	906	1514	1658	1217	4331	6408
TGME49_243720	4	6	19	42	56	53	277	326
TGME49_243730	9292	8096	3210	5462	13080	9537	31669	43868
TGME49_243740	25	29	11	32	53	50	179	268
TGME49_243750	228	171	66	108	202	159	685	837
TGME49_243760	178	138	102	149	199	163	919	1039
TGME49_243770	4	0	0	1	0	0	2	3
TGME49_243780	275	305	116	199	402	251	1281	1663
TGME49_243790	542	485	183	330	659	505	1894	2411
TGME49_243800	1558	1458	438	938	1494	1234	4512	6358
TGME49_243900	1	3	0	1	3	0	5	11
TGME49_243910	403	293	143	236	577	347	1183	1679
TGME49_243920	1195	1137	649	1164	1105	919	2898	4079
TGME49_243930	3056	2578	614	1219	2808	1956	9442	12082
TGME49_243940	78	58	63	89	346	230	1238	2002
TGME49_243950	1669	1371	868	1508	2057	1537	5109	7517
TGME49_243960	976	1178	382	771	1071	794	4388	5748
TGME49_243970	138	109	46	82	102	94	492	624
TGME49_243980	153	156	69	112	175	108	456	730
TGME49_243990	250	239	89	180	195	146	872	1174
TGME49_244000	366	367	165	283	518	339	1519	2106
TGME49_244010	323	278	122	251	459	332	1114	1572
TGME49_244015	0	0	0	0	0	0	1	1
TGME49_244020	301	319	147	279	420	253	1159	1834
TGME49_244030	5	3	1	5	16	8	77	107
TGME49_244040	216	326	110	211	282	241	1211	1466
TGME49_244050	173	198	59	140	209	124	644	828
TGME49_244060	686	733	174	344	740	476	2908	3636
TGME49_244070	0	0	0	0	0	0	0	0
TGME49_244080	706	569	163	337	773	554	1669	2378
TGME49_244090	105	81	56	76	118	96	527	649
TGME49_244100	435	510	188	342	506	327	1172	1721
TGME49_244105	87	78	18	45	62	57	191	238
TGME49_244110	1717	1982	929	1497	2315	1677	4361	7325
TGME49_244120	356	448	113	229	405	236	1179	1697
TGME49_244130	373	451	59	164	354	256	1340	1676
TGME49_244140	88	96	34	80	99	59	285	379
TGME49_244150	289	240	105	163	330	209	672	981
TGME49_244160	134	219	54	138	239	167	626	764
TGME49_244165	124	100	38	49	189	90	418	636
TGME49_244170	153	120	41	92	192	183	727	1065
TGME49_244180	75	103	27	37	78	64	367	589
TGME49_244190	1683	2031	479	904	1906	1193	4806	6697
TGME49_244200	907	731	361	734	941	656	2512	3642
TGME49_244210	615	624	269	423	670	452	2475	3697
TGME49_244220	84	148	38	80	68	88	388	406
TGME49_244230	251	245	82	140	181	147	645	772
TGME49_244240	210	176	185	317	733	464	1360	2135
TGME49_244250	1553	1215	351	680	1573	1177	4096	5966
TGME49_244260	256	182	51	89	497	364	1196	1846
TGME49_244270	260	225	94	169	305	234	1335	1722
TGME49_244280	4928	4029	1104	1835	2730	2180	5948	8688
TGME49_244290	411	355	120	261	440	350	1192	1631
TGME49_244300	237	301	87	199	309	226	598	889
TGME49_244310	537	495	276	496	686	434	1788	2565
TGME49_244320	7769	6655	3594	6170	12932	8371	21892	37084
TGME49_244335	6	9	9	10	16	15	107	133
TGME49_244350	241	192	87	161	254	214	631	826
TGME49_244360	0	0	5	13	6	14	29	44
TGME49_244370	989	850	562	967	1286	963	3366	4862
TGME49_244380	1089	1191	447	914	1241	796	2806	4351
TGME49_244390	789	836	391	689	1062	735	2501	3508
TGME49_244400	173	113	38	67	143	92	309	552
TGME49_244406	7	7	13	14	30	12	110	130
TGME49_244408	43	51	17	20	51	21	138	195
TGME49_244412	138	134	51	142	180	132	713	904
TGME49_244420	188	151	80	129	180	136	564	904
TGME49_244430	198	165	45	124	158	131	682	875
TGME49_244440	1846	1657	799	1465	1538	1045	2999	4433
TGME49_244450	179	160	86	170	213	181	1478	1875
TGME49_244460	1261	1340	510	1097	969	770	3983	5140
TGME49_244470	1210	1137	364	682	1378	1034	4016	5018
TGME49_244480	13	24	2	8	27	17	119	101
TGME49_244490	51	49	12	30	82	53	182	251
TGME49_244500	1085	1167	338	649	1130	902	2717	4031
TGME49_244510	76	80	22	59	92	53	204	293
TGME49_244515	10	20	7	14	29	14	64	83
TGME49_244520	209	200	78	144	183	167	737	884
TGME49_244530	3212	2994	880	1478	2624	1903	8100	11844
TGME49_244540	608	564	185	290	645	536	2582	3488
TGME49_244550	176	182	85	136	198	139	475	655
TGME49_244560	9237	10457	3851	7163	8601	6071	21129	32885
TGME49_244570	183	221	69	130	186	137	476	626
TGME49_244580	184	183	88	149	207	162	650	938
TGME49_244590	14	4	9	16	43	27	129	189
TGME49_244600	351	352	125	225	353	219	1045	1329
TGME49_244610	317	294	128	255	399	240	1248	1604
TGME49_244620	4	1	10	14	26	18	154	191
TGME49_244630	142	126	55	137	296	205	904	1107
TGME49_244640	660	572	129	298	569	442	1524	2162
TGME49_244645	183	188	48	121	170	164	612	847
TGME49_244650	693	765	301	625	820	541	1901	3008
TGME49_244660	241	225	72	127	324	231	972	1276
TGME49_244670	749	621	282	467	685	506	1833	2533
TGME49_244680	255	278	92	182	287	233	921	1344
TGME49_244690	1633	1545	474	959	1367	1075	4542	6330
TGME49_244700	4547	4696	1197	2033	3346	2607	12101	16334
TGME49_244710	205	182	103	261	327	250	1396	1784
TGME49_244715	23	15	42	80	153	126	584	677
TGME49_244720	249	241	326	590	1092	805	3248	4190
TGME49_244726	7	14	10	16	41	19	69	113
TGME49_244728	37	34	18	36	71	53	211	278
TGME49_244732	22	44	38	54	91	66	300	415
TGME49_244840	204	252	117	167	304	169	648	1071
TGME49_244850	3	5	4	12	21	13	66	105
TGME49_244860	128	100	46	73	150	124	370	529
TGME49_244870	261	240	79	189	267	203	725	1075
TGME49_244880	523	533	258	469	671	471	1541	2168
TGME49_244890	0	0	0	0	1	0	0	1
TGME49_244900	0	0	0	0	0	0	1	1
TGME49_244910	591	539	233	375	574	401	1904	2423
TGME49_244920	43	33	15	21	19	25	77	130
TGME49_244930	7	9	2	11	18	13	20	49
TGME49_244940	90	100	51	44	100	78	256	314
TGME49_244950	1	1	3	5	10	23	33	51
TGME49_237700	3	1	0	8	5	1	12	27
TGME49_292600	59	35	15	15	70	35	154	175
TGME49_292610	50	45	14	23	46	41	147	234
TGME49_207350	1	2	2	6	6	4	55	89
TGME49_207360	0	1	0	0	0	0	7	13
TGME49_207365	0	0	0	0	0	0	0	0
TGME49_207370	1713	1621	586	1261	1604	1308	5768	7389
TGME49_207380	0	0	0	0	0	0	0	0
TGME49_207390	264	246	108	231	260	253	1186	1538
TGME49_207400	3334	2570	589	1206	3387	2413	15336	20387
TGME49_207403	10	1	0	5	19	12	124	113
TGME49_207407	1	0	0	0	2	4	16	22
TGME49_207410	3	3	15	35	27	43	181	246
TGME49_207420	460	332	226	360	606	385	1390	1794
TGME49_207430	595	529	204	398	545	412	2264	3107
TGME49_207440	9847	9556	4096	6708	12179	8440	20229	33018
TGME49_207450	555	536	203	371	624	450	1940	2774
TGME49_207460	559	501	196	350	747	510	1728	2500
TGME49_207470	25	31	25	45	156	118	465	635
TGME49_207480	224	261	108	263	607	362	1574	2331
TGME49_207590	263	230	54	99	255	204	809	1293
TGME49_207600	98	68	22	36	148	91	481	605
TGME49_207610	0	1	7	13	20	26	129	185
TGME49_207620	1419	1446	532	1048	1661	1291	3802	5578
TGME49_207630	178	175	40	110	172	116	446	710
TGME49_207640	1038	925	414	804	1152	745	1953	3429
TGME49_207650	1	4	2	4	20	11	30	52
TGME49_207665	104	102	50	56	311	240	789	1328
TGME49_207680	848	802	482	789	1221	755	2739	3693
TGME49_207690	421	367	156	309	420	305	938	1403
TGME49_207700	16	15	26	43	52	29	146	215
TGME49_207710	241	179	116	219	362	227	849	1285
TGME49_207720	340	303	153	274	390	246	846	1118
TGME49_207730	2	0	11	17	14	12	44	88
TGME49_207740	0	0	0	0	7	3	40	32
TGME49_207750	1718	1465	675	1302	1902	1380	6735	9144
TGME49_207760	772	805	327	669	914	633	1836	2885
TGME49_207770	1168	1101	527	900	1640	1237	2881	4737
TGME49_207780	9	5	24	61	137	95	198	258
TGME49_207790	5	4	21	36	81	69	177	273
TGME49_207800	182	156	100	152	213	151	528	860
TGME49_207810	0	0	0	0	0	0	0	0
TGME49_207820	1298	1164	548	1044	1296	934	3406	5142
TGME49_207830	314	285	121	221	474	376	1131	1603
TGME49_207840	6928	5845	3708	6211	10936	7502	17291	31331
TGME49_207865	13	13	9	13	38	32	167	245
TGME49_207875	16	11	3	9	28	25	103	183
TGME49_207880	156	141	68	127	340	268	2195	2695
TGME49_207900	391	397	152	265	475	300	1526	1947
TGME49_207910	327	326	85	179	252	203	1359	1711
TGME49_207920	221	209	83	117	282	160	935	1278
TGME49_207930	536	460	172	258	654	432	2266	3078
TGME49_207940	214	184	112	185	251	230	972	1222
TGME49_207950	303	245	151	208	455	344	1263	1890
TGME49_207955	5	9	1	6	7	3	56	52
TGME49_207960	361	364	153	239	418	337	1292	1848
TGME49_207965	7	3	0	2	25	16	107	132
TGME49_207970	23	49	23	43	95	59	258	361
TGME49_207980	89	85	28	51	131	74	289	373
TGME49_207990	460	498	245	468	576	418	1075	1896
TGME49_208010	358	348	140	241	486	343	1334	1784
TGME49_208020	34	36	35	61	148	108	1611	1718
TGME49_208030	9738	8019	3683	6641	10546	7621	40500	53630
TGME49_208040	225	234	100	201	227	245	859	1070
TGME49_208050	290	373	163	299	356	302	1352	1666
TGME49_208070	478	497	166	290	339	267	1412	1801
TGME49_208080	15	11	7	5	18	17	57	86
TGME49_208090	122	92	28	78	101	52	228	351
TGME49_208200	453	473	208	314	584	354	1639	2729
TGME49_208300	481	431	249	472	627	454	1528	2404
TGME49_208310	265	260	93	200	352	255	1105	1611
TGME49_208320	215	193	72	169	276	238	957	1293
TGME49_208330	2	0	0	0	1	0	6	12
TGME49_208340	691	620	240	423	618	529	2073	2973
TGME49_208350	288	279	127	186	294	219	1262	1688
TGME49_208360	220	178	72	110	146	153	804	969
TGME49_208370	2270	2057	689	1350	2252	1827	13413	16691
TGME49_208380	0	0	0	0	0	0	0	0
TGME49_208390	232	304	172	185	352	221	996	1337
TGME49_208400	732	797	248	403	632	435	2001	2738
TGME49_208410	253	214	89	188	274	206	1228	1542
TGME49_208420	469	319	118	215	341	289	2036	2383
TGME49_208430	247	199	97	150	417	281	1298	1581
TGME49_208440	874	802	615	936	1472	1035	3319	4945
TGME49_208450	3800	3280	877	1539	4745	3069	20322	27590
TGME49_208460	1	0	0	0	0	0	0	1
TGME49_208470	0	0	0	0	0	0	0	2
TGME49_208480	0	0	1	0	0	0	0	2
TGME49_208490	325	328	95	252	348	233	1366	1788
TGME49_208500	910	955	370	719	981	677	4082	5347
TGME49_208510	458	473	153	284	296	268	2310	2536
TGME49_208530	944	882	398	659	1349	973	3508	4653
TGME49_208540	265	272	116	186	291	176	711	1116
TGME49_208550	736	553	193	398	701	556	2916	3804
TGME49_208560	586	456	251	419	527	511	1941	2797
TGME49_208570	1225	1091	434	888	1276	1018	4451	6246
TGME49_208580	410	401	158	289	360	223	1310	1765
TGME49_208590	1192	1041	363	711	1238	915	3593	4927
TGME49_208710	142	174	43	107	260	172	808	989
TGME49_208718	1328	1266	401	837	1287	897	3924	5397
TGME49_208722	369	349	118	174	332	263	1309	1734
TGME49_208730	365	364	976	1806	2261	1623	12527	17549
TGME49_208740	250	234	225	387	696	483	3530	5755
TGME49_208750	432	393	175	313	511	384	1185	1845
TGME49_208760	23	6	21	50	116	78	361	411
TGME49_208770	2	1	3	14	26	10	73	89
TGME49_208780	372	302	226	381	501	349	1494	2116
TGME49_208790	801	706	305	525	1027	642	2478	3416
TGME49_208800	660	609	242	439	973	552	2388	3669
TGME49_208810	5	6	33	40	43	22	288	373
TGME49_208820	208	190	171	337	374	232	1235	1539
TGME49_208830	4326	3185	2129	3591	4453	3371	8904	14840
TGME49_208842	1342	1260	479	922	1040	861	2874	4171
TGME49_208850	203	163	58	154	381	232	595	1147
TGME49_208910	358	398	127	240	415	266	749	1221
TGME49_208970	936	670	321	622	992	707	2801	4163
TGME49_208980	121	105	44	72	151	102	418	531
TGME49_208990	158	205	112	191	253	165	672	921
TGME49_209000	706	854	189	333	551	510	2323	2958
TGME49_209005	0	0	0	2	0	0	4	15
TGME49_209010	153	127	73	112	210	153	376	626
TGME49_209020	110	126	43	71	121	95	312	433
TGME49_209030	28156	25204	11078	18635	36439	26809	77609	116781
TGME49_209040	0	0	0	0	4	4	17	21
TGME49_209045	1	0	4	21	40	47	97	142
TGME49_209050	778	754	214	355	1019	732	2011	3045
TGME49_209060	486	483	190	385	471	323	1131	1618
TGME49_209070	547	563	170	369	580	405	2084	2711
TGME49_209080	326	385	93	207	307	210	1462	1765
TGME49_209090	478	579	223	341	487	353	856	1483
TGME49_209095	349	299	191	391	474	356	774	1189
TGME49_209100	502	490	207	371	607	397	1748	2616
TGME49_209108	158	213	100	129	339	157	590	912
TGME49_209112	67	34	18	22	62	38	203	254
TGME49_209120	217	154	86	154	261	144	564	882
TGME49_209130	206	251	75	120	167	148	532	673
TGME49_209140	463	471	170	347	377	308	962	1397
TGME49_209150	849	764	265	476	662	535	1725	2585
TGME49_209160	749	757	366	601	1104	818	1928	2976
TGME49_209170	761	720	182	333	747	554	1691	2482
TGME49_209180	9	13	13	37	46	35	182	258
TGME49_209190	338	329	117	216	412	253	1099	1555
TGME49_209200	642	614	161	381	731	548	1975	2867
TGME49_209210	736	893	246	519	851	655	3066	4150
TGME49_209230	4	1	0	0	4	0	15	17
TGME49_209240	186	141	73	124	249	177	571	750
TGME49_209250	3649	4083	993	1918	3609	2715	11127	16011
TGME49_209260	2462	2678	945	1758	3350	2398	7236	11402
TGME49_209270	125	163	43	85	99	80	445	572
TGME49_209280	365	416	158	274	401	265	1196	1623
TGME49_209290	8288	8769	2576	4531	9769	6201	18693	32039
TGME49_209300	13	8	23	68	97	113	619	756
TGME49_209410	2	5	5	29	17	20	132	144
TGME49_209420	1440	1560	575	1036	1523	1020	3447	5395
TGME49_209430	374	334	220	332	526	383	1103	1784
TGME49_209440	479	551	142	279	275	208	1030	1296
TGME49_209450	960	914	352	558	962	676	3057	3985
TGME49_209460	127	98	45	86	152	107	453	662
TGME49_209470	0	1	4	3	2	6	24	34
TGME49_209480	0	0	0	7	1	1	3	11
TGME49_209485	3	1	6	0	7	9	40	41
TGME49_209490	476	419	104	181	620	494	3354	3933
TGME49_209500	825	888	247	426	726	513	3233	3866
TGME49_209510	1	0	0	1	3	4	40	47
TGME49_209515	0	0	0	0	4	1	8	9
TGME49_209520	262	263	106	197	236	199	1063	1233
TGME49_209530	113	106	25	53	125	68	339	421
TGME49_209540	102	65	37	51	88	63	268	424
TGME49_209550	129	98	49	92	127	93	468	460
TGME49_209560	0	1	0	0	0	1	4	1
TGME49_209570	177	186	69	144	287	205	837	1233
TGME49_209580	251	222	91	109	207	188	719	1062
TGME49_209583	1	0	0	1	2	0	5	1
TGME49_209585	0	1	1	4	4	1	9	27
TGME49_209590	0	0	0	2	3	3	7	19
TGME49_209600	2693	2466	871	1524	4273	3019	9441	14498
TGME49_209610	663	486	224	334	1005	762	2382	3455
TGME49_209620	1	1	11	6	14	8	93	96
TGME49_209630	110	123	66	79	146	146	466	724
TGME49_209640	62	68	20	41	53	53	291	354
TGME49_209650	272	264	75	166	255	152	668	932
TGME49_209670	38	35	10	26	60	25	152	238
TGME49_209680	207	196	110	159	281	240	801	1238
TGME49_209690	373	312	193	371	529	321	1215	1789
TGME49_209700	506	341	179	320	704	398	1641	2332
TGME49_209705	9	1	10	16	30	13	78	102
TGME49_209710	472	349	181	353	605	337	1065	1649
TGME49_209720	803	767	478	767	1324	963	2205	3560
TGME49_209730	350	361	117	228	354	282	998	1584
TGME49_209740	201	213	93	158	265	191	890	1248
TGME49_209755	10	20	29	31	76	33	945	1449
TGME49_209770	107	124	82	143	169	136	383	536
TGME49_209780	12	9	3	5	14	11	35	54
TGME49_209790	216	129	66	157	209	119	438	721
TGME49_209800	1354	1333	613	1011	1467	1109	4839	6973
TGME49_209810	1	0	0	0	9	8	26	41
TGME49_209820	117	77	54	121	171	90	335	495
TGME49_209830	26	38	22	30	69	60	141	228
TGME49_209850	1039	1179	502	953	1356	810	2487	4358
TGME49_209860	168	153	56	101	224	149	424	716
TGME49_209870	298	256	111	176	395	244	1064	1559
TGME49_209880	851	899	256	451	1065	700	2635	3704
TGME49_209890	1598	1418	522	893	1832	1184	5573	7878
TGME49_209900	291	237	143	247	391	283	620	988
TGME49_209910	6517	5035	3187	5116	9874	7290	19608	29932
TGME49_209920	1	3	5	3	9	9	47	84
TGME49_209930	176	147	74	116	273	190	1020	1263
TGME49_209940	183	152	72	164	251	196	778	1044
TGME49_209945	291	182	80	200	502	379	1185	1878
TGME49_209950	3110	2942	1314	2299	2679	2037	8080	10927
TGME49_209960	603	517	183	357	545	347	2092	2514
TGME49_209970	325	382	139	304	317	219	1031	1240
TGME49_209985	103	101	90	145	234	193	2200	3278
TGME49_210095	6	9	12	18	22	6	141	257
TGME49_210100	1	0	2	0	0	0	2	10
TGME49_321710	3	9	7	25	40	24	180	278
TGME49_321700	2	0	1	3	11	4	30	58
TGME49_321690	461	425	209	395	464	324	1418	1851
TGME49_321685	4	3	4	14	9	7	73	92
TGME49_321680	3723	3848	1898	3280	4768	2905	8995	13881
TGME49_321660	143	144	110	179	241	210	484	720
TGME49_321650	956	853	289	555	972	699	2629	3491
TGME49_321640	362	426	227	355	443	297	1048	1393
TGME49_321630	470	433	99	242	717	517	1533	2276
TGME49_321620	2465	2341	879	1505	2128	1833	6632	9289
TGME49_321610	126	95	31	72	131	88	394	483
TGME49_321600	693	766	183	356	1176	808	2319	3650
TGME49_321590	851	675	403	757	1069	779	2995	4450
TGME49_321580	0	1	3	4	2	1	32	43
TGME49_321570	644	658	190	442	934	666	1886	3034
TGME49_321560	480	527	191	430	586	435	1624	2272
TGME49_321550	629	687	288	546	709	460	1745	2601
TGME49_321540	556	683	197	375	745	529	1929	3051
TGME49_321530	1867	1790	560	1012	1925	1375	8960	11494
TGME49_321520	4624	4955	2107	3547	6523	4197	10332	16272
TGME49_321510	22	21	6	14	18	7	146	157
TGME49_321500	5749	5559	2078	4052	5542	4192	16311	23347
TGME49_321490	1	7	27	57	49	46	256	333
TGME49_321480	22	24	17	24	220	142	444	706
TGME49_321470	5	0	4	12	15	5	40	55
TGME49_321450	1012	1148	361	641	1027	786	3897	4951
TGME49_321460	0	0	0	0	0	0	0	0
TGME49_321440	1233	1214	440	780	1268	1043	4699	6464
TGME49_321430	73	45	22	44	64	40	165	250
TGME49_321420	573	626	194	277	616	475	1542	2256
TGME49_321410	702	812	220	469	556	416	1815	2595
TGME49_321400	0	0	0	0	0	0	0	0
TGME49_321390	12	8	13	13	64	32	206	219
TGME49_321380	2	2	0	0	0	1	4	11
TGME49_321370	235	279	85	103	241	160	704	909
TGME49_321360	1216	1013	266	438	1143	758	3147	4658
TGME49_321350	0	0	0	0	0	0	0	0
TGME49_321340	339	388	106	238	339	198	1180	1379
TGME49_321310	223	213	97	157	255	184	797	1053
TGME49_321320	4	0	0	0	1	0	0	4
TGME49_321300	221	198	95	157	256	167	912	1192
TGME49_321290	245	241	108	232	387	199	899	1399
TGME49_321280	0	0	0	0	0	0	0	0
TGME49_321270	0	0	0	0	0	0	0	0
TGME49_200700	39	36	27	18	58	38	128	220
TGME49_200590	294	209	82	155	486	354	1495	2130
TGME49_200595	6	2	7	15	133	67	394	726
TGME49_200600	0	0	0	0	1	0	1	4
TGME49_228780	282	254	46	115	270	188	992	1417
TGME49_228770	340	401	142	326	648	424	1265	2029
TGME49_228760	2163	1989	875	1460	2833	2250	7794	11187
TGME49_228750	537	558	133	269	430	321	1931	2261
TGME49_228730	190	206	72	100	140	119	556	704
TGME49_228720	157	138	38	90	185	111	359	575
TGME49_228710	96	77	23	54	96	72	221	336
TGME49_228690	484	558	268	333	521	401	1507	1878
TGME49_228680	13	8	6	18	57	42	243	276
TGME49_228670	319	388	62	121	231	157	756	1032
TGME49_228660	533	604	195	370	467	339	1699	2066
TGME49_228640	6	18	0	7	8	9	44	46
TGME49_228630	781	725	371	545	724	534	1964	2716
TGME49_228620	0	0	0	1	5	5	14	23
TGME49_228510	0	0	0	0	10	4	30	31
TGME49_228500	1	0	13	11	10	15	90	97
TGME49_228490	433	448	215	426	618	455	1393	2027
TGME49_228480	41	40	13	65	93	56	207	285
TGME49_228470	10335	10265	4204	7363	14976	9406	26815	45991
TGME49_228460	340	419	122	270	476	285	1083	1658
TGME49_228440	0	0	5	28	5	2	23	26
TGME49_228430	0	0	6	19	6	2	14	27
TGME49_228420	0	1	5	6	5	5	25	28
TGME49_228410	21	27	9	31	82	51	337	375
TGME49_228400	523	512	169	340	493	420	1631	2383
TGME49_228395	36	44	7	19	28	25	197	221
TGME49_228390	241	215	80	144	205	167	958	1087
TGME49_228380	136	106	44	79	143	77	547	673
TGME49_228370	347	232	103	173	440	294	890	1314
TGME49_228360	777	553	370	596	864	606	1738	2500
TGME49_228350	215	232	84	170	206	135	574	852
TGME49_228340	130	160	68	108	152	103	590	733
TGME49_228330	226	272	109	222	291	173	859	1169
TGME49_228320	122	130	59	97	151	101	647	832
TGME49_228310	4	0	0	0	7	2	35	25
TGME49_228300	178	146	83	108	188	139	398	534
TGME49_228290	978	990	537	853	1110	795	2257	3537
TGME49_228280	159	176	60	109	201	127	687	848
TGME49_228270	83	96	29	68	93	55	258	332
TGME49_228250	463	539	183	357	424	296	1577	2075
TGME49_228240	59	31	12	30	157	148	1885	2132
TGME49_228230	4019	3839	1129	2418	3135	2728	13905	17965
TGME49_228220	0	1	0	2	4	3	20	20
TGME49_228210	1097	953	463	851	1355	1063	3020	4384
TGME49_228200	764	717	312	537	836	633	2909	3834
TGME49_228190	1260	1042	765	1407	1532	1124	3318	4825
TGME49_228180	322	232	104	194	348	247	1102	1611
TGME49_228175	6	4	5	7	28	19	140	182
TGME49_228170	5401	4775	1172	2425	3648	2859	17739	22016
TGME49_228160	1512	1197	408	822	1618	1172	7502	10208
TGME49_228150	989	983	221	473	594	472	2680	3508
TGME49_228145	88	62	76	147	128	152	447	501
TGME49_228140	80	41	19	36	55	33	244	285
TGME49_228130	784	822	353	681	963	726	2941	4319
TGME49_228120	2472	2214	888	1706	2402	1760	7986	10582
TGME49_228110	270	211	104	181	437	294	993	1345
TGME49_228100	664	706	286	537	889	604	1688	2535
TGME49_228080	497	412	176	261	626	428	1355	1948
TGME49_228075	0	0	0	0	3	0	0	4
TGME49_228070	223	262	81	128	204	125	886	990
TGME49_228065	29	20	28	59	52	34	225	284
TGME49_228060	125	122	69	107	147	90	390	586
TGME49_228050	4	0	2	7	14	4	72	88
TGME49_228040	101	119	62	111	234	142	597	852
TGME49_228030	66	73	31	45	108	87	325	432
TGME49_228020	1	2	1	0	9	1	25	26
TGME49_228010	229	242	77	173	250	205	930	1211
TGME49_228000	511	389	242	398	591	395	1385	1987
TGME49_227995	8	7	3	12	10	10	44	52
TGME49_227990	148	138	53	95	141	148	424	628
TGME49_227980	176	149	75	133	186	188	815	1114
TGME49_227970	1882	1881	1005	1841	2381	1519	4988	7987
TGME49_227960	1344	1323	506	876	1541	1130	3486	5479
TGME49_227952	1033	892	269	448	1142	776	3321	4553
TGME49_227948	1613	1835	582	1016	1969	1269	4031	6320
TGME49_227940	0	0	0	0	0	0	0	0
TGME49_227930	570	602	173	337	460	361	1664	2354
TGME49_227920	420	383	162	232	549	432	1107	1805
TGME49_227910	1796	1779	794	1300	2759	1719	5040	7706
TGME49_227900	372	442	129	292	524	364	1379	2018
TGME49_227890	113	98	52	82	157	133	632	833
TGME49_227880	21	29	14	4	29	23	174	199
TGME49_227875	32	30	13	26	55	43	169	215
TGME49_227870	206	193	110	246	307	185	623	942
TGME49_227860	280	238	106	183	349	203	751	1081
TGME49_227850	139	154	66	76	157	120	426	635
TGME49_227840	675	647	192	350	1033	716	2076	3120
TGME49_227830	467	452	209	325	582	324	1242	1980
TGME49_227820	416	439	150	239	403	302	1426	1920
TGME49_227810	3159	2209	786	1313	3555	2676	7518	11475
TGME49_227800	612	661	173	363	654	541	2582	3096
TGME49_227790	278	186	128	217	310	256	981	1142
TGME49_227780	434	620	288	523	777	392	1456	1820
TGME49_227660	72	102	33	82	108	64	267	469
TGME49_227650	510	543	174	403	520	346	885	1494
TGME49_227640	176	149	53	134	150	99	336	486
TGME49_227630	53	48	357	773	968	960	8486	9988
TGME49_227620	55079	46402	17206	28657	65810	42369	186527	276910
TGME49_227615	61	53	26	47	65	42	565	650
TGME49_227610	956	878	324	600	863	714	6535	6829
TGME49_227600	6538	5878	3296	5516	10242	6658	17868	30606
TGME49_227590	2	1	0	2	6	6	47	61
TGME49_227580	1269	1009	367	606	1410	1162	4943	6090
TGME49_227570	1102	939	342	711	1687	1249	5089	6810
TGME49_227560	561	569	266	514	700	583	2869	3717
TGME49_227450	555	590	196	355	450	302	2366	2846
TGME49_227440	374	274	146	242	470	276	1553	2096
TGME49_227430	134	122	92	186	388	328	1418	2304
TGME49_227420	354	261	142	247	313	235	997	1241
TGME49_227410	192	198	57	116	184	108	547	632
TGME49_227400	42	34	35	62	64	61	194	275
TGME49_227390	221	214	71	182	278	141	613	884
TGME49_227380	3122	2542	1114	2299	2248	1813	9937	13187
TGME49_227370	7	7	145	302	247	166	700	872
TGME49_227360	11637	10749	4860	8783	16090	10234	27054	46960
TGME49_227350	375	351	143	244	271	241	952	1170
TGME49_227335	75	49	28	67	88	67	321	445
TGME49_227330	807	828	273	503	1028	673	2481	3624
TGME49_227320	223	217	144	303	292	258	1038	1224
TGME49_227310	124	132	107	178	136	113	666	670
TGME49_227300	108	94	47	114	96	60	481	642
TGME49_227290	1280	1191	780	1287	1653	1233	5695	7545
TGME49_227280	65157	53749	23629	39861	66385	44610	144213	223697
TGME49_227275	33	33	11	30	74	66	288	332
TGME49_227270	220	200	122	238	360	283	1276	1735
TGME49_227260	251	200	134	232	315	210	763	1203
TGME49_227150	1148	975	412	855	1288	986	4038	5969
TGME49_227140	112	68	35	62	150	104	330	434
TGME49_227130	4	8	0	1	1	3	10	14
TGME49_227115	163	107	49	106	170	193	561	683
TGME49_227100	2	0	5	7	16	10	47	82
TGME49_227090	4	8	8	13	54	37	124	179
TGME49_227080	80	78	40	49	193	104	379	583
TGME49_227070	3	4	0	0	4	0	20	41
TGME49_227060	359	308	154	226	334	227	1221	1609
TGME49_227050	371	317	102	188	322	234	1561	1892
TGME49_227040	0	0	0	0	0	0	0	0
TGME49_227030	898	626	316	608	1326	892	2460	3789
TGME49_227020	472	426	218	324	676	444	1702	2683
TGME49_227015	4	14	0	6	9	10	61	72
TGME49_227010	181	135	53	74	210	154	1055	1105
TGME49_227000	944	964	276	528	1005	815	2467	3400
TGME49_226990	264	285	45	98	390	275	1311	1591
TGME49_226985	17	8	6	12	32	34	66	126
TGME49_226980	972	977	509	764	1291	964	2954	4430
TGME49_226970	7861	8192	3373	5904	11368	7250	19095	32791
TGME49_226960	4376	4262	1891	3451	5726	4179	16095	22918
TGME49_226950	441	430	141	285	448	323	2749	2967
TGME49_226940	316	319	89	175	273	216	687	1141
TGME49_226930	1	1	0	1	0	2	12	19
TGME49_226925	8	1	3	6	7	8	52	54
TGME49_226920	558	520	186	364	548	329	1693	2289
TGME49_226910	520	431	160	319	526	414	1611	2109
TGME49_226900	357	292	143	264	427	256	1148	1518
TGME49_226890	235	277	90	178	207	172	614	854
TGME49_226880	1	1	2	2	3	13	35	32
TGME49_226870	301	210	159	270	362	311	1402	1891
TGME49_226860	2749	2261	703	1299	3453	2356	12136	16398
TGME49_226850	437	432	171	323	706	508	2618	2917
TGME49_226840	302	348	136	241	385	236	1203	1627
TGME49_226830	2291	2723	945	1708	2234	1564	5291	8453
TGME49_226825	0	0	0	2	0	3	19	3
TGME49_226820	10	10	6	13	17	23	63	77
TGME49_226810	458	450	165	274	346	290	1248	1557
TGME49_226800	81	95	22	67	81	61	412	474
TGME49_226790	228	227	79	182	250	158	915	1278
TGME49_226780	219	198	69	133	243	181	730	1034
TGME49_226755	1197	1281	332	648	1209	1010	4170	5454
TGME49_226740	1373	1202	327	671	1218	1033	5602	6510
TGME49_226730	1715	1615	717	1220	2118	1606	5757	7941
TGME49_226720	321	386	165	319	512	297	1455	2077
TGME49_226710	2935	2634	1137	1786	3655	2816	9156	13077
TGME49_226705	384	369	127	243	431	261	1279	1649
TGME49_226700	188	195	62	103	280	207	1009	1287
TGME49_226690	309	375	109	198	429	356	990	1432
TGME49_226680	849	881	230	470	941	699	2151	3286
TGME49_226670	142	176	58	103	206	164	576	830
TGME49_226660	612	704	177	331	588	432	2169	2686
TGME49_226650	198	125	60	84	216	158	447	704
TGME49_226640	115	76	50	74	173	168	514	668
TGME49_226620	263	256	59	107	216	172	756	877
TGME49_226610	6	5	5	2	38	20	70	110
TGME49_226600	376	288	128	209	458	367	1235	1651
TGME49_226590	2909	2976	1102	1860	3534	2564	8453	11883
TGME49_226580	1414	1155	648	1082	2195	1557	6756	9631
TGME49_226570	5019	4487	2542	4477	7488	5143	13530	21518
TGME49_226565	10	8	2	10	20	9	69	107
TGME49_226560	291	251	112	216	434	288	1276	1685
TGME49_226550	498	538	226	410	479	429	1280	2055
TGME49_226540	688	506	137	238	889	606	3576	4539
TGME49_226532	60	31	11	40	132	95	410	459
TGME49_226520	458	304	188	344	703	487	1866	2793
TGME49_226515	20	25	22	52	87	47	401	446
TGME49_226510	501	390	170	315	541	422	1669	2321
TGME49_226500	940	749	387	630	1387	992	3770	5375
TGME49_226490	0	1	10	12	4	5	34	45
TGME49_226480	111	98	69	113	125	95	284	396
TGME49_226470	823	741	251	410	683	474	2792	3745
TGME49_226460	92	69	75	118	147	129	643	719
TGME49_226450	3	2	4	3	11	6	17	40
TGME49_226440	382	352	142	259	409	294	1503	1916
TGME49_226430	2366	2035	962	1630	2644	1857	6941	9232
TGME49_226420	888	779	379	676	1670	1134	4110	6114
TGME49_226410	4017	4016	2605	4532	6642	4499	11574	19537
TGME49_226400	533	415	240	464	627	504	2327	2956
TGME49_226390	150	153	54	169	185	122	931	1105
TGME49_226385	1	7	10	10	5	4	113	107
TGME49_226380	2979	2581	1020	1850	2802	2202	14775	18287
TGME49_226370	363	325	99	177	369	313	1494	1844
TGME49_226350	166	153	65	122	196	157	748	890
TGME49_226340	833	797	253	470	1106	765	3025	4209
TGME49_226330	86	110	30	64	100	52	188	234
TGME49_226320	444	421	211	372	573	410	1869	2324
TGME49_226310	927	775	267	508	1375	1028	3308	4665
TGME49_226300	2	0	13	15	18	21	68	91
TGME49_226290	1888	1597	491	889	2719	2009	6430	9265
TGME49_226280	186	144	99	137	292	206	701	995
TGME49_226270	277	296	115	265	429	254	1031	1391
TGME49_226260	766	528	248	428	690	553	2530	3724
TGME49_226250	2454	2475	1179	2040	2367	1656	6137	8726
TGME49_226245	0	0	0	3	8	3	3	13
TGME49_226240	252	194	110	232	348	207	634	978
TGME49_226230	3	4	6	5	38	19	49	70
TGME49_226220	831	697	197	343	1008	880	2096	3275
TGME49_226110	7	14	12	19	35	30	170	230
TGME49_226100	35	46	29	64	90	55	392	473
TGME49_226090	154	153	50	100	127	98	379	628
TGME49_226080	196	177	88	141	208	144	578	726
TGME49_226072	1118	1124	294	744	1140	747	3385	4805
TGME49_226068	864	924	220	382	1021	675	2939	4373
TGME49_226060	932	809	327	645	999	793	3987	4898
TGME49_226050	478	437	179	335	445	309	1845	2518
TGME49_226040	559	478	165	232	1381	875	2219	3698
TGME49_226030	2511	2084	1002	1600	2912	2113	6567	9886
TGME49_220025	1	1	10	39	47	55	321	309
TGME49_226020	3532	2929	943	1758	3493	2514	12608	16313
TGME49_226010	72	71	24	66	169	104	343	555
TGME49_226000	846	577	500	879	1160	873	2317	3708
TGME49_225990	418	462	240	383	464	272	749	1112
TGME49_225980	210	234	120	198	309	197	808	1085
TGME49_225970	42	35	16	36	36	22	139	193
TGME49_225960	250	354	88	126	321	254	1090	1304
TGME49_225958	2	0	0	1	7	3	10	17
TGME49_225955	4	6	0	0	7	2	10	18
TGME49_225953	0	0	0	0	0	0	2	4
TGME49_225950	2	1	3	13	4	5	64	98
TGME49_225940	712	686	235	503	1076	677	2662	3631
TGME49_225930	1608	1361	753	1214	2580	1531	6234	9120
TGME49_225920	454	405	145	232	541	352	1906	2493
TGME49_225910	275	252	97	218	329	221	1249	1663
TGME49_225905	13	9	2	3	11	6	89	69
TGME49_225900	341	370	71	163	331	238	1017	1275
TGME49_225890	368	400	126	269	396	255	1313	1736
TGME49_225880	247	200	113	171	380	240	862	1142
TGME49_225870	1735	1754	437	933	1372	1053	5892	6952
TGME49_225860	735	696	236	311	801	574	2230	3479
TGME49_225850	632	599	190	376	720	471	3142	3814
TGME49_225840	362	307	103	215	305	301	1201	1641
TGME49_225830	542	532	165	293	596	423	1709	2594
TGME49_225820	387	279	113	166	388	289	2079	2756
TGME49_225810	604	580	269	419	641	506	1974	2763
TGME49_225800	328	324	159	233	315	240	1004	1316
TGME49_225790	915	628	201	261	904	570	3295	4460
TGME49_225780	480	493	161	321	546	391	1758	2428
TGME49_225770	312	256	113	153	218	178	954	1116
TGME49_225745	188	213	70	128	218	155	723	896
TGME49_225730	935	885	453	778	1265	894	3684	5111
TGME49_225720	189	135	66	110	164	162	587	683
TGME49_225710	151	114	81	127	174	148	563	711
TGME49_225690	1597	1622	401	759	1476	1035	4763	6417
TGME49_225680	336	277	123	212	591	387	1272	2133
TGME49_225590	0	0	0	1	1	0	9	17
TGME49_225580	375	306	167	312	520	377	1516	2239
TGME49_225570	0	2	3	5	11	9	121	134
TGME49_225560	5251	4599	1007	1897	5829	4348	16682	22803
TGME49_225555	2683	2082	1181	1886	3607	2501	8442	12570
TGME49_225550	1084	997	391	835	1388	996	3833	5609
TGME49_225540	1352	1152	431	755	1972	1359	9124	11805
TGME49_225530	1100	997	523	885	1286	850	2803	4249
TGME49_225520	16	28	3	14	20	17	82	99
TGME49_225510	1206	1166	433	753	1263	928	7860	9119
TGME49_225500	530	487	161	373	479	329	2334	2782
TGME49_225490	1845	1535	663	1205	1873	1706	9247	11182
TGME49_225480	392	346	116	203	473	392	1324	1805
TGME49_225470	586	421	167	309	720	506	1770	2590
TGME49_225460	1	1	2	4	18	9	54	68
TGME49_225450	149	116	52	132	162	121	539	787
TGME49_225440	97	118	22	59	111	76	409	578
TGME49_225435	0	0	0	0	0	0	0	0
TGME49_225430	70	44	43	44	68	48	395	412
TGME49_225420	233	188	92	191	327	230	638	922
TGME49_225413	1	1	5	2	4	3	10	18
TGME49_225410	225	203	123	149	291	188	763	982
TGME49_225400	2	3	2	2	7	6	48	57
TGME49_225380	131	148	94	160	232	152	503	648
TGME49_225370	2	1	10	17	11	0	16	27
TGME49_225360	156	204	79	143	269	167	440	691
TGME49_225350	300	291	144	260	357	257	972	1407
TGME49_225340	813	766	274	451	860	643	2435	3250
TGME49_225330	561	552	110	296	715	465	1570	2371
TGME49_225320	464	372	71	142	463	327	810	1310
TGME49_225315	8	1	6	16	55	42	108	165
TGME49_225310	711	573	308	569	927	566	2328	3498
TGME49_225300	725	638	161	377	1004	712	2663	3878
TGME49_225290	5	5	4	12	50	26	314	558
TGME49_225280	30	22	23	56	51	30	227	338
TGME49_225270	331	373	112	250	284	177	965	1136
TGME49_225260	787	748	364	731	732	642	2894	3682
TGME49_225250	198	179	107	174	330	204	735	1118
TGME49_225240	404	379	205	342	685	450	1691	2434
TGME49_225230	651	673	222	463	677	532	4062	4688
TGME49_225220	556	567	181	318	748	663	2639	3646
TGME49_225210	16	1	4	0	7	8	48	35
TGME49_225200	1514	1288	414	729	1330	1150	4042	5451
TGME49_225190	191	142	96	160	406	326	1358	1764
TGME49_225170	287	216	99	198	471	316	1644	2036
TGME49_225160	1644	1349	447	791	1829	1266	5551	7928
TGME49_225150	3139	2594	914	1673	3463	2751	10083	13513
TGME49_225140	5	2	4	17	24	24	89	126
TGME49_225130	208	180	68	119	192	123	679	875
TGME49_225125	593	675	252	516	608	383	1399	2009
TGME49_225120	5263	4368	1646	2832	5575	3772	12026	17808
TGME49_225110	835	868	414	910	1620	983	3601	4847
TGME49_225108	249	226	144	275	334	229	993	1295
TGME49_225105	78	82	155	349	233	195	1084	1233
TGME49_225102	12	10	11	12	23	13	50	88
TGME49_225098	12	8	11	19	31	20	56	89
TGME49_225090	525	539	151	280	515	333	1233	1700
TGME49_225080	7632	7275	3655	6409	12588	8080	20849	37607
TGME49_225070	12	3	23	45	63	28	165	215
TGME49_225060	416	397	174	296	468	317	1004	1443
TGME49_225050	1317	1381	610	1002	1369	889	2191	4032
TGME49_225032	0	0	0	0	0	0	3	2
TGME49_225028	1	0	0	3	1	1	5	25
TGME49_225024	0	0	0	0	0	0	0	1
TGME49_225020	753	826	210	401	865	635	2293	3297
TGME49_225010	732	706	220	425	537	419	2194	2673
TGME49_225005	88	55	34	56	91	43	202	274
TGME49_225000	901	1103	298	539	715	502	2466	3373
TGME49_224990	425	342	152	315	699	471	2252	2982
TGME49_224980	439	474	184	344	602	340	2033	2643
TGME49_224970	1012	1078	326	566	839	648	2740	3944
TGME49_224960	597	477	193	329	683	556	2536	3441
TGME49_224950	821	767	168	340	826	589	3411	4151
TGME49_224940	95	78	32	51	129	75	437	661
TGME49_224935	197	145	65	126	250	204	728	909
TGME49_224932	0	0	3	9	11	3	16	27
TGME49_224928	85	81	42	78	96	49	276	342
TGME49_224920	325	293	102	190	223	226	957	1033
TGME49_224910	382	346	138	243	369	240	779	1081
TGME49_224905	1	2	3	4	10	4	25	20
TGME49_224900	1205	1173	562	1016	1674	1226	3773	5544
TGME49_224890	571	521	199	314	604	467	2874	3401
TGME49_224880	565	475	92	166	414	355	1149	1484
TGME49_224870	412	400	165	302	343	273	1210	1719
TGME49_224860	214	143	114	155	195	162	859	1064
TGME49_224850	4699	4324	1601	2947	4447	3255	11135	15359
TGME49_224845	52	41	16	36	118	68	293	400
TGME49_224840	394	333	115	247	607	416	2044	2862
TGME49_224830	156	173	63	123	210	161	964	1202
TGME49_224820	231	207	144	192	307	315	990	1301
TGME49_224810	20	39	22	44	149	100	437	611
TGME49_224800	304	230	94	168	267	225	683	927
TGME49_224790	0	0	0	0	0	0	1	7
TGME49_224780	0	0	0	0	0	0	3	0
TGME49_224770	1	0	0	0	1	3	9	12
TGME49_224760	9	12	5	14	60	28	137	234
TGME49_224750	13	0	18	51	62	32	319	346
TGME49_224740	417	464	154	255	386	282	1251	1839
TGME49_224730	231	234	95	252	279	292	923	1331
TGME49_224720	370	272	97	197	278	223	838	1206
TGME49_224710	64	57	104	205	386	249	1440	1871
TGME49_224700	929	933	219	384	737	618	3453	4143
TGME49_224680	11	16	10	29	90	69	250	322
TGME49_224675	9	1	0	1	2	4	12	23
TGME49_224670	279	272	86	179	338	198	704	1079
TGME49_224660	436	454	151	355	465	284	1324	2037
TGME49_224650	263	216	104	180	356	217	1185	1464
TGME49_224630	82	94	22	56	138	89	867	935
TGME49_224620	472	340	118	214	540	424	2706	3645
TGME49_224610	317	318	179	218	379	264	967	1529
TGME49_224600	270	249	113	233	276	196	890	1124
TGME49_224590	225	219	100	176	263	154	943	1116
TGME49_224580	512	462	280	414	603	466	1591	2334
TGME49_224575	9	0	4	3	7	7	24	32
TGME49_224570	395	325	157	300	340	327	963	1357
TGME49_224560	17	12	6	14	39	24	90	113
TGME49_224540	559	706	162	284	820	579	1887	2435
TGME49_224530	1065	884	303	563	1179	967	2994	4169
TGME49_224520	1375	1064	470	816	1817	1365	4751	6104
TGME49_224510	281	295	99	170	204	147	589	846
TGME49_224500	0	0	0	0	0	0	2	0
TGME49_224490	138	138	59	80	158	81	359	452
TGME49_224480	761	721	379	716	934	688	4627	5350
TGME49_224470	895	657	204	347	700	540	3192	3906
TGME49_224460	5704	5444	1836	3305	5275	4056	15294	22634
TGME49_224350	1865	2037	837	1362	2382	1586	5458	8213
TGME49_224340	318	319	133	251	633	428	911	1584
TGME49_224330	761	708	286	495	728	473	2150	2864
TGME49_224320	53	89	24	72	107	71	462	495
TGME49_224310	441	347	145	291	485	409	1721	2150
TGME49_224290	1203	1147	450	849	1143	801	3073	4361
TGME49_224280	359	313	132	241	294	235	1006	1187
TGME49_224275	7	1	4	2	0	4	44	45
TGME49_224270	548	715	173	303	497	325	2138	2793
TGME49_224260	1128	1302	358	701	891	629	2764	3789
TGME49_224250	62	56	12	13	26	19	173	240
TGME49_224240	553	524	195	329	599	480	1984	2669
TGME49_224235	356	269	119	226	433	352	894	1375
TGME49_224230	163	162	36	81	234	134	796	1023
TGME49_224220	470	540	177	354	488	353	1395	1943
TGME49_224210	652	619	182	389	618	393	1736	2393
TGME49_224205	955	894	362	651	843	639	3023	3922
TGME49_224200	164	176	53	125	193	160	526	786
TGME49_224190	541	436	170	323	522	405	1442	2019
TGME49_224180	7	10	8	13	52	44	119	238
TGME49_224170	3	4	9	13	23	21	224	334
TGME49_224160	145	160	60	91	158	102	363	500
TGME49_224150	144	149	55	89	145	130	550	699
TGME49_224140	4	18	29	67	172	118	713	806
TGME49_224130	6080	4973	1918	3079	6536	3785	11146	18563
TGME49_224120	0	0	0	0	0	0	0	0
TGME49_224110	685	561	279	457	881	576	1778	2768
TGME49_224100	10	14	9	11	11	20	113	120
TGME49_224090	542	478	185	297	521	429	1966	2513
TGME49_224080	2	2	10	10	12	17	130	145
TGME49_224070	234	243	108	207	314	240	835	1157
TGME49_224060	1491	1496	511	937	1579	1240	4918	6606
TGME49_224050	581	595	256	443	713	479	2041	2648
TGME49_224030	355	309	99	178	378	249	1499	2116
TGME49_224040	0	0	0	0	0	0	0	0
TGME49_224020	285	244	190	294	540	322	1206	1821
TGME49_224010	0	1	4	6	16	14	103	95
TGME49_224000	931	942	247	432	1585	1150	3253	4931
TGME49_223985	682	776	143	276	508	428	2166	2479
TGME49_223970	205	152	86	186	222	178	573	818
TGME49_223960	549	537	224	462	709	549	1539	2273
TGME49_223950	380	376	160	366	488	391	1619	2065
TGME49_223940	7209	7581	2639	4660	9691	5951	19071	29867
TGME49_223930	1277	1062	500	922	1550	1094	5764	7696
TGME49_223920	4526	3700	1345	2602	4664	3762	12566	17760
TGME49_223915	0	1	3	7	15	5	65	80
TGME49_223910	610	513	207	390	660	534	2036	2552
TGME49_223900	3	4	10	12	30	25	113	190
TGME49_223880	566	672	204	361	501	419	2240	2783
TGME49_223870	89	91	35	114	200	147	723	887
TGME49_223855	351	385	94	217	353	259	1556	2418
TGME49_223845	19	23	8	19	26	23	161	204
TGME49_223840	969	938	334	612	702	692	2960	4104
TGME49_223830	3	1	1	7	16	20	71	75
TGME49_223810	633	577	189	370	749	629	2905	3681
TGME49_223800	464	459	142	267	661	343	1269	1945
TGME49_223790	821	684	221	429	923	619	2985	4181
TGME49_223780	393	378	128	226	375	256	899	1249
TGME49_223770	1	0	0	1	2	0	11	7
TGME49_223760	471	403	182	312	447	390	1637	2245
TGME49_223750	438	415	118	223	694	444	2626	3170
TGME49_223725	104	116	26	58	140	106	529	791
TGME49_223710	418	443	184	418	478	326	1000	1458
TGME49_223700	3	3	14	31	44	51	151	210
TGME49_223690	372	384	186	318	544	387	1546	2361
TGME49_223685	0	0	1	0	0	0	0	0
TGME49_223680	1346	1163	722	1169	1727	1172	4038	5877
TGME49_223672	459	400	133	260	409	359	1347	1867
TGME49_223668	202	171	101	185	415	249	639	1153
TGME49_223660	343	317	155	239	326	237	1117	1534
TGME49_223650	30	38	24	33	51	31	215	254
TGME49_223640	127	122	47	84	112	86	512	677
TGME49_223630	258	214	67	130	247	158	622	924
TGME49_223620	338	251	122	210	365	239	852	1143
TGME49_223610	612	755	118	226	595	431	1851	2554
TGME49_223600	204	182	83	186	299	205	1020	1269
TGME49_223590	1200	1081	553	944	1970	1320	3477	5602
TGME49_223580	184	190	69	114	246	176	686	962
TGME49_223570	627	685	210	444	960	587	2417	3492
TGME49_223560	151	116	46	102	262	172	636	1056
TGME49_223550	162	111	64	116	223	179	1309	1666
TGME49_223540	805	730	273	554	678	555	2144	3037
TGME49_223530	443	411	175	366	557	393	1754	2617
TGME49_223520	11	4	11	29	41	16	95	132
TGME49_223510	255	161	70	139	268	193	875	1294
TGME49_223500	203	215	111	166	279	164	607	798
TGME49_223490	328	257	170	318	493	325	892	1447
TGME49_223485	541	491	290	392	604	423	1503	2030
TGME49_223480	31	27	34	57	100	57	364	436
TGME49_223470	2	1	3	5	6	7	41	35
TGME49_223450	404	548	117	235	490	356	2013	2651
TGME49_223440	307	308	91	144	216	202	859	1152
TGME49_223430	17	12	16	25	108	52	198	358
TGME49_223420	251	209	94	161	311	192	692	916
TGME49_223410	1618	1435	774	1229	2032	1376	4749	7452
TGME49_223400	3	0	3	11	21	4	50	49
TGME49_223390	1308	1206	495	943	1300	912	4227	5910
TGME49_223270	222	195	79	174	273	172	936	1090
TGME49_223262	84	62	49	90	180	101	634	893
TGME49_223258	9	6	1	8	17	3	61	94
TGME49_212310	3215	2265	1333	2173	4152	2863	9109	13034
TGME49_212300	3800	3256	1122	2042	3296	2395	16412	20244
TGME49_212290	9186	7993	3838	7184	15075	9561	22478	38987
TGME49_212280	24	17	12	27	74	44	242	363
TGME49_212275	15	7	55	103	193	144	515	708
TGME49_212270	5035	3837	1509	2618	7453	5404	26709	35410
TGME49_212260	713	691	270	429	914	624	2246	3505
TGME49_212250	1178	1019	478	832	1133	867	4068	5193
TGME49_212240	3	2	13	14	36	15	70	63
TGME49_212230	0	0	0	0	0	0	0	0
TGME49_212220	1236	1295	505	956	1057	729	4205	5183
TGME49_212210	737	481	149	260	782	671	1928	2825
TGME49_212200	496	332	72	114	582	412	1219	1714
TGME49_212190	926	806	357	535	1083	778	2857	3976
TGME49_212180	10	14	16	13	32	45	126	157
TGME49_212170	245	239	134	299	596	413	1435	1977
TGME49_212160	143	144	38	72	321	184	749	1089
TGME49_212150	182	137	91	153	246	209	718	917
TGME49_212145	9	6	1	16	9	7	45	27
TGME49_212140	433	539	217	345	584	403	1533	2069
TGME49_212130	608	539	173	366	591	481	2560	3035
TGME49_212110	55	58	21	49	59	42	197	234
TGME49_212100	170	122	66	97	134	90	435	608
TGME49_212090	399	435	180	304	669	470	1850	2564
TGME49_212075	0	1	1	1	15	2	13	19
TGME49_212060	0	0	0	0	1	0	1	2
TGME49_212045	0	0	0	0	4	0	13	13
TGME49_212030	0	0	0	0	0	1	1	1
TGME49_211920	0	0	0	0	1	0	2	0
TGME49_211910	0	0	0	0	3	0	4	9
TGME49_211890	274	240	79	133	196	178	839	953
TGME49_211880	34	38	13	40	39	29	165	222
TGME49_211870	145	136	50	115	238	181	582	851
TGME49_211860	280	250	157	343	715	529	1654	2460
TGME49_211850	872	735	194	359	1201	903	2397	3392
TGME49_234165	4	0	2	1	2	3	33	42
TGME49_234180	898	772	201	361	1000	696	3643	5089
TGME49_234190	1971	1579	854	1696	2321	1842	5418	8107
TGME49_234200	100	87	42	55	122	66	222	357
TGME49_234220	439	474	168	287	527	369	1270	1769
TGME49_234230	688	900	237	434	875	444	2137	2843
TGME49_234250	1146	1180	348	672	1303	814	3392	4934
TGME49_234260	3	4	3	3	12	11	34	45
TGME49_234270	671	647	157	359	737	660	2758	3556
TGME49_234280	411	388	152	288	460	238	1365	1828
TGME49_234300	417	415	102	200	404	225	1172	1676
TGME49_234310	780	857	255	489	1072	585	2315	3342
TGME49_234340	44	51	26	27	50	40	158	236
TGME49_234350	374	328	76	198	368	283	1867	2258
TGME49_234360	680	630	257	507	684	568	2548	3189
TGME49_234370	145	110	48	101	479	278	1117	1758
TGME49_234375	0	0	1	0	7	2	19	10
TGME49_234380	3568	2798	850	1508	4308	2665	10300	15372
TGME49_234390	301	258	208	356	452	333	1395	1895
TGME49_234400	3	0	1	1	70	38	76	61
TGME49_234410	873	769	253	489	791	627	2901	3938
TGME49_234420	432	441	173	326	496	329	1052	1591
TGME49_234430	228	266	89	160	260	180	1095	1203
TGME49_234440	306	251	162	309	452	407	1455	2169
TGME49_234450	7868	6555	4253	6689	12524	8603	18824	31889
TGME49_234460	339	246	121	207	277	244	2144	2421
TGME49_234470	312	273	149	293	468	269	1292	1731
TGME49_234490	546	490	223	394	743	454	2010	2882
TGME49_234505	679	526	330	617	854	589	1754	2916
TGME49_234507	1	7	14	26	50	45	207	308
TGME49_234510	445	349	147	278	500	316	1315	1978
TGME49_234520	376	343	180	320	551	449	1586	2262
TGME49_234530	609	567	191	341	967	661	3062	4714
TGME49_234540	572	453	146	264	677	415	1785	2647
TGME49_234550	5670	4746	2613	4671	9060	5548	13832	24655
TGME49_234560	423	468	180	309	417	296	1156	1556
TGME49_234570	5	3	6	8	14	12	105	73
TGME49_234580	76	86	33	57	110	85	332	395
TGME49_234590	5	6	7	5	9	6	33	30
TGME49_234600	45	51	29	41	48	49	138	200
TGME49_234610	617	690	214	446	737	532	1773	2887
TGME49_234617	0	0	1	2	1	0	1	4
TGME49_234622	0	0	0	0	0	0	0	3
TGME49_234625	62	62	22	37	39	30	340	385
TGME49_234640	540	634	139	333	464	359	2145	2731
TGME49_234660	0	0	0	0	0	0	0	1
TGME49_234670	188	188	64	144	201	118	384	600
TGME49_234680	0	0	0	0	0	3	1	1
TGME49_234690	0	0	0	0	0	0	2	4
TGME49_234900	1290	1455	320	604	980	692	3756	4490
TGME49_234930	208	186	50	132	204	123	666	884
TGME49_234940	112	120	96	116	272	168	1276	1615
TGME49_234950	449	347	105	222	569	348	2843	3596
TGME49_234970	391	461	159	319	431	263	1239	1893
TGME49_234980	405	416	131	240	425	283	1468	1892
TGME49_234990	450	418	176	330	436	281	1795	2440
TGME49_235000	8	6	33	23	80	73	236	369
TGME49_235010	11	4	9	35	51	33	179	239
TGME49_235020	1209	1158	451	795	984	836	2983	3934
TGME49_235130	994	825	300	522	1099	897	3803	4611
TGME49_235140	1670	1352	638	1164	1358	1082	5458	7243
TGME49_235150	980	807	514	807	1125	851	2919	4365
TGME49_235160	1206	1062	440	824	1088	892	3235	4072
TGME49_235170	1197	1161	486	936	1129	911	3634	5273
TGME49_235180	5	5	4	9	19	11	73	84
TGME49_235183	7	7	5	18	58	46	174	261
TGME49_235187	1	2	3	7	62	44	152	289
TGME49_235190	1	0	8	9	94	39	231	356
TGME49_235200	0	1	0	1	7	0	8	20
TGME49_235315	3	3	6	9	28	12	106	99
TGME49_235340	2198	1868	597	1059	2384	1709	6095	8225
TGME49_235350	320	300	123	289	379	273	1611	2254
TGME49_235360	69	71	45	50	104	85	349	525
TGME49_235370	2953	2309	795	1400	2337	1883	7228	9405
TGME49_235380	791	638	268	493	1010	826	2905	4042
TGME49_235390	5	4	15	32	75	37	287	318
TGME49_235398	371	392	171	250	506	355	1146	1485
TGME49_235402	133	137	47	108	165	96	579	758
TGME49_235420	1126	1346	318	623	983	691	3891	4665
TGME49_235430	46	49	11	44	43	45	295	231
TGME49_235440	119	117	69	104	211	137	623	848
TGME49_235450	854	786	326	670	977	811	3280	4356
TGME49_235460	166	124	44	101	217	167	848	995
TGME49_235470	8558	8129	3122	5279	9947	7032	24448	35655
TGME49_235478	432	386	127	244	421	291	1351	1800
TGME49_235490	628	666	179	374	467	425	1726	2134
TGME49_235500	312	304	142	254	393	255	1200	1704
TGME49_235515	69	73	39	82	144	88	402	554
TGME49_235540	2037	2018	1202	2192	2881	2154	5515	9505
TGME49_235550	106	96	43	96	149	104	544	618
TGME49_235560	123	91	37	97	134	117	578	795
TGME49_235580	0	1	1	0	2	2	16	25
TGME49_235590	0	0	0	0	0	0	0	0
TGME49_235600	0	0	2	5	8	0	20	26
TGME49_235610	175	140	93	132	178	152	456	591
TGME49_235620	457	445	191	340	552	433	1524	2365
TGME49_235630	727	650	226	358	729	503	1546	2489
TGME49_235635	131	99	47	76	139	97	322	500
TGME49_235640	114	124	30	82	85	88	270	329
TGME49_235650	3	4	10	25	22	18	67	155
TGME49_235660	300	263	123	233	317	250	842	1231
TGME49_235670	112	91	34	80	172	111	454	579
TGME49_235680	2499	2525	813	1564	2385	1898	10218	12901
TGME49_235690	3310	3068	847	1605	4124	2692	8967	14085
TGME49_235700	251	269	111	207	328	274	1073	1479
TGME49_235710	343	309	128	246	339	268	938	1217
TGME49_235720	155	134	57	103	159	92	497	653
TGME49_235730	189	199	89	153	177	118	527	621
TGME49_235740	342	398	147	261	352	304	1301	1696
TGME49_235750	271	242	95	182	279	247	1075	1283
TGME49_235860	11	6	8	22	77	54	176	293
TGME49_235870	1	0	2	0	3	3	12	20
TGME49_235875	0	0	2	0	7	4	20	21
TGME49_235880	685	634	284	505	785	530	1645	2702
TGME49_235890	40	41	25	64	95	62	295	311
TGME49_235905	114	116	84	167	168	126	391	571
TGME49_235920	665	561	255	433	1045	844	2700	3741
TGME49_235930	4274	4033	1604	2911	4331	3145	11400	16844
TGME49_235940	0	0	0	0	0	0	14	12
TGME49_235950	1	0	18	22	22	20	103	99
TGME49_235960	162	138	103	155	263	206	705	1012
TGME49_235970	2014	1677	1110	1961	2287	1677	4762	6988
TGME49_235980	345	341	163	273	336	243	933	1264
TGME49_235990	226	247	90	182	288	167	1014	1323
TGME49_236000	163	165	21	105	159	151	632	854
TGME49_236010	880	724	385	641	1275	957	5500	7768
TGME49_236020	0	1	0	2	2	7	50	62
TGME49_236030	131	148	53	85	144	121	602	800
TGME49_236040	3949	4073	1017	1906	5791	3322	10249	17593
TGME49_236050	154	142	82	135	410	326	1326	1906
TGME49_236060	918	937	145	261	891	637	2531	3918
TGME49_236070	654	580	143	265	921	568	3944	5337
TGME49_236080	719	677	273	540	799	670	2810	3495
TGME49_236110	419	397	218	327	515	349	1291	1963
TGME49_236120	5	8	1	10	17	13	72	115
TGME49_236130	91	119	53	96	108	73	279	427
TGME49_236140	93	102	72	88	115	99	341	561
TGME49_236150	1	2	3	2	2	5	3	13
TGME49_236160	352	436	124	268	492	294	1459	2042
TGME49_236153	26	20	7	10	17	11	73	76
TGME49_236158	1	1	0	0	7	0	5	22
TGME49_236190	414	380	268	360	586	459	1467	2201
TGME49_236200	511	583	157	255	510	352	2069	2879
TGME49_236210	1543	1473	702	1332	1939	1334	4490	6803
TGME49_236220	154	145	76	173	186	128	422	583
TGME49_236230	5	1	0	1	1	0	4	7
TGME49_236240	414	369	100	187	288	232	907	1298
TGME49_236250	196	195	88	172	267	188	690	925
TGME49_236260	295	325	137	158	376	259	891	1335
TGME49_236270	143	160	62	119	181	144	438	632
TGME49_236280	93	86	45	90	105	64	327	417
TGME49_236290	2	4	6	13	28	4	46	96
TGME49_236400	21	17	19	20	55	26	140	232
TGME49_236510	406	433	116	264	447	370	1686	2068
TGME49_236520	218	273	112	182	317	269	1218	1574
TGME49_236530	296	306	120	213	311	272	959	1411
TGME49_236540	3168	3337	1607	2806	3966	2880	10715	15359
TGME49_236550	1795	1755	806	1494	2540	1725	5293	8430
TGME49_236560	748	713	207	396	686	492	2789	3347
TGME49_236570	1517	1306	788	1327	2030	1472	4725	7276
TGME49_236580	1968	1760	798	1467	2693	1789	4911	7893
TGME49_236595	1	3	3	2	7	4	60	83
TGME49_236620	428	291	75	180	737	512	2849	3388
TGME49_236630	1819	1572	568	954	1853	1310	6051	8280
TGME49_236635	2	2	0	3	3	3	16	30
TGME49_236640	615	519	173	364	591	452	2068	2802
TGME49_236650	5407	4570	2258	4242	5625	4101	20186	27732
TGME49_236660	706	749	216	449	768	534	2497	3365
TGME49_236670	177	135	75	171	169	139	655	913
TGME49_236780	222	243	110	175	229	153	610	807
TGME49_236790	171	174	64	153	236	155	693	1085
TGME49_236800	165	131	74	102	210	158	408	688
TGME49_236810	0	0	0	0	0	0	0	0
TGME49_236820	343	373	139	250	440	282	1244	1804
TGME49_236830	0	0	0	0	0	0	0	0
TGME49_236840	503	580	209	436	532	355	1495	2069
TGME49_236850	564	686	164	360	562	478	1646	2350
TGME49_236860	328	273	104	164	454	374	1470	2112
TGME49_236870	1469	1022	547	833	2282	1590	6662	9677
TGME49_236880	13	16	7	15	32	26	224	234
TGME49_236890	1290	1078	285	477	1209	806	5523	7533
TGME49_236900	1	2	8	9	17	7	148	166
TGME49_236910	1447	1218	676	1053	1779	1306	3803	5920
TGME49_236920	809	650	346	606	944	755	2760	3852
TGME49_236930	211	324	146	213	289	204	770	980
TGME49_236940	0	0	8	8	8	13	36	59
TGME49_236950	5741	4278	3978	6202	8922	6390	13444	21841
TGME49_236960	1072	854	352	589	1492	1032	2989	4516
TGME49_236970	1466	1520	627	1162	1251	901	5105	6368
TGME49_236975	0	0	0	0	0	0	5	6
TGME49_236980	267	205	55	119	190	140	694	907
TGME49_236990	283	203	121	245	273	265	943	1248
TGME49_237000	570	402	144	277	416	331	1098	1601
TGME49_237010	605	493	379	702	703	558	2492	3103
TGME49_237015	1610	1309	525	995	1998	1555	7621	11327
TGME49_237020	404	325	211	352	485	376	2386	2714
TGME49_237045	0	1	0	5	5	3	37	52
TGME49_237060	0	0	0	0	0	0	1	0
TGME49_237070	5	6	8	3	47	19	132	201
TGME49_237080	2	3	4	11	61	21	49	105
TGME49_237090	1234	1240	368	703	1006	780	3457	4478
TGME49_237100	193	162	76	110	176	130	893	1091
TGME49_237110	476	397	205	400	523	444	1580	2267
TGME49_237130	220	139	278	304	916	484	859	1304
TGME49_237120	0	0	0	0	0	0	0	0
TGME49_237140	324	309	136	265	448	330	1087	1680
TGME49_237150	2452	2108	799	1699	2450	1845	7602	10713
TGME49_237160	271	320	122	171	305	184	974	1102
TGME49_237170	163	150	116	137	326	206	1030	1834
TGME49_237180	803	773	291	493	1449	1013	2724	4079
TGME49_237190	269	191	77	155	345	264	934	1304
TGME49_237195	218	183	58	133	322	255	734	1067
TGME49_237200	1074	896	324	580	1328	979	3307	4855
TGME49_237210	564	474	159	299	678	512	1861	2704
TGME49_237220	996	1054	437	839	988	743	2610	3962
TGME49_237230	5220	5029	1041	1877	4684	3126	19730	26688
TGME49_237240	660	597	306	532	950	707	3420	4837
TGME49_237250	1122	955	504	899	1395	1065	3527	4857
TGME49_237260	608	447	238	465	789	599	2265	3125
TGME49_237270	117	107	28	46	118	80	423	599
TGME49_237280	1117	1100	255	510	884	643	3085	3812
TGME49_237290	645	733	246	535	638	479	2370	2975
TGME49_237410	407	427	123	278	416	304	1278	1574
TGME49_237425	87	108	41	54	70	64	200	283
TGME49_237450	32	46	25	62	52	52	496	477
TGME49_237460	175	130	76	122	137	105	720	864
TGME49_237470	442	416	195	394	478	383	1978	2496
TGME49_237480	287	330	83	170	266	177	800	1144
TGME49_237490	5	4	2	3	28	9	59	88
TGME49_237500	1006	943	270	421	851	582	3103	4032
TGME49_237510	189	187	120	226	404	248	1575	1991
TGME49_237520	382	441	152	278	441	270	1607	1997
TGME49_237530	279	238	84	168	363	258	866	1264
TGME49_237540	191	162	72	151	220	144	949	1272
TGME49_237550	263	276	88	213	269	253	1698	2103
TGME49_237560	2245	1678	1017	1766	2649	1963	6779	9584
TGME49_237570	433	396	247	446	647	462	2171	3042
TGME49_237585	15	9	3	7	65	56	653	665
TGME49_237595	26	15	0	6	20	23	129	181
TGME49_237600	344	308	146	245	285	224	1066	1475
TGME49_214070	14	8	7	3	13	3	115	90
TGME49_214080	2087	1370	687	1106	2109	1456	5809	9159
TGME49_214090	1042	1233	274	569	940	712	4270	5216
TGME49_214100	947	992	335	574	917	625	3041	3726
TGME49_214110	365	303	135	307	414	320	1525	1779
TGME49_214115	0	0	0	0	0	0	0	0
TGME49_214120	109	113	27	56	98	62	391	472
TGME49_214130	338	370	147	246	398	346	1331	1787
TGME49_214140	1460	1579	675	1192	1604	1099	4880	6672
TGME49_214150	443	455	162	265	309	248	1010	1440
TGME49_214170	306	306	157	281	406	285	1237	1631
TGME49_214160	0	0	0	0	0	0	0	0
TGME49_214180	1428	1359	480	895	1688	1077	4208	6081
TGME49_214190	250	236	77	149	258	208	702	1138
TGME49_214200	286	357	191	316	404	281	831	1361
TGME49_214210	2169	2383	1093	1925	2346	1599	6236	9045
TGME49_214220	3053	2529	1175	2102	5564	3376	16132	24283
TGME49_214230	276	250	100	193	236	194	672	888
TGME49_214240	486	522	178	310	495	375	1497	2078
TGME49_214250	1563	1086	777	1333	2579	1770	4959	7868
TGME49_214260	341	330	126	279	431	337	1486	1866
TGME49_214270	1910	2236	932	1631	2215	1441	3678	6104
TGME49_214280	308	205	80	164	242	184	942	1185
TGME49_214290	1741	1302	786	1398	1687	1345	3798	5659
TGME49_214295	4	4	5	14	15	14	108	130
TGME49_214300	488	478	192	417	438	376	1896	2281
TGME49_214310	272	237	111	216	348	293	1465	1965
TGME49_214320	3096	2491	1135	1908	3328	2636	10929	15167
TGME49_214330	0	0	0	0	0	0	0	0
TGME49_214340	259	308	186	393	480	284	1131	1682
TGME49_214350	1228	1186	431	826	1341	925	2152	3493
TGME49_214360	0	1	4	6	4	11	26	27
TGME49_214370	309	278	87	244	417	254	1087	1454
TGME49_214380	383	250	152	317	797	586	1885	2322
TGME49_214385	30	32	31	25	109	75	237	310
TGME49_214390	66	61	24	62	158	132	324	476
TGME49_214400	286	253	71	125	385	322	891	1417
TGME49_214410	1268	1009	358	629	1777	1252	8909	12307
TGME49_214420	8	7	4	8	23	8	246	205
TGME49_214430	105	93	78	179	391	256	2133	2429
TGME49_214440	3294	2984	1038	1976	2880	2178	10855	14472
TGME49_214450	23	11	6	7	13	10	41	67
TGME49_214470	295	257	99	159	374	319	989	1349
TGME49_214480	474	474	198	333	478	353	1348	1853
TGME49_214490	390	416	162	283	457	313	1048	1599
TGME49_214500	347	310	172	287	362	256	1016	1264
TGME49_214510	9	4	20	41	97	65	307	389
TGME49_214520	265	207	98	171	327	273	866	1258
TGME49_214530	337	292	117	234	478	392	1264	1832
TGME49_214540	611	516	270	536	917	511	1460	2558
TGME49_214545	23	17	18	18	45	24	79	129
TGME49_214550	2	4	8	10	10	16	17	55
TGME49_214560	623	709	280	535	632	427	2003	2646
TGME49_214570	0	1	4	6	5	1	25	30
TGME49_214575	911	614	998	1665	2666	1927	4768	7102
TGME49_214580	307	217	129	317	310	263	1261	1738
TGME49_214590	468	431	183	348	408	298	1260	1978
TGME49_214600	550	561	169	415	477	353	1528	1748
TGME49_214610	303	310	101	239	299	197	854	1109
TGME49_214620	331	323	147	270	413	367	1563	2048
TGME49_214630	236	307	81	152	254	191	734	1060
TGME49_214740	578	630	314	511	835	544	2675	3546
TGME49_214750	696	819	293	558	890	722	3099	4113
TGME49_214760	125	110	61	85	148	116	561	754
TGME49_214770	1001	874	442	795	1347	897	2585	3879
TGME49_214780	234	189	103	152	293	247	669	1084
TGME49_214783	0	1	0	0	1	2	6	3
TGME49_214787	0	0	0	1	1	3	3	5
TGME49_214790	2513	2576	1165	2133	3167	2046	5465	9097
TGME49_214800	88	123	84	140	198	154	734	996
TGME49_214810	193	175	81	133	270	187	779	1033
TGME49_214820	432	469	197	343	514	294	1773	2191
TGME49_214830	368	319	106	208	297	218	875	1182
TGME49_214835	31	26	13	33	56	40	217	270
TGME49_214840	4629	4673	1303	2687	3493	2671	14466	17673
TGME49_214850	137	93	67	137	128	103	406	577
TGME49_214860	0	0	0	0	0	0	0	0
TGME49_214870	175	135	64	92	203	108	512	672
TGME49_214880	2081	1775	613	1076	2044	1755	6447	8248
TGME49_214900	537	532	227	420	664	417	2299	2680
TGME49_214910	105	95	39	70	96	82	372	426
TGME49_214920	922	804	492	865	1074	732	3125	4511
TGME49_214930	0	0	0	0	0	0	0	0
TGME49_214940	15686	14264	4617	8388	15128	10869	59466	82966
TGME49_214950	2711	3018	1524	2839	4946	3421	13969	19094
TGME49_214960	346	456	109	185	362	215	1978	2080
TGME49_214970	2212	2000	1076	1976	2091	1559	5267	7763
TGME49_214980	1602	1579	442	877	1108	840	6711	8636
TGME49_214990	276	294	96	177	329	200	1356	1600
TGME49_215010	556	514	233	379	699	495	2324	2897
TGME49_215020	189	153	69	123	172	131	562	683
TGME49_215030	281	298	105	214	212	167	733	1070
TGME49_215040	545	601	188	351	578	495	1705	2493
TGME49_215050	29	42	9	20	33	23	148	146
TGME49_215055	6	5	3	3	15	7	32	48
TGME49_215060	954	802	367	617	1299	968	2289	3381
TGME49_215070	616	579	248	472	681	534	1761	2533
TGME49_215080	293	327	82	147	293	227	1050	1335
TGME49_215090	293	245	123	221	330	239	1026	1400
TGME49_215100	163	235	88	159	169	172	582	789
TGME49_215110	0	0	0	0	0	0	0	1
TGME49_215120	0	0	0	0	1	0	2	0
TGME49_215130	335	280	182	278	428	331	950	1402
TGME49_215140	5	4	7	8	23	27	139	118
TGME49_215150	2455	2573	932	1779	2873	2188	8297	11672
TGME49_215160	2573	2263	853	1551	1887	1668	8805	11502
TGME49_215165	0	0	0	0	0	7	17	6
TGME49_215170	989	851	359	647	1088	846	3799	5197
TGME49_215180	58	48	29	52	307	188	640	872
TGME49_215185	4	3	3	12	34	8	86	144
TGME49_215195	11	12	24	67	321	202	619	923
TGME49_215210	408	352	156	244	661	503	3659	4617
TGME49_215220	6771	5974	2305	4126	9249	6455	26548	35226
TGME49_215230	608	716	229	495	791	553	2410	3482
TGME49_215250	254	205	74	140	307	239	1269	1461
TGME49_215260	668	563	223	403	623	543	1770	2480
TGME49_215270	0	0	0	0	0	0	0	0
TGME49_215280	962	873	426	736	1370	1066	3280	4894
TGME49_215290	391	358	143	253	420	301	1959	2079
TGME49_215300	256	328	105	214	413	225	872	1341
TGME49_215320	1	1	1	0	7	6	25	38
TGME49_215328	0	0	0	0	2	0	2	8
TGME49_215340	12	9	32	56	90	50	154	188
TGME49_215343	7	5	3	15	41	10	71	139
TGME49_215347	96	98	127	198	308	222	813	1202
TGME49_215350	1472	1177	546	903	1697	1375	4688	6469
TGME49_215360	750	620	190	354	687	515	2568	3579
TGME49_215370	310	299	147	253	392	321	1057	1610
TGME49_215380	243	206	72	134	304	216	1051	1280
TGME49_215385	97	73	49	73	155	114	381	680
TGME49_215390	118	91	47	62	240	184	502	754
TGME49_215400	286	215	140	205	491	283	819	1356
TGME49_215410	0	0	7	11	7	12	54	63
TGME49_215420	249	214	118	203	280	263	699	988
TGME49_215425	755	602	336	584	917	567	1723	2766
TGME49_215430	721	472	290	563	774	603	1987	3113
TGME49_215440	556	510	174	276	633	542	2670	3546
TGME49_215450	346	369	196	283	661	397	1157	1826
TGME49_215460	9664	10288	4060	6808	14273	9344	21550	37192
TGME49_215470	10279	9946	4519	7639	15594	9609	25383	43311
TGME49_215480	280	261	86	163	348	256	1454	2028
TGME49_215490	2840	2226	1352	2057	3609	2559	9079	13581
TGME49_215500	58	55	55	102	212	156	510	726
TGME49_215510	576	496	160	343	868	583	2487	3458
TGME49_215520	654	465	225	398	675	478	1794	2428
TGME49_215530	3523	2611	875	1323	4086	2738	6353	10288
TGME49_215540	10	6	3	4	32	34	64	99
TGME49_215550	211	227	112	163	174	86	594	743
TGME49_215560	182	197	88	179	153	116	450	583
TGME49_215570	341	324	68	155	279	199	1068	1439
TGME49_215580	31	22	7	13	41	18	155	163
TGME49_215590	1894	1920	837	1527	2441	1742	6746	9576
TGME49_215600	367	388	138	269	475	291	1320	1900
TGME49_215610	603	452	278	530	805	573	1898	2792
TGME49_215620	214	228	94	186	181	145	735	890
TGME49_215640	609	636	141	288	564	446	1841	2470
TGME49_215650	0	0	0	0	0	0	0	0
TGME49_215660	169	174	88	172	203	151	490	679
TGME49_215670	1	1	2	3	10	20	84	102
TGME49_215680	296	221	88	131	624	358	1400	2199
TGME49_215690	190	267	92	173	292	191	613	1065
TGME49_215700	345	346	109	197	309	214	814	1082
TGME49_215710	296	258	91	174	225	183	920	1161
TGME49_215730	297	246	159	249	432	289	994	1389
TGME49_215740	285	279	167	255	394	236	1114	1599
TGME49_215750	84	105	37	95	91	80	467	604
TGME49_215775	3643	3302	1112	1836	4484	2838	10467	16172
TGME49_215785	1609	1368	396	702	1633	1089	4143	6117
TGME49_275310	834	750	194	397	937	660	3183	4243
TGME49_275320	1360	1179	392	783	1243	1006	4865	5991
TGME49_275330	236	195	123	177	289	178	824	1104
TGME49_275350	341	270	109	212	357	306	921	1166
TGME49_275340	0	0	0	0	0	0	0	0
TGME49_275355	14	12	10	11	69	46	255	391
TGME49_275360	8	5	2	7	52	29	141	235
TGME49_275370	182	132	63	133	242	152	395	674
TGME49_275380	1	1	0	2	11	8	8	25
TGME49_275390	37	53	24	69	110	62	126	235
TGME49_275400	22	12	5	10	12	14	107	97
TGME49_275410	113	147	49	109	140	84	419	630
TGME49_275420	301	341	102	214	317	201	848	1094
TGME49_275430	439	530	205	346	429	340	1122	1691
TGME49_275440	37294	36124	11736	19624	43640	30215	128405	188154
TGME49_275450	744	772	215	413	523	394	2270	2834
TGME49_275460	829	649	158	309	896	587	3177	4524
TGME49_275470	544	402	190	308	419	359	2305	2993
TGME49_275480	1213	1147	520	1122	1545	1098	5108	6570
TGME49_275490	464	535	228	392	458	323	1436	1978
TGME49_207005	3	10	2	4	12	4	12	29
TGME49_207010	8	6	2	8	11	7	23	39
TGME49_296640	4	0	3	2	1	2	15	16
TGME49_207015	1	0	1	4	12	7	9	17
TGME49_207020	104	91	46	79	140	87	476	565
TGME49_207030	7	8	1	8	19	10	78	70
TGME49_207040	148	164	48	93	139	111	465	629
TGME49_207050	6	0	2	2	3	19	47	68
TGME49_207060	3553	3260	1567	2696	3487	2708	9585	13774
TGME49_207065	147	111	80	194	222	153	616	918
TGME49_207070	96	95	31	55	102	78	482	540
TGME49_207080	258	301	110	150	231	162	699	1067
TGME49_207100	338	318	141	250	339	245	866	1174
TGME49_207110	1	6	0	4	1	0	24	18
TGME49_207120	245	218	87	161	208	101	674	886
TGME49_207130	3	5	4	8	15	3	60	79
TGME49_207140	43	13	32	34	102	87	299	418
TGME49_207150	4	0	7	10	18	9	158	211
TGME49_207160	3	5	7	16	71	25	274	359
TGME49_207170	1042	959	633	1016	1655	1185	3199	5014
TGME49_207180	213	181	81	172	173	137	781	967
TGME49_207200	162	176	55	93	134	108	403	566
TGME49_207210	4	13	7	12	34	17	246	383
TGME49_207230	254	277	109	202	391	271	1752	2354
TGME49_207240	928	770	210	387	934	741	2584	3913
TGME49_207250	11	7	9	20	111	46	189	298
TGME49_301890	63	44	34	66	376	207	801	1514
TGME49_276230	110	74	18	48	67	47	100	151
TGME49_276220	320	275	101	154	308	241	836	1379
TGME49_276210	588	476	205	347	680	466	1632	2373
TGME49_276200	15	12	9	28	46	30	104	172
TGME49_276190	195	153	91	164	167	123	482	597
TGME49_276180	659	709	190	431	569	410	1875	2345
TGME49_276170	2851	3259	899	1786	2502	1654	13289	16053
TGME49_276155	12	8	20	27	63	45	148	214
TGME49_276140	3470	3183	1407	2808	4036	2977	9463	13385
TGME49_276130	620	618	166	352	677	496	1633	2281
TGME49_276120	461	381	77	169	520	326	1006	1466
TGME49_276110	366	325	176	296	419	320	828	1314
TGME49_276100	263	259	74	145	336	251	636	963
TGME49_275990	529	578	152	319	689	413	1443	2173
TGME49_275980	269	203	103	197	369	230	864	1129
TGME49_275970	43	31	74	133	166	112	500	691
TGME49_275870	199	186	105	183	306	240	1378	1702
TGME49_275860	4096	3358	772	1603	3665	2576	12562	17322
TGME49_275850	37	31	38	94	115	104	403	486
TGME49_275840	152	173	72	92	177	109	550	715
TGME49_275830	112	100	42	83	164	130	456	579
TGME49_275820	0	1	0	1	2	0	4	7
TGME49_275810	6089	5084	2558	4301	8437	5468	13579	22532
TGME49_275802	765	807	316	652	877	644	3031	4086
TGME49_275798	3	2	4	2	3	6	37	60
TGME49_275795	0	0	0	0	2	3	14	20
TGME49_275790	0	2	4	6	5	13	98	114
TGME49_275780	159	193	77	121	189	148	473	831
TGME49_275770	397	412	108	189	459	287	1026	1431
TGME49_275760	26	22	20	50	79	42	245	271
TGME49_275755	136	155	83	157	233	150	640	986
TGME49_275750	391	348	158	339	437	314	1022	1555
TGME49_275740	141	158	57	121	206	145	622	956
TGME49_275710	1	3	0	6	11	12	20	25
TGME49_275700	0	0	0	0	3	2	20	9
TGME49_275690	2311	2180	903	1672	2480	1995	6482	9450
TGME49_275670	1329	1050	380	638	1470	1214	2795	4346
TGME49_275680	0	0	0	0	0	0	0	0
TGME49_275660	7	9	157	292	200	132	259	435
TGME49_275650	1411	1267	737	1300	1418	1185	2171	3454
TGME49_275640	790	768	280	455	1344	887	4190	5566
TGME49_275630	798	642	227	477	747	607	2134	2776
TGME49_275610	1361	1253	499	802	1146	961	3347	4660
TGME49_275600	0	3	0	6	11	9	21	32
TGME49_275590	2	1	28	61	67	69	285	383
TGME49_252090	2	6	20	18	33	34	85	110
TGME49_252080	14	11	32	62	92	54	256	311
TGME49_252070	126	95	42	92	159	138	684	765
TGME49_252065	154	151	24	55	125	98	607	720
TGME49_252190	407	309	38	108	291	182	1295	1493
TGME49_252200	528	389	153	259	534	437	1448	2100
TGME49_252210	2123	1887	873	1618	2327	1903	10251	14618
TGME49_252220	727	549	331	540	879	630	1983	3201
TGME49_252230	307	268	144	261	418	256	901	1307
TGME49_252250	167	128	64	112	142	108	576	694
TGME49_252255	10	7	2	2	13	19	65	82
TGME49_252260	57	56	48	37	208	124	436	674
TGME49_252270	228	150	94	174	243	187	623	1027
TGME49_252280	260	321	99	212	324	205	559	925
TGME49_252290	580	590	191	384	410	317	1627	2037
TGME49_252295	835	898	370	681	822	655	2211	3165
TGME49_252300	0	0	0	6	5	10	16	38
TGME49_252310	372	351	124	296	421	284	937	1517
TGME49_252320	201	191	87	190	325	156	821	1175
TGME49_252330	2	1	5	4	8	1	27	32
TGME49_252340	584	584	272	443	695	454	1566	2449
TGME49_252350	14	1	5	2	43	18	129	152
TGME49_252360	2280	1915	705	1212	3230	2152	5265	9214
TGME49_252370	4	6	6	4	14	7	46	52
TGME49_252380	446	552	214	476	906	597	3268	3994
TGME49_252385	33	29	14	35	83	80	426	468
TGME49_252390	1694	1441	390	727	2003	1463	5692	7919
TGME49_252395	11	7	8	16	17	13	140	193
TGME49_252400	104	176	24	76	173	111	487	681
TGME49_252410	31	17	5	7	34	11	74	123
TGME49_252420	148	179	46	85	201	97	473	637
TGME49_252430	1079	1235	264	507	959	667	3600	4599
TGME49_252440	86	84	35	78	118	67	243	383
TGME49_252450	49	49	30	47	105	76	285	372
TGME49_252465	76	54	22	91	113	62	309	368
TGME49_252480	68	67	29	52	85	61	257	388
TGME49_252490	226	194	85	141	255	193	490	818
TGME49_252500	1353	950	385	685	1592	1075	4184	6133
TGME49_252510	357	330	82	144	602	461	1935	2710
TGME49_252620	72	48	34	56	77	69	269	416
TGME49_252630	1198	889	558	1007	1969	1275	3602	5735
TGME49_252640	1	5	2	8	8	12	118	166
TGME49_252850	84	65	47	61	100	76	395	514
TGME49_252860	4	3	6	4	19	6	56	62
TGME49_252870	89	111	37	78	132	70	432	570
TGME49_252880	1224	1434	327	500	1342	696	2224	3588
TGME49_252890	3	6	8	13	43	41	196	207
TGME49_252990	295	270	68	112	359	217	763	1046
TGME49_253000	594	685	200	319	688	554	2175	3062
TGME49_253010	0	2	3	2	0	1	14	14
TGME49_253020	543	497	186	434	694	461	2022	2940
TGME49_253030	235	294	83	140	706	371	1503	2209
TGME49_253035	55	44	15	28	39	39	113	180
TGME49_253040	88	98	24	66	84	72	233	410
TGME49_253050	42	41	16	26	35	30	182	235
TGME49_253060	107	119	27	63	90	116	372	467
TGME49_253070	171	187	84	147	237	128	532	824
TGME49_253080	1	1	1	1	8	8	21	17
TGME49_253090	343	287	110	229	422	233	986	1386
TGME49_253100	660	578	220	357	964	752	1864	2853
TGME49_253110	0	0	0	0	2	3	4	1
TGME49_253120	28	23	25	63	252	151	868	1014
TGME49_253130	713	518	177	295	800	582	2173	3090
TGME49_253140	322	312	108	157	517	428	1141	1613
TGME49_253150	3	1	4	9	32	20	64	101
TGME49_253160	203	203	81	136	245	167	640	786
TGME49_253170	823	713	242	423	846	594	2930	3977
TGME49_253290	1017	954	378	747	948	869	2719	3767
TGME49_253300	62	72	12	23	88	65	326	446
TGME49_253310	194	183	100	157	217	179	626	971
TGME49_253320	167	130	80	103	232	121	681	906
TGME49_253330	46	37	40	54	189	120	1288	2024
TGME49_253340	3	0	5	16	44	38	86	188
TGME49_253350	37	40	24	47	57	36	94	158
TGME49_253360	428	410	178	371	575	462	1276	1866
TGME49_253370	1141	1047	307	540	1020	815	3193	4202
TGME49_253380	1775	1603	501	942	1489	1173	4151	5477
TGME49_253390	0	0	0	0	2	1	45	24
TGME49_253400	745	785	172	324	660	514	2087	2756
TGME49_253410	302	274	88	158	421	267	808	1381
TGME49_253420	315	288	142	261	378	276	875	1257
TGME49_253430	7085	5560	2380	4278	6227	4905	22262	29639
TGME49_253440	2543	2380	783	1540	1880	1364	7424	9956
TGME49_253460	2	0	19	36	41	48	220	303
TGME49_253470	824	766	306	536	1188	735	2760	3813
TGME49_253480	70	57	104	176	317	183	785	942
TGME49_253490	596	587	175	349	533	417	2208	2781
TGME49_253500	0	0	0	0	3	1	8	9
TGME49_253505	0	0	0	0	0	0	1	0
TGME49_253510	307	237	116	201	379	280	1122	1543
TGME49_253520	178	190	85	165	197	160	495	683
TGME49_253530	134	141	41	93	249	141	359	645
TGME49_253540	176	167	51	114	131	112	311	433
TGME49_253550	1	0	2	5	7	4	33	31
TGME49_253560	351	295	90	202	357	265	1620	2076
TGME49_253570	215	187	82	110	315	209	936	1317
TGME49_253580	24	24	18	29	92	60	294	364
TGME49_253600	386	418	121	238	744	516	1754	2392
TGME49_253615	332	412	128	237	309	215	880	1281
TGME49_253640	910	660	268	428	1156	915	4080	5332
TGME49_253650	1272	1154	536	1033	1494	1154	4121	5944
TGME49_253660	0	1	0	0	0	2	8	6
TGME49_253670	0	0	7	1	9	18	26	41
TGME49_253680	109	118	43	87	247	149	778	1073
TGME49_253690	2766	1720	634	1050	2083	1477	5778	8030
TGME49_253700	1665	1590	575	1014	1531	1224	5169	6835
TGME49_253710	52	27	25	44	109	100	359	548
TGME49_253730	604	513	293	542	608	476	1217	1844
TGME49_253740	342	291	105	204	424	291	1017	1450
TGME49_253750	889	883	315	691	744	529	2550	3227
TGME49_253755	12	10	10	11	33	28	89	118
TGME49_253760	26	32	6	18	35	29	89	152
TGME49_253770	21	6	2	19	36	24	74	117
TGME49_253780	478	382	223	393	554	384	1119	1834
TGME49_253790	35	29	62	85	151	52	348	573
TGME49_253800	169	168	66	148	233	164	586	876
TGME49_253810	312	344	120	221	377	222	1083	1418
TGME49_253820	2032	1936	744	1381	3020	1921	7579	10739
TGME49_253830	157	133	103	166	264	187	844	1221
TGME49_253840	0	0	0	0	1	0	2	0
TGME49_253850	109	103	36	79	125	85	266	416
TGME49_253860	598	640	158	315	445	329	1536	2121
TGME49_253870	112	95	52	91	96	58	310	378
TGME49_253880	601	599	222	380	574	450	1806	2451
TGME49_253890	569	519	262	547	668	594	2896	3535
TGME49_253900	1005	1112	230	631	676	532	2799	3634
TGME49_253910	241	209	60	106	287	226	835	1087
TGME49_253920	9	6	3	9	16	5	70	100
TGME49_253925	4	0	1	1	2	1	20	18
TGME49_253930	154	150	77	92	225	183	979	1230
TGME49_253940	722	543	194	344	522	453	2826	3113
TGME49_253950	311	300	108	171	312	230	1320	1852
TGME49_253960	109	70	32	48	93	103	424	520
TGME49_253970	95	121	32	58	103	62	228	362
TGME49_253990	413	401	150	303	473	334	1262	1689
TGME49_254000	915	934	269	485	711	608	3257	3894
TGME49_254010	590	662	184	365	578	409	2083	2734
TGME49_254020	3	0	4	6	11	7	25	41
TGME49_254030	1002	696	440	720	1470	1026	3075	4863
TGME49_254040	18	31	44	44	137	122	280	471
TGME49_254050	376	377	153	316	596	396	1500	2256
TGME49_254060	25	13	13	22	52	51	66	150
TGME49_254070	1226	936	451	729	1913	1494	5707	8153
TGME49_254080	1042	807	219	426	905	746	3369	4397
TGME49_254090	617	587	215	429	525	380	2008	2467
TGME49_254100	0	0	0	0	0	0	0	0
TGME49_254110	282	241	114	169	342	250	698	947
TGME49_254120	1822	1585	788	1386	3158	2087	8956	13419
TGME49_254135	114	102	46	102	107	107	577	678
TGME49_254140	88	53	30	28	68	37	160	246
TGME49_254150	181	186	39	74	169	112	690	925
TGME49_254160	4	10	11	4	30	15	118	156
TGME49_254180	0	1	1	3	2	2	3	5
TGME49_254190	0	0	2	2	0	5	9	10
TGME49_254200	125	120	64	114	141	138	437	575
TGME49_254210	113	127	39	75	100	107	402	527
TGME49_254220	182	140	65	110	119	67	554	815
TGME49_254230	194	188	67	153	195	152	844	941
TGME49_254250	66	93	25	41	48	20	235	246
TGME49_254255	12	24	5	22	13	10	81	79
TGME49_254260	178	185	80	142	237	167	622	940
TGME49_254270	134	109	34	53	131	131	345	432
TGME49_254280	121	193	60	73	184	121	557	820
TGME49_254290	181	201	77	132	276	210	633	1013
TGME49_254300	760	617	300	621	647	503	1619	2441
TGME49_254310	0	0	2	0	0	0	1	2
TGME49_254320	1	3	6	6	23	11	35	71
TGME49_254330	10	4	2	8	16	3	95	99
TGME49_254335	39	20	0	6	29	17	58	122
TGME49_254340	69	57	25	23	74	52	148	214
TGME49_254350	0	1	1	1	12	10	28	34
TGME49_254360	1	0	0	0	3	0	1	1
TGME49_254365	1006	795	476	841	1429	950	2594	4010
TGME49_254370	1363	1307	433	795	1399	943	4168	5153
TGME49_254380	165	142	91	190	219	153	770	1108
TGME49_254390	638	669	252	447	816	567	3022	3764
TGME49_254400	193	212	71	141	186	119	536	758
TGME49_254410	521	510	188	340	484	394	2484	2869
TGME49_254420	353	275	97	179	291	244	1602	1819
TGME49_254430	2	6	22	41	61	55	251	274
TGME49_254440	5479	4881	2467	4014	7255	4995	15506	24755
TGME49_254450	70	44	22	71	99	59	392	444
TGME49_254460	604	555	182	416	912	644	2328	3257
TGME49_254470	4012	3430	1135	2094	4544	3412	13746	18606
TGME49_254480	241	263	126	224	343	250	633	1006
TGME49_254485	2	4	0	4	4	1	25	36
TGME49_254490	311	413	113	243	277	254	874	1128
TGME49_254500	101	85	38	59	105	90	331	411
TGME49_254510	165	200	75	153	269	166	347	650
TGME49_254520	648	536	348	550	737	501	1290	2266
TGME49_254530	86	81	37	87	110	65	409	472
TGME49_254540	185	140	42	78	136	106	484	633
TGME49_254555	489	478	172	275	402	347	1682	2073
TGME49_254570	919	1006	360	621	882	547	2113	3171
TGME49_254580	635	580	264	422	700	509	1653	2292
TGME49_254590	41	33	39	29	178	103	392	607
TGME49_254600	71	39	49	54	92	60	246	309
TGME49_254603	106	97	76	121	231	182	484	712
TGME49_254606	298	344	158	233	365	213	642	999
TGME49_254610	291	158	141	267	382	263	806	1170
TGME49_254620	4748	3991	1451	2759	7333	4321	12784	19753
TGME49_254625	2	0	8	4	5	15	45	80
TGME49_254630	607	444	322	542	648	507	1795	2663
TGME49_254635	10	14	11	8	48	37	110	187
TGME49_254640	35	23	1	14	84	44	199	226
TGME49_254650	283	277	129	174	412	326	1089	1685
TGME49_254660	342	213	198	284	609	401	1468	2381
TGME49_254670	1	0	1	3	2	1	21	19
TGME49_254680	0	0	1	2	2	0	18	20
TGME49_254690	1079	889	610	1131	1718	1229	4376	6080
TGME49_254700	48	52	16	17	71	33	157	260
[truncated: 6,921 more rows]

## Sheet: CPSF30-mAID_ExonTPM
Geneid	Chr	Start	End	ExonLength	UT-1	UT-2	7h-1	7h-2	24h-1	24h-2	48h-1	48h-2
TGME49_238000	VI	4007	9291	2277	65.3387	72.9633	67.7183	82.8835	71.3791	73.666	82.4334	85.5465
TGME49_238010	VI	8155	12489	2438	1187.35	1134.75	1520.43	1450.64	1566	1402.1	1039.41	1204.53
TGME49_238020	VI	14288	16938	2136	30.0602	32.8166	13.6007	33.4356	19.4275	24.909	30.3507	24.3843
TGME49_238030	VI	17309	18401	1093	17.8078	13.3261	7.15596	20.1051	10.7571	9.47948	14.0247	15.7154
TGME49_238040	VI	19373	28819	4491	24.5095	21.3852	22.3918	33.6761	24.9481	24.8167	32.7817	26.3246
TGME49_238050	VI	30696	41791	5142	93.8925	105.073	105.825	102.881	76.499	74.5546	100.458	98.3836
TGME49_238060	VI	42742	45232	2491	0.359251	0.182726	2.69133	2.0757	4.30352	4.72149	11.2499	9.30198
TGME49_238070	VI	46646	49118	717	102.033	103.477	125.449	125.749	102.248	89.0469	115.026	103.414
TGME49_238073	VI	49240	50697	771	107.074	74.6811	118.112	117.78	67.5023	77.7253	76.2144	63.3736
TGME49_238077	VI	55531	56307	369	13.3385	8.63468	12.1122	8.75774	6.56006	3.79443	17.5256	12.0129
TGME49_238080	VI	56561	59819	2765	20.5518	26.9152	21.8217	23.6088	25.2634	22.2808	22.1469	21.9707
TGME49_238100	VI	63721	67061	1604	158.866	141.177	191.218	185.555	169.994	158.869	122.595	133.091
TGME49_238110	VI	69657	72127	1269	229.718	245.34	404.589	347.862	242.938	254.652	181.698	181.681
TGME49_238130	VI	71745	77794	5249	50.5072	67.9851	78.9746	74.8029	61.0057	61.0313	76.5685	70.1507
TGME49_238140	VI	77431	87468	4266	99.3802	104.883	97.9582	90.6001	70.5642	70.9591	74.7108	66.6789
TGME49_238150	VI	87488	90142	2655	198.781	165.096	167.498	168.214	298.594	295.955	301.914	302.176
TGME49_238160	VI	90916	93227	2312	0.387065	0	1.44985	1.6773	11.7414	7.26719	7.70071	9.47748
TGME49_238165	VI	92684	94664	809	1.10617	0	0	0	5.98433	1.73071	1.87507	3.79815
TGME49_238170	VI	95473	102588	5888	24.8877	21.3361	12.3349	18.2766	17.0027	19.214	20.5156	20.5065
TGME49_238180	VI	104903	111578	2702	110.868	115.561	144.321	135.627	121.839	122.085	99.3995	104.734
TGME49_238190	VI	111801	119047	3187	38.6093	41.7038	43.8246	52.9306	35.7528	38.6611	40.4079	39.4822
TGME49_238200	VI	120831	131111	3796	0.235747	0.59954	3.67937	1.78777	1.82197	1.84424	2.75523	1.95066
TGME49_238210	VI	132067	134893	2827	2.21587	2.57613	5.5334	3.88662	8.8073	6.24048	21.0399	25.7296
TGME49_238220	VI	136012	138532	2521	1.4199	2.52772	6.20505	3.0765	5.07534	5.10961	8.10738	6.63371
TGME49_238230	VI	139873	148072	2938	34.3429	33.8512	46.2077	52.4669	34.8987	32.8829	36.3051	34.4616
TGME49_238240	VI	148524	155107	2457	204.784	228.141	216.467	184.532	188.316	159.219	110.481	136.089
TGME49_238250	VI	154518	156951	1581	1791.63	2036.9	1711.72	1791.39	2055.5	1861.55	1458.86	1756.72
TGME49_238260	VI	157331	159294	1224	21.0198	17.8498	11.8673	22.7057	16.3864	15.3284	36.1361	23.828
TGME49_238270	VI	159530	164346	4373	3.06961	2.02969	7.92086	9.75468	3.51898	5.37902	6.93773	5.93224
TGME49_238380	VI	170422	178314	4970	167.23	174.879	91.1642	108.977	140.376	134.662	125.332	129.032
TGME49_238390	VI	178956	190195	9675	45.6465	56.9728	35.8592	33.7356	26.5924	29.9277	52.8215	42.7292
TGME49_238400	VI	193287	208192	9842	28.5735	33.8534	23.1031	22.6232	16.5491	19.7176	20.4261	18.896
TGME49_238410	VI	209379	217478	6598	16.7843	23.2483	20.999	17.6813	25.9959	24.701	15.9847	18.5823
TGME49_238420	VI	223511	232979	7586	17.636	20.5805	13.8454	10.6925	14.063	13.8796	13.9028	13.2538
TGME49_238440	VI	233136	235299	1666	3.76006	3.82496	16.767	11.2505	16.3979	11.934	16.1498	15.6922
TGME49_238450	VI	236646	237541	896	0	0	1.24704	0	0	1.87519	0.980163	1.1806
TGME49_238460	VI	237642	238848	1207	0.37071	0.754218	0	0.535477	0.859509	0.464008	0.132293	0.375601
TGME49_238470	VI	241963	242612	650	0	0.700263	0	0	0	5.16977	0	0
TGME49_238480	VI	244893	245911	899	0	0	0	0	1.15398	0	0.621658	0.896503
TGME49_238490	VI	247878	248958	1081	16.1429	13.4741	24.8071	16.1431	24.3122	12.9523	7.53335	10.8573
TGME49_238500	VI	252881	253435	555	0	0	0	0	0	0	0.287707	0.181522
TGME49_238505	VI	256305	257065	711	1.88796	2.56074	0	2.27258	1.45911	0.787705	1.12291	1.70033
TGME49_238510	VI	258083	262289	3886	19.4592	29.6341	25.3029	22.2869	19.1325	18.6638	15.6965	16.3327
TGME49_238530	VI	267451	268678	585	0	0	1.91	1.10482	4.13789	2.87209	1.09181	1.3777
TGME49_238850	VI	270173	270912	740	0	0.615096	0	2.62022	0.934619	0	0	0.408424
TGME49_238860	VI	273595	274369	775	0	0	0	0	0.446205	0	0	0
TGME49_238870	VI	274926	279696	3828	27.2349	26.7538	31.2321	26.3391	21.2743	24.5794	23.7347	22.8833
TGME49_238880	VI	281594	297566	10742	13.7875	16.3136	18.8271	18.291	13.1988	11.1052	7.16482	8.42663
TGME49_238895	VI	298258	305159	5676	53.763	51.2829	49.4107	47.3696	59.8891	56.8347	52.2553	55.5284
TGME49_238915	VI	308254	313261	3537	0.126505	0.128688	1.26362	1.82731	1.9065	1.58343	4.04047	2.7771
TGME49_238930	VI	314189	320086	4776	2.67007	5.43231	4.67903	3.92448	4.99598	3.34206	5.01499	5.11527
TGME49_238940	VI	322455	329403	1107	27.0813	28.3711	24.7291	26.8571	24.8345	24.0314	16.2995	17.8373
TGME49_238950	VI	331393	344238	6552	132.179	140.4	114.259	120.495	82.5994	94.6252	91.4879	93.3101
TGME49_238960	VI	345500	347856	1021	7.23102	4.45809	2.18874	2.2156	11.8544	8.77662	5.86474	8.78184
TGME49_238970	VI	352813	365019	7602	0.294296	0.419126	0.293963	0.25506	0.682338	0.699889	1.02923	1.04694
TGME49_238980	VI	369523	374193	4485	0.299296	0.101487	0.498262	0.720537	0.23131	0.312184	2.01154	1.04451
TGME49_238995	VI	377866	390604	8422	13.7602	13.9437	13.0017	12.0869	9.7518	11.3049	11.1767	11.0171
TGME49_239010	VI	390728	395331	4604	85.5242	62.6799	64.1919	64.2952	56.8211	52.916	64.9947	56.6524
TGME49_239020	VI	397579	423138	5019	127.842	122.839	116.433	112.485	136.56	136.583	136.787	134.426
TGME49_239030	VI	428151	428223	73	0	0	0	0	0	0	4.37472	0
TGME49_239040	VI	428766	428838	73	6.12941	0	0	8.85372	18.9484	7.67203	4.37472	4.14018
TGME49_239050	VI	429911	443782	5447	30.2296	41.1968	25.1286	28.1216	22.7598	18.7646	29.5493	27.9281
TGME49_239070	VI	443366	449514	4134	20.0778	24.7734	33.9206	31.1122	27.2281	28.5855	31.6728	28.4517
TGME49_239080	VI	450148	453350	2553	12.0055	23.2667	14.0052	19.2403	13.4775	13.6011	15.3861	16.4751
TGME49_239083	VI	453679	455337	459	17.0595	17.8498	25.5603	18.3054	27.499	18.3026	20.1771	20.522
TGME49_239087	VI	455435	458235	2457	41.2482	35.1058	40.0191	38.5373	39.4788	36.9269	42.6651	42.1511
TGME49_239090	VI	457702	459578	1877	38.1415	46.8023	30.0619	40.804	52.8754	46.2488	62.1015	66.0448
TGME49_239100	VI	462284	466050	2050	2599.56	2573.38	3049.01	3065.45	3261.82	3110.92	2364.86	2770.89
TGME49_239110	VI	466978	469345	726	0	0	13.8515	20.0306	2.61977	8.10002	4.72874	4.23238
TGME49_239120	VI	469731	474619	2148	0.416617	0.211904	20.8073	17.3014	5.79568	4.04139	4.68328	4.92466
TGME49_239130	VI	475718	483196	6876	7.6787	11.3859	8.28751	10.8566	7.94616	6.76045	9.41669	9.48692
TGME49_239250	VI	483498	494938	7995	84.6484	98.5207	80.7792	98.464	71.9949	71.4171	57.4299	63.1055
TGME49_239260	VI	496841	498681	1841	11.1801	11.6203	9.71083	12.2875	18.0324	14.6023	20.8595	20.3568
TGME49_239270	VI	500686	516362	6691	97.7014	95.6124	109.548	113.5	87.4471	94.5846	87.893	83.8433
TGME49_239290	VI	518606	528449	5914	10.0626	17.7019	11.7139	13.1144	9.82345	10.1329	11.367	10.238
TGME49_239300	VI	529288	539647	7349	17.9612	15.608	11.2511	10.0699	15.7165	16.5373	20.913	16.5531
TGME49_239310	VI	541103	545358	1810	62.2965	55.5761	70.992	74.2734	84.0641	66.3715	63.7827	64.9551
TGME49_239320	VI	546249	548568	905	44.7447	34.7036	50.6204	47.4921	35.5362	36.5121	27.6127	28.6092
TGME49_239330	VI	551410	555189	1829	2099.75	2590.29	2141.23	2106.99	2269.31	2055.89	1424.83	1774.57
TGME49_239340	VI	556752	567334	6346	16.781	24.6736	18.4875	15.328	13.2144	13.3263	16.4433	16.55
TGME49_239350	VI	568535	582103	8708	5.44664	7.05651	6.28735	7.68193	5.51992	4.08403	6.37206	5.47222
TGME49_239365	VI	583589	591091	5124	0.0873238	0.266493	0.436125	0.693748	0.944833	0.874408	2.00999	1.27798
TGME49_239885	VI	592227	614931	19778	5.29389	7.11132	6.49689	5.5554	4.89567	4.24758	7.92413	6.25769
TGME49_239400	VI	615088	624627	6840	58.0569	59.4583	48.1899	48.0016	58.3679	49.1689	66.4039	61.9932
TGME49_239410	VI	624935	639030	10148	56.1293	78.9866	52.08	66.874	41.7268	43.5441	68.8479	58.1753
TGME49_239420	VI	641588	656613	11991	109.707	113.555	79.0188	86.699	65.1474	77.4862	137.299	112.049
TGME49_239430	VI	655715	658680	2681	0	0.169776	2.5006	6.26794	2.96666	6.05807	8.87428	6.78268
TGME49_239440	VI	658988	668354	5823	48.5637	61.5962	58.1414	59.3266	50.063	53.1396	69.4595	63.2616
TGME49_239450	VI	669147	669220	74	0	0	0	0	2.33655	0	4.31561	1.36141
TGME49_239475	VI	669282	687315	8561	1.41117	2.07355	3.78498	3.35957	3.47384	2.78034	4.77484	4.63064
TGME49_239480	VI	687754	710143	5497	25.1521	24.5926	22.156	28.3361	16.6708	18.5939	18.6634	19.1427
TGME49_239490	VI	710263	718256	3888	133.843	123.275	162.947	168.396	153.07	136.197	134.358	145.092
TGME49_239500	VI	720751	724842	1920	238.405	266.109	356.447	342.685	253.503	242.692	194.316	220.877
TGME49_239510	VI	726948	729585	1026	2.18054	3.54909	4.35615	1.25989	11.9651	9.27972	7.31466	10.752
TGME49_239520	VI	731120	737729	5079	0	0.0896182	0.219994	0.254507	2.41705	2.42593	0.958882	1.0612
TGME49_239530	VI	738084	742632	3066	56.5511	68.2162	55.0294	50.1711	51.7134	46.8542	33.6958	35.8323
TGME49_239540	VI	744985	752123	4587	52.8216	50.558	34.3463	39.805	40.1823	44.5653	60.9886	45.167
TGME49_239550	VI	754303	757021	1394	0.962942	0.653043	0.801544	0.463645	0.496139	0	2.9782	2.27651
TGME49_239560	VI	757424	770907	5027	9.25691	10.7749	10.669	7.45706	12.5198	12.8679	13.2932	11.1727
TGME49_239570	VI	771349	773658	2310	0	0	0	0	0.748504	0	0.138249	0.479736
TGME49_239580	VI	773690	782234	8545	0.0523636	0	0.261522	0.0378187	0.70821	0.458795	0.22424	0.306537
TGME49_239590	VI	781878	791741	5097	25.1947	27.6835	39.1303	35.5686	24.2548	27.47	22.133	21.2874
TGME49_239600	VI	793967	797320	3354	19.0772	19.4065	17.1567	15.8015	45.3655	41.5786	45.918	48.9305
TGME49_239610	VI	798369	802647	4279	19.3451	20.4236	25.068	27.7923	22.2242	22.5777	23.6027	24.003
TGME49_239620	VI	803644	813401	6088	25.6503	24.8221	10.2779	12.7396	14.7969	12.9251	29.5592	21.3635
TGME49_239630	VI	813637	818656	2763	37.8136	45.4677	32.7562	41.1699	44.8062	48.4451	50.2207	48.5127
TGME49_239640	VI	818807	819973	995	0.449695	0.457458	3.3689	6.49569	5.03943	6.1916	7.22159	7.79631
TGME49_239650	VI	820099	821741	1470	0	0.30964	0	2.85788	0.235244	0	2.22679	1.61054
TGME49_239660	VI	821869	823074	897	0.498826	0.507437	4.98262	1.80134	0.771035	1.8731	1.69112	3.76247
TGME49_239670	VI	823140	827802	4062	4.29602	3.36167	8.25223	6.52368	4.1715	5.5151	5.40513	4.4147
TGME49_239680	VI	827674	832385	2693	52.3378	60.0866	57.6725	62.4001	50.1442	42.6335	60.6276	51.906
TGME49_239690	VI	833126	835506	766	72.7247	84.676	88.2504	78.4698	66.3628	74.9425	78.2753	60.2363
TGME49_239700	VI	838552	861056	10442	18.8543	24.1927	10.7006	12.9054	12.3692	12.6311	18.3502	15.5767
TGME49_239710	VI	862097	867883	1772	59.7185	63.1896	104.673	83.5257	82.5492	70.3233	59.4285	68.7644
TGME49_239720	VI	869026	873684	1475	65.8278	65.884	79.1615	69.8903	66.8173	61.8912	76.9158	69.4625
TGME49_239730	VI	874554	882020	3212	0.696524	0.708547	4.52228	5.93601	5.32925	8.28231	20.8297	17.1567
TGME49_239740	VI	882304	885348	3045	759.19	729.245	477.397	512.6	701.214	724.121	887.56	832.589
TGME49_239748	VI	884668	890734	4325	28.9677	22.7322	20.797	20.4731	33.0218	32.8913	63.3541	56.1374
TGME49_239752	VI	892105	896052	3509	151.359	167.203	137.241	153.246	157.531	159.686	131.624	137.623
TGME49_239755	VI	896795	899294	2186	0	0	1.02228	0.73916	1.74012	3.58683	4.38273	3.57168
TGME49_239760	VI	901427	903241	402	4650.89	4311.67	4683.43	4568.46	5645.63	4669.24	4292.62	4918.31
TGME49_239770	VI	904517	906049	1043	346.203	293.701	227.648	212.858	387.087	366.75	302.361	309.429
TGME49_239780	VI	906138	910811	2597	92.1772	69.2308	41.734	46.1658	68.0433	59.0897	83.4663	71.7664
TGME49_239790	VI	911480	917995	3150	94.6741	104.617	118.829	99.1026	87.3854	81.4307	77.9885	79.6521
TGME49_239795	VI	918176	922934	4559	69.4873	60.4032	57.8405	53.5884	86.6988	100.12	117.245	99.4296
TGME49_239800	VI	922517	928010	3019	115.752	96.8689	92.1566	95.2676	164.829	172.062	159.704	152.268
TGME49_239810	VI	929765	937360	7308	20.0825	20.0243	25.3805	20.9161	17.6264	22.0329	27.5852	25.641
TGME49_239820	VI	937950	949204	4280	381.062	360.574	341.471	325.577	299.553	331.324	300.253	308.318
TGME49_239830	VI	950752	962233	7896	58.8776	56.2911	42.7356	47.6392	56.5618	65.2905	51.6889	52.5795
TGME49_239855	VI	968350	972814	3644	2.33301	3.12274	4.90605	4.52283	7.44951	8.76052	11.6778	10.2984
TGME49_239870	VI	973820	983472	4684	38.8794	41.1539	34.3507	38.0148	36.0648	28.9953	43.2772	37.0909
TGME49_239880	VI	985091	989944	4239	3.48331	1.71803	1.31794	2.89693	4.20127	3.69937	4.82159	4.57497
TGME49_239890	VI	991332	995537	1894	289.045	276.851	232.143	253.034	313.766	308.416	315.266	315.159
TGME49_239910	VI	995718	1013015	11275	88.5568	90.8727	58.5185	61.7946	74.3604	78.3585	79.3643	74.1176
TGME49_239930	VI	1012521	1022709	3812	29.1686	30.8064	26.9665	24.076	24.1304	19.6873	29.0284	25.794
TGME49_240050	VI	1022671	1034821	9147	17.7325	22.8406	17.346	19.3253	16.143	17.4195	21.2624	20.0949
TGME49_240060	VI	1035029	1038680	3652	369.769	338.262	188.775	195.56	253.391	239.39	452.623	397.199
TGME49_240070	VI	1039078	1044974	4573	47.3082	52.4546	58.6408	56.1097	41.6665	45.3141	47.5925	44.8316
TGME49_240080	VI	1045796	1053271	3752	39.9506	44.037	26.5044	23.8581	27.1431	29.8538	32.2164	29.979
TGME49_240090	VI	1057697	1061687	3255	393.767	448.319	247.843	276.598	271.92	252.413	359.017	349.836
TGME49_240200	VI	1062062	1066051	2700	9.36324	10.8735	18.0018	15.0808	16.1378	11.5123	13.6909	12.7796
TGME49_240210	VI	1065582	1073634	5318	19.6042	22.8955	21.8512	24.1854	16.8743	14.0594	21.4685	19.2661
TGME49_240220	VI	1073931	1085426	6604	18.6323	24.1577	20.7262	22.7054	16.128	13.5689	24.2756	22.0131
TGME49_240230	VI	1088617	1091777	783	0.285726	0	11.4161	2.88905	2.42905	6.79509	4.48647	2.63763
TGME49_240240	VI	1094139	1102610	3048	11.2302	9.48272	6.96512	8.37588	6.01308	5.788	6.05077	6.70969
TGME49_240243	VI	1103232	1108566	1871	15.1859	15.3264	14.6313	15.8903	11.3668	10.7761	15.4898	11.7113
TGME49_240247	VI	1109597	1112425	939	19.5371	19.632	16.0642	23.7466	22.2806	18.4897	26.868	25.2666
TGME49_240250	VI	1112441	1117722	3042	133.852	158.532	107.254	113.244	141.643	130.257	136.109	142.754
TGME49_240255	VI	1118053	1120774	2602	13.929	13.9945	25.7652	19.8715	15.5494	14.6364	22.0308	17.4425
TGME49_240260	VI	1121377	1125468	491	0	0	0	0	0	0	1.78865	0.615547
TGME49_240270	VI	1129253	1130626	781	33.802	34.9683	34.336	32.2747	22.5816	25.4572	27.4989	28.7657
TGME49_240280	VI	1132629	1142418	3710	105.048	117.473	116.855	128.829	89.8078	96.01	83.7338	89.7875
TGME49_240285	VI	1143917	1146465	2010	0	0.226453	0.555896	1.60776	1.89249	1.25386	3.97208	3.63382
TGME49_240290	VI	1148017	1150648	1028	1.52341	1.32832	0	1.57179	2.35473	4.35843	5.82481	4.26302
TGME49_240295	VI	1151133	1152887	1050	1.70456	0	3.19243	0.615544	2.96408	0	1.82488	3.40612
TGME49_240300	VI	1154871	1161321	5516	15.2907	18.1128	8.50776	11.4829	13.228	12.6409	15.3135	14.8395
TGME49_240310	VI	1161639	1166228	4590	1.07231	0.198331	1.21716	0.563243	0.753397	0.976136	1.40892	1.38277
TGME49_240325	VI	1169098	1173565	4404	0.1016	0	0.253713	0.146758	0.314086	0.445096	0.199415	0.320259
TGME49_240330	VI	1177241	1182660	5420	0	0	0	0.357742	0	0.464993	0.117843	0.130113
TGME49_240340	VI	1186953	1191647	4695	0.0953029	0	0	0.275323	0.441928	1.55075	0.425126	0.257494
TGME49_240350	VI	1194041	1198559	4519	0	0	0	0	0.22957	0	0.0353347	0.133761
TGME49_240360	VI	1202660	1204352	1693	0	0	0	0	0.204258	0	0.188633	0.386792
TGME49_240365	VI	1205502	1207154	1480	0.604658	0.307548	0	0	0.467309	1.70288	0.161835	1.12316
TGME49_240370	VI	1207102	1213084	5983	0.82265	0.608619	0.373509	0.324079	0.982576	0.514845	0.880721	1.11134
TGME49_240380	VI	1217423	1243413	15110	34.4987	35.0491	29.3203	27.3756	27.5663	24.9265	24.6491	24.6727
TGME49_240390	VI	1244456	1254201	6687	0.133826	0.408408	0.584826	0.531594	1.57727	1.21442	1.38497	1.46137
TGME49_240400	VI	1258323	1260539	2217	9.88945	14.3717	10.0799	12.5358	16.222	13.3889	9.07504	9.86087
TGME49_240410	VI	1261015	1271818	8494	16.2775	16.7192	17.3641	20.1642	10.117	8.90133	8.76966	8.02374
TGME49_240430	VI	1272960	1281011	5282	11.6055	10.9441	14.1732	15.2954	9.75493	14.6854	10.49	11.0529
TGME49_240440	VI	1281130	1283845	1926	51.1102	42.5393	56.8538	44.1284	46.5029	53.0689	41.3702	47.6784
TGME49_240450	VI	1284409	1286360	1952	46.0742	41.5063	40.069	42.0506	35.8741	53.5097	26.3402	27.7151
TGME49_240460	VI	1288027	1289221	381	85.7313	102.145	58.6536	62.7661	97.117	72.7635	81.7247	101.406
TGME49_240470	VI	1289316	1291836	1476	3.94093	4.62572	9.84118	8.97668	18.8602	18.7824	32.5089	29.3838
TGME49_240480	VI	1291886	1294519	1893	50.3467	25.127	34.2348	47.9705	45.0301	53.8461	40.8683	38.2116
TGME49_240490	VI	1294715	1295146	432	144.488	176.484	106.045	134.65	154.894	134.181	148.034	132.81
TGME49_240500	VI	1296205	1298437	1566	37.8587	27.7579	72.7777	73.6707	67.1302	70.6331	51.3395	52.077
TGME49_240510	VI	1299219	1303679	4461	22.1667	21.9372	33.0622	42.8852	23.4105	30.5075	35.0961	30.2166
TGME49_240520	VI	1303849	1306857	2856	128.155	107.099	122.064	125.938	93.1117	109.031	112.965	111.68
TGME49_240525	VI	1305516	1308904	1931	97.9008	87.3334	108.205	104.764	79.0651	88.8958	89.2655	87.1014
TGME49_240530	VI	1311443	1312887	976	99.7128	55.7304	92.7311	113.901	84.5035	89.2306	110.351	88.7707
TGME49_240540	VI	1311712	1317866	3928	84.295	69.643	82.7773	90.6627	78.2208	87.117	109.433	97.577
TGME49_240550	VI	1317956	1318912	957	59.1453	60.1662	79.9776	99.2782	71.5467	76.079	68.5762	69.7948
TGME49_240560	VI	1317966	1321567	2553	126.19	110.004	102.413	97.214	175.817	175.279	129.124	134.642
TGME49_240570	VI	1321385	1325917	3759	93.6199	78.1019	54.6935	49.7765	106.162	103.102	102.905	91.3106
TGME49_240575	VI	1325472	1327311	1291	49.0424	36.8438	42.8419	20.0254	59.1974	54.8779	37.6003	36.755
TGME49_240580	VI	1328807	1330650	1378	4.2212	5.285	18.6496	8.44251	7.0266	10.5671	13.6155	14.6584
TGME49_240590	VI	1332210	1335198	1629	233.2	195.592	313.462	281.104	302.397	308.049	268.482	277.836
TGME49_240600	VI	1335366	1339649	2708	349.382	291.037	404.359	404.547	341.084	386.436	273.716	287.166
TGME49_240610	VI	1338721	1340524	1284	263.276	207.556	315.887	302.774	272.957	332.589	201.711	205.726
TGME49_240620	VI	1340658	1341371	360	1.86436	1.26436	6.20751	7.18135	18.251	24.8915	23.7298	23.9268
TGME49_240630	VI	1342968	1347417	2609	160.011	147.944	158.888	154.087	175.688	199.852	179.415	198.902
TGME49_240640	VI	1348592	1354689	3007	299.389	302.135	284.261	323.698	253.233	253.954	311.629	273.035
TGME49_240650	VI	1355575	1373990	6016	77.3512	83.4152	79.6782	89.0088	55.1823	56.3689	62.6527	54.969
TGME49_240660	VI	1375880	1380907	1740	45.259	43.1627	58.4362	52.7458	63.2989	46.5106	49.5092	47.7378
TGME49_240670	VI	1381029	1383603	2101	45.3623	39.1044	56.3728	41.9909	58.595	59.9777	57.4185	55.4071
TGME49_240680	VI	1382224	1383915	1280	39.1516	32.5376	54.9947	37.113	60.5166	58.8499	46.3439	49.5852
TGME49_240690	VI	1387666	1392264	3438	188.714	197.731	225.875	238.658	253.121	241.421	228.044	225.899
TGME49_240700	VI	1391273	1399765	4066	39.7816	47.4649	44.6556	49.3563	44.0128	38.6366	53.7232	46.8043
TGME49_240710	VI	1402036	1415549	2790	58.0558	73.9856	53.0642	56.8716	48.7727	45.4671	58.1478	59.2009
TGME49_240730	VI	1418535	1421982	2966	31.9066	31.4599	30.1376	28.4373	30.6634	41.5417	32.0862	30.7057
TGME49_240740	VI	1423187	1436704	2401	43.7011	56.8726	47.933	44.4161	32.9822	34.1726	36.5775	36.106
TGME49_240755	VI	1437580	1438194	300	169.284	207.103	195.537	169.121	136.595	127.88	91.8145	101.08
TGME49_240770	VI	1439012	1441266	1596	41.072	47.9127	54.9575	53.6576	47.4512	40.5305	40.1695	43.6181
TGME49_240780	VI	1442185	1444523	1626	34.9482	39.4705	32.2974	35.7742	48.1708	35.1328	60.9347	47.9249
TGME49_240790	VI	1445370	1446964	294	0.760964	3.0964	7.60103	4.39674	11.7622	1.90496	6.51745	7.88137
TGME49_240800	VI	1448907	1454606	2971	131.93	165.308	159.837	170.336	140.605	146.754	106.255	121.293
TGME49_240810	VI	1456927	1460342	3416	130.462	126.718	141.632	165.364	116.518	113.782	100.78	108.176
TGME49_240820	VI	1461285	1461746	462	36.3188	32.0196	21.7666	25.1813	16.0928	33.9429	21.0829	20.6068
TGME49_240830	VI	1461807	1463600	1794	21.9483	24.357	19.6191	21.6161	12.9148	22.1651	18.5578	17.1277
TGME49_240840	VI	1464470	1473536	3467	31.9421	21.6623	33.3562	36.2589	23.689	24.1502	18.5147	18.7134
TGME49_240850	VI	1474307	1480772	2882	24.0646	23.7693	24.2313	27.3599	20.8781	17.2953	25.0708	23.8403
TGME49_240860	VI	1480524	1485397	2071	87.0696	88.5726	68.2496	65.069	89.3326	77.7483	73.4007	70.9492
TGME49_240870	VI	1485583	1500282	3992	58.4528	61.2861	76.2721	70.1045	56.1766	56.6792	60.219	56.8076
TGME49_240880	VI	1504116	1513285	7836	17.1304	18.4136	22.9573	26.5589	26.6991	26.5878	44.8201	39.3927
TGME49_240890	VI	1522757	1538571	6709	39.9828	46.5755	36.64	49.4206	33.1944	34.7689	39.0923	37.6234
TGME49_240900	VI	1539090	1549848	9985	11.1358	13.7668	10.6308	10.5509	14.1995	11.6387	23.116	18.4942
TGME49_240910	VI	1551220	1576517	7282	17.512	21.6584	19.9472	17.9731	20.6336	18.8814	23.3749	21.7205
TGME49_240920	VI	1575777	1576343	567	10.6535	11.6402	1.97064	5.69948	5.18409	7.90206	15.2074	11.1938
TGME49_240930	VI	1577523	1579638	2116	1.69167	1.29065	5.28049	7.33068	9.4787	8.07267	16.7148	19.4966
TGME49_240940	VI	1579941	1580916	976	12.8366	11.4259	20.0345	16.2243	21.6131	18.0756	37.7925	25.6506
TGME49_240950	VI	1580089	1582964	2876	15.8691	21.6823	18.2599	15.5063	20.5008	26.484	31.7856	26.6048
TGME49_240960	VI	1583489	1586936	2864	109.284	114.269	62.4219	77.5179	83.977	92.3001	149.642	140.511
TGME49_240970	VI	1590190	1598657	3497	21.3679	18.2875	24.6028	21.809	18.5908	23.1422	31.3008	22.831
TGME49_240980	VI	1601752	1613368	6782	40.1462	46.1077	37.0693	37.5004	37.7575	34.8901	47.5359	45.0468
TGME49_240990	VI	1613865	1617972	4108	7.89676	5.98326	6.79985	7.86662	11.4484	8.99801	13.6822	10.0671
TGME49_241010	VI	1618075	1624236	5381	110.552	112.334	93.7529	76.8115	106.776	108.868	123.801	110.574
TGME49_241000	VI	1618178	1620418	2241	153.242	150.099	138.111	110.893	146.132	156.197	154.903	139.563
TGME49_241130	VI	1626196	1636070	8463	5.10205	5.32458	5.80923	7.29336	7.53891	6.94861	7.92444	8.51739
TGME49_241140	VI	1637711	1648102	5067	12.2745	18.1907	11.9078	14.9239	24.7738	24.4272	25.9984	23.0338
TGME49_241150	VI	1649073	1657278	3708	39.1576	38.4219	55.4457	45.5806	33.0141	30.1326	42.1586	34.2064
TGME49_241155	VI	1658182	1659572	1190	93.4375	88.3567	87.3225	93.1463	59.1362	82.8321	112.579	95.9612
TGME49_241160	VI	1659817	1662235	1165	144.604	122.291	142.426	139.528	118.139	112.733	155.223	134.946
TGME49_241165	VI	1663275	1666704	2082	7.0921	6.66797	27.6386	20.799	11.7097	13.3155	23.967	19.2827
TGME49_241170	VI	1668976	1673901	4535	49.1846	52.0912	24.8848	35.7009	31.1876	29.701	44.0477	37.6209
TGME49_241175	VI	1677469	1678119	651	61.1717	77.9594	75.5199	81.4107	71.4459	58.9309	80.3293	66.544
TGME49_241180	VI	1679568	1685121	2771	129.664	137.323	95.1624	98.1961	107.324	119.045	144.724	135.883
TGME49_241240	VI	1685868	1694418	5889	483.5	462.823	252.538	259.835	302.297	307.181	442.726	382.757
TGME49_241300	VI	1695028	1697483	2079	224.477	211.712	116.089	142.228	128.992	146.547	174.309	160.081
TGME49_241305	VI	1705192	1706753	1245	206.113	210.951	102.76	155.481	132.768	144.176	168.655	162.486
TGME49_241310	VI	1709320	1709559	240	418.549	433.36	277.01	212.747	303.303	315.033	296.069	295.307
TGME49_241610	VI	1710615	1713596	2668	125.195	114.646	59.0505	74.2494	76.6664	81.8676	103.359	101.443
TGME49_241710	VI	1719368	1722425	2744	13.3712	15.0949	13.8447	11.8948	17.3913	12.1441	13.3549	13.5843
TGME49_241820	VI	1723536	1731585	7541	141.811	142.599	132.242	130.49	100.29	111.848	123.405	114.899
TGME49_241830	VI	1731401	1735596	3447	26.1562	30.9653	20.0974	22.1253	18.1081	22.2593	27.0067	27.3416
TGME49_241840	VI	1737092	1743926	3995	44.5207	44.3208	41.6735	46.836	41.1595	48.015	74.5827	64.7841
TGME49_241850	VI	1745352	1761778	13935	12.892	17.9651	15.0744	14.0071	10.2241	9.88693	13.676	11.824
TGME49_241860	VI	1765619	1775676	3347	16.1092	16.1152	17.0257	16.5104	15.2396	17.1515	18.439	17.157
TGME49_241870	VI	1775858	1785423	5033	8.09014	11.8925	11.3223	9.37442	8.45112	8.23451	12.9284	12.5405
TGME49_241880	VI	1786365	1801762	7012	45.3701	54.6568	54.9752	54.5207	45.5933	52.5554	45.4985	46.7876
TGME49_241890	VI	1803631	1809967	2436	34.0728	38.4915	41.2815	40.7267	32.7922	37.82	31.693	32.9611
TGME49_242000	VI	1812074	1819730	3927	228.452	297.999	193.054	208.199	211.739	192.319	209.325	214.842
TGME49_242010	VI	1822061	1829515	5736	18.8386	24.5995	22.986	22.4229	13.1728	14.9388	21.2681	19.8644
TGME49_242020	VI	1829766	1836470	5145	18.4806	19.0207	17.591	22.3606	14.3835	11.7563	10.4124	11.9346
TGME49_242030	VI	1836898	1847964	4760	18.1423	22.1848	17.1359	21.7251	15.111	16.237	16.8232	15.1752
TGME49_242040	VI	1848151	1848732	582	1.53762	0.78208	3.8397	2.22104	0.594174	0	2.33206	1.0386
TGME49_242055	VI	1849009	1866605	13561	4.02541	7.48493	3.95494	4.81369	2.81778	2.84964	3.66784	3.31704
TGME49_242070	VI	1866707	1878395	7471	184.046	212.842	178.124	194.173	197.506	177.703	190.422	184.053
TGME49_242080	VI	1879577	1883191	1116	118.076	114.812	113.637	102.218	130.763	107.395	144.797	138.163
TGME49_242090	VI	1884111	1894413	9631	237.731	218.677	178.433	190.286	140.41	170.82	264.344	227.525
TGME49_242100	VI	1894467	1897787	3321	0.943128	1.09647	5.04676	2.53001	9.78803	4.80628	9.11137	7.59906
TGME49_242110	VI	1905948	1908519	2572	0.869843	0.707886	0.868858	2.7642	8.60489	5.66155	7.57412	7.30515
TGME49_242118	VI	1909299	1911467	2169	20.526	15.1094	4.12117	7.15155	15.0664	15.7508	14.6132	18.5325
TGME49_242230	VI	1913969	1915438	1470	0.608771	0.92892	0	0	0.470488	0.380992	0.760369	0.75387
TGME49_242240	VI	1916073	1918882	2810	36.4645	34.5023	38.1729	35.4212	66.7005	73.9436	66.2008	71.7222
TGME49_242250	VI	1921125	1922780	1533	1.75126	1.78149	0	2.95124	4.06038	4.01868	5.98921	3.74588
TGME49_242260	VI	1924138	1933341	8616	17.5531	21.4484	12.8387	16.3531	12.0407	12.0904	12.8246	14.5633
TGME49_242270	VI	1935784	1939955	3428	35.7644	38.9046	31.2911	32.5235	31.0704	38.3937	57.0143	49.0938
TGME49_242290	VI	1941220	1947815	2057	292.787	239.203	369.916	329.602	248.724	254.164	226.203	216.182
TGME49_242300	VI	1949601	1951396	1194	0	0	0	0.541308	1.88254	0.23453	3.27646	3.07971
TGME49_242310	VI	1952840	1954914	1771	14.9065	11.8226	80.7572	85.3976	42.4695	58.0297	39.0403	36.3784
TGME49_242320	VI	1954528	1969188	5214	47.9285	40.5935	125.686	141.127	73.7182	90.0669	72.8563	73.6551
TGME49_242330	VI	1972677	1974115	951	4551.87	4345.66	4134.55	4376.77	4414.25	4971.33	3887.92	4028.67
TGME49_242340	VI	1974526	1977535	1169	1814.09	2092.07	2374.73	2169.52	2381.91	2254.37	1429.65	1744.71
TGME49_242350	VI	1978070	1980239	987	0.45334	0	5.66034	3.929	3.67882	4.8232	4.36808	3.06214
TGME49_242360	VI	1982086	1990000	2172	0.412014	0	2.05774	1.48785	1.2737	1.9339	0.698405	1.46107
TGME49_242370	VI	1995729	1999837	1707	0	0.533299	1.30914	0	0.607749	1.64048	1.07574	0.442638
TGME49_242380	VI	2001784	2006636	3061	118.403	96.2089	106.041	108.53	94.9534	98.5271	115.337	99.8558
TGME49_242390	VI	2006989	2012031	2583	0.173228	0	0.21629	2.25199	0.870212	0.867299	0.958188	0.604545
TGME49_242400	VI	2013666	2019212	1815	0	0	0	0	0	0	0	0.0832599
TGME49_242415	VI	2022517	2040405	12074	9.17203	10.7441	10.5498	11.0004	8.99321	6.47077	8.13992	6.8587
TGME49_242435	VI	2042028	2059876	11197	5.87432	6.26027	4.88972	6.40722	4.83336	4.8518	7.24445	6.32971
TGME49_242460	VI	2061189	2068657	3208	30.755	26.9584	34.4819	30.9259	26.6795	28.8933	26.9033	27.3844
TGME49_242570	VI	2070150	2075941	3905	112.406	115.978	100.719	106.506	136.198	149.086	132.281	127.962
TGME49_242580	VI	2076045	2081321	5277	21.9187	19.0625	14.3983	16.0447	20.1509	16.9811	36.6741	32.7319
TGME49_242590	VI	2081301	2084251	2428	3.50144	2.99948	2.76117	3.19434	3.56064	2.768	11.0485	7.03303
TGME49_242600	VI	2095208	2098592	2346	0	0	0	0.275499	0.147404	0	0.408382	0.515317
TGME49_242610	VI	2100611	2105456	2527	24.5237	13.3291	25.2034	20.5892	19.8426	21.1656	17.5348	18.1197
TGME49_242625	VI	2106628	2141182	27093	3.73244	5.17449	6.59862	5.30788	3.97592	3.84493	3.23563	3.28527
TGME49_242640	VI	2141527	2156743	11551	17.6252	20.077	16.5412	14.4081	13.1127	13.3093	25.1729	18.6383
TGME49_242650	VI	2160596	2161664	1069	22.184	28.528	21.9499	18.1381	21.3502	17.8129	34.2806	31.3825
TGME49_242660	VI	2162739	2173662	3800	98.6738	95.526	116.587	100.605	106.336	105.232	107.005	99.22
TGME49_242670	VI	2174990	2181459	4621	11.5227	10.4903	7.97936	6.64364	12.3851	11.9986	11.2994	12.623
TGME49_242680	VI	2182835	2186552	1770	111.609	121.636	170.444	139.306	126.211	139.698	98.152	106.209
TGME49_242700	VI	2186692	2204191	12349	17.6095	23.2211	14.296	14.1836	18.1459	15.4652	23.1648	19.0737
TGME49_242710	VI	2201800	2203624	774	17.3429	19.4065	17.3233	27.1388	37.0829	26.411	45.18	36.5101
TGME49_242720	VI	2205048	2214451	4881	29.6098	28.0227	27.9281	33.6998	25.7887	31.8984	54.8615	44.4898
TGME49_242730	VI	2215955	2220689	2408	55.0018	80.3354	65.4263	74.751	48.755	42.7951	81.9938	83.4029
TGME49_242740	VI	2222420	2223735	1316	1.36002	1.03762	15.2829	14.4882	7.35764	8.08595	20.081	15.8083
TGME49_242750	VI	2225940	2239479	11703	0.114701	0.116681	0	0.220908	2.31958	2.27316	1.11882	1.17936
TGME49_242760	VI	2244324	2248780	1080	8.90751	13.0651	20.6917	4.18912	23.5342	28.7808	26.3172	26.8186
TGME49_242770	VI	2258124	2263626	4549	8.65582	11.0566	6.6319	4.9728	8.66613	10.588	14.3741	11.7598
TGME49_242780	VI	2263867	2285419	12857	18.5842	25.4898	15.2955	18.2983	12.1034	9.93181	16.8781	15.2602
TGME49_242790	VI	2287517	2307195	6933	30.9141	36.9953	20.3873	22.9797	29.3536	22.6996	20.0144	23.7221
TGME49_242800	VI	2307275	2312172	3047	92.955	94.7837	113.312	125.255	94.9925	97.2336	79.6553	86.8909
TGME49_242810	VI	2312412	2317422	3905	15.6406	20.6313	20.6016	24.4957	16.6484	16.9954	20.0977	18.6268
TGME49_242820	VI	2320066	2323486	3421	204.039	199.977	159.062	158.983	218.645	225.104	200.099	205.185
TGME49_242830	VI	2324495	2343406	8341	20.4653	21.5007	26.7918	28.1279	19.0089	20.9829	23.9392	21.6079
TGME49_242840	VI	2347092	2347451	360	858.228	571.492	830.255	882.408	1047.51	1187.79	951.411	953.714
TGME49_242845	VI	2347764	2349288	222	416.206	507.454	588.875	585.183	693.955	555.013	352.441	514.387
TGME49_242850	VI	2348156	2353383	3158	53.5576	59.743	46.7038	43.6952	42.1585	40.7895	45.8858	44.6778
TGME49_242860	VI	2355936	2361094	2936	42.2149	44.8814	37.2958	39.1843	33.7446	35.2898	30.7281	33.7473
TGME49_242870	VI	2364224	2374287	2967	26.9946	24.8526	21.4658	22.2193	23.0772	14.9122	18.2711	19.2185
TGME49_242880	VI	2374430	2378697	2132	27.0735	30.3163	32.4933	34.1047	24.5732	37.8276	32.8417	28.8483
TGME49_242890	VI	2379136	2399305	11325	11.5763	12.6403	12.6288	12.8408	8.87042	11.0034	10.7721	10.1545
TGME49_242900	VI	2400492	2404408	2664	0	0.34172	0.838853	0.242613	0.908657	1.68186	1.13884	1.73958
TGME49_243100	VI	2405947	2407257	1132	0	0	0	0.570955	0	0	0	0
TGME49_243110	VI	2407634	2409902	2269	0	0	0	0.284849	0	0	0	0.0444004
TGME49_243120	VI	2410534	2411763	1230	0	0	0	0	0	1.366	0	0.0819061
TGME49_243130	VI	2413733	2415296	1564	0	0	0	0.413249	0	0	0	0
TGME49_243140	VI	2416509	2418189	1681	0	0	0	0	0.205716	0	0	0.119863
TGME49_243150	VI	2418424	2420570	2147	0	0	0	0	0.322132	0	0	0
TGME49_243170	VI	2425904	2428367	2464	0	0	1.36041	0.262306	0	0	0	0
TGME49_243190	VI	2432544	2434344	1801	5.58998	4.54918	30.3999	20.4555	34.4657	45.0907	32.8487	32.9196
TGME49_243200	VI	2433919	2440833	6065	223.281	209.461	175.386	205.938	220.571	255.974	221.468	213.033
TGME49_243210	VI	2442596	2451318	6742	55.0847	65.5211	51.3763	54.5471	50.9584	57.4429	76.7479	69.245
TGME49_243220	VI	2450373	2450861	489	46.6663	47.9372	31.9896	18.5041	24.044	24.0516	42.1235	43.3675
TGME49_243240	VI	2453719	2461032	2395	18.4957	16.7244	18.1949	21.0493	15.8105	13.2122	21.2014	20.4854
TGME49_243250	VI	2460907	2481501	6522	82.2583	81.0263	48.5693	54.9502	60.7101	55.087	66.3731	58.6363
TGME49_243265	VI	2485042	2498989	13551	4.85386	5.52547	3.54558	4.76955	3.30472	3.30637	4.1301	3.82132
TGME49_243280	VI	2499374	2510461	3808	30.9617	37.1739	26.7014	29.5325	23.3385	29.1942	23.1884	22.3024
TGME49_243290	VI	2511299	2516929	4834	32.3043	34.9335	34.2094	29.8158	29.4016	33.1354	30.9016	30.5214
TGME49_243298	VI	2520783	2534509	8004	8.60905	8.18898	6.97996	6.17736	6.35106	5.8077	6.71307	5.66404
TGME49_243302	VI	2534872	2536051	665	0	0	0	0	0	0	0	0.151495
TGME49_243310	VI	2536246	2542695	5608	21.3431	23.7	19.5258	23.6262	21.5514	22.67	27.9322	26.3628
TGME49_243320	VI	2542147	2542219	73	6.12941	6.23522	61.2248	8.85372	0	23.0161	22.9673	10.3505
TGME49_243330	VI	2548012	2557374	7176	0	0.190289	0.155707	0.450335	0.385517	0.234138	1.10145	0.554544
TGME49_243340	VI	2558893	2566768	3156	22.6843	22.1384	24.4288	21.4007	15.9975	19.2542	19.7067	19.0253
TGME49_243350	VI	2569930	2576325	3953	12.1115	11.9751	11.8717	13.4071	11.5911	11.051	18.5812	16.795
TGME49_243355	VI	2576394	2578422	1444	0.309866	0	1.54758	1.11898	0.95792	2.32711	1.82457	2.05815
TGME49_243360	VI	2587986	2588480	495	0	0.919537	2.25728	1.95855	5.93813	9.61716	5.16129	3.66344
TGME49_243370	VI	2588680	2589895	1216	0.367966	0.374318	2.75662	5.31514	1.99068	1.61201	2.56062	2.73402
TGME49_243378	VI	2594057	2596146	710	0.630207	0.641086	3.14747	1.36547	1.94822	4.73289	2.92367	4.18586
TGME49_243382	VI	2597293	2600318	2189	1.63526	2.07935	2.5522	1.91918	15.3237	9.46649	11.0877	11.7819
TGME49_243390	VI	2601707	2603949	2243	36.5059	34.2951	51.3095	45.3837	31.4512	31.8357	37.5523	33.1249
TGME49_243400	VI	2605435	2613455	7559	9.23425	10.899	8.72123	11.201	8.37188	7.9278	17.607	13.1345
TGME49_243410	VI	2615285	2618146	1656	63.3613	78.473	72.1961	72.7892	53.1452	54.6192	64.652	60.2885
TGME49_243420	VI	2618215	2619236	1022	18.1693	14.2519	29.5191	27.826	19.1176	19.7281	30.5449	27.0591
TGME49_243430	VI	2618861	2629455	8841	54.9123	48.4723	32.986	41.414	31.4283	41.0811	84.7242	66.8952
TGME49_243440	VI	2629506	2638361	4954	41.3216	47.0882	50.1839	57.4044	36.9263	45.3337	58.2594	51.2874
TGME49_243450	VI	2638486	2643868	2861	60.8378	56.6378	48.4277	43.3742	42.5462	46.6878	50.3143	45.8826
TGME49_243460	VI	2644919	2653491	7355	333.623	426.765	260.462	313.099	236.307	240.852	349.108	322.903
TGME49_243465	VI	2653633	2654517	300	273.688	267.792	221.608	157.272	140.629	140.015	315.895	255.891
TGME49_243470	VI	2660198	2664543	3588	1.62118	0.888014	6.22827	9.00671	8.77052	6.86805	14.8418	8.90078
TGME49_243480	VI	2665229	2670036	2752	26.177	25.471	25.1729	25.1295	19.3512	20.9615	16.7394	16.8945
TGME49_243490	VI	2670238	2679973	2744	27.7208	26.3747	35.019	36.2731	23.5034	26.8395	38.2318	31.244
TGME49_243500	VI	2680886	2686195	1083	0	0	0	0.596788	0	2.84425	1.32696	1.72094
TGME49_243510	VI	2688017	2693521	1996	30.2632	29.9875	36.9465	45.3332	35.17	28.6202	25.1596	26.5994
TGME49_243520	VI	2693265	2694105	841	8.77869	12.4482	10.6288	10.7592	9.86851	7.32537	7.97438	10.5416
TGME49_243530	VI	2694127	2701038	5136	7.40518	10.369	11.0952	8.24261	8.21431	7.4151	10.1042	8.34633
TGME49_243540	VI	2701980	2707797	4195	38.2383	42.8587	49.5417	45.3734	36.4357	30.3726	42.1175	41.3545
TGME49_243545	VI	2711142	2711652	339	1640.64	1548.12	1110.76	1508.08	1936.12	1956.07	2300.72	2185.17
TGME49_243550	VI	2716030	2719603	972	0	0	0	0	0.711541	0	0.657109	0.621879
TGME49_243560	VI	2720998	2723778	645	0.693716	0	12.9925	5.51127	7.50593	5.644	8.66467	6.95059
TGME49_243570	VI	2724727	2726835	1206	1983.27	1983.54	2307.43	2302.85	2425.11	2064.23	1528.32	1842.81
TGME49_243580	VI	2726765	2729353	1662	204.743	174.729	182.864	186.858	211.397	201.513	177.499	198.792
TGME49_243590	VI	2730296	2742655	4309	21.5987	18.0632	22.3004	25.7989	15.4888	17.4815	21.6041	17.9909
TGME49_243600	VI	2743708	2747481	3774	79.4355	90.214	67.651	70.0438	100.151	109.964	127.332	123.675
TGME49_243610	VI	2747706	2752583	4784	22.1666	20.5036	20.0862	20.6704	19.8421	21.1895	32.2592	26.776
TGME49_243615	VI	2752612	2754906	1432	29.2153	42.9106	26.1392	32.4966	35.8608	33.6348	45.4389	38.6938
TGME49_243620	VI	2755012	2759596	2253	76.8584	79.3973	91.7488	80.6109	69.0697	77.0608	79.4135	71.6346
TGME49_243635	VI	2761219	2774494	12779	3.39638	4.73728	6.29543	4.65307	5.70981	5.65361	7.20979	8.13981
TGME49_243655	VI	2776163	2781468	3005	0	0.454413	0.743662	0.645246	0.920623	0.931877	2.68343	1.74333
TGME49_243670	VI	2784122	2784799	678	0	0	0	0	0.765064	0	0	0
TGME49_243680	VI	2793097	2796376	2208	10.639	12.3688	10.627	14.6359	26.938	18.0091	21.406	24.3876
TGME49_243690	VI	2796129	2800386	3427	222.287	211.846	160.577	151.82	290.108	312.959	278.259	275.276
TGME49_243700	VI	2801644	2802450	807	7.20794	5.07625	5.5383	8.00894	6.42768	4.164	10.8826	10.7361
TGME49_243710	VI	2802631	2812436	3443	178.433	180.257	259.298	254.361	141.266	141.845	146.738	149.054
TGME49_243720	VI	2812141	2817512	2949	1.13796	1.69782	7.57784	11.7254	6.33221	10.8251	13.4554	11.0515
TGME49_243730	VI	2818528	2823526	3516	1052.06	995.265	931.603	916.909	1163.96	1269.53	1179.39	1093.96
TGME49_243740	VI	2825414	2833584	1983	4.51283	6.31225	4.78946	9.28904	8.02179	8.47289	10.2667	10.9483
TGME49_243750	VI	2834957	2842627	4118	19.9928	17.6299	16.0087	15.6166	14.4017	16.7963	21.0357	16.9416
TGME49_243760	VI	2844280	2848773	3506	19.654	17.1371	29.6388	25.2556	18.6417	20.1276	34.1808	26.6085
TGME49_243770	VI	2851268	2851747	480	13.0505	6.16377	6.98345	6.73251	18.0109	5.83394	15.8014	12.4881
TGME49_243780	VI	2851572	2856038	3608	32.1199	37.8468	34.0656	34.394	38.338	33.2185	48.8592	42.177
TGME49_243790	VI	2857071	2861282	4212	51.841	50.2503	44.0362	44.3464	50.1637	56.777	58.5522	51.4486
TGME49_243800	VI	2863386	2875952	3720	158.892	165.795	115.94	136.561	120.382	132.336	140.748	132.159
TGME49_243900	VI	2876333	2877322	411	1.08868	3.32241	0	1.57256	2.52415	0	1.16553	2.20608
TGME49_243910	VI	2878678	2880871	2194	72.6031	56.5333	64.1688	59.8009	79.596	75.3041	71.6511	66.0303
TGME49_243920	VI	2881809	2892639	3935	112.572	122.613	166.396	162.361	83.4424	92.584	81.1778	79.7507
TGME49_243930	VI	2893618	2901122	4643	250.274	236.948	136.691	154.168	188.024	184.917	255.938	220.735
TGME49_243940	VI	2901480	2905191	2989	7.0358	7.15725	18.3172	15.785	28.4607	23.8901	39.6122	45.7041
TGME49_243950	VI	2905315	2909589	2720	245.273	220.055	330.276	333.972	242.066	277.249	257.216	247.417
TGME49_243960	VI	2912393	2920220	3780	97.2428	129.025	99.9114	115.244	85.6289	88.3796	136.085	121.213
TGME49_243970	VI	2923808	2933972	7017	6.85486	6.35695	6.68787	6.44755	4.26286	5.78655	8.05555	7.35089
TGME49_243980	VI	2934631	2936799	2169	26.8179	31.0582	32.9694	30.0961	22.9583	22.8516	25.3982	27.9381
TGME49_243990	VI	2937013	2945363	4730	19.3925	20.6896	18.6619	20.1548	12.1362	11.3077	21.1159	19.2437
TGME49_244000	VI	2945472	2955795	4248	31.336	36.913	37.3503	36.9718	33.9052	33.026	39.2428	38.4076
TGME49_244010	VI	2956083	2959718	2654	48.2177	45.62	46.3107	54.7936	54.2037	52.9671	49.6661	50.0686
TGME49_244015	VI	2961285	2961786	255	0	0	0	0	0	0	0.626186	0.395076
TGME49_244020	VI	2962180	2967222	3296	36.5859	41.1532	45.4263	48.8271	39.554	35.5984	47.6707	47.9117
TGME49_244030	VI	2968116	2971153	3038	0.589134	0.149826	0.367792	1.06373	1.59359	1.19828	2.57544	2.95137
TGME49_244040	VI	2972060	2987532	6761	12.0449	20.0623	16.857	17.255	12.6335	14.9106	20.5472	17.4936
TGME49_244050	VI	2987890	2996192	6186	9.83718	13.6124	9.21192	12.2243	9.97848	8.10301	11.3447	10.6917
TGME49_244060	VI	2997170	3008149	7304	43.0968	51.4435	27.2301	30.6613	36.5978	36.7289	53.5501	48.2481
TGME49_244070	VI	3006085	3008149	2065	30.227	32.6224	13.5273	19.2488	24.7006	36.614	32.8634	32.4431
TGME49_244080	VI	3007544	3011457	2170	121.244	110.856	74.6618	90.2467	108.842	110.076	99.4857	94.0591
TGME49_244090	VI	3011559	3017080	4027	9.4445	8.87283	13.0409	10.5126	8.75901	9.94392	15.4642	13.034
TGME49_244100	VI	3019802	3028649	2270	80.028	99.3556	85.155	95.3822	68.4763	58.3497	57.5753	61.2677
TGME49_244105	VI	3028417	3029293	877	66.8364	51.3819	49.0514	59.6944	30.1646	33.5269	40.7842	38.3105
TGME49_244110	VI	3029431	3035630	1843	334.068	450.108	496.534	432.225	362.79	337.159	246.057	302.097
TGME49_244120	VI	3036940	3047855	9038	15.2482	21.6052	12.2392	14.3023	13.7742	10.9062	16.8635	16.0402
TGME49_244130	VI	3048050	3058828	9693	13.7332	18.7835	5.64843	8.83499	10.7385	10.5737	15.9051	13.7195
TGME49_244140	VI	3060661	3066036	3471	9.66826	11.0809	8.36968	11.8241	8.66764	5.40534	7.93557	8.03982
TGME49_244150	VI	3066280	3072141	2439	41.8278	41.4301	44.2085	37.0992	39.1321	37.1994	29.7227	31.2064
TGME49_244160	VI	3072214	3076256	3445	16.3653	26.5571	15.5683	18.8549	20.6281	20.3214	20.0002	18.2042
TGME49_244165	VI	3082042	3084313	1253	34.8173	32.8755	29.4275	20.6328	37.12	27.4889	28.3545	31.6384
TGME49_244170	VI	3084537	3088241	1711	34.5196	29.9279	24.1625	29.4641	34.2575	40.5887	50.6283	48.5764
TGME49_244180	VI	3091298	3093451	2154	13.8139	20.4975	11.9309	9.30175	10.8366	12.7404	20.7566	22.754
TGME49_244190	VI	3097812	3106313	7911	78.9296	109.089	59.8859	66.503	74.7045	67.2197	74.7422	71.843
TGME49_244200	VI	3106755	3116149	5292	65.4429	60.2938	69.465	81.0344	55.021	55.5084	59.8036	57.3779
TGME49_244210	VI	3118288	3126611	4276	53.1056	62.4316	63.8897	55.3968	46.5014	45.4491	68.5986	70.8463
TGME49_244220	VI	3126784	3128611	1828	21.6625	33.3659	25.6722	27.4015	13.2421	18.9954	27.5155	19.1238
TGME49_244230	VI	3128652	3131088	2437	42.6883	44.0789	35.7626	36.0688	24.9034	30.2206	36.4958	28.1316
TGME49_244240	VI	3132382	3136673	1874	36.6505	39.1049	95.6964	86.0497	110.533	97.278	80.5204	85.7726
TGME49_244250	VI	3137963	3141647	2683	217.219	193.74	129.934	145.741	181.862	194.027	194.404	193.66
TGME49_244260	VI	3144014	3145227	1214	80.9017	64.1138	39.5767	45.2531	131.744	137.477	133.174	140.038
TGME49_244270	VI	3145388	3154687	3908	23.6432	23.9931	24.0168	24.4769	22.0334	26.7274	39.5312	34.1959
TGME49_244280	VI	3156043	3158643	2120	866.084	804.278	552.615	523.459	409.588	479.22	394.222	383.661
TGME49_244290	VI	3157584	3171721	5790	48.8791	52.2385	43.6134	46.7718	41.0611	44.8337	47.4896	44.1692
TGME49_244300	VI	3173479	3182290	4519	20.496	28.3034	17.9261	25.6011	21.2735	23.0517	17.0313	16.0848
TGME49_244310	VI	3182571	3187429	2388	89.658	89.3949	116.508	120.17	89.5657	81.6165	95.5524	93.0452
TGME49_244320	VI	3188179	3192029	1991	1489.99	1405.41	1839.9	1746.95	1925.74	1659.36	1318.84	1522.12
TGME49_244335	VI	3193646	3196292	1656	1.21589	2.47375	5.39784	3.90291	3.34115	2.7056	7.95494	6.50946
TGME49_244350	VI	3198468	3209731	3441	27.8273	23.4795	26.9515	27.4231	22.6117	28.3203	22.5525	20.7725
TGME49_244360	VI	3211037	3214703	1152	0	0	4.84962	6.17147	1.35082	5.83394	2.28705	3.36689
TGME49_244370	VI	3217534	3222418	4885	79.6886	76.4053	118.025	115.438	83.3552	94.757	93.8942	90.4638
TGME49_244380	VI	3222551	3228709	3260	125.518	158.751	140.697	161.58	114.987	102.649	102.149	110.479
TGME49_244390	VI	3230372	3237862	3099	100.78	114.711	123.669	127.429	103.609	99.2165	91.9472	90.5205
TGME49_244400	VI	3239558	3242250	2693	24.4243	18.5922	14.9368	14.16	17.2712	17.6773	16.2464	18.4617
TGME49_244406	VI	3242992	3246828	1325	1.35078	1.71763	8.43284	5.60958	5.87223	4.86088	9.46013	8.51576
TGME49_244408	VI	3246846	3248588	1193	30.3799	33.9566	22.9465	20.8578	24.0588	19.4823	32.3236	28.7118
TGME49_244412	VI	3247945	3252185	3883	19.9352	20.0449	15.8265	25.6331	17.945	19.0388	28.9706	25.5169
TGME49_244420	VI	3252276	3254574	2299	31.9188	29.302	37.4233	33.1735	24.8188	26.4316	31.9146	35.3416
TGME49_244430	VI	3254684	3259105	3333	23.5604	20.553	14.4153	21.6216	15.4073	19.2399	26.3734	22.8058
TGME49_244440	VI	3259480	3263667	3868	193.878	186.163	213.909	228.585	127.577	134.078	108.591	103.87
TGME49_244450	VI	3266124	3275087	6042	11.2565	11.5262	14.0547	16.2062	10.2449	12.3283	31.5946	25.9865
TGME49_244460	VI	3275164	3286390	8308	57.8697	69.6069	59.7813	76.3169	37.3364	42.6043	60.8977	53.0339
TGME49_244470	VI	3288729	3302088	9843	44.5038	49.3645	36.5526	39.168	43.0022	45.8038	49.5839	43.1667
TGME49_244480	VI	3303679	3305409	1074	3.95786	9.3238	2.08073	4.81431	7.08361	7.03984	12.7117	8.11396
TGME49_244490	VI	3305741	3308004	2264	9.48651	9.85131	5.92236	7.7079	11.0738	11.6266	10.7557	9.8564
TGME49_244500	VI	3308061	3321307	9760	43.186	51.743	34.5738	39.2362	36.5119	41.1149	35.2648	35.7457
TGME49_244510	VI	3326778	3331059	3741	8.19303	9.36866	5.37619	7.94728	7.67232	7.11114	7.32015	6.62474
TGME49_244515	VI	3332484	3334894	1838	2.43442	4.95289	4.25542	3.86808	4.23324	3.35182	4.43066	3.78203
TGME49_244520	VI	3335695	3343558	2802	27.9455	29.8899	27.5151	28.833	20.1167	23.4857	31.1719	24.9344
TGME49_244530	VI	3343607	3347171	3565	356.577	369.627	254.499	253.724	239.787	263.534	311.696	307.631
TGME49_244540	VI	3347096	3351957	3218	75.0843	74.6124	56.2495	52.9228	62.381	73.9667	100.555	93.0274
TGME49_244550	VI	3351927	3355871	3945	17.6937	19.8452	22.517	19.1685	15.6469	17.036	16.1499	14.9904
TGME49_244560	VI	3355924	3363009	4313	803.703	1043.37	891.058	958.992	621.622	631.413	614.33	662.127
TGME49_244570	VI	3363390	3371183	3526	19.8597	26.0116	18.0627	19.9799	13.6323	16.5984	14.7405	13.8431
TGME49_244580	VI	3371654	3376851	3995	16.4643	18.6854	22.6547	20.9508	15.4078	17.1032	17.4666	18.7241
TGME49_244590	VI	3378440	3385102	1644	3.26604	1.10747	5.43724	5.30738	7.67763	6.47269	7.67306	8.08897
TGME49_244600	VI	3385701	3390749	3127	42.8559	44.8329	40.7349	38.7545	33.2317	30.8954	39.7534	35.0528
TGME49_244610	VI	3391639	3395963	3186	38.9023	39.431	42.2602	44.8327	39.78	32.6964	49.0409	43.3366
TGME49_244620	VI	3396574	3402785	2554	0.700778	0.178219	3.93742	3.28981	3.45267	3.17966	6.47087	5.95631
TGME49_244630	VI	3404385	3411955	4766	11.6415	11.2694	12.6599	16.0021	19.6268	17.3917	22.6986	18.8658
TGME49_244640	VI	3412156	3420372	6034	38.5232	39.7539	19.6287	26.9925	26.8784	29.5158	28.2492	28.3584
TGME49_244645	VI	3420560	3422908	675	112.027	143.969	87.7328	121.604	93.7527	121.553	122.656	123.804
TGME49_244650	VI	3422915	3426595	1556	162.041	216.031	183.832	233.025	155.236	133.896	136.434	150.146
TGME49_244660	VI	3430495	3440611	7141	13.3463	17.2099	13.6129	13.35	17.3365	15.921	18.0674	16.5697
TGME49_244670	VI	3439936	3444884	4949	61.0278	59.5061	66.6031	58.246	48.2833	53.4143	51.2846	47.8175
TGME49_244680	VI	3445764	3451346	5121	17.9992	22.6652	17.6734	19.5625	16.6793	18.0999	20.0337	21.4729
TGME49_244690	VI	3451550	3455085	3536	166.527	180.472	130.189	146.409	113.151	127.027	151.052	147.014
TGME49_244700	VI	3455567	3469475	8696	186.033	222.142	131.124	129.584	116.019	126.747	164.139	151.267
TGME49_244710	VI	3469676	3471053	1035	73.926	76.0817	98.2406	140.817	100.067	109.035	180.428	147.029
TGME49_244715	VI	3471054	3473015	690	12.321	8.90551	63.1547	72.1257	70.6653	64.5284	98.6992	78.9895
TGME49_244720	VI	3481863	3491060	8445	10.6497	11.5881	37.3112	35.8557	37.304	34.784	41.588	38.4428
TGME49_244726	VI	3495342	3502036	5136	0.522718	1.06348	1.74042	1.13257	1.5486	1.09046	1.50786	1.60846
TGME49_244728	VI	3503095	3511719	3099	4.47591	4.70005	4.68718	6.56958	6.97421	6.95781	7.62577	7.37948
TGME49_244732	VI	3514035	3518080	2534	2.82524	7.18502	12.7874	9.8198	10.7809	10.1668	12.4768	12.8415
TGME49_244840	VI	3519828	3525205	2009	38.5308	52.45	54.7831	41.6618	45.3562	34.7074	36.6408	42.5744
TGME49_244850	VI	3526893	3538307	4001	0.167751	0.455057	0.837805	1.6154	1.6854	1.11984	1.91565	2.06475
TGME49_244860	VI	3538183	3545534	3189	14.7325	12.489	13.6647	10.3363	13.609	16.5963	13.8197	12.1942
TGME49_244870	VI	3545764	3552508	2133	45.6257	45.5598	36.6688	46.9666	33.6406	37.2847	35.933	37.5253
TGME49_244880	VI	3554880	3578740	9328	20.8901	23.8613	26.4724	27.7153	22.2248	19.243	18.9925	18.571
TGME49_244890	VI	3582990	3584469	621	0	0	0	0	0.556858	0	0	0.162229
TGME49_244900	VI	3587846	3589100	321	0	0	0	0	0	0	0.497437	0.313846
TGME49_244910	VI	3590002	3598230	5257	42.8977	43.7248	45.8036	41.4939	33.7784	34.2512	46.1233	39.698
TGME49_244920	VI	3602979	3605021	1713	8.35861	7.97147	7.82733	6.79147	3.83559	7.35628	6.05898	6.35167
TGME49_244930	VI	3612189	3615310	312	8.60475	12.4005	7.16251	11.3935	14.9629	20.6432	7.16501	10.8171
TGME49_244940	VI	3625823	3628867	2313	13.8316	18.3997	21.0138	11.5963	14.1284	15.6177	12.9785	11.1285
TGME49_244950	VI	3635463	3636471	291	0.768809	1.56416	11.5191	8.88414	8.9126	25.0198	8.50515	13.6749
TGME49_237700	VI	3639611	3640196	186	4.81126	2.44715	0	6.94969	7.43675	1.50553	5.15088	10.8327
TGME49_292600	VI	3641865	3642993	1066	23.9254	14.0907	13.6262	8.48827	20.7615	16.2869	19.0235	14.8376
TGME49_292610	VI	3643183	3647017	1098	14.6704	17.4109	12.2115	11.7727	9.76328	11.4766	13.5246	15.9191
TGME49_207350	Ib	3876	4536	600	0.745745	1.51724	3.72451	6.46321	3.45809	3.73372	12.2419	13.9363
TGME49_207360	Ib	4720	5926	491	0	0.927028	0	0	0	0	1.95125	2.15441
TGME49_207370	Ib	8285	18442	9680	67.5331	71.6377	60.1385	74.781	51.0497	62.7173	77.4551	66.5247
TGME49_207365	Ib	8639	8720	82	5.45667	0	0	3.94098	2.10859	6.82998	13.631	9.82873
TGME49_207390	Ib	20723	29393	3106	31.6209	33.7788	36.3337	40.6812	25.7186	35.2516	45.3944	39.3766
TGME49_207400	Ib	29581	36486	4298	303.364	256.444	137.914	163.31	245.719	263.61	472.234	421.695
TGME49_207403	Ib	36715	37586	477	8.4424	0.954236	0	3.38743	13.0494	8.21888	34.4796	17.6356
TGME49_207407	Ib	38219	40199	621	0.720527	0	0	0	1.11372	3.60746	3.08555	2.51456
TGME49_207410	Ib	40400	46323	1968	0.682084	0.693858	6.24536	8.70301	3.60218	7.82602	10.5478	9.67516
TGME49_207420	Ib	47508	48669	965	192.425	147.636	233.891	214.659	193.331	187.46	195.419	160.095
TGME49_207430	Ib	49051	60626	2538	83.0369	84.7392	73.3015	77.6706	58.8611	50.9746	86.5706	80.5599
TGME49_207440	Ib	61860	65919	1848	1968.96	2236.08	2225.03	2065.57	1939.94	1914.74	1271.93	1456.46
TGME49_207450	Ib	68765	75835	2773	69.8682	82.4002	71.9247	72.8364	65.5329	58.5708	77.5066	79.7636
TGME49_207460	Ib	75942	82702	2201	101.443	96.3696	87.3169	91.0312	102.124	97.584	94.3482	95.5264
TGME49_207470	Ib	86845	91223	2004	4.91209	6.81393	12.2663	13.2231	23.6406	27.5278	29.0033	26.4178
TGME49_207480	Ib	92667	140197	15246	5.51752	7.44885	6.59594	9.64437	10.9327	9.33063	10.7876	11.9835
TGME49_207590	Ib	141985	145926	2934	35.686	33.0441	16.3756	21.1475	27.7567	32.8323	33.9872	37.8564
TGME49_207600	Ib	146128	150301	3354	11.2062	9.09256	6.6628	6.0701	13.1972	11.1878	17.3769	16.3402
TGME49_207610	Ib	152054	153928	1875	0	0.242758	4.17145	4.13646	3.13533	6.1233	8.26065	8.40881
TGME49_207620	Ib	155254	164336	3457	153.183	176.17	148.032	166.114	141.345	146.697	125.035	123.869
TGME49_207630	Ib	164499	170741	2264	28.8548	34.2785	21.4686	25.693	21.3076	21.5217	21.0881	23.7177
TGME49_207640	Ib	170768	187132	4822	76.7861	82.3593	81.797	87.8606	65.5474	58.9443	42.701	52.2421
TGME49_207650	Ib	189414	191384	1971	0.227015	0.923736	1.13379	0.983746	3.15807	3.12564	1.49875	2.37677
TGME49_207665	Ib	194108	205960	2478	16.4317	16.8072	19.6145	13.8237	36.0741	37.97	32.9923	38.7854
TGME49_207680	Ib	207747	211270	2175	142.566	147.852	220.902	186.319	157.88	131.453	132.844	127.841
TGME49_207690	Ib	214140	217728	1044	147.22	148.454	144.485	159.723	119.576	117.215	100.181	103.929
TGME49_207700	Ib	218560	220395	1836	1.21854	3.71872	13.3887	11.6169	8.66406	5.64329	10.6539	9.87691
TGME49_207710	Ib	223762	230018	1950	46.1215	38.7479	60.1651	56.5117	49.832	43.7994	44.9553	47.6341
TGME49_207720	Ib	232184	244742	5642	21.2145	23.0328	26.4386	27.6651	21.9732	19.0591	17.9998	15.8652
TGME49_207730	Ib	245016	250503	5161	0.130047	0	2.16499	2.12894	0.93806	1.19369	1.29945	1.57139
TGME49_207740	Ib	251565	254588	2573	0	0	0	0	0.806395	0.435335	1.42735	1.07675
TGME49_207750	Ib	256240	264886	3936	164.155	158.431	170.328	185.144	144.746	146.418	201.361	185.031
TGME49_207760	Ib	265826	276584	6142	48.2634	55.3957	53.3025	60.4019	45.9427	44.9086	35.9027	38.8822
TGME49_207770	Ib	277759	285218	2825	162.031	168.937	192.224	186.804	178.107	189.429	120.366	137.94
TGME49_207780	Ib	299632	300830	815	3.29409	2.79246	35.6456	46.3924	57.4934	55.3186	32.7192	28.3073
TGME49_207790	Ib	300875	302328	1334	1.67709	1.36483	17.5895	19.1377	20.0901	23.7206	18.4335	18.427
TGME49_207800	Ib	304072	307888	2570	26.9861	26.2122	40.8681	34.5794	25.2293	27.785	26.033	28.1457
TGME49_207820	Ib	313287	319259	3030	168.937	164.793	185.672	200.936	133.302	135.394	140.39	140.627
TGME49_207830	Ib	321399	326829	3375	37.1215	36.9531	48.0048	48.8332	52.7679	57.6653	48.7075	47.9693
TGME49_207840	Ib	326464	329136	1369	2015.96	1869.89	2848.06	2741.08	2509.45	2559.54	1693.64	2037.89
TGME49_207865	Ib	332855	369802	8745	0.537243	0.650616	0.766622	0.812983	1.18631	1.1848	1.85332	2.11396
TGME49_207875	Ib	371018	382846	3805	1.46993	1.31587	0.880961	1.35889	2.22663	3.16459	3.27328	3.83915
TGME49_207880	Ib	382973	407032	7274	8.18126	8.16604	8.75571	9.86275	13.0974	14.321	31.863	27.5337
TGME49_207900	Ib	409001	423866	4592	32.6913	36.7745	33.7006	32.2316	30.5746	27.1979	38.4241	33.4791
TGME49_207910	Ib	424721	436988	3947	32.9322	34.8845	22.6471	26.855	18.6616	21.7808	40.3947	35.2363
TGME49_207920	Ib	437183	442536	3573	24.0442	24.7777	23.6104	18.903	24.196	21.0825	32.2438	31.5796
TGME49_207930	Ib	442433	447643	3212	64.916	60.7225	56.0067	46.0796	61.0979	52.7452	84.1637	77.5657
TGME49_207940	Ib	448535	455060	2408	34.469	33.4573	44.0816	39.1873	29.5115	34.4222	46.8489	39.871
TGME49_207950	Ib	457287	459062	1226	92.7011	86.1335	125.77	101.218	116.069	125.853	132.652	131.395
TGME49_207955	Ib	459125	460086	672	3.99506	5.4187	1.66273	4.80894	5.14597	4.1671	10.5739	7.94562
TGME49_207960	Ib	462934	473319	3778	34.7014	41.8063	39.6308	34.8138	33.6381	36.9864	39.7714	37.9058
TGME49_207965	Ib	475583	483112	4591	0.389847	0.297432	0	0.28156	1.80776	1.2199	2.93895	2.55647
TGME49_207970	Ib	484517	495311	4353	2.05581	4.23488	4.87702	5.41942	6.03756	4.11713	7.11634	6.43395
TGME49_207980	Ib	495410	498431	2034	15.6188	17.6787	13.7334	13.3459	19.7217	13.7674	18.37	15.5773
TGME49_207990	Ib	499653	509468	4007	40.4232	52.3668	58.8374	61.7772	42.676	41.8611	30.206	37.3738
TGME49_208010	Ib	509675	516072	3528	37.7946	42.3175	38.6386	38.9295	42.1969	43.2585	45.7353	42.705
TGME49_208020	Ib	517008	529249	12017	1.0798	1.21207	2.88241	2.95812	3.9424	4.54404	17.1145	12.4201
TGME49_208030	Ib	531350	534470	3121	1245.28	1121.81	1225.83	1286.64	1101.69	1198.63	1792.42	1587.8
TGME49_208040	Ib	535392	548629	5602	15.056	18.0378	18.3499	21.1133	12.2225	18.0454	18.6699	15.394
TGME49_208050	Ib	548870	573347	12697	8.38721	12.2244	12.5842	12.675	7.81659	8.97628	11.9409	9.89037
TGME49_208070	Ib	575174	589943	12299	14.1521	17.4311	12.8097	12.7173	8.15388	8.28771	13.7814	12.0576
TGME49_208080	Ib	590158	591177	430	10.4057	10.5854	15.591	6.01229	14.8778	14.3271	15.7821	11.363
TGME49_208090	Ib	591300	595118	2186	20.3664	18.9481	12.7785	18.479	13.6046	9.99189	12.3447	12.2128
TGME49_208200	Ib	595127	602126	3352	51.1921	58.7974	60.3343	51.8677	51.3246	43.9425	55.2583	62.9653
TGME49_208300	Ib	602282	604569	1840	102.864	101.919	135.418	151.921	109.287	114.142	106.437	116.431
TGME49_208310	Ib	604659	607644	2544	38.0787	44.9087	38.6505	45.8573	43.566	47.9924	54.5125	57.342
TGME49_208320	Ib	607752	611249	3065	27.5913	27.0281	23.3313	31.4199	28.8268	37.9158	40.818	38.5557
TGME49_208330	Ib	611725	613316	1149	0.778846	0	0	0	0.300965	0	0.694854	0.613761
TGME49_208340	Ib	613632	623526	5247	48.2666	49.5335	44.6132	46.6233	35.095	41.3613	46.1199	46.2634
TGME49_208350	Ib	624121	628919	3092	36.1778	38.348	40.1119	33.6539	28.7988	26.5357	49.06	42.5036
TGME49_208360	Ib	630499	634459	3961	22.2537	19.3054	18.0537	16.154	11.1748	17.9569	28.1381	21.8479
TGME49_208370	Ib	635899	644705	7410	122.58	122.392	99.5212	111.907	100.779	119.116	246.487	207.614
TGME49_208380	Ib	642139	644104	1332	3.35921	3.07548	25.1656	31.2971	16.0962	23.1255	43.6955	35.8883
TGME49_208390	Ib	645585	653192	4311	21.5887	31.3055	40.9514	25.4121	26.4711	23.1896	29.2057	27.4705
TGME49_208400	Ib	653249	668165	9785	26.9337	33.4924	25.0077	22.5238	18.9073	17.2282	25.0082	22.6559
TGME49_208410	Ib	670159	683458	4964	19.4248	18.9349	18.6826	22.0041	16.963	16.1902	28.9986	25.4195
TGME49_208420	Ib	690615	704687	6087	46.8985	42.7354	40.2922	41.2512	37.2113	42.8301	70.1458	59.3345
TGME49_208430	Ib	703229	709735	2587	77.3995	78.7356	84.2225	78.9476	92.4341	90.7091	125.884	111.298
TGME49_208440	Ib	709803	711310	1508	231.735	230.302	422.341	369.02	318.291	334.624	307.76	302.4
TGME49_208450	Ib	712001	715604	1588	949.134	890.134	561.842	562.072	910.688	849.081	1551.12	1438.75
TGME49_208460	Ib	717904	717975	72	6.21454	0	0	0	0	0	0	1.39923
TGME49_208470	Ib	719214	719285	72	0	0	0	0	0	0	0	2.79846
TGME49_208480	Ib	719597	719678	82	0	0	0	0	0	0	0	1.22859
TGME49_208490	Ib	720813	727483	4063	30.285	33.1043	23.5131	32.5308	25.0654	23.7091	38.3572	34.7262
TGME49_208500	Ib	729259	738655	4321	74.5055	91.3291	83.782	90.7931	65.7045	64.3529	107.573	94.1113
TGME49_208510	Ib	738811	746957	5479	29.8489	34.4763	24.9819	26.3058	13.5698	17.0706	43.147	32.6376
TGME49_208530	Ib	749125	761396	3785	87.3024	95.9647	102.436	88.7091	100.362	96.401	102.704	90.2175
TGME49_208540	Ib	763764	772128	3870	23.9332	29.1098	24.83	27.0553	23.188	18.0174	20.4857	22.2054
TGME49_208550	Ib	773879	777480	2676	106.093	98.1441	90.1898	92.0211	83.6739	93.343	127.784	118.213
TGME49_208560	Ib	777175	783979	3284	75.551	70.0636	92.8858	83.5455	55.3358	78.3638	77.2374	75.7271
TGME49_208570	Ib	785698	792389	4534	97.5028	101.495	90.0733	105.416	85.1938	91.5931	114.317	113.143
TGME49_208580	Ib	792794	802677	4480	33.159	37.0842	34.5431	35.9228	24.0831	19.002	31.1335	30.898
TGME49_208590	Ib	803267	812625	2880	151.169	152.277	127.254	140.822	129.018	127.083	139.08	131.405
TGME49_208710	Ib	813499	820889	3988	13.3516	18.547	11.2071	15.1532	19.2068	15.9395	23.0828	20.8663
TGME49_208718	Ib	823659	825936	1755	287.08	310.45	234.294	279.336	228.569	227.534	287.556	273.072
TGME49_208722	Ib	826177	827161	666	207.599	221.434	176.998	149.45	152.135	169.027	239.996	211.473
TGME49_208730	Ib	831702	838383	5775	24.29	27.4285	176.551	185.447	125.18	132.862	287.71	270.117
TGME49_208740	Ib	838554	842087	2555	36.3387	39.1928	90.9625	89.4225	85.6063	89.3243	181.114	201.351
TGME49_208750	Ib	844742	849293	2409	72.1599	68.3984	73.748	76.8664	62.5873	70.4432	62.1741	63.5455
TGME49_208760	Ib	849860	853598	1920	5.36004	1.42241	10.1842	15.6531	18.191	19.6895	23.8269	18.5223
TGME49_208770	Ib	854779	855860	743	0.602217	0.612612	4.51152	12.1783	11.6356	6.78402	12.4647	9.89818
TGME49_208780	Ib	856841	860205	2348	60.5997	53.1162	96.1265	90.4244	63.2559	69.1724	77.6625	73.7134
TGME49_208790	Ib	860351	865121	2250	140.001	134.225	137.558	134.578	136.479	122.217	133.384	123.11
TGME49_208800	Ib	865285	869980	2285	111.813	116.233	98.5323	113.849	130.832	105.394	136.442	136.038
TGME49_208810	Ib	871215	875641	3108	2.73536	2.48967	17.0766	13.725	8.51171	5.22577	15.9523	13.8086
TGME49_208820	Ib	875352	887191	6310	13.473	13.7056	31.5196	33.6476	20.0306	18.0621	26.7099	22.1925
TGME49_208830	Ib	888007	891282	3276	502.012	419.463	639.681	631.722	421.125	453.808	342.458	389.77
TGME49_208842	Ib	891409	906203	7385	66.6778	73.684	66.1182	72.2024	43.4778	51.8727	46.7789	46.6071
TGME49_208850	Ib	906713	909227	1345	59.8814	52.1162	42.368	65.5932	90.2446	83.4882	58.5286	76.2138
TGME49_208910	Ib	910662	923142	11505	11.9008	14.48	10.3917	10.9546	11.0461	10.0767	7.62649	9.17252
TGME49_208970	Ib	924311	929450	3575	100.879	82.3127	92.6699	104.767	85.7026	94.1524	103.868	102.633
TGME49_208980	Ib	931464	934581	2955	15.3692	15.0953	15.503	14.6543	16.0324	15.1623	18.1562	15.7168
TGME49_208990	Ib	935519	938839	3321	18.0542	26.6578	34.6544	34.6417	21.8669	22.4293	25.7715	23.3584
TGME49_209000	Ib	939703	979021	37414	7.11581	9.79954	4.83806	5.21701	4.65373	5.94278	7.90193	6.97139
TGME49_209005	Ib	981259	982519	222	0	0	0	5.82271	0	0	2.51744	4.76494
TGME49_209010	Ib	983208	986084	1970	29.4134	27.1485	36.8669	32.6441	33.7032	33.1202	22.6142	27.2573
TGME49_209020	Ib	986227	993861	3704	10.3889	14.3777	11.4631	10.2078	9.3361	9.67703	8.98832	8.30924
TGME49_209030	Ib	997416	1004487	6640	1693.26	1664.18	1727.69	1693.62	1759.72	1940.93	1594.31	1588.68
TGME49_209040	Ib	1001082	1005391	1491	18.6061	11.6006	32.2241	52.4513	57.8668	78.318	134.403	113.887
TGME49_209045	Ib	1006726	1008127	930	0.481126	0	4.80581	11.8145	10.7833	21.3786	12.1904	11.266
TGME49_209050	Ib	1009856	1016912	6264	47.752	52.6091	34.7835	33.2241	51.7278	53.2431	41.1557	42.7167
TGME49_209060	Ib	1018771	1028216	4707	38.6894	42.355	42.0164	44.214	28.3215	26.474	26.7147	26.4543
TGME49_209070	Ib	1028929	1031914	2005	109.24	124.746	87.4934	108.311	95.7227	98.6038	139.17	121.572
TGME49_209080	Ib	1031896	1034185	2290	49.0433	69.3688	40.2539	52.3548	40.7722	38.397	68.7519	60.5347
TGME49_209090	Ib	1034840	1035346	507	325.657	463.7	423.139	392	296.7	281.686	196.054	249.278
TGME49_209095	Ib	1035499	1038207	936	183.568	216.157	268.594	267.92	206.34	208.825	156.095	152.247
TGME49_209100	Ib	1037832	1047255	3086	76.1211	95.1345	86.535	83.4605	74.4061	64.6989	73.2415	78.4638
TGME49_209108	Ib	1048356	1052175	2329	26.3204	37.7192	44.1376	31.9137	45.806	31.0208	29.2753	34.1078
TGME49_209112	Ib	1052226	1053746	489	116.666	67.019	100.539	62.1209	67.8889	61.2743	75.5937	72.7256
TGME49_209120	Ib	1053612	1055751	1249	89.0237	63.7749	85.8813	71.411	63.8182	55.3781	58.3609	63.4392
TGME49_209130	Ib	1057111	1068855	4369	16.7447	23.0242	17.6464	14.7933	11.3581	12.6266	13.8882	12.7631
TGME49_209140	Ib	1069269	1075437	3426	47.8661	56.4646	49.5731	53.5771	29.8268	37.517	32.3456	32.714
TGME49_209150	Ib	1075530	1080178	3713	97.0694	103.219	80.3482	83.2924	60.6307	70.4409	60.4435	63.1111
TGME49_209160	Ib	1079616	1090087	3473	97.5288	112.384	121.612	109.519	103.404	104.739	69.448	71.9686
TGME49_209170	Ib	1091484	1094310	2827	107.865	111.418	67.1913	67.6728	83.7917	92.0223	80.5165	79.6833
TGME49_209180	Ib	1099010	1102174	3165	1.27236	1.86958	4.58944	7.14731	4.20652	5.48556	8.34964	7.44841
TGME49_209190	Ib	1103118	1109844	4292	28.4085	32.8758	27.0747	27.1057	29.2068	23.9447	29.5396	28.93
TGME49_209200	Ib	1111747	1120947	3424	67.7574	76.9696	44.3808	59.46	60.6479	61.7471	60.5086	62.1709
TGME49_209210	Ib	1121323	1134686	8959	29.8415	40.9496	28.0616	32.8247	28.5633	31.1005	40.8417	37.9858
TGME49_209230	Ib	1134997	1135069	73	6.12941	6.23522	0	0	9.47422	0	15.3115	13.1106
TGME49_209240	Ib	1135389	1142062	3215	20.3891	18.3342	20.5051	21.209	23.8786	22.6462	20.7357	18.5038
TGME49_209250	Ib	1142574	1152464	5141	271.245	337.327	194.847	210.139	216.929	233.131	268.743	260.885
TGME49_209260	Ib	1153498	1158382	1608	560.978	704.128	578.48	615.372	598.607	587.922	508.078	556.601
TGME49_209270	Ib	1160757	1168507	5421	9.49205	12.8465	6.5957	8.76307	5.74116	6.5087	10.545	9.18984
TGME49_209280	Ib	1177493	1188102	6312	20.2032	28.1237	23.7207	24.2166	17.6685	17.9233	21.6673	21.3875
TGME49_209290	Ib	1190396	1192527	2132	1396.07	1704.11	1164	1174.72	1335.31	1240.3	1055.69	1259.49
TGME49_209300	Ib	1193612	1206690	1896	2.83194	2.04059	17.6796	19.7714	15.6854	23.6311	35.0347	30.3934
TGME49_209410	Ib	1206335	1207043	577	3.87736	4.33872	21.3013	30.2438	15.2827	11.6477	26.9819	24.2695
TGME49_209420	Ib	1207392	1210323	2187	247.354	308.65	259.54	280.309	220.973	204.74	199.871	217.151
TGME49_209430	Ib	1210505	1214581	1790	79.7406	77.6842	121.411	106.878	84.3272	87.294	68.242	78.3162
TGME49_209440	Ib	1218128	1229281	10992	18.6029	27.0196	15.8576	17.6104	9.98857	9.6553	13.5461	11.649
TGME49_209450	Ib	1228689	1241659	7949	49.3942	58.1776	48.6355	43.9472	39.9797	38.9976	49.225	43.7501
TGME49_209460	Ib	1244290	1248772	3285	14.6425	13.3018	14.2858	14.7562	13.8429	15.8555	18.7627	17.6188
TGME49_209470	Ib	1249560	1253974	2986	0	0.0762175	1.49679	0.432901	0.23162	1.12537	1.04277	0.792865
TGME49_209480	Ib	1254739	1256052	1314	0	0	0	3.19718	0.263173	0.426224	0.24304	0.766701
TGME49_209485	Ib	1256192	1260017	2892	14.0794	15.4242	11.2044	12.5152	25.7683	17.8165	28.711	24.0714
TGME49_209490	Ib	1259626	1265449	3134	70.0296	71.6741	42.4266	43.2049	82.3696	84.4376	156.875	123.407
TGME49_209500	Ib	1269156	1281821	11796	25.4524	32.4901	21.5021	20.8208	19.1579	19.0864	35.2222	28.6152
TGME49_209510	Ib	1283562	1285790	2229	0.200739	0	0	0.28996	0.465423	1.00504	2.29236	1.92088
TGME49_209515	Ib	1289381	1289950	570	0	0	0	0	1.21336	0.982558	1.96095	1.23721
TGME49_209520	Ib	1291902	1307643	9489	11.2699	12.1839	10.8921	11.2386	7.87172	10.1518	13.9669	11.1425
TGME49_209530	Ib	1307811	1311306	2471	15.935	16.5785	9.04372	10.7241	13.295	9.0661	15.4443	12.4351
TGME49_209540	Ib	1313245	1320620	5297	7.1801	5.24172	6.96104	5.36872	5.0595	4.96937	5.75767	7.00856
TGME49_209550	Ib	1321253	1329680	4499	10.4428	9.56071	11.6727	12.0673	8.1091	7.78031	11.1089	8.60997
TGME49_209560	Ib	1332258	1333697	1440	0	0.316091	0	0	0	0.388929	0.110887	0.0699614
TGME49_209570	Ib	1339993	1343567	1972	34.9426	41.4316	35.6963	42.4435	44.629	49.8429	54.2515	53.6418
TGME49_209580	Ib	1346464	1353246	4386	26.5755	25.0624	24.2016	16.9464	18.9225	25.4108	26.9588	25.5421
TGME49_209583	Ib	1351850	1353418	1177	14.6361	12.1817	8.5439	12.6299	15.4248	16.8922	17.2294	16.3913
TGME49_209585	Ib	1353484	1354819	1061	0	0.429002	1.05311	2.43665	1.30371	0.527859	1.58022	2.56371
TGME49_209590	Ib	1354932	1356774	1746	224.108	224.196	225.582	207.112	295.898	277.303	209.108	227.483
TGME49_209600	Ib	1356135	1359012	2409	619.071	614.925	540.819	532.699	787.006	810.794	687.726	709.038
TGME49_209610	Ib	1359382	1361738	2140	123.675	98.0531	103.903	88.6427	147.05	167.625	149.94	144.291
TGME49_209620	Ib	1362589	1366586	3538	5.75434	4.24552	9.15862	5.84575	8.06366	5.22383	9.20695	7.77367
TGME49_209630	Ib	1365714	1370002	3447	19.4711	20.9957	26.9046	20.344	21.1177	24.4528	23.5092	25.0473
TGME49_209640	Ib	1369829	1372849	3021	8.81268	9.64281	8.87668	8.77166	6.6964	9.17672	13.1875	12.0553
TGME49_209650	Ib	1374020	1392506	14580	6.79763	7.72666	5.05797	5.98446	5.11124	4.12937	5.569	5.24797
TGME49_209670	Ib	1392659	1394219	1561	12.7555	11.8094	12.8843	10.1441	12.0734	9.8665	18.0545	16.3605
TGME49_209680	Ib	1394230	1400462	2143	37.2699	41.3116	52.661	41.9219	40.1803	41.4229	45.042	46.8699
TGME49_209690	Ib	1401572	1404287	2085	70.1751	64.7281	93.2466	104.465	79.8595	68.4963	75.6266	75.4738
TGME49_209700	Ib	1404968	1407036	1812	105.441	81.6393	94.9626	106.115	124.335	96.1248	121.476	112.809
TGME49_209705	Ib	1407146	1408478	883	4.56061	0.515482	12.654	11.7114	10.3782	8.87974	12.6585	11.8087
TGME49_209710	Ib	1408566	1410953	1804	106.653	84.7768	105.913	118.946	106.771	95.3092	83.6448	83.2091
TGME49_209720	Ib	1411083	1413173	1248	257.784	262.051	392.148	354.234	328.491	343.305	224.674	240.64
TGME49_209730	Ib	1413876	1423060	5444	20.5066	26.9641	19.4982	21.4886	18.2623	21.2954	19.1091	21.4665
TGME49_209740	Ib	1423224	1425885	2662	27.146	34.0267	35.2583	34.3555	31.3073	30.7169	38.8696	37.9968
TGME49_209755	Ib	1428283	1433355	5073	0.705613	1.52531	5.72662	2.9303	4.49899	1.9872	19.3734	21.2789
TGME49_209770	Ib	1433970	1448540	4471	8.55664	11.7076	16.9939	18.9372	11.2924	11.6496	9.14279	9.05821
TGME49_209780	Ib	1450898	1451594	697	7.06157	5.87738	4.00772	4.63645	6.94595	6.82998	6.30004	6.57658
TGME49_209790	Ib	1451837	1459061	2516	31.0332	21.7997	24.8695	34.1656	22.3346	15.9158	17.2624	19.6003
TGME49_209800	Ib	1460356	1465112	4757	113.719	121.711	132.241	124.183	99.5555	111.67	138.547	133.878
TGME49_209810	Ib	1464226	1465239	1014	2.86825	2.69332	6.61155	8.60487	17.0517	25.9593	26.0617	26.5771
TGME49_209820	Ib	1466390	1472130	2759	16.0555	12.3733	19.0343	23.5431	16.6074	15.0215	12.6746	14.3321
TGME49_209830	Ib	1474352	1481346	1965	2.96021	7.52827	11.6569	7.56508	9.85512	11.9707	6.54149	8.94652
TGME49_209850	Ib	1484750	1492821	6623	53.2369	72.2995	69.6763	75.5326	56.4948	49.1309	42.5292	50.57
TGME49_209860	Ib	1493304	1498764	1276	42.255	46.7299	44.2212	39.5087	47.5623	41.6971	30.0334	37.4239
TGME49_209870	Ib	1500540	1506996	2883	38.8781	37.4967	38.9504	34.0759	40.2424	39.8238	45.5549	44.0823
TGME49_209880	Ib	1507992	1532901	15488	20.3818	24.4366	16.16	15.8158	20.6418	17.8815	19.8514	19.1921
TGME49_209890	Ib	1533286	1540273	5713	109.062	105.726	90.945	88.8649	97.0602	86.8566	117.11	110.77
TGME49_209900	Ib	1540953	1544290	1599	65.62	62.7674	87.3477	82.6596	67.6912	65.1475	41.2425	45.5524
TGME49_209910	Ib	1546014	1547673	1119	2288.42	1940.68	2861.78	2677.12	2756.74	2987.73	2228.92	2309.07
TGME49_209920	Ib	1549005	1553166	4162	0.107508	0.32809	1.34233	0.310582	0.664698	1.21108	1.2277	1.77913
TGME49_209930	Ib	1553578	1556192	2462	25.1712	23.8493	25.8688	28.2208	34.1314	35.1458	51.2369	43.0067
TGME49_209940	Ib	1557623	1564401	1569	43.0621	39.744	47.0014	56.8466	42.5374	54.0783	52.0046	47.9002
TGME49_209945	Ib	1566723	1566899	177	557.413	390.881	400.858	523.995	734.6	795.789	652.693	755.584
TGME49_209950	Ib	1569468	1574956	2400	500.861	526.196	525.388	550.854	333.418	366.838	397.896	368.452
TGME49_209960	Ib	1576674	1594111	8433	26.5295	25.935	21.0671	24.4871	19.1911	17.4333	28.3076	24.0721
TGME49_209970	Ib	1595186	1611439	7110	17.5266	22.0543	19.4869	23.7257	14.0075	13.7455	17.6633	14.0631
TGME49_209985	Ib	1612260	1614655	2396	16.994	18.0473	40.1053	36.4163	30.7418	39.0358	123.224	123.198
TGME49_210095	Ib	1616192	1617648	1457	1.84261	2.49922	9.20262	7.98475	4.50952	2.30635	13.3704	16.18
TGME49_210100	Ib	1618836	1619225	390	1.1473	0	5.73001	0	0	0	0.409429	1.93739
TGME49_321710	Ib	1619972	1621907	999	1.34368	4.10064	7.82929	11.6454	11.25	10.0911	20.4592	23.2953
TGME49_321700	Ib	1623393	1625238	986	0.6807	0	1.13322	1.63875	3.68255	1.98804	3.64375	5.15983
TGME49_321690	Ib	1625264	1637015	5552	31.7936	32.7523	38.6404	41.792	25.8796	22.596	32.0822	28.3797
TGME49_321685	Ib	1637013	1639170	714	69.2478	101.362	94.6776	79.6586	54.4867	85.1069	60.494	59.7553
TGME49_321680	Ib	1639104	1643349	1960	737.146	885.028	986.234	989.267	768.719	669.355	577.609	620.093
TGME49_321660	Ib	1644029	1648251	3686	14.4455	17.1646	29.1009	28.7566	20.5459	28.5651	17.5879	17.3966
TGME49_321650	Ib	1649662	1665176	6689	55.287	54.9485	44.35	46.1382	44.9516	44.8783	45.9171	41.9756
TGME49_321640	Ib	1665246	1675488	4564	30.735	40.5405	50.3102	41.2094	28.4512	24.7265	27.0444	25.1309
TGME49_321630	Ib	1677447	1686758	2880	61.524	62.9811	33.7533	45.5567	72.2837	64.7567	56.4693	58.9425
TGME49_321620	Ib	1689534	1701065	3931	229.699	250.859	220.571	215.714	159.621	185.356	191.341	183.011
TGME49_321610	Ib	1702668	1710306	3029	15.2153	13.2238	10.3288	14.1896	12.1587	12.5731	13.9434	12.9049
TGME49_321600	Ib	1712984	1720874	4717	53.7847	67.3541	37.9004	42.202	73.3112	71.4766	57.7337	62.4287
TGME49_321590	Ib	1721913	1724763	2070	168.603	144.467	205.118	223.246	166.055	183.439	190.957	194.651
TGME49_321580	Ib	1724819	1726721	1108	156.687	181.575	154.796	165.08	175.245	210.527	127.468	147.98
TGME49_321570	Ib	1726252	1727895	1550	272.51	315.389	229.958	278.752	311.674	338.926	245.903	271.685
TGME49_321560	Ib	1727869	1737820	3260	55.9995	68.3454	57.5813	75.5363	53.8338	52.9994	58.8504	56.0739
TGME49_321550	Ib	1738313	1741499	2991	74.2753	92.3733	89.6571	96.4836	67.2888	62.0726	63.1823	66.9946
TGME49_321540	Ib	1741504	1752034	4650	49.8446	69.9886	49.8603	53.3736	55.6269	54.5605	58.3424	61.8983
TGME49_321530	Ib	1751619	1757364	3767	198.601	213.025	161.211	163.511	169.324	168.077	306.617	266.303
TGME49_321520	Ib	1757437	1760598	1618	1072.16	1306.44	1290.69	1259.89	1254.15	1131.71	787.137	856.421
TGME49_321510	Ib	1762381	1763475	661	68.0309	70.9268	79.4486	59.1565	52.0545	37.2807	65.103	55.9353
TGME49_321500	Ib	1762941	1770724	5706	420.04	454.054	419.448	443.737	327.052	354.281	398.984	379.919
TGME49_321490	Ib	1768331	1772882	4552	58.6832	55.4964	77.3211	64.1778	58.04	65.0243	86.679	74.3411
TGME49_321480	Ib	1773337	1776209	2873	1.71316	2.37646	6.22264	2.69957	11.9161	9.94186	9.6151	10.8354
TGME49_321470	Ib	1781130	1782641	1512	0.591861	0	2.95596	4.70207	1.37226	0.740818	1.47849	1.93227
TGME49_321450	Ib	1783628	1804967	18294	21.915	27.7671	21.6214	21.8691	21.0011	21.8892	31.7801	28.2728
TGME49_321460	Ib	1783712	1785911	1747	16.648	11.0731	16.949	24.7874	39.4899	35.5847	58.5423	53.2556
TGME49_321440	Ib	1805187	1817056	5952	77.9198	87.4093	70.9609	72.9718	66.2626	71.4658	92.9171	87.5167
TGME49_321430	Ib	1818057	1821120	3064	10.2224	6.09073	8.02276	8.43761	6.09455	6.7631	7.34808	7.23361
TGME49_321420	Ib	1821922	1825810	3889	55.1111	69.9903	53.7271	44.6226	52.7294	62.3567	59.5146	55.4885
TGME49_321410	Ib	1825226	1841085	9849	56.6748	63.0834	57.4048	57.7483	47.9968	55.1017	52.5368	50.5359
TGME49_321400	Ib	1839813	1841087	1275	229.514	218.482	261.154	241.8	232.438	267.071	215.283	210.931
TGME49_321390	Ib	1841425	1843283	1859	2.88831	1.95878	7.2126	4.17206	9.95201	8.43552	13.8719	10.3508
TGME49_321380	Ib	1844524	1844596	73	0	12.4704	0	0	0	7.67203	2.18736	10.3505
TGME49_321370	Ib	1845495	1854787	8316	10.5459	13.8478	10.3459	6.99482	8.44147	7.98063	9.53341	8.80727
TGME49_321360	Ib	1855756	1868688	7808	58.481	55.5555	33.6293	32.9038	44.6212	44.0056	49.6845	51.1206
TGME49_321350	Ib	1864394	1864480	87	15.4292	10.4637	0	7.42898	3.97482	0	9.17686	17.9487
TGME49_321340	Ib	1870117	1885522	11497	11.0334	14.4901	8.94115	11.2433	8.88811	7.8185	12.6317	10.2041
TGME49_321310	Ib	1886586	1894139	4035	22.4555	22.6739	22.4301	21.6241	18.6831	18.8074	23.0118	21.4597
TGME49_321320	Ib	1890801	1890872	72	12.4291	0	0	0	0	0	0	0
TGME49_321300	Ib	1894345	1901903	4308	19.2149	19.0183	21.7868	21.454	18.3821	18.0706	25.7048	24.0052
TGME49_321290	Ib	1902389	1909458	2502	37.5555	39.8411	41.5323	50.7602	45.9558	29.2117	40.3342	44.0707
TGME49_200700	X	12198	12617	420	28.2318	35.7634	53.2072	21.544	33.3459	36.0037	25.0922	35.5004
TGME49_200590	X	71896	76299	1564	73.5255	55.2957	52.5098	53.5157	90.4322	90.7767	114.857	108.957
TGME49_200595	X	78446	81018	381	5.87201	2.38935	14.6634	17.812	107.101	57.3288	108.338	136.97
TGME49_200600	X	81517	81883	367	0	0	0	0	0.942259	0	0	0.549016
TGME49_228780	X	137205	139809	1140	97.5356	96.624	38.2252	56.6948	75.532	71.9724	109.393	103.661
TGME49_228770	X	144785	152582	3845	33.1658	45.6946	36.906	47.7387	51.714	43.552	37.3757	42.8
TGME49_228760	X	153990	157048	3059	281.574	284.947	292.396	289.038	295.842	358.664	348.091	335.991
TGME49_228750	X	161917	172790	6402	32.1502	37.3266	21.2929	22.8666	20.1749	19.7271	35.355	28.2862
TGME49_228730	X	176950	184155	4136	15.903	20.0843	16.7495	12.3451	10.0749	10.7651	15.5778	13.5065
TGME49_228720	X	185506	187851	1401	40.2415	38.337	25.92	35.5223	38.7523	29.3821	25.0743	30.7411
TGME49_228710	X	189633	193505	3873	9.8778	8.69678	6.63545	8.01018	7.32154	9.39938	6.84391	7.01023
TGME49_228690	X	195963	226771	20343	8.43513	10.9748	12.4132	8.80062	7.33503	7.94262	8.15538	7.20063
TGME49_228680	X	228811	233183	1980	2.93778	1.83907	2.25728	4.89637	7.42267	8.20287	13.5887	10.4561
TGME49_228670	X	235781	244486	7508	16.0611	21.6734	8.63165	9.85666	9.37295	8.91409	12.5585	11.6873
TGME49_228660	X	249292	266504	10638	18.2546	23.4474	18.6435	19.047	13.1978	13.5566	18.635	16.0331
TGME49_228640	X	266634	267104	471	5.69996	14.9791	0	6.86116	5.87361	8.32358	10.34	7.37937
TGME49_228630	X	268760	272341	2027	148.56	153.033	182.183	149.225	110.379	113.144	117.651	109.84
TGME49_228620	X	273098	274248	916	0	0	0	0.705591	1.69884	1.83425	2.00468	2.03469
TGME49_228510	X	278224	284834	2880	0	0	0	0	0.960581	0.583394	1.10887	0.734595
TGME49_228500	X	286338	289311	936	0.478042	0	10.7438	7.2504	2.95563	6.2827	10.4063	7.80339
TGME49_228490	X	290158	294322	1648	97.7433	115.45	128.821	147.069	109.639	103.821	94.5662	95.3955
TGME49_228480	X	294335	294955	621	27.38	29.3186	23.3906	59.8446	50.6741	54.5628	44.0977	42.5041
TGME49_228470	X	295089	298042	1341	2912.58	3298.38	3145.83	3195.22	3484.52	3161.97	2522.63	2998.29
TGME49_228460	X	299236	309551	3576	35.6606	48.6865	33.2768	41.2084	40.7602	32.1062	34.1145	35.0183
TGME49_228440	X	310925	312421	1215	0	0	3.21871	14.3627	1.42308	0.921906	1.97133	1.86564
TGME49_228430	X	312688	315197	1734	0	0	3.54408	7.08195	0.598285	0.645973	1.19712	1.22009
TGME49_228420	X	316970	319970	1002	0	0.454262	3.34537	3.22516	1.55303	1.67682	2.23102	1.70924
TGME49_228410	X	323835	328812	3375	2.3201	2.96704	2.97961	5.17057	7.01864	6.7207	12.0172	8.58194
TGME49_228400	X	329790	338212	2199	89.1231	99.3551	73.169	85.5296	66.0481	81.5001	84.486	85.2136
TGME49_228395	X	344001	350935	6219	2.15845	3.22038	1.25767	1.66283	1.50134	1.80112	4.05677	3.0293
TGME49_228390	X	351713	364050	8890	10.318	10.4449	8.54667	9.23316	7.23515	8.34732	13.6417	10.3181
TGME49_228380	X	364588	370491	5904	9.3976	7.70953	7.94864	7.7725	7.7315	5.78651	12.1164	9.80313
TGME49_228370	X	371435	376485	2555	55.8652	39.0146	39.3588	39.4623	54.2737	53.2658	45.5909	43.2748
TGME49_228360	X	376763	379770	2128	130.365	111.44	172.223	159.606	118.466	117.117	92.7825	94.5426
TGME49_228350	X	381740	397667	7233	10.9186	13.0579	10.5046	11.5718	8.7014	8.32383	8.25651	9.38777
TGME49_228340	X	398256	406213	7323	6.47677	8.8262	9.46003	7.3255	6.02085	5.88891	8.99453	7.41517
TGME49_228330	X	406774	419257	5621	13.4529	19.232	19.1824	20.1221	12.8271	11.3088	15.7092	14.2666
TGME49_228320	X	419456	424279	2974	14.4435	18.6721	20.2882	17.3859	14.7091	14.218	25.4496	22.4761
TGME49_228310	X	426284	427725	922	1.9412	0	0	0	2.25038	1.21488	4.67602	2.40388
TGME49_228300	X	430587	435987	1327	50.4094	46.649	62.309	47.0008	43.5193	44.1041	33.211	31.3166
TGME49_228290	X	436524	440084	3561	96.2495	110.821	144.023	124.327	82.4465	91.2985	65.9157	74.5469
TGME49_228280	X	441916	444570	2233	23.4444	30.1681	26.0198	25.0366	24.7006	21.5696	29.4971	26.5058
TGME49_228270	X	444643	448680	3272	8.75202	12.6591	8.53722	12.1482	8.45499	6.50434	7.51538	8.34406
TGME49_228250	X	448761	456934	4825	34.0338	46.6019	35.1995	41.7932	26.1238	24.2595	36.883	33.4806
TGME49_228240	X	458716	463930	4604	4.42199	2.86706	2.06288	3.93071	10.3277	15.2666	49.0581	38.8952
TGME49_228230	X	465840	475852	9242	161.39	175.405	120.174	146.894	104.431	128.41	185.896	163.952
TGME49_228220	X	476959	485061	1257	0	0.362109	0	1.02836	0.962873	0.445551	1.27031	1.12205
TGME49_228210	X	486595	494064	2120	184.572	189.583	215.565	219.353	185.22	196.813	154.292	156.13
TGME49_228200	X	494810	501131	4885	61.5526	63.2673	64.5022	63.1106	54.3667	59.5026	74.2002	67.737
TGME49_228190	X	504299	508703	3214	172.909	158.545	264.563	283.243	167.74	176.173	152.598	149.095
TGME49_228180	X	508144	513743	3151	54.5286	46.7305	55.8499	53.843	52.8975	49.1451	57.9217	55.8715
TGME49_228175	X	517141	520303	2923	22.8086	29.0419	24.847	25.2072	22.5965	22.5135	36.4368	29.7098
TGME49_228170	X	519356	528262	7888	283.115	276.72	160.421	195.584	159.555	184.426	322.169	266.242
TGME49_228160	X	528229	538368	9114	63.8474	56.8339	45.361	53.151	55.0547	60.1906	108.142	99.3849
TGME49_228150	X	540867	550486	8284	77.3742	82.0615	65.7544	71.5447	44.3741	49.049	76.1282	64.4794
TGME49_228145	X	548725	552292	3007	100.441	95.8175	131.355	131.22	72.5083	84.2788	111.886	89.5879
TGME49_228140	X	552312	553217	402	85.705	53.2165	52.8102	61.095	48.6025	41.0988	84.8038	69.1678
TGME49_228130	X	553272	558228	4113	73.9762	88.3118	86.389	98.056	74.9547	84.1517	94.009	93.286
TGME49_228120	X	558457	578032	14354	67.5036	65.2124	61.0286	68.3289	52.4471	55.4635	70.8614	63.2548
TGME49_228110	X	579226	581517	1060	94.3438	80.5137	90.126	79.2658	114.345	96.4251	105.523	94.1866
TGME49_228100	X	582428	593544	5691	43.7934	51.7876	49.4768	52.8096	45.087	44.8755	32.7997	34.98
TGME49_228080	X	594064	604913	4656	40.891	38.3708	36.9571	32.205	41.3693	36.3869	35.3238	34.0792
TGME49_228075	X	602493	602564	72	0	0	0	0	0	0	1.10887	2.09884
TGME49_228070	X	609072	639377	12255	6.68158	9.24827	5.65286	5.59038	5.03688	4.68429	7.93501	6.34226
TGME49_228065	X	643158	645323	1594	6.45626	4.85439	16.8234	21.2872	10.5218	10.0136	18.4821	15.2634
TGME49_228060	X	645970	650387	4418	9.92526	11.9511	13.91	13.8978	10.332	8.87372	10.7524	11.1508
TGME49_228050	X	651596	654168	2573	0.695604	0	0.868521	1.75836	1.88159	0.87067	3.78559	2.81912
TGME49_228040	X	656735	661122	4388	8.36159	11.3067	13.7505	14.1401	16.2738	14.3588	16.5936	17.2193
TGME49_228030	X	662492	668114	5623	5.96808	6.47584	6.55746	4.94252	6.5804	6.37448	7.92282	7.03223
TGME49_228020	X	667461	669654	2194	10.0951	10.5805	10.1855	12.078	8.19602	7.53041	14.2283	12.8341
TGME49_228010	X	668533	676919	3571	27.5034	33.8415	25.6575	33.6645	24.0159	26.113	33.894	31.7101
TGME49_228000	X	678141	681484	1364	140.073	117.797	163.015	160.396	120.425	111.273	114.373	110.383
TGME49_227995	X	681684	683240	621	6.845	5.13075	5.39784	13.5301	5.56858	8.56772	10.928	8.03036
TGME49_227990	X	683377	688905	2718	20.0018	22.2729	21.788	19.3801	15.7764	24.7266	18.6525	19.2
TGME49_227980	X	694701	698591	2909	21.8417	20.8105	24.0064	25.7729	19.555	25.5097	32.6875	32.3636
TGME49_227970	X	699142	702049	2351	306.514	348.88	428.453	462.129	311.243	290.63	269.468	300.112
TGME49_227960	X	702122	706405	3033	167.073	185.94	167.99	160.888	151.299	159.726	140.672	153.757
TGME49_227952	X	709786	716045	4350	85.4778	88.5752	61.0048	58.5404	76.6742	73.8376	85.1613	83.8842
TGME49_227948	X	715236	727810	6371	111.388	139.959	110.139	107.23	111.651	95.2037	82.4954	92.2134
TGME49_227940	X	727148	727777	630	132.814	131.133	169.376	131.829	148.478	146.237	73.8825	104.422
TGME49_227930	X	727876	735450	6321	34.0487	40.5412	26.692	29.8058	21.5002	24.0557	30.6168	29.9715
TGME49_227920	X	737705	739935	921	243.4	263.663	272.969	228.423	277.098	308.914	211.603	231.461
TGME49_227910	X	739343	742777	2043	364.112	403.371	424.408	390.229	440.767	415.863	325.412	340.721
TGME49_227900	X	744092	750891	6580	20.5023	28.5346	18.5093	24.6054	24.2802	22.0023	25.7959	26.1583
TGME49_227890	X	752966	754487	1522	26.7527	28.1117	30.0995	29.0887	28.4009	38.2694	50.2008	44.0178
TGME49_227880	X	756080	757203	795	7.59816	13.741	15.4602	2.84544	9.78705	9.51042	23.2988	18.2481
TGME49_227875	X	757837	758893	600	22.7452	20.4827	19.5537	22.0826	27.0884	35.4704	35.5282	26.2775
TGME49_227870	X	762980	764442	312	222.289	247.28	304.407	404.987	238.852	192.071	185.011	194.547
TGME49_227860	X	765221	770601	2196	41.3624	46.1182	50.3724	44.8834	39.9979	31.6244	34.1387	36.9763
TGME49_227850	X	771620	776501	2966	16.1419	22.559	21.0963	14.6	15.7398	13.2178	15.5586	16.8643
TGME49_227840	X	778054	785657	1842	131.902	147.399	94.6292	94.5622	146.246	140.927	110.396	117.316
TGME49_227830	X	785741	792813	5101	32.3678	36.9419	38.7711	34.0202	30.4388	23.7155	25.6373	28.4893
TGME49_227820	X	794587	804517	8007	19.4469	23.8187	19.6761	18.5251	16.0229	16.2275	22.6544	20.471
TGME49_227810	X	804734	808539	3806	323.359	251.624	200.513	199.449	285.842	328.221	261.521	265.573
TGME49_227800	X	810061	820835	5544	41.6051	52.0524	30.836	37.6554	35.5851	41.1659	55.7172	45.6294
TGME49_227790	X	822016	830427	3282	27.1986	23.7155	38.1302	32.9856	27.1843	34.4704	32.2809	25.5391
TGME49_227780	X	830673	855807	11672	11.0022	17.8605	19.2416	18.5502	14.147	10.4363	12.9143	10.979
TGME49_227660	X	857730	861155	3426	8.16271	12.7543	10.1103	14.2432	9.84132	8.50059	9.85749	11.777
TGME49_227650	X	862157	864750	1641	112.884	143.402	106.901	137.85	94.4073	91.2953	65.1943	76.4025
TGME49_227640	X	864848	866694	1847	38.6398	36.2264	28.1304	43.0414	27.5224	26.6839	27.9673	24.1089
TGME49_227630	X	867811	869259	471	46.0747	40.5885	686.78	880.287	573.779	768.742	2008.17	1595.98
TGME49_227620	X	869401	871807	2166	9619.08	9346.34	7944.5	7753.77	9566.11	8826.09	10945.8	11232.8
TGME49_227615	X	871922	875081	1277	20.4978	17.2872	20.9996	21.5103	13.6753	14.0343	57.0812	44.4159
TGME49_227610	X	875769	892600	10947	33.8845	34.3862	29.1408	31.4688	24.7503	27.3455	74.2959	52.8938
TGME49_227600	X	892916	896663	1900	1339.04	1351.02	1765.42	1688.6	1636.22	1461.6	1144.85	1323.65
TGME49_227590	X	897890	898950	529	0.845836	0.860436	0	2.44356	2.94166	3.70549	10.7156	8.66517
TGME49_227580	X	900279	906697	4115	124.23	106.188	91.3703	87.0138	108.701	134.741	157.291	129.315
TGME49_227570	X	908130	912880	2684	162.291	148.982	129.053	158.089	198.028	217.012	247.488	217.986
TGME49_227560	X	915482	922542	3449	62.0121	69.6151	77.2654	84.7957	58.5038	69.0127	96.9454	87.7607
TGME49_227450	X	923710	933203	8736	32.2422	37.2536	28.778	32.2569	22.3652	19.6495	46.4355	38.6037
TGME49_227440	X	931160	937802	4464	47.8119	43.5899	48.0581	47.1276	43.3036	36.0701	61.6675	57.7633
TGME49_227430	X	941450	947210	3258	19.914	19.4195	32.9238	42.2549	43.5711	51.8286	59.9893	66.0652
TGME49_227420	X	946912	952750	3666	40.2165	32.6541	41.1463	45.9265	32.4962	33.2277	38.0682	34.2685
TGME49_227410	X	952990	958541	5552	14.023	15.5768	10.6664	12.3979	10.6508	9.2805	13.7762	10.6968
TGME49_227400	X	959233	963692	2884	5.58533	5.20826	13.5601	12.4379	6.47493	7.7678	7.50218	7.66762
TGME49_227390	X	966387	971556	4234	20.8717	22.3608	16.4937	26.0269	20.7044	15.2118	18.3663	18.0122
TGME49_227380	X	972675	977397	4382	278.608	249.866	259.959	309.665	163.395	193.822	303.813	269.943
TGME49_227370	X	977454	985514	4344	0.824028	0.73347	33.5669	41.3622	17.4337	18.501	21.3197	17.8808
TGME49_227360	X	993006	997845	3316	1369.33	1406.49	1481.27	1549.34	1503.27	1383.93	1011.71	1210.85
TGME49_227350	X	1000190	1012419	7574	19.259	19.922	19.1782	18.9015	11.3915	13.421	15.622	12.5764
TGME49_227335	X	1015416	1016514	760	33.8529	27.2504	33.8146	48.4741	32.3058	44.5836	55.3618	48.8478
TGME49_227330	X	1016835	1017305	471	657.396	753.786	578.841	575.651	658.946	631.403	670.408	637.407
TGME49_227320	X	1019702	1029265	4475	18.9977	21.1565	31.2109	38.9237	20.0917	22.9655	27.9212	23.4695
TGME49_227310	X	1030867	1033988	3122	14.4754	18.6617	35.4317	33.848	13.901	15.607	28.0024	18.8614
TGME49_227300	X	1034033	1041685	7653	6.25596	5.62049	6.20508	9.24764	4.29268	3.65908	8.66928	7.91818
TGME49_227290	X	1041746	1047247	4332	119.867	118.626	181.712	175.903	122.733	140.144	179.066	156.314
TGME49_227280	X	1047283	1052338	5056	4560.67	4420.18	4532.83	4234.77	3750.14	3616.95	3276.72	3515.79
TGME49_227275	X	1052157	1053156	455	35.4024	40.5152	31.9243	49.717	58.5215	97.2409	114.406	87.7916
TGME49_227270	X	1053166	1056204	2051	46.3591	42.6098	65.9189	73.4241	58.7589	70.9971	88.7919	80.1633
TGME49_227260	X	1056658	1065416	4036	24.1129	20.4128	32.6679	33.1488	24.7618	23.0351	22.4522	24.0379
TGME49_227150	X	1065557	1070787	4192	105.244	99.6229	101.02	118.718	92.7217	106.08	119.358	124.645
TGME49_227140	X	1071592	1079593	4107	9.04263	6.81592	8.43387	8.18327	9.85139	9.06839	8.88393	8.56095
TGME49_227130	X	1079639	1080205	567	3.15659	8.0277	0	3.41969	3.35441	6.42042	3.80184	5.24156
TGME49_227115	X	1080206	1086234	3604	17.5676	13.1348	11.1611	17.2161	14.9684	25.4854	20.3363	16.4227
TGME49_227100	X	1087519	1089620	1497	0.597792	0	3.73197	3.02221	3.23402	2.99296	4.05327	4.84543
TGME49_227090	X	1090642	1098780	3648	0.367966	0.998181	2.14404	2.12606	4.64491	3.60783	4.15827	3.93533
TGME49_227080	X	1100024	1103002	2979	11.5654	11.6123	14.2529	10.414	19.8501	17.6722	17.5275	18.1266
TGME49_227070	X	1103498	1105110	1279	1.04952	1.42352	0	0	0.811124	0	2.37206	3.07196
TGME49_227060	X	1105872	1119439	4932	26.1283	25.6564	30.5845	25.292	20.684	17.4876	28.5555	26.3607
TGME49_227050	X	1120862	1129035	8118	30.5078	29.0439	24.4309	23.8051	25.793	25.9746	39.3096	34.7915
TGME49_227040	X	1124513	1125401	889	21.3909	22.7841	8.79805	9.45127	11.8641	21.4195	36.0127	33.6004
TGME49_227030	X	1128803	1131333	1471	292.468	241.51	289.403	296.359	354.507	329.334	275.121	281.448
TGME49_227020	X	1131265	1136512	2633	67.8903	72.606	93.3602	74.8682	85.9597	82.8495	82.3251	92.1546
TGME49_227015	X	1136563	1138205	351	5.09911	18.155	0	9.20686	10.3447	11.9671	29.3424	23.8228
TGME49_227010	X	1138273	1142123	3360	21.8397	17.9494	16.2947	13.465	19.4518	23.7525	43.2935	30.5981
TGME49_227000	X	1143506	1156405	5774	63.8933	72.5246	47.7013	52.834	52.4044	60.8168	52.6405	50.1454
TGME49_226990	X	1160877	1163021	2145	45.892	57.7186	20.055	26.9677	56.6675	59.5307	78.1638	66.5289
TGME49_226985	X	1169069	1170524	983	6.60018	3.70434	6.82005	7.88999	10.2019	13.389	7.95951	9.32629
TGME49_226980	X	1172096	1177407	1757	213.282	235.228	295.714	230.829	211.776	223.29	188.986	192.257
TGME49_226970	X	1180075	1184830	2366	1298.75	1499.41	1458.56	1430.59	1441.99	1304.51	949.932	1068.95
TGME49_226960	X	1185778	1198512	5168	324.243	355.602	368.415	382.378	339.62	337.411	367.956	353.035
TGME49_226950	X	1198979	1212328	9253	16.3447	19.3323	13.2227	16.1353	13.5663	13.1041	31.511	24.3233
TGME49_226940	X	1213280	1219122	4528	26.7302	29.3529	20.4815	23.3378	18.8255	21.8927	20.3652	22.4495
TGME49_226930	X	1218839	1219679	841	3.72429	5.41226	3.9858	8.06941	2.67272	6.32646	10.5376	6.52863
TGME49_226925	X	1220616	1223108	477	7.03533	0.954236	9.36983	10.1623	2.89987	2.93532	14.227	7.70896
TGME49_226920	X	1223136	1228341	4558	43.4391	47.4344	40.2031	42.5398	34.9375	29.3054	41.5484	39.1882
TGME49_226910	X	1228584	1248504	9018	22.4021	20.0128	17.1605	17.9534	17.2943	17.4514	19.8313	18.0252
TGME49_226900	X	1249003	1255536	4792	26.7983	25.2662	29.8458	31.0213	27.2058	22.0307	29.7896	25.7643
TGME49_226890	X	1258271	1266074	7462	11.7528	15.6461	10.7812	12.7324	8.36485	8.70635	10.0146	9.4912
TGME49_226880	X	1268993	1270075	1083	0.413155	0.420287	2.06344	1.19358	0.798266	6.20563	3.98088	2.60466
TGME49_226870	X	1273483	1281576	1386	78.9328	64.3676	111.251	98.6269	77.0959	83.6451	107.2	94.239
TGME49_226860	X	1283041	1286787	3747	279.072	256.314	188.462	200.348	282.406	277.114	410.231	376.494
TGME49_226850	X	1286214	1298163	7048	23.9341	26.2847	23.4631	27.465	30.4938	29.7193	47.577	35.292
TGME49_226840	X	1299418	1306694	3206	32.3094	44.0121	43.5649	42.3355	34.0847	28.9113	42.0859	38.8712
TGME49_226830	X	1306850	1317116	8949	102.249	133.159	111.997	115.448	84.24	83.9868	85.8964	90.7871
TGME49_226825	X	1314833	1317858	3026	26.4683	19.1033	26.586	25.7375	31.4268	26.4667	47.3597	38.6032
TGME49_226820	X	1318736	1319209	474	8.49583	9.60276	12.9651	13.6355	10.2138	20.0865	12.9696	11.2647
TGME49_226810	X	1321917	1350881	22656	7.30735	8.21702	7.3484	6.57561	4.54851	4.70918	6.62856	5.51836
TGME49_226800	X	1352542	1357607	5066	5.91768	8.08633	4.63174	7.20828	5.08543	4.47737	9.59767	7.0895
TGME49_226790	X	1357783	1363561	5779	14.4787	16.934	14.3077	17.5588	13.0449	12.5986	19.0237	18.3306
TGME49_226780	X	1365652	1371416	5765	14.3587	14.8434	11.8228	12.3883	12.4167	13.9407	15.5384	15.3345
TGME49_226755	X	1371691	1387379	12564	35.471	44.0897	26.9466	29.7337	30.0835	36.3744	41.1267	37.1658
TGME49_226740	X	1390818	1399849	4035	126.361	121.604	75.4593	92.9838	86.2166	109.305	163.457	125.275
TGME49_226730	X	1400416	1408916	4497	137.955	149.396	150.819	145.16	134.879	143.72	142.456	135.592
TGME49_226720	X	1410263	1415117	3451	32.3495	48.0099	45.3287	51.0352	43.3389	32.62	49.7633	49.3067
TGME49_226710	X	1415442	1421109	3149	329.298	342.643	333.715	305.715	326.536	341.21	300.669	302.313
TGME49_226705	X	1422891	1425399	1675	84.1467	92.9364	74.0454	80.2596	78.2457	65.7023	90.5156	78.4604
TGME49_226700	X	1425864	1430286	3484	20.2918	23.6469	16.9976	18.0873	25.8066	26.2025	35.8403	31.5333
TGME49_226690	X	1433028	1441875	4081	29.6032	40.0965	26.8318	28.6656	33.0472	37.0536	29.9713	29.9567
TGME49_226680	X	1442165	1449293	4252	79.0819	89.0109	53.3449	63.0057	67.7873	73.2343	63.8597	63.9604
TGME49_226670	X	1450308	1453211	2904	18.1043	25.6269	16.9296	19.1404	20.065	22.95	23.4787	23.9719
TGME49_226660	X	1453119	1474292	13036	17.4022	22.7655	12.8569	13.7584	13.5289	12.9532	19.4391	16.6388
TGME49_226650	X	1476593	1477368	776	98.0232	68.6275	92.8727	72.8777	88.9032	94.9068	75.6204	79.5829
TGME49_226640	X	1477423	1479981	393	131.502	92.6556	160.637	126.633	160.146	165.31	151.958	139.966
TGME49_226620	X	1481930	1493491	11235	9.21976	9.76379	5.17154	5.58017	6.07897	6.7546	8.29299	6.91806
TGME49_226610	X	1502133	1509456	3188	0.701768	0.713881	1.75243	0.405471	3.905	3.16219	2.32905	2.98631
TGME49_226600	X	1509656	1516438	3671	38.9429	34.0975	35.6116	32.9235	38.4808	45.8451	41.7354	38.3658
TGME49_226590	X	1516802	1523526	5218	215.706	243.331	212.528	199.978	209.222	215.684	203.957	190.889
TGME49_226580	X	1523061	1529501	2686	203.483	185.305	247.099	232.204	249.701	254.695	303.096	288.393
TGME49_226570	X	1529576	1533456	2784	690.216	702.621	912.865	913.881	796.143	780.139	584.021	621.185
TGME49_226565	X	1533937	1536246	393	19.3552	9.26556	8.5294	23.8465	28.1575	22.0888	35.5516	34.2224
TGME49_226560	X	1535990	1539472	1758	67.7024	62.5277	67.0538	69.8527	80.3544	76.9363	94.9617	85.7875
TGME49_226550	X	1540350	1542727	1914	103.796	124.613	122.885	126.462	84.4648	113.387	94.3966	98.7443
TGME49_226540	X	1542853	1547509	3163	86.9289	70.5853	42.9207	46.0782	88.1742	94.6415	151.625	128.343
TGME49_226532	X	1548895	1551149	1650	14.5081	8.68962	5.41746	14.1016	24.1018	25.1178	29.4194	24.4534
TGME49_226520	X	1551330	1554090	1697	102.699	76.3088	111.274	119.781	127.157	129.371	136.013	144.052
TGME49_226515	X	1554111	1556798	1940	4.61286	6.33485	12.095	18.157	14.884	14.0015	29.3428	21.8626
TGME49_226510	X	1559773	1572053	6859	28.2468	24.62	24.7613	26.9497	24.9311	27.4354	31.1137	28.8911
TGME49_226500	X	1574234	1576634	860	424.034	379.221	463.181	428	492.175	520.984	546.245	520.123
TGME49_226490	X	1577769	1579336	1299	0	0.350401	8.60163	5.97064	1.06485	2.15573	3.81062	2.83077
TGME49_226480	X	1583571	1604040	2652	15.691	15.447	24.4368	23.8837	12.9092	10.9815	9.60352	10.4277
TGME49_226470	X	1607574	1618477	10397	38.3022	34.8043	29.7688	27.0414	24.4631	24.1864	37.8652	34.5585
TGME49_226460	X	1617585	1624722	4127	29.9238	20.4038	34.1135	30.3037	23.2522	24.902	32.9647	26.4006
TGME49_226450	X	1626439	1627980	1542	0.580346	0.590364	2.89845	0.83829	2.2426	1.45281	1.44973	2.25401
TGME49_226440	X	1631436	1643620	6580	21.3523	23.3811	21.0565	22.7882	18.4204	19.5765	25.8566	23.7469
TGME49_226430	X	1643672	1645976	2305	406.002	377.96	420.764	414.711	359.911	387.667	405.22	354.813
TGME49_226420	X	1647516	1655622	3066	102.011	107.706	119.898	123.425	156.832	149.239	153.636	152.924
TGME49_226410	X	1655884	1658506	1597	906.942	1059.4	1565.83	1571.69	1188.35	1091.18	801.737	962.182
TGME49_226400	X	1659631	1664681	3308	62.9645	53.8692	75.4922	83.2324	61.1543	73.5627	93.5715	78.8779
TGME49_226390	X	1665301	1670079	4779	11.5162	13.7151	9.81979	18.1224	11.7947	13.3012	24.0903	19.3415
TGME49_226385	X	1670606	1671835	962	0.465122	3.31205	11.6149	5.71074	1.79734	0.873272	14.6897	9.52988
TGME49_226380	X	1674638	1678228	3591	303.656	299.898	276.615	285.634	232.513	266.85	505.578	421.48
TGME49_226370	X	1679038	1687438	4199	32.8739	33.2245	23.6829	24.3198	27.7125	32.8112	45.9562	37.9561
TGME49_226350	X	1687720	1694957	6635	9.57611	9.87861	10.1042	10.0333	8.88628	10.9311	14.2831	12.2002
TGME49_226340	X	1695939	1708798	6696	44.9051	50.4386	39.0472	39.4298	49.8108	48.6789	53.6193	51.6135
TGME49_226330	X	1709232	1714333	3450	10.4404	13.2593	8.74449	9.46064	8.7204	6.89927	6.43338	5.50444
TGME49_226320	X	1718603	1724516	4391	39.7923	41.2567	50.6384	49.751	41.8578	45.4067	57.0926	48.3762
TGME49_226310	X	1725362	1730426	4519	81.8851	74.3845	59.5888	67.2924	96.1898	109	98.0007	91.9274
TGME49_226300	X	1733007	1736025	1937	0.462	0	6.92216	4.33773	3.12424	4.62619	4.03934	4.08283
TGME49_226290	X	1736977	1744028	6429	113.863	108.323	79.1653	79.4707	132.832	141.212	128.718	126.522
TGME49_226280	X	1745448	1747918	1317	58.4365	45.6208	79.7503	62.3256	71.0261	77.396	74.6252	69.6108
TGME49_226270	X	1748200	1755085	3403	33.003	37.786	34.8044	46.2472	39.1741	31.4344	35.9661	33.9713
TGME49_226260	X	1755281	1758460	3180	93.8513	71.5677	78.3552	77.2334	68.455	80.3983	99.6729	103.754
TGME49_226250	X	1759627	1763948	3568	261.596	301.959	324.589	329.863	210.849	208.138	219.512	215.24
TGME49_226245	X	1768843	1771461	831	0	0	0	2.33329	0.832272	2.02187	0.0960755	1.27294
TGME49_226240	X	1773202	1775594	1335	68.3739	59.3256	74.4901	90.7755	77.3213	64.3962	54.6611	59.1261
TGME49_226230	X	1776214	1778566	2353	0.570481	0.773771	2.84918	1.3734	4.55592	2.38019	2.64659	2.67596
TGME49_226220	X	1780074	1788231	3744	82.2829	77.8678	52.5251	51.5296	80.7719	99.6257	64.9756	70.392
TGME49_226110	X	1790782	1795609	2461	0.999983	2.31192	5.44828	4.46463	4.42624	4.21011	7.59133	7.77792
TGME49_226100	X	1797047	1801551	3591	6.10551	6.59117	11.2015	11.9689	10.6892	8.49991	14.7849	12.9613
TGME49_226090	X	1801336	1810744	4347	15.3369	15.4446	12.852	14.1991	10.9383	10.2426	10.6341	12.2947
TGME49_226080	X	1811319	1819364	4504	15.5971	15.8663	18.606	16.6459	12.7452	14.9838	15.2622	12.6713
TGME49_226072	X	1820020	1827141	4063	100.161	114.549	66.5516	101.808	81.537	73.953	95.2052	94.0001
TGME49_226068	X	1828481	1835700	2616	130.676	156.334	86.9194	85.2373	116.525	112.825	139.992	139.775
TGME49_226060	X	1835459	1844954	5544	65.9791	64.2034	62.9821	65.6347	56.668	65.3098	89.7465	75.4948
TGME49_226050	X	1845001	1850313	3861	46.7032	46.6842	48.6183	49.6333	34.3928	31.5495	53.4946	49.6286
TGME49_226040	X	1850100	1853129	3030	74.2792	69.8529	57.7114	47.6742	140.663	131.789	96.9395	109.206
TGME49_226030	X	1853409	1857306	2672	382.725	339.675	386.808	359.927	343.674	367.748	326.078	325.591
TGME49_220025	X	1858502	1864032	3447	18.3678	20.9297	26.0942	26.1566	27.2875	27.2149	34.4879	33.4207
TGME49_226020	X	1862971	1869284	4503	330.592	297.787	234.364	249.96	262.333	271.758	390.453	331.911
TGME49_226010	X	1869838	1871206	1098	22.8206	27.9818	23.9142	33.2579	47.2417	39.7856	36.0656	42.5274
TGME49_226000	X	1872321	1875170	1290	249.218	188.243	384.144	391.801	269.677	282.417	214.636	240.03
TGME49_225990	X	1875344	1879775	3132	49.502	65.2528	77.2371	71.1944	45.2135	38.8929	29.5699	31.0243
TGME49_225980	X	1880223	1889538	6473	12.2006	15.1888	17.5207	17.9728	14.7181	13.1081	15.4423	14.1319
TGME49_225970	X	1889491	1891360	1870	10.2889	8.27583	8.96272	12.7882	6.10251	6.43917	11.0579	10.4246
TGME49_225960	X	1894502	1907861	11871	7.31233	12.7682	7.15346	5.93455	8.33134	9.71881	11.2451	9.3777
TGME49_225958	X	1909212	1911031	1301	0.687851	0	0	0.496788	1.19611	1.07621	0.981875	1.20026
TGME49_225955	X	1911036	1912543	1307	1.71173	2.08954	0	0	1.98437	0.857013	1.46605	1.38745
TGME49_225953	X	1913648	1915865	1997	0	0	0	0	0	0	0.479752	0.454031
TGME49_225950	X	1915005	1920395	4288	0.208697	0.10615	0.912018	1.65801	0.241937	0.391832	2.25291	2.06752
TGME49_225940	X	1920552	1923483	2357	122.92	126.876	103.107	129.292	145.469	138.529	150.091	135.687
TGME49_225930	X	1925742	1929561	2233	283.036	257.753	344.763	313.32	353.01	293.322	327.042	330.972
TGME49_225920	X	1930125	1939177	8409	21.6301	21.1644	17.9382	15.5259	20.7058	18.8817	28.8916	25.7822
TGME49_225910	X	1940382	1945450	4816	21.3689	22.1159	19.7207	26.7064	21.3977	22.4442	33.1556	30.761
TGME49_225905	X	1947193	1947923	405	11.6005	9.55297	5.51779	3.98964	6.8308	8.29716	22.0789	13.4326
TGME49_225900	X	1948495	1953189	4695	27.1137	33.6894	15.4692	20.0986	22.5384	23.3208	28.9426	24.2044
TGME49_225890	X	1954412	1964180	8617	15.9413	20.2838	14.6525	17.9263	14.3669	14.3313	19.8276	17.8469
TGME49_225880	X	1966905	1971814	2388	40.4726	36.5966	47.2582	41.9513	49.0186	46.5543	47.4753	41.0698
TGME49_225870	X	1978506	1987716	8434	79.4996	90.5592	53.1252	66.1724	52.5233	59.0339	94.4736	75.1044
TGME49_225860	X	1988754	1995651	5119	55.3736	59.7973	46.7109	34.6582	48.8753	51.6405	57.7072	60.1042
TGME49_225850	X	1998099	2009905	5615	42.2744	46.652	34.625	39.7116	40.8627	34.6109	69.6296	57.4504
TGME49_225840	X	2011994	2017135	4322	32.5595	30.3307	24.043	28.413	22.6432	33.2381	36.5573	33.5543
TGME49_225830	X	2018128	2022672	3596	58.2328	62.4024	46.6081	45.1131	51.2078	52.6417	58.7911	62.0548
TGME49_225820	X	2022983	2026773	3791	40.4839	31.5774	29.1791	25.4028	32.5194	34.1265	71.6463	65.1079
TGME49_225810	X	2026929	2031664	2322	98.7582	105.854	118.135	107.581	84.963	101.423	108.446	101.742
TGME49_225800	X	2031711	2036442	3325	38.1507	42.3001	49.0627	42.3753	30.1088	36.888	39.8113	34.5107
TGME49_225790	X	2038333	2041689	2021	185.643	148.083	103.94	82.1893	147.666	142.716	217.71	197.85
TGME49_225780	X	2041505	2047157	4654	46.581	51.5906	36.2527	43.4677	41.3871	45.3077	55.7361	51.8767
TGME49_225770	X	2048318	2060574	7445	15.7162	14.7953	15.7585	11.1554	9.12713	11.3591	15.6782	12.5034
TGME49_225745	X	2065974	2104375	36621	1.99159	2.48585	1.80016	1.90608	1.82248	1.89638	2.67939	2.14991
TGME49_225730	X	2104551	2108102	1696	216.732	221.413	274.067	272.095	223.777	247.337	276.705	250.733
TGME49_225720	X	2108242	2111483	1619	40.6268	34.7212	40.0287	35.5297	30.2236	38.3981	45.3685	34.3178
TGME49_225710	X	2111764	2115425	1676	35.5074	29.0592	50.0008	45.1191	32.3938	41.4363	44.3972	36.4267
TGME49_225690	X	2117358	2123952	6595	94.8153	107.081	62.6869	67.5722	71.0495	73.4997	97.1865	86.8281
TGME49_225680	X	2125899	2130984	1287	91.2625	85.7645	94.1979	84.8705	126.42	104.005	102.792	121.175
TGME49_225590	X	2134198	2136782	1789	0	0	0	0.361275	0.193297	0	0.714041	0.760229
TGME49_225580	X	2144604	2147320	1847	79.3389	72.2063	83.4838	96.9307	89.9628	94.3032	105.515	103.035
TGME49_225570	X	2148091	2150244	2154	0	0.422628	1.03747	1.20023	1.76597	2.21007	7.56133	5.70605
TGME49_225560	X	2151924	2159860	5193	384.289	377.205	199.888	207.662	341.847	373.264	402.73	370.948
TGME49_225555	X	2163590	2164680	1091	1008.5	834.827	1120.42	1035.83	1067.54	1143.73	1090.81	1063.08
TGME49_225550	X	2164844	2170931	3643	120.306	119.321	118.391	139.004	123.591	124.372	144.775	138.658
TGME49_225540	X	2170770	2174623	2881	183.265	174.659	155.522	160.963	222.357	226.278	427.46	371.279
TGME49_225530	X	2174759	2184912	6695	66.3652	64.5873	81.9447	77.9544	62.4729	62.0288	56.3701	55.7744
TGME49_225520	X	2186566	2188593	2028	3.64047	5.7233	1.65289	3.98374	3.23983	4.14244	5.47218	4.5951
TGME49_225510	X	2188673	2203113	8224	58.7601	61.1304	54.0063	54.5805	47.8515	51.2456	128.961	98.5517
TGME49_225500	X	2203198	2207509	2926	73.4786	71.169	54.2256	73.556	52.7105	54.5511	110.208	86.4213
TGME49_225490	X	2207265	2214583	5782	119.6	113.36	114.788	120.612	99.6399	134.493	201.033	164.437
TGME49_225480	X	2215466	2221776	5003	32.1969	29.5684	23.897	22.6077	30.1019	37.1656	35.0441	31.1114
TGME49_225470	X	2221843	2224818	2678	91.7283	69.4314	67.5919	70.1107	86.9688	90.6592	92.1812	87.3144
TGME49_225460	X	2224656	2226754	913	8.33143	3.48981	9.7906	10.9726	10.9841	6.74769	15.2157	9.3241
TGME49_225450	X	2226720	2234457	2208	25.331	22.3669	24.5433	31.0281	21.0649	19.6578	27.0107	24.2736
TGME49_225440	X	2235071	2244110	9040	4.94963	6.6463	4.44963	4.14675	4.41825	3.90306	6.62379	6.40797
TGME49_225435	X	2242445	2243676	354	27.1755	29.5732	47.3454	12.7804	23.4447	12.6567	24.5831	26.0399
TGME49_225430	X	2244442	2249228	2717	9.71637	7.03613	16.861	7.61218	7.50929	8.76057	17.866	13.2188
TGME49_225420	X	2249389	2251256	1322	68.0309	60.4255	70.9966	79.4457	75.5967	76.6797	58.8826	56.4687
TGME49_225413	X	2251587	2254869	1422	0.31466	0.320092	1.17864	0.909031	0.729555	0.787705	0.786035	0.991858
TGME49_225410	X	2259072	2262037	2100	41.7617	40.9654	55.3355	42.7803	42.2381	40.5375	45.7742	39.6741
TGME49_225400	X	2262442	2267262	3522	0.254087	0.387709	0.634499	0.367019	0.392742	0.795085	1.9495	1.2872
TGME49_225380	X	2268503	2277456	2839	17.8884	22.1252	31.0922	29.4817	23.2651	19.8259	21.8228	18.3994
TGME49_225370	X	2280392	2283345	2910	0.307524	0.156416	3.8397	2.9984	1.06951	0	0.823079	0.778952
TGME49_225360	X	2283583	2288097	3107	20.0177	27.8347	25.8929	27.7708	27.3798	23.7939	18.707	19.9414
TGME49_225350	X	2289934	2291911	1978	62.6607	65.5832	74.0006	77.7677	59.4414	66.2556	69.5461	66.3141
TGME49_225340	X	2293418	2307294	7478	41.4657	44.7684	36.6075	34.7447	35.9312	36.773	40.7201	37.7691
TGME49_225330	X	2307762	2312020	2462	86.6906	95.12	44.7032	70.6176	90.1744	77.7985	78.5416	81.9009
TGME49_225320	X	2313543	2316909	2733	84.6433	78.9429	36.3865	46.1151	75.9818	82.1747	57.4325	58.3713
TGME49_225315	X	2316053	2318592	1408	33.5267	37.8231	30.9494	36.0342	55.7519	58.0742	44.002	41.1421
TGME49_225310	X	2320018	2325906	3337	88.6983	81.4315	104.804	104.88	92.1777	85.343	94.792	94.0574
TGME49_225300	X	2325622	2331586	2874	106.257	100.568	65.7037	82.8704	115.931	126.179	126.509	122.338
TGME49_225290	X	2331444	2334816	3373	0.530622	0.674727	1.32505	2.10778	5.12613	3.81896	12.9238	15.2625
TGME49_225280	X	2336845	2345644	7644	1.52193	1.31002	2.99656	4.35447	2.08101	1.72179	4.12563	4.04612
TGME49_225270	X	2346436	2357631	10243	12.3187	15.6419	11.1266	13.8502	8.91278	8.74835	12.2217	9.55022
TGME49_225260	X	2360679	2374219	8364	36.4581	38.6384	43.417	51.3873	27.453	35.1208	43.2889	37.4901
TGME49_225250	X	2375498	2377451	1954	40.0733	38.4356	53.18	51.4345	52.0306	47.5792	46.9471	45.8093
TGME49_225240	X	2378769	2383446	1689	97.0926	93.1092	122.386	109.634	111.584	100.804	112.408	106.143
TGME49_225230	X	2387092	2389499	2235	110.41	130.238	98.9869	114.516	94.2272	104.118	227.371	180.619
TGME49_225220	X	2392747	2406860	3722	53.5566	65.2428	50.1337	48.2744	60.3911	75.3867	83.0992	78.035
TGME49_225210	X	2407197	2408244	826	45.5031	33.8898	13.5273	20.7355	35.167	43.0553	44.2689	40.9808
TGME49_225200	X	2407271	2433789	6856	82.0689	82.8881	57.7744	59.2964	57.4247	64.6975	69.2533	64.0233
TGME49_225190	X	2435381	2441538	3158	19.8362	18.9534	31.4897	28.6526	38.2711	43.8044	49.501	45.1723
TGME49_225170	X	2441781	2443740	1342	82.3543	68.3434	76.5994	80.429	110.932	109.132	154.68	128.033
TGME49_225160	X	2444433	2446914	2482	254.821	233.179	176.021	180.329	228.566	235.351	289.504	281.451
TGME49_225150	X	2447989	2453530	4158	296.845	263.82	222.772	235.57	261.852	308.517	323.483	284.425
TGME49_225140	X	2453779	2456055	1527	1.02558	0.596163	2.92692	7.19546	4.41603	7.33541	8.26098	7.45522
TGME49_225130	X	2459286	2468240	5108	14.8039	14.8367	13.3435	13.2858	11.7797	10.5258	16.8805	13.7468
TGME49_225125	X	2468448	2483938	9434	23.7857	29.7931	27.8923	30.1443	19.7024	17.4833	17.882	17.3638
TGME49_225120	X	2485900	2492123	1943	941.757	920.532	801.354	774.222	827.77	778.403	669.445	686.856
TGME49_225110	X	2492678	2501100	7982	39.9126	46.5606	51.6541	65.6686	63.2741	56.5531	56.5332	52.6252
TGME49_225108	X	2501867	2513520	5392	18.3808	17.6429	27.768	30.4461	18.8874	19.8908	23.1135	19.9359
TGME49_225105	X	2514573	2522622	4106	6.97433	8.48041	38.642	48.1671	17.7705	20.1872	32.7055	25.7504
TGME49_225102	X	2524154	2526802	859	5.20893	4.23908	11.7068	7.90032	7.85015	6.19389	6.50606	7.91647
TGME49_225098	X	2526812	2528190	279	14.4338	9.78862	44.0533	39.3816	26.0286	25.0922	24.3236	24.1931
TGME49_225090	X	2528418	2539669	9100	21.1185	25.1594	15.3482	17.0458	16.1884	14.1861	15.5993	14.9788
TGME49_225080	X	2539785	2542353	1791	1598.54	1761.85	2058.77	2099.91	2158.17	1959.42	1423.46	1795.03
TGME49_225070	X	2541834	2545559	2311	3.87232	2.16654	28.7678	35.5183	21.8469	18.9029	25.4268	24.979
TGME49_225060	X	2546940	2553096	2676	57.2685	60.3833	62.6318	58.5698	49.2998	44.3693	39.3227	39.7557
TGME49_225050	X	2553785	2557736	3332	150.067	182.027	184.102	173.607	121.946	118.332	83.385	103.496
TGME49_225032	X	2560023	2562588	201	0	0	0	0	0	0	1.98604	0.501216
TGME49_225028	X	2562967	2575395	3489	0.128245	0	0	0.555736	0.0991141	0.160521	0.183064	0.577498
TGME49_225024	X	2574500	2574571	72	0	0	0	0	0	0	0	1.39923
TGME49_225020	X	2578510	2585102	5065	57.9958	71.668	43.2381	46.895	53.2198	57.7197	60.5923	59.0743
TGME49_225010	X	2583910	2594093	6273	44.5806	48.18	38.1179	39.5644	27.1498	30.6679	44.8894	36.5044
TGME49_225005	X	2594192	2596141	429	77.182	52.5197	74.2297	58.7565	55.6196	43.0814	49.3176	45.2059
TGME49_225000	X	2597363	2604888	4785	70.4133	97.4551	60.5962	61.9307	45.7465	43.6576	59.7831	57.2043
TGME49_224990	X	2607448	2611517	2770	55.729	49.1321	51.4305	59.7322	65.6663	66.0141	84.9115	79.85
TGME49_224980	X	2611947	2621767	4520	38.3102	45.4164	40.0467	43.9699	40.3571	31.2245	54.8273	48.6337
TGME49_224970	X	2621848	2629625	7024	56.0901	65.677	46.9275	48.0784	36.9244	42.2595	51.536	49.5117
TGME49_224960	X	2630758	2636021	5264	45.0507	37.9597	37.7828	35.8522	40.5984	47.2921	63.7314	58.152
TGME49_224950	X	2638610	2648095	6272	52.2568	53.558	28.1476	32.4603	42.0683	43.576	69.6807	57.0221
TGME49_224940	X	2649922	2656440	3727	7.32339	9.03747	7.34508	7.6303	9.37127	7.51353	14.4168	13.8939
TGME49_224935	X	2657901	2667290	8062	9.60163	7.84777	8.1771	9.29959	9.60819	12.0529	12.1115	9.9095
TGME49_224932	X	2666957	2670322	1465	1.2217	0.310697	3.05079	6.17645	4.36687	3.05834	6.59419	3.74783
TGME49_224928	X	2671448	2677818	5421	5.77777	6.63318	7.93545	8.22656	5.35841	4.18416	6.15617	5.06417
TGME49_224920	X	2679352	2691240	7458	17.3387	16.7836	14.083	14.7325	9.43579	14.0428	15.9827	12.1304
TGME49_224910	X	2691379	2695679	1812	80.501	80.6346	78.9299	74.3697	57.7303	51.7714	47.9825	48.0649
TGME49_224905	X	2697252	2698032	450	0.994327	2.02298	4.96601	4.30881	6.91618	3.11143	4.79032	3.35815
TGME49_224900	X	2700433	2704750	2457	184.661	205.633	235.112	239.641	213.017	223.157	191.652	191.71
TGME49_224890	X	2704826	2713082	7046	32.4504	32.3968	27.5929	25.1337	26.797	31.1188	53.7433	42.8228
TGME49_224880	X	2714526	2722322	6027	37.5657	34.8156	14.8313	16.7291	21.9466	26.623	24.7981	22.2484
TGME49_224870	X	2727979	2764454	26327	5.72757	6.39698	5.98422	6.70208	4.03249	4.32909	5.55872	5.52952
TGME49_224860	X	2764676	2769172	2499	33.0348	23.223	45.8298	32.8463	22.7633	26.4453	37.9545	32.8155
TGME49_224850	X	2771799	2780641	7557	246.726	247.612	216.758	233.486	190.019	205.584	200.701	185.425
TGME49_224845	X	2780781	2784309	2763	19.9999	17.9564	20.2199	24.7955	29.099	31.7224	36.8998	34.1467
TGME49_224840	X	2782563	2800010	9238	19.9554	18.871	16.389	20.989	24.9306	24.4624	34.3623	32.5473
TGME49_224830	X	2801481	2808155	4330	13.0721	17.7653	13.6766	17.9119	16.0126	18.4961	28.0265	24.7324
TGME49_224820	X	2807579	2810357	2779	36.9518	36.6888	61.1146	48.4915	41.5618	62.0719	55.7923	48.6684
TGME49_224810	X	2810147	2821093	7454	1.62075	3.20586	5.39639	4.3354	7.51557	7.32569	9.25418	8.23769
TGME49_224800	X	2822981	2825834	2450	44.836	39.572	33.7486	38.6474	32.8166	41.8329	32.8479	30.8196
TGME49_224790	X	2827512	2829791	2280	0	0	0	0	0	0	0.070034	0.265117
TGME49_224780	X	2829525	2831099	1356	0	0	0	0	0	0	0.235512	0
TGME49_224770	X	2833529	2834981	1453	0.307947	0	0	0	0	0.38545	0.549475	0.693355
TGME49_224760	X	2836195	2837821	1627	1.65008	3.35713	2.74702	5.16421	12.7526	8.94992	12.3659	13.0652
TGME49_224750	X	2838589	2840684	2096	2.56172	0	7.99632	13.5678	9.07419	6.01208	18.3979	13.8428
TGME49_224740	X	2841830	2848397	2237	63.8067	86.4763	70.9271	61.974	48.7719	46.0665	54.8557	58.7488
TGME49_224730	X	2848576	2854440	3116	29.4373	32.0635	33.1691	46.7733	27.0788	43.1367	38.5614	36.0171
TGME49_224720	X	2854589	2860220	3530	39.421	32.8161	28.4877	33.2315	23.0703	28.9548	29.0405	27.6976
TGME49_224710	X	2860627	2865023	3214	8.84035	8.35565	39.1108	38.7109	40.6708	41.0372	62.9717	56.9861
TGME49_224700	X	2864418	2876328	9584	38.1665	42.8622	24.1331	23.1648	26.3939	31.176	50.4907	39.9604
TGME49_224680	X	2876726	2881932	3922	1.14086	1.74084	2.56404	4.03745	6.87738	8.49655	7.24696	6.49881
TGME49_224675	X	2881957	2884390	1137	2.75473	0.400326	0	0.568444	0.912425	2.95545	1.26394	1.94932
TGME49_224670	X	2886495	2900264	10772	10.0314	10.9863	8.50565	9.90002	9.82339	7.79881	8.04909	8.70712
TGME49_224660	X	2900567	2907004	6438	30.2329	32.3809	28.2896	40.4578	28.4414	26.2718	33.632	34.5204
TGME49_224650	X	2906343	2912098	4519	26.0408	23.9723	30.1653	34.3255	31.6424	29.1245	42.49	37.364
TGME49_224630	X	2914720	2922825	7639	4.56877	5.18391	3.21793	4.56884	5.81705	5.42536	15.5204	11.177
TGME49_224620	X	2922886	2931658	4734	39.792	31.3447	24.1928	26.4863	37.4371	43.359	74.1721	67.4077
TGME49_224610	X	2934463	2942377	5682	21.1833	24.593	32.2502	23.4323	21.6967	21.3891	22.3554	23.9007
TGME49_224600	X	2942898	2952649	4053	24.7294	25.8301	28.9469	33.5679	20.8185	20.6585	26.5538	23.5518
TGME49_224590	X	2952843	2961715	3745	21.5659	24.5513	26.2555	24.9382	19.4373	15.2539	28.8656	23.4174
TGME49_224580	X	2962379	2968586	2921	66.5579	68.0185	95.6309	81.4263	62.5676	70.3668	67.5663	66.7031
TGME49_224575	X	2970206	2971541	432	6.73242	0	10.3459	2.24417	5.20314	3.24108	7.20766	5.71352
TGME49_224570	X	2971808	2975988	2859	53.2899	53.6525	59.2091	62.9592	39.1288	49.1692	42.7817	40.8757
TGME49_224560	X	2975738	2976678	318	41.5084	60.8326	45.6779	64.0224	55.4599	50.1939	46.447	52.9067
TGME49_224540	X	2977228	2998628	14397	13.5505	20.2498	9.85648	10.6396	16.5494	15.7744	14.8841	13.04
TGME49_224530	X	3001176	3006103	3190	131.078	120.142	97.024	99.2782	115.721	133.782	117.355	108.466
TGME49_224520	X	3006523	3010154	2188	245.605	208.239	219.589	216.967	258.804	285.532	276.699	236.045
TGME49_224510	X	3010491	3023998	7373	14.5346	17.224	12.9572	13.2806	8.46582	8.81144	10.3304	9.38032
TGME49_224500	X	3027196	3027267	72	0	0	0	0	0	0	4.43548	0
TGME49_224490	X	3028526	3035208	3001	16.7737	18.9591	18.9887	12.1683	15.4986	9.70444	12.158	11.6825
TGME49_224480	X	3036304	3048706	8437	33.6235	36.0651	46.0873	47.9934	34.6342	34.9497	65.7673	52.9753
TGME49_224470	X	3048995	3052665	3230	103.689	86.2429	63.1321	61.4305	66.0035	75.3391	126.012	105.267
TGME49_224460	X	3052825	3061801	3903	541.912	588.818	457.333	466.153	391.261	400.062	440.085	436.805
TGME49_224350	X	3062275	3073346	6148	115.719	142.333	131.581	124.786	114.238	108.951	104.097	107.717
TGME49_224340	X	3074413	3076887	1883	64.1586	73.7265	72.3935	79.975	102.751	98.0027	59.826	72.9501
TGME49_224330	X	3080295	3085201	3684	76.2749	82.5337	77.3411	76.9305	62.1405	58.3774	73.9657	66.3016
TGME49_224320	X	3086687	3096116	8843	2.27696	4.37516	2.14802	4.38531	3.65635	3.54668	5.98587	4.45449
TGME49_224310	X	3097711	3107450	2937	54.7692	50.1354	49.0767	54.4653	46.4493	56.063	66.1381	54.214
TGME49_224290	X	3107538	3118002	4329	107.546	111.821	107.115	113.618	80.6408	83.7047	87.7691	82.3363
TGME49_224280	X	3118874	3136288	9687	13.2567	13.9084	13.4954	12.9104	8.56758	9.22156	11.5798	9.22477
TGME49_224275	X	3137024	3138781	1202	2.23351	0.378678	3.25352	1.07541	0	1.39782	3.98529	3.01731
TGME49_224270	X	3139007	3152942	12875	15.6737	23.5451	13.9723	13.4033	12.1402	11.0489	21.1022	18.2005
TGME49_224260	X	3156522	3178407	16974	24.5946	32.3264	20.9989	23.3413	15.2695	14.9468	19.2189	17.4941
TGME49_224250	X	3179886	3181274	1389	15.9457	17.6956	9.65315	5.81643	5.47718	7.66098	16.8414	16.138
TGME49_224240	X	3185912	3194937	5785	34.8057	38.3571	33.2212	33.964	31.2334	36.7886	44.1218	38.2603
TGME49_224235	X	3196619	3200728	2633	49.0271	43.5636	42.8608	49.5848	51.6152	57.3246	42.2997	45.4938
TGME49_224230	X	3203999	3213156	8300	6.9543	8.55502	4.5771	5.91812	8.66606	7.08507	12.2932	10.5114
TGME49_224220	X	3216152	3223591	4723	37.3267	46.741	36.6694	40.5747	31.1177	32.7284	33.6056	33.1371
TGME49_224210	X	3225502	3238160	4071	52.3176	62.2771	44.4635	51.5184	43.4066	30.6099	40.2626	42.8368
TGME49_224205	X	3239333	3248136	3659	98.9299	103.81	95.4284	99.8009	69.7478	75.3071	100.786	87.2118
TGME49_224200	X	3249554	3257366	3627	17.2712	20.9577	13.8629	18.6216	14.3014	19.6105	16.7514	17.3185
TGME49_224190	X	3258449	3272399	6370	30.3449	28.3321	27.276	26.8878	24.0221	25.9807	25.0546	23.6362
TGME49_224180	X	3273536	3281941	4800	0.466091	0.853445	1.86225	1.6158	2.73765	3.38368	2.59476	3.77792
TGME49_224170	X	3283805	3286136	1881	0.237877	0.967934	5.34618	3.95146	4.04455	4.76392	15.6197	15.4518
TGME49_224160	X	3286875	3299729	7137	8.43234	9.43888	7.98444	7.15418	6.92878	6.43474	6.09669	5.79454
TGME49_224150	X	3302123	3306608	4486	11.8694	14.7124	14.4464	11.9582	10.2139	12.6718	15.626	13.6654
TGME49_224140	X	3306520	3312549	4214	0.318543	2.48432	8.48487	9.50924	13.0478	13.224	20.5565	17.6315
TGME49_224130	X	3313346	3314993	1269	1872.82	1716.66	1554.96	1404.44	1566.22	1338.14	1111.14	1257.04
TGME49_224110	X	3318155	3325154	1927	132.121	126.725	147.279	134.664	128.31	114.802	100.803	106.861
TGME49_224100	X	3325561	3326588	1028	12.1873	13.2832	19.0211	10.0595	8.74614	12.2581	27.1824	20.8741
TGME49_224090	X	3326427	3333930	5413	39.3056	38.4284	34.1625	32.2385	30.3134	35.1265	44.9858	39.4379
TGME49_224080	X	3337301	3343381	6081	0.147162	0.149703	1.6537	0.850283	0.540238	1.33545	2.6521	1.97148
TGME49_224070	X	3346633	3356119	5229	17.6275	20.1079	20.5136	22.0632	18.0543	19.4398	18.7038	18.7463
TGME49_224060	X	3356371	3361940	5570	99.0489	114.406	90.0702	95.2657	87.1041	98.2364	111.287	102.291
TGME49_224050	X	3363973	3369458	4322	52.7474	59.2396	57.91	60.415	51.8473	50.6022	59.7405	53.3442
TGME49_224030	X	3372162	3384263	6723	21.0313	20.6496	18.448	18.7465	20.9862	19.535	32.4556	30.4122
TGME49_224040	X	3372209	3373645	1437	3.73651	4.11776	16.3287	16.8664	17.5672	14.8102	24.4461	21.523
TGME49_224020	X	3386255	3388080	1475	68.7097	70.9758	132.567	118.091	111.479	96.8236	99.5413	102.998
TGME49_224010	X	3389954	3394146	4193	0	0.108555	0.799441	0.924858	1.07215	1.53605	3.38929	2.01825
TGME49_224000	X	3394982	3400364	4401	83.4197	92.6165	56.6166	57.348	113.109	115.995	94.152	97.8602
TGME49_223985	X	3402178	3417730	13991	17.8614	24.0094	11.3404	10.9021	11.1224	13.2299	19.6301	15.143
TGME49_223970	X	3416843	3423168	6326	13.439	11.1526	15.5433	17.7774	11.9442	13.8111	12.7974	13.027
TGME49_223960	X	3424020	3429742	2739	73.5127	82.0936	81.1804	94.8599	75.7522	81.5857	65.1185	68.6342
TGME49_223950	X	3431663	3437896	4441	33.7525	36.4875	35.9787	47.4444	34.1838	36.8874	45.5014	39.5628
TGME49_223940	X	3439187	3443009	3823	743.443	866.289	717.525	734.318	805.682	740.103	680.143	714.184
TGME49_223930	X	3444403	3451101	3841	129.947	119.036	130.906	140.925	122.577	125.178	189.193	164.992
TGME49_223920	X	3452983	3464875	7094	247.029	223.575	188.063	210.141	203.712	234.476	219.596	211.962
TGME49_223915	X	3465496	3466567	824	0	0.552392	4.06803	0.78437	5.24589	2.03905	8.23579	6.90784
TGME49_223910	X	3467025	3476099	3610	66.4353	61.4039	58.4985	61.7675	57.8583	68.7274	73.0491	59.7769
TGME49_223900	X	3478896	3484968	2991	0	0.60872	3.73571	2.16089	3.06384	2.62147	3.87048	5.0187
TGME49_223880	X	3488611	3509734	11855	17.4752	24.4575	16.871	17.7459	13.3744	14.8813	23.7731	19.9832
TGME49_223870	X	3515239	3524757	5170	6.88047	7.48346	6.91591	11.9388	12.7086	11.1037	16.7708	14.8096
TGME49_223855	X	3526135	3533267	1698	69.1725	88.7288	49.682	58.9987	52.2379	52.2787	93.8034	97.5109
TGME49_223845	X	3534834	3536442	312	23.6631	29.1776	10.7438	33.1447	23.2756	28.7209	48.1079	43.9143
TGME49_223840	X	3540454	3545201	4304	88.8864	94.0164	78.1419	86.1211	52.8676	77.2943	89.0024	83.7743
TGME49_223830	X	3548619	3553710	2386	0.468825	0.190767	0.468295	1.89616	1.95659	4.34245	3.34613	2.74451
TGME49_223810	X	3555769	3565377	8140	29.7382	30.9225	25.2571	26.9565	29.2706	36.2593	46.9518	39.0973
TGME49_223800	X	3565547	3572508	3772	43.2975	49.4751	39.1014	39.8382	51.1563	36.674	39.9405	40.9708
TGME49_223790	X	3574095	3582259	4336	74.0929	66.449	50.5076	55.0029	63.922	62.322	80.4832	77.905
TGME49_223780	X	3582871	3599186	7997	18.8558	20.4334	16.2077	15.76	14.4429	13.6916	13.5178	12.7175
TGME49_223770	X	3600232	3601253	524	0.853906	0	0	1.23344	0.659941	0	3.04728	1.34582
TGME49_223760	X	3602058	3610110	6086	30.9155	28.2705	29.4668	30.3195	23.1827	28.0673	34.2784	32.2793
TGME49_223750	X	3612863	3620762	5205	33.6552	34.8046	21.8962	25.828	41.5237	37.4448	62.6132	52.0078
TGME49_223725	X	3620860	3635966	13860	2.45353	3.53036	1.77357	2.40155	2.86927	3.17205	4.64862	4.60473
TGME49_223710	X	3637899	3647194	3739	45.5345	51.3117	51.9977	61.4515	39.9082	37.4471	31.6664	30.7299
TGME49_223700	X	3646966	3653661	5269	1.06151	0.388739	4.45329	4.04794	3.74096	4.78319	4.65183	4.09173
TGME49_223690	X	3654351	3655785	1129	127.814	147.961	174.184	168.021	152.842	171.143	188.035	191.45
TGME49_223685	X	3655909	3657340	858	94.1308	83.8193	121.763	123.163	108.015	78.3298	76.1166	81.6641
TGME49_223680	X	3655939	3661812	3642	164.26	157.16	227.95	210.915	171.575	156.546	152.158	151.324
TGME49_223672	X	3661975	3664863	2098	89.6813	82.4427	65.7736	76.7083	62.5522	81.2859	86.6886	81.1286
TGME49_223668	X	3665374	3667616	1038	76.0832	73.2307	97.9567	105.23	120.267	112.497	73.7624	94.7755
TGME49_223660	X	3669257	3679000	3435	35.2356	39.3554	43.5881	38.196	27.5842	23.1523	37.4208	34.4027
TGME49_223650	X	3680383	3682605	2223	3.72369	6.96168	9.55002	9.44914	6.45572	4.28295	10.5949	9.17713
TGME49_223640	X	3683118	3688152	5035	10.2642	10.4866	8.32189	9.3707	6.73074	8.45371	12.6537	11.1249
TGME49_223630	X	3689208	3692153	2747	38.7668	33.968	25.6255	27.1751	29.835	24.8734	28.8896	29.5779
TGME49_223620	X	3692036	3694363	2328	60.832	49.7599	55.6756	55.8035	52.213	47.8744	52.437	47.2781
TGME49_223610	X	3696440	3701806	4533	50.835	70.3391	26.1282	27.7321	37.8002	41.9457	49.1573	45.7495
TGME49_223600	X	3705763	3718657	3474	22.089	22.2082	23.8008	29.9533	23.4421	23.2955	30.8875	27.3901
TGME49_223590	X	3721846	3723787	1718	266.827	270.638	319.011	319.963	348.828	342.946	257.687	283.762
TGME49_223580	X	3723672	3729111	2799	22.78	29.434	27.5446	23.553	27.4275	25.8119	27.6683	27.3907
TGME49_223570	X	3729115	3737748	5424	44.588	55.4278	39.1403	49.0937	56.4235	48.1687	55.7576	55.0064
TGME49_223560	X	3737711	3741190	3480	17.2293	15.3032	12.8431	17.3652	25.4885	23.1748	24.7087	27.6324
TGME49_223550	X	3742143	3744627	2485	27.0089	19.5989	26.079	26.5291	29.6408	35.6093	71.903	61.1156
TGME49_223540	X	3744771	3758629	5903	52.7568	52.7036	45.6178	49.4896	35.0906	37.2392	41.9008	41.8133
TGME49_223530	X	3759464	3761528	2065	83.639	86.1849	87.6567	98.5914	84.0659	85.4326	111.542	113.746
TGME49_223520	X	3761648	3765541	3160	19.7528	17.8611	21.2155	21.6804	22.3244	19.6729	24.9117	22.0458
TGME49_223510	X	3764640	3770662	3780	41.1343	32.5122	33.1067	34.6244	36.0446	35.7815	45.0307	41.5371
TGME49_223500	X	3773223	3780873	4205	17.717	21.7573	24.7119	21.0573	19.038	16.3822	16.7842	14.902
TGME49_223490	X	3781999	3784115	2117	51.8886	49.8817	73.892	74.646	65.5028	57.9371	45.0295	54.1793
TGME49_223485	X	3784431	3788333	2396	85.5304	91.1861	119.85	96.031	76.4215	79.0065	78.2059	73.456
TGME49_223480	X	3790471	3822392	14259	0.753119	0.798041	2.03739	2.26636	2.20693	1.66929	3.02916	2.4446
TGME49_223470	X	3823132	3826914	3318	23.7344	27.0935	29.2977	32.5303	25.1175	30.2985	37.0319	31.9419
TGME49_223450	X	3824770	3839374	11452	20.0632	27.7029	18.4892	20.7972	19.9749	21.2247	30.7726	27.6273
TGME49_223440	X	3841050	3849999	7091	15.996	18.1657	13.3937	11.7124	9.26579	12.5976	15.1323	13.3762
TGME49_223430	X	3850737	3854318	3471	2.19147	1.04908	4.82866	4.65515	9.41485	7.26091	7.93557	9.36044
TGME49_223420	X	3855365	3857998	2213	43.2687	40.519	39.8874	43.9545	41.9565	39.4799	39.0355	34.7803
TGME49_223410	X	3858163	3862224	1997	309.65	298.357	375.435	347.11	309.531	309.056	287.931	305.26
TGME49_223400	X	3863011	3863906	716	1.24985	0	3.12109	8.12415	7.72758	2.34661	9.36655	6.191
TGME49_223390	X	3866149	3884229	7809	62.6563	66.2151	63.2436	70.3099	50.7045	47.837	63.1737	62.0348
TGME49_223270	X	3885062	3900527	6348	13.0752	12.8348	11.7931	14.5595	12.2025	9.39606	15.6835	13.3628
TGME49_223262	X	3901302	3908089	2170	14.9493	12.4805	20.5963	21.2958	23.1867	17.9373	30.9053	28.9698
TGME49_223258	X	3908135	3911284	1404	4.14303	2.43147	0	3.68274	4.06399	1.39616	5.2316	5.09463
TGME49_212310	X	3924779	3928960	2183	581.189	451.001	627.519	591.844	599.819	608.034	552.58	524.49
TGME49_212300	X	3931247	3940138	5790	254.442	242.994	194.909	205.282	178.907	185.912	356.834	297.17
TGME49_212290	X	3940320	3943436	2358	1589.21	1521.1	1728.86	1826.45	2026.75	1798.1	1201.64	1411.81
TGME49_212280	X	3942554	3944844	2291	38.2801	44.8018	72.1816	42.0349	56.0751	40.8248	37.6368	47.2061
TGME49_212275	X	3947453	3948702	732	7.64083	4.35273	78.6115	87.8538	79.8384	96.0209	96.9626	85.6741
TGME49_212270	X	3949290	3952867	2751	735.579	621.206	606.603	584.649	884.824	951.549	1299.88	1137.58
TGME49_212260	X	3952667	3957556	2109	171.214	166.076	206.358	180.351	213.159	196.379	210.556	219.546
TGME49_212250	X	3957369	3963234	4076	123.772	112.788	124.455	125.982	97.0573	108.068	141.128	120.703
TGME49_212240	X	3964956	3969809	3729	0.359973	0.244125	2.39711	2.16654	2.55021	2.02756	2.46218	1.48591
TGME49_212230	X	3969600	3969672	73	6.12941	0	0	0	0	0	0	1.38006
TGME49_212220	X	3970053	3976389	6337	77.5989	88.7788	83.2239	89.9567	54.2697	53.8229	90.1571	74.4415
TGME49_212210	X	3977984	3980223	1363	209.772	149.442	113.129	112.857	177.852	218.805	172.154	177.837
TGME49_212200	X	3980604	3986881	4173	45.7312	34.0315	15.3961	17.2693	46.862	45.2959	39.7759	36.901
TGME49_212190	X	3985743	3993493	7031	54.5388	50.7544	52.284	47.3871	51.9132	53.2099	57.7868	52.4642
TGME49_212180	X	3993187	3994620	1434	5.30446	5.71344	14.0253	11.4932	11.4546	16.5987	16.3129	12.4701
TGME49_212170	X	3996054	4002782	5768	15.7475	18.4657	24.2145	30.3663	33.4538	33.0131	31.6005	30.5133
TGME49_212160	X	4004530	4006868	2339	24.1036	26.8549	15.7643	16.5794	42.7271	34.7193	41.609	41.2841
TGME49_212150	X	4007945	4020028	3873	18.0804	14.573	21.4931	21.1936	17.9467	20.1002	21.0471	17.6231
TGME49_212145	X	4020052	4021673	417	6.43809	6.54922	2.6795	22.474	7.04886	6.71533	9.95591	6.88541
TGME49_212140	X	4023906	4035946	7028	23.8749	32.2531	31.2407	28.0949	25.1435	25.66	26.2077	24.6342
TGME49_212130	X	4041105	4055668	5303	42.2303	42.4443	30.9732	39.1839	32.279	39.7628	56.8943	45.7938
TGME49_212110	X	4055761	4062337	4582	5.85919	5.56298	4.87714	6.4886	4.15092	4.09471	5.47127	4.95807
TGME49_212100	X	4061699	4070078	5520	12.7263	9.56518	12.55	9.83532	7.42362	7.40657	10.1679	9.29879
TGME49_212090	X	4071176	4075785	4610	32.4181	40.8765	38.7801	39.957	46.5079	48.2306	52.7871	50.1646
TGME49_212075	X	4080665	4085207	2901	0	0.156901	0.385161	0.222793	1.19203	0.193057	0.660506	0.520912
TGME49_212060	X	4087180	4088687	492	0	0	0	0	0.702864	0	0.162274	0.307148
TGME49_212045	X	4089727	4092301	1854	0	0	0	0	0.746082	0	1.11964	0.624898
TGME49_212030	X	4107568	4109705	2138	0	0	0	0	0	0.261954	0.0746854	0.0471209
TGME49_211920	X	4116235	4117819	1514	0	0	0	0	0.228408	0	0.210935	0
TGME49_211910	X	4120525	4126697	2444	0	0	0	0	0.353733	0	0.261338	0.309159
TGME49_211890	X	4133941	4153882	16157	6.67418	6.62036	4.42598	5.08032	3.95956	4.81823	7.01683	5.22834
TGME49_211880	X	4155259	4155831	573	27.331	34.1577	30.2251	46.8104	29.8736	28.345	49.3244	42.6362
TGME49_211870	X	4155866	4158275	1551	38.5133	39.9118	33.1387	45.4217	50.3887	51.8171	53.0199	49.5928
TGME49_211860	X	4159491	4163471	3981	29.7286	29.7273	43.2234	55.8489	66.2345	75.2653	67.0236	65.0879
TGME49_211850	X	4162652	4165554	2418	151.925	135.723	90.109	99.7013	176.265	207.184	156.739	143.096
TGME49_234165	X	4167968	4171747	3706	0.482943	0	0.602996	0	0.0933106	0.151122	1.2495	1.01941
TGME49_234180	X	4173230	4176974	2420	144.866	138.902	86.3408	90.4049	125.034	131.915	196.397	180.736
TGME49_234190	X	4177284	4182279	2461	310.086	276.228	344.604	391.969	282.366	306.769	262.485	264.408
TGME49_234200	X	4188826	4194038	4806	7.54124	7.67142	8.36968	6.99307	7.98685	6.64239	6.03026	6.70791
TGME49_234220	X	4197852	4207749	5471	30.4241	36.8979	31.5538	29.1796	28.0326	28.612	28.4711	26.8848
TGME49_234230	X	4207705	4228970	18706	13.6105	21.0236	12.484	13.6133	14.9556	10.8084	14.6651	13.6042
TGME49_234250	X	4233232	4253231	11084	40.2678	47.0817	31.2504	36.4445	35.7852	34.0057	38.702	38.4018
TGME49_234260	X	4252376	4253580	1205	12.9964	16.2426	5.56358	12.0682	9.3268	12.0842	16.6966	16.303
TGME49_234270	X	4254282	4268066	7039	34.93	37.5699	22.0645	26.3064	29.2555	35.7645	41.2181	37.3194
TGME49_234280	X	4269781	4284098	6129	25.5882	26.6983	25.3405	26.1523	22.3148	16.4938	24.8153	23.1109
TGME49_234300	X	4285786	4297018	11233	13.7425	15.6005	8.05711	10.4719	10.6363	8.22662	12.2107	12.444
TGME49_234310	X	4299033	4304855	2800	105.31	140.534	112.932	107.682	125.479	87.2091	107.754	104.666
TGME49_234340	X	4303951	4305441	1491	37.0622	50.0657	69.694	40.3138	45.1106	41.3188	50.0665	49.6628
TGME49_234350	X	4305900	4308401	2502	54.0084	53.9401	28.8046	43.9147	43.5371	47.0073	89.4436	72.3572
TGME49_234360	X	4312377	4326250	5232	48.2767	50.6325	49.653	54.5395	38.8308	44.0489	55.4232	47.8016
TGME49_234370	X	4326607	4329557	2951	24.2601	19.2804	20.0677	25.187	64.2167	53.5196	60.9815	61.86
TGME49_234375	X	4327971	4329741	955	17.8042	11.6772	18.72	16.2426	42.004	44.5701	49.7424	46.2053
TGME49_234380	X	4329852	4332864	2585	542.216	466.616	335.206	338.787	513.964	471.987	514.828	518.571
TGME49_234390	X	4333080	4336984	3011	36.6309	37.49	69.3938	65.2546	43.5276	45.664	54.3837	51.5935
TGME49_234400	X	4337306	4339180	1225	1.09579	0	0.912124	0.527609	16.7964	13.9443	7.75576	4.35874
TGME49_234410	X	4341840	4364457	11716	27.6313	28.0694	20.1707	23.5282	21.3991	22.3956	29.6635	28.1097
TGME49_234420	X	4365057	4374462	3707	45.0827	50.711	48.2267	51.4337	40.0661	41.3207	34.5458	35.0445
TGME49_234430	X	4376522	4387107	10586	7.94635	10.3194	8.18012	8.12023	7.59499	6.56029	11.6145	9.10279
TGME49_234440	X	4389698	4396077	2757	42.6836	39.0453	56.131	64.1164	51.9905	64.0908	65.3594	64.2031
TGME49_234450	X	4396848	4399370	1336	2408.71	2151.33	3335.33	3027.7	2965.26	3067.95	1903.04	2108.7
TGME49_234460	X	4401664	4407702	5383	24.4795	19.7864	22.6252	22.0923	16.8954	21.1726	53.8537	40.0695
TGME49_234470	X	4407804	4413808	5034	23.8656	22.8309	28.633	32.9323	29.1952	24.5874	33.5278	30.3995
TGME49_234490	X	4414246	4421960	4813	42.904	42.7934	48.1717	46.866	45.9474	41.8327	53.2313	49.514
TGME49_234505	X	4423223	4428801	2379	113.131	95.8556	143.485	149.151	109.31	112.647	92.7928	101.126
TGME49_234507	X	4429903	4431663	1176	19.9753	24.7712	31.8293	28.8536	46.7548	39.0517	48.6093	50.2437
TGME49_234510	X	4431469	4433907	1542	127.096	112.464	109.779	111.073	122.895	107.145	124.832	128.315
TGME49_234520	X	4434055	4439930	2382	57.7624	62.7723	73.1767	72.1753	68.8134	80.7641	77.9282	73.8877
TGME49_234530	X	4440705	4442926	1230	182.98	196.316	149.889	159.478	237.849	224.251	305.075	307.475
TGME49_234540	X	4443067	4447586	2920	72.5569	66.1712	52.4237	49.0275	70.4053	62.6229	76.2296	74.3853
TGME49_234550	X	4449177	4451220	838	2642.77	2474.38	3194.72	3235.85	3277.35	2955.68	2073.81	2522.58
TGME49_234560	X	4454415	4464921	5630	27.8164	34.158	32.7465	31.3403	21.8664	22.3327	24.0367	22.5378
TGME49_234570	X	4467642	4474276	2340	0.764867	0.389035	2.3875	1.79534	1.92116	2.39341	5.3567	2.43251
TGME49_234580	X	4476065	4483960	4109	7.35037	8.58499	7.07013	7.8647	7.9951	8.10987	9.40422	7.42895
TGME49_234590	X	4485140	4486246	1107	5.65877	3.70058	6.56078	5.25464	6.24768	5.56517	5.55337	4.73235
TGME49_234600	X	4485703	4489019	3317	6.00283	6.79257	9.09512	7.20949	5.47331	8.2734	5.82483	4.75324
TGME49_234610	X	4489831	4500146	4811	46.3165	61.8752	44.1274	50.9829	44.2774	42.5486	38.5503	46.069
TGME49_234617	X	4501440	4501511	72	0	0	15.5188	17.9534	4.8029	0	0	4.19769
TGME49_234622	X	4502574	4502646	73	0	0	0	0	0	0	0	2.76012
TGME49_234625	X	4503778	4504869	1092	19.668	23.7589	19.4411	20.1236	11.717	12.5654	40.6505	30.6293
TGME49_234640	X	4505614	4514645	5282	37.019	52.006	24.9617	34.2616	26.9406	27.1971	45.8445	42.2375
TGME49_234670	X	4516851	4526263	2900	21.6009	26.5255	22.925	26.2986	19.9138	15.9327	13.7102	14.2432
TGME49_234690	X	4528145	4528228	84	0	0	0	0	0	0	1.90092	2.99835
TGME49_234900	X	4530476	4550003	16704	27.8047	36.4731	19.6326	20.7973	18.0937	17.6359	27.3633	22.644
TGME49_234930	X	4550079	4552452	2374	32.0413	31.7316	23.0624	31.8532	25.4914	17.9294	33.5968	30.4483
TGME49_234940	X	4553664	4555458	1795	26.1738	28.4006	52.9108	39.2474	48.5481	45.5535	95.2282	78.8276
TGME49_234950	X	4555624	4558682	2256	77.0537	66.4799	46.0611	56.2953	80.7807	69.3866	157.554	135.599
TGME49_234970	X	4560506	4577691	7075	19.9849	26.6347	21.7943	24.848	18.2313	15.4362	20.5493	21.5372
TGME49_234980	X	4577169	4584435	6897	19.8195	24.8143	19.4407	18.4141	18.8021	17.5805	22.515	22.7212
TGME49_234990	X	4584691	4592402	6738	23.6407	25.9403	27.1129	28.1051	19.1688	18.4525	31.8739	30.1277
TGME49_235000	X	4593128	4601971	6205	0.721107	0.440133	5.76233	2.18739	4.29126	5.59607	5.36547	5.20364
TGME49_235010	X	4602023	4604624	2602	2.06355	0.699724	3.43536	7.07923	6.11346	5.38104	9.9108	8.44054
TGME49_235020	X	4605533	4624538	5603	78.98	88.5483	79.3693	78.7859	52.8619	59.0245	59.904	55.0292
TGME49_235130	X	4624704	4633012	5982	64.6636	58.9698	51.3661	49.8084	57.7505	67.9241	82.4413	65.9925
TGME49_235140	X	4633595	4638848	2831	184.526	183.933	204.841	180.586	109.447	116.127	165.797	150.174
TGME49_235150	X	4639220	4643938	4719	84.1985	74.7526	114.127	103.954	77.164	90.554	86.2847	85.1599
TGME49_235160	X	4656764	4671681	6523	73.2941	70.0236	70.3163	75.5511	53.1463	62.4195	62.8991	53.0982
TGME49_235170	X	4671803	4685577	5785	82.6056	86.5887	87.3022	93.0658	61.4805	72.7059	77.9756	76.1374
TGME49_235180	X	4690624	4697445	2877	0.777628	0.791051	1.16512	1.79721	2.10346	1.84934	3.44108	2.6438
TGME49_235183	X	4698199	4717072	5586	0.560711	0.570389	1.00014	2.08267	2.94055	4.1107	3.20155	3.95872
TGME49_235187	X	4722738	4744111	6252	0	0.072804	0.357438	0.723648	2.98683	2.59784	2.74557	3.13417
TGME49_235190	X	4745538	4757945	2937	0.152348	0	2.66308	1.76049	9.12502	5.0533	8.6988	9.24434
TGME49_235200	X	4760256	4768580	5796	0	0.0785319	0	0.111512	0.417644	0	0.220397	0.312871
TGME49_235315	X	4771125	4782510	7595	0.117827	0.179791	0.882701	0.765884	1.09275	0.589923	1.72397	1.0479
TGME49_235340	X	4784548	4793691	3916	215.497	205.908	149.37	156.629	185.886	187.21	190.565	171.916
TGME49_235350	X	4793864	4800733	3597	34.3329	36.2542	36.4995	45.8193	33.5042	36.2784	58.0201	52.6829
TGME49_235360	X	4800876	4803147	1665	16.9304	18.5896	27.5144	17.08	19.0039	20.3505	24.2153	23.7491
TGME49_235370	X	4805969	4813984	6018	195.396	167.645	132.474	137.953	125.326	148.576	158.258	139.574
TGME49_235380	X	4815588	4824092	3020	99.7866	91.1849	92.866	90.5278	103.285	108.117	116.163	107.867
TGME49_235390	X	4825566	4833703	3963	0.451625	0.344565	3.38335	4.89267	6.0209	4.66362	8.19943	6.6985
TGME49_235398	X	4835329	4844389	2581	53.8289	65.3393	68.8334	54.8409	57.0766	54.8992	48.1631	46.1176
TGME49_235402	X	4844654	4853315	5793	8.4577	10.0573	7.90807	11.1569	8.71537	7.29922	12.3348	11.0083
TGME49_235420	X	4853714	4868399	13045	31.9507	43.9469	24.5826	27.0519	23.5002	23.3554	36.9725	30.6751
TGME49_235430	X	4868579	4870950	2372	7.35684	8.4433	4.23953	10.6267	5.61284	9.91671	16.1899	8.43077
TGME49_235440	X	4871562	4873062	958	46.9399	50.1258	72.8961	54.9845	61.5453	54.0766	75.4217	69.3538
TGME49_235450	X	4876485	4880394	1519	221.956	218.146	221.411	248.487	200.451	230.07	270.947	237.734
TGME49_235460	X	4880947	4883510	1914	32.6117	26.7538	27.1457	30.2224	32.7922	35.8449	51.015	41.2663
TGME49_235470	X	4882802	4892544	6564	515.239	538.071	487.692	473.171	474.803	496.066	476.247	472.574
TGME49_235478	X	4893085	4903944	6842	23.6084	23.6167	18.6171	19.6957	18.8522	17.3535	22.3926	20.651
TGME49_235490	X	4904178	4916517	5085	46.8125	55.5872	33.3997	40.0376	26.3182	32.3809	38.3257	33.0862
TGME49_235500	X	4916752	4920122	2479	46.2067	51.5946	50.9321	48.624	43.7318	42.6991	52.1093	51.185
TGME49_235515	X	4921510	4930959	3276	7.71696	9.44799	10.5732	14.7967	11.8225	9.7446	13.5745	13.162
TGME49_235540	X	4934499	4939245	1818	411.883	475.951	660.7	692.005	484.665	495.673	359.362	429.965
TGME49_235550	X	4939471	4945396	2340	17.5919	16.2422	19.5775	22.787	20.4678	19.0276	25.794	21.1176
TGME49_235560	X	4946014	4954632	2845	17.0643	13.5991	12.5678	18.7422	13.7959	16.1423	22.5064	22.2204
TGME49_235580	X	4960872	4969649	2115	0	0.215211	0.528299	0	0.327006	0.529606	0.905971	0.92885
TGME49_235600	X	4974937	4975829	893	0	0	2.50247	2.53317	2.71071	0	3.03977	2.19991
TGME49_235610	X	4978043	4988295	4951	13.014	11.9516	19.6343	16.2527	10.5468	15.045	11.2235	10.1029
TGME49_235620	X	4988491	4991014	2524	68.2516	76.1022	75.7002	79.6378	69.7372	81.4348	80.3132	85.4572
TGME49_235630	X	4998667	5000363	1697	155.433	162.542	126.089	108.545	126.342	119.8	108.867	113.835
TGME49_235635	X	5002025	5003701	1365	24.585	25.6763	30.2872	24.385	23.3073	18.2583	16.2017	21.6988
TGME49_235640	X	5006299	5011989	3152	14.6925	16.8234	9.92572	14.7637	8.61231	12.7932	10.7651	8.48593
TGME49_235650	X	5014291	5022753	2952	0.606297	0.462572	5.29909	4.92623	3.3386	2.6561	3.0832	5.05087
TGME49_235660	X	5022545	5029402	2758	39.9912	39.5262	45.3747	48.2749	32.2864	36.349	34.8824	35.1948
TGME49_235670	X	5032697	5038557	4790	8.59397	8.07714	6.76476	8.90547	10.9735	9.76302	11.0841	9.7169
TGME49_235680	X	5041113	5060270	7141	131.866	150.874	117.118	122.639	99.8057	110.545	167.85	145.826
TGME49_235690	X	5061898	5064200	1971	648.242	673.519	432.542	484.823	649.335	626.549	594.476	614.715
TGME49_235700	X	5065023	5070500	2076	45.693	56.3482	50.8621	58.3744	47.0573	55.1695	60.1867	58.6706
TGME49_235710	X	5072530	5075374	2007	61.7553	62.1409	64.0237	64.4067	47.2106	42.8345	51.7142	46.8585
TGME49_235720	X	5075525	5078079	2360	21.8984	24.7837	22.2523	20.266	20.2943	16.6119	24.3237	21.1734
TGME49_235730	X	5079066	5082050	2985	27.5813	31.1071	32.9404	31.8289	20.1577	19.982	25.757	21.2795
TGME49_235740	X	5081681	5088167	3672	39.8462	48.3433	42.2963	45.4115	32.5373	39.8081	48.4207	43.8288
TGME49_235750	X	5090031	5099902	6107	16.5219	16.4717	15.9177	16.7216	13.3635	17.6996	20.5643	16.9997
TGME49_235860	X	5103264	5110221	4511	1.09109	0.605414	1.98156	3.00881	5.44279	5.89731	5.07952	5.59443
TGME49_235870	X	5111016	5111923	908	0.492783	0	2.46113	0	1.14254	1.23361	1.75856	2.27452
TGME49_235875	X	5111999	5114087	1614	0	0	1.38457	0	1.28554	1.041	1.03879	1.09233
TGME49_235880	X	5114603	5116855	2253	120.749	121.419	128.448	135.69	111.739	114.597	99.3643	107.116
TGME49_235890	X	5117867	5122301	1844	8.00746	9.50329	13.3307	20.1537	13.4085	15.0341	18.7907	12.8935
TGME49_235905	X	5122459	5136159	4296	9.53012	11.178	17.036	21.8901	11.0279	11.8634	11.0949	10.0487
TGME49_235920	X	5140328	5184564	13491	17.2133	17.1056	18.7178	17.5821	22.2234	25.0119	22.2336	20.7373
TGME49_235930	X	5185850	5193708	3278	480.548	517.795	477.38	496.275	389.642	385.702	382.485	397.308
TGME49_235940	X	5195846	5196371	526	0	0	0	0	0	0	3.79462	1.91529
TGME49_235950	X	5196899	5202257	4101	0.109107	0	3.81442	2.52161	1.51782	2.04849	3.13437	2.14951
TGME49_235960	X	5203513	5207354	3283	17.4454	17.0533	27.3978	26.0852	23.9106	26.9538	24.7322	25.2705
TGME49_235970	X	5208083	5215633	2684	291.074	264.725	414.428	406.961	243.831	255.928	197.663	195.483
TGME49_235980	X	5217397	5224974	4498	30.2907	32.1797	40.3668	37.3596	23.6792	23.3461	26.4472	24.6374
TGME49_235990	X	5224707	5233946	4396	19.0338	24.5912	24.0195	23.7445	21.3967	16.7533	30.5116	26.1257
TGME49_236000	X	5234135	5238520	1999	33.0157	36.2042	12.297	30.554	27.0731	37.1224	43.2543	37.3949
TGME49_236010	X	5238511	5242985	4475	76.091	72.1662	89.1385	84.78	93.5809	103.126	170.293	161.09
TGME49_236020	X	5242741	5245842	3102	0	0.146735	0.720407	0.625069	0.222959	1.26383	3.0628	2.58194
TGME49_236030	X	5246847	5248655	567	84.0443	108.775	92.62	75.2332	73.797	70.6246	112.788	102.432
TGME49_236040	X	5249795	5253227	2696	562.296	656.418	377.977	416.057	673.276	565.459	476.693	585.428
TGME49_236050	X	5253244	5255771	1681	69.4727	69.995	65.4724	63.0557	113.864	129.936	150.036	145.004
TGME49_236060	X	5255418	5258604	2441	168.09	188.986	68.8904	72.2842	132.104	144.087	160.561	169.256
TGME49_236070	X	5260465	5265701	1014	222.62	233.196	146.005	140.546	252.536	214.855	421.633	393.291
TGME49_236080	X	5266647	5277579	4618	56.2942	60.9128	57.3435	64.7301	51.145	57.0609	69.0161	58.444
TGME49_236110	X	5279764	5287618	2517	62.4861	66.0061	85.455	63.2969	54.2001	53.4024	58.8085	57.6169
TGME49_236120	X	5288136	5290808	1769	1.26469	2.05843	0.631629	3.28824	2.73676	3.79915	4.64861	5.15397
TGME49_236130	X	5292353	5295862	987	30.6005	49.5753	56.0374	50.4222	33.4597	31.7764	29.7676	33.0711
TGME49_236140	X	5297922	5302241	3972	11.0397	14.3244	21.098	16.0279	9.92503	12.4786	12.5024	12.5931
TGME49_236150	X	5301769	5303320	1552	27.3888	40.9126	33.4774	43.5184	18.8279	26.5234	31.0198	27.7502
TGME49_236160	X	5302544	5312384	3808	44.7682	58.0319	41.9594	50.7484	43.6348	39.1952	53.3167	50.5707
TGME49_236153	X	5306976	5307048	73	104.2	121.587	61.2248	66.4029	52.1082	46.0322	99.525	70.3831
TGME49_236158	X	5308393	5308465	73	0	0	0	0	16.5799	0	6.56209	14.4906
TGME49_236190	X	5312526	5315066	2141	68.8621	72.8146	117.424	90.8653	77.2861	85.2774	78.7573	83.2636
TGME49_236200	X	5315154	5326619	5740	32.857	42.5434	25.5005	23.9837	25.3935	25.4661	41.8388	39.2008
TGME49_236210	X	5326852	5334017	3069	178.964	199.48	218.082	235.026	174.595	157.488	152.445	160.472
TGME49_236220	X	5334148	5340939	2490	23.0013	24.1295	30.9628	38.2861	20.8319	20.8054	18.7252	18.4294
TGME49_236230	X	5343325	5344925	1601	16.629	14.2152	3.8385	7.46842	9.28781	7.8709	14.0628	9.31304
TGME49_236240	X	5343752	5351493	5169	33.3702	34.4746	20.1033	23.132	20.5385	20.0988	25.2073	23.6025
TGME49_236250	X	5351656	5359715	5695	12.4138	14.4664	14.1263	16.8532	13.0855	12.932	13.2901	12.9491
TGME49_236260	X	5360245	5367366	4910	21.6889	27.301	25.9426	17.6389	20.4246	22.6419	20.602	21.5031
TGME49_236270	X	5370000	5374110	2600	21.684	26.0848	21.4875	26.8472	20.3495	25.9565	20.1746	19.2577
TGME49_236280	X	5375077	5378167	1972	17.3579	19.0424	21.8144	23.9257	15.4316	12.2122	17.7329	16.7567
TGME49_236290	X	5379971	5382460	1291	0.693179	1.41029	5.19296	6.50827	7.23226	1.30145	4.32898	6.12583
TGME49_236400	X	5384220	5386959	1622	4.13792	4.48997	6.88873	6.57478	9.06096	7.07842	9.84448	11.18
TGME49_236510	X	5388845	5397004	4870	38.2213	43.3674	26.6145	35.0367	31.7406	35.708	51.7886	40.7115
TGME49_236520	X	5395782	5400896	3856	27.5013	36.9472	33.1786	31.1763	29.9085	33.2607	51.6591	41.7243
TGME49_236530	X	5402327	5405138	2812	42.8034	46.4559	44.5033	44.13	35.5401	47.4018	43.0993	43.6189
TGME49_236540	X	5406370	5415399	3986	301.123	359.249	406.463	401.154	304.47	314.242	320.356	315.111
TGME49_236550	X	5416820	5419541	1702	435.091	454.903	494.996	522.905	472.795	478.452	426.541	445.862
TGME49_236560	X	5419418	5431331	11914	23.4352	25.7691	16.975	18.9329	18.0393	18.7093	29.5927	25.0424
TGME49_236570	X	5431604	5435554	2510	237.628	225.772	315.619	306.938	248.542	261.286	236.144	242.309
TGME49_236580	X	5435593	5438124	1222	640.413	620.738	672.514	704.765	706.899	696.177	531.626	579.94
TGME49_236595	X	5440377	5447731	2761	0.16206	0.494572	1.21407	0.468179	0.500991	0.811385	2.68924	2.26228
TGME49_236620	X	5450103	5458330	3051	75.1611	65.2695	39.9185	47.5579	118.67	112.434	150.519	131.09
TGME49_236630	X	5457631	5461658	3662	215.476	205.461	170.257	163.963	200.856	200.196	256.216	237.844
TGME49_236635	X	5462196	5463468	507	0.882538	1.79555	0	3.18699	2.04621	3.31395	3.93682	4.76897
TGME49_236640	X	5463823	5470148	3500	67.5645	63.7889	50.4405	60.3849	52.4642	56.8859	74.4097	66.7648
TGME49_236650	X	5470422	5476984	4597	483.899	440.616	512.251	545.936	403.995	433.841	609.602	554.774
TGME49_236660	X	5475649	5484929	7861	40.47	45.7429	33.829	37.1629	38.3817	34.9101	48.4253	47.7578
TGME49_236670	X	5487118	5493013	5156	12.4966	11.3881	13.6527	17.9255	9.32262	12.2744	14.9736	14.0292
TGME49_236780	X	5494125	5503906	5102	18.154	20.5639	24.0903	20.6488	14.2675	14.4899	15.5233	14.1876
TGME49_236790	X	5503772	5510576	3160	22.7971	23.5508	20.5084	25.9756	21.8866	21.3566	27.1603	27.7844
TGME49_236800	X	5512989	5521404	2380	26.2264	23.8104	29.1075	23.2187	25.2092	24.2378	18.2488	22.7098
TGME49_236820	X	5523084	5527153	3111	42.5729	51.7938	43.4586	46.5368	43.7958	39.9656	50.1975	50.858
TGME49_236830	X	5527370	5528057	688	75.7668	59.8735	74.7067	74.2142	50.5143	103.79	78.7943	77.0227
TGME49_236840	X	5527370	5533629	3107	75.1746	92.587	80.7356	94.8576	63.7192	67.7766	72.4895	69.8272
TGME49_236850	X	5535453	5546629	9647	23.2374	30.9046	17.1419	22.4775	18.9627	22.5544	21.6252	21.4919
TGME49_236860	X	5549568	5557719	7422	16.9707	15.7918	14.7535	13.1929	19.3825	23.4678	26.9033	24.8943
TGME49_236870	X	5562319	5562963	645	811.648	669.348	834.116	674.88	1000.43	999.422	1196.96	1163.87
TGME49_236880	X	5563265	5564194	930	5.77351	7.83089	8.41018	9.0346	11.7129	13.8509	34.8543	24.3195
TGME49_236890	X	5564292	5565969	1314	374.405	350.211	221.089	212.243	285.016	277.046	526.182	479.916
TGME49_236900	X	5566865	5568235	1028	0	0.885546	8.69535	8.17332	7.90517	6.81005	20.6587	19.9921
TGME49_236910	X	5568005	5571017	2511	232.901	211.362	274.999	252.892	228.542	254.156	203.047	213.646
TGME49_236920	X	5571788	5573975	1319	232.374	204.81	252.865	261.665	214.984	242.239	254.043	243.307
TGME49_236930	X	5574996	5596895	17316	5.01298	7.92527	9.09833	7.09177	5.412	5.66009	5.94779	4.91912
TGME49_236940	X	5599024	5601850	2768	0	0	2.82567	1.63448	0.749586	2.22566	1.75945	1.92899
TGME49_236950	X	5602167	5604219	1402	1659.26	1331.42	2941.62	2662.96	2045.5	2209.07	1309.2	1412.87
TGME49_236960	X	5604547	5611295	3458	118.461	106.421	100.975	100.742	129.553	127.382	108.86	107.372
TGME49_236970	X	5611201	5627261	13204	41.7999	49.2608	48.0654	51.3719	30.1313	30.4545	49.5576	42.5669
TGME49_236975	X	5636081	5638349	2269	0	0	0	0	0	0	0.140747	0.222002
TGME49_236980	X	5639916	5649262	5558	19.1602	16.0514	9.34812	12.966	10.6082	12.1423	16.0597	13.8755
TGME49_236990	X	5650329	5656007	5679	20.1702	16.5509	23.4134	26.4037	16.3497	23.422	22.8874	20.7645
TGME49_237000	X	5655985	5662940	2556	83.6775	68.2934	62.9494	65.6183	52.0878	56.9699	53.2258	51.2591
TGME49_237010	X	5663970	5672444	4520	53.5551	48.0346	87.633	90.5136	49.9587	56.3775	71.6959	59.7669
TGME49_237015	X	5673947	5674741	795	743.494	694.493	659.167	666.646	708.365	785.138	1134.21	1136.7
TGME49_237020	X	5675065	5683052	4930	33.6266	28.5751	44.6487	41.3619	29.3201	36.2391	62.2191	47.5318
TGME49_237045	X	5684075	5689289	4144	0	0.109838	0	0.623862	0.417241	0.405448	1.23303	1.20339
TGME49_237060	X	5691098	5691439	342	0	0	0	0	0	0	0.466893	0
TGME49_237070	X	5695427	5696748	1322	1.69231	2.06583	6.76159	1.46669	10.9864	7.20196	14.011	13.4885
TGME49_237080	X	5698271	5699944	1674	0.534584	0.815718	2.6699	3.47485	12.188	5.35301	3.91086	5.83764
TGME49_237090	X	5702208	5712159	7473	63.767	72.4814	48.9673	56.1304	43.3129	46.5404	59.3368	52.6168
TGME49_237100	X	5713345	5721649	6919	10.9938	9.73627	11.0621	9.24784	7.79682	8.17544	16.1316	13.5413
TGME49_237110	X	5721780	5731283	3113	57.3503	54.3193	66.5817	69.968	51.988	57.661	60.9113	58.8188
TGME49_237130	X	5732557	5734753	1550	99.0157	65.1922	302.045	198.066	319.706	253.652	139.074	132.82
TGME49_237120	X	5732625	5733766	495	109.376	66.6664	283.288	215.44	369.911	265.886	167.258	157.935
TGME49_237140	X	5736261	5741107	1453	78.9884	91.4727	96.1246	100.751	86.3928	91.3515	81.9267	84.8666
TGME49_237150	X	5742168	5748941	3380	286.273	270.476	234.379	297.442	225.287	239.516	283.9	264.782
TGME49_237160	X	5749982	5760806	7209	14.679	16.1636	17.5143	12.8655	11.9683	9.16727	16.2136	12.1441
TGME49_237170	X	5763081	5768770	2372	28.2012	27.8245	49.9323	33.9237	43.8093	38.1321	53.5512	65.2588
TGME49_237180	X	5768861	5770750	1890	165.248	178.215	162.873	154.912	244.902	257.508	192.458	194.853
TGME49_237190	X	5770914	5773420	1383	82.9864	70.5959	58.5741	77.5772	87.89	103.062	94.8482	90.3277
TGME49_237195	X	5772580	5777583	4102	23.5068	24.19	16.4797	21.5861	28.5786	32.29	26.7037	26.5737
TGME49_237200	X	5778070	5780719	2650	162.432	144.968	130.709	129.264	164.031	189.997	175.555	170.657
TGME49_237210	X	5780699	5786920	4723	45.9952	44.1389	33.3573	37.5641	45.2488	50.2191	50.831	50.0203
TGME49_237220	X	5789218	5798093	3280	139.827	177.281	181.229	189.069	117.449	109.877	109.559	113.952
TGME49_237230	X	5797693	5802421	3615	556.493	621.248	332.733	338.179	412.866	392.97	670.645	623.431
TGME49_237240	X	5802477	5807501	1939	126.688	130.401	151.554	154.664	143.656	159.583	205.423	204.243
TGME49_237250	X	5807704	5812200	3130	126.229	129.426	159.392	162.097	131.86	132.857	131.211	128.377
TGME49_237260	X	5812331	5817418	2720	75.4244	69.3633	86.4715	92.6711	82.6382	84.5235	93.5463	89.5404
TGME49_237270	X	5818382	5820268	1887	23.9492	25.2069	13.0269	15.0706	20.3417	19.8855	31.0977	28.6697
TGME49_237280	X	5821774	5831583	7968	52.9266	59.724	30.2195	36.3799	34.0688	35.1442	48.1156	40.9338
TGME49_237290	X	5832115	5845459	12290	19.9149	25.5177	20.5469	25.2691	16.0383	18.4559	24.9001	21.2268
TGME49_237410	X	5845468	5856571	9910	16.277	18.6018	12.7971	16.3048	13.4869	13.8178	16.7895	14.0798
TGME49_237425	X	5860743	5881975	13488	2.6539	3.34089	2.73373	2.37195	1.60239	2.2007	1.77577	1.79261
TGME49_237450	X	5883080	5889519	4094	3.16951	4.4472	6.55018	9.07755	3.46316	5.40359	14.2165	9.36328
TGME49_237460	X	5889864	5893511	2997	21.2004	18.6807	27.2161	21.9969	13.2693	16.0711	29.49	24.455
TGME49_237470	X	5893552	5902996	4686	34.7569	38.0766	43.2777	46.688	30.404	34.421	50.5679	43.3528
TGME49_237480	X	5903951	5916153	8543	12.9892	16.2237	9.74397	11.3861	9.33033	9.01416	11.2894	10.4306
TGME49_237490	X	5917313	5920045	2127	1.05183	0.855986	1.05064	0.911596	4.06452	2.10647	2.85272	3.19711
TGME49_237500	X	5921955	5935130	7436	53.0426	54.1418	38.918	33.5503	35.2738	33.6291	51.1393	46.5313
TGME49_237510	X	5934634	5943855	8351	9.10861	10.0289	14.8516	16.6398	15.3214	13.3459	25.7079	21.7992
TGME49_237520	X	5947280	5952562	5283	27.6955	35.9708	28.5524	31.7472	26.7064	22.7394	39.7456	33.6673
TGME49_237530	X	5953083	5965485	3824	25.6837	25.5915	21.6224	23.6624	27.1294	28.413	24.6155	25.2388
TGME49_237540	X	5966766	5968619	1854	43.3208	39.4039	42.187	46.365	37.8637	34.1352	67.3935	61.24
TGME49_237550	X	5968683	5974779	4470	23.1231	26.4243	20.4973	28.629	19.4179	25.4344	51.3325	42.5854
TGME49_237560	X	5985997	5989723	2282	376.467	316.745	454.138	451.887	362.099	387.28	371.17	356.888
TGME49_237570	X	5991008	5998659	2467	68.1962	69.1889	98.7364	100.996	76.5349	78.4354	102.395	96.6608
TGME49_237585	X	5999019	6005349	4974	1.34936	0.73208	0.673916	0.71467	4.24092	4.39129	17.0464	11.5044
TGME49_237595	X	6005351	6008055	1733	15.4915	8.53609	10.316	12.8668	10.9749	12.6037	24.6012	19.6199
TGME49_237600	X	6007339	6012387	3989	36.1749	35.8294	41.316	41.2356	25.9638	29.1331	39.489	36.6458
TGME49_214070	X	6012596	6014002	1407	69.8043	48.8492	37.7215	38.816	42.2737	40.2032	66.3337	58.2485
TGME49_214080	X	6013511	6015281	1771	407.781	342.47	335.016	301.811	297.189	279.239	318.588	367.794
TGME49_214090	X	6018230	6030875	5580	67.7185	94.0115	48.0581	55.1921	50.384	52.2922	85.5476	73.5724
TGME49_214100	X	6031183	6033548	2366	161.977	181.222	150.177	145.6	126.865	123.445	172.939	140.259
TGME49_214110	X	6035131	6041102	3846	36.5892	32.7235	32.6839	43.6931	30.5707	35.8228	46.0225	36.607
TGME49_214115	X	6041920	6043064	246	5.45667	0	0	5.25464	2.81146	25.0433	4.86821	4.50483
TGME49_214120	X	6041987	6047813	5827	7.29491	8.35821	4.6021	5.98959	5.45983	6.43966	8.67306	7.14046
TGME49_214130	X	6049766	6057000	7235	18.4916	22.3968	19.1502	19.5638	19.2382	24.384	27.1904	25.1478
TGME49_214140	X	6056164	6071141	13324	41.1548	50.3885	50.2322	51.0547	37.9705	37.5152	48.5719	45.6276
TGME49_214150	X	6071264	6074503	1698	97.5002	114.061	87.5193	83.3595	51.5251	57.8859	67.8958	65.1457
TGME49_214170	X	6074796	6085052	5951	20.4513	23.0989	28.821	30.7358	22.7789	21.1281	26.8052	24.4709
TGME49_214160	X	6075021	6075821	801	17.0376	11.3651	18.1343	37.5205	23.313	17.8296	29.6031	25.7207
TGME49_214180	X	6085149	6094665	4169	124.124	135.055	110.958	119.606	118.988	102.165	114.233	112.235
TGME49_214190	X	6095090	6098295	3206	31.4022	31.5184	25.4419	26.6109	26.3186	30.3088	30.78	32.3036
TGME49_214200	X	6099447	6110382	5348	20.6237	27.4907	35.9358	32.2677	20.918	21.73	18.5116	20.1658
TGME49_214210	X	6112401	6119771	3344	249.08	303.946	325.783	327.799	213.183	196.288	216.835	216.402
TGME49_214220	X	6120210	6122527	639	1676	1606.63	1707.5	1801.41	2459.9	1875.19	2531.35	2802.56
TGME49_214230	X	6125440	6148189	10744	9.39122	9.72279	8.99581	10.1063	6.38897	7.74094	7.60192	6.52157
TGME49_214240	X	6150038	6173504	9670	19.7117	22.8762	18.7188	18.7814	16.0746	16.5064	18.1639	17.1432
TGME49_214250	X	6175749	6177541	1142	535.017	420.096	697.611	685.938	708.273	726.555	569.987	600.585
TGME49_214260	X	6179040	6194315	5889	21.9203	23.6126	19.7325	25.2975	22.4021	20.9225	28.7414	24.4291
TGME49_214270	X	6194415	6207195	5524	127.09	170.648	168.392	161.405	116.063	97.7364	72.4676	84.1027
TGME49_214280	X	6209523	6216057	4567	22.9259	18.5377	16.6367	19.2467	15.7496	15.9421	23.5653	19.0481
TGME49_214290	X	6216689	6219351	1606	431.148	350.873	504.409	509.692	326.861	362.329	308.368	300.163
TGME49_214295	X	6219369	6220313	348	10.2861	9.15573	19.2647	32.5018	24.8426	32.9919	61.0261	47.3325
TGME49_214300	X	6220703	6243766	8830	20.6241	23.6349	20.8792	28.4733	15.0973	19.4403	25.8233	21.7291
TGME49_214310	X	6244240	6248021	3369	33.2033	30.2637	34.1607	38.7524	32.4356	39.8973	55.2638	51.5684
TGME49_214320	X	6248200	6253985	5175	250.181	218.482	240.528	232.488	220.75	260.928	304.745	282.591
TGME49_214330	X	6252310	6253998	1689	23.8426	22.9068	39.0312	36.3532	34.9085	31.1696	41.7392	42.7374
TGME49_214340	X	6254120	6258633	2127	48.9099	63.343	88.2535	109.24	71.2916	61.351	67.0015	67.3998
TGME49_214350	X	6260438	6265076	1811	254.484	279.109	237.538	255.531	211.285	196.995	128.421	143.023
TGME49_214360	X	6265941	6266013	73	0	0	30.6124	22.1343	0	15.3441	22.9673	14.4906
TGME49_214370	X	6266484	6271297	3535	34.4287	34.2505	25.9188	40.5893	37.32	35.172	40.9922	37.0489
TGME49_214380	X	6272079	6273394	1316	124.442	85.9498	122.688	151.267	209.167	241.727	212.762	170.829
TGME49_214385	X	6273430	6274737	620	106.088	77.8195	170.306	175.132	186.57	226.733	179.895	149.167
TGME49_214390	X	6274290	6275336	1047	72.0103	53.038	85.3755	115.128	114.609	138.811	112.476	96.1739
TGME49_214400	X	6275988	6277335	669	162.191	159.888	101.046	107.72	169.803	191.709	163.377	167.456
TGME49_214410	X	6278821	6284157	5337	94.1508	82.5994	69.5074	71.0263	105.972	109.661	225.454	209.842
TGME49_214420	X	6284906	6285520	615	2.91022	5.18081	5.4505	8.40743	11.8081	6.37465	50.1101	29.4043
TGME49_214430	X	6287630	6290450	2821	14.4338	13.5535	26.5376	36.7723	43.7624	46.4564	101.206	76.7815
TGME49_214440	X	6291065	6296710	3189	406.827	404.073	326.376	361.972	283.62	313.924	436.597	388.446
TGME49_214450	X	6294260	6294333	74	102.792	61.5096	45.2981	39.3033	42.0579	45.4101	45.3139	38.8002
TGME49_214470	X	6296826	6305786	3853	29.7872	28.1159	26.9696	24.4908	30.4254	33.2866	31.434	28.9317
TGME49_214480	X	6305975	6309758	2720	70.5716	75.2203	76.4072	68.7904	56.5118	59.1973	62.0511	58.6503
TGME49_214490	X	6310525	6320727	4955	30.477	36.2851	32.923	33.9139	29.6607	27.4095	26.86	28.0987
TGME49_214500	X	6320905	6324447	2002	65.9325	68.7758	85.392	84.9063	56.1378	55.5302	61.0954	53.1148
TGME49_214510	X	6325901	6330021	3708	1.08604	0.368261	5.72537	6.44927	7.97375	8.30723	10.2705	9.46857
TGME49_214520	X	6330833	6337375	4657	22.5789	19.5967	19.9142	21.5117	21.497	28.6824	23.2641	23.8827
TGME49_214530	X	6337807	6344762	4166	30.664	30.2646	27.223	30.6405	34.1991	39.524	36.2206	35.3549
TGME49_214540	X	6345758	6349032	2542	96.1958	87.5604	109.889	120.136	111.007	94.5181	74.2167	87.8641
TGME49_214545	X	6349202	6351692	1770	4.8031	3.60022	10.1004	5.84245	7.91258	5.69551	5.23237	5.97637
TGME49_214550	X	6352129	6353366	1064	0.630799	1.71117	6.30086	6.07445	3.25008	8.42193	2.17606	4.26081
TGME49_214560	X	6354461	6365270	5582	43.6064	54.2666	50.6431	57.4302	35.157	32.4577	44.2531	39.6426
TGME49_214570	X	6369464	6372389	2492	0	0	1.7935	1.03743	0.693838	0.224742	1.05725	1.13196
TGME49_214575	X	6372606	6374305	1608	213.984	167.858	632.332	614.568	530.434	560.058	399.293	402.539
TGME49_214580	X	6374369	6384133	3660	32.7639	25.992	35.7186	48.8273	25.0381	26.1667	39.3522	37.2975
TGME49_214590	X	6387059	6394938	3029	55.6908	57.6289	51.6439	60.9194	38.4169	35.593	43.6754	48.9421
TGME49_214600	X	6395950	6414462	13010	16.1645	17.738	12.8826	16.8411	11.0574	11.3002	13.6112	10.4965
TGME49_214610	X	6416564	6435403	11828	9.07907	11.0445	7.84073	10.8194	7.22141	6.7474	8.56572	7.37186
TGME49_214620	X	6438256	6447551	3589	32.851	38.6813	37.9819	38.538	29.4357	38.7	45.1137	40.702
TGME49_214630	X	6447651	6455592	6768	11.3052	17.4186	10.9787	12.2713	10.7299	10.8404	10.782	11.8265
TGME49_214740	X	6456903	6465126	8224	24.0481	30.8281	37.0911	34.6187	29.2659	27.5126	38.5602	35.3598
TGME49_214750	X	6465191	6476139	5011	54.8259	70.3058	59.0897	64.4902	54.5524	61.8623	77.3054	68.9489
TGME49_214760	X	6478601	6483432	2067	22.5131	22.241	28.1095	23.4514	21.9163	23.0309	32.0977	28.7319
TGME49_214770	X	6485818	6490956	2078	180.981	179.505	215.62	216.633	195.204	175.321	148.996	150.389
TGME49_214780	X	6491061	6495042	1726	50.0332	46.6774	52.7602	50.3651	51.2903	63.112	44.4987	48.9714
TGME49_214783	X	6495363	6495938	183	0	2.48727	0	0	1.88967	6.12085	2.61766	0
TGME49_214787	X	6496087	6496293	207	0	0	0	3.12233	1.67057	8.11679	3.08555	1.46006
TGME49_214790	X	6496335	6500162	2659	357.503	418.281	439.335	460.738	367.268	341.638	258.703	300.301
TGME49_214800	X	6499310	6503925	4616	8.96639	13.4106	28.079	25.4832	20.6766	25.2973	27.397	26.1028
TGME49_214810	X	6506242	6509997	3038	25.6273	24.122	26.8488	24.8912	26.4081	27.7448	33.5333	29.3976
TGME49_214820	X	6511088	6515660	3167	48.3898	61.9446	63.506	56.5302	47.3345	36.2526	63.5785	56.4799
TGME49_214830	X	6517115	6529716	6970	19.965	19.5913	15.6301	16.923	13.0485	14.7849	15.4179	15.0972
TGME49_214835	X	6531517	6535038	3060	66.2397	83.9686	39.2534	45.4115	39.2143	46.1224	86.8311	71.6241
TGME49_214840	X	6532236	6545718	13483	142.152	165.975	104.003	123.411	89.344	95.9738	151.376	128.189
TGME49_214850	X	6545601	6553360	2972	19.4215	15.4685	24.8133	31.3157	15.3008	17.7138	19.1538	18.3726
TGME49_214860	X	6552858	6553202	345	16.8603	10.5547	19.4322	16.8606	15.0352	17.0452	23.6045	22.047
TGME49_214870	X	6556012	6559218	2684	23.6727	20.6896	23.3129	19.144	22.676	16.9019	20.7331	19.3306
TGME49_214880	X	6561859	6570185	7327	105.098	102.44	82.1201	84.065	83.2311	103.038	108.191	93.5671
TGME49_214900	X	6571788	6582238	8212	24.4102	27.8246	27.7569	28.7271	25.5819	21.9945	35.3791	28.155
TGME49_214910	X	6583841	6587900	3472	11.9852	11.7988	11.9073	12.193	8.06755	12.7433	14.2339	10.649
TGME49_214920	X	6588151	6603912	6012	70.109	72.9469	97.759	100.41	67.0681	62.0424	77.2093	79.2868
TGME49_214930	X	6602843	6603259	417	200.654	237.409	271.969	339.435	195.71	184	229.369	260.075
TGME49_214940	X	6604297	6609960	4029	1490.38	1518.08	1170.88	1227.75	1177.89	1199.42	1858.27	1765.22
TGME49_214950	X	6608343	6613705	3952	275.126	334.525	416.745	458.247	421.455	434.853	514.083	465.969
TGME49_214960	X	6617594	6633782	14022	8.9349	13.8447	7.96856	7.05229	8.02744	6.7501	17.3604	12.4548
TGME49_214970	X	6635768	6647446	4796	174.79	179.326	222.259	234.487	127.876	138.263	125.568	128.777
TGME49_214980	X	6648336	6654059	5416	112.977	126.105	79.0151	92.0674	64.3284	71.972	159.987	138.914
TGME49_214990	X	6660298	6672311	10311	9.50353	11.941	8.94012	9.33972	9.54152	8.2018	15.4474	12.4917
TGME49_215010	X	6676231	6683811	5587	38.3217	39.2276	41.2982	37.3656	37.5704	36.9396	51.2728	42.9521
TGME49_215020	X	6683633	6690498	2711	26.0777	23.3378	24.3171	26.5824	18.3045	19.3159	24.4434	19.8628
TGME49_215030	X	6690987	6701481	6543	16.139	18.922	14.857	17.7805	9.40761	9.8008	12.4828	12.1793
TGME49_215040	X	6703330	6719696	5206	39.7511	48.8307	34.877	38.4863	33.6775	41.4181	37.849	38.3742
TGME49_215050	X	6719701	6720537	837	18.1759	23.3839	16.0194	17.7603	18.5919	16.3936	28.0437	19.4989
TGME49_215055	X	6720467	6722496	723	5.87932	7.5547	7.72719	4.46972	12.914	21.3024	15.0181	13.5859
TGME49_215060	X	6722303	6726987	2171	154.989	155.777	169.842	143.048	165.498	177.227	116.834	115.71
TGME49_215070	X	6728749	6732472	2695	79.4447	86.474	87.0664	89.4537	69.0976	71.9036	66.7742	66.1101
TGME49_215080	X	6733411	6748576	10892	9.07875	12.2025	8.0016	7.35805	7.42924	8.14995	10.8191	8.88867
TGME49_215090	X	6748658	6755648	2197	43.0747	45.372	49.8409	54.2769	43.7574	41.297	51.2029	47.7814
TGME49_215100	X	6757807	6766994	8077	7.39559	12.2288	10.7903	10.1225	6.29366	8.4248	8.36245	8.19477
TGME49_215110	X	6767342	6767414	73	0	0	0	0	0	0	0	1.38006
TGME49_215120	X	6767908	6767980	73	0	0	0	0	4.73711	0	0	0
TGME49_215130	X	6768247	6772051	1897	64.5107	63.3448	90.1185	84.8361	66.6279	71.2989	62.7515	59.8784
TGME49_215140	X	6772324	6774627	2094	0.747882	0.869476	3.73518	2.16058	3.22028	5.88409	7.01544	5.12382
TGME49_215150	X	6774878	6783890	7830	120.919	141.463	119.869	131.534	118.14	126.889	137.245	131.553
TGME49_215160	X	6783970	6793074	8643	118.708	115.596	103.875	109.403	69.998	94.9306	139.374	121.632
TGME49_215165	X	6792330	6793508	946	5.43937	5.77384	27.7566	23.5709	8.40762	15.9847	20.5083	11.9807
TGME49_215170	X	6794836	6803396	4376	85.8902	84.4084	79.9203	85.1472	74.3616	86.0693	106.476	97.2797
TGME49_215180	X	6803363	6807879	2340	9.56083	9.62861	10.505	11.8768	39.6794	33.5078	31.6625	28.8672
TGME49_215185	X	6808401	6809960	807	1.66337	1.69208	4.15372	9.21028	13.2839	3.47	14.0484	13.9819
TGME49_215195	X	6810481	6818085	2846	3.30161	2.71887	13.7412	17.9408	45.8689	41.4238	37.5349	34.9915
TGME49_215210	X	6817414	6825113	6898	24.1951	22.6332	26.4031	23.0963	35.8944	41.0422	77.3966	64.5755
TGME49_215220	X	6825057	6829318	3676	683.89	690.309	651.079	657.31	782.492	791.791	923.814	822.947
TGME49_215230	X	6828938	6837855	3788	63.9632	86.8766	99.7004	102.289	93.5729	92.2588	124.458	113.577
TGME49_215250	X	6838037	6844055	3321	28.3612	25.6984	22.2057	22.9647	24.9907	27.2356	43.6096	35.3713
TGME49_215260	X	6844138	6869693	6569	38.9617	37.8674	33.8488	35.5186	28.1111	30.5649	31.442	28.9167
TGME49_215270	X	6869078	6869693	616	10.8956	18.8423	5.44165	15.7383	5.33309	13.6378	18.534	14.065
TGME49_215280	X	6869739	6875364	3347	108.754	110.495	122.518	124.553	120.728	133.614	113.258	113.763
TGME49_215290	X	6878013	6884760	2481	62.1304	61.2765	57.4214	59.1354	54.429	54.1773	98.8571	68.1984
TGME49_215300	X	6885895	6889240	2510	39.3076	57.8484	41.8451	46.8647	53.1113	39.9404	45.1359	46.6796
TGME49_215320	X	6889586	6895852	1490	0	0.305484	0.749901	0	1.39252	0.939695	1.76824	2.33267
TGME49_215328	X	6899401	6905971	2055	0	0	0	0	0.336554	0	0.0777019	0.24512
TGME49_215340	X	6908562	6912597	2938	1.67526	1.39433	6.46528	9.67942	9.76928	7.62503	6.7121	5.5893
TGME49_215343	X	6913359	6916916	3009	0.892217	0.756349	0.742673	2.79235	4.07983	1.30289	3.1044	3.9675
TGME49_215347	X	6917658	6920427	2164	18.8159	20.4028	59.1205	51.6699	45.4633	47.1029	48.9215	48.3005
TGME49_215350	X	6920523	6922911	1718	342.096	295.278	329.742	312.439	315.314	377.99	362.063	332.375
TGME49_215360	X	6924620	6926963	2344	126.369	114.958	85.8035	90.1651	93.3861	100.83	140.74	136.633
TGME49_215370	X	6928935	6934055	4275	29.0448	30.9836	35.0234	33.6389	29.1612	33.014	31.5433	33.3105
TGME49_215380	X	6934063	6938525	4463	21.2545	19.5816	16.1482	17.9574	22.7414	22.4626	30.5902	26.1173
TGME49_215385	X	6938922	6941008	1335	38.5441	28.299	43.5223	39.6991	40.1501	56.2156	45.5709	53.6549
TGME49_215390	X	6941053	6941542	234	255.274	210.079	248.3	214.059	365.76	495.436	357.568	348.946
TGME49_215400	X	6941701	6943384	1684	69.0833	57.0315	82.9388	73.6898	94.2555	79.4857	66.3742	74.9601
TGME49_215410	X	6944358	6946651	1637	0	0	4.09536	3.15856	1.3731	3.42125	3.85294	3.13865
TGME49_215420	X	6947680	6949574	693	139.787	132.676	174.939	161.813	117.765	147.086	119.24	110.703
TGME49_215425	X	6949600	6952082	712	410.683	361.516	497.473	485.649	416.962	404.705	320.7	353.455
TGME49_215430	X	6952370	6956461	735	338.477	266.91	383.852	392.19	286.057	308.984	287.745	304.426
TGME49_215440	X	6957771	6965480	4669	46.3355	47.1841	39.9653	33.8457	43.2169	54.7583	75.7177	64.7967
TGME49_215450	X	6967617	6971166	3031	43.7704	52.6352	68.1987	56.5078	65.5451	54.6015	47.545	52.7488
TGME49_215460	X	6971087	6973683	1737	2227.96	2560.7	2434.76	2374.5	2588.29	2547.18	1652.85	1923.45
TGME49_215470	X	6973728	6976263	1292	3088.32	3339.62	3518.1	3388.18	3682.52	3332.17	2463.94	2856.99
TGME49_215480	X	6976427	6980094	2924	36.7262	38.839	29.4241	31.3877	34.711	37.1584	58.8688	58.314
TGME49_215490	X	6980335	6983882	3345	343.845	289.091	413.203	362.481	344.93	371.196	369.072	366.595
TGME49_215500	X	6985033	6989083	1761	16.0075	18.61	40.9252	44.9599	45.1653	51.0445	46.5612	46.6537
TGME49_215510	X	6988341	6998420	7941	29.3565	28.4303	22.3724	27.7541	36.1007	36.6743	42.7596	40.8636
TGME49_215520	X	6999482	7003653	4172	61.1325	50.1866	55.4391	58.4044	52.9655	55.979	59.3432	54.6585
TGME49_215530	X	7002984	7005338	1989	658.01	567.304	439.301	382.139	628.767	604.547	389.881	437.091
TGME49_215540	X	7005991	7007263	815	4.39212	3.35095	4.11295	2.77561	12.517	19.2413	9.89412	9.70361
TGME49_215550	X	7008130	7016546	7194	10.6357	13.2236	14.2892	12.3982	7.35457	5.60525	9.18911	8.73847
TGME49_215560	X	7016893	7021377	4485	16.0622	18.6737	18.6848	21.8323	10.7945	12.7995	13.0483	10.636
TGME49_215570	X	7023177	7028123	4116	30.3842	32.8992	14.3877	19.2358	19.8277	18.0291	29.5225	27.7928
TGME49_215580	X	7028886	7029938	1053	11.2605	8.64522	7.42779	7.36548	11.9867	9.04178	17.1354	13.5857
TGME49_215590	X	7030864	7042647	4003	174.653	202.115	202.927	206.91	176.274	171.599	184.489	180.625
TGME49_215600	X	7042814	7046595	2731	47.8413	57.7505	47.2553	51.1188	49.8264	42.9631	54.2587	55.0756
TGME49_215610	X	7047652	7049220	336	557.311	508.68	711.647	756.927	555.25	553.391	480.22	513.917
TGME49_215620	X	7052347	7059349	7003	11.2453	13.7793	13.8811	14.3053	8.1971	8.59721	12.1987	10.3722
TGME49_215640	X	7059553	7069392	7677	32.9014	37.6196	20.2308	22.1418	24.3242	27.2114	33.4975	29.6774
TGME49_215650	X	7067142	7067928	531	28.6501	30.0018	27.3551	21.9092	21.491	26.3681	46.9109	37.4709
TGME49_215660	X	7070566	7075132	3388	18.4895	21.8987	24.0752	26.7075	18.1682	19.9194	17.4146	16.6074
TGME49_215670	X	7075653	7081437	5785	0.0773461	0.0786812	0.386293	0.335171	0.597768	1.06493	1.69752	1.40189
TGME49_215680	X	7083542	7086352	2229	53.6977	40.6366	39.6011	32.7655	86.2583	78.6443	73.5347	84.7221
TGME49_215690	X	7088823	7099927	6628	12.3878	18.0269	14.3293	16.6749	13.9826	13.3086	10.8893	14.4246
TGME49_215700	X	7099715	7115148	10232	13.4252	15.0359	11.5754	12.128	9.81797	10.2356	9.8862	9.01895
TGME49_215710	X	7115365	7127961	3952	27.9654	26.2599	22.7598	23.5502	15.0504	16.439	23.1112	20.9035
TGME49_215730	X	7131665	7136918	2907	39.5576	36.7957	53.4269	50.4695	45.2038	44.6968	41.2514	38.9531
TGME49_215740	X	7137243	7146247	3394	32.4313	35.5393	49.3821	43.7038	35.2024	29.62	37.3553	38.4693
TGME49_215750	X	7146959	7150372	2079	14.4199	21.2369	17.467	26.2694	13.8057	16.0286	25.4608	23.9141
TGME49_215775	X	7152522	7155156	2635	517.239	512.607	425.315	390.491	503.687	473.127	484.516	492.099
TGME49_215785	X	7156314	7158042	1729	405.264	351.974	250.742	252.697	312.608	336.229	352.879	336.203
TGME49_275310	X	7165282	7171329	4848	59.5304	65.1585	36.6458	45.5944	57.7418	55.6824	76.5615	69.2307
TGME49_275320	X	7171322	7184696	4836	106.357	103.628	78.0945	87.8067	76.5485	86.7419	113.303	97.1093
TGME49_275330	X	7184903	7191263	5787	15.2706	14.8656	22.7834	17.6462	15.1781	13.7426	17.4522	16.8604
TGME49_275350	X	7191411	7199497	7374	18.6891	15.9254	14.5465	17.3983	15.1708	18.8737	16.8577	14.031
TGME49_275340	X	7191803	7191884	82	0	0	0	0	0	0	1.94729	1.22859
TGME49_275355	X	7200230	7201859	1630	3.5686	3.0717	6.16943	3.96516	13.0474	11.5104	20.1801	19.809
TGME49_275360	X	7206568	7208669	1428	1.56669	1.59374	1.56492	3.16824	11.5028	7.05956	12.7474	13.9688
TGME49_275370	X	7210278	7212425	1564	41.6263	35.6512	44.294	49.7965	46.211	43.6874	28.9951	35.6213
TGME49_275380	X	7214177	7215852	1131	0.395621	0.40245	0	1.14292	3.21043	0.990377	0.494139	1.69244
TGME49_275390	X	7220977	7221285	309	18.8246	32.407	65.0885	50.1997	58.1944	23.5623	27.6464	28.528
TGME49_275400	X	7221481	7225161	3105	2.44979	1.75911	1.79928	1.8734	1.11372	2.43504	4.21692	2.83901
TGME49_275410	X	7225239	7236533	9555	4.23799	6.47862	4.67756	6.45983	4.43345	3.57546	5.36436	5.5565
TGME49_275420	X	7238577	7252500	10404	10.4077	13.9561	10.2027	11.8964	9.37314	8.77446	9.64603	8.79239
TGME49_275430	X	7252667	7269791	9519	17.6271	23.6216	21.3634	20.8107	13.2417	15.415	13.6797	14.5682
TGME49_275440	X	7270767	7274201	3435	4020.25	4421.85	3360.19	3209.97	3772.34	3789.65	4507.3	4542.2
TGME49_275450	X	7274541	7278576	3287	87.8014	102.126	64.0769	71.9664	48.6573	52.9048	88.4857	74.5393
TGME49_275460	X	7283312	7285936	2625	121.024	105.946	58.3151	69.1872	108.222	101.024	154.324	149.831
TGME49_275470	X	7286295	7289755	3461	182.676	146.638	197.094	199.163	144.778	158.179	255.894	231.514
TGME49_275480	X	7288020	7303451	6248	143.515	133.426	162.381	183.873	133.027	137.639	194.358	171.546
TGME49_275490	X	7304624	7318369	8065	21.554	28.4729	28.4707	27.2873	17.4512	18.1246	20.6898	20.1052
TGME49_207005	X	7328744	7330650	1399	0.9595	2.92819	1.59736	1.84795	1.97746	1.60131	0.798958	1.51225
TGME49_207010	X	7333085	7334938	1110	3.22484	2.46038	2.01325	3.49363	2.80386	2.52278	2.30166	2.58668
TGME49_296640	X	7337201	7337794	594	3.01311	0	5.64319	1.08808	0.58217	0.942859	2.15054	0.848017
TGME49_207015	X	7338882	7341115	1725	0.25939	0	0.64774	1.12404	1.00234	1.29869	0.2777	0.584026
TGME49_207020	X	7342647	7344848	426	80.8766	79.0672	106.227	103.169	81.1758	76.9094	105.515	84.7814
TGME49_207030	X	7345678	7346383	706	3.16889	5.15774	1.58265	6.86602	8.32685	5.15634	10.517	6.84948
TGME49_207040	X	7346617	7357299	4745	11.363	13.8614	10.3611	10.4882	8.63612	8.73431	10.6003	10.308
TGME49_207050	X	7358271	7360579	2309	0.775136	0	0.967823	0.559828	0.449297	3.39576	2.28209	2.22519
TGME49_207060	X	7362232	7366484	2059	642.703	675.903	771.402	772.352	521.569	566.178	569.457	562.584
TGME49_207065	X	7366496	7369068	665	68.631	64.6822	114.256	159.879	89.4423	89.2724	103.01	103.699
TGME49_207070	X	7369517	7373231	1536	24.1785	24.2995	20.0047	17.2521	16.7726	19.6895	34.4097	24.7598
TGME49_207080	X	7373448	7384596	7082	13.2048	17.5461	15.304	10.769	9.13108	8.89672	10.9353	11.7644
TGME49_207100	X	7385717	7396443	6281	18.6288	21.1969	22.7704	20.6317	15.5259	14.3559	15.1008	14.4115
TGME49_207110	X	7398212	7399069	858	0.5215	1.85676	1.30228	2.25986	0.403041	0	2.69851	1.76127
TGME49_207120	X	7399187	7412576	12683	6.8089	7.0341	6.34308	6.75215	4.59425	2.38454	5.57102	5.35376
TGME49_207130	X	7412698	7413937	1104	0.810592	1.23688	4.04838	4.09805	3.60218	0.507299	3.6882	4.60833
TGME49_207140	X	7415207	7416446	1104	10.1324	4.94751	18.7237	12.8796	23.1792	29.1697	23.0693	21.3991
TGME49_207150	X	7417696	7418451	591	2.2713	0	13.2343	9.84246	8.19175	2.84293	31.4762	27.7005
TGME49_207160	X	7420833	7423105	2143	0.626384	1.06199	3.64977	3.92075	8.87517	5.4882	14.2316	12.834
TGME49_207170	X	7424962	7428422	1661	219.683	241.698	365.948	326.857	269.09	268.396	198.131	219.624
TGME49_207180	X	7428848	7437577	6344	13.4714	12.2689	12.6812	16.1988	8.58526	9.71097	16.2345	13.6809
TGME49_207200	X	7437695	7446821	5883	10.496	13.2304	9.11659	8.62421	6.75982	8.99635	8.99763	8.12566
TGME49_207210	X	7452068	7452913	846	2.11559	5.9183	9.24523	6.87576	11.854	10.5921	40.3912	41.5601
TGME49_207230	X	7453471	7458824	5098	19.9236	24.5531	21.6983	23.264	25.7424	23.7843	45.4789	41.9736
TGME49_207240	X	7458704	7462565	3500	112.948	102.869	69.5951	72.2033	97.1229	109.531	111.843	112.388
TGME49_207250	X	7462008	7468575	2599	9.46887	9.80745	12.2526	14.2991	24.7482	21.118	25.7425	22.87
TGME49_301890	X	7480404	7483911	2605	9.27529	6.81446	12.8678	12.9016	36.904	28.9166	32.3339	41.1679
TGME49_276230	III	34754	35745	657	71.8503	48.1497	28.9117	39.8417	30.2649	30.2619	18.8356	17.5574
TGME49_276220	III	38037	42323	4287	29.2766	27.3931	23.718	21.8606	23.0701	26.2589	25.7748	28.4115
TGME49_276210	III	43015	48181	4634	49.0029	44.4464	45.0895	41.9119	45.8193	47.86	46.1218	44.3067
TGME49_276200	III	50749	64176	12555	0.356389	0.43505	0.533979	1.15828	1.10174	0.981384	0.953867	1.1234
TGME49_276190	III	64911	70452	2899	25.93	21.5888	30.4487	31.6584	18.0121	18.1599	21.0682	16.1073
TGME49_276180	III	73594	92417	10265	23.2986	29.8643	17.4161	23.1076	16.3893	15.877	21.5677	18.7651
TGME49_276170	III	93156	107901	8518	124.443	162.233	103.563	119.696	89.1114	81.2012	186.081	156.149
TGME49_276155	III	110574	118813	2607	1.20143	1.39676	7.71474	4.33856	6.83129	7.519	6.03307	6.16369
TGME49_276140	III	119650	123884	2379	572.71	583.839	603.999	680.689	516.17	547.228	491.718	474.037
TGME49_276130	III	125875	135978	3900	76.9838	97.1031	50.4241	58.9147	73.6839	67.9968	61.5577	62.8878
TGME49_276120	III	135098	141324	5113	49.3566	55.6834	23.8199	25.8503	46.2274	42.5	36.2421	39.8998
TGME49_276110	III	141556	144227	1489	92.4043	91.0953	112.561	110.252	86.7426	97.0416	64.7181	72.5983
TGME49_276100	III	144983	150285	2971	31.4764	36.5393	24.0695	25.235	33.8127	32.8947	24.6154	25.7711
TGME49_275990	III	154527	162603	4933	37.8693	48.6727	29.8987	35.8339	42.6916	34.9114	33.6802	36.5053
TGME49_275980	III	163304	168054	2384	45.2327	36.2762	43.3536	44.3261	43.8789	40.2894	41.192	37.5468
TGME49_275970	III	169229	173326	2034	7.91942	6.93721	37.9043	37.4955	23.2069	23.6799	27.9867	27.3902
TGME49_275870	III	173659	180622	3469	21.9918	23.1587	31.8875	27.7607	26.8154	31.8857	48.0781	41.4275
TGME49_275860	III	180805	184524	2693	588.095	533.173	284.421	339.361	414.123	413.025	583.478	541.562
TGME49_275850	III	185444	189437	2687	4.66264	6.09831	21.2076	25.1361	19.0472	17.6125	19.6997	17.1157
TGME49_275840	III	189081	199698	3701	17.1677	19.8007	22.0391	17.5507	17.753	14.603	18.3795	18.0066
TGME49_275830	III	200116	208573	5153	6.29534	7.77315	8.23974	8.71712	8.01944	8.91224	8.66094	8.13307
TGME49_275820	III	211428	211499	72	0	6.32182	0	8.97668	7.20435	0	4.43548	5.59692
TGME49_275810	III	214339	216946	827	2888.66	2645.99	3127.1	2965.5	3079.67	2729.18	1910.24	2163.45
TGME49_275802	III	218800	227438	3262	83.3991	103.606	95.225	110.956	75.7981	76.2311	101.989	96.8839
TGME49_275798	III	229147	230559	1413	0.633329	0.644261	3.16306	0.914821	0.489468	1.98181	2.99466	3.24407
TGME49_275795	III	230788	232285	974	0	0	0	0	0.71008	2.30003	3.52471	2.84443
TGME49_275790	III	231853	234966	3114	0	0.292338	1.07645	0.415107	0.555249	1.43881	4.20474	3.75284
TGME49_275780	III	236194	240262	4069	14.2954	20.0235	17.8491	16.9959	14.1927	14.1081	13.676	16.44
TGME49_275770	III	240457	243713	3257	43.5495	50.5901	31.3901	31.2544	41.5141	38.0881	36.0831	34.2259
TGME49_275760	III	244620	247666	2588	4.32232	3.69343	10.3618	12.6118	10.6228	7.24959	14.4068	9.1869
TGME49_275755	III	247527	249512	579	76.1201	104.163	140.875	146.232	116.464	108.82	125.481	130.933
TGME49_275750	III	249874	251929	276	487.166	473.312	544.507	627.587	429.129	420.044	364.77	380.529
TGME49_275740	III	252769	262766	5989	9.41365	11.0962	9.7015	11.9249	10.4799	10.988	12.9843	12.7928
TGME49_275710	III	263068	265434	2093	0.213783	0.652419	0	1.85281	1.487	2.67586	1.14437	0.986747
TGME49_275700	III	265537	267109	1169	0	0	0	0	0.591632	0.479092	2.32208	0.68944
TGME49_275690	III	267833	280794	4509	196.186	208.506	198.987	215.44	171.792	184.14	166.193	169.002
TGME49_275670	III	282933	295203	9710	90.5262	79.5025	67.0871	68.2931	75.5901	87.008	84.5254	77.566
TGME49_275680	III	283043	289183	6141	57.3426	51.291	43.304	47.1506	45.3026	49.0199	75.7304	61.7164
TGME49_275660	III	296056	298959	2904	0.770398	1.25391	56.5602	61.3159	22.1489	21.6965	12.5916	13.894
TGME49_275650	III	300533	304214	3682	152.147	151.559	206.659	213.714	126.039	154.389	80.5976	86.2156
TGME49_275640	III	304309	309027	2942	109.809	115.108	96.8473	90.4015	142.637	138.492	185.268	167.828
TGME49_275630	III	309405	324990	6634	45.3247	41.6131	34.3593	40.529	34.534	39.9318	38.066	35.0571
TGME49_275610	III	327005	336832	6642	82.1869	82.3035	77.7201	71.9108	55.0316	64.5053	65.8471	60.929
TGME49_275600	III	339346	344097	3048	0	0.149334	0	1.16626	1.02109	1.46997	0.890589	0.892422
TGME49_275590	III	346287	348882	921	0.728741	0.494214	24.2639	36.4915	22.1528	28.2766	38.489	32.8705
TGME49_252090	III	351798	352569	251	5.34797	9.06715	111.29	47.6372	37.8874	69.1705	45.4858	43.3482
TGME49_252080	III	352616	353953	1338	4.68181	3.40187	24.6352	28.5	23.0022	19.4639	25.1211	21.6473
TGME49_252070	III	360838	364761	2311	19.168	17.9232	18.8562	21.1152	22.4454	27.2638	36.6201	28.4011
TGME49_252065	III	367579	371014	2232	27.0633	29.4678	11.0133	13.7546	18.4369	22.4575	36.8074	28.3231
TGME49_252190	III	375017	378617	2126	73.9782	62.0882	18.3948	29.6408	42.1282	37.8026	74.9192	59.3994
TGME49_252200	III	387386	393780	3822	55.6675	43.4687	40.1978	39.317	43.5654	51.4339	47.7528	45.5222
TGME49_252210	III	394295	405773	9740	83.4714	84.5618	90.9713	97.8108	76.2626	91.6276	138.759	132.737
TGME49_252220	III	408625	415712	2731	104.038	87.1674	117.013	115.846	98.893	100.897	84.0484	96.0042
TGME49_252230	III	417274	421073	3405	34.0349	34.1545	38.3936	43.5626	38.1863	33.8009	32.5686	33.4188
TGME49_252250	III	421462	428359	4723	13.4054	11.6612	14.4312	14.0951	9.55496	10.7909	15.0617	12.7344
TGME49_252255	III	442321	445454	1348	2.98741	2.36365	1.65779	0.958934	3.07842	3.11605	6.04121	5.11943
TGME49_252260	III	447506	450330	2825	8.0778	9.02285	17.9963	7.32116	22.4011	22.0058	21.7896	21.2722
TGME49_252270	III	450846	458765	3116	34.176	25.7823	37.6515	40.7581	29.5203	34.6891	29.1837	32.4283
TGME49_252280	III	458326	465813	7488	14.4608	19.6341	16.3395	19.3344	13.7622	14.9588	10.353	11.9136
TGME49_252290	III	468623	477955	1703	117.051	144.997	108.258	117.651	69.4461	76.9546	93.1999	85.4228
TGME49_252295	III	478743	483106	1802	171.828	211.293	204.621	209.104	135.675	159.129	155.38	146.309
TGME49_252300	III	483120	484468	1257	0	0	0	2.82798	1.37553	2.22776	1.96897	3.28602
TGME49_252310	III	486624	489327	2633	54.3802	58.7763	47.1045	63.5766	48.7915	48.4973	42.9061	49.6261
TGME49_252320	III	489470	492923	1859	41.8805	44.3173	46.2809	62.2332	56.2707	38.4117	56.6043	55.6018
TGME49_252330	III	493526	495210	1190	0.376006	0.382496	4.69476	2.17251	2.32477	0.470637	3.0862	2.49745
TGME49_252340	III	497040	505615	5790	39.142	43.3159	50.7536	47.2183	37.8359	34.8706	35.4103	36.1567
TGME49_252350	III	505293	509659	4367	1.33199	0.990181	5.11725	5.62405	4.55324	3.52681	5.79548	4.97148
TGME49_252360	III	512376	515415	3040	297.758	274.899	232.292	237.055	338.813	333.824	234.658	278.903
TGME49_252370	III	516505	523609	5880	0.228289	0.38705	1.14016	0.329756	0.764544	0.523864	0.936883	0.70247
TGME49_252380	III	527002	537800	5609	29.4761	40.6562	39.5426	47.6473	48.6747	50.5241	70.672	59.2092
TGME49_252385	III	537834	539431	1214	12.9	11.623	11.9651	17.5689	21.9335	30.6786	44.3914	33.6092
TGME49_252390	III	540060	543200	2591	260.766	240.234	157.188	163.514	239.57	267.384	293.625	269.086
TGME49_252395	III	543875	549446	5572	0.88333	0.490134	1.60424	1.73992	1.05505	1.30667	3.22392	3.07368
TGME49_252400	III	550720	556774	4134	9.09181	18.0571	5.67595	10.0059	11.6273	11.9896	12.8236	12.5626
TGME49_252410	III	556865	557818	954	15.2432	9.06525	3.51369	4.40366	11.9619	7.63182	10.5447	12.0914
TGME49_252420	III	557870	565164	2409	22.4745	32.2153	17.6253	19.3172	22.6807	16.9715	21.0451	20.5127
TGME49_252430	III	565834	573262	6896	57.7477	73.6946	37.5907	40.7231	41.12	40.9323	61.9514	54.828
TGME49_252440	III	574495	576309	1815	40.0607	51.4105	50.4809	52.1686	37.5341	41.6572	41.217	46.348
TGME49_252450	III	575020	577921	2902	20.9693	28.3894	30.9948	29.7326	25.5603	29.624	29.8501	30.9315
TGME49_252465	III	578512	589022	2734	10.0651	8.49075	7.76506	17.4937	9.04365	6.76003	10.8632	8.67788
TGME49_252480	III	589287	591772	1938	12.1212	14.3268	13.5489	13.6735	12.4905	12.7155	15.5723	15.3612
TGME49_252490	III	592387	594764	2378	36.3151	35.6021	37.1198	34.1099	33.4466	39.5668	26.6577	29.9734
TGME49_252500	III	596028	599103	3076	171.138	133.473	128.227	129.432	164.417	164.139	174.186	173.47
TGME49_252510	III	600681	607825	2181	61.0342	64.1747	35.6057	38.3763	81.8938	80.6319	98.7276	94.2776
TGME49_252620	III	613479	617382	2133	14.1597	9.38936	17.2867	16.3626	11.5108	15.0977	18.266	17.9243
TGME49_252630	III	619156	622441	2180	198.17	171.002	242.947	250.672	269.985	253.311	199.743	217.063
TGME49_252640	III	622839	627739	4504	0.0993444	0.505296	0.49616	1.0045	0.614226	1.36782	3.65159	3.2657
TGME49_252850	III	631372	635501	2359	15.4586	12.5418	21.7881	16.1649	13.7796	16.8564	25.6878	21.097
TGME49_252860	III	637657	638927	1271	1.40817	0.8953	4.39556	2.03406	4.6253	2.42354	4.0202	3.76504
TGME49_252870	III	640568	647908	7341	4.63234	6.01438	5.02283	5.89886	5.0404	3.43313	6.53631	6.13442
TGME49_252880	III	647981	659507	11527	37.9633	52.3997	27.0444	23.8859	33.7799	25.1922	22.5795	25.0397
TGME49_252890	III	661297	664586	2883	0.388005	0.947286	2.32539	2.46602	3.71838	6.21639	7.86479	5.87065
TGME49_252990	III	664821	668334	1820	59.2499	63.3988	35.6079	37.8204	54.5314	52.467	48.9122	46.2484
TGME49_253000	III	668408	676156	6209	36.0682	47.8703	30.9526	28.1055	32.6093	38.4256	41.0445	40.929
TGME49_253010	III	676527	676599	73	0	12.4704	15.3062	17.7074	0	7.67203	12.0305	11.7305
TGME49_253020	III	679305	687248	3611	52.0431	57.4163	49.0447	62.6454	53.1498	51.1823	59.0775	60.8624
TGME49_253030	III	686944	702228	6748	11.7034	18.7181	13.081	12.0682	29.1078	19.7116	24.5503	24.4247
TGME49_253035	III	704974	705216	243	63.5264	71.179	50.5797	61.1744	40.5578	46.0953	42.7121	56.591
TGME49_253040	III	705372	708941	2184	15.0583	18.3402	9.72055	18.4959	12.0336	11.4114	13.0506	15.7067
TGME49_253050	III	708944	710262	1319	13.5693	14.4937	12.7068	14.2102	9.17613	10.1906	18.3405	16.5743
TGME49_253060	III	710550	712902	2353	16.5439	21.6656	9.97212	14.97	11.1694	20.9457	18.7976	15.3921
TGME49_253070	III	715817	721171	1953	31.7314	39.5041	40.6206	41.0363	33.6425	23.8018	28.4116	31.1828
TGME49_253080	III	726059	730573	2069	50.1729	59.8388	44.8237	59.6652	51.1443	57.9277	53.02	46.1117
TGME49_253090	III	726203	739498	7595	30.1636	32.1226	26.5546	32.8479	29.8229	28.0582	28.6347	26.1511
TGME49_253100	III	739666	743207	3542	70.9953	71.5782	64.3534	57.3879	85.2319	102.303	71.386	71.5764
TGME49_253110	III	745115	748065	1855	0	0	0	0	0.37284	0.603836	0.301278	0.0543097
TGME49_253120	III	752015	760147	2561	4.01846	3.73236	7.41702	15.1422	29.5038	25.4771	38.0333	30.9
TGME49_253130	III	761988	767032	3280	87.4431	69.1082	57.2302	54.1885	75.224	78.5447	85.4372	78.0309
TGME49_253140	III	771273	778593	6559	18.8966	19.2228	16.354	12.9087	24.6743	26.8971	20.6809	20.6896
TGME49_253150	III	781695	791946	4226	0.317639	0.107707	0.793198	0.458818	1.96389	2.51801	1.73809	2.03825
TGME49_253160	III	793485	799365	2483	28.9228	33.7299	30.6001	26.2902	26.0436	22.7813	25.5304	23.2893
TGME49_253170	III	799568	820723	11598	23.9001	23.881	19.9424	18.3063	19.3806	17.36	25.4013	23.1014
TGME49_253290	III	826640	839072	3353	108.225	117.763	107.303	115.27	79.568	91.1995	82.2436	78.5705
TGME49_253300	III	840330	845158	4157	11.8401	11.1685	9.94516	6.53007	13.1852	14.4831	15.8448	14.6258
TGME49_253310	III	843423	852465	6339	14.7173	14.72	19.9181	16.0586	15.002	16.4333	15.9451	15.9723
TGME49_253320	III	852500	857790	2525	24.9861	21.3615	29.6485	21.2454	26.4321	21.5151	30.5442	27.3307
TGME49_253330	III	857862	860333	2038	8.56253	7.81697	20.2856	16.1739	27.9973	25.2823	77.449	82.652
TGME49_253340	III	862121	864021	1092	1.22925	0	4.09286	8.28617	10.1336	12.0525	8.62726	14.0692
TGME49_253350	III	864856	870202	2436	6.06147	6.63324	10.091	10.2148	7.3818	6.20754	4.32624	5.31431
TGME49_253360	III	871334	877258	3029	50.6683	57.704	59.0216	68.8143	55.9985	62.6807	49.5005	50.2226
TGME49_253370	III	880036	903581	7294	58.4	60.3753	41.5139	41.7796	41.6497	48.1048	51.6752	45.027
TGME49_253380	III	904922	917479	11452	57.6696	60.0959	44.1009	46.2222	40.3726	45.6527	45.7755	41.1441
TGME49_253390	III	918696	919349	654	0	0	0	0	1.05752	0	8.78958	3.23491
TGME49_253400	III	921132	930042	5774	49.4795	58.8868	30.5753	31.9019	35.9644	39.5261	46.4458	41.7181
TGME49_253410	III	930206	934650	3106	38.8239	36.1235	29.4987	30.797	40.9159	37.3252	32.7735	36.3439
TGME49_253420	III	935456	940904	2263	52.6932	56.1169	61.7185	62.4044	49.5868	50.8581	46.111	44.3178
TGME49_253430	III	942628	953297	5777	444.194	407.581	404.719	399.965	311.928	338.294	433.288	392.41
TGME49_253440	III	961743	973589	5955	166.468	174.31	131.812	152.708	99.7068	103.547	157.224	143.174
TGME49_253460	III	974006	975053	630	1.42047	0	26.6036	33.342	21.6817	31.5588	48.7903	41.657
TGME49_253470	III	975274	978405	2121	154.95	156.659	148.559	147.487	170.785	153.811	169.954	153.492
TGME49_253480	III	978668	981066	1997	13.4436	10.9405	51.4754	48.8706	46.8409	40.8054	48.7348	39.7277
TGME49_253490	III	981932	992498	9644	24.3581	25.4393	18.19	20.7756	17.5164	19.7449	29.4469	25.3428
TGME49_253500	III	993668	998153	1173	0	0	0	0	0.884422	0.238729	0.612573	0.55826
TGME49_253510	III	1000514	1008158	3677	33.5859	26.9859	31.6031	31.8151	32.2109	33.8898	39.2137	35.5907
TGME49_253520	III	1008291	1013853	5563	11.7432	14.4005	15.0641	17.0788	11.5622	12.7355	11.3092	10.884
TGME49_253530	III	1014017	1016223	989	50.4452	57.0689	42.9316	51.6273	74.1269	66.8219	45.5299	53.4791
TGME49_253540	III	1017517	1021017	3387	19.9482	21.2332	14.6803	19.6549	11.9456	15.5434	11.4089	11.1839
TGME49_253550	III	1022644	1026046	1497	0.298896	0	1.49279	2.15872	0.924005	1.30942	1.91997	1.41325
TGME49_253560	III	1026569	1035717	8838	14.7326	14.6264	9.98764	12.7977	13.2642	14.7334	23.939	21.168
TGME49_253570	III	1035856	1040911	1848	43.7036	44.0885	45.3471	34.2746	52.9567	47.7322	60.4407	59.2037
TGME49_253580	III	1043401	1048472	4189	2.34992	2.39049	3.73429	3.78011	6.56286	6.48432	9.22462	7.31113
TGME49_253600	III	1050235	1059746	4119	36.2281	44.2021	27.9406	32.4808	54.4026	54.1158	50.1633	46.2999
TGME49_253615	III	1060224	1074295	7920	15.8188	22.4137	16.0126	17.8718	12.0509	12.6579	13.7399	13.776
TGME49_253640	III	1077556	1081977	2710	127.547	103.547	100.603	92.1783	138.132	158.511	199.656	170.782
TGME49_253650	III	1082223	1088858	5056	97.2153	98.7584	103.094	121.377	92.6079	101.632	99.5931	101.781
TGME49_253660	III	1092304	1092807	504	0	0.903117	0	0	0	0	1.90092	0.599669
TGME49_253670	III	1094708	1097969	1979	0	0	3.95223	0.32659	1.04844	3.82051	1.6944	1.62902
TGME49_253680	III	1099812	1100527	480	79.7015	102.413	93.1127	100.314	144.447	112.012	175.978	160.876
TGME49_253690	III	1101466	1103515	1666	622.558	433.587	389.665	356.718	365.528	380.544	430.918	401.587
TGME49_253700	III	1103849	1113289	6745	95.5261	102.169	83.9878	86.7192	72.8788	83.1576	99.3811	87.7276
TGME49_253710	III	1115275	1123818	5504	3.73956	2.15015	4.46616	4.93196	6.25145	9.36144	8.50027	8.95059
TGME49_253730	III	1124622	1136313	5022	46.7761	43.9128	59.1827	61.3889	38.3199	40.5936	31.2074	31.2043
TGME49_253740	III	1139037	1144879	3906	32.476	32.8035	27.7479	28.1297	34.8376	32.9066	31.9273	30.409
TGME49_253750	III	1145954	1174055	24267	13.7736	15.6619	12.8003	16.1667	9.90387	9.60087	13.2226	11.6034
TGME49_253755	III	1178184	1180594	882	3.55117	4.6446	11.4016	7.32791	10.586	12.6997	8.87097	9.82316
TGME49_253760	III	1182694	1184311	809	9.95556	16.3164	6.90576	11.9837	11.5412	15.2303	14.2111	15.6285
TGME49_253770	III	1184639	1185222	441	19.2778	5.67673	5.06736	21.2509	24.3086	20.3196	18.8282	20.6743
TGME49_253780	III	1188400	1193579	2392	78.378	67.6477	90.8549	93.8949	71.4171	65.3245	55.9739	64.5026
TGME49_253790	III	1195473	1203818	7481	1.85414	1.70362	8.21472	6.43643	6.61017	3.14429	6.21122	6.76029
TGME49_253800	III	1204931	1211694	3386	19.8219	21.2395	19.7995	24.3373	20.8343	21.5852	19.7593	21.1694
TGME49_253810	III	1211431	1220222	5797	21.1875	24.7725	19.6602	20.0686	19.0293	16.6655	21.8844	20.1854
TGME49_253820	III	1222428	1224872	1293	553.512	625.728	547.874	556.846	640.937	544.248	616.481	597.532
TGME49_253830	III	1225461	1227608	1721	34.969	33.06	62.3276	52.2014	47.722	48.1631	58.9164	60.7921
TGME49_253840	III	1228714	1228786	73	0	0	0	0	4.73711	0	0	0
TGME49_253850	III	1229206	1232156	2951	14.8593	14.9616	12.8736	14.4552	12.6558	12.7157	10.876	11.6414
TGME49_253860	III	1233042	1243772	10028	22.1314	27.3248	16.1564	18.1109	13.8799	14.856	20.1587	18.3195
TGME49_253870	III	1246091	1262519	14556	2.62824	2.75179	3.68459	3.641	1.94809	1.48133	2.62728	2.16632
TGME49_253880	III	1264971	1272679	6657	31.8261	36.7172	32.4782	32.9617	25.298	28.1838	32.2257	30.7818
TGME49_253890	III	1273562	1282929	4815	43.4437	44.2409	52.2127	62.216	39.2491	47.573	69.0112	57.0781
TGME49_253900	III	1284336	1292774	2475	140.652	188.965	86.9052	136.315	81.4572	81.5762	126.226	110.636
TGME49_253910	III	1295905	1299002	3098	29.2473	28.6502	18.2138	18.4633	28.2407	33.4444	33.9405	29.1372
TGME49_253920	III	1305326	1309689	2607	1.37306	1.04757	1.28579	1.85938	1.92337	0.966729	2.90935	3.05286
TGME49_253925	III	1310414	1313504	960	1.86436	0	1.16391	0.673251	0.720435	0.583394	2.24546	1.36425
TGME49_253930	III	1314904	1350963	11307	4.70914	5.65592	6.86795	4.45857	5.65797	5.25039	9.3064	8.21049
TGME49_253940	III	1351703	1364548	6674	40.4271	34.3049	29.1308	26.4378	22.1765	24.1679	44.8958	34.3564
TGME49_253950	III	1364724	1369339	2048	45.8808	58.4521	50.7391	42.762	41.5376	37.7383	64.4011	63.0637
TGME49_253960	III	1369380	1374451	1824	22.5686	19.9636	17.7649	13.8194	12.3232	22.7217	25.1247	21.9274
TGME49_253970	III	1373238	1377652	4415	9.27325	13.4025	6.83318	7.75878	7.04933	7.61121	6.4739	7.90667
TGME49_253990	III	1379580	1391251	8869	17.5316	19.2969	18.0787	19.9311	15.9082	16.4816	17.2748	16.0335
TGME49_254000	III	1391276	1397938	6203	60.9893	71.2511	48.0949	48.7111	39.3028	48.2591	71.833	59.313
TGME49_254010	III	1397335	1406546	4431	57.1048	73.8587	44.7596	53.7507	45.7333	46.3871	65.8746	57.5114
TGME49_254020	III	1406561	1416138	1791	0	0	1.87161	1.44349	1.25503	1.56353	1.69395	1.74376
TGME49_254030	III	1419447	1421146	803	510.413	378.931	552.414	534.443	570.176	603.998	509.854	526.431
TGME49_254040	III	1421675	1422148	474	14.6317	26.4076	97.8272	51.133	85.7227	107.522	74.1119	84.2725
TGME49_254050	III	1422843	1427803	3189	47.2141	50.3129	48.7024	57.7615	57.0384	58.1308	61.8631	61.4924
TGME49_254060	III	1428009	1429760	1243	8.27939	4.76043	11.6859	9.61942	13.6321	17.5722	6.4873	10.2528
TGME49_254070	III	1431477	1437619	6143	80.7779	66.0194	73.4837	71.4394	100.652	116.06	126.211	120.408
TGME49_254080	III	1438358	1441266	2909	148.124	123.611	77.2044	90.6494	101.46	128.415	165.661	140.796
TGME49_254090	III	1441911	1448061	6151	40.5183	41.5877	35.2408	41.3473	27.6883	30.7754	45.7668	37.0974
TGME49_254110	III	1449204	1456400	3676	27.9959	26.5599	28.8761	25.3184	27.7042	27.424	22.0664	20.349
TGME49_254120	III	1457766	1460642	1458	453.585	474.995	537.601	542.812	638.134	605.001	721.724	746.083
TGME49_254135	III	1461129	1469559	4765	8.82687	8.6449	9.84864	10.9868	6.56783	8.93272	13.9906	10.9413
TGME49_254140	III	1470340	1472244	210	134.234	101.872	130.358	61.5544	55.1648	29.3364	67.2926	61.8859
TGME49_254150	III	1473171	1478870	4920	14.0055	15.4499	7.94864	8.67016	10.051	8.76514	16.6168	15.3267
TGME49_254160	III	1480468	1505292	13551	0.066039	0.302305	0.907008	0.143086	0.586939	0.413297	1.07229	0.944177
TGME49_254180	III	1505210	1510737	1390	0	0	0.80385	0.929959	0.497567	0.20146	0.344628	0.289912
TGME49_254190	III	1513102	1517474	3612	0	0	0.618689	0.357874	0	0.31011	0.309452	0.209187
TGME49_254200	III	1518756	1529287	3905	10.1979	12.0641	15.4512	16.5511	9.96249	13.9118	12.4307	10.3969
TGME49_254210	III	1529733	1538229	5032	8.09175	10.4024	7.32763	6.80744	6.2537	8.68135	8.99613	7.89819
TGME49_254220	III	1538462	1546812	3607	17.8631	16.531	18.5864	15.1412	8.34083	6.59897	15.4055	15.6968
TGME49_254230	III	1547022	1556303	3980	16.7512	20.1853	15.7215	19.8931	12.8592	14.494	23.5103	16.3393
TGME49_254250	III	1559480	1562915	1443	17.5196	26.3387	18.5838	14.1089	9.46601	4.26933	15.9899	10.9611
TGME49_254255	III	1562930	1564435	897	7.98122	15.9843	8.71958	16.2121	5.20448	5.61931	14.152	9.20964
TGME49_254260	III	1564158	1567101	2944	20.6701	26.129	26.1879	23.3808	21.2607	23.9699	23.4852	23.3896
TGME49_254270	III	1569123	1571615	1942	22.2341	23.4382	18.4116	12.9797	19.3204	25.6669	18.788	16.4968
TGME49_254280	III	1571871	1574672	2415	17.5088	33.9258	23.5963	14.4519	20.7629	21.4515	26.7782	25.0505
TGME49_254290	III	1577311	1583779	6469	10.306	13.3687	12.6089	12.0892	13.2572	13.679	12.4652	13.4554
TGME49_254300	III	1585598	1597456	6493	44.5517	40.4137	46.1189	53.0555	30.0379	31.2246	30.064	30.4499
TGME49_254310	III	1607552	1608478	927	0	0	2.41068	0	0	0	0	0.217356
TGME49_254320	III	1609776	1611475	1700	0.263204	0.803242	2.62906	1.90094	3.96663	2.96501	2.77087	3.17049
TGME49_254330	III	1612933	1618992	3666	0.976426	0.37248	0.304788	1.23411	1.41493	0.305542	3.00539	2.15724
TGME49_254335	III	1619343	1620734	440	26.9485	24.3103	0	11.0168	26.7216	22.275	16.5121	24.4992
TGME49_254340	III	1620778	1622957	835	35.0991	30.5264	24.0866	17.8029	27.3334	28.506	22.0871	22.019
TGME49_254350	III	1624144	1628788	1287	0	0.353668	0.868183	0.502192	2.2839	2.82858	2.60546	1.91782
TGME49_254360	III	1634905	1637086	618	0	0	0	0	1.67868	0	0.129189	0.163017
TGME49_254365	III	1647870	1651581	1765	227.399	192.384	279.496	276.838	249.316	248.932	189.351	193.869
TGME49_254370	III	1654004	1693088	14024	34.8092	39.3373	29.838	30.8321	28.9859	25.4191	32.6608	27.3736
TGME49_254380	III	1695654	1700061	2407	30.5796	28.7436	41.7788	47.5276	30.2421	31.877	43.3856	41.1223
TGME49_254390	III	1699734	1709702	6426	37.1828	44.0933	37.2103	36.3593	35.3827	32.7703	50.6788	44.3912
TGME49_254400	III	1709902	1712795	2784	25.2332	30.9006	23.6795	27.1622	18.7562	15.0878	22.5693	20.9703
TGME49_254410	III	1713344	1721953	4142	42.7246	50.6051	43.1618	40.6486	30.4315	34.5473	60.4091	50.3114
TGME49_254420	III	1722224	1734236	5976	21.676	19.3463	16.4536	17.2504	13.5986	15.6509	30.2067	23.18
TGME49_254430	III	1735172	1738663	2767	0.323417	0.986998	7.67246	9.1097	6.68622	7.69144	9.95459	8.44695
TGME49_254440	III	1739975	1743314	843	2451.14	2485.62	2982.92	2690.71	2492.86	2316.63	2038.49	2223.31
TGME49_254450	III	1748505	1755052	1197	28.0355	21.1044	30.8042	42.9261	31.3453	23.8621	43.4878	36.8218
TGME49_254460	III	1754546	1758220	3171	75.2095	77.6561	61.3116	77.1468	92.8046	96.0806	95.4237	91.9281
TGME49_254470	III	1758384	1764666	3897	391.416	380.652	291.739	309.975	360.584	394.498	441.479	410.229
TGME49_254480	III	1764736	1769246	3609	26.3459	32.7915	37.4618	37.8767	30.6619	29.7953	22.4318	24.5371
TGME49_254485	III	1769591	1771842	1002	0.446554	1.36279	0	2.58012	1.03536	0.55894	2.54974	2.81521
TGME49_254490	III	1772072	1789272	7111	14.6611	23.8435	13.4346	17.7236	10.4069	13.3891	12.2829	11.4331
TGME49_254500	III	1790815	1795243	3076	12.0735	11.616	11.9872	9.87552	10.0617	13.0183	11.8876	10.4314
TGME49_254510	III	1796053	1801416	2716	22.9819	31.1715	27.5635	30.6979	27.1834	22.2704	13.6396	18.4723
TGME49_254520	III	1801857	1806056	1972	115.719	114.254	166.583	140.604	108.197	90.1716	62.875	78.9812
TGME49_254530	III	1807256	1817100	7033	3.72183	4.85395	3.97182	6.80048	4.00731	3.10568	5.75547	4.86318
TGME49_254540	III	1817795	1821466	3672	16.4503	15.9905	12.1716	11.6169	11.2068	13.8032	14.8502	14.9114
TGME49_254555	III	1821490	1831059	6147	29.2256	35.0245	31.6283	26.3912	19.6617	24.1899	32.0939	27.4028
TGME49_254570	III	1830669	1845631	8072	43.4587	56.7554	46.3718	43.3577	33.4371	29.2102	31.8386	33.3298
TGME49_254580	III	1846513	1850142	2924	88.7549	86.2396	92.0936	86.6477	78.1145	86.7669	77.0263	71.286
TGME49_254590	III	1851529	1852406	571	23.5086	23.5158	66.5323	28.8637	93.2655	77.9766	83.7537	84.5124
TGME49_254600	III	1853817	1854050	234	122.379	68.0811	176.675	124.293	113.053	84.9661	131.017	102.467
TGME49_254603	III	1854896	1855816	921	45.6678	46.9503	81.284	72.2813	79.7876	97.9038	72.7304	69.9523
TGME49_254606	III	1856652	1857212	561	224.122	276.267	306.724	258.644	218.519	203.658	176.755	180.658
TGME49_254610	III	1857219	1859019	668	165.783	102.55	209.085	229.792	178.858	168.101	143.781	144.481
TGME49_254620	III	1860695	1861756	207	8973.8	7806.07	7176.42	7671.55	10608.2	9506.11	7879.35	6967.43
TGME49_254625	III	1864720	1867433	1762	18.0299	24.2827	36.1459	31.1789	17.7615	13.6677	21.7495	19.4113
TGME49_254630	III	1867171	1872582	4039	69.6816	59.5024	92.6746	91.7715	59.1617	63.8541	67.4251	65.0511
TGME49_254635	III	1872699	1873793	797	6.73697	10.851	15.4214	8.5149	29.9383	28.4597	26.5461	27.5562
TGME49_254640	III	1873817	1875866	1932	52.1095	33.219	26.8928	33.6207	74.5494	63.4849	73.8053	65.8333
TGME49_254650	III	1874178	1877519	2895	77.9748	67.5288	72.7533	65.6368	102.25	103.5	102.039	102.902
TGME49_254660	III	1877393	1879834	1281	121.38	89.5418	183.172	159.184	180.868	178.816	165.723	188.237
TGME49_254670	III	1879969	1881157	853	0.524557	0	1.30991	1.51541	0.810807	0.656575	4.21189	2.18496
TGME49_254680	III	1881916	1883243	1269	0	0	0.880498	1.01863	0.54501	0	1.38412	1.34961
TGME49_254690	III	1883445	1887665	2975	146.116	130.049	209.386	230.069	186.33	195.785	191.693	177.7
TGME49_254700	III	1889387	1891593	2107	8.28212	11.0174	6.36366	4.60124	11.2425	5.98069	8.6394	11.6667
TGME49_254710	III	1892229	1904365	7039	57.0195	58.5857	41.7479	47.5169	37.0913	41.8512	74.3717	58.795
TGME49_254720	III	1904183	1905992	1810	1751.59	1462.83	1373.23	1329.07	1494.53	1537.07	1938.54	1728.71
TGME49_254730	III	1905288	1914229	6922	167.227	211.278	137.772	122.738	132.513	130.346	142.918	141.991
TGME49_254740	III	1914621	1916116	1169	2.29656	0	0	0	0.591632	1.43728	1.36593	2.1545
TGME49_254750	III	1918201	1920893	1761	0.889304	0.258473	7.61398	4.03721	3.3383	1.27214	4.44304	3.74717
TGME49_254760	III	1921021	1924046	2292	2.53788	3.37605	8.28751	8.17771	6.33681	6.23101	12.6098	10.3953
TGME49_254770	III	1923744	1926118	2375	77.6203	63.8197	105.384	102.731	94.6425	88.4302	82.7633	87.6583
TGME49_254780	III	1926139	1927128	405	0	0	11.0356	4.78757	0.426925	6.22287	4.33692	6.46755
TGME49_254790	III	1927911	1934244	5124	0.261971	0.444156	3.70706	3.91022	2.8345	2.84183	4.51858	3.13598
TGME49_254800	III	1935945	1938289	1743	42.614	36.0376	43.2709	60.2566	65.9676	67.9589	72.006	71.8447
TGME49_254810	III	1938417	1945458	6127	7.96013	8.24612	9.66536	9.70484	7.33722	7.35836	10.8154	8.64064
TGME49_254820	III	1945588	1948978	3391	85.0426	111.947	126.2	132.085	91.5767	87.4523	82.7582	93.3023
TGME49_254830	III	1950809	1956677	3666	5.91958	11.671	9.75321	11.6359	6.69734	8.4024	7.88369	8.62896
TGME49_254835	III	1957314	1963929	3230	15.5152	13.1055	12.4535	13.9069	11.5091	9.79668	12.3837	11.0102
[truncated: 6,774 more rows]

## Sheet: iDEP_Diff_expression
Geneid	X24h-UT___log2FoldChange	X24h-UT___padj	X48h-UT___log2FoldChange	X48h-UT___padj	X7h-UT___log2FoldChange	X7h-UT___padj	X48h-X24h___log2FoldChange	X48h-X24h___padj	X7h-X24h___log2FoldChange	X7h-X24h___padj	X7h-X48h___log2FoldChange	X7h-X48h___padj	data	UT1	UT2	X7h1	X7h2	X24h1	X24h2	X48h1	X48h2
TGME49_200010	0.349166	0.00114657	-0.0140933	0.922155	-0.548388	4.64021e-07	-0.363259	0.000703941	-0.897554	1.32574e-17	-0.534295	3.48366e-07		11.602	11.5339	11.0554	10.9904	11.9962	11.8316	11.4997	11.6068
TGME49_200110	5.31609	0.0146277	5.09836	0.0149829	2.37053	0.467624	-0.217728	0.92106	-2.94556	0.222686	-2.72783	0.21215		2	2	2.83449	2	3.31734	4.03997	3.2263	3.83355
TGME49_200130	1.33375	0.1359	1.73961	0.0288388	-0.734278	0.616803	0.405866	0.693394	-2.06803	0.0773485	-2.47389	0.0156802		3.75774	3.55856	2	3.64498	4.74836	4.6293	4.91281	5.15973
TGME49_200230	-0.0337583	0.981827	0.191505	0.841381	-0.576744	0.631583	0.225263	0.844255	-0.542986	0.668054	-0.768248	0.436533		4.09586	4.55188	3.74403	3.99219	4.51724	4.03997	4.37475	4.60104
TGME49_200240	0.365983	0.339995	0.404385	0.238073	0.0782625	0.890199	0.0384019	0.939523	-0.28772	0.547942	-0.326122	0.404969		6.82728	6.23532	6.36322	6.81921	6.79997	7.03629	6.94521	6.96441
TGME49_200250	0.205004	0.221319	0.117232	0.489792	0.0070739	0.983258	-0.0877719	0.681409	-0.19793	0.294622	-0.110158	0.546719		10.7189	10.2868	10.5791	10.4786	10.8189	10.6202	10.6046	10.6682
TGME49_200260	-0.334947	0.743459	0.128225	0.894134	-0.458493	0.69839	0.463172	0.660238	-0.123546	0.936543	-0.586718	0.549134		4.9722	3.84564	3.74403	4.39365	4.24188	4.26424	4.63022	4.62978
TGME49_200270	0.0942917	0.685272	0.0808727	0.706992	-0.159912	0.517969	-0.013419	0.965823	-0.254204	0.276175	-0.240785	0.24156		9.18082	8.76363	8.70579	8.92377	9.05849	9.10794	9.12139	9.01627
TGME49_200280	-0.247571	0.173594	-0.0455453	0.825504	-0.176725	0.413041	0.202026	0.30581	0.0708457	0.794876	-0.13118	0.511462		9.236	9.31214	8.92621	9.22395	9.1396	8.89808	9.2626	9.19521
TGME49_200290	-0.176375	0.194428	-0.172845	0.170986	-0.73818	5.16502e-09	0.00352999	0.985868	-0.561805	2.13495e-05	-0.565335	4.37829e-06		10.4824	10.344	9.68245	9.67812	10.2067	10.2737	10.2736	10.2124
TGME49_200295	1.76996	7.64722e-12	1.99359	4.90304e-16	1.09859	0.000242342	0.223634	0.475613	-0.671374	0.0225835	-0.895008	0.000467179		5.90616	6.68056	7.40977	7.38704	7.98681	8.12552	8.34363	8.20621
TGME49_200300	5.04222	0.000167431	4.22566	0.00148585	2.70069	0.103601	-0.816558	0.36382	-2.34152	0.0200875	-1.52496	0.123444		2	2.72118	2	4.13878	5.72084	5.21717	4.99086	4.52656
TGME49_200310	0.696685	3.72209e-06	0.331853	0.033238	0.526675	0.00120359	-0.364831	0.0244875	-0.17001	0.400654	0.194822	0.263382		9.84324	9.62811	10.2184	10.3051	10.5848	10.2607	9.9454	10.1851
TGME49_200320	0.393409	0.070657	0.806884	1.70782e-05	0.318994	0.204682	0.413475	0.0493353	-0.074415	0.826369	-0.48789	0.0183486		8.26521	7.95331	8.19095	8.60229	8.43122	8.58646	8.97544	8.85823
TGME49_200330	0.272827	0.0745261	0.23776	0.0996036	-0.430609	0.00883353	-0.0350669	0.872464	-0.703436	4.9634e-06	-0.668369	3.66535e-06		9.48166	9.35563	8.88855	9.06799	9.64163	9.74396	9.641	9.67282
TGME49_200340	-0.214488	0.379194	0.766313	3.71244e-05	-0.180701	0.538317	0.980801	2.05087e-07	0.0337868	0.933369	-0.947014	2.6624e-06		7.94797	7.99792	7.78248	7.80446	7.75403	7.77088	8.82055	8.63449
TGME49_200350	-0.333584	0.0176621	0.25424	0.0586068	-0.0351171	0.870795	0.587825	5.41347e-06	0.298467	0.0588294	-0.289357	0.0395169		10.2804	10.0896	10.1564	10.1516	9.80776	9.90665	10.5353	10.344
TGME49_200360	-0.296734	0.00442627	-0.144852	0.184527	-0.626263	2.91953e-10	0.151882	0.217351	-0.329529	0.00267068	-0.481411	1.15461e-06		12.8091	12.6879	12.1664	12.0837	12.5283	12.3727	12.558	12.6505
TGME49_200370	-0.0258334	0.926404	-0.00916016	0.9729	0.000644135	1	0.0166732	0.960022	0.0264775	0.94499	0.0098043	0.974497		8.3519	8.12401	8.22156	8.26184	8.24511	8.18844	8.22429	8.24505
TGME49_200375	-0.843968	0.000604028	-0.304622	0.216675	-1.26202	3.85744e-06	0.539346	0.038424	-0.418052	0.22905	-0.957397	0.000305101		8.00258	8.1637	6.86771	6.84079	7.08003	7.43262	7.87502	7.69132
TGME49_200385	-1.21003	3.63046e-19	-0.153429	0.32215	-1.09682	1.81322e-14	1.0566	8.49884e-15	0.113212	0.606512	-0.943387	1.74892e-11		10.6859	10.5689	9.51958	9.54969	9.24032	9.59709	10.5482	10.4004
TGME49_200400	-0.152861	0.419006	-0.0757449	0.692298	-0.301091	0.113246	0.0771158	0.73969	-0.14823	0.514021	-0.225346	0.216566		9.49363	9.87526	9.46306	9.33837	9.46203	9.62516	9.58107	9.65807
TGME49_200410	-0.250245	0.370603	0.309038	0.202522	-0.37886	0.209656	0.559283	0.0222006	-0.128614	0.741579	-0.687897	0.00540928		7.75468	8.01971	7.63111	7.43039	7.49236	7.79803	8.32114	8.06206
TGME49_200430	-0.406787	0.127702	-0.789932	0.00044874	0.122659	0.734921	-0.383144	0.169248	0.529447	0.0684331	0.912591	0.000108699		7.57714	7.75968	7.69794	7.85835	7.30542	7.23483	6.89737	6.90391
TGME49_200440	-0.552806	0.0982077	0.0770294	0.838316	0.0757559	0.878237	0.629835	0.0533595	0.628562	0.0896937	-0.00127349	0.997642		7.35379	6.78606	7.27034	7.09541	6.48453	6.65577	7.26718	7.08089
TGME49_200450	0.198857	0.4781	-0.270267	0.274036	-0.195538	0.565935	-0.469124	0.0571166	-0.394396	0.195703	0.0747282	0.819653		7.52213	7.75968	7.5369	7.38704	7.89936	7.77088	7.43294	7.32674
TGME49_200460	0.0895286	0.716202	0.0525798	0.825872	-0.0745599	0.806944	-0.0369488	0.900506	-0.164089	0.541891	-0.12714	0.588964		8.97772	8.67484	8.65062	8.84587	8.75396	9.08607	8.95514	8.8182
TGME49_200470	-0.342452	0.0175071	-0.111195	0.46527	-0.366133	0.0189262	0.231258	0.140818	-0.0236802	0.92769	-0.254938	0.0924435		9.88017	9.84913	9.57988	9.43376	9.56224	9.4818	9.82858	9.67713
TGME49_200590	0.644857	0.000442336	0.714534	3.10884e-05	-0.254125	0.309856	0.0696775	0.792743	-0.898982	6.90054e-06	-0.96866	1.68228e-07		8.46804	8.10374	8.02735	8.06502	8.92904	8.94743	8.97928	9.03385
TGME49_200595	4.51371	2.24783e-12	4.96574	2.22687e-15	2.28308	0.00386973	0.452027	0.316866	-2.23064	9.23538e-06	-2.68266	8.38622e-09		3.47833	2.72118	4.69657	4.88407	7.0906	6.59513	7.087	7.50217
TGME49_200700	0.246372	0.693675	0.0549155	0.930501	0.219601	0.770617	-0.191457	0.78421	-0.0267714	0.977784	0.164685	0.795839		5.65658	5.66375	6.46905	5.11416	5.94703	5.82182	5.55057	5.85112
TGME49_201100	2.77191	0.0223167	2.70651	0.0183366	1.66424	0.279664	-0.0653988	0.965386	-1.10767	0.406004	-1.04228	0.365419		2.67394	2.72118	3.74403	3.434	3.90128	4.78218	4.25332	4.41539
TGME49_201110	0.470442	0.102713	0.476761	0.0717389	0.0902429	0.840757	0.00631927	0.988272	-0.380199	0.274078	-0.386518	0.198882		7.38496	6.96147	7.56104	7.02174	7.63635	7.66669	7.6214	7.69132
TGME49_201120	-0.21921	0.175238	0.0808759	0.628758	-0.190208	0.303879	0.300086	0.0544363	0.0290022	0.911868	-0.271084	0.0847988		9.5543	9.78906	9.46945	9.49969	9.49223	9.41905	9.81844	9.69169
TGME49_201130	-0.479361	7.59496e-05	-0.453033	8.09705e-05	-0.274695	0.0479054	0.0263275	0.892199	0.204666	0.181644	0.178339	0.195067		10.4655	10.655	10.3067	10.2737	10.1126	10.0547	10.1283	10.094
TGME49_201140	0.298726	0.0899353	-0.10555	0.569429	0.157472	0.480472	-0.404276	0.014368	-0.141254	0.546438	0.263022	0.145704		8.8194	8.67484	8.86935	8.93385	9.0983	8.9873	8.66259	8.62827
TGME49_201150	-0.349965	0.0197469	0.0382735	0.831867	0.00298176	0.997417	0.388238	0.007843	0.352947	0.0342745	-0.0352917	0.857837		9.56114	9.55039	9.57396	9.54641	9.1723	9.24581	9.67568	9.50889
TGME49_201160	1.17192	0.00467235	1.46823	9.23062e-05	0.717867	0.163136	0.296312	0.536183	-0.454052	0.39389	-0.750364	0.0720501		5.26807	5.33335	6.12498	5.82681	6.31465	6.46564	6.81394	6.51837
TGME49_201170	0.364733	0.00129685	0.0639095	0.635451	0.0392379	0.82469	-0.300824	0.0114001	-0.325495	0.00748938	-0.0246715	0.874178		12.28	12.0411	12.3006	12.1089	12.5426	12.5176	12.1955	12.2628
TGME49_201180	1.41195	4.17647e-07	2.36509	4.00767e-21	1.19653	0.000119721	0.953137	6.48688e-05	-0.215419	0.578871	-1.16856	3.82589e-06		5.87722	6.10545	7.0493	7.19931	7.36756	7.32472	8.38901	8.17119
TGME49_201190	4.05591	0.0926014	3.95654	0.0802786	4.94419	0.0430179	-0.0993751	0.972843	0.888279	0.714421	0.987654	0.607992		2	2	3.74403	3.18679	2.3204	3.44842	2.94187	2.8912
TGME49_201200	-0.134982	0.73364	-0.374683	0.224153	-0.208037	0.635516	-0.239701	0.540505	-0.0730551	0.895129	0.166646	0.668323		7.03804	7.06293	6.61453	7.00272	6.95837	6.87564	6.82677	6.54124
TGME49_201210	-0.762243	0.0250244	-0.23779	0.490677	-0.658934	0.0926752	0.524453	0.152704	0.103308	0.86341	-0.421145	0.267857		7.25602	6.90013	6.12498	6.65836	6.27814	6.44288	6.88107	6.84077
TGME49_201215	-0.159597	0.836538	0.236856	0.72231	0.494871	0.518086	0.396453	0.598899	0.654469	0.390213	0.258016	0.714441		5.17603	4.96525	5.9163	5.11416	5.16312	4.6293	5.49808	5.04703
TGME49_201220	-0.209348	0.39828	-0.426635	0.0385627	-0.405438	0.115059	-0.217288	0.410333	-0.196091	0.528785	0.0211972	0.950879		8.20244	8.4364	7.80287	8.00893	8.14727	8.082	7.78149	8.01107
TGME49_201230	0.14338	0.553993	0.00102974	0.998159	-0.351117	0.156493	-0.142351	0.589164	-0.494497	0.0367565	-0.352147	0.113935		8.3519	8.57042	8.04457	8.17105	8.7672	8.40996	8.48519	8.44531
TGME49_201240	0.678493	0.0130364	0.599951	0.0198246	0.441479	0.178394	-0.0785419	0.838083	-0.237014	0.520894	-0.158472	0.629513		6.81207	7.3762	7.43611	7.62951	7.65783	7.90181	7.64332	7.75957
TGME49_201250	-0.622632	0.00062159	-0.849231	3.01609e-07	0.0477075	0.867297	-0.226599	0.307765	0.670339	0.000515857	0.896938	1.64262e-07		9.06049	9.43347	9.46306	9.15671	8.64705	8.63245	8.41189	8.41982
TGME49_201260	-0.469473	6.187e-05	-0.0700478	0.616046	-0.578623	1.27319e-06	0.399425	0.000911733	-0.10915	0.509719	-0.508575	1.26001e-05		11.736	11.4851	10.9835	11.0861	11.1002	11.1951	11.6015	11.4896
TGME49_201270	-0.0264236	0.879315	-0.188861	0.151035	0.233534	0.114124	-0.162437	0.289348	0.259958	0.0803358	0.422395	0.000723332		10.1579	10.2611	10.4844	10.4063	10.1623	10.206	9.92815	10.1084
TGME49_201380	-0.0885961	0.454382	0.58206	2.35644e-10	0.189898	0.0921384	0.670656	6.31694e-13	0.278495	0.0100446	-0.392161	4.35725e-05		12.0675	11.9489	12.1743	12.2222	11.9034	11.9392	12.6529	12.5272
TGME49_201390	-0.203082	0.0911881	0.12839	0.297291	-0.373961	0.0010661	0.331473	0.00447397	-0.170878	0.20438	-0.502351	2.77819e-06		14.1858	13.8574	13.671	13.6436	13.8476	13.8081	14.1621	14.1567
TGME49_201400	0.959763	2.46313e-15	1.3934	6.01323e-34	1.25934	2.78973e-25	0.433639	0.000540562	0.299574	0.0350635	-0.134064	0.352486		9.72032	9.67922	10.8405	11.0507	10.7237	10.583	11.17	11.0043
TGME49_201520	-0.0454549	0.808186	-0.17194	0.246306	-0.473418	0.00241988	-0.126485	0.487901	-0.427963	0.00819833	-0.301478	0.0496035		9.75055	9.70859	9.30769	9.21983	9.6126	9.75785	9.48657	9.62632
TGME49_201630	0.193057	0.173706	0.133034	0.338113	-0.544594	8.78263e-05	-0.0600232	0.745758	-0.737651	3.83156e-08	-0.677628	1.16522e-07		10.1413	10.0478	9.55004	9.55623	10.245	10.3321	10.1472	10.3039
TGME49_201640	0.720713	0.705291	2.55018	0.0639013	1.64813	0.360517	1.82947	0.212513	0.927421	0.628989	-0.902051	0.541455		2.92077	2.40519	2	4.13878	2.99618	3.02677	4.42059	3.95211
TGME49_201650	3.42728	0.0990741	5.1001	0.00618837	3.09009	0.186618	1.67282	0.16801	-0.337184	0.874602	-2.01	0.113732		2	2.40519	2.83449	3.434	3.69514	3.02677	4.88037	4.41539
TGME49_201660	3.65867	0.0736854	4.35605	0.0212641	4.11874	0.0512865	0.69738	0.623356	0.460069	0.794697	-0.237312	0.868445		2	2.40519	3.74403	3.99219	3.80189	3.25294	4.17524	3.95211
TGME49_201670	0.0817805	0.789203	-0.154347	0.54884	-0.116526	0.747489	-0.236128	0.401046	-0.198306	0.560552	0.0378215	0.912704		7.6979	7.71585	7.67601	7.52674	7.91133	7.63692	7.55358	7.55746
TGME49_201680	-0.242796	0.0349648	-0.518502	4.19965e-07	0.171303	0.183312	-0.275706	0.0172516	0.414099	0.000250162	0.689805	1.17898e-11		11.5289	11.7449	11.8039	11.8186	11.3895	11.4068	11.0769	11.1668
TGME49_201690	0.330504	0.341442	0.397632	0.194446	-0.310131	0.469647	0.0671281	0.881213	-0.640635	0.089352	-0.707763	0.0309901		6.91531	6.73428	6.82848	6.27022	7.26866	7.00556	7.16651	7.25935
TGME49_201700	-0.354371	0.0177888	-0.34759	0.0112947	0.217538	0.206873	0.00678087	0.978448	0.571909	0.000150844	0.565128	3.66814e-05		9.51492	9.53533	9.76788	9.71949	9.24506	9.08974	9.13607	9.22082
TGME49_201710	0.0834037	0.764241	0.207199	0.356341	0.445438	0.0638049	0.123795	0.669134	0.362034	0.15494	0.238239	0.309559		7.85456	8.2645	8.63933	8.39909	8.14727	8.16082	8.32265	8.2287
TGME49_201720	-0.139212	0.63685	-0.779306	0.000327131	0.316674	0.274606	-0.640094	0.00632731	0.455886	0.102096	1.09598	6.62834e-07		7.67286	7.60488	7.93802	7.96046	7.51607	7.48925	6.8437	6.91563
TGME49_201730	0.968043	0.187373	0.457102	0.543939	0.151797	0.89618	-0.510941	0.541631	-0.816245	0.356319	-0.305305	0.727042		4.9722	4.29019	5.37834	4.13878	5.99282	4.78218	5.176	4.95915
TGME49_201740	-0.0400885	0.902056	-0.144093	0.577069	-0.717361	0.0100438	-0.104005	0.751279	-0.677273	0.0186566	-0.573268	0.0289197		7.70615	7.72472	6.97938	7.04051	7.65783	7.69586	7.55871	7.5889
TGME49_201750	3.36265	0.141905	4.06478	0.0538243	-0.555764	0.89425	0.702125	0.720336	-3.91841	0.1054	-4.62054	0.0296024		2	2.40519	2	2	3.31734	3.44842	3.94365	3.75744
TGME49_201760	0.151481	0.354459	-0.137956	0.373233	-0.297426	0.068356	-0.289438	0.0577354	-0.448907	0.00372248	-0.15947	0.332961		10.3791	10.0741	9.99303	9.89221	10.4259	10.3444	10.0157	10.1751
TGME49_201770	0.0733976	0.757992	0.406168	0.0205532	0.171986	0.473488	0.332771	0.0899875	0.0985888	0.721337	-0.234182	0.244831		8.95019	8.78923	8.93547	9.12627	9.08779	8.77593	9.38689	9.15745
TGME49_201775	3.6735	1.89461e-06	4.55679	4.83881e-10	3.54169	1.14437e-05	0.883281	0.0655572	-0.13181	0.875701	-1.01509	0.0378361		2.92077	2.98024	5.37834	5.69082	5.51657	5.85668	6.60646	6.42715
TGME49_201780	-0.549077	1.73975e-09	0.0688762	0.539311	-0.816725	8.01451e-20	0.617953	1.45384e-11	-0.267648	0.0103307	-0.885601	1.3546e-23		13.9552	13.9954	13.0744	13.2354	13.4481	13.4043	14.1072	13.9785
TGME49_201785	-0.0454908	0.778532	0.186561	0.14612	-0.143472	0.345818	0.232052	0.0923329	-0.0979808	0.56645	-0.330033	0.00778232		12.0331	11.7503	11.8128	11.7004	11.9469	11.7517	12.1072	12.0633
TGME49_201790	0.361003	0.0208516	0.487139	0.000509538	0.477055	0.00323389	0.126137	0.502798	0.116052	0.588246	-0.0100845	0.96497		8.8232	8.93399	9.38409	9.32694	9.26851	9.20243	9.35773	9.36724
TGME49_201800	-0.0982629	0.534772	-0.40876	0.000869361	0.0741385	0.694102	-0.310497	0.021436	0.172401	0.305395	0.482898	0.000147628		9.87469	9.82869	9.96617	9.89221	9.77864	9.72757	9.40625	9.48254
TGME49_201810	-0.26569	0.0908328	0.0217328	0.909006	0.0261353	0.914501	0.287423	0.0689918	0.291825	0.0921664	0.0044025	0.984187		9.65789	9.73518	9.88245	9.57566	9.48424	9.37465	9.74038	9.69636
TGME49_201820	-0.195618	0.323364	0.0641046	0.75272	-0.0434039	0.877719	0.259723	0.178277	0.152214	0.5395	-0.107508	0.61391		8.63291	8.71102	8.63933	8.62112	8.48828	8.46747	8.72101	8.74947
TGME49_201830	0.210119	0.495994	0.0245012	0.943474	0.576681	0.0469367	-0.185618	0.578793	0.366562	0.251472	0.55218	0.0324422		7.2219	7.33042	7.97442	7.72545	7.27794	7.67648	7.32558	7.27536
TGME49_201840	0.152486	0.352048	0.839707	2.6963e-11	-0.089603	0.663522	0.687221	1.17722e-07	-0.242089	0.16874	-0.92931	2.82476e-12		9.54283	9.46559	9.46945	9.37211	9.76716	9.52849	10.3325	10.35
TGME49_201850	2.11092	0.00171786	2.39706	0.000141045	-0.142515	0.918412	0.286142	0.722059	-2.25343	0.00663553	-2.53957	0.000717835		4.09586	3.55856	2.83449	4.13878	5.92358	5.21717	5.99887	5.77596
TGME49_201860	-0.177237	0.240597	-0.56318	1.19058e-05	-0.434183	0.00158275	-0.385943	0.00597053	-0.256946	0.094382	0.128997	0.409979		13.3075	13.686	13.1355	13.0134	13.3899	13.271	12.8213	13.0607
TGME49_201870	-0.192774	0.370111	-0.433945	0.0158531	0.186426	0.431153	-0.24117	0.27531	0.379201	0.0769722	0.620371	0.00056385		9.31094	9.16994	9.52572	9.33837	8.85659	9.2326	8.65542	8.95085
TGME49_201880	0.609558	2.55212e-07	0.0783482	0.588715	0.321179	0.0157468	-0.53121	9.15434e-06	-0.288379	0.0362765	0.242831	0.0614508		11.434	11.2082	11.5992	11.6893	11.8906	11.9783	11.2808	11.5171
TGME49_201890	3.83741	0.134669	3.66183	0.127072	4.62145	0.0781739	-0.175576	0.952946	0.784043	0.782816	0.959619	0.659345		2	2	3.35978	3.18679	3.16567	2.42848	2.41675	3.06965
TGME49_201900	-0.100333	0.693675	0.00728288	0.978384	0.146816	0.591819	0.107616	0.693889	0.247149	0.338222	0.139533	0.556882		8.35715	8.36441	8.66183	8.3697	8.33673	8.1747	8.28287	8.44632
TGME49_202010	-0.619755	0.00011053	0.171041	0.307556	-0.365105	0.0501204	0.790796	1.76375e-07	0.254649	0.227251	-0.536147	0.00090542		9.26141	9.19889	8.77964	8.93385	8.5199	8.7155	9.45112	9.34953
TGME49_202020	3.05949	1.7622e-05	3.76774	2.00927e-08	1.76693	0.0461153	0.70826	0.226569	-1.29255	0.0674266	-2.00081	0.000727158		3.31531	3.19979	3.74403	4.88407	5.85085	5.41723	6.2795	6.36439
TGME49_202025	-1.15941	0.749475	2.31941	0.356174	-1.58412	0.679212	3.47883	NA	-0.424707	NA	-3.90353	0.159493		2	2.72118	2	2	2.3204	2	3.37342	3.37146
TGME49_202030	0.188437	0.375806	-0.0684389	0.759381	-0.353983	0.112362	-0.256875	0.223649	-0.542419	0.00982252	-0.285544	0.172363		8.85694	8.72435	8.40609	8.47005	9.00921	8.94743	8.55494	8.87409
TGME49_202040	0.60191	0.000111055	0.882752	8.19161e-10	-0.0471907	0.856937	0.280842	0.100026	-0.649101	0.000121803	-0.929943	1.00635e-09		8.95366	9.18609	8.84989	9.1524	9.59229	9.75092	9.99075	9.91101
TGME49_202050	1.32284	0.0357332	2.7342	3.22836e-07	0.112078	0.922915	1.41136	0.00600468	-1.21076	0.115014	-2.62212	1.71431e-05		3.87947	4.38279	3.35978	4.61019	5.20262	5.32067	6.73903	6.38982
TGME49_202060	3.42738	0.105239	4.51145	0.0189593	3.60788	0.10859	1.08408	0.443717	0.180501	0.936084	-0.903575	0.515311		2.37597	2	3.35978	3.64498	2.99618	3.7743	4.39785	3.92916
TGME49_202065	3.27518	0.131541	3.93398	0.0479593	4.29044	0.0476991	0.658809	0.69695	1.01526	0.547942	0.356454	0.815865		2	2.40519	3.35978	4.39365	3.69514	2.75842	3.46378	3.99693
TGME49_202070	-0.655136	0.00036084	-0.413853	0.0184391	-0.329488	0.132551	0.241283	0.273824	0.325648	0.159984	0.0843655	0.723595		8.96058	8.98659	8.45842	8.78037	8.40182	8.23555	8.64942	8.47433
TGME49_202080	-0.61514	0.0170849	0.0357303	0.908855	-0.437258	0.149338	0.65087	0.00934653	0.177882	0.642819	-0.472989	0.0782759		7.91986	7.68889	7.35561	7.40163	7.22136	7.19453	7.98209	7.69812
TGME49_202090	5.45488	0.00880394	5.5521	0.00535847	2.28174	0.478501	0.0972244	0.963727	-3.17314	0.166168	-3.27036	0.111549		2	2	2	2.51145	4.08161	3.44842	3.77742	3.97469
TGME49_202100	1.99995	0.296806	1.44734	0.435992	-0.661246	0.844563	-0.552607	0.80044	-2.66119	0.292926	-2.10859	0.362813		2.37597	2.72118	2.83449	2	3.99426	2.75842	3.2263	3.15122
TGME49_202110	1.27725	0.614987	1.19449	0.605993	1.93126	0.463013	-0.0827501	NA	0.654019	NA	0.736769	0.744318		2.37597	2.40519	2	3.64498	2.58241	3.02677	3.00342	2.51335
TGME49_202120	-0.221139	0.113778	-0.401676	0.000974154	0.0405077	0.843656	-0.180536	0.233896	0.261647	0.0860274	0.442183	0.00047626		10.0454	10.1118	10.1324	10.1078	9.92163	9.78751	9.62763	9.72704
TGME49_202140	1.087	0.601846	2.014	0.239042	1.84729	0.379622	0.927004	0.643872	0.760293	0.742507	-0.16671	0.937789		2.67394	2.40519	2	3.99219	3.16567	2.75842	3.84623	3.11101
TGME49_202160	0.0398826	0.886424	0.0191124	0.944283	0.477325	0.0366867	-0.0207703	0.949677	0.437442	0.0643339	0.458212	0.0250809		7.8912	8.1637	8.45842	8.53768	8.02036	8.12552	8.01422	8.08559
TGME49_202170	0.00453523	0.99622	0.164669	0.626766	0.363501	0.345704	0.160134	0.698563	0.358965	0.366694	0.198832	0.582573		6.68425	7.00583	7.40977	7.02174	6.70688	7.00556	7.03268	6.98958
TGME49_202180	-0.174173	0.368558	-0.546227	0.000462897	-0.118672	0.612632	-0.372054	0.033046	0.0555014	0.847682	0.427556	0.0126761		9.14485	9.20524	8.93547	9.14808	9.04768	8.95146	8.52639	8.73052
TGME49_202190	-0.464657	0.00595336	-0.386686	0.0137706	-0.151473	0.495676	0.0779708	0.742714	0.313184	0.122851	0.235213	0.201515		9.07967	9.12037	8.85966	9.01677	8.70322	8.56555	8.66498	8.76494
TGME49_202200	0.219119	0.101925	0.0808651	0.576103	-0.282238	0.0419246	-0.138254	0.378664	-0.501357	9.30964e-05	-0.363103	0.0038804		11.5049	11.2239	11.1177	11.0645	11.5076	11.6708	11.3934	11.5089
TGME49_202205	4.27337	0.00016536	3.91902	0.000423236	2.29786	0.108006	-0.354343	0.708287	-1.97551	0.0380612	-1.62116	0.06801		2.92077	2	4.04716	3.434	5.48488	5.10568	5.09349	4.90138
TGME49_202210	6.73835	5.41626e-05	6.43032	9.39223e-05	5.06477	0.00489828	-0.308028	0.641181	-1.67359	0.00851929	-1.36556	0.0224607		2.37597	2	4.5108	4.70737	6.25953	5.98825	5.87261	5.82028
TGME49_202220	-0.0342004	0.878149	-0.11585	0.529088	-0.392136	0.0403487	-0.0816495	0.727704	-0.357936	0.0722268	-0.276286	0.134754		9.26979	9.18288	9.0336	8.66412	9.19452	9.19223	9.04112	9.17889
TGME49_202230	-0.425152	0.0212853	-0.017568	0.940195	-0.396789	0.0555925	0.407584	0.0262946	0.0283631	0.934573	-0.379221	0.0451411		8.83453	8.89522	8.41935	8.51101	8.38475	8.50641	8.94047	8.75029
TGME49_202240	-0.450413	0.0874098	-0.198647	0.445863	-0.0789819	0.841362	0.251767	0.406239	0.371432	0.240362	0.119665	0.699882		7.67286	7.87577	7.74083	7.66624	7.45195	7.19453	7.46611	7.6862
TGME49_202250	-0.0999132	0.655802	0.0353433	0.874231	-0.0674673	0.815014	0.135257	0.557399	0.0324459	0.920298	-0.102811	0.64587		8.54365	8.75499	8.54568	8.61487	8.58488	8.51734	8.69676	8.67729
TGME49_202255	1.74038	5.10663e-08	1.50751	1.17181e-06	0.963956	0.0117013	-0.232864	0.55989	-0.776422	0.0338026	-0.543557	0.11823		6.21451	5.42331	7.08303	6.5314	7.61455	7.4781	7.27967	7.36358
TGME49_202280	2.22433	2.9487e-20	2.08524	5.91984e-19	0.847231	0.0053691	-0.139088	0.664041	-1.3771	7.3276e-08	-1.23801	4.09373e-07		6.23746	6.54686	7.21057	7.21592	8.49625	8.63747	8.20968	8.61665
TGME49_202285	4.36088	0.000142816	4.3349	0.000101667	3.5011	0.00516189	-0.0259751	0.98284	-0.859777	0.380333	-0.833802	0.326943		2.37597	2.72118	5.37834	3.64498	5.85085	4.70777	5.20249	5.53889
TGME49_202290	-0.192017	0.439954	-0.485089	0.0163167	-0.13736	0.650975	-0.293072	0.230707	0.0546569	0.887107	0.347729	0.135094		8.39847	8.11053	8.00992	8.21303	8.15232	7.98293	7.76604	7.80438
TGME49_202300	0.226749	0.274816	0.104201	0.614924	0.194156	0.421606	-0.122548	0.610708	-0.0325926	0.921233	0.0899553	0.697626		8.52045	8.34152	8.56967	8.67016	8.56228	8.7576	8.56263	8.51342
TGME49_202310	-0.136184	0.505801	0.0812012	0.678317	0.194946	0.371546	0.217386	0.274999	0.33113	0.102666	0.113744	0.580853		8.88628	8.74194	9.13355	8.9034	8.66837	8.69638	8.94636	8.84756
TGME49_202350	0.117526	0.600036	-0.147238	0.454102	0.289096	0.189244	-0.264764	0.195871	0.17157	0.492476	0.436333	0.0173406		8.41869	8.4364	8.7379	8.69407	8.48828	8.60196	8.21294	8.34595
TGME49_202360	0.0629041	0.83108	-0.34771	0.117662	0.184544	0.54368	-0.410614	0.0848246	0.12164	0.720775	0.532255	0.0187992		7.78616	8.13736	8.12772	8.17105	8.06927	7.9908	7.53025	7.71834
TGME49_202370	-0.220378	0.0756278	-0.420913	0.000120746	0.228794	0.0805513	-0.200535	0.128549	0.449173	0.000179762	0.649708	1.86383e-09		10.8853	10.8358	11.089	11.0895	10.6488	10.6329	10.3418	10.5325
TGME49_202375	-0.229854	0.42747	-0.106614	0.71024	0.273792	0.380932	0.12324	0.722108	0.503646	0.0807692	0.380405	0.146755		7.91275	7.64282	8.20634	7.92048	7.75403	7.31222	7.71406	7.64806
TGME49_202380	0.122923	0.308814	-0.124244	0.269346	-0.0708491	0.633666	-0.247167	0.024677	-0.193772	0.125665	0.0533945	0.69275		10.8689	10.8337	10.798	10.7663	11.0036	10.9427	10.7168	10.7381
TGME49_202390	0.53095	0.000166842	0.260824	0.0736275	-0.262196	0.127229	-0.270126	0.0858451	-0.793146	4.75984e-08	-0.52302	0.00027581		10.0486	10.0758	10.0194	9.58848	10.6497	10.5286	10.2752	10.3671
TGME49_202400	2.79222	0.0129008	4.00925	8.257e-05	2.86681	0.0161405	1.21703	0.148266	0.07459	0.963576	-1.14244	0.177543		2.37597	2.98024	3.35978	4.96491	4.08161	4.70777	5.65973	5.24581
TGME49_202410	-0.18551	0.369639	-0.0382141	0.864283	0.0634145	0.82469	0.147296	0.517002	0.248924	0.277147	0.101629	0.646103		8.5574	8.75499	8.67294	8.75785	8.45595	8.49539	8.65901	8.58214
TGME49_202420	0.308269	0.13522	-0.522559	0.00411167	-0.530543	0.0191026	-0.830828	2.547e-06	-0.838812	7.40398e-05	-0.00798416	0.979841		8.35715	8.46845	7.86235	7.91031	8.73388	8.70119	7.80545	7.9821
TGME49_202430	2.20388	7.09215e-15	1.81921	7.006e-11	0.765013	0.038931	-0.384671	0.220056	-1.43887	2.20123e-06	-1.0542	0.000360654		6.11886	5.96273	6.94311	6.63385	8.41028	7.88502	7.65055	7.93249
TGME49_202440	0.253816	0.245046	-0.0210687	0.933698	0.332323	0.156541	-0.274885	0.207186	0.0785069	0.803866	0.353392	0.0832072		8.12456	8.03406	8.3927	8.42074	8.29622	8.3683	8.01609	8.10107
TGME49_202445	1.46261	0.333904	1.11024	0.441908	0.678858	0.745065	-0.352368	0.845014	-0.78375	0.682033	-0.431382	0.800349		3.31531	2.40519	2	3.829	3.57986	4.03997	3.81224	3.30172
TGME49_202450	0.556568	0.0142405	0.582324	0.00525886	0.217902	0.473488	0.0257561	0.938701	-0.338666	0.226618	-0.364422	0.129978		7.5407	7.65216	7.69794	7.88975	8.02588	8.2618	8.23074	8.1062
TGME49_202460	-0.193314	0.327407	-0.412581	0.0123977	-0.134568	0.568687	-0.219266	0.283095	0.0587465	0.841161	0.278013	0.139477		9.06049	9.39785	9.12548	9.08618	8.9553	9.13659	8.87405	8.78185
TGME49_202470	0.256084	0.0788989	0.00924177	0.960021	0.101038	0.600315	-0.246842	0.0940381	-0.155046	0.397271	0.0917965	0.586875		9.43278	9.53028	9.63776	9.53652	9.76221	9.70862	9.49865	9.48352
TGME49_202480	-0.387011	0.0704458	-0.0401342	0.871118	-0.239098	0.36214	0.346877	0.112467	0.147913	0.627846	-0.198964	0.398831		8.29287	8.22127	8.02735	8.01843	7.9291	7.81585	8.22591	8.21097
TGME49_202490	-0.554685	0.000677235	-0.399757	0.0127363	-0.569546	0.000857706	0.154928	0.47008	-0.0148609	0.964296	-0.169789	0.376472		10.2539	10.67	9.86802	9.94298	10.0678	9.75555	10.1399	10.0131
TGME49_202500	0.0453743	0.703743	-0.426405	8.97325e-07	-0.118509	0.285479	-0.471779	8.91398e-08	-0.163884	0.126807	0.307895	0.000661011		13.1205	13.137	13.075	12.9463	13.1329	13.2148	12.6804	12.7243
TGME49_202510	-0.203171	0.361257	-0.390727	0.0353477	0.238494	0.317438	-0.187556	0.434724	0.441664	0.0447125	0.629221	0.000694833		8.62858	8.57533	8.92621	8.76351	8.5238	8.25528	8.10827	8.3142
TGME49_202520	-0.579621	0.000203801	-0.0187622	0.927326	-0.624686	0.000178359	0.560859	0.000298045	-0.0450649	0.873753	-0.605924	0.000120497		9.6769	9.91263	9.06769	9.26044	9.19696	9.24909	9.88843	9.66459
TGME49_202530	-0.269838	0.0764222	-0.0682447	0.678317	0.21205	0.214707	0.201594	0.222213	0.481888	0.0016191	0.280294	0.0558607		9.57697	9.56528	9.84854	9.7253	9.24269	9.3656	9.55946	9.44613
TGME49_202540	-0.391089	0.000761102	-0.333499	0.00271371	-0.318618	0.0120714	0.05759	0.732712	0.0724712	0.676927	0.0148812	0.932975		10.7331	10.8861	10.5462	10.4473	10.4487	10.3913	10.4748	10.4822
TGME49_202550	-0.42748	0.0205369	-0.695268	2.16866e-05	-0.61178	0.0016723	-0.267788	0.195986	-0.1843	0.470664	0.0834879	0.725397		8.97431	9.2854	8.43249	8.60229	8.72373	8.70119	8.41189	8.48223
TGME49_202568	-0.028438	0.947272	0.121778	0.721373	0.0475511	0.922915	0.150216	0.708817	0.075989	0.883433	-0.0742265	0.850977		7.01165	7.49506	7.17972	7.41608	7.45195	6.97416	7.44685	7.33112
TGME49_202572	0.207384	0.396455	-0.186512	0.409658	0.524274	0.0234238	-0.393895	0.0755487	0.31689	0.218456	0.710785	0.000383291		8.10597	7.81058	8.56967	8.41356	8.18227	8.16082	7.71406	7.84938
TGME49_202580	1.26885	2.25484e-07	1.75111	6.36171e-15	0.815709	0.00476069	0.482258	0.0449415	-0.453139	0.128402	-0.935398	8.32503e-05		6.68425	6.37714	7.43611	7.24858	7.76067	7.78904	8.24833	8.24969
TGME49_202590	0.0370209	0.915464	-0.273873	0.285983	0.0124906	0.981906	-0.310894	0.277854	-0.0245303	0.960935	0.286363	0.306476		7.57714	8.01248	8.04457	7.61706	7.88729	7.79803	7.50653	7.57234
TGME49_202600	1.43007	0.730115	2.69939	0.389408	3.84293	0.266609	1.26932	NA	2.41286	NA	1.14354	NA		2	2	2.83449	2.88828	2	2.42848	2.58724	2.31522
TGME49_202610	-0.444801	5.85222e-05	0.0299589	0.835834	-0.0293677	0.867991	0.47476	1.39301e-05	0.415434	0.000438504	-0.0593266	0.675174		11.2697	11.2694	11.1238	11.3364	10.8712	10.7763	11.3376	11.2607
TGME49_202620	0.183278	0.087568	0.474158	3.97006e-07	0.138252	0.253023	0.29088	0.00442372	-0.0450253	0.773525	-0.335905	0.000631579		11.7733	11.6083	11.8302	11.8328	11.8845	11.8684	12.1426	12.1912
TGME49_202630	0.159017	0.246552	-0.164208	0.199445	0.110386	0.495676	-0.323224	0.00952315	-0.048631	0.805295	0.274593	0.029538		10.4752	10.4361	10.497	10.6226	10.6885	10.5327	10.2352	10.3462
TGME49_202640	-0.20792	0.47068	-0.0328154	0.914359	0.431675	0.123402	0.175105	0.57811	0.639595	0.0179015	0.46449	0.0557736		7.50331	7.45296	7.82297	7.96046	7.23095	7.32472	7.48781	7.40574
TGME49_202650	0.000474656	1	0.137938	0.502319	-0.0786926	0.79808	0.137464	0.575772	-0.0791673	0.802991	-0.216631	0.320698		8.28187	8.30056	8.11147	8.28564	8.27784	8.30661	8.42882	8.42598
TGME49_202670	0.8214	0.725819	-1.72464	0.40073	-0.611153	0.849242	-2.54604	NA	-1.43255	NA	1.11349	0.668633		3.13148	2.40519	2	2.88828	2.99618	3.44842	2.116	2.45028
TGME49_202680	-0.0497962	0.737017	-0.434793	4.77622e-05	0.0695396	0.659941	-0.384997	0.000617883	0.119336	0.425595	0.504333	3.09791e-06		11.1056	11.2395	11.2442	11.2423	11.1926	11.0492	10.6848	10.7922
TGME49_202690	-0.110079	0.693675	-0.195421	0.398334	0.211964	0.453393	-0.0853426	0.788627	0.322042	0.234807	0.407385	0.0706564		7.92694	8.39808	8.36555	8.40634	8.05315	8.08934	7.95509	8.01652
TGME49_202700	0.116463	0.72645	0.281685	0.278801	0.36003	0.251776	0.165222	0.617065	0.243567	0.485829	0.0783453	0.811611		7.27833	7.1965	7.5369	7.62951	7.46012	7.22152	7.477	7.54807
TGME49_202720	-0.486546	0.172056	-0.229708	0.505666	0.0252345	0.966148	0.256838	0.540078	0.51178	0.211318	0.254942	0.503294		6.66745	7.09065	6.9059	6.92403	6.54726	6.27265	6.66953	6.67137
TGME49_202730	-0.465314	0.0614558	-0.698694	0.00134031	-0.188689	0.555657	-0.233381	0.428843	0.276624	0.382314	0.510005	0.0372699		7.94797	8.35872	7.99228	7.97029	7.78689	7.61673	7.37299	7.57604
TGME49_202740	-0.607473	0.0835829	-0.108636	0.777809	0.00258243	1	0.498837	0.175959	0.610056	0.128241	0.111219	0.791748		6.66745	7.06293	6.78815	6.94411	6.22157	6.37237	6.86458	6.67483
TGME49_202750	0.131282	0.606734	0.344872	0.0885144	0.330881	0.185137	0.21359	0.387795	0.199598	0.479954	-0.0139917	0.964588		7.98234	8.07627	8.33788	8.3697	8.18227	8.13265	8.49994	8.22987
TGME49_202760	-0.2529	0.337868	-0.284187	0.225665	-0.265865	0.374658	-0.0312866	0.93011	-0.0129649	0.977784	0.0183218	0.960303		7.92694	8.32994	7.82297	7.92048	7.85045	7.93481	7.74141	7.9681
TGME49_202770	-0.547593	1.05092e-07	-0.554347	3.13519e-08	-0.324903	0.00394826	-0.00675392	0.973394	0.22269	0.0730683	0.229444	0.0411695		12.0842	12.2852	11.9146	11.8145	11.6832	11.596	11.6131	11.6548
TGME49_202780	-0.141416	0.310901	0.118512	0.370551	0.032832	0.863741	0.259928	0.0461399	0.174248	0.251472	-0.0856799	0.562449		10.6404	10.7569	10.6112	10.8297	10.6107	10.5014	10.845	10.7902
TGME49_202790	-0.00779983	0.988544	0.465142	0.0611841	0.170196	0.642079	0.472942	0.0810202	0.177995	0.639686	-0.294947	0.305626		7.31115	7.55599	7.84279	7.38704	7.46825	7.38566	8.00672	7.77251
TGME49_202800	-0.130289	0.758184	0.238751	0.485009	0.637723	0.0773687	0.36904	0.322163	0.768012	0.0326252	0.398972	0.237523		6.63325	6.58634	7.48739	6.98345	6.40209	6.57434	6.90142	6.77795
TGME49_202810	0.0489184	0.882573	-0.15549	0.56829	0.0602821	0.879345	-0.204409	0.510417	0.0113637	0.980552	0.215773	0.454736		7.91986	7.70692	7.63111	8.04656	7.70673	8.02184	7.77268	7.55371
TGME49_202820	-0.234075	0.0773408	-0.317091	0.00770733	-0.00214434	0.999114	-0.083016	0.62553	0.231931	0.118218	0.314947	0.0125561		10.3412	10.2019	10.3138	10.2355	10.0272	10.0547	9.99217	9.9234
TGME49_202830	-0.272828	0.0342478	-0.0520668	0.731129	-0.511734	3.64072e-05	0.220761	0.11616	-0.238906	0.0952266	-0.459667	0.000138521		12.1549	11.847	11.5548	11.4443	11.6837	11.7894	12.0122	11.9008
TGME49_202840	-0.350298	0.000973178	-0.405853	5.63431e-05	-0.291824	0.0102394	-0.0555551	0.720388	0.058474	0.714625	0.114029	0.353445		11.8376	11.7963	11.4824	11.5635	11.5527	11.3734	11.3759	11.4466
TGME49_202850	0.23197	0.40916	0.469859	0.0410072	0.419328	0.146485	0.237889	0.402783	0.187358	0.586937	-0.0505316	0.874691		7.32193	7.29511	7.74083	7.70205	7.62185	7.43262	7.80545	7.73166
TGME49_202860	-0.480168	0.0122837	-0.934271	2.72579e-08	0.0867892	0.753581	-0.454103	0.0195576	0.566957	0.00560049	1.02106	4.32278e-09		8.78865	9.06205	9.05075	8.98804	8.58861	8.29394	8.01982	7.99459
TGME49_202870	-0.667812	0.0317941	-0.700145	0.0138155	-0.620413	0.072629	-0.0323328	0.947193	0.0473996	0.933588	0.0797323	0.847615		7.63878	8.17669	6.78815	7.64186	7.23095	7.32472	7.10817	7.36785
TGME49_202880	0.10996	0.74458	0.467747	0.0586068	0.120345	0.762319	0.357787	0.211579	0.0103854	0.983019	-0.347402	0.221043		7.15114	7.48465	7.38294	7.48623	7.56236	7.27404	7.79025	7.77573
TGME49_202890	-0.146708	0.308682	0.397672	0.000712419	0.35283	0.00815146	0.54438	4.11236e-06	0.499538	0.000112637	-0.0448417	0.780768		10.1306	10.1118	10.4166	10.5193	10.0381	9.90457	10.5748	10.4591
TGME49_202900	-0.270672	0.0616202	-0.191246	0.167825	0.339669	0.021115	0.0794257	0.677626	0.610341	1.04221e-05	0.530916	3.64389e-05		9.77036	9.84303	10.1244	10.1624	9.43533	9.64024	9.60361	9.629
TGME49_202920	-0.199101	0.324779	-0.281389	0.107809	-0.0212563	0.942126	-0.0822876	0.742488	0.177845	0.464065	0.260132	0.179051		8.93974	8.93781	8.74845	9.04028	8.79007	8.68673	8.5639	8.74783
TGME49_202930	1.48963	9.69506e-06	1.14295	0.000487719	1.09572	0.00420213	-0.346681	0.367615	-0.393913	0.35933	-0.0472314	0.922145		5.69024	5.90144	7.17972	6.5046	7.05866	7.37367	6.87285	6.8921
TGME49_202940	-0.0381065	0.854134	-0.360694	0.0157951	0.0764854	0.734921	-0.322588	0.0487891	0.114592	0.602745	0.43718	0.00435539		9.66637	9.78906	9.92026	9.69895	9.82051	9.53926	9.31664	9.42014
TGME49_202950	-0.121833	0.418808	-0.330708	0.00704951	0.0139061	0.949082	-0.208876	0.149245	0.135739	0.438539	0.344614	0.0081814		9.90547	9.88914	9.88723	9.93045	9.72878	9.8254	9.57031	9.56625
TGME49_202970	0.779511	0.0326843	0.791725	0.0170218	0.928907	0.0165398	0.0122132	0.982647	0.149395	0.781075	0.137182	0.745448		5.90616	5.86979	6.9059	6.65836	6.56252	6.69482	6.69773	6.57858
TGME49_202975	1.23345	0.33508	1.9077	0.0786867	1.72829	0.189335	0.674252	0.602987	0.494839	0.747366	-0.179413	0.894101		3.47833	2.40519	3.35978	4.61019	4.08161	3.44842	4.25332	4.39878
TGME49_202980	-0.0406146	0.83108	-0.461464	0.000670446	0.49778	0.000682075	-0.420849	0.00344972	0.538395	0.000253637	0.959244	1.77219e-13		9.85256	9.91457	10.4844	10.2816	9.83943	9.84723	9.29911	9.53762
TGME49_202990	5.4769	0.00812794	5.56488	0.0050318	2.28228	0.476973	0.0879797	0.967473	-3.19462	0.159894	-3.2826	0.107619		2	2	2	2.51145	3.99426	3.62054	4.03491	3.73116
TGME49_203000	4.51949	0.0647094	4.92287	0.031121	0	1	0.40338	0.876441	-3.62581	0.183565	-4.02918	0.0910085		2	2	2	2	3.16567	3.25294	3.46378	3.43799
TGME49_203010	-0.075523	0.679172	-0.0239437	0.896166	-0.391738	0.0150759	0.0515793	0.809268	-0.316215	0.0657449	-0.367794	0.0140413		9.56341	9.75264	9.21186	9.31543	9.53928	9.63272	9.65785	9.61514
TGME49_203020	-0.196457	0.461922	-0.283473	0.217453	0.085309	0.812609	-0.0870164	0.792674	0.281766	0.341669	0.368782	0.128234		8.16702	7.87577	8.02735	8.17954	7.76727	7.91013	7.86054	7.63749
TGME49_203030	0.372654	0.00536398	0.0721231	0.64053	0.138704	0.420272	-0.300531	0.0289916	-0.23395	0.137956	0.0665808	0.691651		10.1906	9.94527	10.2924	10.1408	10.4028	10.4889	10.1378	10.1539
TGME49_203040	0.00459888	0.992251	-0.126288	0.548722	-0.222662	0.373994	-0.130887	0.602374	-0.227261	0.378348	-0.0963746	0.69519		8.59343	8.44716	8.22156	8.36225	8.47624	8.58126	8.49057	8.30197
TGME49_203050	-0.552805	0.00101559	0.275817	0.0931717	-0.481574	0.00986015	0.828622	1.1101e-07	0.0712312	0.802967	-0.75739	3.90142e-06		9.27534	9.08978	8.65062	8.75217	8.64347	8.63245	9.55946	9.35599
TGME49_203060	-0.237147	0.077214	0.535799	3.33971e-06	-0.293403	0.0394469	0.772946	2.14006e-11	-0.0562564	0.783987	-0.829203	2.17528e-12		10.4286	10.2302	9.97068	10.0966	10.1074	10.0863	10.8986	10.837
TGME49_203070	2.38838	0.0404395	3.75627	0.000250509	2.29936	0.0743269	1.36789	0.106539	-0.0890197	0.958453	-1.45691	0.0970157		2.92077	2.40519	4.04716	3.99219	3.90128	4.26424	5.35194	5.08904
TGME49_203080	0.532643	0.000317494	0.36495	0.0112375	0.464662	0.00421085	-0.167693	0.341593	-0.0679807	0.772568	0.0997123	0.582001		9.00473	8.85132	9.41752	9.37211	9.48424	9.43356	9.25787	9.32721
TGME49_203090	2.29349	0.00375561	2.96803	4.06232e-05	2.10472	0.0159653	0.67454	0.340747	-0.188777	0.863121	-0.863317	0.209608		3.31531	3.19979	4.69657	4.88407	4.90025	5.04652	5.72513	5.41225
TGME49_203100	1.22067	0.54882	2.41113	0.146614	-0.649131	0.844563	1.19046	0.526437	-1.8698	0.491255	-3.06026	0.152424		2.67394	2.40519	2.83449	2	2.58241	3.44842	3.54881	3.99693
TGME49_203110	2.99957	0.186007	3.54181	0.0857036	3.67053	0.113748	0.542237	0.776441	0.670954	0.744234	0.128717	0.94736		2	2.40519	3.74403	3.434	3.45456	2.75842	3.54881	3.43799
TGME49_203120	1.13637	0.000124858	0.570361	0.0582093	0.6207	0.0865177	-0.566006	0.0619235	-0.515667	0.152303	0.0503393	0.906677		6.71728	6.21026	7.14821	7.04051	7.70673	7.45554	6.90142	7.16185
TGME49_203135	2.01957	0.00312516	2.73037	1.13253e-05	0.940048	0.315417	0.710796	0.263769	-1.07952	0.172201	-1.79032	0.00517888		3.47833	3.84564	4.5108	4.27183	5.45247	5.10568	5.82226	6.06619
TGME49_203150	-0.650886	0.0012254	-0.252281	0.21672	-0.000467747	1	0.398605	0.0665797	0.650418	0.00298943	0.251813	0.256022		8.62423	8.93399	8.60492	8.91871	8.26856	7.9908	8.57914	8.49303
TGME49_203160	-0.251479	0.190791	-0.0957207	0.622946	-0.626733	0.00126339	0.155758	0.477884	-0.375254	0.0863472	-0.531012	0.00374655		8.81177	8.81023	8.25153	8.14526	8.53932	8.58646	8.76499	8.66693
TGME49_203170	-0.144354	0.344835	-0.392007	0.0020039	0.138591	0.409229	-0.247652	0.0916915	0.282945	0.0621965	0.530597	2.9622e-05		10.5074	10.5933	10.7463	10.6365	10.3488	10.4651	10.0278	10.2794
TGME49_203175	-0.273799	0.8699	-0.0298491	0.986153	-0.37076	0.857626	0.243949	0.89681	-0.0969618	0.970446	-0.340911	0.845035		3.47833	3.3903	2.83449	3.434	3.45456	3.02677	3.70517	3.06965
TGME49_203180	-0.560758	0.0123271	-0.810449	5.74876e-05	-0.896926	0.000140329	-0.249692	0.355871	-0.336168	0.247843	-0.0864769	0.774242		8.53442	8.91085	8.07841	7.64186	8.06392	8.29394	7.89951	7.96528
TGME49_203200	2.15192	3.81105e-05	2.37665	1.34624e-06	1.24354	0.0556426	0.224725	0.712767	-0.908384	0.122143	-1.13311	0.023997		4.19299	4.19122	5.4831	5.04146	5.89974	6.2466	6.19628	6.37291
TGME49_203220	-0.203968	0.369306	-0.070713	0.764702	-0.189815	0.469148	0.133256	0.61113	0.0141538	0.971694	-0.119102	0.629125		8.53442	8.68851	8.36555	8.47005	8.24037	8.57604	8.62147	8.46139
TGME49_203230	2.22027	0.0134431	2.07706	0.0152987	0.302268	0.849058	-0.143208	0.90425	-1.918	0.0703271	-1.77479	0.0664374		3.62479	3.19979	4.29753	2.88828	4.3158	5.71189	4.99086	5.06818
TGME49_203240	-0.112326	0.476886	-0.0714001	0.642333	-0.240774	0.128531	0.0409257	0.839022	-0.128448	0.489535	-0.169374	0.265537		10.0631	10.0084	9.79358	9.79881	9.89625	9.9537	10.0567	9.86905
TGME49_203250	3.71699	0.000235931	4.2472	1.05917e-05	3.56767	0.000784591	0.530207	0.521146	-0.149325	0.897899	-0.679533	0.367656		2	3.19979	4.69657	5.31255	4.57858	5.67331	5.88084	5.46903
TGME49_203260	-0.583398	0.0654567	0.0103859	0.979089	0.0368943	0.940574	0.593784	0.0581361	0.620292	0.0806793	0.0265084	0.952822		7.44535	6.91571	7.29933	7.19931	6.65086	6.63584	7.28278	7.15197
TGME49_203270	-0.410679	0.320711	-0.478231	0.191153	-0.444228	0.342879	-0.067552	0.905388	-0.0335495	0.964296	0.0340025	0.952605		7.24474	6.64361	6.05871	6.84079	6.73409	6.39626	6.61635	6.41481
TGME49_203280	-0.194083	0.394088	-0.0696245	0.767162	0.161007	0.542422	0.124458	0.637193	0.355089	0.131307	0.230631	0.289474		8.34663	8.51011	8.76932	8.42789	8.24037	8.23555	8.31053	8.40846
TGME49_203290	0.790574	1.66247e-13	1.36437	1.4135e-42	1.2971	1.26066e-34	0.573795	3.48791e-08	0.506527	6.14402e-06	-0.0672683	0.619201		9.86919	9.82044	11.1379	11.1393	10.5641	10.7028	11.1838	11.2273
TGME49_203300	0.841574	2.09139e-12	2.11655	7.96601e-79	1.1038	1.18587e-20	1.27497	5.26484e-28	0.262227	0.0687737	-1.01274	2.98426e-18		11.4228	11.4588	12.5104	12.5747	12.156	12.3984	13.707	13.3871
TGME49_203310	-0.623713	4.01905e-16	-0.158963	0.0618304	-0.835023	2.16449e-28	0.46475	5.28117e-09	-0.21131	0.0191267	-0.67606	6.20232e-19		15.311	15.2351	14.4633	14.4141	14.6499	14.6499	15.1416	15.0871
TGME49_203320	-0.422394	0.0279898	0.183221	0.352271	-0.155601	0.528609	0.605615	0.000874803	0.266793	0.251886	-0.338822	0.0830481		9.23884	9.46294	9.09274	9.28426	8.93492	8.93525	9.73245	9.31288
TGME49_203330	2.33838	0.012749	3.91016	2.46993e-06	3.40353	0.000179069	1.57178	0.0170302	1.06515	0.181982	-0.506632	0.487097		3.13148	2.72118	5.75827	5.11416	3.90128	4.98484	6.16295	5.59099
TGME49_203340	2.0031	0.00993857	2.15051	0.00287801	1.09046	0.281007	0.147409	0.878664	-0.912643	0.320499	-1.06005	0.172258		3.47833	3.55856	3.74403	4.61019	4.94753	5.21717	5.1893	5.2365
TGME49_203350	-0.132332	0.636404	-0.16873	0.48806	-0.0838998	0.818152	-0.0363984	0.917956	0.0484321	0.903606	0.0848305	0.773106		8.0552	8.01971	8.20634	7.72545	7.81902	7.99862	7.84171	7.90041
TGME49_203358	-0.208955	0.341137	-0.0574365	0.803564	-0.154435	0.562009	0.151519	0.536066	0.0545208	0.873392	-0.0969981	0.690171		8.33604	8.38135	8.25153	8.17105	8.15735	8.1468	8.30748	8.29638
TGME49_203362	0.0756396	0.80209	0.0395745	0.891052	0.197564	0.525132	-0.0360651	0.919906	0.121924	0.729286	0.157989	0.567815		7.98234	7.61446	8.14379	7.88975	7.82536	7.95103	7.83749	7.86458
TGME49_203370	-0.264892	0.0987114	-0.699011	2.83197e-07	-0.104587	0.615772	-0.43412	0.0039034	0.160305	0.430161	0.594425	4.41596e-05		9.55658	9.69962	9.46945	9.56921	9.4374	9.28472	8.87096	8.99433
TGME49_203375	3.48998	6.83398e-05	3.21597	0.000154902	4.27486	8.94637e-07	-0.274008	0.716461	0.784882	0.236628	1.05889	0.0493538		2.92077	2.72118	5.9163	6.06548	5.03766	5.50774	4.99086	5.07865
TGME49_203380	-0.456589	0.00123802	-0.225828	0.106024	-0.0644696	0.762122	0.230761	0.147226	0.392119	0.0137798	0.161358	0.312264		9.66637	9.71529	9.53184	9.69895	9.28241	9.18539	9.45181	9.48007
TGME49_203390	-0.284032	0.0331907	-0.404275	0.000772064	-0.545764	4.30091e-05	-0.120242	0.4637	-0.261731	0.0895881	-0.141489	0.348283		10.29	10.4428	9.88723	9.77098	10.1345	10.0301	9.94932	9.98031
TGME49_203400	-0.0250926	0.899311	-0.496518	0.000180471	0.0961066	0.631583	-0.471425	0.000669295	0.121199	0.546818	0.592624	1.55958e-05		9.52428	9.50475	9.51341	9.68411	9.51986	9.45646	9.04935	8.99364
TGME49_203420	-0.647147	0.02213	-0.795424	0.00144344	-0.400874	0.235935	-0.148277	0.699879	0.246274	0.538581	0.39455	0.199313		7.70615	7.5054	7.32774	7.13088	7.13211	6.78806	6.83526	6.83769
TGME49_203430	-0.487754	0.359706	-1.30399	0.002384	-0.0882123	0.90833	-0.816236	0.111934	0.399541	0.546118	1.21578	0.00970017		5.90616	6.18477	5.98926	5.95107	5.89974	5.1625	4.84718	4.88954
TGME49_203440	-0.446798	0.434201	-0.27029	0.610801	-0.0146871	0.992805	0.176507	0.805304	0.432111	0.538449	0.255603	0.671034		5.47536	5.83743	5.37834	5.82681	5.20262	5.32067	5.3985	5.43686
TGME49_203450	-0.487335	0.0116877	-1.02294	2.39293e-09	0.288017	0.190263	-0.535601	0.00563258	0.775352	5.44093e-05	1.31095	2.34348e-14		9.19261	9.66777	9.7258	9.7426	9.06654	8.84699	8.30595	8.54866
TGME49_203460	-0.523864	0.384731	-0.111967	0.858479	0.166205	0.839223	0.411897	0.535697	0.690069	0.304223	0.278172	0.657025		5.62211	5.33335	5.26537	5.86943	4.9933	5.04652	5.47654	5.29151
TGME49_203480	-0.200729	0.46407	-0.131021	0.618905	-0.142251	0.66731	0.0697074	0.843139	0.0584776	0.887911	-0.0112299	0.975257		8.19073	8.5456	8.43249	8.05582	8.39757	7.90181	8.23716	8.25892
TGME49_203490	-0.00247982	0.996982	-0.313992	0.0831861	0.483588	0.0154959	-0.311512	0.121025	0.486068	0.0168805	0.797579	3.06093e-06		8.33604	8.41463	8.95381	8.76915	8.39331	8.35007	8.06923	8.06206
TGME49_203500	6.31112	0.000716127	5.62872	0.00212137	5.33474	0.00820336	-0.682395	0.579807	-0.976381	0.480609	-0.293986	0.829809		2	2	4.04716	3.434	4.63742	4.26424	3.74175	4.10325
TGME49_203505	1.45665	0.604695	3.9596	0.0632208	3.00657	0.246511	2.50295	0.185686	1.54992	0.510243	-0.953033	0.601632		2	2.40519	3.74403	2.51145	2.58241	2.42848	4.03491	3.47013
TGME49_203510	-0.251464	0.120244	0.0344757	0.855625	0.0312738	0.899246	0.28594	0.0750004	0.282738	0.116303	-0.00320183	0.988386		9.44269	9.34991	9.40424	9.44789	9.04768	9.24909	9.40696	9.45569
TGME49_203520	-0.565437	0.0366557	-0.082671	0.790028	-0.335475	0.303879	0.482766	0.0843689	0.229961	0.5395	-0.252804	0.403386		7.71435	8.03406	7.58478	7.52674	7.29632	7.36159	7.99541	7.57973
TGME49_203540	-1.06162	1.07385e-12	0.217355	0.187355	-0.801379	4.49223e-07	1.27898	5.21505e-18	0.260242	0.192421	-1.01873	1.13548e-11		10.563	10.6339	9.53184	9.99684	9.47821	9.6048	10.9488	10.6697
TGME49_203560	-0.296434	0.321534	0.5804	0.0212641	-0.0319412	0.940674	0.876833	0.000591879	0.264492	0.45386	-0.612341	0.0209277		8.50161	8.20233	8.14379	8.47005	7.59241	8.44474	9.04387	8.81898
TGME49_203570	2.92771	0.204682	4.199	0.0396221	2.53111	0.345714	1.27128	0.447498	-0.396606	0.881982	-1.66789	0.31735		2.37597	2	3.35978	2.51145	2.99618	3.25294	4.22776	3.59201
TGME49_203590	2.24265	2.22903e-05	2.08995	3.63184e-05	2.45132	7.39035e-06	-0.152703	0.812701	0.208675	0.762662	0.361378	0.484347		4.28399	3.84564	5.83945	6.47731	6.10131	5.95646	5.91327	5.86932
TGME49_203600	-0.126039	0.338242	-0.281987	0.010645	-0.178464	0.196073	-0.155947	0.247641	-0.0524248	0.773824	0.103523	0.447211		10.7179	10.6066	10.5063	10.4682	10.511	10.566	10.3559	10.4082
TGME49_203610	-0.142376	0.560651	-0.14168	0.521732	0.222209	0.384253	0.000696336	0.997766	0.364585	0.127881	0.363889	0.081901		8.54825	8.31826	8.84989	8.48383	8.27321	8.32539	8.22429	8.36851
TGME49_203620	-0.12038	0.619808	-0.0675742	0.77328	0.189026	0.464291	0.0528059	0.856905	0.309407	0.204095	0.256601	0.231386		8.29833	8.1637	8.41935	8.42074	8.08521	8.1468	8.21457	8.11892
TGME49_203630	0.404883	0.00348386	-0.0936852	0.558756	0.0448921	0.832811	-0.498568	0.00029151	-0.359991	0.0153691	0.138577	0.38342		12.4914	12.3959	12.4631	12.5143	12.9605	12.7275	12.1332	12.5395
TGME49_203665	-0.420386	0.0915948	-0.228328	0.34761	0.567686	0.0215345	0.192058	0.524321	0.988072	2.69647e-05	0.796014	0.000229839		8.0552	8.06932	8.80006	8.45613	7.38484	7.89344	7.8522	7.82317
TGME49_203682	2.45696	0.0794021	3.51359	0.00483899	2.34532	0.132568	1.05662	0.362975	-0.111646	0.95572	-1.16827	0.301845		2	2.98024	4.29753	3.18679	3.90128	3.7743	4.39785	4.90138
TGME49_203685	-0.775901	0.773565	2.22767	0.213435	1.05345	0.683894	3.00357	0.161858	1.82935	0.49522	-1.17421	0.55302		2.37597	2.72118	2	3.434	2.58241	2	3.70517	3.64929
TGME49_203688	-0.154876	0.947278	1.45346	0.360072	-0.443296	0.875797	1.60834	0.381372	-0.28842	0.928765	-1.89676	0.321669		2.92077	2.72118	2.83449	2.51145	2.99618	2.42848	3.84623	3.40511
TGME49_203690	-0.448576	0.00265246	-0.159562	0.302085	-0.194517	0.292951	0.289014	0.0706049	0.25406	0.167918	-0.0349541	0.864028		9.54972	9.63284	9.48215	9.32694	9.19206	9.0934	9.4953	9.36884
TGME49_203700	0.675463	5.52449e-05	0.0413963	0.852581	0.10435	0.680936	-0.634067	8.66862e-05	-0.571113	0.002311	0.062954	0.784964		8.84951	8.55558	8.81017	8.81893	9.42493	9.33503	8.66735	8.83141
TGME49_203705	-2.03369	0.130466	-1.31634	0.253973	-1.12563	0.477751	0.717341	0.686352	0.908056	0.641378	0.190715	0.914031		4.19299	4.08497	2.83449	3.64498	3.16567	2.42848	3.50692	2.93792
TGME49_203710	-0.893836	1.45597e-14	-0.893307	3.3521e-16	-0.237652	0.0934377	0.00052926	0.99741	0.656184	2.36927e-07	0.655655	2.2963e-08		10.5833	10.6339	10.4067	10.3415	9.69801	9.7393	9.79089	9.64404
TGME49_203720	1.17649	3.75325e-10	1.16632	1.06327e-10	0.873496	2.48627e-05	-0.0101708	0.975606	-0.302999	0.203757	-0.292828	0.16724		8.03569	7.63343	8.8202	8.62112	9.14214	8.86423	8.96774	9.03855
TGME49_203730	-0.253187	0.25667	-0.361569	0.0597812	0.0284284	0.931434	-0.108382	0.695095	0.281616	0.267271	0.389997	0.0588073		8.40861	8.41463	8.32384	8.52441	8.03685	8.28757	8.09065	8.01924
TGME49_203735	-0.8868	0.296467	-0.407426	0.611074	-1.17748	0.235506	0.479374	0.635523	-0.290676	0.837385	-0.770049	0.418716		5.17603	4.46982	4.04716	3.829	4.3158	3.91324	4.50813	4.54177
TGME49_203740	0.532613	0.0100385	-0.0916404	0.704582	-0.148068	0.620003	-0.624254	0.00139865	-0.680681	0.00269418	-0.0564272	0.843664		8.11219	8.21498	8.07841	7.97029	8.7639	8.60708	7.92757	8.20263
TGME49_203750	0.0963601	0.736615	-0.189594	0.420295	0.301308	0.267404	-0.285955	0.255665	0.204948	0.49629	0.490902	0.0273389		7.89842	7.87577	8.35178	8.03724	7.86899	8.09665	7.71636	7.6862
TGME49_203760	0.165402	0.47401	-0.0187441	0.943287	0.232083	0.351397	-0.184147	0.447005	0.0666808	0.838646	0.250827	0.24685		8.47771	8.4364	8.84006	8.55084	8.43951	8.79403	8.43022	8.44733
TGME49_203770	3.10197	8.04626e-05	2.71931	0.000388364	3.13369	0.000133865	-0.382653	0.626197	0.0317176	0.977845	0.41437	0.560619		3.62479	2.40519	5.14279	5.82681	5.77426	5.21717	5.36372	4.99273
TGME49_203780	-0.372797	0.0170803	-0.296434	0.0421361	0.0367942	0.879345	0.076363	0.722007	0.409591	0.0164734	0.333228	0.031335		9.33508	9.2854	9.39084	9.31157	8.97824	8.89808	9.05572	8.97695
TGME49_203790	0.854482	2.52637e-10	0.886067	1.65683e-11	-0.00592529	0.987688	0.0315849	0.888731	-0.860407	1.59055e-09	-0.891992	5.55607e-11		10.2269	9.80797	10.0063	10.0464	10.9444	10.8233	10.8981	10.9365
TGME49_203800	2.957	1.90456e-12	4.36898	1.09612e-28	1.12081	0.0540467	1.41198	1.17337e-06	-1.8362	1.60043e-05	-3.24818	1.01707e-17		4.19299	4.29019	4.69657	5.43111	7.1115	6.63584	8.38613	8.17851
TGME49_203810	-0.238302	0.16768	0.177379	0.283163	-0.250226	0.189244	0.41568	0.00926501	-0.0119245	0.970128	-0.427605	0.00759145		9.60812	9.6539	9.21946	9.50308	9.33001	9.4593	9.92467	9.68185
TGME49_203815	1.25701	0.000434321	1.48463	7.06626e-06	2.06918	2.04648e-09	0.227624	0.604472	0.812172	0.0248476	0.584548	0.0798377		5.69024	5.77045	8.11147	7.26464	6.8255	7.02101	6.98007	7.28669
TGME49_203820	-0.414987	0.000376076	-0.0985709	0.443632	-0.411482	0.000982747	0.316416	0.0086256	0.00350471	0.988526	-0.312911	0.00985898		10.6241	10.6149	10.2669	10.1602	10.1408	10.272	10.512	10.5304
TGME49_203830	-0.655955	0.000259813	-0.965521	1.65922e-09	0.00224624	1	-0.309566	0.130755	0.658201	0.000763058	0.967767	1.03985e-08		8.84578	8.83092	8.94467	8.75217	8.24511	8.12552	7.84801	7.91945
TGME49_203840	-0.598883	0.0166295	-0.231437	0.354983	-0.452486	0.119756	0.367446	0.182111	0.146397	0.7034	-0.221049	0.448723		7.78616	8.00522	7.27034	7.57904	7.27794	7.3494	7.73462	7.60709
TGME49_203860	0.0110209	0.980778	0.0343988	0.912389	0.106635	0.783536	0.0233779	0.952946	0.0956138	0.816075	0.0722359	0.825893		7.47462	7.43144	7.63111	7.49986	7.56993	7.33711	7.51183	7.46277
TGME49_203870	0.572707	0.000684099	0.57992	0.000243295	0.470631	0.0122386	0.00721265	0.979719	-0.102076	0.682033	-0.109289	0.595656		8.39337	8.63303	8.92621	9.02622	9.04768	9.12233	9.03284	9.1463
TGME49_203875	1.17639	2.30849e-05	1.38581	7.59861e-08	1.13231	0.000161927	0.20942	0.537323	-0.0440817	0.928214	-0.253501	0.413522		6.44888	6.30797	7.46198	7.48623	7.72041	7.26109	7.76159	7.6862
TGME49_203880	-0.27277	0.0704682	-0.037101	0.835078	-0.509145	0.000861132	0.235669	0.138802	-0.236375	0.191719	-0.472044	0.00104253		9.71828	9.96037	9.36365	9.31543	9.54313	9.60223	9.80986	9.80315
TGME49_203890	2.47545	1.05222e-08	2.63539	1.53909e-10	2.27096	9.8381e-07	0.159945	0.745989	-0.204487	0.712714	-0.364433	0.38363		4.28399	4.46982	6.46905	6.36263	6.72055	6.46564	6.77477	6.7422
TGME49_203900	4.94011	0.00787087	5.69068	0.00131242	5.02646	0.00882643	0.750565	0.477462	0.0863509	0.959124	-0.664214	0.507567		2.37597	2	4.29753	4.79842	3.31734	5.21717	5.16257	5.17931
TGME49_203910	-0.257881	0.0656792	-0.0858197	0.561716	-0.243016	0.118636	0.172061	0.27107	0.0148646	0.954567	-0.157196	0.298881		9.97198	10.0914	9.77306	9.80432	9.72539	9.8276	9.9988	9.89408
TGME49_203930	0.299889	0.161829	-0.171838	0.424148	-0.950563	1.59634e-05	-0.471727	0.0185672	-1.25045	4.95424e-09	-0.778725	0.000228975		8.72105	8.5456	7.97442	7.45858	8.97824	8.88548	8.36283	8.56177
TGME49_203940	0.468942	0.0552613	0.0754883	0.790684	0.262221	0.396576	-0.393453	0.107922	-0.206721	0.528941	0.186732	0.503122		7.40537	7.42056	7.60813	7.7138	7.89936	7.84218	7.44962	7.52148
TGME49_203950	-0.727839	0.000202639	-0.456092	0.0161786	-0.405114	0.0748686	0.271747	0.249158	0.322725	0.197694	0.0509774	0.852094		8.92567	9.21786	8.41935	8.8565	8.41869	8.28757	8.72216	8.52494
TGME49_203960	0.0319809	0.906291	-0.0595531	0.80173	-0.142809	0.607678	-0.0915339	0.733186	-0.17479	0.532255	-0.0832561	0.743838		8.24836	8.36441	8.23662	8.11015	8.41028	8.25528	8.24036	8.25546
TGME49_203970	-0.21961	0.43599	-0.260623	0.288096	0.26953	0.378184	-0.0410129	0.91221	0.48914	0.0842245	0.530153	0.0275672		7.53144	7.60488	7.88164	7.79343	7.41037	7.28688	7.31348	7.31351
TGME49_203980	-0.608087	1.92177e-08	-0.0831858	0.513227	-0.172572	0.201513	0.524902	1.32672e-06	0.435515	0.0002631	-0.0893863	0.510829		11.082	11.0921	10.838	10.9783	10.5218	10.4352	11.0619	10.9444
TGME49_203985	1.23461	0.230491	1.37145	0.137537	1.17102	0.320958	0.136837	0.916218	-0.0635933	0.970248	-0.20043	0.86332		3.62479	3.19979	3.35978	4.70737	4.08161	4.54633	4.52921	4.33038
TGME49_203990	0.613009	2.47059e-07	-0.150238	0.262387	0.200396	0.17845	-0.763248	3.19965e-11	-0.412614	0.00176424	0.350634	0.00520053		10.6468	10.4115	10.7143	10.7521	11.1623	11.1298	10.3022	10.4621
TGME49_204000	3.09261	0.00209327	3.31371	0.000507623	1.04699	0.49413	0.221107	0.835143	-2.04561	0.0588294	-2.26672	0.018127		2.92077	2.72118	2.83449	3.64498	4.9933	4.85294	4.91281	5.30047
TGME49_204010	3.17557	2.27174e-11	3.63784	9.654e-16	3.74572	3.56108e-15	0.462271	0.219864	0.570151	0.153647	0.10788	0.798642		3.75774	3.97026	7.08303	7.26464	6.77398	6.46564	7.20304	6.95308
TGME49_204020	0.234641	0.0750281	-0.296648	0.0169587	0.234891	0.087762	-0.531289	1.23229e-05	0.000250129	0.999273	0.531539	6.88659e-06		13.7264	13.6753	13.9701	13.9015	14.0112	13.8555	13.2091	13.5764
TGME49_204040	-0.108766	0.707908	0.261387	0.253824	-0.273475	0.353526	0.370153	0.129785	-0.164709	0.627286	-0.534861	0.0228406		8.11839	7.85166	7.78248	7.67828	7.94666	7.81585	8.36577	8.12777
TGME49_204045	0.95722	0.114255	2.10197	3.25894e-05	1.06174	0.109698	1.14475	0.0272535	0.104521	0.911239	-1.04023	0.0529072		4.59957	4.46982	4.5108	5.91083	5.45247	5.26985	6.59151	6.26252
TGME49_204050	-0.866834	8.80874e-19	-0.362262	0.000462284	-0.748119	7.37767e-14	0.504572	1.14853e-06	0.118716	0.387344	-0.385857	0.000203945		14.1996	14.1051	13.387	13.4228	13.2293	13.3423	13.9064	13.6657
TGME49_204055	-0.423249	0.102451	-0.188886	0.459582	-0.358146	0.237511	0.234363	0.432466	0.0651033	0.883971	-0.16926	0.574229		7.65592	7.92279	7.38294	7.48623	7.34126	7.42102	7.64332	7.57419
TGME49_204060	-0.836271	1.47271e-05	0.0499542	0.834167	-0.528248	0.0168548	0.886225	1.74932e-06	0.308023	0.239504	-0.578202	0.00386567		8.58002	8.63774	8.12772	8.05582	7.88121	7.66669	8.74148	8.57199
TGME49_204070	-0.37788	0.012862	0.269434	0.0618435	-0.490655	0.00236128	0.647313	3.13708e-06	-0.112776	0.611627	-0.760089	1.21312e-07		9.53126	9.71751	9.21946	9.07256	9.3233	9.16815	9.88945	9.89999
TGME49_204080	-0.629173	0.000109634	0.20527	0.223105	-0.576612	0.00117227	0.834444	6.30386e-08	0.0525617	0.85779	-0.781882	1.21377e-06		9.31094	9.55537	8.88855	8.84587	8.88115	8.73436	9.73472	9.54329
TGME49_204090	-4.72062	0.0344477	1.03677	0.505666	-0.919618	0.693126	5.75739	0.00820169	3.80101	0.158337	-1.95638	0.277285		2.67394	3.70923	2	3.18679	2	2	3.84623	4.0826
TGME49_204100	-0.537149	0.00316071	0.0135271	0.955235	-0.398217	0.0528471	0.550676	0.00218274	0.138932	0.602212	-0.411744	0.0285513		9.04756	9.42805	8.83017	8.8723	8.73388	8.69638	9.36581	9.15251
TGME49_204110	-0.157744	0.627182	-0.00488099	0.989641	0.267164	0.428934	0.152863	0.665262	0.424908	0.186944	0.272045	0.350701		7.23336	7.5054	7.56104	7.69021	7.27794	7.15307	7.46611	7.26852
TGME49_204120	-0.239894	0.448549	-0.348161	0.202522	0.51021	0.0901719	-0.108267	0.783876	0.750104	0.0100053	0.85837	0.000729888		7.37464	7.85974	8.29535	7.98974	7.47633	7.31222	7.11167	7.45275
TGME49_204130	-0.13863	0.207189	0.199083	0.0467828	-0.702506	8.77288e-14	0.337712	0.000676628	-0.563877	6.52677e-09	-0.901589	4.38362e-23		12.9423	12.851	12.1396	12.2451	12.7049	12.8118	13.151	13.0399
TGME49_204140	0.0235601	0.950833	0.371519	0.154007	-0.104554	0.803996	0.347959	0.241575	-0.128114	0.759035	-0.476074	0.0882709		7.30029	7.86778	7.63111	7.40163	7.56993	7.69586	8.0764	7.86458
TGME49_204150	-0.584764	0.136576	0.197113	0.613558	-0.234809	0.649041	0.781878	0.0345371	0.349955	0.500185	-0.431923	0.287508		6.5623	6.60568	5.98926	6.58353	6.0372	6.01935	6.90142	6.63639
TGME49_204160	-0.322946	0.0494797	-0.282182	0.0675913	-0.143249	0.488735	0.0407636	0.865219	0.179696	0.387671	0.138933	0.452039		9.54513	9.76129	9.46945	9.54969	9.19941	9.46778	9.41051	9.34086
TGME49_204270	0.275127	0.0795793	-0.10569	0.524418	-0.235298	0.200984	-0.380818	0.0105075	-0.510425	0.00164555	-0.129608	0.47273		9.40517	9.54288	9.14158	9.31543	9.71348	9.78525	9.29296	9.44158
TGME49_204280	-0.445134	0.00215945	0.117162	0.453082	-0.194417	0.276902	0.562297	4.69946e-05	0.250718	0.159526	-0.311579	0.0375736		9.74655	9.81837	9.4502	9.69303	9.33001	9.3504	9.97018	9.82584
TGME49_204290	1.61245	0.308498	2.86561	0.0281177	2.90129	0.049955	1.25316	0.321964	1.28884	0.355471	0.0356866	0.981314		2	2.98024	4.04716	4.27183	3.31734	3.25294	4.17524	4.1236
TGME49_204300	0.876929	0.728099	2.54678	0.170105	2.30174	0.306189	1.66985	0.397973	1.42481	0.529545	-0.245044	0.906692		2.67394	2	3.74403	2.88828	2.80408	2.42848	3.77742	3.11101
TGME49_204310	-0.180497	0.120379	-0.208919	0.0507685	-0.0224066	0.898707	-0.0284218	0.865219	0.15809	0.23857	0.186512	0.105625		10.9759	11.0371	10.9968	10.9734	10.7851	10.8688	10.8331	10.7629
TGME49_204315	-0.415844	0.33912	0.181972	0.669231	-0.133389	0.826157	0.597817	0.155254	0.282456	0.61224	-0.315361	0.480552		6.95739	6.37714	5.98926	6.90366	6.35027	6.2466	7.02899	6.70553
TGME49_204320	-0.517116	0.00806808	-0.249902	0.194747	-0.973853	3.22608e-06	0.267214	0.22886	-0.456737	0.0622373	-0.723951	0.000350463		8.63291	8.75065	7.74083	7.72545	8.1872	8.1747	8.354	8.52876
TGME49_204325	2.58889	4.56907e-17	2.72434	3.33299e-20	2.7313	6.45779e-18	0.135447	0.713258	0.142408	0.724347	0.00696107	0.986245		5.65658	4.62953	7.90068	7.79343	7.69985	7.70545	7.71406	7.94541
TGME49_204330	2.36121	2.88069e-17	2.63681	4.80083e-23	2.15184	3.73469e-13	0.275597	0.362763	-0.209375	0.564446	-0.484972	0.0705018		5.81755	5.46627	7.40977	7.92048	8.05854	7.76171	8.16155	8.22635
TGME49_204340	0.131471	0.20899	0.381143	1.73996e-05	0.0883972	0.467916	0.249672	0.0102332	-0.0430735	0.767214	-0.292745	0.00162554		11.9197	11.9018	11.9709	12.0242	12.0105	12.074	12.3278	12.2547
TGME49_204350	-0.101457	0.678133	-0.428408	0.0198523	-0.189402	0.461996	-0.326951	0.121806	-0.0879454	0.779728	0.239006	0.277597		8.43367	8.75932	8.3927	8.435	8.55084	8.45046	8.20641	8.15522
TGME49_204360	-0.0250399	0.945941	0.336934	0.17744	-0.205144	0.554884	0.361974	0.195405	-0.180104	0.628989	-0.542078	0.0381646		7.8912	7.58552	7.35561	7.67828	7.91728	7.4781	8.07461	8.08429
TGME49_204370	0.155337	0.287707	0.138063	0.310028	0.153983	0.347563	-0.0172742	0.930769	-0.001354	0.994897	0.0159202	0.933586		9.80149	9.78906	9.91559	9.97505	10.0022	9.89202	9.90465	9.95994
TGME49_204380	-0.321488	0.0632577	-0.48445	0.00141242	-0.148457	0.500134	-0.162962	0.423802	0.173031	0.442761	0.335992	0.0504476		9.02465	9.17642	8.91688	8.9832	8.79331	8.77137	8.57788	8.66259
TGME49_204390	0.509259	0.198235	0.882599	0.00826438	1.22843	0.000757457	0.373341	0.363156	0.719173	0.0664785	0.345833	0.356366		6.19118	5.96273	7.51236	7.02174	6.24067	6.85854	6.9953	6.85606
TGME49_204395	1.21823	2.54476e-05	1.58782	1.91144e-09	1.38467	4.66158e-06	0.369593	0.225958	0.166444	0.681515	-0.203149	0.528597		5.96234	6.23532	7.38294	7.47247	7.12184	7.42102	7.66253	7.60347
TGME49_204400	-0.128225	0.343076	-0.390978	0.000545078	0.0385368	0.832204	-0.262753	0.0380864	0.166761	0.2449	0.429514	0.000158706		12.0053	12.2247	12.1406	12.173	12.0692	11.9063	11.6431	11.8083
TGME49_204410	0.209175	0.240987	0.208486	0.201058	-0.172489	0.423351	-0.000689414	0.99741	-0.381664	0.0435585	-0.380975	0.0234443		8.97431	8.83092	8.69492	8.76351	9.13705	9.08607	9.08627	9.13695
TGME49_204420	1.44723	9.88916e-09	1.27193	1.8896e-07	0.687675	0.0268852	-0.175302	0.592903	-0.759556	0.00830263	-0.584255	0.0308448		6.87196	6.48553	7.46198	7.28052	8.28706	7.88502	7.88323	7.9821
TGME49_204440	1.33153	2.76603e-09	1.31667	7.52628e-10	-0.482101	0.149338	-0.0148622	0.969147	-1.81363	7.79352e-12	-1.79877	7.11383e-13		7.07673	6.94638	6.61453	6.5046	8.43537	8.18159	8.29676	8.31088
TGME49_204460	2.2197	0.0697332	1.69666	0.154897	1.02102	0.541888	-0.52304	0.70726	-1.19868	0.410546	-0.675644	0.62045		2.92077	2.98024	3.35978	3.64498	4.90025	3.62054	3.41931	4.41539
TGME49_204468	0.291711	0.947272	-2.24871	0.527576	-2.08496	0.642763	-2.54042	NA	-2.37667	NA	0.163749	NA		2.92077	2	2	2	2.80408	2.42848	2	2.24264
TGME49_204480	-0.275366	0.0200031	-0.183037	0.120749	-0.221723	0.0862716	0.0923291	0.552389	0.0536431	0.761922	-0.038686	0.798554		11.9175	11.6642	11.5608	11.5884	11.4902	11.5535	11.6622	11.5644
TGME49_204490	0.78607	1.46245e-08	0.898213	1.199e-11	0.841323	4.25471e-09	0.112143	0.556351	0.0552528	0.811568	-0.0568904	0.757235		9.36666	9.45496	10.2888	10.2129	10.3488	10.0109	10.2689	10.3405
TGME49_204500	0.640197	0.0359072	0.969099	0.000289513	0.652201	0.0529412	0.328902	0.311993	0.0120034	0.982423	-0.316899	0.320698		6.70086	6.42148	7.32774	7.09541	7.08003	7.2996	7.6066	7.40782
TGME49_204505	2.90083	0.314911	3.53078	0.157643	4.35706	0.114981	0.62995	NA	1.45622	NA	0.826273	0.727853		2	2	3.35978	2.88828	2.58241	2.42848	2.66549	2.79295
TGME49_204510	-0.00262892	0.995695	0.388829	0.00571894	-0.0726785	0.746745	0.391458	0.00857896	-0.0700496	0.767274	-0.461507	0.00181073		9.49601	9.47087	9.27888	9.50983	9.3804	9.58154	9.91119	9.82933
TGME49_204520	0.167173	0.509729	1.18877	1.21614e-10	0.00823726	0.989016	1.0216	5.81092e-08	-0.158936	0.613751	-1.18053	3.22742e-09		8.03569	7.68889	7.80287	7.94061	7.96401	8.11836	9.12052	8.97695
TGME49_204530	0.265233	0.00469526	0.4531	2.20413e-07	-0.0913296	0.433862	0.187867	0.0686842	-0.356563	0.000145645	-0.54443	3.08067e-10		14.1647	14.0482	14.0908	13.9401	14.367	14.3788	14.5587	14.5627
TGME49_204540	-0.413593	0.306835	-0.0885643	0.834167	0.376027	0.396906	0.325029	0.455324	0.78962	0.0530221	0.464591	0.210407		6.409	6.42148	6.74667	6.7973	6.08025	5.95646	6.267	6.38982
TGME49_204550	0.0851264	0.728099	0.214461	0.268224	0.386657	0.0698011	0.129334	0.59821	0.30153	0.186427	0.172196	0.419166		8.52045	8.29461	8.71657	8.8565	8.59233	8.3863	8.59297	8.65649
TGME49_204560	0.466084	0.856124	3.54476	0.0330979	1.28779	0.616736	3.07867	0.0652184	0.821707	0.76355	-2.25697	0.177493		2.37597	2.40519	2	3.18679	2.58241	2.42848	4.3274	4.0826
TGME49_204870	1.99562	0.0146438	2.83157	0.000121294	0.303838	0.839502	0.835945	0.275682	-1.69178	0.0846246	-2.52773	0.00225289		3.31531	3.55856	2.83449	3.99219	5.31504	4.45829	5.79642	5.64127
TGME49_204880	-0.012509	0.957508	0.0283154	0.885054	-0.578028	0.000707347	0.0408245	0.860887	-0.565519	0.00114419	-0.606344	0.000119116		9.35096	9.15689	8.72728	8.65196	9.26385	9.22595	9.28369	9.28886
TGME49_205000	0.0838569	0.728901	0.10278	0.625691	-0.113971	0.672019	0.0189227	0.94975	-0.197828	0.437209	-0.216751	0.308877		8.81177	8.61406	8.53353	8.65805	8.62541	8.9675	8.8312	8.80723
TGME49_205010	-0.412256	0.00548943	-0.441774	0.00152587	0.00276608	0.997996	-0.0295175	0.899365	0.415022	0.00956582	0.44454	0.00208829		10.3199	10.3223	10.3385	10.3109	9.69801	10.1045	9.86478	9.89667
TGME49_205020	1.05672	6.10122e-05	1.49649	3.94054e-10	1.26671	3.60491e-06	0.439776	0.0991478	0.209995	0.555034	-0.229781	0.425176		6.59821	6.42148	7.95633	7.55313	7.45195	7.62686	8.01609	7.92236
TGME49_205030	-0.106276	0.581316	0.0291605	0.88299	-0.0800045	0.734921	0.135437	0.496707	0.0262718	0.927744	-0.109165	0.572073		9.2014	9.0515	9.06769	9.03561	9.09043	8.94743	9.16329	9.15313
TGME49_205040	-0.659528	6.91076e-08	-0.520305	8.57369e-06	0.0154646	0.94105	0.139223	0.385289	0.674993	1.74753e-07	0.53577	9.95501e-06		10.2969	10.2611	10.2632	10.3205	9.53541	9.711	9.74151	9.77969
TGME49_205050	0.995558	4.41168e-05	1.75594	5.40694e-16	1.21841	1.37563e-06	0.760379	0.000553005	0.222855	0.489215	-0.537524	0.0218296		6.66745	6.85234	7.74083	8.09226	7.66492	7.79803	8.57027	8.38336
TGME49_205060	-0.112594	0.728901	-0.373455	0.135703	-0.467842	0.123672	-0.260862	0.394382	-0.355249	0.283909	-0.094387	0.781268		8.06165	7.77685	7.11599	7.69021	7.67197	7.95907	7.53807	7.5834
TGME49_205070	4.72969	0.010419	4.00795	0.027017	5.6378	0.00223594	-0.721741	0.479186	0.908114	0.374741	1.62985	0.0407356		2	2.40519	5.37834	4.88407	4.16397	4.54633	3.54881	4.01883
TGME49_205080	2.4388	0.0751972	2.73247	0.0292493	3.33056	0.0140387	0.293664	0.83016	0.891758	0.476947	0.598094	0.577013		2.67394	2.40519	4.86113	4.13878	3.57986	4.03997	3.97472	4.0826
TGME49_205090	2.21881	0.0333121	1.92741	0.0522565	2.01653	0.0814151	-0.2914	0.812701	-0.202278	0.892439	0.0891219	0.944413		3.47833	2.40519	4.29753	4.50598	4.08161	4.98484	4.59066	4.06166
TGME49_205100	0.227907	0.425111	0.113479	0.685063	0.693865	0.00780427	-0.114429	0.73137	0.465957	0.0969856	0.580386	0.0141581		7.3952	7.24665	8.00992	7.99936	7.5003	7.59625	7.32558	7.53293
TGME49_205110	-0.632028	0.0931014	-0.586624	0.079116	-0.178014	0.733262	0.0454041	0.933702	0.454014	0.337684	0.40861	0.302812		6.63325	6.69869	6.51919	6.47731	5.97011	6.16552	6.1494	6.06619
TGME49_205120	-0.748326	0.0594092	-0.336933	0.373491	0.0399717	0.948257	0.411393	0.363388	0.788298	0.0774073	0.376905	0.362799		6.63325	6.30797	6.46905	6.5577	5.80024	5.74948	6.19628	6.12794
TGME49_205130	-0.102156	0.497413	0.0243608	0.881289	-0.0925974	0.592751	0.126516	0.428225	0.00955815	0.969603	-0.116958	0.430533		10.4704	10.7207	10.4298	10.5719	10.4862	10.511	10.6307	10.6184
TGME49_205140	5.29439	1.88483e-10	5.90224	3.42417e-13	6.20033	5.26783e-14	0.60785	0.0758333	0.905943	0.00953151	0.298092	0.400375		2.37597	2.98024	7.43611	7.62951	6.62201	6.71395	7.43573	7.05198
TGME49_205150	0.750651	1.36711e-05	0.567672	0.000621304	1.84672	9.11372e-31	-0.182979	0.373998	1.09607	8.12417e-12	1.27905	2.45374e-18		7.90561	8.09692	9.73113	9.91528	8.69285	8.79852	8.51587	8.60765
TGME49_205160	0.927464	4.96688e-07	1.07522	4.51768e-10	1.62502	1.08189e-19	0.147752	0.530443	0.697552	0.000176998	0.5498	0.00147924		7.6896	7.83537	9.20422	9.49629	8.58113	8.77593	8.87714	8.7706
TGME49_205170	0.0903055	0.593155	0.391582	0.00305023	0.0483561	0.823927	0.301277	0.0390199	-0.0419494	0.856311	-0.343226	0.013922		10.6468	10.2762	10.5582	10.4906	10.5179	10.6113	10.8578	10.8722
TGME49_205180	0.218734	0.0565934	0.015627	0.913698	0.394654	0.000391253	-0.203107	0.0888687	0.17592	0.175995	0.379027	0.000300078		10.9353	10.8782	11.3362	11.2694	11.1579	11.091	10.8614	10.9809
TGME49_205190	-0.609739	0.00462557	-0.100029	0.67735	-0.604801	0.0113802	0.509709	0.0194519	0.00493721	0.990993	-0.504772	0.0253205		8.40355	8.4364	8.00992	7.66624	7.89936	7.72445	8.42038	8.21691
TGME49_205200	0.0469866	0.847413	0.277514	0.129729	-0.892458	7.94722e-06	0.230527	0.280161	-0.939445	2.77871e-06	-1.16997	1.9363e-10		8.89352	8.94922	7.71954	8.23764	9.06921	8.85132	9.24519	9.14755
TGME49_205210	1.22163	0.000579726	1.10832	0.000946021	1.09978	0.00494331	-0.113314	0.815696	-0.121849	0.829023	-0.0085353	0.986778		5.43622	5.99243	6.94311	6.63385	6.96986	6.806	6.69307	6.86817
TGME49_205220	-0.364569	0.025633	-0.286667	0.063086	-0.0811067	0.725312	0.0779016	0.729049	0.283462	0.136871	0.20556	0.24117		9.33242	9.57758	9.45664	9.31157	9.05579	9.14013	9.2211	9.1269
TGME49_205230	0.792759	0.528511	1.69579	0.0925373	0.836304	0.567685	0.90303	0.439031	0.0435449	0.982328	-0.859485	0.453225		3.62479	2.72118	3.74403	3.829	3.99426	3.44842	4.30313	4.58645
TGME49_205240	-0.419644	0.0153521	-0.256652	0.1213	0.165249	0.445262	0.162992	0.438273	0.584892	0.00114667	0.421901	0.0114208		9.08284	8.91085	9.12548	9.19491	8.5199	8.65242	8.79358	8.6978
TGME49_205250	0.275468	0.00774941	-0.289145	0.00378072	-0.281617	0.0088427	-0.564613	5.68253e-09	-0.557085	2.05252e-08	0.00752794	0.962483		12.8527	12.6808	12.5088	12.4682	12.9983	13.0903	12.4236	12.535
TGME49_205265	2.81819	3.14408e-63	2.85661	3.56537e-68	1.71722	7.18778e-20	0.0384179	0.869298	-1.10097	1.35138e-11	-1.13939	1.1724e-13		6.9435	6.86845	8.65062	8.54427	9.68761	9.67971	9.79144	9.6502
TGME49_205280	-0.0698825	0.648502	0.246548	0.0422136	-0.531113	2.27327e-05	0.31643	0.0119736	-0.461231	0.000371982	-0.777661	1.86154e-11		11.0295	10.9067	10.3138	10.5392	10.8347	10.9648	11.2679	11.1622
TGME49_205290	0.245929	0.139816	0.52822	0.000214081	-0.202346	0.308421	0.282292	0.0860884	-0.448275	0.0100738	-0.730566	1.07613e-06		9.30552	9.21786	9.11737	9.01677	9.63081	9.36257	9.82058	9.75544
TGME49_205300	0.246	0.160118	0.430269	0.00481367	-0.170456	0.425934	0.184269	0.3363	-0.416456	0.0240224	-0.600725	0.000161951		9.18378	9.20841	9.14158	8.92882	9.303	9.57371	9.6851	9.56066
TGME49_205310	4.84606	0.0333155	4.88792	0.0233673	3.15272	0.281007	0.041853	0.985926	-1.69334	0.495875	-1.73519	0.412915		2	2	2	2.88828	3.16567	3.62054	3.41931	3.43799
TGME49_205320	-0.287126	0.00473863	-0.0821232	0.463989	-0.1993	0.0798912	0.205003	0.0614696	0.0878261	0.528941	-0.117177	0.305228		11.6873	11.7989	11.4981	11.5852	11.4666	11.4474	11.6862	11.6375
TGME49_205330	0.499993	0.000191878	0.430291	0.0010224	-0.0844078	0.663856	-0.0697023	0.722059	-0.584401	3.06676e-05	-0.514699	0.000124843		10.5822	10.2019	10.3489	10.2973	10.8735	10.9356	10.8233	10.8462
TGME49_205340	-0.00939547	0.961962	-0.611045	3.28056e-07	-0.161968	0.286317	-0.60165	1.01298e-06	-0.152572	0.339171	0.449078	0.000275866		13.1911	13.3245	13.2056	12.9837	13.3005	13.197	12.481	12.7983
TGME49_205350	0.0737958	0.569182	-0.0429991	0.74008	-0.158909	0.215031	-0.116795	0.37585	-0.232704	0.0574035	-0.11591	0.343776		11.197	11.1015	10.9405	11.0344	11.1828	11.2657	11.1097	11.1051
TGME49_205360	0.239862	0.0654303	0.126926	0.333609	0.105084	0.531664	-0.112936	0.465671	-0.134778	0.412415	-0.0218418	0.900734		9.9144	9.93192	10.0874	9.97749	10.161	10.1631	10.0384	10.0604
TGME49_205370	0.06501	0.779567	0.133493	0.491858	-0.844426	1.93389e-05	0.0684832	0.791829	-0.909436	4.02608e-06	-0.977919	8.42344e-08		8.86801	8.72435	8.06159	7.88975	8.75063	8.97545	8.90462	8.95653
TGME49_205380	0.164421	0.262801	-0.0533498	0.73265	0.181404	0.256525	-0.217771	0.131311	0.0169821	0.945033	0.234753	0.0888326		9.93033	9.79749	9.96617	10.11	10.0544	10.0031	9.8077	9.81806
TGME49_205390	0.422989	0.0431917	0.364519	0.0654965	0.123362	0.67019	-0.0584705	0.844255	-0.299627	0.232238	-0.241157	0.287894		8.50161	8.25228	8.76932	8.25382	8.73725	8.8685	8.72559	8.76251
TGME49_205398	0.890077	0.778683	0.0151512	0.997781	1.15933	0.746745	-0.874926	NA	0.269253	NA	1.14418	0.690015		2	2.72118	2	3.18679	2.58241	2.75842	2.116	2.63176
TGME49_205402	1.73361	0.407915	0.994396	0.634025	0.145296	0.970197	-0.739212	0.748905	-1.58831	0.550046	-0.8491	0.72886		2.92077	2	2	2.88828	2.99618	3.62054	2.87758	2.98318
TGME49_205410	-0.0332658	0.960479	-0.184203	0.721779	0.278032	0.649409	-0.150937	0.816045	0.311297	0.621251	0.462235	0.348558		6.32578	6.15881	7.01477	5.91083	6.50047	5.82182	5.86434	6.24869
TGME49_205420	1.02674	0.397961	1.14161	0.295898	0.384749	0.828566	0.114868	0.939523	-0.641992	0.681071	-0.75686	0.551365		2.67394	3.84564	2.83449	3.99219	3.99426	4.15645	4.03491	4.27686
TGME49_205425	0	1	1.52944	0.773107	2.98396	0.601062	1.61289	NA	3.06741	NA	1.45453	NA		2	2	2	2.88828	2	2	2.116	2.31522
TGME49_205430	7.01677	4.83356e-05	7.25347	1.73996e-05	6.25382	0.000574116	0.236699	0.803266	-0.762955	0.422288	-0.999654	0.198511		2	2	4.29753	4.50598	5.03766	5.10568	5.35194	5.20819
TGME49_205440	0.166392	0.195629	-0.314557	0.00508707	0.443677	0.00016984	-0.480949	1.46092e-05	0.277285	0.0315486	0.758233	1.04945e-12		10.6209	10.6491	11.0511	11.1007	10.8189	10.782	10.23	10.4058
TGME49_205450	0.510808	0.606935	0.831142	0.318041	0.490976	0.677464	0.320334	0.770052	-0.0198325	0.990184	-0.340166	0.734049		4.09586	3.84564	4.86113	3.829	3.99426	4.70777	4.70622	4.57171
TGME49_205460	0.733465	3.17606e-06	0.490613	0.00161048	0.153721	0.49413	-0.242852	0.18351	-0.579744	0.000960351	-0.336892	0.051666		8.74126	8.93399	8.93547	9.03561	9.43533	9.69664	9.30141	9.35115
TGME49_205470	-0.0215662	0.874853	-0.451652	2.46993e-06	0.419938	2.41531e-05	-0.430086	1.39301e-05	0.441504	1.03783e-05	0.87159	2.13113e-21		13.6548	13.5453	14.0501	13.992	13.5208	13.6366	13.0608	13.2332
TGME49_205480	0.423225	0.102902	0.8636	9.15603e-05	-0.150371	0.683325	0.440374	0.0779487	-0.573596	0.0493633	-1.01397	2.58726e-05		7.52213	7.342	7.46198	7.1483	7.66492	8.0295	8.30137	8.26809
TGME49_205490	-0.337957	0.00448406	-0.232865	0.0472237	-0.575394	1.19899e-06	0.105092	0.495734	-0.237437	0.0882563	-0.342529	0.00420122		11.2202	11.2169	10.4781	10.7733	10.8635	10.8995	11.0007	10.9715
TGME49_205500	-0.49942	0.00176912	-0.498674	0.000772469	-0.498764	0.00405171	0.000746155	0.99741	0.000655891	0.998617	-9.02633e-05	0.999493		9.47443	9.57267	8.9075	9.11746	9.07455	8.97545	8.93455	9.11488
TGME49_205510	-0.189587	0.222715	-0.519743	7.20253e-05	0.097237	0.608675	-0.330156	0.0241423	0.286823	0.0738415	0.61698	3.19646e-06		10.2873	10.5726	10.4525	10.6006	10.2824	10.2094	9.83916	9.99212
TGME49_205520	2.16182	6.54413e-06	2.6583	2.34621e-09	2.87702	1.44044e-09	0.49648	0.269156	0.715201	0.118752	0.21872	0.637298		4.66875	3.55856	6.78815	6.84079	5.97011	6.29823	6.65042	6.56376
TGME49_205530	0.641884	0.70118	2.95339	0.00850242	3.17048	0.00995597	2.31151	0.0331642	2.52859	0.0286171	0.217087	0.851083		2.37597	2.98024	4.5108	4.88407	3.31734	2.42848	4.66872	4.41539
TGME49_205540	-0.287354	0.120268	-0.116497	0.543595	-0.35554	0.0738632	0.170857	0.427737	-0.0681864	0.812169	-0.239044	0.216586		9.20722	9.49959	8.84989	9.12187	9.16732	8.9675	9.204	9.28209
TGME49_205550	-0.0948104	0.772653	0.262634	0.31666	0.256023	0.423756	0.357444	0.21153	0.350833	0.261093	-0.00661112	0.986008		8.17298	7.70692	7.93802	8.40634	7.81902	7.9184	8.38034	8.04214
TGME49_205558	0.401633	0.00500883	-0.321187	0.0233915	0.624893	6.96624e-06	-0.72282	8.41858e-08	0.22326	0.183565	0.94608	3.33517e-13		11.3633	11.1542	11.9378	11.8369	11.7778	11.5381	10.7661	11.0982
TGME49_205562	-0.237348	0.299325	-0.34195	0.0838815	-0.059595	0.851403	-0.104603	0.711389	0.177753	0.532255	0.282355	0.20427		8.4237	8.73317	8.35178	8.65196	8.44364	8.24216	8.25783	8.2369
TGME49_205570	-0.451826	0.0368933	0.0434562	0.867308	-0.0354962	0.917989	0.495283	0.019706	0.41633	0.0894265	-0.0789525	0.766337		8.47771	8.73756	8.56967	8.58321	8.37181	7.90181	8.61162	8.69695
TGME49_205580	0.402721	0.00532206	0.321654	0.019948	0.490384	0.00110238	-0.0810664	0.678121	0.0876638	0.672763	0.16873	0.286609		9.19261	9.30328	9.82381	9.66003	9.68412	9.60992	9.53557	9.59933
TGME49_205590	3.53498	0.0218251	3.34585	0.0232657	2.09806	0.282519	-0.189129	0.900302	-1.43692	0.335117	-1.24779	0.34419		2.37597	2.40519	2.83449	3.434	4.24188	4.15645	4.00513	4.10325
TGME49_205600	-0.330794	0.147996	-0.391487	0.0553939	-0.328176	0.206495	-0.0606923	0.848202	0.00261838	0.994527	0.0633107	0.825893		8.254	8.58511	8.20634	8.01843	8.11139	8.08934	7.94924	8.12525
TGME49_205615	-0.468563	0.0615841	-0.490263	0.0338822	-0.084632	0.820452	-0.0216995	0.95733	0.383931	0.186081	0.405631	0.108513		8.26521	9.01941	8.67294	8.54427	8.25923	8.18844	8.14458	8.26007
TGME49_205625	-0.489577	0.0688517	0.0788835	0.797687	-1.60206	4.04923e-08	0.56846	0.0304117	-1.11248	0.00038887	-1.68094	1.21205e-09		8.10597	7.88371	6.05871	6.65836	7.43546	7.60653	8.22429	7.918
TGME49_205630	-0.405688	0.379034	-0.426251	0.295827	-0.611184	0.23092	-0.0205626	0.97646	-0.205496	0.758395	-0.184934	0.729398		6.23746	6.62477	5.9163	5.82681	5.80024	6.29823	5.92126	6.14298
TGME49_205640	-0.448399	0.00686874	-0.624941	3.55955e-05	-0.264191	0.175288	-0.176542	0.387764	0.184209	0.400159	0.360751	0.0340653		9.50313	9.88519	9.49473	9.39781	9.20428	9.31637	9.08715	9.08145
TGME49_205650	-0.0121657	0.938567	-0.160733	0.150358	-0.0693831	0.645066	-0.148568	0.247052	-0.0572174	0.726588	0.0913502	0.479385		11.2079	11.2263	11.0972	11.1907	11.1389	11.2705	11.0143	11.0973
TGME49_205658	5.5694	0.00163514	5.55754	0.00123696	4.84462	0.00985138	-0.0118635	0.991202	-0.724785	0.473167	-0.712921	0.403557		2.37597	2	5.00882	3.829	5.08071	5.04652	5.00598	5.09935
TGME49_205662	1.60103	0.0351014	2.15819	0.00143363	0.85169	0.399264	0.557157	0.471948	-0.749344	0.426685	-1.3065	0.0728704		3.47833	3.84564	4.5108	4.13878	4.9933	4.85294	5.40991	5.43686
TGME49_205670	0.287229	0.0781062	0.109867	0.525051	0.00736336	0.983315	-0.177363	0.338037	-0.279866	0.127903	-0.102503	0.589079		9.62563	9.43347	9.68245	9.4123	9.76221	9.87725	9.55626	9.72329
TGME49_205680	0.0763074	0.700143	0.521769	0.000317022	-0.7091	1.00313e-05	0.445461	0.00387852	-0.785408	9.54327e-07	-1.23087	4.93064e-17		10.1936	9.85318	9.21946	9.4123	10.1484	10.0697	10.6564	10.4458
TGME49_205690	0.461528	0.0112536	0.0235294	0.920486	0.107555	0.676257	-0.437998	0.0157553	-0.353973	0.0915737	0.0840255	0.714666		9.1296	8.75065	9.22703	8.90852	9.37825	9.44792	8.92166	9.03048
TGME49_205700	0.0209278	0.886424	-0.488268	1.64639e-06	0.0493759	0.752376	-0.509195	1.03259e-06	0.0284481	0.875272	0.537643	1.20657e-07		13.2578	13.1428	13.3027	13.199	13.2654	13.1778	12.5996	12.8188
TGME49_205710	-0.237834	0.0911733	-0.495732	5.77089e-05	0.0650097	0.734921	-0.257898	0.0735453	0.302843	0.0430271	0.560741	8.27006e-06		10.4643	10.4306	10.6313	10.4008	10.3075	10.1009	9.93409	9.97262
TGME49_205720	-0.388832	0.189673	-0.0483778	0.884027	-0.224166	0.545192	0.340454	0.275022	0.164666	0.690825	-0.175788	0.596802		7.28935	7.6798	7.11599	7.38704	7.12184	7.11038	7.39899	7.49438
TGME49_205730	0.35257	0.115373	-0.154254	0.507953	-0.250256	0.363882	-0.506824	0.0165852	-0.602826	0.0108893	-0.0960027	0.727907		8.36759	8.46845	8.26629	8.09226	8.53932	8.97545	8.16324	8.35996
TGME49_205740	-0.342342	0.0273203	-0.714501	1.18765e-07	0.192703	0.288501	-0.372159	0.0155519	0.535046	0.000659409	0.907204	3.5303e-11		9.59485	9.61624	9.93419	9.67212	9.20671	9.32573	8.87817	8.91261
TGME49_205750	0.477612	0.00446008	0.653863	1.635e-05	0.234478	0.269171	0.176251	0.366265	-0.243134	0.24947	-0.419385	0.0130012		8.53904	8.40914	8.72728	8.69407	8.92904	8.97148	9.13349	9.11551
TGME49_205760	3.36442	0.211474	5.35875	0.0196598	0	1	1.99433	0.37782	-2.47073	0.430356	-4.46506	0.0608037		2	2	2	2	2.58241	2.75842	3.87944	3.59201
TGME49_205770	-1.70642	0.226217	0.362332	0.78371	-0.446108	0.81095	2.06875	0.138824	1.26031	0.485829	-0.80844	0.565095		3.31531	4.08497	3.74403	3.18679	2.80408	2.75842	4.37475	3.53236
TGME49_206290	-1.15493	0.131599	-0.102622	0.904399	-0.988467	0.276902	1.05231	0.193375	0.166464	0.902225	-0.885845	0.285304		4.9722	5.28617	5.00882	3.434	4.08161	4.26424	5.22849	4.8412
TGME49_206300	-0.152746	0.619904	-0.200834	0.452813	0.289813	0.353526	-0.0480883	0.900454	0.442559	0.135689	0.490647	0.0531912		7.93398	7.5659	7.95633	8.11901	7.69293	7.52219	7.39899	7.71331
TGME49_206310	-0.538408	0.0111856	-0.430618	0.0282941	0.00794658	0.988347	0.10779	0.712135	0.546355	0.0201994	0.438565	0.0381646		8.4287	8.39808	8.61648	8.24575	7.96974	7.77998	8.01982	7.95822
TGME49_206320	0.15556	0.380113	-0.499811	0.000558978	0.295457	0.0905568	-0.655371	5.75517e-06	0.139896	0.500185	0.795267	2.84914e-08		9.60371	9.58734	9.9109	9.87139	9.86582	9.61756	8.97832	9.20777
TGME49_206330	0.0603795	0.80359	0.490509	0.00414518	-0.228904	0.348835	0.43013	0.0192186	-0.289284	0.226825	-0.719414	8.32503e-05		8.39847	8.45251	8.35178	8.07416	8.51599	8.45046	8.95222	8.86957
TGME49_206340	0.187078	0.182659	0.221707	0.0890567	0.150615	0.338734	0.0346291	0.861848	-0.0364628	0.86408	-0.0710919	0.656078		11.4296	11.238	11.6521	11.3173	11.5056	11.5428	11.5828	11.5343
TGME49_206350	0.0455512	0.795158	-0.0437478	0.791407	-0.0536087	0.79839	-0.089299	0.621014	-0.0991599	0.606506	-0.00986096	0.962483		10.126	9.90094	10.015	9.92288	10.0285	10.1009	9.96777	9.9824
TGME49_206360	-0.279465	0.27107	-0.232341	0.322605	0.0433394	0.906925	0.0471242	0.8914	0.322804	0.254345	0.27568	0.270134		8.47771	8.0269	8.50893	8.13656	7.95825	8.03712	8.03831	8.04748
TGME49_206380	-0.296832	0.164119	0.0671975	0.777809	-0.671172	0.00180042	0.364029	0.0853777	-0.37434	0.127021	-0.73837	0.000193567		8.6881	9.0158	8.20634	8.18799	8.40606	8.72024	8.9983	8.85214
TGME49_206390	0.393622	0.0658014	0.18893	0.384422	0.0196083	0.956192	-0.204692	0.400696	-0.374014	0.1299	-0.169322	0.491075		8.19073	8.04118	8.28089	8.01843	8.62541	8.3683	8.28442	8.32523
TGME49_206400	3.52314	1.80264e-72	3.3977	2.0698e-70	5.16279	7.47525e-160	-0.125439	0.491585	1.63964	2.70824e-38	1.76508	2.71881e-49		5.87722	5.93241	10.9149	11.0179	9.31206	9.36257	9.14633	9.27301
TGME49_206415	-0.35117	0.0300777	-0.516326	0.000333729	0.206646	0.272615	-0.165156	0.391476	0.557816	0.000654131	0.722972	6.29459e-07		9.32975	9.54789	9.544	9.7282	9.12939	9.05264	8.90663	8.95085
TGME49_206430	-0.528979	0.000629323	-0.574261	6.92065e-05	-0.274316	0.1325	-0.0452823	0.850099	0.254663	0.188143	0.299945	0.0695335		9.7899	9.93574	9.70429	9.48948	9.43533	9.22595	9.19661	9.38157
TGME49_206440	1.82419	0.00371654	2.81559	4.63174e-07	2.56964	3.32282e-05	0.9914	0.0558738	0.745447	0.232238	-0.245954	0.682286		4.09586	3.3903	5.83945	6.06548	5.54758	4.9204	6.31027	6.08707
TGME49_206450	-1.00479	1.8538e-11	-0.47762	0.00172697	-0.647224	5.79254e-05	0.527171	0.0010763	0.357567	0.0525651	-0.169604	0.357548		10.622	11.0415	10.18	10.2191	9.89324	9.79202	10.501	10.2269
TGME49_206460	-0.0457629	0.849256	0.117742	0.55506	0.527571	0.00504116	0.163505	0.469571	0.573334	0.00252253	0.409829	0.0211563		8.70467	8.91085	9.48845	9.19072	8.86585	8.64746	8.97928	8.87409
TGME49_206470	0.108292	0.403731	0.113303	0.350173	0.135808	0.324253	0.00501075	0.979719	0.0275162	0.887198	0.0225054	0.882942		11.1133	11.2845	11.3962	11.2813	11.2749	11.3438	11.2759	11.351
TGME49_206480	-0.129242	0.364571	-0.392452	0.000683887	0.272011	0.0461153	-0.26321	0.0431035	0.401254	0.00220124	0.664463	5.55963e-09		10.2096	10.186	10.4265	10.5042	10.0477	10.0918	9.74995	9.86074
TGME49_206490	0.0899988	0.739763	-0.364875	0.0777996	0.126507	0.667496	-0.454874	0.0351862	0.0365081	0.921295	0.491382	0.02067		8.51576	8.57533	8.9075	8.44208	8.75396	8.49539	8.0602	8.2975
TGME49_206500	-0.204813	0.437956	-0.0876638	0.740785	-0.0800489	0.826639	0.117149	0.708043	0.124764	0.722533	0.00761496	0.982658		8.00926	7.96833	8.06159	7.78232	7.62185	7.95103	7.88118	7.92381
TGME49_206510	-0.806232	4.47999e-11	0.0736971	0.628773	-0.719117	1.58987e-08	0.879929	6.54862e-13	0.0871155	0.64543	-0.792814	9.97419e-11		11.7465	11.7831	10.9428	11.135	10.8811	11.0369	11.9812	11.6808
TGME49_206540	-0.599313	6.88474e-06	-0.0274842	0.875375	-0.333539	0.0282239	0.571828	1.46161e-05	0.265774	0.107371	-0.306055	0.03189		10.2914	10.2987	9.9388	9.98235	9.66303	9.73462	10.3909	10.1346
TGME49_206550	3.01351	2.03883e-13	3.53318	1.8618e-19	2.35567	1.8433e-07	0.519671	0.138829	-0.657839	0.106347	-1.17751	0.000405517		4.09586	4.55188	6.12498	6.63385	7.22136	6.89253	7.66491	7.49046
TGME49_206560	3.47322	0.00656233	2.93735	0.0183607	1.63598	0.348303	-0.535863	0.653167	-1.83723	0.15024	-1.30137	0.280787		2.37597	2.72118	3.74403	2.88828	4.38612	4.85294	4.14825	4.24004
TGME49_206570	2.9449	0.00113761	2.48321	0.00481367	0.400909	0.820452	-0.461685	0.62302	-2.54399	0.016398	-2.0823	0.0374328		3.13148	2.98024	3.74403	2.88828	5.41932	4.98484	4.70622	4.92477
TGME49_206580	-0.728314	2.85236e-05	-0.415587	0.0134854	-0.274343	0.200591	0.312727	0.116519	0.453971	0.0277971	0.141244	0.508607		9.17489	9.16016	8.66183	9.05881	8.50812	8.37432	8.80875	8.70119
TGME49_206590	-0.112326	0.461123	0.0538619	0.72925	-0.126979	0.449027	0.166188	0.281068	-0.014653	0.95375	-0.180841	0.207165		10.5039	10.5415	10.4033	10.3899	10.3554	10.4665	10.6921	10.4521
TGME49_206600	-0.258297	0.206574	-0.534112	0.00184213	0.283574	0.193895	-0.275815	0.190677	0.541871	0.00697969	0.817686	2.00388e-06		8.59787	8.80187	9.00749	8.96366	8.5199	8.36225	8.0871	8.25431
TGME49_206605	-0.782071	0.10358	-0.572208	0.186506	-0.0808397	0.911989	0.209863	0.739301	0.701231	0.219033	0.491368	0.320734		5.96234	6.10545	5.9163	5.99023	5.1225	5.50774	5.47654	5.5313
TGME49_206610	-0.0592301	0.792314	-0.441976	0.0068477	0.242138	0.23993	-0.382746	0.0318543	0.301368	0.137732	0.684114	2.67942e-05		9.38219	8.99394	9.39084	9.48606	9.12425	9.16468	8.70952	8.81586
TGME49_206620	-1.11695	0.733797	2.4893	0.23513	1.09074	0.727776	3.60625	0.17024	2.20769	0.500241	-1.39856	0.538949		2.37597	2.40519	3.35978	2	2.3204	2	3.50692	3.40511
TGME49_206630	0.313368	0.103336	0.376172	0.0315812	-0.0682128	0.816132	0.0628035	0.812701	-0.381581	0.0726409	-0.444384	0.0168406		8.96058	8.65177	8.80006	8.70588	8.99802	9.25237	9.25866	9.11742
TGME49_206640	-0.0912337	0.577888	0.0725941	0.638025	-0.0997957	0.588643	0.163828	0.306796	-0.00856202	0.974419	-0.17239	0.251425		10.0933	10.2349	10.1365	10.004	10.1685	9.96771	10.2724	10.2026
TGME49_206650	-0.0459845	0.961458	1.67102	0.00202683	-0.438884	0.645023	1.717	0.00243865	-0.392899	0.699122	-2.1099	0.000915126		4.9164	4.38279	4.69657	3.99219	4.57858	4.70777	6.38733	5.957
TGME49_206660	2.20867	2.69204e-05	2.98444	7.70103e-10	2.79826	1.0563e-07	0.775774	0.0905261	0.589592	0.274676	-0.186182	0.724366		4.59957	3.19979	6.78815	6.33248	5.72084	6.2466	6.79231	6.67137
TGME49_206670	-0.607451	2.04575e-05	-0.245706	0.0966063	0.122574	0.520752	0.361745	0.0187423	0.730025	5.70847e-07	0.36828	0.0119684		10.3253	10.7007	10.5702	10.7117	9.91272	9.92524	10.3452	10.2109
TGME49_206680	0.711896	0.00704493	0.604035	0.0172635	0.80585	0.00340587	-0.10786	0.773108	0.093954	0.820553	0.201814	0.505524		7.93398	7.13126	8.53353	8.24575	8.43951	8.11836	8.14969	8.22045
TGME49_206690	0.443897	0.000166849	-0.0570273	0.692351	0.0767037	0.651006	-0.500924	1.22116e-05	-0.367194	0.00476321	0.133731	0.33297		10.59	10.5187	10.7436	10.5277	11.0022	10.9935	10.4341	10.5587
TGME49_206695	0.410554	0.199095	0.161753	0.628773	-0.201271	0.628074	-0.248801	0.501826	-0.611825	0.0746455	-0.363024	0.277689		8.09972	7.11785	7.60813	7.40163	8.20676	7.97502	7.88528	7.82162
TGME49_206700	0.854882	0.000753841	0.147883	0.612667	0.826598	0.0027789	-0.706999	0.0031197	-0.0282838	0.953681	0.678715	0.00610641		6.92947	6.86845	7.63111	7.75984	7.64354	7.82468	7.03637	7.04932
TGME49_206710	0.100707	0.7345	0.101945	0.706498	-0.341474	0.22978	0.00123799	0.997149	-0.44218	0.109913	-0.443418	0.0723498		8.1966	8.65177	7.74083	8.33969	8.45186	8.62741	8.4497	8.6256
TGME49_207005	0.113905	0.947203	-0.556343	0.67779	-0.319458	0.870806	-0.670248	0.672279	-0.433363	0.831614	0.236885	0.889227		2.92077	4.08497	3.35978	3.434	3.99426	3.25294	3.00342	3.47013
TGME49_207010	0.255288	0.847849	-0.00617223	0.997781	0.275382	0.865767	-0.26146	0.856634	0.0200942	0.991213	0.281555	0.831035		3.75774	3.55856	3.35978	4.13878	3.90128	3.7743	3.54881	3.75744
TGME49_207015	4.13099	0.0524097	2.5385	0.244593	3.08441	0.21322	-1.59248	0.28602	-1.04658	0.588246	0.545902	0.759578		2.37597	2	2.83449	3.434	3.99426	3.7743	2.81029	3.02706
TGME49_207020	0.107075	0.772696	0.296041	0.308203	0.196088	0.627293	0.188966	0.604603	0.0890131	0.855498	-0.0999531	0.785108		6.99828	6.93113	7.21057	7.11326	7.16248	6.9582	7.35244	7.1495
TGME49_207030	0.820376	0.422722	1.20714	0.170236	-0.00467027	1	0.386763	0.734957	-0.825047	0.520971	-1.21181	0.23331		3.62479	3.84564	2.83449	4.13878	4.51724	4.15645	4.91281	4.39878
TGME49_207040	-0.417144	0.130336	-0.328952	0.195056	-0.326577	0.320249	0.0881916	0.815341	0.0905662	0.840225	0.00237463	0.995109		7.49381	7.75968	7.27034	7.34235	7.15243	7.2996	7.31954	7.30016
TGME49_207050	1.9721	0.162907	2.15031	0.100262	0.333248	0.886888	0.178208	0.92168	-1.63885	0.340192	-1.81706	0.220385		3.47833	2	3.35978	2.88828	2.80408	4.9204	4.30313	4.36498
TGME49_207060	-0.230536	0.0241686	-0.363696	0.000100316	0.165017	0.145871	-0.13316	0.26282	0.395553	7.79682e-05	0.528713	9.29496e-09		12.0482	12.0473	12.2625	12.165	11.7618	11.8726	11.6502	11.7175
TGME49_207065	0.438173	0.0878522	0.430975	0.0671769	0.883538	0.000360119	-0.00719851	0.984686	0.445364	0.104695	0.452563	0.0573371		7.48425	7.2092	7.99228	8.38447	7.81265	7.75249	7.71636	7.83402
TGME49_207070	-0.183964	0.623504	0.30305	0.327381	-0.320159	0.437978	0.487015	0.136635	-0.136194	0.792839	-0.623209	0.0545734		6.88656	6.9912	6.65993	6.60891	6.72055	6.806	7.37007	7.08608
TGME49_207080	-0.617869	0.00620162	-0.493527	0.0192705	-0.240525	0.399249	0.124342	0.693005	0.377343	0.173477	0.253001	0.317216		8.28187	8.62358	8.44552	8.01843	7.86899	7.83346	7.89546	8.04748
TGME49_207100	-0.26947	0.159403	-0.498784	0.00209087	0.0865208	0.740064	-0.229314	0.261044	0.35599	0.0875157	0.585305	0.000587989		8.66713	8.70206	8.80006	8.74646	8.41449	8.42165	8.19985	8.18336
TGME49_207110	-2.95492	0.240196	0.479088	0.816399	-0.202487	0.944345	3.434	0.183563	2.75243	0.347935	-0.681574	0.757634		2.37597	3.55856	2	3.434	2.3204	2	3.58952	3.06965
TGME49_207120	-0.714595	0.00239792	-0.37861	0.0949828	-0.0717155	0.844033	0.335986	0.215474	0.64288	0.0150954	0.306894	0.230629		8.20826	8.1637	8.11147	8.11901	7.72041	7.16702	7.84381	7.78375
TGME49_207130	0.981004	0.421606	1.97887	0.0460188	1.39641	0.276352	0.997865	0.370377	0.41541	0.787507	-0.582455	0.605275		2.92077	3.3903	4.04716	4.13878	4.24188	3.02677	4.59066	4.54177
TGME49_207140	1.68746	0.000123149	1.55781	0.000227827	1.1572	0.0223835	-0.129645	0.833208	-0.530258	0.33453	-0.400614	0.419462		5.78676	4.38279	6.70395	5.95107	6.72055	6.9582	6.70238	6.72897
TGME49_207150	2.63954	0.0146607	4.40464	4.45026e-06	2.95247	0.00851632	1.7651	0.00933559	0.312933	0.791369	-1.45216	0.0420106		3.13148	2	4.69657	4.39365	4.45317	4.03997	5.83078	5.79512
TGME49_207160	3.42087	2.20584e-06	4.17095	1.24548e-09	2.33018	0.00541033	0.750089	0.181393	-1.09069	0.103343	-1.84078	0.000873123		2.92077	3.3903	4.69657	4.96491	6.22157	5.26985	6.58145	6.51837
TGME49_207170	0.403057	0.00146149	-0.113332	0.419828	0.57309	5.70477e-06	-0.516389	1.92463e-05	0.170033	0.278421	0.686422	5.23453e-09		10.2818	10.2853	10.9565	10.7592	10.6885	10.6823	10.0707	10.2626
TGME49_207180	-0.43849	0.0630771	0.0254743	0.927326	0.174181	0.559605	0.463964	0.0440839	0.612671	0.0140339	0.148707	0.572073		8.00926	7.89947	8.00992	8.21303	7.46012	7.59625	8.05294	7.90776
TGME49_207200	-0.578578	0.027962	-0.622877	0.00771195	-0.356793	0.259839	-0.0442999	0.911658	0.221785	0.551339	0.266085	0.368945		7.62144	7.85974	7.46198	7.34235	7.10109	7.26109	7.11864	7.15197
TGME49_207210	1.44309	0.0337566	3.04603	1.20614e-07	0.981774	0.244988	1.60294	0.00259055	-0.461318	0.604616	-2.06426	0.00040843		3.13148	4.38279	4.69657	4.61019	5.24108	4.78218	6.43278	6.60778
TGME49_207230	0.209777	0.303827	0.813319	3.2041e-07	0.0527435	0.856937	0.603542	0.000287397	-0.157034	0.539806	-0.760576	9.67861e-06		8.25962	8.50497	8.43249	8.44208	8.61813	8.56555	9.20646	9.17706
TGME49_207240	-0.109162	0.507399	-0.208243	0.137013	-0.676695	2.77479e-06	-0.0990809	0.593104	-0.567533	0.000152055	-0.468452	0.000951962		10.1152	9.96973	9.3705	9.37211	9.86582	10.007	9.76391	9.90624
TGME49_207250	2.97698	5.2575e-08	2.61083	1.10543e-06	1.50401	0.0282809	-0.366151	0.527207	-1.47297	0.00824569	-1.10682	0.0367451		4.09586	3.70923	5.00882	5.2494	6.8381	6.0796	6.07251	6.26252
TGME49_207350	1.62441	0.298874	3.42511	0.00656994	2.19316	0.173629	1.80071	0.112155	0.568755	0.740121	-1.23195	0.288528		2.37597	2.72118	3.35978	3.829	3.31734	3.25294	4.48674	4.68561
TGME49_207370	-0.28468	0.026125	-0.149044	0.254635	-0.0502138	0.789337	0.135635	0.380385	0.234466	0.10381	0.0988307	0.502619		10.9971	11.0407	10.8454	11.0702	10.6434	10.8244	10.9187	10.8205
TGME49_207390	-0.0668808	0.805004	0.286555	0.164913	0.219486	0.405676	0.353436	0.112889	0.286367	0.270046	-0.0670694	0.800548		8.31461	8.33574	8.41935	8.63353	8.03685	8.46747	8.64821	8.56828
TGME49_207400	-0.123292	0.351119	0.469337	1.38169e-05	-0.901345	3.42484e-16	0.592629	5.07588e-08	-0.778053	7.74059e-12	-1.37068	2.85073e-38		11.9565	11.7045	10.8528	11.006	11.7198	11.7064	12.3276	12.2827
TGME49_207403	1.40658	0.175562	2.36222	0.00828144	-0.383681	0.832829	0.955648	0.345986	-1.79026	0.172516	-2.7459	0.0117235		3.99172	2.40519	2	3.64498	4.51724	4.36452	5.50873	4.98163
TGME49_207407	2.57863	0.358643	3.11898	0.217655	-0.540108	0.906337	0.540358	NA	-3.11873	NA	-3.65909	0.153214		2.37597	2	2	2	2.58241	3.25294	3.2263	3.22843
TGME49_207410	3.5091	1.60046e-05	4.01741	2.15436e-07	3.85694	3.01743e-06	0.508309	0.432834	0.347839	0.6512	-0.16047	0.815177		2.92077	2.98024	5.67225	5.99023	4.94753	5.98825	6.0139	6.00167
TGME49_207420	0.215779	0.277788	-0.116837	0.554802	0.42198	0.0288866	-0.332615	0.0770265	0.206201	0.360285	0.538817	0.00160527		9.10797	8.76363	9.47581	9.26842	9.24506	9.06759	8.87508	8.78823
TGME49_207430	-0.328681	0.0272918	0.121019	0.42612	-0.0785092	0.706431	0.449701	0.00122709	0.250172	0.156996	-0.199529	0.206349		9.47685	9.43076	9.32893	9.4123	9.09306	9.16468	9.57412	9.57505
TGME49_207440	-0.0198361	0.89797	-0.700765	1.10682e-11	0.00659091	0.975723	-0.680929	1.27742e-10	0.026427	0.889629	0.707356	7.356e-12		13.5179	13.5979	13.648	13.4794	13.5649	13.5116	12.7269	12.9778
TGME49_207450	-0.125185	0.458821	-0.0304317	0.866202	-0.0978749	0.630987	0.0947528	0.621442	0.0273097	0.915752	-0.0674432	0.714441		9.37703	9.44962	9.32189	9.31157	9.28701	9.29111	9.35256	9.4124
TGME49_207460	0.140149	0.400586	-0.145281	0.340487	-0.12383	0.534324	-0.285431	0.0582166	-0.263979	0.132397	0.0214515	0.920515		9.38733	9.35277	9.27158	9.22805	9.54505	9.4706	9.18669	9.26329
TGME49_207470	2.18998	2.29122e-11	2.15659	7.68623e-12	1.14927	0.00432084	-0.0333859	0.940665	-1.0407	0.00317455	-1.00732	0.00175236		5.07771	5.46627	6.36322	6.33248	7.31446	7.38566	7.31954	7.31351
TGME49_207480	0.873334	4.9239e-06	0.859478	2.78296e-06	0.399795	0.0865699	-0.0138555	0.967415	-0.473539	0.0343298	-0.459684	0.0236067		8.08081	8.4201	8.41935	8.81893	9.24742	8.97941	9.05299	9.16299
TGME49_207590	-0.194477	0.428963	-0.0587956	0.819784	-0.857646	0.00031435	0.135682	0.630405	-0.663169	0.00903115	-0.798851	0.000331459		8.30921	8.23996	7.43611	7.43039	8.00927	8.16082	8.10301	8.32083
TGME49_207600	0.416535	0.22123	0.588229	0.0466363	-0.672849	0.093235	0.171694	0.672997	-1.08938	0.00317662	-1.26108	0.000128968		6.91531	6.5267	6.18833	6.02834	7.24047	7.02101	7.36715	7.24549
TGME49_207610	5.46895	0.00179834	6.15138	0.000258921	5.14763	0.00485271	0.682434	0.369545	-0.321317	0.761734	-1.00375	0.165466		2	2.40519	4.69657	4.70737	4.57858	5.32067	5.56084	5.61993
TGME49_207620	-0.0532821	0.73215	-0.435157	0.000102991	-0.043375	0.818152	-0.381875	0.00128516	0.00990704	0.966624	0.391782	0.000856263		10.726	10.8762	10.7062	10.8038	10.6937	10.8056	10.3189	10.4159
TGME49_207630	-0.40212	0.149714	-0.441526	0.0774906	-0.450693	0.150866	-0.0394061	0.922194	-0.0485732	0.919137	-0.00916708	0.982333		7.75468	7.85166	7.01477	7.57904	7.45195	7.36159	7.26089	7.47074
TGME49_207640	-0.160896	0.350619	-0.706362	3.11923e-07	0.132147	0.498366	-0.545466	0.000197869	0.293043	0.0895881	0.838509	1.79269e-09		10.2762	10.2334	10.3454	10.4224	10.1673	10.0148	9.36214	9.71661
TGME49_207650	2.49208	0.0357679	1.86136	0.108064	1.0706	0.521166	-0.630725	0.608651	-1.42148	0.295387	-0.790753	0.543616		2.37597	3.19979	3.35978	3.434	4.57858	4.26424	3.81224	4.06166
TGME49_207665	1.32334	4.54865e-08	1.20223	2.73836e-07	-0.080936	0.856911	-0.121113	0.721049	-1.40428	2.08281e-07	-1.28316	6.18367e-07		6.99828	7.09065	7.32774	6.63385	8.29165	8.39225	8.06743	8.35888
TGME49_207680	0.14309	0.351227	-0.17233	0.214367	0.470751	0.00057165	-0.315421	0.0216775	0.327661	0.0256554	0.643081	2.09387e-07		9.9856	10.0282	10.5642	10.3954	10.2509	10.0339	9.84758	9.82312
TGME49_207690	-0.219802	0.240908	-0.572878	0.000195677	0.0596947	0.823566	-0.353076	0.0443095	0.279497	0.175942	0.632572	9.03008e-05		8.98112	8.90696	8.94467	9.04958	8.72033	8.73436	8.31357	8.4372
TGME49_207700	1.26483	0.0146874	1.39805	0.00291243	1.99676	7.91344e-05	0.133217	0.838083	0.731936	0.171176	0.598719	0.19934		4.52691	4.55188	6.41711	6.27022	5.80024	5.46319	5.72513	5.82028
TGME49_207710	0.378705	0.0802708	0.203212	0.346818	0.50383	0.0260114	-0.175493	0.489158	0.125125	0.672625	0.300618	0.167901		8.18484	7.88371	8.52128	8.55737	8.50812	8.3129	8.17164	8.31198
TGME49_207720	-0.127676	0.553993	-0.520917	0.00161293	0.242607	0.26468	-0.393241	0.0316681	0.370283	0.0738613	0.763524	5.07805e-06		8.67555	8.63303	8.91688	8.87753	8.61447	8.42746	8.16661	8.11385
TGME49_207730	3.61938	0.00997255	3.87817	0.00345991	4.6679	0.00073993	0.258788	0.817876	1.04851	0.265319	0.789727	0.331001		2.67394	2	5.26537	5.04146	4.16397	4.36452	4.22776	4.67186
TGME49_207740	4.61812	0.0455026	5.53331	0.00935003	0	1	0.915191	0.659952	-3.72443	0.143106	-4.63962	0.0350402		2	2	2	2	3.45456	3.02677	4.12074	3.56249
TGME49_207750	-0.0546111	0.68949	0.185474	0.0818628	0.136264	0.295931	0.240085	0.0309864	0.190875	0.128367	-0.0492105	0.714657		11.0013	10.895	11.049	11.1163	10.8887	10.9016	11.1419	11.1273
TGME49_207760	-0.136197	0.416382	-0.571782	1.82964e-05	0.146354	0.425725	-0.435586	0.00242797	0.282551	0.0911612	0.718137	1.08018e-07		9.8507	10.0336	10.0063	10.1581	9.83472	9.78072	9.27357	9.46868
TGME49_207770	0.245174	0.0764222	-0.408838	0.0010496	0.171656	0.281241	-0.654012	8.97255e-08	-0.0735181	0.7034	0.580494	3.07008e-06		10.4459	10.4839	10.6927	10.5847	10.6754	10.7441	9.92019	10.1809
TGME49_207780	3.94846	9.15161e-15	2.89724	1.58696e-08	3.39708	2.91953e-10	-1.05121	0.00211529	-0.551379	0.217377	0.499834	0.215513		3.87947	3.3903	6.30725	6.75246	7.13211	7.0812	6.13572	6.06619
TGME49_207790	3.97317	2.23878e-10	3.49643	1.59194e-08	3.50059	1.24739e-07	-0.476739	0.30944	-0.47258	0.391674	0.00415905	0.99462		3.31531	3.19979	6.12498	6.02834	6.40209	6.63584	5.98368	6.14298
TGME49_207800	0.00559005	0.992251	-0.114132	0.66393	0.432124	0.104229	-0.119722	0.707243	0.426534	0.117354	0.546255	0.016839		7.78616	7.68889	8.30967	8.03724	7.75403	7.73386	7.49853	7.74157
TGME49_207820	-0.243581	0.0481417	-0.350039	0.00158485	0.195074	0.1522	-0.106457	0.481878	0.438655	0.000312655	0.545113	7.19839e-07		10.5978	10.5639	10.7489	10.7983	10.3367	10.3398	10.1608	10.2989
TGME49_207830	0.412355	0.0188629	0.0510493	0.810176	0.0215044	0.941838	-0.361306	0.0374691	-0.390851	0.0525651	-0.0295449	0.906084		8.56195	8.5456	8.58151	8.57034	8.89327	9.03373	8.58041	8.62738
TGME49_207840	0.425068	0.00109391	-0.235874	0.0806006	0.486186	0.0001976	-0.660941	1.48289e-07	0.0611189	0.757405	0.72206	3.19854e-09		13.0109	12.889	13.5044	13.3683	13.4097	13.3417	12.5006	12.9022
TGME49_207865	1.33885	0.0225374	1.84164	0.000424293	0.607386	0.450641	0.502799	0.408797	-0.73146	0.312272	-1.23426	0.0310098		4.28399	4.38279	5.00882	4.70737	5.38539	5.5929	5.90523	5.99616
TGME49_207875	0.894419	0.209653	1.24698	0.0443229	-0.367941	0.740064	0.352566	0.664976	-1.26236	0.14208	-1.61493	0.0271757		4.52691	4.19122	3.74403	4.27183	4.9933	5.26985	5.26665	5.60553
TGME49_207880	0.940157	5.96015e-07	1.91736	2.10238e-30	0.220838	0.422531	0.977198	4.0953e-09	-0.719319	0.000832941	-1.69652	1.37079e-20		7.56812	7.54602	7.76181	7.78232	8.41869	8.54966	9.5297	9.37097
TGME49_207900	-0.139154	0.48599	0.0089809	0.969049	-0.084653	0.738815	0.148134	0.488912	0.0545006	0.852296	-0.0936339	0.660138		8.87535	9.01941	8.9075	8.82977	8.89629	8.71074	9.00866	8.90528
TGME49_207910	-0.615681	0.00114657	0.104017	0.617958	-0.494341	0.0212073	0.719699	6.34747e-05	0.12134	0.6813	-0.598359	0.00177033		8.61987	8.73756	8.07841	8.26982	7.99246	8.15383	8.84282	8.72053
TGME49_207920	-0.0825446	0.774508	0.227079	0.320341	-0.244607	0.402382	0.309624	0.213597	-0.162063	0.623617	-0.471686	0.042396		8.06165	8.10374	8.04457	7.66624	8.15232	7.81585	8.309	8.3042
TGME49_207930	0.0170501	0.939974	0.290116	0.0553184	-0.355951	0.0493145	0.273066	0.103822	-0.373001	0.0424928	-0.646067	2.58464e-05		9.32708	9.23038	9.08444	8.79149	9.35433	9.2326	9.57539	9.56159
TGME49_207940	0.194095	0.433114	0.337035	0.106485	0.422258	0.0825707	0.14294	0.604726	0.228163	0.414655	0.0852227	0.748727		8.01592	7.92279	8.47122	8.31677	7.98681	8.3316	8.3643	8.2404
TGME49_207950	0.449911	0.0207595	0.38191	0.0382801	0.260711	0.270479	-0.0680003	0.805278	-0.189199	0.461308	-0.121199	0.601031		8.51106	8.32994	8.89806	8.48383	8.83476	8.90643	8.73809	8.86278
TGME49_207955	-0.631717	0.645279	0.839614	0.443488	-0.271448	0.879345	1.47133	0.228296	0.360269	0.854813	-1.11106	0.371211		3.31531	3.97026	2.83449	3.829	3.45456	3.02677	4.50813	4.06166
TGME49_207960	-0.0351306	0.881271	-0.0280249	0.899679	-0.0392695	0.891487	0.00710572	0.980687	-0.00413887	0.990542	-0.0112446	0.967572		8.7612	8.89522	8.91688	8.68217	8.71351	8.87702	8.77053	8.83064
TGME49_207965	1.93306	0.0312224	2.46312	0.00241449	-1.52094	0.396767	0.530066	0.578082	-3.454	0.0202628	-3.98407	0.00305745		3.62479	2.98024	2	2.88828	4.85138	4.70777	5.316	5.17931
TGME49_207970	0.967204	0.0260394	0.950521	0.0185772	0.686483	0.184469	-0.0166831	0.980031	-0.280721	0.639379	-0.264038	0.598467		4.9722	6.07802	6.24901	6.27022	6.62201	6.41976	6.49838	6.52603
TGME49_207980	0.11447	0.779414	-0.203189	0.555561	-0.310021	0.479981	-0.317658	0.397761	-0.424491	0.317331	-0.106832	0.804207		6.78116	6.83606	6.51919	6.5046	7.06938	6.73284	6.65522	6.57119
TGME49_207990	-0.0516303	0.824344	-0.533417	0.00133028	0.392817	0.041858	-0.481787	0.00662411	0.444448	0.0214278	0.926234	1.17107e-08		9.10797	9.34416	9.59164	9.64477	9.1723	9.18539	8.50793	8.86731
TGME49_208010	0.127219	0.516657	0.0080299	0.971923	-0.0542994	0.841096	-0.119189	0.576726	-0.181518	0.419063	-0.0623293	0.773835		8.74927	8.83092	8.78989	8.69407	8.92904	8.90226	8.81627	8.78024
TGME49_208020	1.76866	1.68124e-09	3.46133	1.5613e-39	1.28793	0.000137479	1.69267	9.63172e-14	-0.480726	0.164735	-2.1734	1.05841e-17		5.47536	5.66375	6.82848	6.75246	7.24047	7.26109	9.08627	8.72636
TGME49_208030	-0.0648985	0.564863	0.277219	0.00202683	0.0538697	0.671205	0.342118	0.000190126	0.118768	0.298554	-0.22335	0.0170499		13.5019	13.345	13.4947	13.4649	13.3573	13.3644	13.7279	13.6774
TGME49_208040	-0.0269156	0.935724	-0.0577027	0.84195	0.204837	0.502481	-0.0307871	0.931376	0.231752	0.456329	0.262539	0.308253		8.08714	8.2645	8.30967	8.435	7.84422	8.42165	8.1883	8.05147
TGME49_208050	-0.105304	0.680074	0.0536001	0.831008	0.300166	0.207464	0.158904	0.544162	0.405471	0.0796443	0.246566	0.26292		8.4485	8.93016	9.00749	9.00248	8.48428	8.72024	8.83544	8.68245
TGME49_208070	-0.783286	1.14156e-06	-0.411191	0.00813078	-0.263627	0.187035	0.372095	0.0343885	0.519659	0.00560175	0.147564	0.452899		9.16295	9.34128	9.0336	8.95873	8.41449	8.54432	8.89754	8.7938
TGME49_208080	0.353813	0.710892	0.317866	0.71052	-0.192815	0.880777	-0.035947	0.97646	-0.546628	0.632089	-0.510681	0.589351		4.45039	4.19122	4.69657	3.64498	4.45317	4.78218	4.52921	4.64394
TGME49_208090	-0.607173	0.0899499	-0.707256	0.025769	-0.228173	0.627307	-0.100082	0.844528	0.379	0.408952	0.479083	0.196902		7.2219	6.94638	6.51919	7.09541	6.70688	6.2466	6.32842	6.48729
TGME49_208200	-0.102423	0.652628	0.0778102	0.717325	0.0287628	0.922915	0.180234	0.425113	0.131186	0.614713	-0.0490474	0.840148		9.08601	9.27032	9.35678	9.07256	9.19206	8.94743	9.11094	9.38895
TGME49_208300	0.144832	0.415162	-0.0417012	0.826788	0.486232	0.00238588	-0.186533	0.296347	0.3414	0.0478409	0.527933	0.000270085		9.17191	9.13708	9.61489	9.65699	9.29388	9.30379	9.01053	9.20718
TGME49_208310	0.106972	0.646683	0.227118	0.231999	-0.031465	0.922242	0.120147	0.624674	-0.138437	0.615928	-0.258583	0.215165		8.32	8.41463	8.20634	8.42789	8.46816	8.47871	8.54721	8.63449
TGME49_208320	0.248058	0.299325	0.329128	0.114231	0.0421597	0.906578	0.0810704	0.788565	-0.205898	0.483209	-0.286969	0.222428		8.02254	7.99058	7.84279	8.18799	8.12173	8.38033	8.34214	8.32083
TGME49_208340	-0.277853	0.07421	-0.19589	0.19077	-0.148069	0.439194	0.0819632	0.691104	0.129784	0.532255	0.0478211	0.805461		9.69152	9.65853	9.56205	9.49969	9.27316	9.52307	9.44766	9.51179
TGME49_208350	-0.244302	0.248838	0.244529	0.195448	-0.00115648	1	0.488831	0.00896874	0.243146	0.328385	-0.245685	0.239121		8.43863	8.51523	8.65062	8.32445	8.21161	8.2618	8.73695	8.70119
TGME49_208360	-0.479375	0.0713281	0.0358407	0.909835	-0.273294	0.400462	0.515216	0.0505635	0.206081	0.574097	-0.309135	0.275164		8.0552	7.87577	7.84279	7.57904	7.22136	7.75249	8.09419	7.91069
TGME49_208370	-0.173698	0.154729	0.67351	3.27394e-11	-0.266667	0.0306152	0.847209	1.63451e-16	-0.0929681	0.55314	-0.940177	5.86774e-20		11.4026	11.3837	11.0785	11.1684	11.1319	11.3056	12.1345	11.9944
TGME49_208390	-0.0276557	0.939459	-0.0210805	0.950094	0.32332	0.284804	0.0065752	0.987424	0.350976	0.252865	0.344401	0.20427		8.1307	8.63774	9.08444	8.31677	8.46816	8.27474	8.39907	8.36851
TGME49_208400	-0.62894	1.30332e-05	-0.508323	0.000212153	-0.389629	0.0168393	0.120617	0.542139	0.239311	0.201076	0.118693	0.509482		9.77428	10.0193	9.60911	9.43021	9.30527	9.24252	9.39696	9.39367
TGME49_208410	-0.0566177	0.828429	0.44321	0.016152	0.0613578	0.845798	0.499828	0.00960692	0.117976	0.692745	-0.381852	0.0620183		8.254	8.13736	8.14379	8.33969	8.11139	8.1747	8.69793	8.57199
TGME49_208420	-0.401946	0.0531387	0.375942	0.0494354	-0.404964	0.0769248	0.777888	3.2673e-05	-0.00301706	0.993682	-0.780905	5.15224e-05		9.13572	8.70654	8.54568	8.53106	8.42288	8.65737	9.42183	9.1946
TGME49_208430	0.541457	0.00600432	0.569559	0.00182423	-0.000820316	1	0.0281014	0.924283	-0.542278	0.014903	-0.570379	0.00413639		8.21983	8.03406	8.26629	8.01843	8.71009	8.61728	8.77716	8.60765
TGME49_208440	0.477065	0.000200251	0.156737	0.25964	0.74954	3.23597e-09	-0.320328	0.0166319	0.272475	0.0640118	0.592803	1.09182e-06		10.029	10.0282	10.9149	10.6412	10.5198	10.4875	10.1236	10.2427
TGME49_208450	0.0309442	0.816347	0.625241	9.10316e-12	-0.712393	2.43239e-13	0.594297	2.77123e-10	-0.743337	4.00842e-14	-1.33763	1.23993e-47		12.145	12.0561	11.426	11.3572	12.2058	12.053	12.7335	12.7189
TGME49_208490	-0.278652	0.197244	0.138543	0.517635	-0.131197	0.633793	0.417195	0.0406169	0.147456	0.606506	-0.26974	0.213218		8.61111	8.7463	8.23662	8.75785	8.45186	8.35007	8.85017	8.78345
TGME49_208500	-0.278548	0.0386313	0.203332	0.113882	0.0412933	0.839654	0.48188	9.45592e-05	0.319841	0.0275819	-0.162038	0.256114		10.087	10.2793	10.1839	10.2617	9.93635	9.87725	10.4211	10.3551
TGME49_208510	-0.807567	9.97791e-06	0.265011	0.157643	-0.266399	0.240356	1.07258	7.99293e-10	0.541168	0.0105064	-0.531409	0.00429341		9.10173	9.27032	8.91688	8.92882	8.22126	8.54966	9.60299	9.28379
TGME49_208530	0.244939	0.0535083	0.0269938	0.862205	0.0551227	0.764539	-0.217946	0.0961409	-0.189817	0.202258	0.0281289	0.865806		10.1397	10.1649	10.2888	10.1365	10.3943	10.3987	10.2032	10.1552
TGME49_208540	-0.320159	0.155728	-0.386062	0.0538723	0.01421	0.971305	-0.0659032	0.831121	0.334369	0.194367	0.400272	0.063336		8.32	8.47898	8.52128	8.32445	8.19702	7.95103	7.91961	8.1113
TGME49_208550	-0.123525	0.497764	0.256416	0.0924536	-0.306546	0.0863448	0.379941	0.0149485	-0.183021	0.370291	-0.562962	0.000196114		9.78211	9.49441	9.24948	9.4123	9.45386	9.59451	9.93754	9.86566
TGME49_208560	-0.0737323	0.74892	0.0475793	0.830459	0.2115	0.331891	0.121312	0.608651	0.285233	0.178819	0.163921	0.41713		9.45498	9.21786	9.62637	9.48606	9.04497	9.47341	9.3533	9.42425
TGME49_208570	-0.104392	0.46428	0.0695951	0.614782	0.00466571	0.988347	0.173987	0.214829	0.109058	0.512677	-0.0649294	0.667347		10.5145	10.4708	10.4133	10.5654	10.3143	10.4637	10.5456	10.5787
TGME49_208580	-0.591096	0.00047085	-0.213015	0.212454	-0.0311562	0.911647	0.378081	0.0329164	0.55994	0.00276789	0.181859	0.343136		8.94323	9.03376	8.9629	8.95379	8.50022	8.28757	8.79031	8.76494
TGME49_208590	-0.150371	0.253767	-0.203064	0.0824935	-0.234522	0.0847568	-0.0526922	0.755632	-0.0841501	0.626324	-0.0314579	0.845035		10.4752	10.4033	10.1564	10.2456	10.2708	10.3103	10.2376	10.2374
TGME49_208710	0.335654	0.216192	0.377094	0.122282	-0.284152	0.393045	0.0414392	0.91221	-0.619806	0.032688	-0.661245	0.0102745		7.43546	7.84354	7.11599	7.53999	8.03685	7.9184	8.10125	7.93968
TGME49_208718	-0.353788	0.00283969	-0.292182	0.00982626	-0.25771	0.0530116	0.0616058	0.714467	0.0960785	0.569434	0.0344727	0.829155		10.6307	10.6848	10.2996	10.4803	10.3266	10.2817	10.3644	10.3685
TGME49_208722	-0.365206	0.0552461	-0.0498152	0.821892	-0.443768	0.0328277	0.31539	0.110199	-0.0785625	0.797094	-0.393953	0.0406994		8.79253	8.83503	8.54568	8.22948	8.38475	8.52278	8.78922	8.73961
TGME49_208730	2.3104	1.00296e-113	3.22663	7.41979e-235	2.75879	3.85276e-159	0.916233	1.09781e-23	0.44839	1.1168e-05	-0.467843	8.09813e-07		8.77695	8.89522	11.5801	11.5876	11.1376	11.1351	12.036	12.0666
TGME49_208740	1.1792	4.83518e-15	2.10653	6.31026e-52	1.17655	1.00303e-13	0.927334	1.81043e-11	-0.00264993	0.992445	-0.929983	5.76101e-11		8.23702	8.2645	9.46945	9.37211	9.44359	9.39258	10.2122	10.4609
TGME49_208750	0.0200212	0.931862	-0.272124	0.0905128	0.0753802	0.760781	-0.292145	0.0949909	0.0553591	0.840681	0.347504	0.0389106		9.01804	9.00491	9.10921	9.06799	9.00083	9.06387	8.64701	8.82831
TGME49_208760	2.64631	2.53508e-09	2.63029	8.48219e-10	2.10328	1.63327e-05	-0.0160158	0.979901	-0.54303	0.276456	-0.527014	0.227962		4.9722	3.55856	6.12498	6.47731	6.89949	6.806	6.96468	6.70553
TGME49_208770	3.43606	0.00497708	3.63457	0.00173153	3.24304	0.0133274	0.198509	0.8664	-0.193019	0.892933	-0.391529	0.701012		2.67394	2.40519	3.74403	4.79842	4.90025	4.15645	4.8303	4.68561
TGME49_208780	0.232975	0.19359	0.284243	0.0737764	0.692838	2.15765e-05	0.0512682	0.828667	0.459863	0.00806124	0.408594	0.00924878		8.80411	8.62831	9.47581	9.3497	8.97254	8.92707	8.97832	9.02441
[truncated: 7,714 more rows]

## Sheet: 48h-UT_Volcano plot
Geneid	logFC	adj-P-Val
TGME49_200010	-0.0140933	0.922155
[truncated: 8,285 more rows]
