# Supplementary material for: A plant-like mechanism coupling m6A reading to polyadenylation safeguards transcriptome integrity and developmental gene partitioning in Toxoplasma
Source: eLife. 2021 Jul 15;10:e68312. doi: 10.7554/eLife.68312 (PMC8313237; doi:10.7554/eLife.68312)
Supplement: Supplementary file 6. — List of T. gondii parasite strains and transgenic lines as well as plasmids used in this work. Primers and DNA construct used in this work are also charted in the table. [file elife-68312-supp6.xlsx]

## Sheet: Strains and Plasmids
Supplementary Table : Description of T. gondii Strains, Plasmids, DNA synthesis and Primers
List of T. gondii parasite lines as well as plasmids used in this work. Primers and DNA synthesis construct used in this work are also charted in the table.
T. gondii strain	Strain Type		Genotype		Reference or source
RHku80	I		RH Dku80		Farhat et aL., 2020
RHku80 METTL3-HF	I		RH Dku80, TGME49_217350-HA-Flag-dhfr		This study
RHku80 METTL14-HF	I		RH Dku80, TGME49_268840-HA-Flag-dhfr		This study
RHku80 WTAP-HF	I		RH Dku80, TGME49_212960-HA-Flag-dhfr		This study
RHku80 METTL14-HF METTL3-(Ty)2	I		RH Dku80, TGME49_268840-HA-Flag-dhfr, TGME49_217350-(Ty)2-HXGPRT		This study
RHku80 CPSF1-HF	I		RH Dku80, TGME49_224280-HA-Flag-dhfr		This study
RHku80 CPSF4-HF	I		RH Dku80, TGME49_201200-HA-Flag-dhfr		This study
RHku80 WDR33-HF	I		RH Dku80, TGME49_268250-HA-Flag-dhfr		This study
RHku80 Fip1-HF	I		RH Dku80, TGME49_230230-HA-Flag-dhfr		This study
RHku80 PAP-HF	I		RH Dku80, TGME49_226080-HA-Flag-dhfr		This study
RHku80 OsTir1-(Ty)3	I		RH Dku80, OsTir1-(Ty)3-UPRT(-)		Farhat et aL., 2020
Pruku80 OsTir1-(Ty)3	I		Pru Dku80, OsTir1-(Ty)3-UPRT(-)		Farhat et aL., 2020
RHku80 MORC KD	I		RH Dku80, OsTir1-(Ty)3-UPRT(-), MORC-mAID-HA-dhfr		Farhat et aL., 2020
RHku80 METTL3 KD	I		RH Dku80, OsTir1-(Ty)3-UPRT(-), TGME49_217350-mAID-HA-dhfr		This study
RHku80 CPSF4 KD	I		RH Dku80, OsTir1-(Ty)3-UPRT(-), TGME49_201200-mAID-HA-dhfr		This study
Plasmid name			Description		Reference or source
pMiniHX			HXGPRT (HX), confers resistance to Mycophenolic acid and Xanthine		Farhat et aL., 2020
pDHFR-TSc3			Confers resistance to Pyrimethamine		Farhat et aL., 2020
pLIC-HF-dhfr			AmpR, PyrimethamineR,HA-Flag tag, DHFR		Farhat et aL., 2020
pLIC-(Ty)2-hxprt			AmpR, PyrimethamineR,mCherry tag, DHFR		Farhat et aL., 2020
pLIC-METTL3-HF			pLIC-TGME49_217350-HA-Flag-dhfr		This study
pLIC-METTL3-(Ty)2			pLIC-TGME49_217350-(Ty)2-HXGPRT		This study
pLIC-WTAP			pLIC-TGME49_212960-HA-Flag-dhfr		This study
pLIC-METTL14-HF			pLIC-TGME49_268840-HA-Flag-dhfr		This study
pLIC-CPSF1-HF			pLIC-TGME49_224280-HA-Flag-dhfr		This study
pLIC-CPSF4-HF			pLIC-TGME49_201200-HA-Flag-dhfr		This study
pLIC-WDR33-HF			pLIC-TGME49_268250-HA-Flag-dhfr		This study
pLIC-Fip1-HF			pLIC-TGME49_230230-HA-Flag-dhfr		This study
pLIC-PAP-HF			pLIC-TGME49_226080-HA-Flag-dhfr		This study
pTOXO_Cas9-CRISPR			pUC57/pTgTUB8-TgU6-Cas9-HA-YFP		Gay et al., 2016
pTOXO_Cas9-CRISPR::sgMETTL3			pTOXO_Cas9-CRISP/sgMETTL3		This study
pTOXO_Cas9-CRISPR::sgMETTL14			pTOXO_Cas9-CRISP/sgMETTL14		This study
pTOXO_Cas9-CRISPR::sgWTAP			pTOXO_Cas9-CRISP/sgWTAP		This study
pTOXO_Cas9-CRISPR::sgUPRT			pTOXO_Cas9-CRISP/sgUPRT		This study
R: resistant
S: sensitive
Primer name	Cloning		Primer sequence 5' to 3'
LIC-WDR33-FWD	pLIC		TACTTCCAATCCAATTTAGCGCCTCTTCGACTTGTCTCCAGTG		This study
LIC-WDR33-REV	pLIC		TCCTCCACTTCCAATTTTAGCGCGCCCCGCGGGCCCGTGGCGCCCA		This study
LIC-CPSF1-FWD	pLIC		TACTTCCAATCCAATTTAgcagttggttttcacatgcgccaga		This study
LIC-CPSF1-REV	pLIC		TCCTCCACTTCCAATTTTAGCGACGAGCAAGCGAGTGTATGCGCCC		This study
LIC-CPSF4-FWD	pLIC		TACTTCCAATCCAATTTAGCaccgccagtgtcttcgcacgcgaatctc		This study
LIC-CPSF4-REV	pLIC		TCCTCCACTTCCAATTTTAGCcgacggttcacagtggcgcaagtcgatggg		This study
LIC-METTL3-FWD	pLIC		TACTTCCAATCCAATTTAGCtctttgtgcatgtgtgggtacccg		This study
LIC-METTL3-REV	pLIC		TCCTCCACTTCCAATTTTAGCcatgtccgtctctccagagacttcttcg		This study
LIC-METTL14-FWD	pLIC		TACTTCCAATCCAATTTAGCggaagttcatccagtgaggagcttcg		This study
LIC-METTL14-REV	pLIC		TCCTCCACTTCCAATTTTAGCagtgcctcccgcactccgatctgg		This study
LIC-WTAP-FWD	pLIC		TACTTCCAATCCAATTTAGCaactccgcgaactgaacagcgacatgg		This study
LIC-WTAP-REV	pLIC		TCCTCCACTTCCAATTTTAGCgtcgtatcttcgctctcgctcgtccttgg		This study
LIC-PAP-FWD	pLIC		TACTTCCAATCCAATTTAgcttttctctgcatgccctctcgcg		This study
LIC-PAP-REV	pLIC		TCCTCCACTTCCAATTTTAGCAGTAGTCGTCTCCCCCTCCTGAATG		This study
LIC-FIP1-FWD	pLIC		TACTTCCAATCCAATTTAGCGACACAGAGATTTCTTCGGACAA		This study
LIC-FIP1-REV	pLIC		TCCTCCACTTCCAATTTTAGCCCGATGAAACGAATCGTGTGAATGA		This study
METTL3-gRNA-Fwd	CRISPR-Cas9		AAGTTGTTTGCCGCGCACTTGAAGCG		This study
METTL3-gRNA-Rev	CRISPR-Cas9		AAAACGCTTCAAGTGCGCGGCAAACA		This study
METTL14-gRNA-Fwd	CRISPR-Cas9		AAGTTGGCGGAAGAAGAGTCCAGGCG		This study
METTL14-gRNA-Rev	CRISPR-Cas9		AAAACGCCTGGACTCTTCTTCCGCCA		This study
WTAP-gRNA-Fwd	CRISPR-Cas9		AAGTTGAGCGAGGACCGCCAGTCTGG		This study
WTAP-gRNA-Rev	CRISPR-Cas9		AAAACCAGACTGGCGGTCCTCGCTCA		This study
